# Supplementary material for: Hybridization led to a rewired pluripotency network in the allotetraploid Xenopus laevis
Source: eLife. 2023 Oct 3;12:e83952. doi: 10.7554/eLife.83952 (PMC10569791; doi:10.7554/eLife.83952)
Supplement: Supplementary file 1. [file elife-83952-supp1.xlsx]

## Sheet: A. Exon TPM
Geneid	Symbol	s5_1	s5_2	s6_1	s7_1	s8_1	s8_2	s9_a_1	s9_a_2	s10.5_1	s10.5_2	s9_dmso_a_1	s9_dmso_a_2	s9_trip_a_1	s9_trip_a_2	s9_dmso_b_1	s9_dmso_b_2	s9_trip_b_1	s9_trip_b_2	s9_chx_b_1	s9_chx_b_2	s9_gfp_mo_G_1	s9_gfp_mo_G_2	s9_gfp_mo_G_3	s9_pou.3_sox_mo_G_1	s9_pou.3_sox_mo_G_2	s9_pou.3_sox_mo_G_3	s9_gfp_mo_F_1	s9_gfp_mo_F_2	s9_gfp_mo_F_3	s9_pou.2_pou.3_mo_F_1	s9_pou.2_pou.3_mo_F_2	s9_pou.2_pou.3_mo_F_3	s9_pou.2_pou.3_sox_mo_F_1	s9_pou.2_pou.3_sox_mo_F_2	s9_pou.2_pou.3_sox_mo_F_3	s9_chx_pou.2_pou.3_sox_mo_F_1	s9_chx_pou.2_pou.3_sox_mo_F_2	s9_chx_pou.2_pou.3_sox_mo_F_3	s9_e_1	s9_gfp_mo_e_1	s9_pou.3_sox_mo_e_1	s9_chx_gfp_mo_c_1	s9_chx_gfp_mo_c_2	s9_chx_sox_mo_c_1	s9_chx_sox_mo_c_2	s9_chx_pou.3_mo_c_1	s9_chx_pou.3_mo_c_2	s9_chx_pou.3_sox_mo_c_1
gene1	slc26a4.3.L	0	0	0	0	0	0	0	0	0.253	0.189	0	0	0	0	0.039	0	0	0	0.105	0	0	0	0	0	0	0	0	0	0	0	0	0	0	0	0	0	0	0	0	0	0	0	0	0	0	0	0	0
gene10	<NA>	12.216	13.077	20.041	14.232	19.12	22.677	12.572	15.144	13.318	12.542	15.605	15.225	22.002	13.444	20.787	20.716	24.259	19.746	20.912	13.236	14.552	16.315	13.03	15.753	12.723	12.321	13.345	9.999	11.459	12.491	9.434	11.029	11.129	15.708	13.577	9.001	17.328	18.331	15.245	12.081	10.882	14.305	15.778	16.741	14.048	19.831	12.81	16.989
gene100	dhx16.S	34.166	35.226	34.792	37.664	33.338	30.188	35.043	32.872	24.709	26.544	37.884	33.995	34.16	41.935	41.45	38.603	44.995	43.824	43.12	49.996	36.74	33.796	38.807	34.306	34.629	36.727	29.028	28.382	30.217	28.499	23.704	27.751	31.728	27.212	28.949	33.864	36.752	35.009	27.622	28.356	31.796	47.063	45.591	45.311	46.848	45.408	42.792	46.08
gene1000	ufm1.L	20.393	20.464	25.289	25.054	35.107	50.422	22.782	25.503	26.981	29.27	23.38	23.49	23.804	26.619	28.484	32.597	20.07	28.209	32.794	17.177	19.668	17.436	17.445	18.714	17.593	15.747	26.8	30.68	28.35	31.115	30.445	28.197	26.775	26.206	26.225	23.2	26.791	25.723	20.921	21.462	22.765	22.315	21.531	18.678	21.61	20.685	21.886	20.322
gene10000	cyp2c8.1.L	2.12	2.498	2.1	2.532	6.441	6.13	4.543	4.443	4.591	6.542	3.569	3.012	2.911	3.383	2.458	2.029	1.332	1.624	2.198	1.927	3.477	2.5	3.522	2.428	4.281	3.424	3.443	4.262	2.937	4.51	5.493	3.996	4.657	5.144	4.57	3.341	3.843	4.208	3.195	4.464	6.468	2.357	2.438	1.539	3.002	2.115	2.214	2.189
gene10001	prdm12.L	0	0	0	0	0	0	0	0.201	0.743	1.624	0.315	0.403	0	0	0	0.082	0	0.061	0.082	0	0	0	0	0.524	0	0	0	0	0	0.305	0.205	0	0.295	0.416	0.48	0.095	0	0	0.129	0.131	0.897	0.114	0	0	0	0.098	0	0
gene10002	mmel1.L	0	0	0	0	0	0.116	0.139	0.304	3.833	5.678	0.212	0.306	0	0	0	0	0	0	0	0.05	0	0	0	0.132	0.268	0.06	0.065	0.051	0	0.052	0.156	0.101	0.149	0	0.182	0	0.118	0.05	0.196	0.066	0.065	0	0.052	0.063	0.064	0	0	0
gene10003	clptm1l.S	1.581	1.651	0.877	1.065	0.735	0.909	0.948	0.637	0.177	0	0.584	0.761	0.972	0.92	0.692	0.684	0.565	1.108	1.173	0.821	0.832	0.723	0.835	0.78	0.842	0.707	0.459	0.721	0.461	0.445	0.366	0.829	0.351	0.413	0.476	0.151	0.926	0.198	0.462	0.782	0.916	0.454	0.858	0.692	0.453	0.621	0.449	0.375
gene10004	rftn1.L	2.439	2.362	0.804	0.973	0.746	1.084	1.096	1.463	0.872	1.035	1.153	0.554	0.767	1.079	0.348	0.202	0.196	0.379	0.42	0.336	0.705	0.896	0.872	0.843	0.67	0.787	0.292	0.363	0.42	0.251	0.388	0.377	0.223	0.197	0.386	0.434	0.685	0.34	0.514	1.144	0.946	1.669	1.851	1.226	1.608	1.814	1.693	1.52
gene10005	<NA>	0	0	0	0	0	0	0	0	0	0.118	0.042	0	0	0	0	0	0	0	0.164	0.039	0	0	0	0	0	0.047	0	0.04	0	0	0	0	0	0	0.048	0	0	0	0	0	0	0	0.082	0.099	0.101	0	0.135	0
gene10006	supt16h.L	42.724	42.619	38.558	34.671	32.633	37.229	33.784	32.443	20.713	21.974	32.781	31.861	33.614	36.601	32.338	31.129	34.131	32.894	39.992	42.722	35.204	34.06	35.143	32.046	32.441	33.812	32.429	33.853	33.008	31.942	29.094	30.719	30.87	32.911	29.659	38.577	39.461	38.271	28.87	32.924	34.338	39.28	38.449	38.216	37.467	39.347	37.949	39.645
gene10007	gpr143.S	0.104	0.162	0	0	0	0	2.078	1.799	4.171	3.916	1.31	1.809	1.69	1.959	0.072	0.512	0.303	0.189	0.064	0.154	0.091	0	0.103	0.102	0.069	0	0.702	0.708	0.165	0.318	0.4	0.543	0.153	0.325	0.281	0.223	0.273	0.699	1.814	1.434	2.298	0.357	0.401	0.291	0.296	0.457	0.265	0.644
gene10008	naa60.L	10.718	10.461	12.578	10.709	12.491	11.014	12.498	10.549	6.169	6.62	11.898	10.723	13.436	11.621	9.903	10.781	10.379	10.074	10.639	11.422	10.841	9.299	9.493	9.07	8.698	8.108	8.831	9.772	9.241	9.78	9.193	10.133	10.032	9.589	9.679	10.791	10.045	10.439	11.335	9.402	11.388	11.811	13.936	13.867	13.546	12.044	12.578	14.065
gene10009	<NA>	19.964	18.219	19.816	17.706	25.313	22.601	16.914	14.51	5.071	5.221	14.933	15.817	18.261	15.819	18.613	18.977	22.498	19.471	22.814	25.92	16.601	14.298	14.963	12.557	13.437	14.712	11.023	10.376	11.329	12.206	12.209	12.247	13.779	14.501	13.691	14.653	19.379	13.683	19.8	13.606	18.537	21.992	20.823	23.728	23.426	20.457	21.009	23.795
gene1001	slc46a3.L	6.259	5.125	3.628	3.724	2.533	3.1	4.02	5.904	1.161	1.308	4.867	4.727	4.073	6.038	4.064	3.676	3.706	3.222	3.548	3.692	4.062	4.361	5.069	3.274	4.743	5.317	4.955	4.521	6.105	6.789	5.074	4.663	5.324	4.498	5.371	4.372	4.676	4.618	6.126	5.061	4.539	5.423	4.609	4.345	4.686	3.208	5.657	4.366
gene10010	acer3.S	21.621	23.938	26.024	23.589	27.065	19.308	22.129	21.13	21.635	20.81	20.734	21.149	23.487	23.809	24.095	23.44	27.494	24.24	25.763	32.705	25.123	27.79	21.196	26.411	23.668	24.951	23.206	23.163	22.594	24.378	21.264	23.767	23.068	26.085	24.581	29.132	31.047	26.48	24.425	21.907	25.545	33.593	35.303	36.496	35.409	35.242	34.283	36.555
gene10011	<NA>	2.118	2.543	2.71	3.466	1.973	2.4	2.329	2.432	1.947	1.968	2.179	2.203	2.202	2.553	2.386	2.707	2.572	2.504	2.815	2.645	2.416	2.677	2.701	1.688	2.453	2.49	1.404	1.698	1.361	2.069	1.703	1.977	2.04	2.296	1.834	1.938	2.955	1.98	2.428	1.836	2.379	2.5	2.315	2.611	2.602	3.011	2.644	3.224
gene10012	aldh3b2.L	10.641	12.225	5.248	4.477	3.866	3.566	7.568	5.247	4.961	4.849	6.019	5.836	6.816	6.289	6.181	6.12	8.602	8.472	8.542	9.915	1.619	3.174	2.269	2.769	1.771	2.18	11.018	11.57	10.049	9.917	9.587	11.459	12.307	11.233	12.411	12.847	14.729	11.864	6.689	6.431	6.846	2.802	3.493	2.702	3.737	3.427	4.092	2.759
gene10013	<NA>	0.142	0.059	0.182	0.382	0.099	0.098	0	0.129	0.127	0.379	0	0.043	0.04	0.041	0.079	0.035	0.166	0.026	0.07	0.126	0.249	0.104	0.113	0	0.076	0.356	0	0	0.136	0.131	0.044	0.043	0.21	0.045	0	0.041	0.05	0.128	0.055	0	0	0.392	0.264	0.533	0.163	0.251	0.29	0.455
gene10014	<NA>	0	0	0	0	0	0.231	0	0	0	0	0	0	0	0	0	0.083	0	0	0.083	0.198	0	0	0.133	0.132	0	0	0	0	0	0	0	0	0	0.21	0	0	0	0	0	0	0	0	0	0	0	0	0	0
gene10015	atp5if1.S	35.555	33.499	19.428	32.342	18.099	19.877	13.3	16.26	7.311	7.695	16.109	14.304	14.726	14.82	17.006	19.244	21.344	14.398	20.909	34.764	8.76	9.483	7.233	8.339	9.982	6.873	19.353	12.562	15.59	19.159	13.655	16.701	19.632	21.082	23.602	30.1	30.04	30.857	16.836	14.444	12.241	14.242	20.255	16.578	19.806	18.959	16.375	17.088
gene10016	exosc6.L	68.115	68.998	72.621	75.129	85.065	67.261	45.27	46.729	36.211	34.337	47.736	41.402	48.775	45.335	51.649	56.183	62.723	52.95	55.975	81.848	65.392	65.963	66.609	52.513	54.87	58.483	57.896	56.525	53.669	55.798	63.196	58.033	67.113	74.009	65.187	88.635	80.523	75.43	50.493	44.263	43.305	80.697	90.894	96.096	95.275	90.994	92.504	87.756
gene10017	ptpn1.S	61.753	64.87	65.509	57.782	74.118	68.363	47.277	43.833	44.771	46.183	47.709	46.494	51.619	49.57	57.041	67.674	70.315	60.875	71.574	75.641	57.631	50.509	49.561	53.721	41.355	44.895	47.851	48.216	45.23	49.124	47.074	47.457	47.747	50.472	43.505	61.83	60.692	54.12	57.776	43.958	52.059	69.496	71.575	73.541	75.434	73.808	83.004	81.017
gene10018	XB22167168.L [provisional]	42.646	42.786	52.327	48.288	36.322	41.028	43.1	41.205	7.102	6.251	41.669	45.242	47.144	48.964	47.305	45.117	51.883	53.337	55.42	47.887	44.105	43.016	43.546	43.423	44.465	43.326	45.068	47.539	48.743	49.282	46.007	49.084	50.85	46.884	48.539	48.592	53.762	54.021	39.772	44.461	48.683	42.786	45.088	38.746	38.169	41.178	39.602	41.267
gene10019	tgfbrap1.L	43.192	43.034	37.403	40.302	35.018	35.422	45.087	43.568	8.074	7.909	47.592	45.748	46.968	47.815	39.581	37.169	40.115	40.248	38.109	37.175	37.86	38.654	40.965	39.601	36.385	39.594	36.048	37.16	36.554	38.855	37.031	39.916	36.655	39.415	36.924	35.35	37.743	39.075	37.715	39.558	40.521	41.948	38.576	39.468	36.773	42.113	38.626	38.588
gene1002	tmem145.L	7.412	7.594	6.766	6.008	4.493	6.232	7.85	6.179	2.073	1.508	7.219	6.453	7.856	7.299	3.936	4.33	3.478	4.5	5.224	3.585	5.586	5.038	5.595	5.526	4.664	5.818	2.801	2.439	2.875	2.98	2.722	2.404	2.81	3.152	2.408	3.02	4.365	3.594	6.335	5.408	5.452	4.401	4.098	3.898	5.218	4.259	4.082	3.657
gene10020	phax.L	153.012	151.602	150.362	145.183	137.195	166.313	140.099	137.545	105.912	108.53	138.626	136.938	150.773	147.732	136.603	136.664	142.438	143.621	154.356	142.359	119.283	111.586	119.76	115.182	107.262	120.536	145.378	150.468	145.304	148.059	143.919	148.89	147.854	150.262	150.636	156.262	161.764	160.689	128.398	127.305	136.198	142.486	140.294	150.844	139.144	143.477	151.94	147.022
gene10021	rabgap1l.S	79.699	80.467	67.688	66.595	58.439	60.928	64.563	66.822	44.894	48.92	65.88	68.855	61.37	66.713	55.602	52.442	55.441	64.137	64.754	74.387	62.934	66.668	72.685	65	70.445	60.461	56.467	62.437	56.66	56.466	60.509	54.885	49.336	49.967	54.488	53.78	53.577	60.577	56.109	70.393	57.284	57.695	57.726	57.438	56.116	61.332	61.536	54.956
gene10022	arf1.S	70.161	69.762	74.523	78.01	35.174	34.9	81.037	81.493	126.211	133.984	82.154	77.952	85.636	82.232	55.391	53.006	58.564	59.992	54.46	53.084	88.397	87.075	92.135	88.575	82.088	80.579	72.21	79.38	77.278	79.43	71.481	79.058	82.459	82.936	83.227	74.526	79.628	75.543	71.45	73.286	77.929	79.553	75.542	78.282	76.458	79.648	80.725	79.792
gene10023	scnm1.L	22.123	19.836	18.909	19.98	19.812	16.196	15.841	15.679	5.734	5.32	15.13	15.115	18.302	18.02	18.009	20.591	28.001	20.992	23.18	30.838	15.574	16	16.497	14.993	14.162	15.272	14.721	15.646	15.556	13.493	14.249	14.205	14.858	14.657	11.57	20.496	21.902	18.457	21.118	20.61	16.486	25.466	26.874	28.432	27.549	24.586	28.019	22.556
gene10024	rab29.S	24.373	25.27	22.73	23.477	13.579	17.476	15.379	16.665	5.717	6.405	16.355	18.603	15.307	19.412	15.643	13.436	13.393	16.858	17.298	17.678	16.068	21.419	20.967	16.397	19.875	17.258	20.105	19.049	20.577	20.588	19.669	17.438	17.411	15.38	19.995	21.036	17.735	20.264	17.211	22.218	19.333	12.79	17.096	13.461	13.08	14.868	15.825	13.197
gene10025	pik3r2.L	23.57	21.704	29.657	27.035	26.433	28.285	24.87	23.455	11.241	12.267	23.776	22.294	27.014	25.536	21.94	22.563	22.112	22.824	26.391	21.798	19.702	18.428	19.025	18.555	15.555	16.053	14.961	15.403	13.89	14.844	14.02	15.347	16.183	15.918	13.22	16.377	19.09	15.518	26.158	19.579	27.38	27.686	27.964	27.317	30.519	27.921	26.183	28.59
gene10026	rab38.L	0.192	0	0	0	0	0.331	0	0	0	0	0	0	0	0.14	0	0	0	0.088	0.119	0.142	0	0	0	0	0	0	0	0	0	0	0	0	0	0	0	0	0	0	0	0	0	0	0	0	0	0.141	0	0
gene10027	dnajc10.L	26.236	24.848	28.428	27.342	24.16	27.24	27.41	27.854	16.609	15.636	28.428	28.471	32.229	30.93	19.981	19.958	21.26	20.5	21.609	21.249	20.809	19.691	19.581	20.205	19.223	19.877	19.905	20.746	21.599	22.007	18.624	21.627	20.889	22.969	20.54	20.47	21.596	23.379	24.072	24.591	25.945	20.485	19.271	22.611	20.726	21.58	23.14	21.167
gene10028	ppm1g.L	93.667	89.747	95.014	83.713	92.447	81.964	70.952	62.021	75.365	77.172	66.436	60.601	74.302	68.078	82.431	87.026	109.669	89.584	90.825	121.104	79.368	81.604	80.257	71.918	75.616	87.234	72.14	68.561	67.846	65.55	71.925	69.388	75.353	85.496	76.527	92.701	91.071	76.461	73.507	68.503	76.625	136.741	142.86	151.167	148.685	141.886	148.488	144.846
gene10029	nxpe3.S	20.097	20.272	4.319	6.117	1.177	1.253	18.831	20.399	3.079	2.715	20.532	20.627	18.68	25.991	11.775	12.454	11.788	15.111	15.826	14.167	12.382	11.626	10.647	15.312	13.313	11.885	24.638	23.603	19.989	24.133	20.654	21.669	24.986	22.461	24.056	21.303	22.253	23.26	19.36	17.05	20.096	9.442	10.705	8.911	10.654	10.207	10.398	7.757
gene1003	ereg.S	0	0	0	0	0	0	0.273	0	0.22	0	0.467	0	0	0	0	0	0	0	0	0	0	0	0	0	0	0	0	0	0	0	0	0	0	0	0	0	0	0	0	0	0	0	0	0	0	0	0	0
gene10030	alx1.L	0	0.279	0.57	0.6	0.622	0.307	0.864	1.347	1.596	0.595	1.833	1.354	1.644	0.648	0.739	0.882	0.261	0.733	2.645	2.247	1.25	1.792	2.119	1.582	2.374	1.434	0.691	0.271	0.425	0.41	0.275	0	0	0	0.161	0.384	0.313	0.401	0.868	1.234	0.86	1.997	1.796	0.502	1.871	1.181	0.608	0.634
gene10031	papss1.S	37.299	35.424	44.285	39.418	36.802	39.891	33.733	34.698	24.437	23.862	36.322	32.614	37.43	36.536	39.8	40.935	42.657	43.025	43.46	40.857	40.479	38.919	40.024	35.376	36.37	38.391	33.441	37.905	35.271	34.927	33.708	34.383	37.645	37.506	39.128	36.815	43.886	38.341	33.07	31.059	36.588	42.429	40.392	42.442	38.326	41.919	39.046	40.027
gene10032	MGC130869.L	0	0	0	0	0	0	0	0	0	0	0	0	0	0.066	0	0	0	0	0	0	0	0	0	0	0	0	0	0	0	0.069	0	0	0	0	0	0	0	0	0	0	0	0	0	0	0	0	0	0
gene10033	angpt4.L	0.641	0.528	0.95	0.681	1.295	1.512	0.841	1.122	44.403	43.765	1.281	0.871	1.437	1.178	0.793	0.459	0.592	0.586	0.668	0.951	1.124	0.247	0.468	0.532	0.36	1.448	0.784	0.923	0.913	0.518	0.834	0.506	0.899	1.005	0.609	1.212	0.83	1.063	1.642	1.001	1.628	0.523	0.314	0.443	1.159	0.298	0.403	0.54
gene10034	ocel1.L	0	0	0.036	0	0	0	0	0	0	0	0	0.043	0	0	0	0	0.082	0.026	0	0	0	0.051	0	0	0	0	0	0.043	0	0	0	0	0.083	0	0	0	0.099	0	0	0	0.054	0	0.044	0	0	0	0	0
gene10035	aloxe3.L	0	0	0	0	0	0	0.215	0	0	0	0	0	0.221	0	0	0	0	0	0	0	0.273	0	0	0.307	0	0.278	0	0	0	0	0	0	0	0	0	0	0	0	0	0	0	0	0	0	0	0	0	0
gene10036	frat1.S	73.072	74.884	90.181	73.427	90.062	81.495	54.121	51.068	41.032	48.407	57.956	54.194	65.285	55.327	70.329	72.579	75.14	69.861	76.887	83.937	69.814	63.742	65.205	69.988	62.3	66.955	71.821	69.727	71.466	70.012	67.864	77.62	70.279	72.099	63.889	85.113	89.288	68.54	63.384	56.366	77.659	86.856	84.703	85.656	89.91	85.995	84.705	90.308
gene10037	glrx3.L	67.305	63.674	65.335	69.464	55.22	44.006	77.894	82.525	74.191	59.923	77.211	80.45	87.39	81.041	76.093	78.694	84.867	84.662	81.365	77.669	59.143	57.411	52.54	49.369	52.212	57.799	72.07	62.495	65.524	71.063	67.086	73.891	75.099	75.728	72.303	74.435	71.912	67.288	86.973	76.394	79.03	78.851	78.235	77.407	80.199	77.861	72.176	71.044
gene10038	tmem131.S	10.367	11.336	12.767	10.232	11.374	11.197	10.77	10.481	3.169	4.046	10.294	8.742	11.596	10.736	9.017	10.391	9.834	8.961	10.553	9.458	7.174	6.672	5.945	5.996	5.415	6.434	8.981	7.959	8.369	8.249	7.987	8.662	9.309	9.406	8.118	9.651	11.089	9.162	9.484	6.347	10.707	9.471	9.464	10.013	7.636	8.818	8.213	9.772
gene10039	XB22063306.L [provisional:btn1a1]	0	0	0	0	0	0	0.08	0	0	0	0.091	0	0	0	0	0	0	0	0	0	0	0	0	0	0	0.103	0	0.175	0.092	0	0	0.086	0	0	0	0	0	0	0	0	0	0	0	0	0	0	0	0
gene1004	cyp2a6.1.S	0.717	0.624	0.076	0	0.208	0	0	0	0.134	0	0	0.091	0	0	0	0	0	0	0	0.089	0.105	0	0	0	0.159	0.214	0	0.091	0	0	0.092	0	0	0	0	0	0	0	0	0	0.115	0.103	0.093	0.672	0.114	0	0	0
gene10040	rbm12b.3.L	31.328	28.585	29.54	29.951	31.269	36.793	24.133	28.428	45.559	45.947	27.369	29.678	24.417	30.912	28.784	27.808	23.481	32.521	31.18	26.389	32.124	36.188	35.711	37.369	39.534	36.579	29.443	29.451	26.377	30.571	31.955	33.161	29.266	28.458	30.661	22.601	24.453	27.2	22.375	25.524	25.162	31.748	31.351	29.004	31.648	29.106	30.889	28.496
gene10041	psat1.L	83.134	82.092	94.364	93.218	84.846	112.844	72.532	70.601	9.263	10.253	68.438	70.072	74.788	74.82	46.553	48.167	43.57	55.481	53.711	50.429	108.411	118.079	110.148	114.805	113.042	116.44	84.626	96.141	93.335	96.15	82.133	86.19	92.116	96.438	98.731	96.271	91.738	87.475	71.282	76.977	66.388	78.916	74.278	76.508	75.091	76.029	75.194	72.245
gene10042	trmt61b.L	7.385	8.17	7.701	6.586	7.212	5.346	6.899	7.698	5.288	6.489	7.182	8.02	6.968	8.112	6.483	6.938	7.23	7.387	8.034	9.307	7.574	7.355	7.606	5.462	7.376	7.064	9.009	6.791	6.225	6.456	6.901	6.583	7.543	7.001	6.268	7.746	10.051	8.477	7.979	6.572	7.126	6.936	5.379	7.547	6.483	7.774	8.871	7.157
gene10043	cdkl1.S	0.257	0.134	0.082	0.433	0	0.222	0.178	0	0	0	0	0	0	0.187	0.089	0	0.063	0.118	0.08	0	0.113	0.118	0.255	0.127	0.171	0.23	0.249	0.196	0.205	0	0	0	0	0	0.116	0.092	0	0	0	0.127	0.248	0.333	0.199	0	0	0	0.329	0
gene10044	usp15.L	12.692	12.982	12.993	14.524	10.27	11.726	14.615	12.924	1.022	0.96	12.726	13.186	14.84	15.77	13.196	11.485	12.018	12.94	12.02	9.597	11.793	10.438	10.157	11.014	11.527	10.303	8.996	9.84	10.619	8.098	7.175	9.736	9.583	9.905	9.398	9.374	10.61	9.561	11.613	9.438	12.444	7.787	9.481	8.949	8.768	9.829	8.478	9.073
gene10045	atp6ap1.2.S	29.534	28.91	39.337	35.693	36.991	25.299	38.831	37.318	53.671	54.448	40.551	37.11	36.384	39.389	38.605	40.603	44.159	41.821	39.943	39.144	25.339	23.879	19.855	24.005	19.427	22.562	28.422	25.848	27.117	30.197	29.167	31.242	36.966	30.574	28.124	32.598	43.694	33.506	48.434	31.684	50.351	36.939	36.896	45.229	41.503	40.387	44.531	41.377
gene10046	rbm45.S	16.682	19.33	12.87	15.786	15.517	16.503	18.136	15.634	37.763	38.292	18.048	17.994	17.84	16.111	20.858	19.666	17.806	18.377	21.103	19.5	18.056	19.971	23.179	20.79	21.701	23.603	19.008	18.596	16.151	18.169	17.776	18.619	14.246	15.686	15.981	14.312	13.757	14.802	15.532	19.414	16.985	14.75	15.138	14.599	13.75	12.886	16.644	11.436
gene10047	npy.S	0	0	0	0	0	0	0	0	0	0.587	0	0	0	0.192	0	0.163	0	0	0	0	0	0	0	0	0	0	0	0	0	0	0	0	0	0	0	0	0	0	0	0.261	0.254	0.227	0	0	0	0	0	0
gene10048	stk36.L	22.622	22.503	16.387	15.315	21.011	17.779	24.681	21.443	10.716	9.351	19.567	18.563	23.306	20.555	16.956	17.251	20.518	18.331	23.28	25.798	19.374	17.424	18.242	16.325	17.112	15.768	21.022	21.113	21.265	22.067	22.223	20.225	22.231	22.411	21.21	25.063	29.911	26.369	24.466	21.171	23.545	29.501	30.628	31.532	30.352	28.617	30.277	30.786
gene10049	efemp2.L	0	0	0	0	0	0	0.543	0.395	0.488	0.582	0.241	0.166	0.031	0.032	0.03	0.216	0	0	0	0	1.644	1.474	1.425	4.043	4.414	4.172	1.182	1.061	1.422	1.104	0.842	1.143	2.292	2.563	1.851	0.031	0	0	0.297	0.561	1.641	0	0	0	0	0	0	0
gene1005	habp2.L	0.071	0.025	0.15	0.158	0.246	0.081	0.13	0	0	0.052	0.037	0.036	0.033	0.034	0.163	0	0.023	0.021	0	0	0	0.129	0	0	0	0	0	0.071	0.037	0	0.109	0	0.035	0	0	0.101	0.083	0.035	0	0.046	0.045	0	0.036	0	0.045	0	0	0
gene10050	flt1.S	0	0	0	0	0	0	0.058	0.126	2.523	2.694	0	0.254	0	0	1.559	1.239	1.465	1.068	1.394	0.681	3.515	4.274	2.647	2.306	2.336	2.315	0.162	0.19	0.266	0.512	0.323	0.313	0	0	0	0	0	0	0	0.248	0.081	0	0	0	0	0	0	0
gene10051	<NA>	1.011	0.95	0.712	0.425	2.204	0.959	0.385	0.535	0.905	0.787	0.68	0.422	0.359	0.478	0.105	0.281	0.172	0.462	0.312	0.112	0.355	0.508	0.851	0.698	0.404	0.768	0.196	0.538	0.442	0.465	0.469	0.417	0.636	0.356	0.411	0.218	0.4	0.797	0.344	0.7	0.488	0.436	0.548	0.995	1.254	0.744	0.775	0.539
gene10052	znf385b.S	0.103	0.162	0.066	0	0.541	0.178	0	0	0.579	0	0	0	0	0	0.215	0.128	0.101	0.095	0.64	0.23	0	0.189	0	0	0	0	0	0.157	0.165	0	0.08	0	0.077	0.081	0	0	0.091	0	0	0.205	0	0	0.16	0.097	0	0	0	0.092
gene10053	tspan6.L	89.503	89.324	89.887	95.837	80.152	85.867	94.799	99.934	71.405	72.51	103.139	97.509	104.458	106.814	91.973	91.194	82.897	101.913	100.544	75.468	87.022	82.938	85.111	81.945	80.063	74.369	89.815	94.688	89.526	91.491	86.287	88.513	91.857	87.927	86.364	83.548	92.662	86.022	82.913	78.275	86.779	64.501	65.014	57.304	59.332	65.775	67.101	64.663
gene10054	ttc5.L	49.047	49.681	34.323	37.224	39.118	35.456	39.484	40.603	8.905	10.577	40.051	42.783	37.695	46.395	35.37	37.759	37.207	37.773	45.174	48.045	47.568	52.325	51.392	44.543	54.511	45.279	41.034	39.831	44.555	44.864	46.3	36.858	44.377	42.844	41.256	49.679	51.283	51.417	35.516	46.815	40.299	50.946	46.939	47.49	44.482	46.341	53.017	48.984
gene10055	dusp8.S	27.431	26.447	12.86	13.722	59.628	52.709	35.391	29.259	12.485	15.314	30.854	30.068	35.042	33.927	20.965	22.858	23.901	26.548	35.174	32.16	23.199	20.36	19.836	20.984	20.314	22.285	17.73	18.892	19.483	17.717	16.462	19.317	17.34	16.926	17.666	24.82	26.38	24.928	41.844	34.059	37.62	54.732	51.578	50.837	51.087	47.76	51.162	52.722
gene10056	parn.L	183.129	181.13	179.159	204.457	145.329	191.267	182.08	188.943	21.103	22.662	187.011	202.7	186.322	205.911	148.136	146.92	144.233	170.302	187.682	169.569	192.1	206.301	215.674	219.03	215.483	196.368	169.862	174.331	170.724	168.586	167.493	161.712	152.039	146.851	164.853	169.722	170.224	183.921	174.014	205.175	188.474	146.112	151.885	142.251	149.521	142.151	145.118	131.188
gene10057	cuedc1.L	25.227	24.69	25.988	21.838	11.468	14.545	26.176	23.958	8.139	8.932	24.849	24.131	29.686	26.798	21.844	24.352	24.349	22.675	24.497	21.872	26.271	23.769	22.017	21.807	20.498	21.018	15.833	14.684	15.134	15.485	14.247	17.263	16.671	16.187	12.875	14.089	18.243	19.386	25.716	21.408	26.058	5.666	5.547	4.638	5.497	6.083	6.148	6.261
gene10058	XB5864179.L [provisional:cyp4b1]	6.969	7.766	5.295	4.764	5.95	8.008	9.746	10.035	1.543	2.341	7.922	10.42	8.189	9.453	7.276	6.955	8.274	9.384	9.02	7.373	4.582	3.914	4.53	4.224	3.432	4.802	4.78	4.028	4.734	3.674	3.42	4.133	3.439	3.128	3.146	3.494	4.335	3.104	10.034	8.973	10.718	6.38	6.357	4.833	7.689	5.398	7.546	7.293
gene10059	<NA>	0	0	1.067	0.468	0	0	0.385	0.63	0.933	2.782	0	0.422	0	0.404	0.576	0.687	0.135	0.508	0.172	0.618	0	0	0	0.548	0	0	1.345	0.211	0.442	0	0.215	0.208	0	0.218	0.251	0.2	0.976	1.251	0	0.275	0	0	0	0	0	0	0	0
gene1006	tnni1.2.L	0	0	0	0	0	0	0.175	0	2.69	1.971	0.1	0.096	0	0	0	0	0	0	0.156	0	0	0.116	0	0.374	0.421	0.339	0	0	0	0.291	0	0	0.094	0.099	0	0	0	0	0	0.125	0	0	0	0	0	0	0.108	0
gene10060	cplane2.L	0.639	0.916	0.409	0	0.557	0.688	0.221	0.301	0.268	0.178	0.126	0.121	0.113	0.116	0.055	0.197	0.078	0.292	0.395	0.355	0.21	0.365	0.316	0.394	0.425	0.285	0.541	0.303	0.571	0.551	0.616	0.179	0.591	0.688	0.577	0.172	0.561	0.18	0.388	0.079	0.231	2.064	1.918	1.497	1.904	1.704	2.176	1.348
gene10061	hif1an.S	44.36	48.375	44.846	44.817	44.071	46.188	47.073	44.515	21.327	20.353	46.469	48.476	49.924	50.832	46.459	39.857	43.347	46.224	45.887	48.328	48.695	46.73	48.007	46.08	48.413	47.277	47.249	50.17	48.597	48.656	41.22	46.674	46.361	43.527	43.622	44.37	44.955	46.01	47.18	49.172	44.359	43.175	40.263	44.478	43.653	39.612	44.083	39.901
gene10062	ntm.S	0	0.016	0	0	0.054	0	0.086	0	0	0.034	0.049	0	0.022	0	0	0.019	0	0	0.019	0	0.081	0.028	0.061	0.061	0.021	0.138	0.06	0.094	0	0.047	0.024	0	0.046	0	0	0	0	0	0.03	0.031	0.03	0	0	0	0	0	0	0.027
gene10063	uts2r.S	0	0	0	0	0	0	0	0	0	0	0	0	0	0	0.087	0	0	0	0	0	0	0	0	0	0.084	0	0	0	0	0.097	0	0	0	0	0	0	0	0	0	0	0	0.109	0.195	0.118	0	0.278	0.215	0.112
gene10064	btg5.1.S	2.085	2.176	73.63	82.866	53.502	55.592	1.742	2.377	1.76	1.575	1.804	1.792	3.572	2.461	107.015	117.517	136.902	116.529	127.349	91.67	69.228	61.599	65.598	99.988	90.981	81.293	152.176	159.99	159.274	162.446	168.216	161.696	230.812	237.726	242.431	290.98	306.412	305.298	2.833	1.634	3.188	52.124	52.058	50.744	51.791	56.287	55.761	56.511
gene10065	pacs1.L	38.941	38.791	45.047	40.292	43.171	47.508	40.369	38.651	30.951	33.024	39.684	38.088	44.148	39.977	35.207	38.566	34.444	37.384	40.45	33.092	36.521	36.433	35.336	36.45	31.931	37.126	27.767	30.201	28.293	30.86	25.621	30.248	29.714	30.896	28.705	31.244	35.071	29.737	35.748	28.827	34.756	37.736	31.579	32.66	34.399	33.186	33.366	33.495
gene10066	casd1.S	2.832	2.435	2.516	3.088	2.012	1.898	1.451	1.664	0.117	0.35	1.493	1.593	2.083	1.717	0.616	1.653	1.354	1.174	1.459	2.099	2.16	2.108	2.129	1.241	1.292	1.781	2.437	1.993	2.502	1.488	1.458	2.278	1.902	1.684	1.231	2.901	2.809	2.203	1.327	1.296	1.467	3.298	3.698	2.704	3.202	3.628	2.77	3.077
gene10067	<NA>	0	0.071	0.087	0	0	0	0.375	0.102	0.303	0.301	0.214	0.412	0.192	0.099	0	0.251	0	0	0.419	0.301	0.238	0.619	0.134	0.668	0.541	0.121	0.131	0.515	0.323	0	0.418	0.101	0	0.106	0.122	0	0	0	0.264	0.268	0.392	0.467	0.63	0.635	0.129	0.698	0.231	0.482
gene10068	med13l.S	38.261	40.443	51.038	45.151	50.718	43.808	37.23	33.189	20.359	23.181	36.266	32.874	40.921	38.733	39.181	41.847	41.287	42.483	44.892	39.126	37.781	36.669	35.883	33.164	32.625	33.987	28.855	28.648	30.733	29.759	29.719	32.427	31.234	33.153	28.713	35.449	39.783	33.939	36.734	28.392	35.837	44.979	38.04	40.956	41.99	41.981	41.646	40.096
gene10069	maco1.S	53.701	52.899	60.368	54.73	60.624	70.914	58.825	51.232	10.35	12.779	53.591	52.727	62.799	59.325	43.719	45.351	45.865	49.083	55.346	47.462	61.242	63.528	58.008	58.765	56.733	58.759	46.339	47.735	49.522	49.842	43.917	49.529	48.364	51.92	43.788	53.62	56.39	52.089	51.276	51.661	56.757	58.44	56.442	57.017	55.795	55.052	61.268	55.581
gene1007	spata18b.S	5.748	5.634	4.893	4.122	5.841	5.17	7.333	7.703	3.691	5.059	7.273	7.061	8.76	7.709	5.874	5.901	6.087	6.896	7.261	6.003	10.691	9.5	10.495	12.126	8.487	9.473	5.082	4.369	4.651	6.555	4.98	4.718	5.661	4.817	4.649	6.428	5.004	6.113	7.201	6.129	6.464	6.245	5.229	5.765	4.054	5.041	4.77	4.533
gene10070	hoxc12.L	0.038	0.079	0	0	0.132	0.13	0.157	0.057	0.085	0.168	0.06	0.115	0	0	0	0	0.074	0.069	0.608	0.505	0.133	0	0.075	0.149	0	0.135	0.073	0.057	0.12	0.348	0.292	0.17	0.112	0.237	0.068	0.163	0	0.057	0	0.075	0.292	0.391	0.293	0	0.072	0.111	0.064	0.135
gene10071	dlx4.L	0.037	0	0	0	0	0	0	0.056	0.083	0	0	0.056	0	0.054	0.051	0	0	0	0	0	0	0.203	0	0	0.049	0	0	0.056	0.059	0	0	0.055	0	0	0	0	0	0	0.072	0	0	0	0	0	0	0	0.126	0.131
gene10072	vac14.L	21.613	22.292	26.292	22.454	16.079	16.69	20.935	18.269	17.054	15.407	20.406	18.085	22.418	19.009	20.977	21.964	23.65	21.311	24.028	22.256	14.864	12.023	14.821	12.381	12	11.473	14.624	14.648	16.028	16.343	15.564	16.208	19.445	16.444	15.646	19.604	23.067	21.481	22.277	16.448	20.119	22.595	24.737	24.283	22.457	22.237	23.921	25.621
gene10073	rhog2.L	46.747	46.331	49.01	48.324	45.695	52.004	44.501	44.096	26.986	27.307	43.644	46.929	45.988	46.552	46.301	46.255	43.665	47.947	49.003	38.615	47.072	52.192	50.812	51.715	48.313	48.534	44.198	48.309	47.018	44.524	42.17	47.085	45.653	47.555	45.902	42.756	45.878	46.066	40.302	42.227	41.473	40.179	41.37	42.026	36.772	39.098	42.473	41.982
gene10074	coq8a.S	66.944	68.449	62.417	61.878	49.706	39.121	58.501	58.61	33.464	29.352	58.988	56.119	64.785	59.13	72.426	69	82.741	77.233	82.491	80.473	62.536	63.1	53.582	53.263	55.353	55.207	70.61	64.253	64.573	68.268	67.869	70.775	74.427	75.544	71.571	87.087	91.614	76.494	63.619	57.936	55.774	67.462	74.032	72.501	67.403	63.529	61.609	61.476
gene10075	eif2b1.L	50.275	55.313	50.268	68.122	27.708	31.138	59.491	65.927	38.231	37.036	68.496	68.76	65.626	68.714	52.658	56.231	60.215	60.346	57.716	52.759	56.47	60.656	63.589	72.756	68.257	65.57	71.016	72.784	64.734	71.599	63.367	58.694	58.48	53.376	63.872	58.79	55.614	66.132	62.07	81.785	58.808	65.263	60.717	58.159	61.264	57.038	58.411	50.118
gene10076	ptn.L	0	0	0	0	0	0	0	0	0	0	0	0	0.077	0.079	0	0.067	0.212	0	0	0	0	0	0	0	0	0	0	0	0	0.084	0	0	0	0.085	0	0	0	0	0.106	0	0	0	0	0	0	0	0	0
gene10077	osbpl2.S	35.233	36.524	34.986	40.511	30.445	33.801	27.802	26.675	44.236	40.871	27.419	27.666	28.956	31.778	25.238	21.679	23.258	25.998	27.249	31.674	22.08	24.619	23.606	22.953	22.133	21.307	32.648	35.624	32.648	34.415	31.335	31.111	30.387	32.166	31.168	35.391	34.718	34.867	23.897	27.038	24.693	36.61	41.202	37.669	37.803	38.612	35.045	39.902
gene10078	<NA>	26.465	29.779	16.036	18.397	21.159	19.764	22.327	27.494	11.635	9.342	23.194	27.946	25.54	28.223	25.806	24.475	26.041	23.995	25.219	29.453	34.943	36.06	36.972	37.47	36.043	25.268	24.656	21.178	20.04	23.822	21.931	23.071	26.152	19.535	20.587	21.838	21.307	25.607	21.542	24.391	25.732	16.543	19.113	17.376	19.846	16.587	16.13	11.143
gene10079	ppp1r14a.L	94.289	90.248	70.675	73.604	66.443	74.293	69.741	76.773	31.077	30.774	75.653	76.457	78.902	79.275	66.136	64.792	64.951	77.585	77.362	73.291	55.038	56.984	60.078	60.342	66.185	55.846	82.845	77.326	77.779	75.569	73.722	72.786	44.901	44.694	49.779	60.322	60.742	67.309	60.908	76.193	63.879	89.225	86.51	81.423	85.604	82.652	85.957	75.412
gene1008	spint1.L	71.092	68.115	69.629	62.029	55.221	64.37	69.164	61.075	68.217	69.291	70.862	59.751	72.412	67.564	55.766	56.996	56.012	52.749	59.877	57.249	60.066	59.467	51.828	53.927	49.973	60.341	60.205	58.052	52.045	56.162	50.96	61.11	64.857	64.297	56.639	63.207	68.343	59.255	62.758	52.286	62.396	53.631	45.516	52.862	53.277	47.198	50.249	53.35
gene10080	hgfac.L	0	0	0	0	0	0	0	0	0	0	0	0	0	0	0	0	0	0	0	0	0	0	0	0	0	0.068	0	0	0	0	0	0	0	0	0	0	0	0	0	0	0	0	0	0	0	0	0	0
gene10081	<NA>	0.295	0.185	0.226	0.099	0.206	0	0.245	0.178	0.132	0.262	0.233	0.358	0.084	0.086	0.244	0.146	0.258	0.296	0.255	0.131	0.207	0.269	0.058	0.058	0.432	0.211	0.285	0.09	0.047	0.09	0.046	0.353	0.044	0.046	0	0.212	0.207	0.133	0.344	0.233	0.171	0.305	0.228	0	0.337	0.087	0.402	0.262
gene10082	sun1.L	102.924	99.827	111.808	109.216	86.933	93.225	93.353	83.388	14.127	13.632	94.803	87.739	99.943	100.41	82.849	83.078	83.078	91.851	97.729	79.151	81.91	86.437	83.912	84.806	82.377	82.435	79.087	79.9	80.562	76.514	66.671	75.639	73.37	73.669	69.413	81.964	88.591	81.186	76.863	71.054	76.919	76.372	72.572	76.124	71.426	75.391	73.798	71.965
gene10083	dhcr24.L	30.972	32.032	33.127	39.605	25.612	21.42	41.042	39.894	21.592	23.558	42.729	45.971	45.552	42.323	38.786	37.357	38.335	39.476	38.291	33.777	27.892	35.01	29.37	30.356	27.706	29.961	26.342	26.259	26.653	28.01	26.537	28.843	27.804	24.047	26.268	24.28	29.842	26.981	34.27	40.403	39.246	36.26	38.591	34.071	34.045	34.998	31.522	32.392
gene10084	<NA>	0.246	0.154	0	0	0.516	0	0.614	0.298	0	0.11	0.623	0.299	0	0.143	0.136	0.122	0	0.09	0.061	0.073	0.173	0.18	0.098	0.097	0.328	0.441	0.477	0.524	0.941	1.058	0.685	1.477	0.438	0.541	1.246	0.071	0.087	0	0	0.097	0.285	0	0.306	0	0	0.145	0	0
gene10085	shq1.L	20.146	19.79	23.685	20.006	12.597	12.97	19.63	16.938	8.04	9.331	17.493	15.943	17.323	16.64	13.654	13.604	15.21	15.106	17.605	18.658	11.905	11.585	12.669	9.98	10.446	9.552	8.487	8.264	9.245	8.597	8.019	7.666	10.248	11.555	9.24	13.433	13.512	13.662	17.321	13.393	15.43	14.167	15.86	15.98	17.016	16.174	14.008	17.996
gene10086	<NA>	30.233	32.612	40.232	41.976	15.601	14.295	36.059	32.852	18.703	17.866	35.189	33.375	34.029	37.195	40.468	38.807	46.199	41.446	45.551	48.287	20.52	19.362	19.757	18.513	16.588	18.184	32.087	31.019	30.925	30.771	31.644	27.809	37.363	31.364	31.369	34.55	45.556	34.882	35.847	31.706	35.414	34.548	33.574	34.286	33.927	34.37	33.075	32.628
gene10087	<NA>	0	0	0.103	0.216	0.056	0.055	0.022	0.097	0	0.214	0	0	0	0	0.022	0.099	0.016	0.015	0.06	0	0.479	0.147	0.382	0.253	0.214	0.345	0.062	0	0	0.025	0	0.048	0	0	0	0.023	0	0.024	0.031	0	0	0	0	0	0	0	0	0
gene10088	frmd8.L	72.529	70.886	77.041	87.846	69.758	73.154	66.11	61.87	76.387	83.879	70.414	68.531	64.445	74.348	79.825	74.171	73.875	81.134	81.978	77.088	81.708	78.103	83.064	83.114	86.997	80.404	60.975	58.496	60.403	63.857	60.219	61.579	63.358	59.371	63.8	68.077	67.791	67.077	55.33	51.033	59.05	54.931	51.292	55.475	54.241	58.323	56.394	52.975
gene10089	chaf1a.S	107.151	106.653	85.435	85.097	94.196	110.913	89.815	90.803	46.524	49.247	93.434	97.545	100.018	101.826	88.755	88.276	93.614	92.351	93.591	106.282	97.185	95.607	99.573	96.483	91.175	96.528	78.494	77.703	80.472	78.628	71.244	78.68	76.526	78.11	77.758	81.731	84.513	81.872	77.597	91.72	87.049	99.664	101.971	98.245	92.789	99.001	96.334	96.712
gene1009	bri3.S	36.848	37.159	42.822	40.14	36.943	30.377	41.389	38.727	8.564	11.483	38.85	41.503	40.288	38.201	45.284	43.571	53.931	51.39	48.526	56.348	33.236	35.134	35.26	38.267	31.884	35.328	46.364	46.677	43.744	47.231	48.253	51.473	35.049	46.446	47.419	46.805	49.238	53.288	42.277	40.839	36.246	58.593	55.867	59.919	46.54	64.604	45.803	57.293
gene10090	taf5l.S	101.541	106.037	99.875	97.136	74.581	50.838	81.055	77.023	33.941	36.2	73.631	84.315	82.281	81.454	80.315	77.932	81.322	80.449	101.184	84.411	85.038	81.234	79.181	85.382	84.235	88.046	60.887	65.968	61.738	71.485	67.03	62.889	75.553	75.353	62.777	80.213	95.454	88.433	83.047	67.29	83.048	84.501	81.463	79.208	76.889	90.802	75.296	82.414
gene10091	myrip.S	0.022	0.047	0	0	0	0	0	0	0	0	0	0	0	0	0	0	0	0	0	0	0.039	0	0	0	0	0	0.043	0.034	0.036	0	0	0	0	0	0	0	0	0	0	0	0	0	0	0	0	0	0	0
gene10092	zswim3.L	61.146	63.416	55.913	54.587	46.876	47.666	35.351	33.965	9.683	10.409	36.111	34.361	31.601	38.339	27.142	24.834	28.79	30.695	40.929	38.131	41.633	42.821	43.765	40.522	39.544	36.422	35.155	35.564	37.772	22.231	22.606	24.827	23.438	23.156	20.777	37.61	42.077	41.969	33.697	32.495	32.593	40.016	40.677	37.078	35.585	39.057	37.949	39.226
gene10093	abcf1.L	78.038	78.837	48.288	54.316	51.24	64.579	61.998	65.991	29.363	29.726	66.121	67.994	67.074	77.726	61.307	57.427	62.975	64.074	69.478	77.686	54.153	51.268	53.777	53.603	52.224	59.058	48.367	51.586	48.652	46.496	43.564	47.635	55.733	54.551	50.393	68.048	64.844	68.485	50.443	61.152	60.433	79.07	82.564	80.948	81.285	83.941	82.244	85.395
gene10094	mybl2.L	115.344	117.831	142.314	128.472	172.787	166.588	126.568	117.928	103.39	105.564	123.097	109.718	134.132	121.635	117.088	123.504	123.332	121.198	132.511	102.483	140.784	134.266	130.678	126.696	114.745	120.393	102.887	107.788	112.873	109.515	102.723	112.421	116.022	124.314	106.568	131.292	140.644	120.693	124.877	98.56	123.311	138.044	128.686	137.117	128.22	129.789	129.494	140.112
gene10095	<NA>	0	0	0	0	0.139	0	0.028	0	0	0.044	0.063	0.03	0.028	0	0.028	0.025	0	0	0	0	0.035	0	0.04	0.039	0.027	0	0.039	0.061	0	0	0	0.03	0.059	0.063	0	0	0.035	0	0	0.039	0.039	0	0	0	0	0	0	0
gene10096	krt17.L	0	0	0	0	0	0	0	0	0	0	0	0	0	0	0.094	0	0	0	0	0	0	0	0	0	0	0	0	0	0	0	0	0	0	0	0	0	0	0	0	0	0	0	0	0	0	0	0	0
gene10097	nptx1.L	0.061	0	0	0	0	0	0.084	0.138	0	0	0.048	0	0	0.089	0.084	0.038	0	0.028	0	0.045	0.107	0	0	0.12	0.122	0	0.059	0	0.049	0.047	0	0	0	0.096	0.055	0.044	0	0	0	0.121	0.118	0	0.047	0	0	0.045	0	0
gene10098	trappc3l.L	0.031	0.129	0	0	0	0	0.085	0.047	0	0	0.049	0	0.044	0.045	0.043	0	0.03	0	0	0.046	0	0	0	0	0.041	0	0	0.141	0.196	0	0	0	0	0	0	0	0.054	0	0	0.061	0	0.053	0	0.058	0	0.045	0.053	0
gene10099	<NA>	0.076	0.399	0.196	0	0	0	0.106	0.347	0	0	0	0.348	0.217	0.111	0.106	0.095	0.149	0.279	0.095	0.113	0.938	0.559	0.909	0.754	0.305	0.684	0	0	0	0	0	0.344	0	0	0	0	0	0	0.447	0	0.59	0	0	0.143	0.438	0	0.13	0
gene101	fzd3.S	2.142	1.935	1.74	2.218	2.227	1.917	1.653	1.618	8.711	8.202	1.27	1.47	1.491	1.079	1.595	1.502	0.923	1.298	1.935	1.68	1.95	2.409	1.591	2.072	1.591	1.363	0.519	0.658	0.491	1.864	1.241	1.512	1.098	0.904	1.451	0.799	0.868	0.711	1.163	1.589	1.471	1.349	1.085	1.622	1.179	1.547	1.404	1.392
gene1010	<NA>	8.086	8.561	8.319	8.627	2.438	1.607	2.258	2.324	4.432	5.235	2.469	1.274	1.587	2.577	6.54	7.346	6.402	6.983	8.672	7.221	0.94	1.107	1.2	1.011	1.365	1.292	9.792	8.431	7.895	9.65	8.134	7.821	13.109	10.298	8.459	9.978	16.288	9.791	2.177	1.29	1.754	3.936	4.081	4.588	2.98	3.397	3.177	3.605
gene10100	strada.L	22.053	24.241	29.628	26.653	20.438	16.895	18.824	17.813	9.774	11.454	20.05	16.182	19.653	19.737	17.381	16.638	17.609	18.59	20.811	25.536	17.059	18.107	14.35	12.607	15.086	15.175	18.637	15.115	15.364	16.176	14.536	16.441	18.401	15.972	18.15	20.155	25.134	20.409	19.634	16.997	17.958	19.339	16.347	17.648	16.13	16.575	19.304	18.439
gene10101	wnt5b.L	0.6	0.564	0.23	0.202	0.105	0.103	0.748	1.088	29.282	35.385	0.712	1.14	0.17	0.262	1.452	1.595	0.702	0.466	1.262	0.979	0.526	0.384	0.951	1.184	1.199	0.751	1.162	1.004	1.193	0.921	0.788	1.259	0.533	0.8	0.759	0.604	0.211	0.27	0.409	0.95	1.274	0.621	0.326	0.563	0.344	0.928	0.614	0.427
gene10102	rnf10.S	67.053	67.422	69.223	59.653	66.289	61.838	59.7	53.716	72.393	65.552	61.465	53.788	69.693	59.186	54.865	62.08	61.82	63.339	57.685	61.475	56.842	47.676	49.419	52.153	46.449	48.172	58.238	52.857	56.099	54.039	52.334	52.363	63.122	53.766	48.4	67.859	75.443	61.896	64.989	56.031	69.31	61.642	63.048	69.878	68.125	68.278	68.349	67.085
gene10103	hmgb3.L	258.521	257.346	208.31	226.692	207.871	253.311	335.123	362.965	843.27	882.418	360.381	376.404	301.376	312.835	316.91	310.23	258.124	270.771	252.113	302.539	251.621	246.419	272.489	240.768	260.515	246.132	301.093	316.905	315.483	287.387	280.711	283.914	273.896	278.774	285.668	259.656	242.267	250.291	292.886	358.239	295.638	223.922	229.005	231.213	244.722	236.24	244.572	240.969
gene10104	pdgfra.L	2.435	1.999	1.59	1.809	2.929	2.895	3.836	5.177	18.416	21.334	4.967	4.26	2.431	2.713	2.903	2.928	1.784	1.918	2.513	1.942	3.269	2.364	2.628	3.544	2.818	4.355	2.244	2.911	1.897	2.834	2.205	3.07	2.76	2.632	2.093	2.486	1.917	2.243	3.106	4.617	4.312	1.245	1.223	1.102	1.058	1.088	1.173	1.135
gene10105	mab21l3.S	0	0	0	0	0	0	0.71	0.387	21.345	26.124	0.406	0.935	0	0	0.142	0.254	0.05	0	0.254	0.076	0.18	0.375	0.305	4.147	5.942	5.043	0.497	0.312	0.245	9.439	10.535	9.681	19.361	15.35	14.819	0.074	0.36	0.154	0.2	0.507	5.048	0	0.238	0.192	0.196	0.076	0	0
gene10106	mfsd5.S	56.958	61.688	36.358	34.037	52.225	45.43	60.835	57.148	26.451	28.534	56.776	56.656	58.521	60.067	50.118	42.756	52.972	55.836	55.479	52.902	72.301	67.768	70.157	64.413	68.332	67.241	50.868	53.506	55.639	58.215	51.663	53.065	54.703	60.855	60.487	57.936	63.279	63.461	59.745	59.573	53.15	55.983	57.201	54.924	53.974	57.949	53.789	52.472
gene10107	atp5f1c.S	82.729	84.481	72.144	82.663	53.749	46.416	55.684	61.659	32.011	33.927	57.225	61.99	57.017	58.385	60.28	56.954	62.815	62.175	74.124	62.46	57.811	57.092	60.111	58.294	58.063	57.362	51.636	57.882	53.538	57.915	51.99	47.042	50.999	47.885	47.777	62.721	60.684	67.475	63.069	58.771	57.961	60.274	67.574	59.175	64.939	70.388	60.135	56.768
gene10108	fank1.L	3.455	3.874	2.538	5.815	1.786	3.971	2.303	2.61	1.146	1.566	2.024	1.652	1.271	1.769	2.035	2.136	1.683	2.455	3.481	4.269	5.946	5.496	7.352	4.039	4.772	4.233	3.47	3.405	2.85	2.65	3.459	2.205	1.895	3.008	2.658	3.77	3.933	4.513	1.744	2.278	1.976	2.316	3.471	3	2.442	3.486	1.418	1.479
gene10109	med8.S	136.531	134.005	129.265	143.463	108.433	123.747	98.029	103.523	59.668	55.75	99.548	112.062	100.87	113.124	88.71	95.404	83.238	94.633	109.835	94.371	93.945	102.499	106.908	102.019	104.74	91.915	126.61	134.852	138.351	132.618	132.866	129.456	125.83	121.543	128.381	128.479	123.041	133.31	95.708	109.913	103.054	121.954	114.246	114.673	116.822	113.627	118.838	116.832
gene1011	cavin2.L	0	0	0.045	0	0	0	0	0	0	0.078	0.056	0.054	0	0	0	0	0.034	0	0	0	0.371	0	0	0	0.141	0.378	0.068	0	0	0	0	0	0	0	0.064	0	0	0	0	0	0	0.061	0	0	0	0.052	0	0
gene10110	ndufa8.S	1.683	1.788	2.347	1.939	0.952	0.732	0.63	0.573	0.611	0.607	0.599	0.622	0.667	0.838	1.006	1.012	0.842	0.651	0.881	1.169	1.249	1.219	0.841	1.106	0.949	1.084	1.174	0.922	0.844	0.837	1.124	1.227	1.032	0.57	0.931	1.133	1.438	1.342	1.358	1.169	0.936	1.385	2.162	1.82	1.447	1.54	2.248	1.483
gene10111	rab11a.L	52.316	56.345	46.357	40.309	60.479	50.122	40.986	32.858	30.267	29.557	34.301	39.37	39.401	34.764	45.062	46.627	49.224	46.434	59.964	62.725	53.902	57.496	55.119	53.823	53.483	56.678	48.924	49.907	50.041	46.881	44.084	46.333	43.577	47.902	49.394	64.211	64.252	57.491	43.035	43.368	40.481	68.492	65.753	73.188	74.482	75.272	68.029	75.335
gene10112	polr1a.L	20.641	20.014	19.635	18.355	21.34	18.801	8.305	7.649	12.991	11.566	7.79	7.452	9.652	8.93	11.377	13.58	14.282	13.161	14.693	19.794	9.218	9.359	8.905	8.713	7.523	8.842	6.965	5.675	5.441	6.805	7.125	5.974	8.623	8.454	7.731	10.785	12.255	9.738	10.084	6.997	9.13	14.552	14.663	15.652	14.213	16.606	16.288	14.703
gene10113	thdl17.L	0	0	0	0	0	0	0	0	0	0	0	0	0	0	0	0	0	0	0	0	0	0	0	0	0	0	0	0	0	0	0	0	0	0	0	0	0	0	0	0	0	0	0	0	0	0.22	0	0
gene10114	secisbp2.L	11.247	11.351	9.636	8.953	5.39	8.227	5.956	5.615	15.276	15.316	5.939	5.645	5.496	5.265	8.6	7.012	8.137	8.095	9.528	9.396	11.248	9.223	11.159	9.837	9.847	10.842	4.735	4.757	4.573	5.22	4.532	5.275	5.473	5.947	4.168	4.975	5.462	5.224	3.579	5.107	4.946	6.068	6.215	5.796	6.383	6.566	4.433	5.739
gene10115	<NA>	3.814	3.572	1.642	1.68	1.616	2.335	1.381	1.077	1.037	0.317	1.466	1.895	1.821	1.608	1.676	2.027	1.84	2.638	2.556	3.541	3.812	3.322	2.966	4.288	4.177	3.378	0.69	0.867	1.077	1.148	0.991	0.641	0.792	1.005	0.644	0.666	0.689	0.588	1.388	1.269	1.032	1.044	0.939	0.936	1.429	1.417	1.093	0.951
gene10116	cyp2r1.S	2.284	2.605	4.757	4.111	2.223	2.563	4.484	3.45	6.061	7.561	3.444	2.662	2.713	3.014	2.717	2.823	1.293	0.922	0.919	2.284	6.89	6.115	5.365	7.542	7.709	9.021	6.582	5.813	6.336	6.842	8.367	7.4	6.369	6.242	6.139	3.052	2.705	3.347	4.963	3.992	6.15	4.393	4.445	5.577	5.777	5.239	5.792	4.817
gene10117	<NA>	6.712	6.185	8.656	8.247	6.967	5.784	4.976	4.748	2.414	2.222	5.012	4.753	5.348	5.754	5.947	6.091	5.916	6.436	7.26	7.068	5.346	5.038	4.774	4.228	4.717	5.095	4.642	5.891	5.804	5.514	5.183	5.427	6.013	5.634	5.243	6.41	6.619	5.855	5.522	4.635	4.267	6.609	5.676	5.094	5.235	5.176	5.491	4.665
gene10118	<NA>	4.265	4.464	4.61	4.146	4.702	6.13	1.946	2.054	4.447	4.679	2.389	2.083	2.111	2.519	4.017	3.62	3.023	3.249	3.836	3.636	2.567	2.697	3.016	3.209	2.399	2.493	4.794	4.787	4.529	4.848	5.062	4.945	4.955	5.227	4.911	5.46	4.531	4.97	1.697	1.724	1.772	3.325	3.602	3.204	3.238	2.823	3.129	3.368
gene10119	cfap45.L	8.648	9.026	6.399	8.533	6.783	7.303	0.577	0.42	1.166	1.159	0.439	0.422	0.296	0.455	5.714	5.195	5.853	5.552	6.483	10.813	9.072	7.743	7.842	9.863	9.435	10.37	5.178	3.801	4.64	3.782	2.95	3.226	5.244	4.68	4.579	5.689	4.879	6.462	0.406	0.206	0.804	14.125	14.425	14.393	14.051	13.653	16.156	14.698
gene1012	rttn.S	75.33	77.445	76.719	81.804	55.808	66.476	56.122	52.798	8.268	8.592	52.42	57.07	53.641	57.71	36.665	37.2	31.338	37.451	57.305	35.29	62.445	61.439	60.303	60.734	59.736	57.161	43.165	44.374	47.281	46.41	39.287	39.778	35.554	35.099	31.654	52.429	56.173	60.779	47.287	50.638	43.847	42.572	40.936	40.082	36.042	37.719	39.102	37.384
gene10120	esrrgr.L	0.55	0.502	1.231	1.734	0	0.059	0.166	0.259	0.307	0.306	0.299	0.287	0.073	0.175	0.332	0.446	0.284	0.361	0.127	0.178	0.241	0.345	0.374	0.406	0.274	0.215	0.233	0.392	0.191	0.263	0.159	0.283	0.356	0.323	0.31	0.099	0.151	0.129	0.468	0.374	0.53	1.243	1.065	0.612	1.016	1.087	0.761	1.16
gene10121	<NA>	2.907	3.289	1.656	1.263	3.664	3.427	2.596	2.125	3.652	3.296	2.522	2.849	3.407	3.057	3.164	3.571	3.454	3.376	3.247	3.532	8.682	6.685	7.097	6.622	7.019	7.58	2.761	2.652	3.013	2.848	3.216	3.232	4.11	3.645	3.388	3.099	3.657	2.871	2.337	2.634	2.534	6.045	5.029	5.03	6.193	5.579	5.817	5.637
gene10122	rbsn.L	7.41	8.603	9.482	9.224	7.966	8.153	9.707	9.293	6.655	7.361	9.327	8.48	10.543	10.426	8.49	8.119	9.404	7.817	7.592	9.331	11.905	10.536	11.119	11.091	9.395	10.78	9.297	8.363	7.75	8.344	7.761	8.212	8.37	8.351	7.791	9.188	9.377	8.636	8.457	7.207	9.051	10.671	10.949	10.85	11.429	10.955	10.049	10.559
gene10123	<NA>	2.26	2.691	2.77	3.107	5.663	4.28	2.247	1.491	0.214	0.85	1.108	1.886	1.717	2.084	2.421	1.81	2.326	1.978	2.912	3.115	3.46	3.374	3.153	2.888	2.925	2.789	2.836	2.468	2.076	1.611	1.967	3.005	2.733	1.896	2.76	1.784	2.907	3.153	1.301	1.7	1.536	2.962	3.996	3.283	2.977	3.234	2.17	3.736
gene10124	<NA>	0.013	0.027	0.033	0	0	0.045	0.036	0.02	0.146	0.145	0.021	0.02	0.018	0.019	0.072	0.032	0.013	0.024	0.064	0.039	0.068	0	0	0.026	0.035	0.116	0.076	0.119	0.083	0.02	0.101	0.078	0.077	0.122	0	0.037	0	0.059	0.076	0.026	0.075	0	0.081	0	0	0	0	0.023
gene10125	pmm2.S	0.98	1.586	0.063	0.082	0	0	0.237	0.222	0.494	0.436	0.271	0.112	0.035	0.285	0	0.152	0.072	0.09	0.121	0.073	0.559	0.358	0.68	0.677	0.424	0.57	0.57	0.708	0.897	0.376	0.606	0.624	0.363	0.576	0.487	0.282	0.947	0.552	0.095	0.242	0.189	0.042	0.152	0.046	0.047	0.072	0.084	0.087
gene10126	nktr.S	60.843	60.541	58.845	59.863	58.117	66.147	62.856	59.397	50.153	56.867	60.923	62.235	66.275	67.069	50.991	51.13	56.363	52.302	55.737	54.3	44.463	45.069	43.447	43.585	41.998	46.236	44.509	49.507	46.144	44.975	39.999	45.261	48.571	50.056	46.969	49.576	54.123	49.811	57.553	53.915	55.069	67.181	66.56	63.183	63.491	63.23	62.816	66.796
gene10127	<NA>	0	0	0	0	0	0	0	0	0	0	0	0	0.034	0	0.101	0.03	0.095	0	0.03	0.072	0	0	0	0	0	0	0	0	0.039	0	0	0	0	0.038	0	0	0	0	0	0	0	0	0.038	0	0	0.036	0.041	0.043
gene10128	pip4k2a.S	8.289	8.073	15.301	15.552	6.298	6.274	10.449	9.237	3.595	3.353	9.219	9.762	10.834	10.716	7.529	9.087	9.003	9.08	8.789	8.98	4.362	4.989	4.872	3.73	4.791	5.466	7.104	8.559	7.486	8.984	6.457	8.436	8.062	9.046	7.703	8.642	10.063	8.598	8.885	8.099	9.358	8.405	9.277	9.759	9.416	9.399	10.249	9.608
gene10129	meis3.L	0	0	0	0	0.142	0	0.338	0.492	87.677	84.53	0.644	0.866	0.058	0	0.169	0.201	0.119	0.223	0.151	0.845	0.214	0.074	0.242	0	0	0.073	0.552	0.062	0.453	0	0.063	0.122	0	0	0	0	0	0	0	0.081	0	0	0.316	0.229	0.078	0.06	0.069	0
gene1013	pagr1.L	29.105	30.378	25.26	25.648	42.593	41.781	32.785	32.043	23.011	22.874	32.09	29.286	36.74	29.789	20.818	25.197	31.395	24.661	24.178	37.435	37.022	38.424	35.283	35.311	34.236	38.906	31.47	28.751	28.915	27.741	33.043	28.062	31.263	31.942	28.023	44.062	35.474	32.927	34.318	36.136	31.011	36.235	32.587	29.614	34.869	31.632	26.754	33.796
gene10130	<NA>	0.328	0.343	0	0	0	0	0.353	0.165	8.327	7.791	0.288	0.111	0.052	0	0.101	0.271	0	0	0	0.054	0.512	0.4	0.289	0.648	0.34	0.718	0.848	0.61	1.161	1.007	0.958	0.765	0.54	0.629	0.725	0.21	0.577	0.383	0.071	0.794	0.563	0.126	0	0	0.07	0	0	0
gene10131	cenpj.L	97.265	95.868	75.087	73.269	85.293	108.818	79.436	71.602	23.715	26.484	72.631	70.244	75.812	78.967	67.586	63.239	65.724	65.534	91.094	79.927	82.967	78.353	76.202	78.27	77.168	81.334	64.191	63.569	64.29	59.951	52.511	60.387	54.337	55.792	57.255	75.579	86.376	80.41	65.959	66.966	71.416	92.745	88.635	91.671	85.63	86.97	86.271	92.842
gene10132	eif3g.S	83.712	78.832	56.524	55.752	35.423	33.312	69.87	64.949	58.91	48.034	71.264	67.694	64.92	67.425	73.069	79.351	97.977	79.541	89.353	98.533	40.968	48.112	52.539	43.366	40.837	46.366	84.395	77.19	84.375	85.139	80.717	76.228	99.991	86.684	92.242	100.588	92.817	97.798	72.173	59.479	67.558	77.826	74.422	89.677	77.903	75.78	72.752	78.9
gene10133	upk1a.L	47.865	45.595	47.139	50.298	36.634	30.624	50.407	49.578	120.202	114.957	48.427	53.812	53.312	52.002	42.48	42.827	52.127	48.121	54.524	50.978	43.789	43.259	47.302	48.128	48.573	46.808	50.898	50.677	53.774	54.336	49.637	54.254	58.406	56.01	59.925	53.908	56.071	45.869	51.777	50.537	57.285	77.445	74.265	78.881	74.193	78.089	73.104	80.561
gene10134	msh2.L	78.505	83.14	67.984	67.398	58.444	53.026	50.289	46.925	42.732	35.455	46.771	47.346	51.507	52.92	57.274	60.396	70.94	61.945	65.362	80.038	65.395	61.787	59.905	58.107	59.027	63.373	53.24	57.154	53.835	55.158	53.828	53.159	58.743	59.095	57.436	65.661	76.211	62.161	52.22	49.673	55.86	43.091	46.757	44.102	43.747	45.785	45.646	41.291
gene10135	pkig.L	1.996	2.265	1.871	2.5	0.85	0.88	1.189	1.052	0.13	0.284	1.248	1.181	1.597	1.351	1.396	1.521	1.447	1.76	2.267	2.151	1.892	1.527	2	1.923	1.839	1.701	1.933	1.958	1.624	1.673	1.99	1.443	1.22	1	1.258	1.934	1.875	1.498	1.107	1.813	1.075	1.84	1.889	1.784	1.838	1.879	1.879	1.857
gene10136	nit1.S	4.302	3.578	6.451	5.429	4.923	3.939	4.558	2.742	1.354	2.093	3.614	3.471	2.861	3.325	3.531	4.487	7.203	4.298	5.318	5.78	4.242	3.439	3.195	4.109	4.297	3.966	4.035	3.985	2.993	4.02	4.672	4.733	4.577	5.477	5.463	6.664	7.083	5.245	4.318	4.653	3.632	8.108	6.563	6.554	5.259	7.521	6.987	8.845
gene10137	cck.L	0	0	0	0	0	0	0	0	0	0	0	0	0	0	0	0	0	0	0	0	0	0	0	0	0	0.134	0.145	0	0	0	0	0	0	0	0	0	0	0	0	0	0	0	0.232	0	0	0	0	0
gene10138	pla2g1b.L	0	0	0	0	0	0	0.264	0.288	0	0	0	0	0	0	0	0	0	0	1.649	0.283	0.334	0.697	0.755	0.376	0	0	0.369	0	0	0	0	0	0	0	0	0	0	0	0	0	0	0.328	0.295	0	0.364	0	0	0
gene10139	myh6.L	0	0	0	0	0	0	0	0	0.537	0.821	0	0.028	0	0	0	0	0	0	0	0	0.032	0	0	0	0	0	0	0	0	0	0	0.028	0	0	0	0.027	0	0	0	0.036	0	0.032	0	0	0	0	0	0.033
gene1014	cacna1s.S	1.366	1.238	0.184	0.182	0.063	0	1.219	1.412	0.563	0.44	0.967	1.72	2.041	1.229	0.075	0.067	0.175	0.296	0.2	0.267	0.095	0.197	0.427	0.177	0.048	0.354	0.383	0.301	0.286	0.193	0.305	0.189	0.106	0.056	0.39	0.207	0.032	0.432	1.645	1.422	1.527	1.394	0.92	1.517	0.961	0.635	1.042	1.758
gene10140	gstm1.S	105.849	106.609	127.265	140.692	106.121	102.244	99.257	112.598	52.921	46.067	97.65	100.193	87.434	106.388	98.092	101.14	99.007	101.608	124.698	107.468	90.543	65.882	85.336	69.334	72.524	69.256	111.895	116.594	131.15	126.852	120.052	109.938	128.125	94.957	104.816	131.698	135.828	154.994	111.988	117.821	106.835	108.612	105.603	90.377	104.66	107.849	94.323	99.794
gene10141	rasa4.S	0	0	0	0	0	0	0	0.045	0.335	0.067	0.047	0	0	0	0.041	0	0	0	0	0	0	0	0.059	0.059	0.04	0.268	0	0	0.095	0.046	0.046	0.224	0.089	0.094	0	0	0	0	0.058	0.059	0	0	0	0.056	0	0	0	0
gene10142	serbp1.S	45.021	44.535	42.633	37.213	31.899	31.325	51.403	50.647	101.928	104.595	52.041	52.08	58.794	54.892	47.608	55.873	55.518	48.949	54.497	53.322	26.859	30.256	26.445	29.114	25.494	23.87	79.837	80.997	77.69	80.279	83.528	82.3	90.551	94.515	84.92	101.49	110.828	93.767	51.693	40.77	59.026	29.596	31.675	31.543	30.809	30.48	31.318	34.826
gene10143	<NA>	0	0.041	0.249	0.131	0.407	0.537	0.215	0.118	4.18	4.674	0	0.118	0.11	0.17	1.775	0.962	0.644	1.493	1.684	1.789	0.341	0.284	0.925	0.46	0.363	0.417	0.301	0.532	0.309	0.418	0.12	0.175	0.058	0.244	0.351	0.335	0.342	0.117	0	0.154	0	0.671	0.362	0.949	0.223	0.401	0.53	0.692
gene10144	trim14.S	3.938	4.639	13.894	11.929	6.574	6.109	4.711	4.207	1.133	0.876	4.849	4.486	4.351	5.73	9.878	10.641	11.619	11.616	11.685	11.511	3.107	3.444	4.458	2.663	4.083	2.817	10.023	9.45	10.693	8.93	10.645	9.061	9.953	9.081	8.941	11.196	12.993	11.27	4.326	4.061	3.583	7.466	6.322	7.069	7.999	6.834	6.088	6.603
gene10145	<NA>	2.968	3.305	4.558	4.263	3.727	3.411	2.629	2.033	0.089	0.528	2.504	2.044	3.594	3.225	3.611	3.572	2.776	3.037	4.404	3.932	10.061	6.293	6.585	6.635	7.379	7.713	7.971	7.159	6.043	8.255	5.441	6.997	7.031	7.195	6.862	7.791	8.897	7.424	2.62	2.427	1.681	4.502	4.601	5.492	3.172	6.41	3.709	4.504
gene10146	mtfr1l.L	10.523	10.626	11.002	11.916	10.642	11.305	13.458	13.458	4.929	4.827	13.34	14.001	15.025	14.361	10.376	11.355	9.981	10.344	11.417	10.136	13.586	12.702	15.319	14.383	12.906	14.673	8.783	8.655	8.59	8.583	8.316	8.702	9.347	8.105	7.956	9.869	8.711	9.132	12.895	12.423	12.722	8.941	8.699	8.505	8.438	8.816	8.507	9.922
gene10147	scml2.S	41.727	41.941	29.243	29.356	31.088	33.221	24.75	23.334	28.382	28.638	25.571	23.662	23.403	25.686	25.488	26.933	26.865	25.977	30.891	21.742	37.394	37.345	34.895	34.743	31.931	32.008	25.152	25.273	26.414	27.806	22.532	25.166	26.39	26.86	23.939	29.498	31.139	28.234	20.688	20.302	22.789	29.374	27.686	29.642	30.239	29.021	29.304	28.074
gene10148	<NA>	18.96	17.182	23.9	20.248	16.665	17.52	17.855	16.833	17.155	16.474	19.612	17.715	22.374	20.666	22.07	24.486	26.362	21.31	23.521	25.696	27.643	26.672	25.984	26.043	25.51	27.376	15.477	14.229	14.785	15.655	14.827	15.001	15.433	16.098	15.219	19.94	18.575	16.392	22.324	15.936	20.456	28.296	28.477	31.156	29.759	27.692	27.978	29.544
gene10149	nsun4.S	15.325	15.655	13.978	15.638	19.334	20.234	19.405	18.227	5.837	5.44	16.373	14.734	16.194	20.874	17.131	18.844	17.392	21.002	24.591	25.381	22.58	24.283	20.991	19.775	28.443	21.28	18.469	18.092	17.245	20.754	24.301	22.839	20.516	20.312	22.083	26.705	25.197	27.033	17.774	18.863	15.419	20.23	19.836	16.968	21.78	18.003	21.809	23.918
gene1015	<NA>	29.499	27.376	29.976	30.549	41.901	30.831	18.012	15.427	11.499	13.658	17.521	21.795	17.52	17.673	21.684	20.791	28.803	25.06	26.403	22.264	33.58	30.614	31.728	32.907	29.952	32.458	22.746	20.899	21.125	21.393	22.576	27.998	27.566	28.448	26.517	37.878	33.288	32.347	16.63	19.008	13.525	22.428	20.274	26.783	22.671	24.959	23.541	26.228
gene10150	<NA>	0	0	0	0	1.692	1.929	0.568	0.282	0	0	0.118	0.34	0.529	0.597	0	0	0	0	0	0.055	0	0	0	0	0	0	0	0.057	0	0	0	0	0	0	0	0	0	0	0.145	0.074	0.072	0	0	0	0	0	0	0.066
gene10151	irf1.L	0.053	0	0	0	0.187	0	0	0.081	0	0.119	0.085	0.244	0.152	0.078	0.074	0.397	0	0	0.066	0.159	0.563	0.88	0.424	0.316	0.57	0.956	0.104	0.407	0.085	0.246	0.248	0	0.554	0.168	0.29	0.077	0	0	0.208	0.106	0.619	0.184	0.249	0.1	0	0.079	0.456	0
gene10152	sox3.L	371.246	347.751	468.419	386.16	483.47	388.125	427.522	425.129	708.078	739.64	436.409	412.597	403.587	369.387	462.687	495.432	487.391	419.656	471.278	530.184	369.755	330.378	308.803	310.514	300.042	337.66	405.169	386.237	376.651	320.48	365.034	371.616	389.403	412.617	362.32	441.035	414.461	353.011	534.308	437.355	495.076	477.06	522.115	571.572	574.104	514.314	547.919	566.991
gene10153	XB5909790.S [provisional]	19.938	21.647	13.203	15.486	12.401	19.948	13.991	14.482	18.018	18.919	12.624	14.719	12.168	12.78	10.843	11.161	9.236	11.114	15.255	10.336	14.85	12.932	13.464	15.331	16.897	15.706	13.298	13.829	12.419	13.579	13.406	11.542	15.172	13.001	14.605	13.623	11.142	10.723	14.522	14.546	15.945	7.629	7.725	6.798	8.116	8.314	7.544	7.748
gene10154	fbxl7.L	0.109	0.114	0	0	0	0	0	0	0	0	0	0	0	0	0	0	0	0	0	0	0.096	0	0	0	0	0.097	0	0	0	0	0	0	0	0	0	0	0	0	0	0.108	0	0	0	0	0	0	0	0
gene10155	fntb.S	17.563	17.797	25.52	23.093	15.717	14.21	19.524	19.262	8.765	9.568	17.411	22.671	22.27	20.003	29.698	28.294	30.453	30.477	26.683	31.202	23.609	26.903	25.458	24.59	25.571	25.726	22.112	24.129	25.288	25.051	24.755	23.782	26.569	25.958	28.806	25.088	23.785	24.164	16.447	20.963	21.939	32.65	34.482	30.967	30.097	31.286	31.498	31.276
gene10156	marveld2.L	31.537	30.868	29.858	29.128	20.946	19.552	34.521	33.236	34.824	36.8	33.333	31.328	36.535	34.577	28.516	27.923	31.029	30.605	32.002	31.191	32.719	31.202	29.621	30.886	28.356	28.667	25.538	26.729	25.752	26.998	24.158	25.198	27.92	28.509	25.696	27.633	30.743	27.828	29.799	28.334	29.468	29.221	27.617	26.865	26.741	27.709	26.285	30.186
gene10157	tesk2.S	65.732	68.834	64.406	64.315	64.266	72.594	64.57	62.015	11.525	11.526	63.54	62.631	71.01	68.979	57.41	55.381	56.383	61.917	62.637	50.734	73.888	70.413	69.217	64.278	65.829	65.721	68.451	71.769	67.481	74.016	63.945	72.771	69.452	72.77	66.028	66.706	73.199	71.903	54.752	54.949	57.783	57.917	51.669	54.121	53.239	54.378	53.594	54.03
gene10158	serpine1.L	0	0	0	0	0	0	0	0	0.161	0	0	0	0	0	0	0	0	0	0	0	0	0	0	0	0	0.128	0	0	0	0	0	0	0	0	0	0	0	0	0	0	0	0	0	0	0	0	0	0
gene10159	<NA>	1.773	1.826	3.66	3.819	0	0.081	1.472	1.964	17.825	19.35	1.72	1.4	0	0.206	2.353	2.718	1.359	1.08	1.987	1.227	0.58	0.691	1.264	0.979	1.448	1.057	3.57	4.42	3.196	5.003	4.126	4.285	5.704	5.334	4.568	2.717	3.487	2.979	1.565	1.075	1.916	5.336	5.422	4.654	4.692	5.22	4.35	4.329
gene1016	pik3c2a.L	81.324	80.292	97.809	86.747	93.374	82.095	66.77	67.01	81.488	80.443	71.496	61.485	80.506	70.261	82.659	92.381	102.053	86.836	88.088	95.7	74.709	66.753	66.371	66.27	62.9	65.676	61.946	62.086	62.148	61.114	61.181	64.558	70.298	72.604	60.856	78.406	87.115	66.934	85.113	58.701	73.764	116.551	117.193	120.122	119.258	120.899	118.908	118.686
gene10160	lamtor2.S	39.674	36.543	43.562	34.344	34.978	28.507	40.908	35.751	19.881	19.959	43.545	36.611	44.188	42.236	37.095	36.104	39.164	34.477	38.282	34.954	32.541	35.046	26.486	27.586	24.601	22.806	25.382	28.349	25.046	29.007	26.224	26.491	29.563	27.433	30.185	35.644	34.143	33.132	48.292	31.317	40.748	48.816	43.083	38.766	40.962	40.798	40.473	48.179
gene10161	rela.L	50.353	54.728	56.44	50.867	57.691	64.199	44.717	38.503	33.906	34.048	44.268	39.998	47.433	43.867	44.243	46.852	51.945	47.517	56.103	72.198	43.868	37.696	35.894	31.329	30.037	32.813	39.421	35.985	38.512	27.969	31.503	31.886	34.247	32.989	33.214	43.986	47.195	40.208	44.133	40.11	37.728	49.833	53.601	52.635	54.522	41.269	43.821	43.056
gene10162	hat1.L	62.609	65.314	49.416	54.415	48.981	53.402	59.202	60.95	47.205	48.638	61.124	65.346	68.87	67.657	52.796	53.336	49.172	59.59	57.681	46.071	62.034	63.203	59.538	64.442	68.613	62.386	47.053	59.359	57.31	58.095	56.747	57.352	55.485	49.418	52.726	48.408	50.299	55.314	54.076	63.04	61.4	39.38	38.279	34.304	32.971	33.553	37.206	36.198
gene10163	marchf4.L	0.033	0.103	0.126	0.11	0	0	0.045	0	0	0	0	0.05	0.093	0.095	0.045	0.041	0.032	0.06	0	0.146	0	0	0.13	0.065	0.087	0	0.063	0.1	0	0.05	0	0.147	0.049	0.154	0.178	0	0	0.049	0.064	0.065	0.19	0.17	0.051	0	0	0.097	0.112	0
gene10164	sbk1l2.L	0.036	0.037	0	0	0	0	0	0	0	0	0	0	0	0	0	0	0	0	0.044	0	0.062	0	0	0	0.047	0	0	0	0	0	0.055	0	0	0	0.064	0	0	0	0	0	0	0	0	0	0	0	0	0.126
gene10165	masp1.S	0.121	0	0.062	0	0	0	0	0.147	0.054	0	0	0.111	0	0.141	0	0.03	0.071	0.089	0	0.072	0	0	0.096	0	0.032	0	0.094	0.074	0.039	0	0	0	0	0	0	0.035	0	0	0	0	0.14	0.042	0.038	0.045	0	0.143	0	0.043
gene10166	uxs1.S	27.867	26.985	27.564	28.509	22.602	26.457	29.508	30.54	14.303	16.186	32.074	35.541	33.58	34.752	28.804	28.817	28.268	31.258	32.647	30.889	27.878	27.808	27.293	31.187	29.424	29.42	34.22	34.46	34.474	34.802	33.921	33.533	32.775	34.104	32.114	30.92	34.918	35.51	28.502	27.864	31.075	25.156	24.988	26.294	24.016	24.78	23.894	26.31
gene10167	<NA>	5.759	5.515	8.407	6.68	5.753	4.915	6.036	5.913	9.759	9.515	5.704	5.096	7.18	7.037	7.653	8.329	8.252	7.254	8.433	6.632	4.264	4.087	4.264	4.301	3.611	4.299	4.872	5.142	5.025	5.231	5.139	4.901	5.463	5.608	4.443	5.342	5.794	4.573	6.15	4.921	5.504	7.901	7.886	7.497	8.216	8.315	8.527	7.855
gene10168	cyp2e1.L	5.95	6.364	1.07	0.993	9.948	11.527	0.408	0.149	1.32	0.766	0.389	0.299	0.279	0.286	1.564	0.304	0.766	0.674	1.52	0.802	7.672	7.548	7.403	8.34	8.447	6.77	0.381	0.448	0.235	1.433	0.304	0.442	0.291	0.385	0.266	0.636	0.345	0.59	0.574	0.292	0.095	6.356	9.221	5.44	6.569	7.964	8.966	8.919
gene10169	fam162a.L	4.436	4.511	0	0	0	0	0	0	0	0	0	0	0	0	0	0	0	0	0	0	0	0	0	0	0	0	0	0	0	0	0	0	0	0	0	0	0	0	0	0	0.439	0	0	0	0	0	0	0
gene1017	mybbp1a.L	131.44	126.925	109.104	109.686	106.573	119.707	139.965	134.3	110.679	108.06	138.103	137.963	154.011	145.282	123.613	125.411	132.729	125.974	122.542	138.706	104.769	101.416	99.675	97.937	99.375	107.947	91.128	96.508	92.479	99.252	87.419	93.431	98.238	99.53	103.101	107.5	113.308	107.925	119.87	118.922	122.773	131.684	131.692	128.667	129.351	126.151	132.088	130.644
gene10170	hp1bp3.L	10.59	10.244	18.069	10.184	16.237	11.635	14.657	12.718	49.566	52.466	12.945	13.434	16.954	13.038	15.393	16.689	17.649	14.389	15.155	20.936	8.977	8.649	9.682	8.722	10.126	11.722	13.597	10.378	10.119	9.4	13.482	11.624	14.07	14.712	11.77	13.322	10.356	12.399	18.124	12.813	17.969	22.998	25.793	30.772	26.8	22.732	25.516	29.386
gene10171	fut6.2.L	0.378	0.179	0.044	0	0.36	0.119	0.048	0.156	1.385	1.53	0.163	0	0	0.15	0.19	0.17	0.235	0.157	0.255	0.102	0.06	0.189	0.204	0.136	0.092	0.123	0.067	0.105	0.055	0.105	0	0	0.051	0	0.186	0	0	0.103	0.067	0.068	0	0.237	0.48	0.709	0.525	0.709	1.055	0.856
gene10172	cdc14a.L	2.375	2.057	2.552	2.478	0.414	0.491	1.15	1.005	3.507	5.071	1.052	0.83	1.078	1.313	0.591	0.587	0.301	0.629	0.47	0.775	0.583	1.172	1.787	1.405	1.423	1.401	0.598	1.011	0.718	1.165	0.807	0.747	0.668	0.67	0.686	0.887	0.918	1.176	1.109	1.315	1.512	0.491	1.067	0.668	0.77	1.468	0.728	1.225
gene10173	slc7a7.S	0.37	0.145	0.71	1.245	0.161	0.159	0.128	0.07	0.828	0.617	0	0.07	0.066	0.067	0.128	0	0.27	0	0.171	0.069	0.486	0.338	0.183	0.729	0.431	0.331	0.627	0.632	0.294	0.354	0.286	0.139	0.274	0.217	0.334	0.399	0.325	0.555	0.27	0.366	0.089	0.239	0.215	0.173	0.441	0	0.315	0.247
gene10174	<NA>	0	0	0.056	0.146	0.303	1.197	105.865	103.954	37.885	38.916	104.425	106.952	0.431	0.316	82.046	75.239	0.042	0	12.076	12.873	62.484	51.409	60.881	56.508	47.117	48.977	78.854	93.178	87.969	60.655	57.464	73.431	63.561	41.226	43.748	1.871	2.44	2.019	89.75	105.177	74.989	8.23	9.823	7.978	8.782	4.218	5.178	3.011
gene10175	disp1.L	63.411	66.839	62.79	62.289	44.87	41.629	70.937	60.659	16.43	17.502	64.681	59.694	76.748	65.92	59.537	60.11	70.109	61.332	65.692	53.411	51.807	51.566	49.401	45.557	42.883	46.978	48.295	47.903	48.676	52.458	46.144	55.518	54.529	58.64	49.68	56.73	66.001	55.087	60.166	51.085	63.048	61.873	61.381	63.647	58.673	58.876	59.421	61.217
gene10176	aifm3.L	7.405	9.723	6.989	8.796	8.649	7.162	8.997	9.72	3.074	4.1	8.585	7.94	7.75	9.848	6.254	7.042	7.475	6.796	6.711	6.608	2.115	2.021	1.527	3.238	1.963	1.977	5.515	3.922	4.264	4.163	4.813	4.066	3.572	4.673	4.478	5.489	6.826	6.838	6.654	8.549	6.338	14.668	16.774	12.944	14.388	14.652	14.846	14.3
gene10177	macc1.S	2.057	2.211	2.632	6.819	13.812	12.17	2.379	1.716	0.343	0.615	1.796	1.119	1.132	2.59	1.4	0.987	1.166	1.767	2.619	0.637	1.668	1.01	3.891	3.572	1.799	1.482	10.937	9.659	10.888	8.521	11.616	11.681	8.362	11.449	9.812	9.262	9.488	11.147	1.195	2.428	1.837	6.93	9.134	7.713	5.741	7.005	5.074	6.332
gene10178	araf.S	45.023	46.574	52.064	41.306	51.997	42.425	32.818	30.937	22.164	23.443	35.18	30.849	38.616	34.645	45.694	47.948	57.279	49.024	51.786	63.935	36.893	34.314	35.277	32.098	31.8	33.452	35.585	37.566	38.352	34.884	38.686	43.721	44.288	44.946	42.463	52.375	54.119	43.488	37.136	27.703	36.947	60.003	62.336	69.67	66.701	66.681	61.49	64.879
gene10179	c1qtnf4.L	0.388	0.511	1.23	0.908	0.471	0.523	0.56	0.306	0.415	0.525	0.373	0.512	0.407	0.368	0.63	0.625	0.542	0.616	0.772	0.8	0.917	0.863	0.835	1.198	0.719	0.965	0.947	1.128	0.805	1.112	1.068	0.606	0.924	1.11	1.127	0.945	1.185	1.215	0.558	0.534	0.228	0.378	0.471	0.759	0.901	0.571	0.517	0.45
gene1018	<NA>	0	0	0	0	0.623	0.123	0	0	0.24	0.398	0	0.054	0	0	0.198	0.486	0.418	0.229	0.53	0.318	0	0.065	0.142	0	0	0	0.831	0.978	0.284	0.274	0.718	0.857	0.423	0.448	0.646	0.616	1.13	0.375	0	0	0	0	0.055	0	0.068	0	0	0
gene10180	trim23.S	19.564	19.677	19.572	20.352	15.302	15.533	18.325	18.928	12.558	14.155	17.752	18.19	18.619	20.816	21.42	21.253	24.064	21.015	21.597	28.772	23.489	20.874	27.479	20.422	22.633	20.14	19.134	19.586	19.928	17.821	16.421	18.653	18.197	21.43	19.486	22.488	22.35	21.172	16.85	18.917	18.002	22.954	24.686	25.051	26.324	27.932	23.976	22.209
gene10181	ccpg1.L	18.903	18.147	16.083	20.905	13.306	16.017	21.525	21.354	7.825	7.833	20.729	23.066	21.479	24.905	22.449	19.74	22.488	22.475	21.042	21.681	14.104	15.105	15.646	13.118	12.733	14.341	22.73	21.039	22.52	23.29	21.227	20.993	25.378	19.275	21.463	24.173	21.344	22.42	18.423	19.636	22.749	15.55	13.758	14.078	15.634	14.257	13.251	13.871
gene10182	rnpep.S	0	0	0	0	0	0	0	0	0	0	0	0	0	0	0	0	0	0	0	0	0	0	0	0.101	0	0	0.1	0	0	0.079	0	0.077	0	0	0	0	0	0	0	0	0	0	0	0	0	0	0	0
gene10183	<NA>	0.207	0.324	0.529	1.044	0.721	0	0.286	0	0	0.23	0.327	0	0.293	0	0.286	0.256	0.604	0.094	0	0.46	0	0	0.205	0	0.138	0.554	0	0.628	0	0.159	0.479	0	0	0.648	0.187	0.297	0.908	0.31	0	0.613	0	0	0.16	0	0.789	0	0.881	0
gene10184	<NA>	0	0	0	0	0	0	0.076	0	0	0	0.044	0	0	0	0	0	0	0	0	0	0	0	0	0	0	0	0	0	0	0	0	0	0	0	0	0	0	0	0	0	0	0	0	0	0	0	0	0
gene10185	mgp.L	0.644	0.168	0.206	0	0	0	0	0	0.36	0	0	0.979	0.686	0	0	0	0	0	0.199	0.239	0	0	0	0	0.214	0	0	0	0.256	0	0	0	0	0	0	0	0	0.242	0.627	0	0	0	0	0	0.922	0	0	0
gene10186	pik3r6.L	1.471	1.786	0.175	0.115	0.119	0	2.273	2.326	1.225	1.142	2.219	1.975	2.767	2.041	0.284	0.085	0.3	0.25	0.296	0.203	0.06	0.188	0.203	0.135	0.046	0	0.133	0.104	0.109	0	0	0.051	0.101	0.161	0	0.295	0.06	0	2.598	2.707	1.057	0.059	0.053	0.128	0	0.101	0	0.061
gene10187	polrmt.L	60.516	62.414	74.542	72.409	83.988	81.205	96.543	90.302	19.565	19.143	96.186	83.078	100.509	90.053	71.197	78.253	86.603	70.658	78.021	77.414	81.238	75.157	76.108	75.288	69.057	77.92	31.567	30.775	26.367	28.512	24.795	29.299	26.624	31.251	27.696	31.864	40.109	32.324	83.657	76.809	85.709	100.868	93.492	96.258	99.223	98.074	94.143	99.321
gene10188	ermp1.L	34.608	34.133	34.209	36.332	21.706	24.008	38.641	36.52	22.64	22.459	38.966	38.356	37.514	40.128	31.606	34.069	31.591	35.524	42.027	29.28	37.294	39.456	40.251	39.993	38.196	40.495	32.915	34.074	31.614	36.002	34.231	33.013	36.475	35.326	31.27	35.158	42.564	35.986	34.242	33.324	34.399	32.247	29.427	32.072	29.206	29.606	32.678	28.004
gene10189	ocel1.2.S	0.147	0.276	0.714	0.395	1.844	2.532	1.382	1.331	0.657	0.327	1.487	1.74	1.584	1.838	0.162	0.654	0.114	0.268	0.291	0.261	0.618	0.698	1.338	1.217	0.861	1.576	0.74	0.714	0.888	0.631	0.726	0.704	0.565	0.552	0.477	0.506	0.671	0.793	0.858	1.394	1.701	5.366	5.054	3.636	4.709	4.455	4.655	3.657
gene1019	stag1.L	115.55	115.513	112.22	110.495	105.245	118.474	111.9	106.254	79.222	86.693	109.422	104.177	122.472	120.321	101.109	103.899	110.322	107.821	105.781	112.09	89.099	85.256	87.352	84.599	76.968	85.898	89.255	90.725	86.976	92.555	82.987	94.364	90.693	97.563	86.051	93.747	95.78	92.392	93.564	84.14	97.089	105.575	101.829	102.466	101.861	100.921	103.789	108.788
gene10190	exoc1.S	35.357	35.908	40.881	43.572	35.093	38.22	45.074	45.133	29.076	29.063	46.567	50.952	51.423	51.2	36.028	34.159	34.05	37.9	36.815	34.96	30.262	33.288	31.547	31.551	32.386	30.479	38.182	44.541	40.766	41.575	37.046	38.543	43.061	40.837	37.805	39.464	47.398	42.179	42.329	42.344	42.611	31.72	31.372	32.772	29.529	31.803	29.779	30.567
gene10191	<NA>	0.598	0.702	0	0	2.216	2.577	0.052	0.056	1.589	2.328	0	0.114	0.318	0	0.258	0	0.036	0.102	0.139	0.72	0.59	3.074	1.925	0.958	0.995	0.2	0	0	0	0	0.058	0.112	0	0	0	0	0	0	0.437	0.074	0	0.966	3.475	0.701	2.211	1.266	0.573	2.326
gene10192	rnf144b.L	13.689	13.105	12.181	14.341	10.04	11.486	12.328	13.936	3.144	2.874	14.051	12.565	13.636	14.245	12.44	12.524	11.194	13.811	13.058	12.601	16.927	16.444	15.803	16.897	16.631	13.94	10.577	11.473	11.68	12.479	12.253	11.206	11.408	11.508	12.116	11.723	12.379	12.651	10.898	11.251	11.942	9.413	9.555	8.543	9.256	8.776	11.007	9.391
gene10193	<NA>	0.34	0.387	0.198	0.104	2.694	3.621	0.171	0.14	0.069	0.893	0.293	0.235	0.088	0.27	0.342	0.076	0.662	0.452	0.42	0.229	0.271	0.282	0.184	0.244	0.329	0.221	0.06	0	0.098	0	0.048	0.139	0.046	0.048	0.056	0	0.054	0.046	0.06	0.306	0.179	2.769	2.49	2.781	2.418	2.411	2.422	1.978
gene10194	fgf7.L	6.476	6.043	1.756	1.732	1.197	0.591	2.968	2.462	0.192	0	1.492	2.28	2.86	3.12	1.127	0.901	0.752	1.332	2.757	1.653	0.677	0.549	0.765	0.761	0.914	0.843	1.661	2.216	2.046	2.302	1.987	2.377	2.032	0.538	1.394	1.849	2.711	2.445	2.004	2.036	2.152	1.33	1.529	1.769	1.228	1.452	1.389	1.144
gene10195	atf1.S	90.647	91.764	120.787	112.941	116.587	111.494	108.581	105.717	101.861	107.619	109.053	109.429	122.564	106.589	98.879	104.582	97.208	101.371	104.835	81.477	117.258	109.979	105.728	117.132	104.698	102.781	99.543	110.963	104.084	106.663	105.542	112.224	114.005	108.471	96.753	111.072	117.175	102.73	103.46	90.291	108.347	106.09	96.275	105.209	99.417	97.266	101.091	97.369
gene10196	spag7.L	162.652	160.452	179.466	145.458	128.7	95.484	121.818	112.897	122.084	124.875	119.062	111.385	133.864	117.377	186.84	189.81	230.073	207.356	199.823	236.332	135.08	129.77	128.873	146.828	120.186	148.565	142.907	130.687	142.659	138.413	146.43	151.784	149.293	161.09	149.224	163.058	157.516	143.092	113.627	120.956	134.54	200.219	202.102	212.114	236.794	205.265	197.022	230.227
gene10197	<NA>	22.923	23.082	84.795	88.386	54.395	52.145	73.956	74.703	55.322	60.447	69.29	72.014	47.034	48.415	28.304	26.661	18.343	21.109	33.821	25.133	52.852	51.615	48.713	38.781	33.792	39.308	59.794	58.71	65.663	45.757	42.134	47.903	35.635	40.5	36.125	35.86	41.816	39.093	60.008	68.496	46.76	38.831	38.64	37.608	34.341	35.671	33.24	34.178
gene10198	tep1.L	17.467	17.921	18.95	19.013	13.97	13.509	13.362	11.542	6.168	5.664	14.995	11.791	12.121	13.417	8.203	7.671	7.876	8.572	12.379	9.622	21.65	19.767	21.915	19.431	18.108	19.45	13.453	12.327	11.836	11.868	10.062	10.186	12.792	11.042	8.997	17.797	24.445	17.269	12.128	8.068	8.851	15.061	16.745	17.849	18.566	17.545	17.041	16.332
gene10199	XB22063318.L [provisional]	36.595	40.779	27.477	28.618	25.341	20.037	23.983	21.79	5.419	5.986	18.214	21.989	20.618	22.472	22.173	21.355	22.806	23.305	28.41	28.645	19.719	19.277	18.762	13.373	16.125	17.801	41.373	40.985	40.659	31.86	39.733	35.961	30.674	34.746	34.309	47.168	48.013	56.931	17.915	18.839	19.527	26.896	24.272	24.019	26.806	25.355	24.944	21.723
gene102	zbtb24.L	30.418	29.818	31.207	32.111	32.063	36.495	27.782	28.1	11.574	13.592	27.847	29.187	31.374	32.091	25.085	26.935	24.15	27.839	32.172	25.351	32.936	33.892	33.444	29.229	29.73	30.044	35.083	36.257	31.502	34.033	33.281	33.688	30.709	36.076	31.703	32.077	31.864	33.78	26.347	26.821	27.053	29.421	28.909	27.239	29.664	31.409	29.228	30.452
gene1020	XB954544.L [provisional]	0	0	0.053	0	0	0	0	0	0	0	0.065	0	0	0	0	0	0	0	0	0.061	0	0.075	0.163	0.081	0	0	0	0	0.065	0	0.254	0.062	0	0	0.371	0	0	0	0.08	0.081	0.079	0	0	0	0	0	0	0
gene10200	zdhhc8.S	64.901	64.836	89.466	76.171	71.707	70.141	65.394	61.558	48.859	49.674	67.886	58.092	75.144	67.249	61.552	65.793	65.902	65.964	69.742	60.384	68.169	64.195	63.261	61.029	54.686	57.514	53.334	51.376	55.308	52.161	49.739	54.168	56.831	58.796	51.66	59.97	63.496	56.273	63.414	51.772	62.939	62.46	57.243	59.524	60.001	61.738	59.676	60.162
gene10201	dpp10.L	0.086	0.06	0.037	0.097	0.1	0	0.04	0	0.064	0.128	0.045	0.131	0.082	0.126	0.08	0.071	0.028	0	0.036	0.085	0.202	0.105	0.114	0.113	0.038	0	0	0.044	0	0.044	0.133	0.172	0	0.09	0.104	0	0.202	0.216	0	0.057	0.056	0.099	0.134	0.108	0.22	0.212	0	0.051
gene10202	<NA>	13.563	11.255	14.438	17.772	3.684	5.557	25.617	26.033	13.433	15.455	18.724	18.996	5.048	7.602	28.818	34.082	15.703	12.746	18.485	17.224	22.802	24.278	20.369	20.829	25.982	22.063	25.402	26.277	25.108	17.817	26.271	18.488	20.984	21.428	20.679	13.497	15.424	19.35	15.149	21.547	14.376	7.567	6.375	6.358	7.744	8.838	5.494	9.291
gene10203	c1orf127.L	0.39	0.481	0.227	0.239	0	0	0.687	0.322	2.62	2.21	0.617	0.431	0.503	0.413	0.245	0	0.035	0.032	0.044	0.105	0.498	0.648	1.054	1.12	1.087	0.634	0.344	0.324	0.508	0.109	0.384	0.691	0.315	0.278	0.577	0.51	0.312	0.426	0.691	0.491	0.685	0	0.11	0.067	0.135	0.052	0	0.315
gene10204	mypn.L	0	0	0	0	0	0	0	0.023	0.034	0.067	0	0	0	0	0.062	0.074	0.044	0.014	0.037	0	0	0	0	0.03	0	0.027	0.029	0	0	0	0	0	0	0	0	0.043	0.026	0	0.029	0	0	0	0	0	0	0	0.077	0
gene10205	lrrc23.S	0.67	0.591	0.923	0.347	0.359	0.178	0.713	0.467	1.383	1.146	0.733	0.704	0.292	0.45	1.425	0.509	0.452	1.883	1.401	1.68	1.445	1.412	0.408	1.219	1.441	0.829	4.589	2.898	2.622	3.635	3.899	2.933	2.288	2.503	2.419	3.479	3.257	4.406	0.501	0.611	0.895	0.355	0.399	0.29	0.098	0.455	0.439	0.824
gene10206	<NA>	34.09	31.543	45.478	46.382	23.612	32.506	26.769	28.126	16.23	17.748	34.795	25.706	28.475	28.141	19.722	18.531	19.549	23.192	32.581	26.526	21.193	25.627	25.861	20.027	21.25	23.343	19.196	28.299	14.998	30.406	19.792	22.458	25.055	21.596	16.592	33.696	34.818	31.563	27.298	37.776	31.264	26.666	34.474	25.389	28.145	25.63	31.311	25.795
gene10207	edem1.L	37.287	40.744	39.317	37.415	28.859	26.136	26.282	27.148	18.27	18.567	30.782	30.892	30.463	31.871	38.651	39.335	38.597	38.46	41.231	36.964	39.873	42.098	39.781	38.315	39.22	40.079	34.444	38.617	35.712	39.019	35.299	35.932	28.167	23.875	28.963	33.622	35.014	29.206	28.595	33.232	27.365	40.703	38.583	39.096	35.057	36.975	35.154	30.397
gene10208	<NA>	0	0	0	0	0	0	0	0	0	0	0	0	0	0	0	0	0	0	0	0	0	0	0	0	0	0	0	0	0	0	0	0	0	0	0	0	0	0	0	0	0	0	0	0	0	0	0	0
gene10209	ift57.S	34.642	33.651	33.794	41.095	33.975	44.932	47.47	51.715	25.634	32.502	47.626	52.826	47.112	52.297	36.798	34.429	31.743	40.485	36.043	31.529	34.274	44.504	40.492	39.505	44.123	36.918	32.944	35.036	36.879	36.717	36.024	37.821	36.153	36.979	45.342	38.538	39.394	42.717	36.456	43.957	47.928	30.027	28.705	31.002	32.204	27.269	32.262	26.104
gene1021	fam8a1.S	5.043	4.898	5.181	6.69	5.071	4.505	1.299	1.641	3.583	3.93	2.008	0.95	0.287	0.321	2.926	3.618	4.16	2.825	3.504	2.811	10.938	11.739	9.697	14.628	10.172	15.039	3.457	4.336	4.567	6.549	4.378	5.736	5.395	4.124	5.218	3.94	4.978	4.308	0.752	1.019	2.273	1.332	2.482	1.312	2.037	1.734	1.85	2.356
gene10210	<NA>	0.055	0.043	0.035	0.046	0.048	0	0.076	0	0	0	0.043	0	0	0.04	0	0.034	0	0	0	0	0.072	0.025	0.054	0.027	0.055	0.098	0	0	0	0	0	0	0	0	0	0	0	0	0	0.027	0	0	0.021	0	0	0	0	0
gene10211	ubl7.S	39.553	39.357	43.072	38.263	46.194	40.219	43.332	40.647	25.973	22.972	41.702	35.034	45.736	40.789	37.403	37.196	36.937	35.999	47.281	41.037	30.732	26.705	25.467	23.126	20.808	24.904	33.312	32.03	35.835	35.238	36.591	35.895	41.504	36.425	36.066	43.104	47.72	40.728	42.989	33.904	45.206	33.902	31.089	33.43	33.113	30.629	31.291	32.918
gene10212	mrto4.L	73.961	66.727	58.097	56.175	61.422	63.084	51.817	49.508	21.244	23.844	49.888	47.68	55.082	54.918	45.517	45.147	57.805	50.293	61.148	69.586	46.845	52.331	48.683	46.66	52.918	48.734	43.59	41.316	38.604	40.16	37.843	35.216	41.939	44.274	44.663	64.466	51.634	58.363	55.148	49.365	53.494	69.536	62.417	65.902	67.797	65.382	65.103	68.618
gene10213	<NA>	0	0	0	0	0	0	0	0	0.678	0.562	0	0.077	0	0	0.14	0.437	0	0	0	0	0	0	0.2	0	0.269	0	0.293	0	0.161	0.697	1.092	0	0.523	0.633	0.547	0	0	0	0	0	0.195	0	0	0	0	0	0	0
gene10214	ankrd63.L	3.756	3.803	8.218	9.102	8.646	7.251	5.718	5.788	7.06	5.514	4.039	4.564	4.957	3.661	8.412	10.633	9.111	8.956	8.544	11.694	8.494	10.502	8.481	10	8.103	10.006	9.673	8.164	7.468	8.468	9.166	9.341	10.398	8.711	8.004	10.685	11.675	9.243	6.361	4.606	4.567	7.767	8.15	8.734	8.458	9.18	8.32	7.48
gene10215	klhl18.L	47.117	51.621	56.03	47.94	52.902	34.896	34.454	32.13	37.112	31.685	35.563	31.952	34.342	32.093	45.404	49.646	60.612	45.094	43.536	64.872	50.753	48.025	52.38	49.877	51.067	50.995	44.184	43.906	45.417	41.113	42.83	41.595	46.568	50.275	44.125	54.861	55.243	49.674	40.053	39.323	36.083	68.585	75.325	68.076	76.579	72.091	70.456	69.127
gene10216	sec11c.L	17.463	17.254	13.258	11.755	19.085	14.85	12.89	13.191	4.168	4.92	13.625	12.378	21.641	15.244	10.623	14.248	14.97	10.104	11.514	18.987	12.45	14.68	15.681	16.761	17.519	14.779	13.977	14.157	11.851	13.213	12.407	10.814	15.511	12.953	15.348	16.727	16.356	14.674	16.771	18.42	13.032	10.232	12.089	12.444	15.552	14.227	13.887	13.87
gene10217	vcpip1.L	18.404	19.231	12.644	12.023	20.402	19.805	11.449	10.257	2.992	3.02	11.861	10.852	12.242	13.069	13.459	12.99	15.711	15.115	15.418	18.676	19.776	18.554	18.621	18.046	18.556	18.638	10.558	9.939	10.068	8.586	11.325	9.546	11.257	10.934	10.149	13.357	16.179	11.818	10.736	9.255	11.451	14.832	14.796	15.317	15.189	14.548	17.585	14.933
gene10218	usp44.S	44.665	45.205	51.611	46.059	41.334	41.268	38.713	32.536	15.143	16.191	37.007	31.065	40.417	35.84	42.249	43.093	46.383	45.147	51.389	44.639	40.602	39.081	35.27	34.761	33.766	34.901	35.238	30.724	34.923	34.505	34.099	41.097	35.043	39.451	35.634	40.407	49.389	38.543	36.127	32.242	37.733	49.553	49.646	52.793	48.732	44.549	46.998	49.847
gene10219	<NA>	1.186	1.438	1.175	2.061	1.201	2.111	0.689	0.463	1.199	1.532	0.968	0.814	0.815	0.835	1.905	1.467	2.162	1.398	2.697	1.021	1.543	1.818	2.047	2.264	2.039	2.258	1.927	2.269	2.07	1.702	1.951	1.433	2.323	1.919	1.175	1.87	1.882	1.55	0.67	0.908	0.517	0.66	1.127	0.861	0.803	0.62	0.652	0.34
gene1022	opn1sw.L	0	0	0	0	0	0	0	0	0	0	0	0	0	0	0	0	0	0	0	0	0	0	0	0	0	0	0	0	0	0	0	0	0	0	0	0	0	0	0	0	0	0	0	0	0	0	0	0
gene10220	rpap3.L	60.393	63.506	38.856	43.452	43.533	60.565	28.039	30.163	23.78	27.512	29.25	30.428	28.49	29.41	26.603	25.631	22.577	28.527	36.675	31.713	47.012	49.957	51.998	47.848	55.223	44.308	29.686	27.462	28.051	27.36	25.704	25.949	23.063	24.519	24.991	29.206	30.099	35.862	23.549	28.262	32.119	31.406	25.862	26.415	27.961	26.765	28.049	25.209
gene10221	<NA>	0.327	0.157	0.418	1.1	0.088	0	0.452	0.418	0.45	0.112	0.318	0.458	0.321	0.402	0.104	0.155	0.024	0.069	0.031	0.037	0.309	0.184	0.149	0.248	0.167	0.135	0.195	0.306	0.16	0.501	0.427	0.264	0.298	0.236	0.091	0.217	0.132	0.453	0.392	0.646	0.146	0.607	0.351	0.189	0.672	0.407	0.557	0.492
gene10222	fbxo41.L	0.014	0.071	0.035	0.092	0.048	0	0.075	0.021	0.153	0.182	0.086	0.083	0.039	0.04	0.132	0.084	0.027	0.112	0.169	0.061	0.191	0.075	0.135	0.188	0.145	0.049	0.053	0.041	0.087	0.167	0.126	0.123	0.141	0.128	0.049	0.039	0	0.082	0	0.027	0.026	0.071	0.042	0.102	0.078	0.08	0.139	0.194
gene10223	rpa1.L	116.812	117.386	123.134	127.66	92.535	97.621	142.777	138.632	33.785	34.134	143.658	139.142	149.62	149.913	127.078	118.958	130.456	131.321	131.539	124.171	105.337	100.853	106.506	96.26	92.45	101.811	115.399	123.7	122.868	130.43	109.035	122.845	131.467	130.808	120.812	114.224	133.121	123.866	131.965	126.209	129.646	120.009	114.184	116.777	108.022	117.227	112.625	112.707
gene10224	cryga.12.S	0	0	0	0	0	0	0	0	0	0	0	0	0	0	0	0	0	0	0	0	0	0	0	0	0	0	0	0	0	0	0	0	0	0	0	0	0	0	0	0	0	0	0	0	0	0	0	0
gene10225	XB5872372.S [provisional]	6.892	5.528	3.806	5.616	4.049	3.752	3.113	4.603	5.844	4.357	4.819	4.738	3.397	3.589	4.213	5.829	6.502	5.7	6.009	5.916	2.925	3.447	5.03	3.291	5.507	3.243	4.215	4.301	3.577	3.783	3.81	3.913	2.9	2.729	4.062	4.17	2.93	5.008	2.683	3.731	4.621	3.751	3.261	2.585	3.6	2.991	5.192	2.58
gene10226	pfkm.L	2.578	3.042	2.546	2.735	2.639	2.609	4.926	4.573	1.693	1.808	4.388	4.768	3.778	4.811	2.557	2.598	2.921	2.535	2.876	2.659	3.538	3.995	4.164	3.814	4.777	3.057	2.659	2.386	2.719	3.009	2.164	2.015	2.24	3.25	3.189	2.416	2.51	2.439	4.637	3.991	4.219	4.733	4.952	4.362	3.049	4.291	4.632	4.435
gene10227	fgfbp2.L	0	0	0	0	0	0	0	0	0	0	0	0	0	0	0	0	0	0	0.07	0	0	0	0	0	0	0	0	0	0	0	0	0	0	0	0	0	0	0	0	0	0	0	0	0	0	0	0	0
gene10228	mtap.L	32.195	32.571	25.521	31.248	20.54	21.635	24.986	25.327	9.811	10.996	23.725	25.332	24.824	27.955	26.327	23.327	24.036	31.612	38.315	34.605	28.033	34.956	39.081	31.621	40.986	32.432	47.445	42.863	43.141	50.695	47.271	43.921	40.599	35.364	43.55	44.776	45.897	52.889	27.195	30.86	27.958	27.482	27.514	26.197	24.691	25.631	24.61	22.93
gene10229	pdha1.L	122.692	131.143	97.334	89.137	95.385	92.578	144.575	147.769	103.782	103.167	154.684	144.258	161.163	157.897	135.567	129.895	151.745	141.463	137.673	169.124	128.28	130.007	117.489	114.186	121.56	120.697	148.971	141.562	155.473	143.868	138.991	141.834	162.033	151.247	153.839	144.34	163.228	155.545	144.723	150.2	137.659	151.257	146.721	150.96	149.749	160.329	143.683	148.953
gene1023	tnfaip1.L	75.286	76.021	81.359	77.804	75.252	77.756	82.348	75.8	58.916	61.675	78.86	79.955	90.968	81.63	70.044	71.691	68.233	74.267	72.998	68.631	75.871	78.194	72.749	75.833	69.498	72.252	69.539	78.363	73.511	79.342	66.564	74.137	76.56	78.482	72.882	70.707	74.379	67.144	67.928	64.563	71.48	70.986	68.339	68.327	66.107	69.168	65.056	66.082
gene10230	<NA>	22.858	22.594	2.638	3.319	3.908	3.631	16.717	15.1	3.009	3.041	17.082	14.806	15.931	15.03	5.236	5.54	6.462	5.814	6.843	8.572	10.45	10.238	8.034	9.635	11.519	10.778	0.651	0.92	1.034	1.547	1.246	1.142	0.995	0.913	0.931	0.934	1.456	1.177	18.366	17.773	16.046	4.982	6.147	6.598	4.747	6.17	5.613	5.38
gene10231	fggy.L	1.059	1.105	0.452	0.99	1.026	0.608	0.977	1.244	0.263	0.916	1.674	0.983	1.252	1.626	0.894	1.018	1.547	1.182	1.454	2.267	0.516	0.752	0.932	0.812	0.783	0.421	0.797	0.358	0.187	0.09	0.636	0.176	0.435	0.369	0.425	0.423	0.62	0.618	1.717	1.396	1.135	1.318	2.917	2.757	2.694	1.559	1.503	1.569
gene10232	<NA>	327.756	315.317	300.191	286.103	283.457	352.561	342.006	325.89	224.123	215.33	350.013	332.736	374.868	362.251	299.356	308.976	355.306	332.374	315.582	408.605	318.233	319.379	319.864	321.409	311.462	333.3	337.774	341.743	334.403	343.844	337.397	335.608	370.162	374.322	364.456	396.529	393.48	365.836	333.585	327.72	361.081	350.257	374.369	378.88	390.794	365.382	378.926	388.604
gene10233	<NA>	0	0.067	0	0.109	0.056	0	0.022	0.024	0	0.072	0.128	0.074	0.046	0.141	0.022	0.12	0.031	0.044	0.02	0.024	0.057	0	0	0.064	0	0	0.063	0.172	0.051	0.198	0.125	0	0.048	0	0.088	0.093	0.114	0.145	0.063	0.192	0.156	0.056	0.075	0.03	0.062	0	0.055	0.029
gene10234	ate1.S	5.467	5.915	5.452	5.411	7.991	6.374	9.457	8.016	3.148	4.113	8.645	8.059	9.126	8.538	4.835	3.876	5.913	5.545	6.56	6.913	11.698	12.267	10.43	8.879	10.331	11.571	7.239	8.31	6.393	6.966	6.829	6.624	7.676	6.047	6.243	8.317	9.106	8.444	7.825	7.632	8.301	9.698	11.214	10.477	9.742	10.712	10.548	11.079
gene10235	<NA>	0	0	0	0	0	0	0	0	0	0	0	0	0	0	0	0	0	0	0	0	0	0	0	0.039	0	0	0	0	0	0	0	0	0	0	0	0	0	0	0	0	0	0	0	0	0	0.058	0	0
gene10236	hrob.S	32.014	28.381	43.255	38.983	41.267	32.219	36.671	31.093	19.467	21.784	34.985	31.033	39.29	33.342	33.746	35.52	38.258	36.06	38.78	33.757	32.333	25.437	24.223	26.765	24.958	27.376	25.992	28.639	30.521	28.819	28.026	30.09	33.191	34.277	33.487	35.713	40.334	33.642	39.29	34.116	36.939	35.467	35.364	37.568	34.248	38.938	37.187	41.812
gene10237	gtf3c6.L	15.669	15.027	5.985	8.922	14.584	20.582	8.949	11.983	5.305	7.287	11.351	11.327	11.928	12.01	10.936	11.111	12.472	12.582	9.086	14.316	8.804	9.768	9.008	10.712	10.993	11.831	9.641	8.617	10.73	8.958	10.187	10.301	9.7	9.018	10.159	9.29	7.722	8.926	8.14	13.3	10.816	11.997	14.431	13.419	16.576	12.915	14.47	14.104
gene10238	rpl34.S	122.489	131.783	127.207	134.43	68.11	54.314	80.464	80.124	80.937	80.951	61.063	65.05	58.567	70.059	62.892	69.401	50.584	69.332	96.841	53.298	45.905	55.963	56.262	60.394	66.195	53.958	77.347	76.907	87.178	81.679	85.343	78.128	81.142	83.457	78.147	127.533	104.831	137.85	88.556	75.486	59.103	50.861	57.778	47.021	51.241	59.788	47.265	50.113
gene10239	tcf7.S	23.366	24.575	37.674	31.076	27.634	29.264	24.919	22.68	21.694	24.117	25.531	20.946	27.261	23.639	23.967	23.013	24.46	23.021	30.177	24.31	21.383	20.684	19.263	24.437	22.213	24.63	16.525	15.598	16.036	18.798	16.493	19.412	24.517	22.568	19.715	27.325	31.228	24.738	22.352	14.845	27.45	23.099	23.658	25.358	24.698	26.4	28.372	30.693
gene1024	<NA>	14.886	13.232	0	0	3.852	2.893	0	0.067	0.198	0	0	0	0.063	0	1.221	0.055	0	0	0.055	0.065	0	0.081	0	0	0	0	0.086	0.067	0.07	0.203	0.205	0.066	0.065	0.138	0.08	0.444	0.078	0.133	0	0	0.085	0	0	0	0	0	0	0
gene10240	adprhl1.S	0.021	0.067	0.027	0.072	0	0	0.03	0.032	0	0	0.068	0.032	0	0	0	0.026	0	0.02	0	0.032	0	0.078	0.042	0.042	0.085	0.038	0	0.065	0.034	0.098	0	0.032	0	0	0	0	0.038	0	0	0	0.041	0	0.033	0.04	0	0	0	0.038
gene10241	<NA>	0	0	0	0	0	0	0	0	0	0	0.041	0	0	0	0	0	0	0	0.13	0	0.046	0.192	0	0.103	0.035	0.094	0.152	0.04	0.083	0.08	0	0.118	0.078	0.082	0.047	0	0.046	0	0	0	0	0	0.041	0	0	0	0	0
gene10242	xylt1.L	1.456	1.482	5.497	4.301	0.495	0.734	1.523	2.843	4.687	4.343	1.46	1.456	2.217	1.911	0.883	1.009	0.899	1.135	2.107	2.79	0.498	0.195	0.352	0.77	0.378	0.635	0.825	0.432	0.395	0.708	0.494	0.638	0.526	0.278	0.705	0.663	0.499	0.479	2.142	2.177	1.37	2.019	2.036	1.931	2.642	1.882	1.331	2.21
gene10243	septin6.L	3.522	3.921	16.793	14.401	2.912	3.598	6.717	7.45	4.32	4.643	8.005	8.441	7.664	7.516	5.519	4.87	7.752	6.031	7.419	8.626	5.672	7.867	10.13	6.021	7.366	6.391	15.107	16.935	17.554	15.286	16.16	15.871	15.141	13.329	15.644	14.545	17.733	18.009	7.67	8.721	7.856	3.642	4.448	5.431	4.133	5.532	3.912	3.526
gene10244	kcne5.S	0.044	0.092	0.112	0	0	0	0.122	0.133	0.098	0	0.139	0	0	0.064	0.061	0.163	0	0	0.054	0.847	0.077	0.161	0	0.26	0.117	0	0.085	0.2	0	0	0.068	0	0	0	0	0	0.309	0.066	0.086	0	0.085	0.227	0.409	0	0.084	0.388	0.15	0.234
gene10245	actr3.S	121.943	119.987	125.866	126.53	117.186	93.148	94.819	91.427	54.8	61.341	96.186	93.685	103.821	95.555	87.794	95.326	113.471	102.16	113.1	145.613	112.302	110.131	108.846	102.786	101.816	110.01	84.266	83.145	80.802	87.924	80.107	82.177	92.736	94.992	91.472	105.126	114.899	113.66	101.259	103.276	101.564	142.222	134.021	143.751	134.511	138.342	141.058	141.261
gene10246	myf5.L	0	0	0	0	0	0	0.673	0.294	71.376	65.762	0	0.591	0	0	0	0	0	0	0	0	0.341	0	0	0	0	0	0	0	0.464	0	0	0	0	0	0	0	0	0	0.379	0.192	0	0	0	0	0	0	0.166	0
gene10247	odf3.L	0.363	0.241	0	0	0.346	0.342	0	0	0	0	0	0	0	0	0.183	0.122	0.097	0.06	0.082	0.049	0	0	0.131	0.326	0.044	0.118	0.064	0.1	0.21	0.456	0.153	0	0.244	0.207	0.06	0.237	0.116	0.248	0.064	0	0	0	0	0	0	0	0	0
gene10248	trmt10b.S	7.51	7.352	7.82	7.93	5.308	7.446	7.473	8.195	1.153	1.856	8.074	8.351	8.01	8.749	4.751	5.31	4.28	5.068	6.615	4.367	5.723	7.491	7.73	6.874	6.7	7.372	8.698	7.536	7.378	7.453	7.62	6.766	5.814	6.192	6.516	8.181	7.414	6.887	6.259	7.961	8.432	4.949	5.173	4.695	5.386	4.228	5.73	4.757
gene10249	mtss1.2.S	61.528	63.748	80.627	69.279	80.449	59.747	62.952	60.105	79.869	81.689	58.384	58.079	68.794	64.303	64.356	68.693	77.513	72.309	72.363	71.26	65.68	68.937	62.788	62.77	59.759	64.048	52.15	47.352	48.727	49.554	49.756	52.559	48.405	55.681	49.684	60.31	65.626	56.023	66.16	60.08	65.904	87.992	91.315	91.156	87.911	89.166	90.078	90.564
gene1025	smndc1.L	86.512	85.948	82.759	83.085	86.258	89.035	85.446	90.558	108.519	109.729	89.179	94.307	102.476	98.054	93.723	92.094	104.655	98.105	95.138	117.411	67.955	73.161	72.35	66.848	75.912	78.713	81.005	79.784	76.648	78.077	72.942	73.053	86.206	87.954	87.584	92.361	83.63	87.311	89.372	86.202	94.108	107.077	110.704	121.037	115.06	110.331	114.095	115.32
gene10250	stab2.L	0.104	0.06	0.118	0.155	1.167	1.83	0.08	0.07	0.801	1.232	0.073	0.07	0.049	0.067	0.16	0.585	0.427	0.095	0.143	0.222	0	0.021	0	0	0.015	0	0	0.07	0.037	0.035	0.053	0.104	0.051	0.018	0.021	0	0.02	0.052	0.045	0.114	0.045	0.119	0.161	0.043	0.088	0.272	0.138	0.103
gene10251	pkd2.L	62.469	63.516	61.792	62.07	64.326	78.278	62.245	59.41	23.324	20.219	62.579	57.144	72.482	65.46	56.842	56.812	60.07	60.95	61.155	56.3	65.064	61.635	60.584	63.02	59.449	63.627	60.179	66.391	62.072	63.459	57.215	64.385	63.308	68.113	60.402	69.738	69.154	64.957	57.286	51.051	55.373	57.759	57.764	65.219	61.115	58.879	60.042	60.347
gene10252	<NA>	10.174	9.542	8.428	11.745	9.086	8.472	7.551	9.282	2.75	4.701	8.551	9.705	6.416	9.225	5.165	5.043	5.075	4.984	4.861	7.579	10.599	14.911	10.125	13.377	13.157	10.282	10.279	11.431	9.303	11.458	10.249	8.984	9.096	10.398	13.049	11.582	10.704	15.414	7.559	10.11	7.21	10.249	10.97	11.245	11.444	11.868	10.721	12.498
gene10253	gstt1-like.2.L	0.201	0.105	0.086	0	0	0	0.232	0.051	0.225	0	0	0.051	0.095	0.098	0.278	0.041	0.131	0.061	0.124	0.448	0.235	0	0.066	0	0.089	0.06	0	0.204	0.053	0.051	0.104	0	0	0.105	0	0	0.118	0.101	0.196	0.066	0.065	0	0	0	0	0.099	0	0
gene10254	ltb.L	7.096	8.037	8.308	9.655	2.107	2.603	4.806	3.878	0.676	0.672	2.388	1.835	2.357	4.174	6.68	9.146	6.619	7.311	11.2	5.82	4.5	7.174	4.486	7.742	3.82	3.779	1.754	1.607	1.201	3.474	2.332	4.298	2.235	1.893	4.363	3.254	3.447	3.172	4.997	2.688	4.663	8.847	3.042	5.946	6.915	8.225	6.175	6.712
gene10255	atp2c2.L	0	0.068	0	0	0	0.112	0.09	0	1.088	0.937	0	0.148	0	0.047	0.045	0.16	0.063	0.03	0.12	0.24	0	0	0.064	0.064	0.043	0.116	0.063	0.049	0	0.298	0	0	0	0	0	0.14	0	0	0	0.064	0	0.112	0.251	0.061	0	0.143	0.166	0
gene10256	<NA>	0	0	0	0	0	0	0	0	0	0	0	0	0	0	0	0.107	0	0	0	0	0	0	0	0	0	0	0	0	0	0	0	0	0	0.136	0	0	0	0	0	0	0	0	0	0	0	0	0	0
gene10257	star.S	0	0	0	0	0	0	0	0	0	0	0	0	0	0	0	0.122	0	0	0	0	0	0	0	0.097	0	0	0	0	0	0.075	0	0	0	0	0	0	0	0	0.096	0	0	0	0	0	0	0.072	0	0
gene10258	med13l.L	44.192	44.208	58.505	48.09	47.526	38.449	35.882	33.392	18.568	18.231	36.104	32.042	39.321	37.906	43.545	47.98	50.712	46.335	50.505	47.926	38.1	34.359	33.53	32.152	32.897	31.177	32.878	32.919	32.114	32.217	31.796	37.717	35.759	39.53	32.573	41.116	45.017	36.321	38.138	29.47	37.935	46.086	43.066	45.51	45.537	46.767	48.327	46.669
gene10259	tpte2.L	51.276	50.014	52.109	61.507	41.826	43.655	59.083	64.785	23.935	24.86	61.824	63.457	62.346	69.159	54.909	57.694	54.765	63.628	69.441	57.178	48.773	51.368	47.886	49.003	53.465	50.342	47.557	51.549	54.626	51.054	47.564	45.274	42.677	42.995	48.511	47.83	47.511	48.583	56.586	70.296	66.933	51.085	43.415	47.133	47.874	48.234	48.387	49.641
gene1026	sash3.L	0.033	0	0	0	0	0.112	0.075	0.033	0	0.193	0.017	0.083	0.031	0.032	0	0.013	0	0.01	0.081	0	0	0	0	0	0	0	0	0	0	0	0.017	0.016	0.016	0.051	0	0	0.019	0	0.063	0.065	0.105	0	0.017	0	0.062	0	0	0
gene10260	slc13a4l.S	23.837	24.879	27.926	23.104	32.055	30.526	21.849	19.966	23.917	25.716	20.228	18.34	22.496	21.439	23.279	25.597	27.73	26.925	27.341	32.092	28.421	25.949	27.417	25.711	24.001	23.988	23.339	26.207	24.505	23.012	24.522	26.165	26.913	28.453	25.805	29.526	31.573	24.964	21.591	17.513	21.492	28.247	30.289	31.281	32.432	30.091	34.026	32.168
gene10261	kdelr3.L	51.736	46.589	76.53	58.914	65.465	51.965	77.929	58.034	58.755	74.198	65.21	59.675	76.31	66.217	53.512	62.874	63.095	62.28	64.683	55.799	60.353	58.115	58.56	61.95	51.544	56.684	66.1	65.191	64.811	64.134	71.048	76.056	73.281	80.008	66.037	74.615	82.32	63.623	67.775	51.738	76.204	61.674	60.439	68.022	56.976	57.129	59.491	61.562
gene10262	ube2j1.L	79.096	77.391	66.173	67.864	51.181	68.695	73.168	79.409	50.959	52.391	74.926	83.387	83.336	83.672	61.706	64.725	54.704	64.645	62.049	46.376	63.927	69.611	64.912	66.168	68.237	65.803	56.372	62.383	59.4	67.151	63.702	65.396	56.993	59.001	63.1	58.82	55.647	61.733	69.468	69.504	68.873	47.364	49.791	49.251	46.047	49.745	51.337	47.667
gene10263	elavl1.L	72.93	74.185	73.227	75.231	75.449	96.13	70.587	72.073	71.672	68.195	73.208	73.512	78.393	74.821	56.332	57.504	48.527	62.776	64.33	50.614	66.47	66.86	69.47	71.764	63.813	67.31	74.901	79.269	79.276	81.301	69.008	80.885	73.577	77.596	76.932	72.386	74.463	75.638	62.518	64.803	67.335	48.031	48.808	45.87	45.385	46.679	47.636	47.773
gene10264	slc4a9.L	0.051	0.053	0.194	0.17	0.088	0	0.21	0.267	0	0.113	0.24	0.499	0.144	0.331	0.245	0.094	0.123	0.092	1.814	1.2	0.044	0	0.251	0.299	0.202	0.045	0.098	0.231	0	0.116	0	0.038	0	0.04	0	0.145	0.044	0.076	0.197	0.35	0.293	0.479	1.176	1.091	1.11	0.67	0.172	0.315
gene10265	abhd15.L	42.138	43.432	35.797	38.96	35.023	27.814	35.926	34.58	9.419	10.339	35.089	35.299	31.608	33.238	34.373	38.919	39.47	37.495	40.44	49.799	35.13	36.38	36.306	31.565	33.109	35.044	36.936	43.458	42.404	37.189	40.568	39.548	39.338	41.847	39.357	48.008	48.668	44.215	36.534	36.077	34.106	44.055	43.358	41.524	40.083	42.157	41.543	38.752
gene10266	gzmh.S	0	0	0	0	0	0	0	0	0	0	0	0	0	0	0	0	0	0	0	0	0	0	0	0	0	0	0	0	0	0	0	0	0	0	0	0	0	0	0	0	0	0	0	0	0	0	0	0
gene10267	rnf13.L	42.72	44.187	36.811	37.76	42.978	49.917	49.635	51.719	13.733	10.665	50.879	56.73	53.271	59.433	44.545	40.363	47.081	50.723	49.673	65.115	40.935	53.274	50.81	57.114	53.315	50.235	46.423	50.944	44.307	46.841	44.359	49.063	45.782	43.954	44.42	46.294	41.596	48.922	49.655	59.456	48.952	42.057	44.065	46.663	45.658	44.332	39.625	45.272
gene10268	XB5932119.L [provisional]	39.674	41.475	74.389	74.557	30.776	26.319	33.691	30.632	3.641	5.568	33.451	30.511	40.136	36.783	21.976	25.451	30.786	26.584	34.273	39.896	33.79	33.737	31.609	26.411	28.501	30.657	66.165	67.063	63.503	61.904	54.514	63.755	61.422	62.075	63.289	71.841	87.371	73.055	39.348	34.407	36.596	39.147	39.571	47.644	42.276	47.542	42.44	39.392
gene10269	bcl2l2.L	24.892	26.094	24.608	25.279	21.009	19.764	19.837	21.654	7.064	6.134	22.151	24.25	20.492	23.176	17.157	16.911	21.916	20.951	22.116	36.637	31.043	34.283	37.59	29.913	37.595	30.687	21.853	26.917	21.931	23.54	23.707	24.681	20.091	22.972	29.161	28.675	26.637	28.204	19.213	26.768	22.62	28.14	37.229	29.191	33.654	33.016	35.244	29.81
gene1027	cracr2b.S	23.986	22.305	17.711	18.361	31.609	24.713	17.472	16.893	3.834	5.416	16.685	18.011	19.577	19.417	31.541	29.651	32.327	29.986	31.549	41.579	18.496	18.539	18.933	17.695	18.253	19.105	18.422	19.601	18.287	19.016	21.379	21.346	19.624	20.631	19.949	24.487	24.071	22.055	16.764	19.172	18.1	32.867	29.209	31.029	35.191	30.27	31.576	33.031
gene10270	immp2l.L	14.829	16.335	14.68	17.635	20.307	27.273	9.29	10.4	2.989	2.895	9.424	10.039	9.865	10.264	8.002	7.663	8.007	9.981	10.754	11.221	19.213	22.844	22.725	25.869	25.449	21.737	12.667	12.702	10.676	11.398	13.277	10.365	9.126	8.748	8.35	11.908	13.051	13.464	8.134	11.853	9.254	11.391	13.959	11.817	14.444	12.858	14.064	12.058
gene10271	sema3c.S	8.22	8.053	7.139	8.889	6.935	7.775	8.913	10.76	3.652	3.169	9.199	10.593	8.801	10.492	7.262	6.457	7.112	9.299	8.292	7.216	5.099	5.911	6.76	5.209	6.323	6.049	5.919	7.894	6.514	7.191	6.6	8.314	5.975	6.65	7.664	6.993	7.765	5.611	8.261	7.923	10.481	6.444	6.117	6.901	8.099	5.811	6.928	5.805
gene10272	vps53.S	22.308	20.477	19.678	21.917	22.772	25.385	26.853	23.032	12.367	12.74	25.245	25.92	26.868	27.306	19.969	19.403	17.779	21.112	20.87	16.413	21.896	22.092	18.489	21.24	19.812	20.002	18.721	19.798	17.475	18.054	17.666	20.313	19.528	17.793	15.681	19.049	20.556	18.415	20.673	20.64	21.27	17.15	15.786	17.628	15.933	15.586	16.047	16.508
gene10273	<NA>	0.138	0.24	0.295	0.258	0.107	0.159	0.191	0.255	0.309	0.239	0.243	0.187	0.458	0.223	0.404	0.475	0.524	0.477	0.532	0.319	0.215	0.168	0.03	0.121	0.184	0.11	0.03	0	0.049	0.047	0.024	0.046	0	0	0.194	0.154	0.027	0	0.299	0.273	0.178	0.582	0.738	0.576	0.293	0.249	0.445	0.273
gene10274	rab1a.S	35.585	36.241	39.961	39.138	38.626	38.177	36.767	35.883	50.986	55.666	36.945	35.638	39.999	37.485	31.814	33.577	37.468	34.575	37.974	47.429	38.325	36.045	35.447	36.023	33.435	34.457	30.039	32.231	28.954	29.809	28.783	30.751	32.363	34.483	29.944	33.063	33.016	33.08	38.677	35.881	38.385	42.949	46.108	47.813	48.11	46.797	48.699	49.541
gene10275	rev1.S	32.692	31.072	49.111	50.492	48.414	60.174	63.518	61.611	36.957	35.403	63.008	63.724	68.122	72.239	51.439	51.348	52.843	55.706	57.449	46.575	33.071	31.231	33.49	34.322	31.793	31.675	57.144	61.196	63.37	64.145	56.903	62.506	63.153	71.02	61.586	59.869	63.279	60.135	55.007	50.416	57.357	59.128	53.175	51.471	51.037	53.319	56.642	54.886
gene10276	<NA>	0	0	0.112	0	0	0	0	0	0.098	0.097	0	0	0	0	0.06	0	0	0	0.108	0	0.153	0	0.086	0	0	0	0	0	0.069	0	0	0.131	0	0	0	0	0	0	0.085	0	0	0	0.068	0	0	0	0	0.078
gene10277	aga.L	14.239	12.138	9.921	15.305	5.721	7.71	11.04	10.587	5.005	3.317	11.319	11.21	11.848	10.521	14.327	12.442	13.073	15.052	15.115	19.454	6.273	6.948	10.189	5.44	6.95	4.799	12.704	12.919	11.502	13.377	13.127	12.51	11.92	9.463	13.195	13.818	17.937	14.095	13.062	13.565	11.223	14.261	17.331	17.335	12.947	14.818	15.117	15.51
gene10278	arl1.L	40.053	42.597	27.482	33.236	34.685	46.185	34.598	32.969	73.246	69.126	35.494	34.824	34.983	38.28	30.17	28.854	25.093	31.671	27.918	33.173	35.351	40.385	40.626	39.224	40.189	33.09	34.903	42.199	43.057	41.623	43.945	38.282	35.986	36.253	37.29	36.613	31.29	36.268	30.92	41.657	29.855	35.703	34.57	32.763	34.265	33.756	29.772	33.769
gene10279	<NA>	84.452	78.647	59.544	74.734	77.661	93.91	83.212	95.417	30.274	31.984	89.041	92.52	89.705	105.747	69.704	76.2	56.444	78.873	73.056	50.913	71.262	71.07	77.032	74.904	79.018	68.231	74.368	78.759	85.015	84.116	88.648	91.715	89.727	81.764	82.615	74.009	77.994	79.384	81.966	96.353	93.325	50.082	49.459	44.257	48.628	49.308	49.623	51.46
gene1028	igf2.L	2.767	3.259	0	0.085	0	0.088	0.141	0.038	1.306	1.468	0.201	0.116	0.18	0.074	0	0.063	0	0.116	0.094	0.075	0	0.046	0	0	0.169	0	0.049	0.039	0.081	0.156	0.157	0	0.038	0.04	0.138	0.182	0.045	0.114	0.099	0.05	0.196	0.175	0.039	0.19	0.097	0.224	0.087	0.226
gene10280	svep1l.S	0	0	3.771	2.48	0	0	0	0	0	0	0	0	0	0	0	0	0	0.067	0	0	0	0	0.146	0	0	0	0	0	0	0.113	0	0	0	0	0	0	0.129	0	0	0	0	5.206	5.595	6.079	7.312	6.943	6.152	6.682
gene10281	sh2d6.L	0	0	0.264	0	0.36	0.178	0.071	0.078	0.231	0.345	0.082	0.078	0	0	0	0	0.101	0	0.128	0.077	0	0	0	0	0.138	0.092	0	0.079	0.493	0	0.08	0	0.076	0	0.093	0	0.181	0	0.201	0.102	0	0.445	0.16	0.581	0.394	0	0.528	0.092
gene10282	<NA>	0	0	0	0	0	0	0	0	0	0	0	0	0	0	0	0	0	0	0	0	0	0	0	0	0	0	0	0	0	0	0	0	0	0	0	0	0	0	0	0	0	0	0	0	0	0	0	0
gene10283	<NA>	5.335	5.312	7.64	11.156	0.039	0.038	11.724	17.35	2.647	2.259	19.398	15.799	17.373	15.507	4.428	2.18	2.696	5.424	6.168	6.238	6.496	5.996	5.991	6.097	5.44	6.086	0.043	0.051	0.018	0.068	0.034	0.15	0.05	0.035	0.02	0.08	0.157	0.134	17.62	10.948	11.524	0.212	0.329	0.544	0.256	0.362	0.19	0.377
gene10284	sppl2b.L	0.309	0.699	0.132	0	0.18	0.355	0.071	0	0	0	0.082	0	0.073	0.075	0	0	0	0	0	0.076	0.542	0.471	0.51	0.61	0.343	0.737	0	0	0	0	0	0	0	0	0	0	0	0	0	0	0	0.622	0.16	0.193	0.393	0.152	0.527	0.642
gene10285	nme5.L	1.97	2.995	9.073	12.311	10.795	12.416	8.645	9.437	9.192	9.764	9.79	10.086	8.943	9.497	7.236	11.061	7.401	9.357	7.931	7.175	7.794	8.022	7.022	6.215	6.82	5.936	9.372	8.896	9.13	8.976	7.04	9.106	8.498	7.231	9.655	7.277	7.412	8.022	9.421	9.572	9.666	6.401	6.541	7.07	4.618	8.368	5.562	6.004
gene10286	fbxo3.S	13.122	15.412	24.744	20.476	14.568	9.41	21.62	19.923	11.921	8.778	21.688	17.633	24.406	21.531	14.413	15.367	19.19	16.735	16.426	17.212	13.03	12.02	11.4	12.129	10.817	12.465	13.819	13.747	13.181	13.013	13.359	13.845	13.875	13.76	12.235	16.822	21.369	16.63	23.623	22.765	24.754	22.103	21.56	24.298	21.589	20.53	21.351	24.444
gene10287	sox10.S	0	0	0	0	0	0	0.027	0.029	0	0	0	0	0	0	0	0.024	0	0	0	0	0	0	0	0	0	0	0	0	0	0	0.03	0	0	0	0	0	0	0	0	0	0	0	0	0.037	0	0	0	0
gene10288	klhdc9.L	0	0	0	0	0.271	0	0	0	0	0.692	0	0	0	0.113	0	0.096	0	0	0	0	0	0.142	0.154	0	0.311	0	0	0	0.247	0.119	0	0	0	0	0.14	0	0	0.233	0	0	0	0.134	0.121	0.292	0	0.115	0	0
gene10289	<NA>	0	0	0	0	0	0	0	0	0	0	0	0	0	0	0	0	0	0	0	0	0	0	0	0	0	0	0	0	0	0.11	0	0	0	0	0	0	0	0	0	0	0	0	0	0	0	0	0	0
gene1029	anxa11.S	71.978	70.39	77.799	78.298	75.389	84.467	70.732	68.612	34.613	36.335	72.475	67.539	75.68	72.436	63.358	61.597	67.87	68.132	70.73	65.376	67.686	72.366	72.146	71.752	71.521	77.954	70.211	61.949	72.366	64.084	67.406	67.98	68.088	78.214	68.982	74.972	75.99	67.96	73.072	67.712	67.192	72.294	65.783	70.312	69.823	68.747	66.141	70.634
gene10290	krt15.1.L	0	0	0	0	0	0	0	0	0	0	0	0	0	0	0	0	0	0	0	0	0	0	0	0	0	0	0	0	0	0	0	0	0	0	0	0	0	0	0	0	0	0	0	0	0	0	0	0
gene10291	<NA>	32.102	32.323	51.802	46.234	46.052	49.979	49.177	48.181	26.141	27.426	48.44	43.082	51.383	46.4	43.532	44.825	47.209	45.928	47.489	43.037	46.833	41.19	38.653	40.974	37.299	43.25	39.385	41.099	40.199	42.559	38.162	43.49	42.806	49.723	40.472	45.729	47.199	43.994	41.735	35.777	47.155	34.828	30.569	33.862	31.342	33.638	34.63	34.124
gene10292	<NA>	0.181	0.151	0.046	0	0	0	0.5	0.437	0.889	0.884	0.514	0.11	0.41	0.315	0.05	0.045	0	0	0	0	0.697	0.726	0.716	1.069	0.673	0.646	0.07	0.055	0.115	0.499	0.391	0.216	0.107	0.226	0.065	0.26	0	0	0.422	0.572	0.349	0.187	0.168	0	0.069	0.053	0	0
gene10293	<NA>	1.803	2.259	0.554	0.486	3.271	1.741	1.997	2.397	1.775	1.925	1.255	1.534	2.354	1.574	1.396	1.248	1.405	1.186	3.656	0.856	2.15	1.846	2.715	1.707	1.633	0.903	2.095	2.412	2.409	2.323	3.231	4.107	2.136	3.052	1.303	3.42	1.393	2.056	2.247	1.997	2.506	1.989	1.453	1.758	1.79	2.23	1.598	2.437
gene10294	klhl40.L	0	0	0	0	0	0	0	0	0	0	0	0	0	0	0	0	0	0	0.036	0	0.051	0	0.115	0	0	0	0	0	0	0.089	0	0.043	0	0	0	0.042	0	0	0	0	0.056	0	0	0	0	0	0	0
gene10295	dpp10.S	0.093	0.097	0.239	0.418	0.108	0.107	0.129	0.141	0.278	0.138	0.049	0.094	0.044	0	0.086	0.154	0.242	0.284	0.115	0.23	0.163	0	0.246	0.061	0.041	0	0.12	0.142	0	0.334	0.096	0.047	0.092	0.243	0.224	0.089	0.327	0.187	0	0.123	0.18	0.536	0.241	0.175	0.237	0.137	0.212	0.111
gene10296	cst3.L	174.169	168.886	144.225	175.169	169.275	174.345	145.636	150.069	137.27	123.089	143.104	158.107	161.222	158.377	140.153	139.193	136.312	158.601	137.943	166.438	131.4	139.876	146.894	167.949	178.942	154.894	185.106	191.153	183.603	193.733	211.221	184.328	181.969	177.339	190.245	173.677	163.494	193.798	163.79	177.393	150.351	145.388	163.087	153.099	165.326	159.603	159.601	159.291
gene10297	tex47.L	0	0	0	0	0.285	0	0.075	0.082	0.061	0.121	0.043	0.083	0	0	0	0	0	0	0.034	0.04	0	0	0.054	0	0	0	0	0	0	0	0	0.082	0.04	0	0	0	0	0	0.106	0.054	0	0	0	0.051	0	0.12	0	0.048
gene10298	ascl2.L	0	0	0.098	0	0	0	0.212	0	1.115	1.791	0	0.175	0	0	0	0.047	0	0	0.711	1.194	0	0	0.228	0.076	0	0	0	0.175	0.122	0.059	0.059	0	0	0	0	0	0	0	0.224	0.076	0.296	1.123	1.426	0.072	0.439	0.169	0.327	0
gene10299	naf1.L	107.525	102.266	106.547	104.234	96.578	125.79	121.159	105.821	89.992	103.171	114.94	107.37	130.851	116.373	99.313	110.861	98.405	109.315	120.581	76.8	109.112	97.934	95.023	101.866	89.372	101.415	94.917	103.903	98.52	106.662	98.896	107.92	111.863	118.099	98.846	110.211	112.36	111.965	112.741	97.237	120.124	83.957	76.968	83.34	79.026	76.778	82.168	85.127
gene103	atp2b4.S	0.034	0.018	0.021	0.057	0	0	0.07	0.076	0	0	0.027	0.128	0.048	0.073	0	0.021	0	0	0	0	0	0	0	0	0	0	0	0.026	0	0	0	0	0.05	0	0.061	0	0	0	0.098	0.033	0.032	0.058	0	0	0	0	0	0
gene1030	epyc.L	0	0	0	0	0	0	0	0	0	0	0	0	0	0	0	0	0	0	0	0	0	0	0	0	0	0	0	0	0	0	0	0	0	0	0	0	0	0	0	0	0	0	0	0	0	0	0	0
gene10300	ttbk2.L	26.032	27.565	32.659	31.491	26.516	26.988	20.443	17.869	4.897	6.21	20.466	19.111	19.915	19.349	23.186	22.877	23.614	25.11	31.391	30.346	38.759	37.129	36.656	32.591	32.131	31.468	18.411	19.499	18.633	16.925	16.462	18.399	16.337	17.087	15.331	22.849	23.157	21.428	19.279	19.923	17.622	32.152	28.272	30.776	30.456	30.996	28.191	26.668
gene10301	kcnj8.S	0.23	0.18	0	0	0	0	0.079	0	0.771	0.383	0	0	0	0	0	0	0	0	0	0	0	0	0	0.679	0.076	0	0	0	0.091	0.264	0	0.344	0.425	0.18	0.104	0	0	0	0	0	0.222	0	0	0	0	0	0	0
gene10302	rho.S	0	0	0	0	0	0	0	0	0.251	0.499	0	0	0	0	0	0	0	0	0	0	0	0	0	0	0	0	0	0	0	0	0	0	0	0	0	0	0	0	0	0	0	0	0	0	0	0	0	0
gene10303	acat1.S	109.886	106.389	67.544	56.95	89.352	83.434	15.861	12.222	45.708	48.287	13.86	14.028	14.54	13.437	56.296	55.67	66.462	64.545	82.428	98.053	88.758	78.479	85.864	85.624	86.366	82.687	83.55	88.027	90.178	82.921	73.409	83.732	90.421	85.361	97.279	135.027	127.038	122.604	14.042	15.333	12.231	128.378	120.992	129.2	131.999	122.482	129.121	116.521
gene10304	slc35e3.S	15.687	16.614	17.411	18.863	17.634	16.134	20.112	18.419	6.206	4.82	18.458	18.342	19.185	18.158	17.694	18.035	19.391	18.634	17.608	19.018	17.929	19.482	17.625	18.403	18.044	17.82	16.392	18.532	18.15	17.28	18.117	16.231	16.979	17.43	20.035	19.094	20.396	19.291	18.334	20.227	17.898	20.462	20.059	18.094	19.517	20.544	18.608	16.85
gene10305	atp6v0a4.L	0	0	0	0	0.119	0.118	0	0	0	0	0.054	0.052	0.097	0	0	0	0	0	0	0.051	0	0.125	0.203	0.404	0.045	0	0	0	0	0	0	0.051	0	0	0.062	0	0	0	0	0.135	0	0.059	0	0	0	0	0	0
gene10306	pard3.L	32.751	31.981	35.838	32.42	35.793	33.57	27.843	26.532	28.095	29.561	29.142	27.889	33.939	30.986	29.1	32.111	36.183	31.047	32.567	37.094	28.399	26.202	25.441	23.806	23.545	25.659	23.425	23.926	23.514	23.397	22.105	25.467	24.796	24.44	23.338	29.583	30.336	25.388	32.3	24.806	30.936	39.074	41.559	39.642	44.019	39.538	41.516	43.347
gene10307	kif22.S	126.065	126.147	117.78	107.472	107.673	95.439	115.288	112.906	139.423	141.905	118.47	104.317	134.126	116.612	122.901	130.284	171.335	124.325	126.399	187.75	96.075	91.611	87.164	91.464	90.519	99.44	98.924	98.479	91.727	99.957	94.98	101.996	105.658	124.879	113.357	120.705	115.828	109.43	132.941	115.038	127.771	157.832	167.401	175.328	169.982	163.248	173.495	174.124
gene10308	<NA>	0	0	0	0	0	0	0	0	0	0	0	0	0	0	0	0	0	0	0	0	0	0	0	0	0	0	0	0	0	0	0	0	0	0	0	0	0	0	0	0	0	0	0	0	0	0	0	0
gene10309	cln8.L	7.263	6.633	7.765	13.187	1	1.318	9.259	10.107	3.635	5.421	9.597	9.58	8.95	10.915	20.48	22.683	21.274	23.268	22.035	17.57	0.921	1.485	0.663	1.131	1.209	1.709	6.2	6.755	8.208	6.889	6.347	7.732	7.923	5.991	6.731	6.111	5.958	5.808	7.535	9.829	8.485	7.823	8.517	7.079	5.745	5.91	6.188	8.497
gene1031	<NA>	0	0	0	0	0	0	0	0	0	0.11	0	0	0	0	0	0.123	0	0	0	0	0	0	0	0.195	0	0.266	0	0	0	0	0.077	0	0	0.078	0	0	0	0	0	0	0	0	0	0	0	0	0	0
gene10310	stat6.L	23.172	22.726	5.291	3.904	1.245	0.615	0.576	0.899	0.532	1.059	1.505	0.949	1.52	1.082	1.974	1.618	1.275	1.223	1.839	1.235	0.469	0.598	0.825	0.645	0.753	1.011	1.21	2.08	0.994	1.277	0.965	1.649	1.013	1.445	1.182	1.453	1.358	1.696	1.621	1.353	1.263	0.513	0.507	0.558	0.624	0.92	1.166	0.846
gene10311	<NA>	25.563	26.004	17.988	19.361	25.999	29.608	19.68	20.442	18.13	16.761	21.527	21.783	21.614	21.69	11.93	12.52	9.59	13.176	18.481	13.935	18.892	19.545	21.907	22.931	20.663	17.819	16.553	15.949	15.271	17.273	17.52	17.602	13.794	15.427	14.194	17.462	15.723	16.595	18.691	23.075	20.329	19.897	23.043	22.183	22.343	20.399	23.402	23.556
gene10312	psmd2.L	83.435	88.06	62.091	70.235	53.74	55.133	73.42	71.719	28.193	28.026	73.903	75.421	71.29	76.331	73.613	68.616	82.648	76.225	76.724	98.489	72.828	73.566	81.205	69.083	78.282	76.577	84.901	85.145	80.965	87.402	84.829	84.096	93.318	90.834	94.467	92.755	99.878	96.048	71.074	73.598	66.702	100.228	101.563	94.944	100.345	100.905	96.444	92.043
gene10313	rpl18a.S	147.885	152.283	137.316	150.34	70.988	55.584	100.599	97.037	103.505	99.364	98.652	94.747	86.826	110.753	100.859	105.866	113.811	116.874	122.213	123.836	94.993	93.71	87.958	88.88	87.999	94.99	110.558	105.669	96.274	101.142	108.392	88.112	114.456	98.995	108.598	127.795	143.669	144.566	118.861	102.2	97.947	103.173	104.461	107.31	107.189	109.937	88.053	104.577
gene10314	faf1.L	24.71	25.952	25.533	23.14	20.014	23.257	26.472	27.686	14.402	15.581	26.938	24.184	33.119	27.227	23.299	24.667	27.37	25.644	27.162	23.99	21.932	22.106	21.043	20.594	17.865	19.872	22.574	21.334	20.145	22.08	20.321	20.369	21.735	23.371	19.092	25.068	28.008	24.163	25.058	20.244	22.1	21.871	20.07	21.23	21.704	20.588	19.071	20.867
gene10315	rad9b.L	0	0	0	0	0	0.186	0	0	0	0.239	0	0	0	0	0	0.067	0	0	0.133	0.399	0	0	0	0	0	0	0	0	0	0	0	0.081	0	0	0	0	0	0	0	0	0	0	0	0	0	0	0.367	0
gene10316	aldh7a1.L	78.455	83.25	59.532	65.096	58.345	49.858	86.818	87.86	29.731	30.62	90.526	88.067	94.698	94.372	76.91	77.438	91.876	87.117	81.106	102.499	70.413	69.818	71.878	65.466	64.452	66.438	92.202	95.288	94.024	91.931	90.43	94.179	96.284	96.185	105.343	97.704	103.433	99.16	78.782	91.584	87.019	75.598	83.448	84.14	82.801	84.854	84.622	80.173
gene10317	mxra8.S	0.049	0	0.126	0	0	0	0	0.074	0.11	0.219	0.078	0	0.21	0.072	0	0	0	0.225	0.122	0	0	0	0.098	0	0.131	0.264	0.095	0	0	0.151	0	0.074	0	0.077	0	0	0.173	0.148	0	0.097	0	0	0	0	0	0.145	0	0
gene10318	bcl3.L	0.176	0.037	0	0	0.123	0.122	0	0	0	0	0	0	0.05	0	0.098	0	0.034	0	0.087	0.262	0.062	0.064	0.07	0	0.094	0.189	0	0	0	0	0	0	0	0	0	0	0	0	0.069	0	0	0.182	0.492	0.066	0.404	0.104	0.06	0
gene10319	myos.L	0.105	0.066	0	0	0	0.072	0	0	0.656	0.699	0	0.032	0.059	0	0.058	0.026	0	0.057	0	0.062	0	0.153	0	0	0	0.037	0	0	0	0	0	0	0	0	0	0	0	0	0	0.041	0	0	0	0	0	0	0	0
gene1032	mdm2.L	11.163	11.374	10.772	13.468	8.125	9.342	12.417	12.265	9.677	9.44	13.423	12.243	9.671	10.536	19.132	20.827	6.999	8.692	9.552	8.48	9.583	9.694	10.827	16.921	11.41	16	8.396	9.729	9.85	11.673	10.651	10.591	13.197	11.331	11.454	8.053	9.458	9.932	19.239	14.483	14.378	9.36	9.24	7.85	7.46	9.134	8.253	8.018
gene10320	cct6a.S	139.606	143.801	138.731	134.844	123.241	123.119	133.082	128.262	84.32	75.523	131.042	126.484	144.433	128.594	122.914	123.522	130.72	130.793	143.26	157.058	117.591	113.869	117.469	121.728	113.841	113.937	124.137	127.633	131.243	120.988	117.366	117.001	115.815	121.728	108.162	139.252	153.404	135.061	135.416	128.219	131.124	137.855	145.924	144.953	152.327	144.218	141.547	149.613
gene10321	znrd2.L	44.203	49.531	52.968	59.708	72.191	67.02	28.441	36.518	16.375	18.416	30.979	33.795	31.782	38.071	64.486	66.158	64.737	77.121	73.292	53.592	68.942	79.161	78.188	78.724	73.731	74.541	51.961	54.946	67.134	60.539	57.086	64.455	60.406	55.718	60.074	64.15	63.481	64.221	32.809	33.625	31.387	31.974	30.818	29.109	30.47	32.432	32.246	32.467
gene10322	<NA>	22.21	21.317	16.53	14.555	17.128	26.644	12.164	12.182	10.177	10.055	12.488	12.417	14.847	15.264	12.036	13.107	12.721	12.541	17.04	17.623	12.669	16.113	15.254	13.702	14.603	14.068	8.375	7.719	7.944	9.714	8.662	10.534	7.889	9.925	8.214	9.1	11.711	9.881	12.33	10.099	12.547	20.195	20.627	21.714	20.34	22.142	18.923	21.086
gene10323	nprl3.L	22.364	23.214	18.188	20.325	17.211	18.196	12.911	12.758	6.152	7.481	11.57	13.684	12.749	13.215	13.542	12.928	12.173	14.286	13.506	9.027	15.752	14.581	15.026	14.718	13.567	13.475	10.031	10.934	11.089	10.843	10.086	11.439	8.032	8.925	9.399	11.04	12.158	12.893	10.992	10.682	11.75	10.661	7.686	8.424	9.089	9	9.998	9.516
gene10324	rack1.S	287.651	300.641	293.834	309.601	169.843	105.257	287.782	287.002	146.089	143.477	279.784	285.112	271.79	293.244	250.969	252.314	288.545	289.522	286.805	297.084	212.559	211.171	226.164	198.076	226.967	221.522	292.774	275.635	270.456	298.127	297.665	273.732	289.664	303.234	318.79	318.936	350.521	340.148	320.504	302.708	245.568	273.579	285.141	254.428	258.176	274.057	258.967	256.276
gene10325	mark1.L	30.603	29.493	35.321	29.922	32.84	35.708	22.578	22.381	16.754	17.322	23.903	23.656	28.499	26.4	25.798	28.76	30.658	27.831	27.465	33.081	28.262	26.192	26.14	24.738	23.508	24.667	23.481	24.391	22.983	21.094	21.177	23.029	22.93	26.018	21.047	27.057	25.584	23.483	26.044	23.621	27.496	36.015	35.709	37.783	40.229	36.099	38.111	37.447
gene10326	elf5l.L	0.37	0.055	0.203	0	0	0.182	0.293	0.319	0.237	0	1.338	1.204	0.525	0.231	0.439	0.784	0.463	0.773	0.196	0.392	0	0.097	0	0.209	0.07	0.284	0	0.08	0	0.162	0.082	0.158	0.157	0.414	0.191	0.076	0.279	0.079	0.926	0.209	1.122	0.638	0.492	1.388	1.614	1.167	1.351	0.752
gene10327	<NA>	0	0	0	0	0	0	0	0.048	0	0.142	0	0	0	0	0	0.039	0	0	0.079	0	0	0.116	0	0.439	0.339	0.228	0	0	0	0.244	0	0.191	0.094	0.249	0.057	0	0	0	0	0	0.123	0	0.099	0	0.061	0	0	0.057
gene10328	psmc3ip.L	20.943	22.825	15.25	17.524	12.107	13.163	7.526	8.915	1.036	2.059	8.417	7.206	6.239	6.229	6.559	8.582	5.185	6.871	12.874	12.18	8.52	9.938	11.918	9.356	10.94	5.793	11.875	8.794	12.515	10.47	10.008	9.188	8.736	8.703	13.165	18.786	15.24	17.015	10.361	8.925	10.273	7.976	9.863	10.632	7.949	12.777	11.83	9.053
gene10329	tstd2.S	57.231	52.096	52.146	53.461	64.741	75.269	47.756	45.389	28.755	27.393	45.82	48.796	46.599	49.597	44.333	49.274	42.482	51.09	51.779	43.397	57.468	63.82	63.517	61.599	61.559	60.205	44.354	44.855	46.745	43.431	41.258	45.814	40.25	42.792	45.663	42.227	40.747	45.081	45.746	47.536	43.632	47.059	44.166	42.505	44.278	42.482	43.085	44.537
gene1033	ap4m1.S	14.406	17.233	23.346	19.589	15.117	11.242	16.396	15.03	6.466	6.06	16.712	13.48	16.576	14.954	13.811	13.114	13.19	13.312	15.514	19.646	12.519	12.975	13.9	10.013	13.358	11.661	8.873	10.29	9.06	7.85	8.543	11.441	11.794	13.261	10.288	14.65	14.789	15.361	16.393	11.266	12.349	17.002	16.122	14.011	17.331	16.288	14.279	16.956
gene10330	isoc1.L	10.727	11.468	14.815	15.984	14.67	14.092	8.012	8.782	6.768	7.463	7.1	9.044	7.343	9.557	8.232	8.266	8.356	9.153	10.37	10.685	19.842	23.188	22.84	19.572	22.844	21.884	8.328	8.943	7.93	10.328	8.065	9.381	9.025	8.775	9.559	11.475	11.328	11.416	7.682	7.617	7.798	13.275	14.026	12.805	14.79	13.707	12.159	14.159
gene10331	<NA>	0	0	0	0	0	0	0	0	0	0	0	0	0	0	0	0	0	0	0	0	0	0	0	0	0	0	0	0	0	0	0	0	0	0	0	0	0	0	0	0	0	0	0	0	0	0	0	0
gene10332	tcp11l2.L	11.749	11.064	13.691	15.071	7.878	10.246	8.473	9.279	21.946	19.613	7.896	9.63	9.081	10.032	10.3	10.924	7.643	10.77	9.48	6.668	8.336	7.35	9.655	9.73	8.259	8.786	11.127	11.174	10.778	11.881	11.629	12.082	11.645	12.047	11.486	11.046	11.03	11.952	8.64	8.308	7.075	8.434	6.848	7.022	7.751	7.555	7.023	7.434
gene10333	slc35e1.L	68.11	68.86	75.803	72.473	76.018	80.813	73.799	68.737	59.316	66.266	75.457	67.295	80.595	72.491	62.997	62.393	61.704	67.153	71.146	62.994	66.682	60.835	62.496	62.203	55.705	62.036	60.503	62.134	59.27	60.721	55.451	62.857	65.422	71.138	60.816	62.076	67.856	60.278	67.235	57.863	71.043	59.892	57.911	58.122	57.393	54.847	57.13	56.992
gene10334	<NA>	0.06	0.078	0	0	0.052	0	0.041	0.068	0	0	0.141	0.068	0.106	0.043	0	0	0.044	0.068	0.092	0	0.026	0	0.03	0	0	0.027	0.058	0	0	0	0.046	0.045	0	0	0.027	0.043	0.026	0	0.029	0	0.029	0	0	0	0	0	0	0
gene10335	stx18.L	49.66	50.192	41.955	41.382	44.315	40.268	31.482	31.786	11.158	10.484	32.409	36.314	32.374	33.989	31.826	27.528	28.415	30.142	45.687	50.436	46.943	51.431	53.446	45.805	48.941	50.563	30.556	30.216	26.293	25.143	25.427	25.892	23.866	24.085	25.166	37.885	34.19	40.794	31.781	37.557	33.751	40.731	38.959	36.379	38.195	40.43	39.575	40.691
gene10336	gria3.S	0.036	0	0	0	0	0	0.05	0	0	0.081	0	0	0.052	0.053	0	0.045	0	0.067	0	0.054	0	0.133	0.072	0	0.049	0.065	0.071	0	0	0	0	0	0	0.057	0.066	0	0	0	0	0	0.07	0	0.057	0.205	0	0.054	0.062	0
gene10337	ttc9b.L	0	0	0	0	0	0	0	0	0.103	0	0	0	0	0	0	0	0	0	0.114	0	0	0	0	0.182	0	0	0.09	0	0	0	0	0	0.068	0	0	0.066	0	0	0	0.091	0	0	0	0	0	0	0	0
gene10338	znf407.S	21.791	21.059	15.422	16.046	15.786	18.014	18.968	19.688	11.778	12.783	21.815	21.126	21.865	23.066	18.192	17.775	14.466	19.687	21.14	14.326	19.614	17.867	18.484	18.454	18.387	16.594	14.772	17.045	15.47	17.705	15.729	15.753	16.168	15.142	15.452	15.874	17.17	17.99	16.557	15.388	17.863	15.359	13.281	12.683	12.98	13.833	13.583	13.497
gene10339	calhm6.L	0	0	0	0	0	0	0	0	0	0	0	0	0	0	0	0	0	0	0	0	0	0	0	0	0	0	0	0	0	0	0	0	0	0	0	0	0	0	0	0	0	0	0	0	0	0	0	0
gene1034	gns.S	21.767	20.921	28.049	23.453	17.962	20.855	19.713	18.916	15.379	17.29	20.77	16.662	23.036	19.887	17.204	19.643	20.422	19.029	17.538	16.378	19.298	19.172	18.809	17.066	16.929	17.491	18.462	19.032	18.331	20.201	17.476	17.124	19.953	22.801	17.737	21.455	21.854	17.552	19.64	15.486	19.177	18.377	18.01	18.022	18.304	16.686	19.541	19.234
gene10340	rassf10.L	2.116	1.288	3.441	3.116	4.459	3.648	3.356	3.996	5.13	5.001	4.393	3.884	2.753	2.117	4.998	5.014	4.724	3.826	4.96	5.621	4.869	5.64	5.676	9.477	8.924	10.405	4.952	4.155	4.137	6.423	8.035	8.058	9.007	7.254	8.281	3.041	4.878	3.44	3.004	3.837	9.02	3.951	3.69	4.63	3.113	3.505	3.381	2.665
gene10341	dcdc2b.L	0	0	0	0	0	0	0	0.142	0.105	0.104	0	0.142	0	0	0	0	0	0	0.058	0	0	0	0	0	0.125	0.084	0	0	0	0.144	0	0.14	0.139	0.073	0	0	0	0	0	0	0	0	0	0.088	0	0.069	0.24	0.083
gene10342	c9orf85.L	9.059	8.829	6.679	9.49	6.278	7.653	5.522	5.302	1.678	1.535	4.127	4.693	5.108	5.194	4.106	3.337	4.237	5.07	5.563	5.07	8.52	8.607	8.913	6.863	7.95	8.313	5.46	4.879	5.248	4.739	5.236	5.348	4.796	4.607	4.551	5.776	5.426	7.922	5.256	6.052	5.211	6.617	6.555	5.794	5.725	5.786	5.469	5.174
gene10343	snrnp25.S	20.942	21.443	15.105	19.101	25.14	35.217	26.47	29.409	24.764	24.365	28.003	32.326	30.521	36.083	24.795	27.642	22.004	27.739	27.293	23.981	31.341	30.285	36.423	32.907	34.766	30.847	20.332	21.999	21.484	23.762	21.564	21.087	23.441	18.588	21.729	19.897	18.339	19.501	24.195	29.52	33.189	17.996	16.008	16.07	17.979	17.464	17.504	17.156
gene10344	gpbp1l1.L	85.709	79.416	93.84	91.641	80.62	87.401	92.536	86.616	36.016	35.264	90.765	89.332	99.168	93.845	78.385	75.809	83.408	87.286	83.446	90.115	86.56	84.758	78.445	82.102	80.781	83.303	76.338	75.283	72.807	74.008	66.87	70.167	74.439	74.766	65.293	77.289	80.124	76.585	87.46	83.231	84.434	89.99	86.182	89.015	83.66	85.479	83.825	84.032
gene10345	stac3.L	0	0	0.039	0	0	0	0	0	0	0	0	0	0	0.045	0	0	0	0	0	0.182	0	0	0	0	0	0	0.059	0	0	0	0	0	0	0	0	0	0	0	0	0	0	0	0	0.115	0	0	0.105	0.109
gene10346	<NA>	0.05	0.052	0	0	0	0	0	0	0.112	0	0	0	0.142	0.073	0.069	0	0	0	0	0	0.175	0	0	0	0	0	0	0	0	0.153	0	0	0	0	0	0	0	0	0	0	0	0	0	0	0	0	0	0
gene10347	cdh5.L	0.03	0.284	0.194	0.102	0	0	1.088	1.234	0.135	0.269	1.435	1.332	1.588	1.232	0.084	0.112	0.206	0.193	0.112	0.09	0.477	0.884	0.419	0.597	0.483	1.136	0.234	0.23	0.241	0.371	0.28	0.408	0.179	0.521	0.164	0.174	0.425	0.136	0.765	0.897	0.992	0.417	0.281	0.34	0.115	0.089	0.206	0.215
gene10348	icmt.S	20.155	22.111	12.026	14.009	21.166	24.167	20.223	23.069	12.795	10.867	23.421	22.96	22.226	25.052	15.719	16.005	17.351	19.234	19.988	22.671	25.924	30.627	30.376	30.028	30.954	27.536	18.921	20.946	19.13	20.462	21.554	21.991	20.821	18.435	16.577	18.666	21.237	21.63	20.215	21.534	20.253	18.386	17.452	14.83	18.479	17.03	18.441	15.387
gene10349	slc4a1.L	19.822	20.135	31.447	29.356	20.282	17.852	23.645	21.258	5.224	4.674	24.635	22.049	26.832	25.35	27.904	28.964	32.004	29.548	32.167	34.014	26.937	23.813	24.76	23.021	21.31	24.209	23.631	23.066	22.042	23.956	20.618	23.911	23.501	23.28	25.756	25.523	28.475	25.954	25.119	22.078	22.405	25.748	24.504	24.396	22.275	23.622	24.193	22.869
gene1035	cth.L	141.658	136.356	129.86	134.662	142.381	168.09	129.976	136.437	77.208	78.822	122.84	139.445	135.329	150.364	125.472	127.358	122.852	137.483	133.427	107.116	135.461	148.609	149.605	145.362	147.932	132.867	180.213	186.77	181.773	196.205	183.085	197.251	182.437	183.977	183.282	171.245	169.482	175.86	117.702	131.755	123.573	87.866	86.364	90.219	86.172	86.337	92.332	92.392
gene10350	c8b.L	0	0	0	0	0	0	0	0	0	0	0	0	0	0	0	0	0	0	0	0	0	0	0	0	0.175	0	0	0	0	0	0	0	0	0	0	0	0	0	0	0	0	0	0	0	0	0	0	0
gene10351	cyyr1.L	30.816	29.467	33.175	41.3	15.125	20.993	29.497	28.018	58.427	58.081	29.767	28.168	27.886	29.398	37.758	33.646	44.491	34.896	34.676	48.015	15.528	19.222	14.986	14.375	15.604	17.651	23.584	23.001	27.149	29.291	27.504	23.914	28.411	29.495	30.159	29.562	27.546	28.104	27.48	27.736	24.752	24.804	17.588	19.897	23.418	20.92	16.036	18.867
gene10352	lcmt1.S	4.701	6.793	6.848	8.275	6.81	8.476	5.505	6.774	4.207	3.539	5.032	5.163	5.336	6.629	2	3.397	3.311	3.634	4.738	7.291	5.959	5.551	5.873	6.418	7.897	6.594	5.462	5.276	4.256	3.216	4.133	5.309	6.424	3.626	5.747	7.481	7.239	8.247	6.053	4.863	5.862	5.11	5.044	4.882	5.658	4.898	6.038	4.115
gene10353	rassf8.L	16.807	16.477	13.812	10.532	16.801	11.758	10.608	10.518	10.149	9.464	12.678	10.307	12.872	11.919	12.687	13.257	18.565	13.074	16.822	22.624	16.705	17.092	17.62	15.741	15.826	16.534	16.069	13.148	14.093	13.589	13.36	12.169	17.542	15.262	13.716	18.743	17.969	15.617	14.1	9.666	13.504	24.056	28.881	29.143	29.39	25.107	25.164	28.698
gene10354	ufd1.S	48.08	53.76	35.8	54.563	34.574	44.712	45.132	48.846	32.546	33.178	45.565	50.234	42.46	51.623	44.316	43.747	45.034	47.142	58.525	50.958	37.842	48.081	50.463	39.465	48.238	42.734	34.982	41.12	41.995	38.504	37.06	40.39	42.379	42.101	42.663	44.192	50.924	51.017	42.2	49.104	48.634	42.467	44.94	43.257	40.309	47.33	42.464	45.137
gene10355	gsc.S	0.683	0.446	1.093	2.012	0.893	0	14.181	19.092	41.079	45.204	22.146	19.065	0	0	14.048	14.039	0	0.234	4.117	6.33	2.994	2.809	3.044	5.726	2.502	6.107	8.929	8.956	9.235	14.274	13.716	13.432	16.686	13.381	10.64	0.613	1.5	1.025	11.635	11.652	29.664	1.324	2.25	2.082	3.259	1.131	1.018	0.607
gene10356	mgc108429.L	7.426	9.024	8.983	8.083	7.861	8.407	7.619	7.647	7.689	5.917	7.947	7.183	7.445	7.418	8.684	9.774	10.798	10.261	9.273	10.079	5.052	8.17	5.928	6.194	7.577	6.936	6.439	6.066	7.934	8.387	9.074	7.141	8.259	7.99	6.539	7.91	8.111	7.706	7.696	10.011	7.915	8.723	9.792	10.531	10.365	9.955	9.633	11.498
gene10357	sgpp2.L	2.415	2.901	4.593	4.632	4.471	4.14	3.1	3.017	0.272	0.33	2.689	2.849	2.106	3.063	1.138	1.034	1.039	0.875	1.552	0.78	1.987	1.381	1.39	1.464	1.563	1.954	1.098	0.738	0.816	0.89	0.688	0.768	0.899	0.782	1.048	0.931	0.995	0.81	2.89	2.776	1.485	2.209	2.782	2.556	2.446	3.159	2.69	2.544
gene10358	c1qtnf1.S	0	0	0	0	0	0	0	0	0	0	0	0	0	0	0	0	0	0	0	0	0	0	0	0	0	0	0	0	0	0.073	0	0	0	0	0	0	0.084	0	0	0	0	0	0	0	0.183	0	0	0
gene10359	fkbp8.L	44.885	45.25	35.2	40.641	26.298	30.054	36.808	40.714	12.588	10.875	36.378	42.141	38.616	46.365	31.598	30.11	28.577	34.576	33.717	34.279	34.491	38.646	41.655	38.163	42.674	37.283	34.791	35.592	36.68	34.556	37.985	34.33	37.672	35.493	36.914	37.705	38.638	40.04	33.312	36.698	35.13	29.997	31.405	31.26	31.026	30.354	31.116	30.062
gene1036	p2rx5.L	0	0	0	0.315	0	0	0.216	0.236	0	0	0.049	0.047	0.044	0	0.173	0.232	0.243	0.114	0.116	0.231	0.219	0.171	0.062	0.062	0.083	0.112	0.121	0.095	0.099	0.096	0.241	0.234	0.046	0	0.056	0	0	0	0	0.062	0.12	0.054	0	0	0	0	0.053	0
gene10360	mrpl28.L	43.837	44.462	50.765	57.198	37.097	41.516	35.281	40.299	6.674	7.886	33.018	39.831	31.142	39.381	29.565	27.339	26.095	29.716	39.934	31.705	26.736	31.572	37.342	29.966	33.873	27.569	39.012	37.724	33.118	36.767	33.029	33.724	31.158	35.451	33.436	32.019	32.119	42.474	31.769	36.283	37.036	29.482	28.171	26.171	29.64	32.561	26.178	25.917
gene10361	nuggc.L	16.6	16.552	9.618	9.853	11.423	11.29	23.247	20.003	12.766	13.15	22.008	19.826	21.557	23.728	10.132	9.466	9.516	9.233	9.432	7.694	1.711	1.406	1.524	1.74	1.325	1.611	15.827	14.121	14.477	15.471	14.407	14.129	18.573	16.234	13.659	16.085	22.313	17.136	18.724	12.991	19.288	15.783	17.059	16.981	16.117	15.377	16.214	16.786
gene10362	prpf31.L	62.123	62.629	53.183	54.943	93.412	104.495	62.957	61.459	51.24	53.391	54.985	62.861	64.861	62.588	137.678	130.52	141.411	138.782	129.277	150.784	55.847	63.135	63.1	62.739	66.983	60.191	126.366	139.837	128.214	137.299	124.166	137.827	125.542	135.932	136.496	118.231	125.14	129.564	55.228	58.64	61.738	66.38	62.227	62.302	60.54	65.48	64.282	65.668
gene10363	kiaa1328.L	54.906	55.977	68.084	54.723	56.077	47.478	33.083	33.731	26.202	26.991	36.748	35.57	39.687	37.073	43.533	37.125	53.193	46.392	40.878	68.903	33.823	33.04	25.958	26.444	28.359	32.217	37.83	38.273	36.091	34.149	37.202	40.358	39.16	44.019	38.787	46.463	47.734	40.693	44.644	37.917	39.11	85.108	84.438	85.897	78.731	83.162	82.809	76.166
gene10364	<NA>	10.358	12.445	14.641	14.998	21.214	19.099	6.667	6.823	51.474	49.562	6.19	6.311	5.725	5.695	10.49	10.869	13.551	11.553	13.252	17.499	9.607	11.225	8.588	8.432	9.864	9.69	14.577	13.273	13.314	10.067	10.231	11.548	12.035	14.438	8.048	15.142	17.027	11.566	7.62	6.55	8.484	31.445	29.492	30.828	36.2	28.726	28.937	32.874
gene10365	mindy1.L	33.72	36.164	46.714	42.519	42.445	34.586	31.627	26.899	21.272	22.454	31.635	27.89	35.458	30.95	36.132	34.833	42.201	37.596	38.243	43.751	34.471	37.914	33.243	37.679	31.298	33.661	21.286	24.429	25.069	23.935	23.148	22.268	22.004	26.931	25.78	26.16	28.006	24.254	31.586	31.539	29.104	48.88	47.654	47.556	46.447	46.228	49.545	49.665
gene10366	<NA>	142.672	138.782	130.236	143.775	131.641	131.542	144.077	151.762	98.375	99.638	153.092	151.694	149.483	158.701	135.325	133.099	137.13	144.212	135.776	177.958	143.821	147.952	152.313	146.417	165.367	154.984	159.505	165.304	166.635	154.825	163.61	149.257	150.308	141.167	175.722	157.561	150.193	169.028	145.976	170.782	145.847	163.393	159.028	154.617	178.087	158.4	172.161	157.531
gene10367	<NA>	4.97	5.399	1.687	4.096	1.415	1.399	2.106	3.524	2.496	0.677	1.444	1.695	4.03	1.181	1.823	2.382	1.581	3.706	2.633	4.06	1.067	1.297	1.406	2.4	2.026	1.813	1.178	2.313	2.097	1.867	1.253	2.127	3.003	1.113	2.015	2.915	0.891	3.5	1.382	3.21	2.153	0	0	0	0	0	0	0
gene10368	lgalsl.L	21.522	21.249	17.584	13.949	12.046	13.536	11.925	10.93	16.921	18.034	11.672	11.21	12.948	11.637	11.912	12.808	11.404	15.411	14.652	13.098	10.899	11.76	9.002	11.329	10.312	10.595	13.658	10.942	13.473	13.159	12.298	10.349	15.07	15.154	11.49	13.999	17.558	14.729	10.616	9.132	11.507	8.959	8.508	7.567	7.285	8.404	7.248	9.374
gene10369	XB5827395.L [provisional]	14.041	12.833	34.866	36.784	0.265	1.047	0.84	0.573	0.34	0	0.24	0.576	0.538	1.215	34.838	44.848	43.55	34.947	38.659	45.237	40.184	51.043	48.409	42.661	56.299	48.31	33.51	29.766	32.836	32.477	39.389	34.796	34.607	31.994	35.639	32.389	26.259	37.013	0	0.751	0.293	0	0	0	0	0	0.129	0
gene1037	boc.L	16.229	16.542	17.41	13.431	19.155	13.102	9.153	9.79	5.188	6.256	8.986	9.41	11.514	9.926	14.792	15.857	17.883	14.271	17.362	23.216	11.927	12.606	11.631	10.007	10.3	10.771	9.531	7.713	8.433	8.073	6.868	9.879	9.368	9.946	8.717	13.543	13.75	10.55	13.503	9.471	10.123	18.798	19.114	20.989	23.427	18.494	20.433	20.613
gene10370	gpt.S	23.427	25.148	38.525	35.975	29.36	26.409	49.004	43.063	14.55	13.87	46.135	41.671	46.766	49.441	76.969	80.603	102.003	81.621	82.977	99.908	39.508	32.638	36.17	34.959	31.435	41.328	66.064	67.091	64.393	73.907	66.796	70.597	70.55	77.261	74.723	80.694	89.558	74.181	55.229	33.648	51.919	36.151	34.927	39.337	36.973	36.393	39.767	39.123
gene10371	klhl20.S	42.844	43.991	49.415	49.699	44.764	48.863	44.905	43.821	18.828	19.376	44.791	43.508	52.384	49.474	42.15	43.088	42.717	41.673	44.159	47.818	44.186	45.872	41.935	41.118	38.524	39.903	39.649	39.154	41.933	40.453	32.958	39.055	39.583	41.879	38.188	41.916	45.395	41.957	38.404	33.843	39.095	41.148	39.222	43.131	41.263	42.686	39.325	42.687
gene10372	lmo4.1.S	38.762	39.169	39.364	42.674	40.812	32.857	36.451	32.655	16.09	13.724	30.886	34.834	35.501	36.152	29.354	34.82	37.263	33.585	40.557	49.206	39.46	39.656	37.926	36.755	36.887	37.809	37.242	35.702	35.327	34.781	34.634	33.021	34.896	36.339	34.425	44.017	45.881	43.606	34.954	36.858	32.52	47.735	50.315	50.825	51.237	50.805	47.707	50.919
gene10373	wdfy2.S	13.554	14.379	15.463	13.806	14.249	13.376	11.095	9.271	2.333	2.471	10.542	9.502	13.315	12.036	9.689	10.734	12.622	10.993	11.749	10.517	13.844	13.963	12.493	12.001	12.064	13.08	14.133	14.602	14.246	14.182	13.543	14.11	14.828	14.571	12.533	16.995	16.42	15.799	11.247	9.33	11.051	13.638	13.457	16.026	13.863	14.621	13.194	14.164
gene10374	yrdc.L	83.279	82.635	79.922	81.588	74.628	84.44	64.858	68.786	73.509	71.471	79.467	78.401	80.961	83.641	86.901	87.364	97.551	101.059	88.128	94.687	97.374	101.11	104.456	106.347	101.55	106.265	105.675	115.914	107.71	115.183	104.595	110.686	106.918	116.619	114.362	110.652	106.212	110.423	71.664	92.612	87.04	102.797	113.439	108.412	109.985	109.832	109.746	96.013
gene10375	mcam.L	16.811	15.362	0	0	0.12	0	0	0	0	0.076	0.054	0	0	0	5.787	3.902	4.713	4.639	6.193	6.308	0	0.063	0	0	0.046	0	5.315	5.789	5.784	5.262	6.306	6.271	4.267	4.14	5.267	4.585	5.604	7.619	0	0	0	5.203	7.232	6.627	6.548	5.961	7.308	5.43
gene10376	lrrc14.L	22.549	24.45	33.928	28.712	28.79	16.374	26.741	23.269	18.058	18.566	25.16	25.775	23.949	22.207	33.088	33.633	38.364	33.408	33.693	35.21	29.912	28.4	26.58	25.283	25.546	25.064	18.127	18.435	20.023	22.561	21.296	22.592	24.644	26.231	23.735	22.461	26.806	20.343	29.713	27.725	26.433	34.251	39.379	39.086	40.217	36.662	33.16	35.997
gene10377	thumpd1.L	11.15	10.092	7.877	9.773	8.406	10.01	3.697	3.071	15.529	16.342	3.49	3.881	3.626	3.126	8.511	6.928	7.185	9.471	11.201	9.385	6.16	7.058	8.283	7.273	8.082	7.217	14.114	12.845	12.332	12.024	11.257	12.747	12.467	10.511	13.215	12.433	11.984	12.331	2.6	3.388	3.475	8.507	8.686	10.183	9.143	10.303	9.55	9.398
gene10378	znf33a.L	11.926	13.658	24.829	26.035	22.26	27.557	87.166	97.586	9.232	10.181	99.4	93.508	28.265	28.7	88.144	85.587	16.705	23.557	26.539	17.491	50.856	55.841	55.035	31.784	28.416	34.232	69.532	75.551	70.03	46.764	52.971	61.716	41.323	54.45	44.473	23.063	18.114	18.959	68.895	84.529	60.343	24.107	24.977	24.056	21.406	23.823	24.935	21.78
gene10379	<NA>	5.353	6.128	5.172	5.147	13.812	11.486	3.893	4.291	3.239	2.855	4.06	3.692	3.72	3.854	4.116	4.355	5.747	6.213	6.348	6.317	13.502	13.326	13.2	12.173	12.002	12.403	8.25	5.936	7.645	7.372	7.255	5.524	7.884	7.147	7.596	8.005	9.305	6.27	3.668	3.997	4.691	5.93	5.587	5.838	6.671	4.704	5.771	5.391
gene1038	<NA>	0.042	0	0	0	0	0	0	0	0	0	0	0	0.059	0	0	0	0	0	0	0	0	0	0	0.082	0	0	0.081	0	0	0	0	0	0	0	0	0	0	0	0	0	0	0	0	0	0	0	0	0
gene10380	tom1.S	45.165	44.68	51.411	49.558	48.976	50.292	36.55	38.299	16.131	18.467	37.173	39.282	41.158	41.754	39.252	34.083	40.205	46.974	45.574	58.505	37.913	44.829	41.078	36.587	36.898	35.429	43.996	42.637	41.299	38.145	37.519	34.448	41.221	44.544	43.005	51.494	49.92	49.522	37.444	31.352	33.695	38.211	36.218	37.543	38.924	37.977	37.724	37.484
gene10381	mettl21ep.L	0.106	0.074	0.045	0	0	0	0.098	0.053	0	0	0.056	0	0.05	0.051	0	0.087	0	0	0.131	0	0.124	0.129	0.279	0.069	0.047	0.126	0	0	0.056	0.054	0	0.053	0.261	0	0	0.051	0	0.053	0	0	0.136	0	0	0	0.067	0.052	0.06	0
gene10382	rnf8.L	49.411	48.804	56.127	52.013	51.883	44.87	55.434	55.999	26.942	27.596	57.944	58.799	60.251	61.467	49.602	52.226	59.36	51.351	52.607	63.452	48.041	50.692	48.484	56.089	51.513	52.102	50.055	49.161	47.756	50.91	49.2	49.733	59.566	59.375	59.839	58.6	60.224	54.703	52.1	56.187	59.184	70.864	73.556	69.679	66.489	68.171	71.731	76.263
gene10383	fau.L	75.013	83.475	68.684	76.326	41.656	29.607	37.516	39.939	51.347	49.252	35.866	41.988	38.464	46.857	47.866	48.771	53.598	44.87	51.263	53.918	30.113	23.052	30.036	42.08	35.741	35.27	43.656	39.165	36.285	33.752	39.381	37.998	56.022	46.053	52.347	64.784	76.828	73.496	54.597	40.606	67.339	30.757	36.812	41.018	42.255	37.341	30.87	40.804
gene10384	slc49a4.L	27.546	29.313	28.534	21.679	32.516	33.026	27.652	24.276	22.643	23.186	26.301	23.339	28.75	27.229	23.414	25.278	31.489	25.786	27.423	34.346	34.124	31.12	29.508	31.321	28.199	31.536	19.64	18.444	19.187	18.249	16.353	21.161	20.32	20.886	19.29	21.304	20.404	18.417	27.45	24.09	24.729	31.042	32.309	31.23	29.771	29.693	28.977	29.364
gene10385	wasf3.L	34.408	33.771	42.028	39.644	48.244	47.178	37.069	32.785	21.327	21.418	34.938	31.922	41.682	38.684	38.111	37.581	50.709	44.474	45.5	56.668	38.644	40.552	42.308	35.28	32.479	37.402	31.328	30.09	34.05	31.333	31.782	30.316	37.553	36.228	30.1	34.762	42.317	34.323	38.82	35.573	34.148	42.62	42.42	42.619	42.906	43.464	43.641	44.499
gene10386	stx5.S	74.058	71.643	86.281	86.531	95.033	91.281	84.986	81.289	24.876	22.391	80.938	81.234	87.821	85.047	77.295	71.961	73.485	75.857	87.66	77.976	84.761	86.436	90.564	84.431	86.728	82.108	76.951	80.744	81.659	75.701	74.927	79.341	71.396	81.023	70.233	87.996	91.583	88.501	76.964	77.953	72.248	92.795	87.338	93.469	87.638	88.444	87.07	85.398
gene10387	mcmdc2.L	2.996	2.234	6.259	6.379	0	0	0	0	0.068	0	0	0	0	0	6.89	7.748	7.148	6.955	6.614	5.802	11.416	8.828	10.598	10.552	10.26	9.238	13.912	10.177	10.26	12.519	12.75	11.359	8.871	11.067	10.877	10.542	12.188	11.193	0	0	0	8.008	7.534	6.077	6.885	7.607	6.512	5.165
gene10388	<NA>	0	0	0	0	0	0	0	0	0	0	0	0	0	0	0	0	0	0	0	0	0	0	0	0	0	0	0	0	0	0	0	0	0	0	0	0	0	0	0	0	0	0	0	0	0	0	0	0
gene10389	pals1.L	30.311	32.328	35.106	29.993	34.713	38.093	24.799	23.697	13.04	14.941	25.016	24.801	28.459	27.501	27.493	25.869	29.326	27.329	28.772	30.129	28.328	27.213	26.909	26.83	24.618	27.977	23.193	23.527	22.962	23.07	24.052	24.577	24.145	23.305	22.758	30.665	28.311	24.161	27.33	24.586	25.745	31.205	35.424	34.736	34.23	29.947	34.788	31.391
gene1039	ing2.S	59.673	61.37	59.679	61.807	62.02	62.017	53.311	50.771	12.766	12.505	51.171	54.838	51.112	54.528	57.227	51.323	61.134	62.354	60.028	71.495	55.41	63.012	60.544	62.089	59.504	62.84	58.625	58.046	59.478	65.59	59.431	57.71	45.805	50.77	53.471	49.362	50.9	51.051	53.99	59.546	56.019	81.739	81.061	82.072	81.854	87.123	82.241	74.049
gene10390	<NA>	0	0.037	0.091	0	0	0	0	0	0.158	0	0	0	0	0	0	0.087	0	0	0.175	0.21	0.062	0	0	0.07	0.047	0.063	0	0	0	0	0.055	0.053	0	0	0	0	0	0	0	0	0.068	0.366	0.11	0	0.135	0.104	0.06	0.252
gene10391	pfkfb4.S	35.651	37.566	44.473	41.192	35.475	35.063	47.393	41.749	24.763	24.806	46.13	45.179	45.111	45.448	43.423	40.829	47.006	45.68	43.891	55.355	47.586	51.241	49.669	44.87	45.745	48.074	49.713	54.549	50.159	52.78	49.565	51.528	49.433	57.171	54.643	55.789	54.222	53.079	42.297	45.334	43.252	58.426	62.689	56.658	55.828	59.616	57.589	56.608
gene10392	XB989596.S [provisional:ifit5]	0	0	0	0	0	0	0	0	0	0	0	0	0	0	0	0	0	0	0	0	0	0	0	0	0	0	0	0	0	0.163	0	0	0	0	0	0	0	0	0	0	0	0	0	0	0	0	0	0
gene10393	XB5960368.L [provisional:eva1c]	0	0	0	0	0	0	0	0	0	0	0	0	0	0	0	0	0	0	0	0	0	0	0	0	0	0	0	0	0	0	0	0	0	0	0	0	0	0	0	0	0	0	0	0	0	0	0.049	0.103
gene10394	ccdc17.L	0.057	0.035	0.015	0	0.119	0.117	0.188	0.103	0	0	0.125	0.155	0.129	0.049	0	0	0	0	0	0.017	0.099	0.145	0.135	0.112	0.136	0.101	0.11	0.121	0.144	0.07	0.088	0.136	0.134	0.355	0.061	0.179	0.1	0.119	0.066	0.045	0.044	0.02	0.035	0.043	0.043	0	0.039	0.04
gene10395	<NA>	0.458	0.638	1.173	0.685	0.888	2.106	1.48	1.769	0.114	0	2.094	1.237	1.084	1.482	0.07	0.189	0.248	0.977	0.567	0.604	0.446	0.651	0.504	0.904	0.339	0.728	0.493	1.625	2.187	1.249	1.416	0.763	0.905	1.117	0.368	1.683	1.252	1.834	2.379	1.208	1.474	1.316	1.815	0.382	1.069	1.574	1.128	1.268
gene10396	tmco3.L	9.006	8.634	8.448	9.669	7.391	8.359	7.868	7.665	9.347	11.558	7.186	7.428	7.373	7.53	5.86	5.869	5.022	5.696	6.272	6.042	9.216	10.128	10.736	10.247	11.125	8.926	6.313	6.938	7.162	7.875	7.113	7.327	6.516	6.482	5.777	5.943	6.549	5.931	6.664	6.569	7	5.197	6.379	5.235	5.211	5.01	5	5.073
gene10397	tal1.L	0.064	0.1	0.733	1.285	0	0	0.22	0.048	0	0	0	0.048	0	0.046	0.264	0.039	0	0.029	0.197	0.802	0.167	0.174	0.252	0.063	0.169	0.114	0.062	0.048	0.101	0	0	0.048	0.047	0.15	0.115	0	0	0	0.31	0.126	0.246	0.164	0.296	0.06	0.061	0.094	0.271	0.283
gene10398	siva1.S	448.714	461.773	348.597	410.663	367.297	325.24	316.606	316.288	51.471	40.773	287.324	314.163	286.612	335.182	242.734	231.921	240.71	285.332	331.026	254.444	397.266	476.188	472.353	448.685	526.248	462.993	331.633	340.087	344.135	333.208	351.948	343.274	299.556	302.446	361.537	379.812	352.203	415.527	318.343	384.91	280.587	380.608	373.762	352.148	398.498	393.958	378.787	360.769
gene10399	mob2.2.S	60.497	57.328	66.844	70.591	47.323	51.744	36.921	37.134	16.573	15.746	34.829	34.247	46.782	51.782	42.41	43.511	60.404	60.539	73.658	69.191	56.764	58.813	62.059	61.402	69.393	69.025	59.528	62.37	56.817	52.574	56.693	55.876	49.487	50.124	54.925	72.986	70.908	70.125	35.472	53.538	38.837	58.398	62.17	57.031	57.414	59.542	57.408	56.061
gene104	llgl1.S	56.246	57.173	66.881	58.265	50.553	34.78	51.722	48.266	46.793	46.2	57.529	45.791	59.884	55.716	65.256	73.132	85.178	69.343	74.865	89.362	41.477	35.057	37.247	37.599	33.683	37.855	56.867	53.855	55.071	54.773	55.015	55.955	62.828	66.951	54.318	68.123	78.982	60.483	64.175	49.836	58.095	88.891	91.321	91.352	93.509	91.669	89.105	90.415
gene1040	clns1a.L	184.439	188.797	177.278	193.207	185.856	159.204	213.967	206.518	42.925	46.464	208.543	198.13	209.897	229.272	191.936	179.873	208.331	199.657	194.469	218.05	173.381	186.449	179.292	183.839	190.934	180.383	177.756	210.597	206.799	201.802	197.967	199.479	193.533	198.625	208.634	183.136	175.433	196.16	206.633	231.009	200.751	219.412	217.143	202.245	217.752	222.18	194.432	220.079
gene10400	<NA>	2.349	2.42	0	0	0	0.105	0.169	0.046	0.41	0.679	0.048	0.185	0.13	0.089	0.844	0.943	0.446	1.003	1.81	1.312	0.535	0.39	0.423	1.143	0.366	0.436	0	0	0.146	0	0.047	0	0	0	0	0	0	0	0.119	0.181	0.118	0.105	0.378	0.4	0	0	0.052	0
gene10401	<NA>	6.841	6.068	9.693	9.19	8.91	7.693	9.306	8.561	4.073	3.396	9.194	9.231	10.041	9.142	9.255	9.219	8.152	8.61	7.949	8.227	7.567	8.692	8.724	8.281	7.937	7.927	7.619	8.346	6.538	8.06	6.939	8.182	6.955	8.052	7.318	7.467	7.838	6.785	8.688	7.375	7.48	5.92	5.552	4.515	5.379	5.144	5.053	6.474
gene10402	<NA>	2.906	3.466	2.302	1.164	1.207	0.477	1.532	2.404	0.31	0	1.641	2.312	1.669	2.114	1.052	2.224	1.348	0.948	1.454	0.718	0.606	1.011	0.822	1.774	1.566	1.113	1.206	0.421	1.1	2.016	1.71	1.451	2.048	1.301	1.499	0.497	0.851	1.453	1.751	2.737	2.938	1.908	2.466	1.816	2.112	1.426	1.533	1.722
gene10403	cops2.S	39.802	40.366	40.288	48.08	35.076	56.052	38.567	43.094	24.395	24.983	36.862	44.396	40.142	50.662	39.371	36.249	30.992	35.762	43.514	32.955	36.166	34.094	39.095	43.188	41.24	39.237	39.767	39.073	38.418	33.657	30.049	33.231	36.663	30.119	36.493	33.692	32.764	35.609	32.018	39.964	37.004	26.077	26.365	26.525	24.751	27.329	29.628	23.731
gene10404	agtrap.L	60.844	56.481	50.135	53.366	39.872	51.485	56.395	57.939	33.212	29.735	58.464	63.711	64.491	66.661	54.551	45.471	57.208	64.598	48.21	57.133	55.112	61.493	62.817	64.363	68.505	63.295	66.767	59.557	65.837	72.815	68.348	64.364	56.502	58.365	68.595	66.627	58.932	66.676	57.967	75.484	54.98	59.418	58.437	56.53	55.594	55.514	58.123	54.753
gene10405	<NA>	23.676	25.587	18.543	17.097	0.079	0	13.434	14.048	0.051	0.303	14.239	13.985	16.734	16.3	2.54	1.43	2.165	2.776	2.916	3.127	9.224	7.999	7.187	5.904	6.493	8.312	0.527	1.482	0.757	2.191	0.771	0.612	0.537	0.675	0.737	0.326	2.071	1.089	15.673	11.662	15.232	13.523	13.532	14.757	16.316	14.458	13.371	15.405
gene10406	<NA>	0.925	1.086	1.776	4.865	0.403	0.199	0.56	0.612	0.518	0.129	0.549	0.527	0.41	0.252	1.279	1.001	0.507	0.898	1.859	2.143	0.507	1.479	0.458	1.483	1.925	1.861	2.911	1.934	1.931	2.749	2.233	2.339	1.113	1.903	1.671	2.077	2.437	2.95	0.45	0.229	0.335	1.096	0.986	1.301	0.662	1.192	1.084	0.514
gene10407	slc41a3.S	0.58	0.379	1.253	0.244	0.759	0.5	1.104	0.329	0.812	0.968	0.746	0.606	1.029	0.686	0.251	0.179	0.53	0.331	0.359	0.215	0.382	0.199	0.144	0.143	0.193	0	0.14	0.11	0.115	0.056	0.112	0.054	0.054	0.057	0.066	0.052	0	0.054	0.777	0.861	0.98	0.875	1.068	1.156	0.831	1.122	0.989	0.903
gene10408	pag1.L	36.429	35.242	25.42	24.926	37.921	35.154	27.166	27.698	21.594	24.266	29.282	28.123	32.097	33.123	27.364	27.241	30.246	31.148	31.528	34.781	31.884	31.204	31.762	29.465	30.828	32.909	27.66	27.369	27.883	24.172	22.653	24.734	26.925	29.158	28.596	29.932	28.833	27.181	29.794	28.827	31.441	30.651	30.082	30.411	33.246	30.591	32.079	32.211
gene10409	rgp1.L	20.968	20.893	25.29	23.452	22.095	15.505	17.71	17.992	10.915	12.964	17.532	16.068	19.686	20	22.771	20.595	24.068	21.645	24.905	37.287	24.321	30.215	25.096	25.362	23.452	23.219	22.203	19.933	18.942	15.739	18.786	18.602	16.974	18.266	16.131	23.665	27.257	23.574	20.964	19.795	17.728	32.423	34.068	28.154	34.212	32.271	31.844	28.049
gene1041	cfp.L	0.318	0.265	0.813	0.214	0.665	0	0.703	0.768	10.803	13.989	0.402	0.675	0.901	0.924	1.405	1.099	0.619	0.638	1.335	1.601	0.111	0	1.384	1.002	1.607	1.817	0.369	1.062	0.606	1.559	1.374	1.332	1.787	1.394	0.688	2.191	1.116	1.525	0.866	0.377	0.49	0.766	1.181	0.834	1.334	1.122	0.758	0.904
gene10410	rpl39.S	170.601	169.481	146.41	171.792	106.343	92.117	71.119	87.985	112.686	130.307	72.057	83.253	66.596	97.192	81.464	79.616	65.077	94.204	115.622	63.489	64.862	75.752	67.857	79.049	48.815	56.351	107.468	97.899	118.784	78.285	109	82.634	80.638	63.347	76.098	116.656	94.456	141.362	102.034	81.982	74.714	73.797	74.862	70.022	78.452	72.63	63.045	58.48
gene10411	ubl3.S	43.771	48.595	48.736	48.618	57.709	52.296	44.244	42.883	26.248	30.603	47.294	44.322	48.548	48.513	45.75	46.501	57.666	47.695	48.43	71.231	54.267	55.313	56.367	54.409	52.119	53.21	38.209	40.67	38.927	42.2	41.604	42.689	44.111	45.218	43.873	46.245	47.051	42.917	44.754	44.108	49.123	59.585	57.907	61.782	65.637	59.434	61.261	60.452
gene10412	<NA>	0.088	0.092	0.563	1.184	0	0.303	0	0.266	0.787	0.783	1.113	1.069	0	0.896	2.432	1.196	1.8	2.491	1.631	0.913	0.154	0.482	0	0.347	0.234	0.157	1.022	0.669	0.42	0.675	0.408	0.527	0.912	0.551	0.318	0.379	0.463	0.396	1.027	0.348	0.34	0.91	0.682	0.33	0.504	0.389	0.899	0.469
gene10413	bet1l.S	7.725	7.88	10.593	14.225	15.251	14.069	10.973	11.054	9.132	11.217	9.865	10.759	11.375	10.306	11.244	9.982	9.882	11.851	12.649	13.96	21.719	22.693	22.692	22.593	24.068	20.952	10.556	12.894	12.843	11.132	11.751	10.35	9.839	9.547	10.476	10.345	9.01	10.016	11.746	11.934	10.239	23.761	20.285	22.958	20.805	24.935	25.531	22.185
gene10414	<NA>	0.02	0	0.052	0	0.143	0	0	0	0.046	0	0.065	0.031	0	0	0	0	0	0	0	0	0	0	0	0.04	0.027	0.037	0.04	0.031	0.033	0.063	0	0	0.03	0	0.037	0.059	0	0.031	0.04	0	0.04	0.071	0	0	0.039	0.03	0	0
gene10415	lsm11.S	27.34	25.842	35.913	26.329	26.161	23.632	11.832	11.21	10.828	8.252	10.459	10.167	10.528	11.03	9.924	11.864	19.877	13.778	23.63	30.371	26.298	25.498	21.247	23.381	22.447	25.234	17.023	19.124	20.268	12.616	12.581	12.325	12.059	16.303	8.885	23.755	26.203	23.356	15.543	15.631	9.962	37.248	40.873	40.531	44.326	45.359	42.465	34.562
gene10416	cul4b.S	119.454	120.001	121.284	112.041	109.862	136.754	124.213	123.088	66.471	69.068	125.68	113.619	139.357	125.861	112.494	116.714	114.213	122.327	120.048	117.004	114.09	111.656	106.874	105.839	99.372	109.57	108.31	109.662	110.637	111.694	104.507	111.284	116.4	118.793	104.106	110.358	119.66	111.771	106.009	96.702	124.179	102.522	101.065	98.114	98.59	99.696	99.53	96.083
gene10417	<NA>	0	0	0	0	0	0	0.074	0	0.602	0.718	0	0	0	0	0.074	0	0.052	0.049	0.067	0.08	0.094	0	0	0	0	0	0	0	0.171	0	0	0	0	0	0	0	0.095	0	0	0	0	0	0	0	0	0	0	0
gene10418	ttc7a.S	0.148	0.088	0.23	0.071	0.037	0	0	0.048	0.26	0.071	0.05	0.032	0.09	0.046	0.058	0.052	0.072	0.039	0.091	0.016	0.037	0.019	0.063	0.021	0.014	0.057	0.061	0.032	0.034	0.049	0.065	0.079	0.047	0.05	0.038	0.046	0.056	0.048	0.103	0.021	0.02	2.587	2.802	3.113	2.724	2.662	3.153	2.651
gene10419	pxn.L	45.869	46.594	49.134	50.815	50.657	52.906	54.261	51.581	35.14	33.792	55.125	52.896	54.949	57.425	39.644	38.5	38.118	43.665	42.517	39.704	50.896	51.181	50.644	50.088	46.646	46.464	42.412	42.761	44.2	45.478	41.194	45.823	45.416	46.079	43.987	43.231	46.048	43.12	49.349	45.744	47.818	45.454	44.657	44.974	43.813	43.658	42.27	42.426
gene1042	sp5l.L	0	0.122	0.075	0	0	0.606	88.53	105.675	530.034	584.41	82.988	89.41	0.25	0.085	50.906	54.142	0	0	3.407	3.39	45.329	38.787	31.589	27.752	25.454	33.231	68.009	78.875	78.801	73.106	67.104	74.051	50.083	42.999	37.907	0.674	1.647	1.144	56.384	107.262	53.751	1.718	2.181	1.209	1.343	0.604	0.699	0.626
gene10420	<NA>	0	0	0	0	0	0	0	0	0	0	0	0	0	0	0	0	0	0	0	0	0	0	0	0	0	0	0	0	0	0	0	0	0	0	0	0	0	0	0	0	0	0	0	0	0	0.115	0	0
gene10421	plekhj1.L	10.251	8.29	8.011	7.506	9.826	10.117	10.127	8.276	28.105	25.502	8.168	9.687	8.883	9.45	7.736	7.594	6.709	7.507	7.546	6.149	8.712	10.797	9.688	9.183	9.171	8.675	9.926	6.364	7.095	8.821	6.104	8.031	7.009	8.032	6.501	7.309	7.49	6.282	7.998	8.435	8.609	5.462	6.428	6.53	5.824	7.028	5.201	5.288
gene10422	<NA>	17.021	17.139	16.403	17.352	15.52	13.27	11.828	12.324	9.64	10.133	10.499	10.245	12.678	12.434	10.741	11.088	12.866	11.905	14.058	11.257	13.249	12.004	9.373	11.004	10.722	11.996	10.121	9.77	11.402	10.724	9.382	9.947	11.867	11.621	11.607	13.7	13.768	12.399	10.656	8.87	10.36	20.326	19.211	18.939	17.859	16.898	19.256	20.346
gene10423	cfap43.L	4.075	4.064	0.338	0.5	2.187	2.218	5.914	7.478	3.507	4.771	7.384	7.843	7.702	8.233	3.307	2.855	2.539	3.15	2.488	2.789	4.425	4.613	4.967	5.531	4.658	3.835	3.195	3.31	3.569	3.947	3.44	4.128	3.248	2.947	3.218	2.584	3.361	3.565	5.685	6.624	6.464	3.099	3.733	3.651	3.495	3.814	4.105	3.696
gene10424	dctd.L	47.617	48.677	54.3	65.917	54.65	54.297	45.912	47.898	26.387	28.409	46.591	51.626	47.245	51.41	42.592	39.949	38.478	45.18	43.181	35.935	43.564	47.723	48.575	52.549	52.219	50.703	49.621	57.558	57.761	56.947	65.67	58.748	52.916	47.956	56.299	49.95	50.519	59.512	43.37	54.876	47.33	46.761	50.971	37.263	46.098	47.039	47.002	40.994
gene10425	<NA>	0.118	0.123	0.075	0	0.206	0.203	0	0.089	0	0	0	0.09	0	0.086	0	0	0.057	0.108	0	0	0	0	0	0	0	0	0	0	0	0	0	0	0.087	0	0	0	0	0	0	0	0.114	0	0	0	0	0	0	0
gene10426	cacna1g.L	0.361	0.352	0.288	0.432	0.336	0.304	0.4	0.255	0.323	0.321	0.317	0.28	0.376	0.234	0.444	0.387	0.407	0.227	0.427	0.262	0.253	0.425	0.27	0.364	0.182	0.359	0.093	0.049	0.153	0.098	0.112	0.108	0.154	0.101	0.174	0.092	0.113	0.157	0.172	0.159	0.341	0.249	0.174	0.151	0.138	0.118	0.137	0.143
gene10427	cidec.L	16.51	14.799	16.801	19.48	16.53	14.061	18.118	17.196	8.866	9.419	16.71	14.692	18.907	18.199	17.186	15.559	15.629	17.709	18.106	15.896	13.62	14.482	14.466	12.411	12.933	12.919	12.487	13.345	13.902	15.609	13.14	14.492	14.952	16.132	14.242	17.917	17.055	14.456	18.981	14.905	16.794	17.674	20.289	21.781	18.682	19.103	16.813	20.585
gene10428	<NA>	0.105	0.44	0.269	0.354	2.203	1.452	1.311	0.954	0.471	0.234	2.498	1.759	1.643	3.064	1.456	2.733	2.462	2.02	2.343	2.654	3.876	2.116	3.754	3.53	3.365	5.083	3.262	1.6	2.512	2.261	1.138	2.682	2.494	2.64	1.711	3.933	3.143	2.37	2.46	2.291	0.813	0.726	1.632	1.777	2.21	0.93	1.256	0.749
gene10429	shisa1.1.L	181.344	181.869	247.995	200.537	224.641	189.26	218.249	194.057	222.895	223.396	213.641	189.571	239.253	192.307	192.426	210.402	204.578	207.311	231.225	203.186	222.632	200.158	201.634	208.563	189.954	192.168	244.419	262.454	250.603	238.085	243.498	259.839	262.004	270.996	242.406	293.629	319.598	262.081	218.616	184.683	218.237	242.758	239.82	241.466	230.805	231.506	236.314	259.868
gene1043	ptges.L	2.116	1.937	1.833	1.753	1.703	1.122	1.126	0.787	0.583	0.362	0.875	0.841	0.693	0.663	1.62	1.449	1.871	1.1	2.214	1.882	1.655	1.666	2.193	1.541	1.994	1.281	1.702	1.089	1.605	1.298	1.006	1.756	1.012	1.02	0.882	1.637	2.001	1.856	0.761	0.773	0.88	1.515	2.271	1.77	1.553	1.294	1.997	1.216
gene10430	clic4.L	1.442	1.74	8.474	7.733	38.655	45.039	9.54	11.366	4.032	5.712	8.835	8.074	10.612	8.98	15.011	15.872	17.204	18.891	15.038	15.496	13.032	19.265	18.115	13.061	17.518	15.385	27.393	25.612	18.702	24.113	22.267	21.531	25.811	27.745	20.747	25.309	23.34	23.863	12.717	15.147	6.086	16.847	14.244	15.206	19.602	18.24	16.428	20.187
gene10431	grp.S	0	0	0	0	0.322	0	0	0.139	0	0	0	0	0	0	0	0.114	0.269	0	0.228	0.273	0	0	0	0	0	0	0	0.42	0.293	0.141	0	0.414	0.136	0.867	0.166	0.397	0	0.138	0	0	0	0.318	0.572	0.864	1.056	0.543	0	0.164
gene10432	ap1g1.L	42	42.684	47.192	43.38	31.301	27.615	45.263	43.495	34.637	34.789	48.293	44.704	47.917	48.371	45.022	45.889	47.448	48.092	47.928	42.268	38.188	36.947	37.859	36.903	36.014	37.152	38.722	40.741	41.066	43.723	37.459	41.96	44.226	39.987	38.035	40.962	49.115	41.452	42.483	36.927	43.553	43.456	41.446	42.957	42.758	41.412	40.061	39.056
gene10433	<NA>	0	0	0	0	0	0	0	0	0.148	0	0.105	0	0	0	0.092	0	0.065	0	0	0	0.349	0	0.394	0	0	0	0.128	0.504	0.422	0	0	0	0	0	0	0	0	0	0	0	0	0	0	0	0	0	0	0
gene10434	rbm17.S	34.035	33.285	29.424	30.531	24.405	26.303	24.282	29.057	20.299	21.195	27.469	31.135	28.189	33.456	25.715	26.861	30.45	30.805	28.472	35.136	22.191	21.718	23.749	25.033	25.753	23.826	31.524	30.251	35.344	31.6	30.086	35.031	29.878	31.627	34.544	31.777	27.849	32.236	25.188	35.187	29.723	27.934	30.189	27.758	28.383	28.213	29.537	29.385
gene10435	<NA>	0.258	0.199	0.373	0.452	0.703	0.541	0.434	0.406	0.802	0.449	0.461	0.459	0.413	0.342	0.325	0.138	0.36	0.246	0.36	0.266	0.491	0.573	0.621	0.574	0.522	0.641	0.217	0.324	0.214	0.258	0.19	0.386	0.216	0.263	0.364	0.145	0.197	0.151	0.393	0.443	0.324	0.309	0.208	0.21	0.278	0.346	0.21	0.438
gene10436	<NA>	0	0	0	0	0	0	0	0	0	0	0	0	0	0	0	0.078	0	0	0	0	0	0	0	0	0	0	0	0	0	0	0	0	0	0	0	0	0	0	0	0	0	0	0	0	0	0	0	0
gene10437	edar.L	0	0	0	0	0	0	0	0.047	0	0	0	0.048	0	0	0.087	0	0	0	0	0.093	0.055	0	0.062	0.123	0	0.28	0.061	0.048	0.1	0.288	0.097	0.047	0.324	0.098	0.565	0	0.055	0	0	0	0	0	0	0	0	0.046	0	0
gene10438	dennd2c.S	0.044	0.17	0.266	0.649	0.207	0.051	0.185	0.65	2.587	2.704	0.281	0.721	0.61	0.604	1.681	0.641	0.375	0.515	0.916	0.22	0.286	0.379	0.176	0.819	0.336	0.557	0.689	1.397	0.755	0.864	1.053	1.022	0.988	1.556	0.509	1.321	1.041	0.445	0.115	0.059	0.515	0.358	0.322	0.361	0.255	0.415	0.227	0.369
gene10439	cldn4.L	34.586	34.061	53.813	56.845	29.899	28.821	71.713	82.642	434.634	440.556	73.825	72.45	33.842	40.874	43.769	44.959	14.676	21.44	39.086	46.56	49.102	52.194	55.984	90.893	92.627	92.341	70.016	79.022	73.236	117.609	110.119	93.209	133.378	129.945	119.177	53.78	54.331	40.881	65.429	73.272	133.67	75.328	91.619	87.856	88.032	77.164	76.941	82.103
gene1044	fzd8.S	0.141	0.089	0.362	0.762	1.085	0.878	3.524	6.411	78.564	78.917	7.875	5.2	0.241	0.165	5.241	5.281	0.551	0.026	7.66	10.067	3.026	3.516	3.755	2.957	3.052	3.693	3.671	3.784	3.24	4.252	4.239	3.009	4.9	4.212	2.299	0.732	0.745	0.807	4.736	3.301	9.064	5.119	8.287	7.215	6.263	3.374	4.001	2.264
gene10440	znf577.L	83.093	80.039	125.889	111.583	58.184	67.352	66.032	55.14	23.768	24.789	56.729	53.637	64.39	62.778	53.782	56.612	53.57	55.487	61.568	47.555	37.426	32.586	32.077	38.532	29.079	35.554	52.13	52.091	51.57	55.548	52.392	58.699	57.125	63.088	55.85	66	74.249	65.634	58.1	44.081	55.116	62.777	56.295	63.412	56.558	59.837	59.224	65.085
gene10441	kpna7.S	196.627	200.143	183.808	192.224	77.041	75.468	162.927	164.4	54.71	50.993	164.391	172.529	154.688	178.361	122.424	123.998	131.454	131.727	164.574	167.463	140.231	138.898	160.295	127.292	133.252	138.708	143.18	142.454	136.382	153.536	143.988	134.583	139.83	137.144	140.639	173.385	178.578	190.447	163.473	177.465	157.516	152.77	158.662	143.357	141.103	148.842	145.105	139.526
gene10442	rrad.L	0.144	0.226	0.184	0	0	0	0.1	0	0	0	0	0	0.102	0	0	0	0.07	0.132	0.535	0.214	0	0	0	0	0	0	0.14	0	0.115	0	0	0.108	0.107	0	0	0	0	0.433	0	0.285	0	0	0.223	0.135	0.138	0	0	0.128
gene10443	cdc25b.L	0	0	0.192	0.202	0.209	0.104	40.356	40.968	115.444	120.638	31.107	32.248	0.043	0.087	18.351	18.042	0.059	0	14.368	15.761	21.164	16.958	17.666	11.016	11.237	11.222	40.822	39.759	36.014	20.863	17.533	23.755	21.828	23.012	16.487	1.036	1.529	1.172	21.571	36.764	22.372	12.731	19.827	14.472	14.499	8.445	8.75	3.471
gene10444	uggt2.S	0.603	0.507	0.429	0.508	0.117	0.347	0.464	0.38	0.037	0.112	0.424	0.305	0.618	0.658	0.232	0.29	0.098	0.352	0.104	0.174	0.646	0.398	0.697	0.496	0.536	0.689	0.357	0.204	0.267	0.257	0.233	0.276	0.471	0.184	0.272	0.409	0.265	0.377	0.326	0.265	0.453	0.144	0.026	0.094	0.128	0.025	0.343	0.119
gene10445	cpne7.S	0.226	0.193	0.211	0	0.287	0.142	0.313	0.28	1.288	1.555	0.13	0.062	0.146	0.209	0.114	0.153	0.2	0.188	0.254	0.091	0.108	0	0.204	0.122	0.192	0.074	0.717	1.188	0.981	1.325	0.572	1.109	1.096	0.935	1.04	0.946	0.578	1.142	0.04	0.041	0.04	0.035	0.287	0.193	0.314	0.303	0.07	0.366
gene10446	<NA>	0	0.069	0	0	0	0	0.092	0	0.447	0.888	0.053	0.202	0.047	0	0	0	0.032	0.061	0	0	0	0	0	0.066	0.089	0.178	0.129	0.303	0.106	0	0	0.199	0.049	0.052	0.06	0	0	0	0.194	0	0.128	0.115	0	0	0	0	0	0.059
gene10447	bcl9.S	75.247	71.156	91.256	74.852	87.402	69.431	61.313	59.038	74.871	75.386	64.527	61.7	71.599	64.638	80.036	83.457	95.81	83.865	88.368	98.95	73.197	64.001	68.908	62.945	62.057	67.045	59.197	52.935	53.076	54.097	52.207	58.413	57.134	60.788	52.582	68.992	72.916	57.291	76.702	55.631	69.601	100.197	100.431	107.816	107.975	103.626	104.426	100.131
gene10448	slc9a3r1.S	181.577	179.845	207.568	203.368	211.285	174.285	156.205	146.838	78.565	77.764	142.271	146.596	146.147	153.905	157.396	166.998	206.468	177.037	231.936	298.258	173.298	179.273	164.911	157.955	166.759	183.342	192.297	206.037	205.043	199.56	207.144	213.008	203.115	223.977	221.657	280.381	283.824	273.028	183.78	161.083	164.029	249.688	272.778	263.218	280.668	276.437	272.821	272.106
gene10449	satpa.L	0.756	1.42	2.515	2.035	0.527	0	0.628	0.914	0.338	0.673	1.196	0.919	0.215	0	1.881	1.495	1.473	0.967	2.243	3.811	0	0.553	0	0.596	1.611	1.622	12.589	19.994	19.238	14.144	16.113	16.989	13.429	17.769	17.748	16.292	16.197	22.46	1.177	1.794	0.292	1.824	0.703	1.701	2.885	0.223	0.515	2.688
gene1045	znf319.L	22.712	22.594	23.402	21.04	28.648	24.073	20.802	17.985	17.56	19.454	17.565	15.91	19.535	18.626	11.31	12.496	11.824	11.483	13.854	8.776	22.444	17.745	20.221	21.052	16.562	18.371	13.587	13.294	12.006	12.342	13.405	12.306	14.818	15.216	13.632	14.668	17.753	13.871	16.96	14.995	16.302	12.607	12.987	10.975	12.121	12.044	12.466	13.304
gene10450	znf830.S	40.718	48.199	41.234	45.832	46.557	49.27	30.323	31.166	20.063	19.195	31.665	33.484	30.229	31.779	32.808	29.835	29.225	33.258	45.59	45.478	34.511	44.845	48.607	42.945	48.929	42.308	40.209	36.174	35.492	36.911	38.839	30.907	31.737	28.524	31.046	42.62	43.214	45.825	28.872	37.333	27.064	47.285	45.241	36.662	44.514	45.261	46.869	42.437
gene10451	<NA>	0.115	0.072	0.206	0.155	3.129	3.41	4.457	4.552	8.904	7.674	3.165	4.157	4.602	4.585	2.512	2.531	1.434	5.568	4.521	4.058	4.113	5.38	5.604	3.72	5.023	6.21	0.267	0.28	0.256	0.176	0.32	0.482	0.443	0.396	0.498	0.364	0.121	0.276	3.269	3.23	3.463	0.436	0.285	0.129	0.088	0.203	0.118	0.164
gene10452	c1galt1.S	41.403	40.315	47.442	41.332	57.01	53.122	36.988	37.814	19.76	21.073	39.029	35.841	41.698	37.734	30.036	29.495	28.884	30.052	31.703	30.173	45.264	39.81	35.562	40.886	37.966	36.543	16.534	21.823	19.487	20.046	17.704	18.925	19.176	19.382	20.911	23.359	23.57	19.832	39.333	33.136	37.077	23.935	24.925	28.074	26.003	25.701	23.418	26.049
gene10453	znrf1.L	68.129	69.667	57.459	60.693	62.032	64.453	50.49	50.651	7.416	6.512	51.493	49.119	60.974	58.983	55.973	57.251	61.285	60.4	62.172	62.359	69.184	71.615	66.19	65.467	62.337	63.4	55.35	55.79	53.984	55.188	50.589	49.899	63.942	60.371	57.406	63.011	73.526	57.103	55.588	50.959	58.097	60.966	60.478	64.112	65.72	64.649	60.846	64.085
gene10454	<NA>	0	0	0	0	0	0	0	0	0	0	0	0	0	0	0	0	0	0	0	0	0	0	0	0	0	0	0	0	0	0	0	0	0	0	0	0	0	0	0	0	0	0	0	0	0	0	0	0
gene10455	rbis.L	0.226	0.157	0.048	0	0.395	1.691	0.418	0.171	0	0	0.537	0.172	0.535	0.274	0.209	0.047	0.184	0.034	0.187	0	0.529	1.448	0.523	0.372	0.352	0.607	0.219	0.631	0.3	0.289	0.874	0.735	0.726	1.182	0.681	1.138	0.795	0.623	0.22	0.224	0.291	0.065	0.058	0.071	0	0	0	0
gene10456	nktr.L	0.066	0.055	0.067	0.089	0.092	0.045	0.018	0	0.029	0.059	0.021	0.02	0.075	0.019	0.018	0	0.026	0.012	0.016	0	0	0.048	0.078	0.026	0	0.071	0.051	0.08	0.021	0.04	0.183	0.059	0.136	0.062	0.119	0.057	0.046	0.02	0.026	0.026	0.025	0.113	0.082	0.099	0.025	0.078	0.045	0.023
gene10457	ruvbl2.L	149.285	150.661	118.837	131.008	98.384	107.937	81.883	73.297	41.184	41.882	75.612	81.402	79.85	87.003	86.77	88.481	102.907	89.678	120.483	157.246	77.637	71.523	86.463	73.988	78.696	71.237	62.542	60.885	53.389	56.347	51.192	46.698	65.456	66.193	66.224	97.673	99.075	100.311	86.072	69.734	66.826	112.655	122.297	114.782	125.423	128.327	124.008	141.194
gene10458	donson.L	143.125	142.398	173.316	163.103	167.025	162.678	141.816	123.908	102.743	113.828	142.891	126.631	153.208	135.578	151.149	152.511	153.513	159.46	174.204	149.791	137.159	130.218	129.265	127.733	119.066	126.079	137.745	142.088	134.761	140.839	135.812	147.244	150.541	157.485	144.484	154.25	165.313	147.47	141.271	112.498	156.232	202.421	194.009	191.92	186.691	193.313	189.582	197.691
gene10459	supv3l1.S	40.436	41.23	31.007	34.305	32.687	27.288	22.375	19.856	9.608	9.053	20.135	21.096	17.324	20.099	25.294	24.37	27.971	24.321	33.65	34.432	26.51	24.973	22.631	24.005	24.961	23.832	16.268	15.324	16.569	16.32	14.071	16.166	15.477	14.978	14.902	20.493	19.54	20.953	16.354	18.092	20.321	30.049	26.329	28.566	29.356	26.661	29.903	29.611
gene1046	lrch1.S	9.636	9.636	11.13	9.238	10.775	11.347	8.042	8.922	3.031	2.432	8.174	7.815	7.672	7.434	6.489	5.934	6.482	6.296	6.978	7.892	10.166	10.119	9.038	9.725	8.671	8.902	5.89	6.051	6.18	7.709	6.754	6.694	6.913	8.547	7.597	7.751	8.681	7.114	7.564	6.486	7.086	8.58	8.821	8.044	9.206	8.73	7.775	7.818
gene10460	ankrd1.L	0.027	0	0	0	0.093	0	0	0	0	0	0	0	0	0	0	0	0	0	0	0	0	0	0.053	0.053	0	0	0	0	0	0	0	0	0	0	0	0	0	0	0	0	0	0	0	0	0	0	0.091	0
gene10461	<NA>	3.178	2.618	3.067	3.377	1.361	3.075	3.086	2.948	2.62	1.612	3.174	2.54	3.639	3.325	3.391	2.619	3.584	3.005	3.86	8.431	3.323	4.483	3.755	4.618	4.38	6.18	1.943	3.22	1.241	1.197	2.669	1.587	1.733	2.097	2.316	3.524	2.35	1.673	4.45	3.528	2.367	5.476	7.085	5.541	8.405	6.895	5.51	5.452
gene10462	mapkapk2.S	94.277	92.252	92.527	96.998	88.636	115.829	81.826	80.087	40.203	39.141	82.839	78.829	94.827	86.773	79.742	74.781	73.113	84.539	91.824	76.068	83.711	78.597	84.457	74.886	77.402	74.181	82.423	78.553	77.952	75.108	69.862	73.427	76.668	82.548	80.215	82.34	89.258	88.381	73.845	75.536	74.214	76.48	75.728	72.801	74.229	69.103	73.539	77.795
gene10463	cnnm4.S	12.759	15.049	15.194	13.9	23.023	13.221	14.596	13.872	9.737	9.597	15.396	11.874	12.087	13.896	13.765	12.581	13.795	11.757	12.537	18.261	8.469	8.626	7.012	8.945	7.808	9.824	12.211	13.733	10.792	11.877	11.505	11.215	14.358	15.256	11.987	14.623	14.701	13.224	19.813	11.159	16.156	17.031	20.06	19.984	22.66	22.531	20.485	22.491
gene10464	vps4b.L	142.433	140.806	127.676	152.006	124.2	143.554	136.247	158.971	39.541	42.395	150.032	158.121	157.037	168.705	134.185	135.951	131.111	150.561	138.404	109.388	148.063	157.272	149.104	141.719	170.486	139.456	152.693	158.326	165.751	167.439	167.72	166.208	162.494	152.931	170.847	148.503	143.448	163.659	141.964	155.422	138.173	120.247	124.276	119.033	114.718	126.627	123.902	121.607
gene10465	XB5882685.L [provisional:cdca7]	428.912	427.125	471.044	449.618	435.57	298.798	438.471	380.064	48.956	44.503	412.446	372.104	535.358	463.944	410.619	406.96	551.817	488.898	433.643	537.657	414.439	383.901	383.125	371.026	366.472	400.981	414.041	402.022	414.501	413.042	437.405	404.751	469.21	512.147	473.674	493.13	533.722	476.065	520.758	457.08	473.576	528.073	543.126	548.354	543.761	518.616	526.657	540.751
gene10466	elfn2.S	0.093	0.18	2.398	2.415	0.973	1.145	0.883	0.522	0.03	0.089	0.967	0.484	0.849	0.715	0.184	0.197	0.168	0.631	0.476	0.059	0.419	0.437	0.369	0.105	0.301	0.19	0.257	0.566	0.613	0.53	0.39	0.398	0.964	0.958	0.456	0.516	1.027	0.818	0.233	0.526	0.359	3.161	1.874	2.741	2.08	3.033	2.197	1.938
gene10467	tubb2b.S	0	0	3.36	2.41	0	0	0	0.09	0.401	0.133	0	0.091	0	0	0	0.074	0	0.109	0.443	0	0.419	0.545	0.118	0	0	0	0.231	0.181	0	0.092	0	0.089	0	0.094	0	0	0	0	0.116	0	0.115	0.617	0.092	0.224	0.456	0	0	0.212
gene10468	chodl.S	0.075	0.235	0	0	0	0.517	0	0	0	0	0	0	0.106	0.109	0.207	0.185	0.073	0.411	0.278	0.111	0	0	0	0	0	0	0	0	0	0	0	0	0	0	0	0	0	0	0	0	0	0	0	0	0	0	0	0
gene10469	slc32a1.L	0	0	0	0	0	0	0	0	0	0	0	0	0	0	0	0	0	0	0	0	0	0	0	0.224	0	0	0	0	0	0	0	0.17	0	0	0	0	0	0	0	0	0	0	0	0	0	0	0	0
gene1047	tmem86a.L	5.948	6.005	8.024	5.439	6.765	2.897	5.189	4.395	2.315	2.732	4.09	3.731	5.963	5.455	7.687	9.111	8.502	8.387	7.992	9.585	6.347	5.08	6.915	5.355	8.351	7.86	9.64	8.746	9.563	9.617	8.487	10.461	9.571	10.131	10.975	11.704	14.078	11.156	5.663	4.347	5.24	9.247	15.029	10.547	12.831	11.612	11.567	12.76
gene10470	capn8.3.L	2.747	2.163	7.276	8.596	4.538	4.486	6.469	6.771	2.157	1.501	6.859	6.295	7.18	7.362	9.594	7.923	9.436	10.918	13.882	11.789	6.928	8.102	7.732	5.893	7.124	6.031	5.226	6.373	6.975	8.426	7.667	6.209	7.063	8.08	6.963	7.063	11.171	7.737	7.786	8.006	8.092	12.457	10.904	9.85	10.484	10.714	9.772	12.254
gene10471	<NA>	0	0	0.464	0	0	0	0	0	0	0	0	0	0	0	0	0.149	0	0	0	0	0.636	0.442	0.479	1.192	0.644	0.432	1.17	0.551	0.577	0.464	0.467	0.272	1.074	0.474	0.655	0.347	0.425	0.272	0	0	0	0.208	0.749	0.227	0.115	0.801	0.412	0.537
gene10472	lmnb3.S	43.697	43.354	50.216	47.35	40.937	38.419	41.297	41.702	32.594	31.21	43.109	40.706	46.789	44.276	36.18	35.611	39.552	37.476	42.443	46.933	28.753	29.484	29.117	26.277	27.416	29.29	31.427	33.938	32.958	32.893	30.676	32.534	32.487	36.965	36.455	36.419	41.426	37.747	40.152	33.874	39.623	43.451	43.343	43.266	44.87	43.651	42.638	42.795
gene10473	il1rap.S	0.114	0.179	0.244	0.128	0.932	0.592	0.29	0.49	0.128	0.085	0.302	0.145	0.244	0.305	0.132	0	0.074	0.157	0.094	0.057	0.167	0.07	0.113	0.075	0.102	0.034	0.148	0	0.182	0.205	0.059	0	0.226	0.329	0.138	0.137	0.067	0.029	0.074	0.189	0.11	0	0.207	0.143	0.073	0.14	0.033	0.068
gene10474	aanat.S	0	0	0	0	0	0	0	0	0	0	0	0	0	0	0	0	0	0	0	0.204	0	0	0	0	0	0	0	0	0	0	0	0	0	0	0	0	0	0	0	0	0	0	0	0	0	0	0	0
gene10475	atad1.L	45.48	47.469	50.275	50.81	53.487	44.164	51.411	48.278	26.322	25.848	47.751	49.984	58.116	48.71	43.258	44.39	48.806	44.204	42.862	53.451	50.762	58.312	56.694	53.067	53.845	55.092	47.033	50.023	46.661	47.476	43.693	42.525	48.929	50.375	45.756	49.13	50.099	51.023	51.083	46.153	45.314	66.314	65.469	66.086	69.072	63.947	66.219	56.654
gene10476	slc6a17.S	7.194	5.966	5.569	7.159	5.494	6.158	2.337	2.159	0.654	0.433	2.183	2.59	2.696	2.481	2.559	3.011	2.737	4.169	4.417	4.935	4.64	4.155	4.793	4.9	4.952	4.849	2.547	2.666	1.782	1.992	2.182	2.238	1.899	2.138	1.848	3.033	3.907	3.557	1.644	2.023	2.257	2.379	1.963	1.888	2.293	2.391	2.214	1.704
gene10477	trim36.L	97.67	98.86	78.214	74.17	86.683	96.011	69.837	66.001	15.106	16.493	67.714	63.852	79.46	60.231	52.172	48.262	58.342	50.908	75.087	81.294	82.645	79.335	78.465	81.555	76.524	85.474	70.682	70.407	75.673	72.125	62.033	69.463	55.9	63.296	61.084	77.237	91.954	82.928	78.228	67.347	66.428	79.112	93.527	88.874	100.053	84.671	82.631	89.81
gene10478	ckap5.S	176.796	178.07	219.97	199.095	196.763	184.455	136.075	124.058	37.663	37.506	131.797	124.927	150.069	141.399	141.477	148.394	171.694	145.488	205.616	228.484	138.704	128.105	128.989	119.491	117.354	122.241	121.309	123.371	119.7	108.24	96.206	111.211	96.051	111.438	95.823	168.708	174.974	149.992	149.927	132.211	139.206	218.588	213.68	222.981	225.358	217.214	214.84	213.166
gene10479	<NA>	0.634	0.509	0.811	1.97	0.17	0.168	1.417	0.958	1.528	1.519	0.617	1.111	1.038	0.851	0.405	0.482	0.428	0.535	0.181	0.795	0.599	1.07	1.256	0.385	0.52	0.785	1.322	1.631	0.621	0.823	0.753	0.95	1.516	1.376	1.497	1.401	2.056	1.025	1.139	0.868	0.659	0.925	0.756	0.823	1.117	0.359	1.33	0.867
gene1048	fbxl8.L	0.344	0.406	0.172	0.503	0.156	0.309	0.621	0.587	0.234	0.233	0.284	0.568	0.488	0.827	0.579	0.333	0.175	0.301	0.425	0.377	0.157	0.246	0.326	0.383	0.199	0.428	0.116	0.182	0.238	0.138	0.092	0.246	0.243	0.187	0.297	0.215	0.131	0.292	0.437	0.503	0.548	0.49	0.463	0.477	0.228	0.242	0.586	0.346
gene10480	lpin1.L	34.317	34.24	40.528	33.261	33.204	32.246	32.437	33.194	9.468	10.655	34.317	31.857	37.073	35.242	35.913	39.377	39.908	34.872	39.082	39.61	33.141	32.945	34.541	34.362	29.964	33.07	31.515	31.331	31.509	33.743	30.435	34.254	35.189	37.225	30.401	39.797	39.594	35.122	34.564	29.438	36.164	35.781	36.675	35.647	38.411	37.021	39.576	39.177
gene10481	ubxn4.S	55.386	53.321	40.413	38.15	41.445	38.673	57.397	59.053	38.309	41.908	53.409	58.538	61.232	64.091	59.174	51.798	64.618	57.778	57.843	68.152	43.856	45.073	41.654	43.632	43.985	41.513	49.199	52.702	50.98	51.735	47.755	48.079	52.426	52.31	57.814	53.353	56.358	52.258	49.916	55.737	53.034	63.05	58.156	58.858	57.512	62.613	56.215	56.855
gene10482	thbs3.L	0	0	0	0	0	0	0.044	0.048	0.143	0	0	0	0	0	0	0	0	0	0.04	0	0	0.117	0	0	0	0	0	0.097	0	0	0.05	0	0	0.151	0	0	0.056	0	0	0	0.062	0	0.05	0	0	0	0	0
gene10483	lipg.S	40.938	41.561	48.377	46.869	38.526	39.525	37.192	26.996	6.695	5.971	33.699	28.33	32.537	33.117	30.156	26.687	30.102	28.587	41.866	37.645	44.857	43.898	42.872	39.377	39.66	39.248	28.375	26.099	29.4	28.434	23.453	27.651	24.342	24.452	23.685	35.92	40.27	38.813	28.579	24.888	28.928	26.698	26.567	26.481	22.947	24.785	25.588	24.664
gene10484	depdc4.L	69.623	68	84.584	101.463	89.642	120.852	77.649	79.327	12.192	11.377	80.6	85.295	82.456	85.442	60.69	64.781	57.16	62.597	58.623	45.688	74.839	78.719	86.442	86.321	84.436	78.808	63.306	65.086	64.261	62.633	64.904	65.806	58.48	64.36	60.758	61.373	58.586	65.792	71.846	80.211	73.463	49.828	51.304	47.906	50.224	50.667	50.188	51.917
gene10485	<NA>	9.457	9.858	10.748	9.533	15.264	16.637	8.126	8.724	8.052	6.868	10.631	8.216	9.021	9.073	8.874	9.076	9.557	8.729	10.054	8.633	9.91	9.841	9.8	8.535	8.709	8.39	6.544	6.892	6.439	6.096	5.764	6.32	7.522	7.258	6.784	8.646	9.095	7.989	7.691	6.107	7.789	9.909	10.249	9.437	10.88	9.36	9.922	9.727
gene10486	smarcd3.S	85.052	79.804	110.309	92.252	85.206	80.348	75.561	74.976	76.974	74.236	79.448	72.749	93.438	83.211	103.051	106.25	115.211	116.011	107.448	114.599	96.388	86.592	86.617	87.949	81.544	87.184	82.319	87.961	85.104	87.765	84.773	92.124	93.782	96.207	90.957	98.252	107.593	89.235	86.437	72.916	88.852	105.801	102.553	111.098	109.942	109.034	109.148	113.957
gene10487	ugt1a6.S	0	0.051	0	0	0	0	0.068	0	0	0.217	0.077	0.074	0	0	0.068	0.362	0.238	0.357	0.544	0.435	0.086	0.625	0.194	0.482	0.586	0.699	16.556	19.606	22.69	21.504	22.638	22.178	20.396	18.527	19.587	16.917	17.589	21.699	0.095	0	0.566	0	0	0.092	0.093	0	0.083	0
gene10488	<NA>	0	0.291	1.782	2.813	0.972	0	3.085	2.105	2.494	2.479	1.762	0.423	1.186	1.216	1.926	0.689	0.543	0.509	2.411	2.478	0	0.509	0	0.549	0	3.487	1.079	1.271	0.443	1.282	2.582	0.835	0.825	0.437	2.516	4.403	0.489	1.254	1.627	0	2.151	3.361	6.045	3.135	4.785	2.051	0.949	7.431
gene10489	<NA>	0.246	0.128	7.479	9.111	3.434	4.03	3.406	4.555	2.616	4.516	4.573	5.046	5.151	4.386	2.212	2.282	3.177	2.136	2.358	3.558	6.687	6.521	7.922	8.009	6.309	7.37	5.004	4.396	3.914	4.718	5.512	5.531	4.645	5.303	5.889	5.658	7.564	5.447	5.989	6.693	4.869	7.74	8.773	7.73	7.749	8.424	7.549	9.737
gene1049	rtn4rl1.L	0.208	0.031	0.038	0	0	0	0	0.09	0	0.066	0	0.09	0.042	0	0.246	0.257	0.087	0.054	0.037	0.044	0	0	0	0	0	0.053	0	0	0	0	0.046	0.089	0.088	0.14	0.054	0	0.156	0	0	0	0.057	0.051	0	0	0.057	0	0.101	0
gene10490	<NA>	105.169	103.659	117.477	110.316	111.91	105.218	123.569	117.403	62.046	69.034	115.124	110.601	124.218	118.491	108.118	110.676	116.123	115.861	116.044	104.913	113.712	106.286	106.396	101.483	98.072	104.986	97.524	105.185	104.838	110.204	93.938	106.552	108.23	115.37	106.327	103.533	110.341	99.205	111.349	97.306	108.24	117.171	113.513	116.395	114.956	107.308	113.915	110.452
gene10491	<NA>	11.058	10.589	12.982	12.748	11.678	12.591	8.986	8.175	4.767	5.115	10.322	9.195	10.653	10.136	9.258	8.319	8.599	11.277	12.71	7.12	13.221	13.473	10.651	8.204	8.602	9.312	10.675	11.052	10.166	10.84	9.298	8.816	12.216	11.023	10.383	13.994	14.788	11.367	7.571	5.685	8.028	5.886	5.923	6.088	6.002	6.622	6.915	4.931
gene10492	sertad1.L	1.872	2.127	1.118	1.26	1.161	2.008	1.554	1.32	1.21	0.925	1.381	0.569	0.354	0.242	1.15	0.668	0.486	0.912	1.543	1.542	2.406	2.965	2.142	2.543	2.881	2.529	1.047	1.201	1.389	1.276	0.707	1.246	0.493	0.782	1.427	0.837	1.096	0.936	1.862	1.481	0.963	1.792	1.354	1.638	2.064	1.47	1.843	1.775
gene10493	pitpnc1.L	0.142	0.216	0.224	0.147	0.838	0.753	0.544	0.33	0.513	0.777	0.19	0.531	0.372	0.334	0.257	0.391	0.436	0.359	0.405	0.194	0.172	0.459	0.324	0.388	0.233	0.449	0.613	0.448	0.399	0.553	0.708	0.769	0.501	0.975	0.907	0.769	0.844	0.95	0.276	0.281	0.337	0.433	0.508	0.737	0.354	0.579	0.521	0.485
gene10494	cdca5.L	35.339	34.456	35.561	35.398	28.571	35.832	34.285	31.967	46.571	44.809	33.463	33.115	31.85	33.269	28.877	27.533	25.386	27.47	30.258	21.831	30.76	28.447	27.99	27.137	25.904	24.557	29.233	29.681	30.742	29.68	25.992	27.993	29.932	28.194	25.162	26.17	25.99	26.736	28.183	26.968	25.744	23.499	23.665	20.744	19.977	23.501	22.266	21.651
gene10495	<NA>	0.061	0.126	0.077	0.204	0	0	0.168	0.091	0	0.135	0	0	0.086	0.176	0	0	0	0	0.15	0	0.106	0.332	0	0	0.161	0.108	0	0	0.096	0	0.187	0.091	0	0	0	0	0	0	0.236	0.12	0.234	0.104	0	0.454	0	0.089	0	0.215
gene10496	ptpn1.L	32.673	34.455	33.54	28.587	38.896	35.66	29.642	25.587	22.097	23.241	27.237	24.536	30.391	29.644	30.871	32.402	40.307	32.349	36.786	40.214	27.727	24.379	23.483	20.4	21.096	23.805	25.328	22.892	22.047	19.421	21.249	23.344	21.408	23.11	21.128	31.035	28.919	26.468	27.593	29.321	30.826	41.265	40.341	42.264	48.232	40.74	39.914	44.663
gene10497	capsl.L	0.711	0.809	4.63	3.914	3.155	6.237	1.878	1.562	1.446	1.868	1.226	1.472	2.75	1.598	1.608	2.236	2.077	2.597	2.556	2.012	0.68	0.59	1.024	1.019	0.946	1.386	1.501	2.161	2.055	2.378	3.692	3.678	2.583	2.633	1.867	2.971	3.631	3.296	1.132	3.195	1.372	4.899	5.508	4.725	6.412	5.613	5.835	4.596
gene10498	ighcv.L	0	0	0	0	0	0	0	0	0	0	0	0	0	0	0	0	0	0	0	0	0	0	0	0	0	0.502	0	0	0	0	0	0	0	0	0	0	0	0	0	0	0	0	0	0	0	0	0	0
gene10499	prlh.L	0.054	0.112	0	0.181	0	0	0.223	0.162	0.72	0.597	0.085	0.244	0	0	0.074	0.265	0	0.049	0	0	0.188	0.098	0.212	0.846	0.714	0.671	0.519	0	0.341	1.152	0.497	0.402	0.794	0.504	0.387	0	0	0	0.104	0.106	0.207	0	0.083	0	0	0	0	0.095
gene105	tmprss13.L	0	0	0	0	0	0	0.038	0	0	0	0.087	0.209	0	0	0.152	0.136	0	0	0	0	0	0.05	0.109	0.433	0.256	0.098	0	0	0	0.337	0.212	0.041	0.163	0.043	0	0	0.096	0	0.053	0.054	0.159	0.047	0	0	0	0.121	0	0
gene1050	xcr1.L	0	0	0	0	0	0	0	0	0	0	0	0	0	0	0	0	0	0	0	0	0	0	0	0	0	0	0	0	0	0	0	0	0	0	0	0	0	0	0	0	0	0	0	0	0	0	0	0
gene10500	ube2j2.L	114.044	117.102	122.896	123.916	123.867	149.614	100.709	111.496	48.8	47.301	100.2	104.329	102.405	114.099	100.078	100.71	97.855	105.779	121.965	97.566	111.647	126.72	134.011	126.029	125.295	119.019	111.844	105.651	112.452	106.013	113.149	99.569	104.183	99.457	112.951	114.711	103.534	123.143	100.154	98.526	93.209	94.098	90.778	91.888	82.303	92.483	99.066	95.547
gene10501	hk1.L	1.838	1.752	0.273	0	0.093	0	0.295	0.201	8.466	8.475	0.295	0.283	0.076	0.271	2.394	2.602	3.452	2.945	2.866	3.002	0.234	0.243	0.528	0.21	0.39	0.524	0.206	0.283	0.254	0.082	0.123	0.359	0.118	0.209	0	0.498	0.655	0.2	0.363	0.211	0.206	0.23	0.454	0.4	0.407	0.157	0.409	0.047
gene10502	<NA>	0.094	0.164	0.121	0.317	0.11	0.325	0.087	0.095	7.173	7.62	0.398	0.191	0.089	0	0.608	0.389	0.153	0.201	0.427	0.14	0.826	0.402	0.436	0.682	0.46	1.011	0	0.191	0.1	0	0.097	0.094	0.14	0.148	0.057	0.045	0	0	0.122	0.124	0.485	0.487	0.341	0.943	0.36	0.278	0.268	1.229
gene10503	<NA>	0	0	0	0	0	0	0.556	0.66	0	0.039	0.442	0.557	0.471	0.839	0	0	0	0.016	0	0	0	0	0	0	0	0	0	0	0	0	0	0	0	0	0.063	0	0	0	0.374	0.587	0.742	0	0	0	0.033	0	0	0
gene10504	sik3.S	42.427	43.044	54.346	44.182	50.004	52.201	31.365	28.76	9.116	8.439	31.699	29.153	36.112	31.572	29.569	30.284	30.69	30.141	43.486	37.848	42.222	40.066	38.927	36.706	36.947	36.978	25.183	25.654	24.084	22.708	22.454	25.587	22.118	25.939	23.385	35.103	33.943	31.218	34.88	29.261	32.098	38.419	35.349	37.566	38.935	36.926	37.721	37.971
gene10505	dmrta1.L	0	0	0	0	0	0	0	0	0.142	0.282	0	0	0	0	0	0	0	0	0	0	0	0	0	0	0	0	0	0	0	0	0	0	0	0	0.115	0	0	0	0	0	0	0.109	0.197	0	0	0.093	0	0.113
gene10506	tmem254.S	20.279	22.458	22.172	25.634	12.951	13.457	13.967	12.226	4.048	5.506	11.293	9.689	9.592	15.93	10.135	8.474	7.234	9.22	8.71	8.187	11.016	12.353	11.881	11.078	13.313	10.554	22.124	21.708	23.775	17.668	22.205	15.833	11.417	12.383	11.692	13.68	9.865	12.572	14.457	15.064	12.863	17.064	16.231	12.855	15.444	17.101	15.412	13.544
gene10507	fblim1.L	1.671	1.606	11.252	11.986	1.073	1.819	0.852	1.329	6.395	7.531	1.113	0.735	1.123	1.407	2.614	3.152	2.913	2.008	3.751	4.694	5.087	6.348	5.922	6.504	5.68	6.368	0.766	0.936	0.629	1.214	1.426	0.527	1.627	1.723	0.635	0.884	0.309	0.528	1.027	0.87	1.612	3.41	5.724	5.359	5.034	4.985	5.619	6.489
gene10508	lyl1.S	0	0	0	0	0	0	0	0	0	0.126	0	0	0.081	0	0.079	0	0.055	0	0	0	0	0	0	0.112	0	0	0	0	0	0.174	0.088	0	0	0	0	0	0	0	0	0	0	0	0	0	0	0	0.097	0
gene10509	<NA>	2.298	3.65	1.918	1.681	2.439	1.033	3.872	2.264	10.731	11.334	1.106	1.669	0.425	0.436	4.282	2.964	0.681	0.73	0.741	1.481	2.977	2.556	4.156	5.517	3.592	5.716	5.03	5.923	6.992	7.048	6.481	7.035	6.508	4.697	7.398	2.727	1.755	2.848	2.334	3.557	3.856	1.894	1.239	2.061	1.144	1.618	1.021	1.066
gene1051	rpl37a.L	55.221	58.122	51.853	57.132	15.163	16.771	39.825	42.613	45.281	47.66	35.931	38.439	33.487	42.317	50.73	49.071	59.946	58.156	51.25	75.888	32.028	28.374	29.832	30.11	36.873	34.237	48.606	42.482	48.896	44.052	47.083	45.438	50.414	42.984	55.986	45.137	41.628	43.333	54.001	43.297	35.659	46.111	41.469	43.576	44.148	43.966	42.154	37.179
gene10510	pdzd3.L	0.031	0	0	0	0	0	0.043	0	0.07	0.069	0	0	0	0	0.043	0	0	0	0	0	0	0	0.185	0	0	0	0	0	0	0	0	0	0	0	0.056	0	0	0.094	0	0.062	0.06	0.108	0	0	0	0	0	0
gene10511	atl1.S	2.125	2.856	2.304	2.666	3.391	1.614	3.389	3.645	0.161	0.561	3.759	3.774	3.168	3.72	0.896	1.291	1.087	0.461	1.202	1.441	2.462	2.369	2.14	1.633	2.014	2.768	1.046	1.314	0.687	2.099	0.89	0.863	0.8	0.959	1.496	0.828	0.885	1.027	2.734	3.347	2.988	2.172	2.902	2.498	3.299	3.34	1.902	3.33
gene10512	srrm3.L	0.032	0.067	0.204	0	0	0	0.044	0.048	0.143	0	0.05	0	0	0	0	0.039	0	0	0	0.284	0.056	0.058	0	0.063	0.042	0	0	0	0	0	0	0	0.047	0	0.058	0	0	0	0.062	0	0	0.055	0	0	0.122	0	0	0.113
gene10513	tjp2.L	76.352	75.155	49.534	51.304	58.532	73.526	66.253	70.605	64.63	62.76	78.562	77.89	75.043	89.784	78.2	76.121	89.426	92.843	72.077	108.742	69.975	69.4	72.309	70.017	80.311	74.832	79.883	83.845	73.908	78.956	78.277	74.626	77.501	76.379	82.831	79.925	73.151	73.336	61.823	85.157	75.746	81.691	81.446	76.981	84.211	90.464	81.23	78.466
gene10514	zbtb45.L	24.869	24.845	28.968	28.871	26.088	30.185	16.879	15.106	5.438	6.122	16.146	15.76	18.487	18.568	12.627	12.703	14.086	16.454	19.701	15.548	23.035	21.659	22.641	21.12	20.971	21.667	13.431	12.584	12.55	12.356	11.45	13.002	11.681	13.738	11.344	16.503	17.813	18.617	16.332	14.573	13.9	20.253	18.197	19.499	17.239	19.361	18.588	18.569
gene10515	foxd4l1.1.S	0	0	0.08	0	0	0	11.234	16.32	100.32	109.726	9.282	11.001	0	0	3.885	3.396	0	0	1.158	1.389	1.861	2.396	1.979	0.246	0.166	0	3.023	2.847	4.171	0.67	0.482	0.748	0.37	0.098	0.113	0.09	0.329	0.094	6.929	10.991	1.085	0.215	0.677	0.703	0.357	0.552	0.213	0.111
gene10516	prph2l.S	0	0	0	0	0	0	0	0	0	0	0	0	0.065	0	0	0	0	0	0	0	0	0	0	0	0	0	0	0	0	0	0	0	0	0	0	0	0	0	0	0	0	0	0.071	0.086	0.087	0	0	0
gene10517	map9.L	1.705	1.365	0.911	1.449	0.982	1.142	1.993	1.876	4.112	4.53	2.199	1.735	1.832	1.807	0.916	0.839	0.645	1.134	0.716	0.687	0.319	0.756	0.394	0.359	0.573	0.326	0.769	0.554	0.632	0.99	0.869	0.62	0.735	0.675	0.538	0.666	0.494	0.72	0.967	1.113	0.927	0.428	0.872	0.621	0.506	0.366	0.621	0.618
gene10518	pcdh1.S	99.551	102.512	123.915	108.058	106.839	107.245	109.193	101.534	48.389	49.415	109.93	96.85	121.363	111.558	97.287	104.41	109.068	105.942	119.271	106.871	106.317	95.292	90.595	88.096	86.15	93.331	85.792	83.726	81.261	88.915	80.3	87.175	90.653	93.867	78.716	97.472	110.946	94.203	101.481	83.397	99.256	100.564	97.822	107.768	95.917	96.239	98.574	101.792
gene10519	st3gal1.L	0.015	0.048	0.117	0.46	1.326	1.153	0.189	0.23	1.871	1.522	0.144	0.346	0.065	0.066	0.273	0.226	0.193	0.181	0.376	0.361	0.48	0.333	0.602	0.63	0.567	0.815	0.559	0.601	0.484	0.676	0.751	0.706	0.473	0.524	0.467	0.284	0.08	0.137	0.178	0.511	0.235	0.524	0.495	0.627	0.609	0.761	0.363	0.405
gene1052	<NA>	19.132	18.771	18.035	19.103	27.138	25.723	18.8	17.825	10.275	15.321	20.172	21.989	18.009	21.898	14.372	15.61	16.837	19.751	20.5	23.072	24.374	25.524	29.813	22.263	26.753	25.884	18.772	16.965	17.042	17.997	15.17	17.294	17.561	14.791	16.816	19.61	15.12	19.426	19.74	23.461	19.571	26.268	28.17	28.224	23.733	25.54	29.342	26.31
gene10520	lrrc4.L	0	0	0	0	0	0	0	0	0	0	0	0	0	0	0	0	0.011	0.011	0	0.017	0	0	0	0	0	0	0	0	0	0	0	0	0	0	0	0	0	0	0	0	0	0	0	0	0	0	0	0
gene10521	bard1.L	115.893	116.951	122.228	111.949	123.653	152.405	80.694	72.662	35.791	37.467	77.723	73.357	89.231	83.951	40.675	41.865	46.592	48.225	62.471	63.525	104.643	108.756	105.888	99.877	102.277	98.694	84.051	82.617	84.671	81.061	77.289	82.802	72.756	82.616	72.941	101.94	107.966	99.387	77.581	72.501	79.073	97.091	96.284	94.045	95.75	95.71	103.044	92.714
gene10522	adamtsl5.S	0.312	0.326	0.08	0.105	0.218	0.43	0.346	0.094	0.489	0.417	0.197	0.19	0.266	0.318	0.345	0.193	0.213	0.399	0.309	0.416	0.602	0.171	0.309	0.369	0.208	0.335	0.06	0.095	0.099	0.144	0.145	0.281	0.277	0.196	0.507	0.359	0.219	0.047	0.061	0.062	0.12	0.323	0.532	0.41	0.238	0.46	0.372	0.611
gene10523	rabac1.S	12.381	10.666	13.705	11.575	15.765	9.146	15.911	11.876	7.256	9.617	16.938	16.865	17.986	16.583	18.068	14.819	20.485	19.929	20.894	21.998	15.504	19.753	18.88	17.829	20.413	20.204	13.319	16.131	15.785	12.207	13.963	14.574	13.674	10.933	14.019	14.683	17.429	15.039	16.259	16.519	16.12	20.659	17.361	17.689	17.439	18.952	21.432	14.852
gene10524	<NA>	0.082	0	0.052	0.137	0	0	0.056	0.062	0.183	0	0.258	0.062	0.058	0	0	0.05	0.04	0.037	0.101	0.181	0	0	0	0.08	0.054	0.073	0	0.062	0.13	0.063	0.126	0.061	0.423	0.192	0	0	0	0.184	0.159	0.403	0.158	0.07	0	0	0.311	0	0.209	0
gene10525	sh3bgrl2.L	40.304	42.018	35.411	34.39	39.27	37.183	31.361	32.59	29.957	25.465	29.851	35.28	30.207	34.207	33.028	32.163	30.416	35.179	38.132	36.121	39.476	41.756	44.978	45.996	45.737	36.37	37.833	35.595	37.922	33.374	31.492	30.76	26.612	27.132	26.484	37.927	37.053	40.177	32.876	40.418	30.951	41.251	34.899	35.927	39.542	37.471	37.564	37.517
gene10526	gins1.S	92.041	85.831	74.901	85.266	69.124	76.773	14.845	14.353	5.715	3.863	12.763	15.516	13.481	16.795	14.406	12.123	13.435	17.452	30.689	26.96	44.056	50.406	47.35	39.287	51.696	41.644	18.991	19.721	16.898	17.391	17.514	16.989	11.342	11.846	11.807	31.117	29.064	37.708	16.705	21.214	17.153	41.195	40.373	35.248	43.084	35.345	42.648	28.701
gene10527	XB956055.L [provisional:stk35]	79.007	82.049	93.955	85.931	67.741	61.033	75.839	72.207	41.981	42.981	79.139	78.916	82.958	80.542	76.992	78.111	95.984	76.314	84.569	107.933	91.896	89.215	84.465	87.617	86.038	84.628	75.091	76.367	71.869	74.973	75.25	72.745	76.917	74.794	70.21	95.296	101.919	82.621	88.026	82.703	89.504	87.831	97.878	102.447	104.321	103.875	102.211	87.631
gene10528	znf81.L	36.932	35.922	26.158	30.504	27.574	30.006	24.756	21.897	0.893	0.977	21.595	22.438	21.246	28.058	19.376	17.176	17.581	22.615	30.851	21.548	26.529	26.268	32.663	26.773	28.128	26.342	20.644	20.635	19.687	20.391	18.378	22.253	20.629	20.147	18.892	31.437	33.517	32.412	23.24	21.558	21.192	27.661	25.124	22.387	25.83	27.511	26.262	27.121
gene10529	fbxw4.L	14.856	13.871	15.669	14.323	14.115	15.571	14.382	13.766	9.114	12.138	14.947	13.483	16.709	14.701	13.32	14.976	16.253	15.671	16.042	15.329	16.204	15.603	16.343	16.272	14.047	15.779	12.438	14.883	11.877	13.334	11.856	14.239	14.417	15.67	13.439	15.718	16.553	13.203	14.587	11.98	13.858	18.628	15.053	18.752	16.542	15.261	16.995	14.903
gene1053	abca3.L	16.338	17.068	21.202	17.099	15.62	11.765	20.239	18.967	18.037	17.828	18.976	20.312	20.97	21.321	17.208	19.09	20.895	19.779	22.394	22.575	10.937	11.853	10.889	9.624	9.912	10.878	15.52	15.258	14.663	13.713	14.025	15.293	17.649	14.858	14.112	18.416	21.072	17.471	20.412	15.179	19.075	24.51	27.188	28.408	26.582	26.419	26.55	28.201
gene10530	mthfs.S	3.949	5.005	1.263	1.424	0	0	0.586	0.639	0.947	1.255	0	0.643	0.4	0	0.195	0	0	0.129	1.046	0	0.247	0.258	0.279	0.556	1.315	0.252	0.819	0.429	0.224	0	0	0.211	0.209	0.221	0.255	0	0	0	0	1.116	0.817	2.431	3.497	0.793	3.768	2.284	1.202	0.502
gene10531	usp7.S	75.822	75.339	74.415	75.918	77.157	86.389	81.143	76.893	72.405	73.789	81.63	77.046	88.197	87.783	69.029	73.649	75.803	77.08	79.279	80.462	70.949	61.661	60.188	65.236	59.246	62.564	62.402	63.909	60.269	67.766	59.786	66.001	67.827	66.598	64.564	69.233	74.07	67.468	77.529	67.182	85.755	76.049	76.942	79.375	78.065	76.218	81.203	80.694
gene10532	relb.S	2.345	2.404	2.09	2.678	2.191	3.753	2.492	2.594	1.968	2.049	2.583	2.353	3.387	2.132	1.853	2.071	2.448	2.027	2.278	3.352	7.781	6.734	8.875	6.854	7.64	7.711	4.784	4.392	3.463	4.046	3.816	4.015	3.719	2.756	5.294	4.512	5.001	4.524	2.445	3.064	2.344	3.392	3.31	2.905	2.397	2.651	3.924	3.946
gene10533	pebp1.2.S	33.559	33.339	15.349	16.935	18.334	28.652	28.601	32.172	23.524	27.482	29.77	28.318	29.388	32.355	28.199	27.713	22.714	27.006	28.715	24.245	18.981	20.115	21.001	20.644	20.102	17.109	29.579	29.092	33.013	31.006	30.879	27.327	26.67	24.922	27.424	26.143	25.879	28.65	30.348	30.921	27.4	26.246	26.737	25.358	22.548	25.796	25.416	23.407
gene10534	clec11a.L	0	0	0	0	0	0	0.058	0.064	0	0	0	0	0	0	0	0	0	0	0	0	0	0	0	0	0	0	0	0	0	0	0	0	0	0	0	0	0	0	0	0	0	0	0	0	0	0	0	0
gene10535	elovl1.S	56.911	55.428	61.337	66.103	44.71	51.989	65.994	69.382	35.995	38.578	64.735	67.572	75.61	74.6	60.315	55.706	58.59	60.752	66.098	56.696	64.585	59.057	61.38	59.91	61.445	58.742	68.489	63.15	63.907	69.277	63.834	64.501	67.243	58.462	65.43	60.619	70.689	60.398	67.173	61.002	59.46	55.32	52.589	51.106	54.407	53.236	54.577	52.42
gene10536	<NA>	0.027	0	0.035	0	0	0	0.038	0.124	0.061	0	0.086	0	0	0	0.075	0.404	0	0	0	0	0.048	0.1	0	0	0	0	0.053	0.083	0.043	0.084	0	0.082	0.04	0.043	0.098	0.078	0.048	0.082	0.053	0	0.053	0.047	0.084	0	0.156	0	0.046	0
gene10537	<NA>	0	0	0	0	0	0	0	0	0.973	0.56	0	0	0	0	0	0	0.022	0	0	0	0	0.042	0.045	0	0	0.082	0.089	0	0.036	0	0	0	0	0.072	0.041	0	0	0	0.045	0	0.044	0	0	0	0	0	0	0
gene10538	kctd8.L	0	0.056	0	0	0	0.184	0.074	0	0	0	0	0	0.076	0	0	0	0.052	0	0	0	0	0	0	0	0	0	0	0	0	0	0.082	0.16	0	0	0	0	0	0	0.104	0	0	0	0	0	0	0	0	0
gene10539	pja2.L	58.334	56.07	49.406	50.404	50.837	55.432	45.572	46.868	11.071	13.013	43.51	47.272	44.589	45.767	36.512	38.06	38.949	40.283	52.198	54.669	50.108	50.156	51.451	46.349	53.689	54.271	49.652	53.915	49.821	46.245	46.057	47.931	32.861	38.085	36.948	48.224	51.84	53.272	38.07	54.215	41.035	44.705	44.971	43.756	44.912	44.543	46.824	41.67
gene1054	<NA>	36.562	36.603	43.422	33.244	40.634	28.216	27.148	27.168	24.687	25.958	29.636	30.217	32.412	29.843	41.629	44.706	55.911	44.41	44.365	62.801	29.92	33.555	32.03	28.2	28.801	30.692	31.853	31.149	28.476	27.03	25.468	29.776	26.917	28.336	27.693	37.34	36.547	33.528	37.953	28.87	27.789	64.589	66.667	74.539	70.194	69.723	67.325	68.663
gene10540	<NA>	0.797	0.832	0.204	0	1.113	1.1	1.104	0.964	0	0	0.252	1.453	1.132	0.232	0.882	0.394	0.466	0.437	0.592	0.236	0.28	0	0.316	1.887	1.062	0.57	1.235	1.212	3.044	1.468	3.202	2.389	2.833	2.499	3.168	1.833	1.681	0.718	1.242	0.631	1.231	1.099	1.73	0.598	2.739	1.174	2.446	1.134
gene10541	cfap20.L	29.544	27.597	30.607	27.632	26.833	22.509	14.495	11.232	9.837	8.916	11.962	10.801	13.852	12.604	11.709	11.668	14.359	12.108	20.86	20.032	23.574	23.274	23.434	25.245	24.106	21.846	16.525	14.937	13.881	9.717	10.385	12.785	14.452	13.778	9.34	18.856	25.091	18.237	17.997	16.494	16.844	29.858	27.453	30.186	29.98	27.317	28.201	28.279
gene10542	<NA>	0.099	0.078	0.032	0	0	0.257	0	0.075	0	0.055	0	0	0.035	0	0.069	0	0.121	0.159	0.031	0.037	0	0	0	0	0	0.044	0	0	0.079	0	0	0.074	0	0	0.09	0.036	0.087	0	0.145	0	0.192	0.043	0.039	0	0	0	0	0
gene10543	rrbp1.L	22.195	23.212	22.414	20.843	25.226	28.05	23.679	21.751	18.055	21.266	24.485	23.069	28.03	24.696	23.905	26.403	22.172	19.781	26.238	26.841	21.159	19.454	18.176	17.384	16.163	15.477	16.106	16.972	14.308	15.356	9.949	13.985	12.916	13.034	13.307	16.042	17.743	14.854	23.759	20.786	20.59	23.214	23.014	26.532	24.456	23.161	25.111	23.551
gene10544	rhbdf1.L	0.68	0.473	0.621	1.307	0.226	0	0.09	0.244	0.072	0.072	0.409	0.442	0.321	0.377	0.537	0.04	0.473	0.325	0.52	0.72	0	0.237	0.321	0.128	0.259	0.289	0.313	0.197	0.103	0.397	0.35	0.339	0.431	0.406	0.292	0.139	0.398	0.243	0.252	0.064	0.375	0.669	1.003	1.335	0.741	0.572	1.434	1.208
gene10545	<NA>	0	0	0	0	0	0	0	0.053	0	0	0	0.053	0	0	0	0	0	0	0	0	0	0	0	0	0	0	0	0	0	0	0	0.105	0	0	0	0	0	0	0	0	0	0	0	0	0	0	0	0
gene10546	macc1.L	24.481	25.771	28.931	33.87	25.976	30.941	15.117	18.32	6.623	7.264	17.305	19.404	16.204	21.337	19.537	20.656	16.11	23.43	26.465	20.13	10.043	8.864	10.932	11.148	11.164	11.165	24.813	23.599	25.635	27.413	23.979	25.005	26.235	22.474	26.452	26.258	29.009	26.935	16.728	16.656	15.959	18.528	18.024	18.943	18.841	18.387	19.719	17.623
gene10547	ipo5.S	86.968	88.158	88.652	93.145	68.936	64.187	95.591	96.984	78.32	78.863	101.186	99.446	97.137	111.341	92.14	91.079	89.419	97.826	99.187	89.174	74.155	74.381	76.452	76.593	71.761	67.771	86.966	90.171	89.86	101.313	89.237	97.415	93.655	94.628	87.889	85.117	93.372	87.852	85.766	87.82	90.121	80.378	80.419	79.57	71.624	80.121	79.658	77.821
gene10548	<NA>	0	0	0	0	0	0.659	0	0	0	0	0	0	0	0	0	0	0	0	0	0	0	0	0	0	0	0	0	0	0	0	0	0	0	0.15	0	0	0	0	0	0	0	0	0	0.179	0	0.141	0	0
gene10549	<NA>	0	0	0	0	0.382	0	0	0	0	0	0	0	0	0	0	0	0.107	0	0	0	0	0	0	0	0.146	0	0	0	0	0	0.169	0	0	0	0	0	0	0	0	0	0	0	0	0	0	0	0.187	0
gene1055	XB5802829.L [provisional]	0.802	0.761	0.28	0.491	0	0	0.606	0.331	0	0	0.346	0.111	0.931	0.424	0.101	0.18	0.213	0.133	0.09	0.216	0	0	0	0	0.097	0	0	0	0	0	0	0	0	0	0	0	0	0	0.426	0.288	0.281	0.251	0	0.273	0	0.322	0.124	0.519
gene10550	sav1.S	3.904	3.434	4.182	3.691	3.519	3.251	4.644	3.777	2.552	4.391	4.266	4.464	5.042	3.957	5.125	4.121	4.594	3.927	5.233	5.593	5.114	5.772	5.083	4.585	5.462	4.863	1.826	2.2	2.268	1.716	1.897	2.465	2.24	2.647	2.733	1.67	1.926	2.139	5.593	4.902	5.334	4.158	3.569	4.154	3.641	4.101	3.364	4.134
gene10551	taf11.S	62.447	62.987	57.828	62.376	64.962	87.97	64.189	62.138	40.961	38.992	68.728	65.176	74.815	72.526	67.909	65.46	65.282	66.685	65.917	63.62	70.985	73.997	70.619	69.143	75.017	75.252	67.89	69.668	72.97	70.081	64.515	65.794	66.972	70.749	72.713	66.245	74.317	69.114	57.051	67.983	69.779	51.528	53.769	49.906	54.796	47.517	50.406	51.707
gene10552	crhr1.2.S	0	0	0	0	0	0	0	0	0	0	0	0	0.053	0	0.052	0	0	0.034	0	0.056	0	0	0	0	0	0	0	0	0	0	0	0	0	0	0	0	0	0	0	0	0	0.129	0	0	0	0	0	0.067
gene10553	lipe.S	22.96	22.702	26.839	23.267	17.376	18.17	14.364	14.617	8.442	8.873	14.93	14.997	17.442	16.072	16.72	16.758	19.167	17.579	21.758	24.273	13.544	11.941	13.193	12.317	12.884	11.392	13.108	12.978	13.178	11.018	11.096	12.71	13.201	12.276	11.344	14.757	16.96	13.759	16.691	14.958	15.747	22.801	21.709	24.033	22.391	23.998	22.546	21.473
gene10554	upp2.S	12.8	12.701	14.386	15.022	21.883	21.483	4.604	4.008	2.073	1.311	4.395	5.308	4.481	4.84	14.262	14.991	14.644	18.426	18.896	15.545	7.086	6.925	7.34	7.723	6.28	10.314	3.017	2.112	1.875	3.293	2.992	2.839	2.93	3.497	3.194	3.811	2.81	2.97	5.41	4.58	4.307	7.619	8.223	7.343	7.955	6.013	9.184	6.514
gene10555	XB5894820.L [provisional]	0.362	0.567	0.637	0.457	0.474	0.624	0.627	0.616	0.405	0.201	1.146	0.757	0.9	0.725	0.626	0.616	0.75	0.745	1.232	0.604	0.397	0.662	0.718	1.161	0.603	0.648	0.526	0.275	0.36	0.278	0.35	0.339	0.067	0.213	0.409	0.195	0.557	0.544	0.353	0.448	0.437	0.312	0.561	0.34	0.173	0.133	0.617	0.161
gene10556	ppfibp1.S	46.475	47.656	43.633	38.281	43.656	33.265	33.806	33.593	27.173	25.145	37.303	35.827	41.474	39.269	46.338	50.048	61.011	48.762	52.905	73.917	35.549	39.059	37.581	35.533	34.236	36.923	45.09	44.216	40.891	36.748	37.512	39.669	39.957	42.113	41.125	50.535	48.26	42.773	41.017	40.059	42.151	89.975	96.739	98.254	99.991	90.938	94.565	93.253
gene10557	pacrgl.L	83.888	74.457	70.153	80.032	79.484	78.181	59.27	51.892	21.678	16.897	56.584	60.364	51.082	63.108	48.097	43.958	41.29	53.808	70.91	61.372	88.587	86.109	91.806	89.236	100.72	82.671	39.439	37.82	39.924	38.665	31.457	32.988	30.477	28.466	28.63	42.392	45.628	54.513	53.578	61.183	53.757	78.924	82.24	69.159	75.423	74.722	77.476	69.691
gene10558	smim22.S	20.305	18.967	11.627	8.113	23.284	23.972	36.314	33.338	18.465	16.499	36.804	29.996	39.469	34.263	14.1	15.473	17.432	14.146	14.099	10.035	8.127	14.402	9.55	8.96	5.433	7.294	11.85	10.57	11.945	12.798	13.318	13.335	12.216	12.641	12.391	12.522	12.538	13.495	34.113	34.841	35.61	18.055	16.238	18.777	16.101	14.47	18.011	15.827
gene10559	znf652.L	27.72	29.784	33.38	27.275	35.004	35.138	23.279	20.382	32.999	32.245	23.621	20.682	26.586	23.284	25.969	28.113	31.196	26.257	29.785	29.735	27.643	26.778	25.447	27.505	24.742	27.294	24.209	24.064	22.107	22.425	21.444	25.977	24.274	24.218	20.677	27.914	28.133	23.613	25.651	21.37	24.674	32.912	32.811	33.574	35.516	34.315	34.737	37.478
gene1056	gjb5.L	0.796	0.831	0.204	0.536	5.275	6.174	0.11	0.12	0	0.177	0.126	0.242	0.056	0.29	0.495	0.492	0.233	0.545	0.443	0.354	0.349	0.145	0.079	0.392	0.424	0.783	1.233	1.392	0.76	0.977	0.492	0.775	0.589	0.561	0.863	0.972	0.349	0.657	0.232	0.157	0.077	0.137	0.123	0.224	0	0.176	0.068	0.071
gene10560	nat14.S	6.742	5.277	9.765	11.66	8.981	7.586	5.313	4.951	0.629	0.521	2.369	3.484	2.79	2.997	2.46	2.662	4.059	3.465	3.646	5.137	1.477	2.396	2.318	2.216	2.993	2.009	5.802	5.551	5.436	6.534	4.339	7.155	5.198	5.136	4.989	6.929	7.482	8.219	4.739	3.982	3.705	7.503	7.909	7.814	8.845	7.031	8.616	6.41
gene10561	sephs3.L	90.877	82.888	89.362	100.024	75.959	66.61	103.906	100.932	67.601	63.741	95.426	96.872	98.631	98.271	90.667	95.035	113.973	104.715	114.578	104.635	76.358	83.189	87.573	78.797	92.021	78.315	83.393	86.12	95.322	80.236	94.21	87.213	107.993	105.59	102.466	111.047	123.797	103.072	110.61	105.25	98.286	103.844	114.834	102.557	103.745	107.402	97.657	96.086
gene10562	nr1i3.L	2.392	2.866	0	0	0	0.458	0	0	4.658	4.335	0	0	0	0	0.061	0.11	0.173	0.04	0.055	0.066	0.078	0	0	0	0.059	0.158	0	0	0.07	0.068	0	0.133	0	0.139	0	0	0	0.066	0	0.088	0	0.076	0	0	0.085	0	0	0
gene10563	dusp10.2.S	0	0	0.143	0.251	0.781	0.129	0.31	0.056	0.334	0.083	0.059	0.567	0	0.109	0.206	0.277	0.036	0.102	0.185	0.055	0.262	0.205	0.296	0.442	0.149	0.4	0.289	0.284	0.237	0.114	0.461	0.056	0.442	0.117	0.135	0.054	0.197	0.056	0.218	0	0.432	0	0.116	0	0.142	0.11	0.191	0
gene10564	<NA>	0.89	0.929	0.829	1.09	0.282	0.558	0.672	0.489	0.724	1.08	1.152	1.352	0.919	0.353	0.336	0.7	0.394	0.296	0.901	1.8	1.277	0.444	1.443	0.638	0.97	0.579	0.313	0.246	0.644	0.124	0.5	0.121	0	1.015	0.292	0.93	0.426	0.364	0.315	0.64	0.781	0.139	0.251	0.304	0.309	0.357	0.828	0.144
gene10565	ttc34.L	1.491	1.251	1.534	1.181	0.816	0.806	1.295	1.767	6.934	6.568	1.988	1.865	1.784	1.829	0.364	0.614	0.655	1.309	1.373	0.867	1.794	2.564	2.606	2.018	1.246	1.673	2.208	2.311	2.836	3.362	2.483	1.577	3.202	1.512	2.006	2.856	3.183	3.86	1.65	1.619	2.031	2.519	1.631	1.754	1.283	1.463	2.491	1.715
gene10566	rap1a.S	88.48	98.872	88.486	85.524	68	97.368	96.052	104.599	52.387	53.745	105.41	107.818	102.144	117.944	79.595	75.082	73.859	87.076	90.642	106.603	68.357	82.676	88.952	77.064	78.111	77.759	83.896	88.399	93.955	83.695	87.12	85.755	80.296	77.423	86.819	92.775	88.523	103.389	97.801	114.192	102.27	76.529	85.869	81.711	76.955	87.339	85.608	82.965
gene10567	rplp2.S	50.799	48.422	38.139	44.487	29.832	23.231	30.67	27.801	22.909	25.367	26.848	29.132	27.215	32.241	28.487	29.797	31.309	33.505	33.805	44.384	27.944	27.946	31.317	25.047	23.471	27.109	26.852	26.594	24.735	22.856	23.819	27.182	24.94	24.573	24.34	37.985	27.083	37.919	33.3	35.113	30.014	29.926	34.345	28.676	29.43	31.863	28.266	32.031
gene10568	angptl4.S	0	0.096	0	0	0	0	0	0	0	0	0	0.07	0	0	0	0	0	0	0.114	0	0	0	0	0	0	0	0	0	0	0	0	0	0	0	0	0	0	0	0	0	0	0	0	0	0	0	0.078	0
gene10569	mcrs1.S	12.419	12.579	9.387	13.579	11.331	14.813	18.638	16.545	24.037	20.514	16.905	18.863	14.722	15.247	14.851	14.639	15.62	17.09	17.232	15.382	27.742	23.174	23.769	23.045	23.656	27.825	12.887	14.258	12.252	13.18	12.788	12.247	10.628	8.54	9.085	9.787	10.767	9.592	15.709	18.447	15.979	21.221	17.054	18.277	17.7	18.824	15.804	14.908
gene1057	ouro1.L	0	0	0	0	0	0	0	0	0.198	0.197	0	0	0	0	0	0	0	0	0	0	0	0	0	0	0	0	0	0	0.071	0	0	0	0	0.069	0	0	0	0	0	0	0	0	0	0	0	0	0	0
gene10570	xpot.S	76.535	79.559	97.983	102.645	82.646	89.682	99.96	102.08	57.13	59.715	98.666	106.884	109.671	109.441	90.343	89.953	88.755	94.129	91.872	86.596	83.657	93.422	93.756	93.311	96.879	87.634	90.796	94.453	93.268	100.93	87.586	95.99	98.484	95.071	95.638	91.195	91.441	93.557	87.664	94.453	94.635	77.972	77.851	73.211	77.566	75.72	80.556	77.98
gene10571	gtf3a.L	76.62	74.977	60.522	66.021	86.3	108.389	54.677	50.702	17.894	20.981	55.452	51.596	48.202	54.495	49.327	43.936	45.144	46.645	56.193	62.728	53.202	53.961	49.01	50.955	46.148	43.505	42.222	37.715	37.724	40.044	42.967	37.275	46.141	41.987	45.919	55.486	60.498	59.485	50.961	50.152	56.988	60.662	60.487	63.445	60.653	65.512	64.174	63.079
gene10572	pkn2.S	86.596	87.273	108.727	99.676	82.869	94.531	90.1	86.412	54.437	53.887	91.031	86.115	99.252	96.388	84.219	90.544	87.873	91.457	95.501	90.602	86.395	82.515	83.468	78.866	76.321	79.246	81.82	85.664	82.544	81.634	72.533	82.302	82.335	82.377	73.677	85.237	95.096	82.958	82.717	71.823	83.809	95.61	89.58	92.946	93.135	91.864	90.545	91.17
gene10573	mars1.S	57.81	57.596	54.948	61.796	42.926	41.969	57.084	55.077	29.772	30.78	54.866	56.635	56.497	58.412	53.161	48.685	52.461	56.218	56.954	58.538	50.733	52.399	55.147	52.94	51.561	53.763	50.048	49.905	53.911	48.514	47.215	45.748	47.125	47.017	44.633	51.09	51.231	50.96	51.543	53.352	51.423	53.253	54.851	58.258	53.067	54.311	51.635	51.222
gene10574	cope.L	95.165	99.601	87.124	94.966	75.799	77.034	62.216	64.606	42.747	34.307	63.749	69.345	60.431	67.444	61.303	60.554	66.671	65.006	82.985	96.792	85.262	86.637	95.12	92.115	114.947	106.227	83.658	76.858	74.846	76.336	82.698	74.834	89.123	86.375	96.695	103.874	99.108	121.628	69.088	71.404	85.409	89.552	92.216	92.187	86.792	94.183	93.027	98.324
gene10575	trim33.L	68.176	62.767	73.494	73.383	66.702	76.644	77.266	75.404	47.014	47.976	78.119	74.539	83.416	81.225	68.5	68.325	74.436	70.276	75.222	75.62	70.21	69.976	66.461	67.737	62.641	68.462	65.43	66.58	64.211	69.675	57.42	70.184	67.985	74.081	67.1	69.618	69.58	69.101	67.236	66.614	69.185	63.919	63.731	66.859	63.704	60.763	64.005	64.581
gene10576	tpk1.L	18.368	17.934	15.353	19.443	10.592	16.596	11.481	13.987	8.618	10.379	11.83	12.262	11.455	14.224	13.619	15.382	12.699	15.495	13.368	14.385	8.829	9.069	13.204	8.326	10.85	10.991	12.621	14.073	13.194	14.085	14.986	14.647	11.184	12.999	12.975	14.366	11.056	14.114	10.381	12.158	13.294	12.381	15.841	13.055	11.873	13.631	18.552	12.907
gene10577	hps5.L	34.253	33.704	53.56	46.785	50.945	47.447	36.311	35.427	14.282	14.16	35.915	33.134	38.962	38.472	40.269	43.684	45.57	44.684	45.219	46.985	42.376	36.942	35.475	36.136	34.435	35.866	32.482	30.807	30.785	31.61	28.061	32.065	31.837	33.646	30.014	35.868	40.97	36.374	34.797	29.807	32.773	38.009	37.703	39.843	36.279	37.716	36.352	37.139
gene10578	immt.L	75.187	76.049	92.4	84.396	83.765	66.908	80.584	75.214	54.743	57.865	82.216	72.274	86.728	83.823	78.639	82.764	102.679	83.217	97.036	106.639	62.832	62.219	58.232	60.07	54.028	56.645	62.771	64.335	55.125	56.156	54.854	55.896	63.2	71.947	59.793	79.031	96.169	75.071	94.456	74.351	85.935	97.391	107.176	108.88	110.027	101.934	102.482	104.116
gene10579	agr2.L	0.608	1.111	0	0	0	0	0.21	0.459	1.02	1.014	0.24	0.923	0.216	1.769	0.21	0.376	0.444	0.139	0	1.578	0.266	0	0	0	0.405	0	0.294	0.462	0.484	0.233	0.235	0.228	0.45	0	0.275	0	1.335	0.456	1.184	1.202	0.587	0	0	1.14	0.29	0.448	0	0
gene1058	aff4.S	44.023	45.134	54.511	47.312	49.991	60.063	52.735	49.223	46.756	48.35	52.18	48.117	57.866	55.905	46.864	46.46	48.653	48.533	47.693	38.804	48.484	45.118	42.176	40.877	39.865	44.06	37.559	36.947	39.755	42.767	35.628	40.312	39.878	42.931	37.791	39.517	43.734	38.4	44.696	38.028	44.815	49.928	43.265	47.587	44.78	43.421	46.969	46.295
gene10580	<NA>	38.442	39.877	23.78	24.924	56.923	62.766	29.246	30.785	33.353	35.359	32.002	29.66	37.079	32.735	32.15	32.886	43.009	35.809	32.889	59.793	36.715	38.1	38.307	39.629	34.36	48.071	28.133	28.608	27.609	30.89	27.685	28.621	29.538	30.749	31.604	38.359	35.703	38.22	25.068	38.621	32.5	65.111	63.966	72.884	77.143	68.821	68.238	69.7
gene10581	<NA>	0	0	0	0	0	0	0.039	0.385	20.137	23.039	0.582	0.43	0.04	0.041	0.039	0	0	0	0	0	0.099	0	0	0	0	0.051	0.11	0.086	0.045	0.043	0.087	0.127	0	0	0	0	0	0.042	0	0.168	0.055	0.049	0.088	0	0	0.042	0.048	0
gene10582	ctrc.L	0	0	0	0	0	0	0	0	0	0	0	0	0	0	0	0	0	0	0	0	0	0	0	0	0	0	0	0	0	0	0	0	0	0	0	0	0	0	0	0	0	0	0	0	0	0	0	0
gene10583	ska2.S	25.248	26.431	11.058	13.151	25.423	30.309	7.696	7.72	4.708	4.68	6.774	7.533	7.997	7.216	7.584	9.661	8.052	8.238	12.727	6.35	16.467	15.518	17.564	19.118	16.211	14.107	17.025	19.647	17.211	19.938	19.847	16.099	16.575	14.602	16.285	18.463	22.962	23.115	6.144	10.998	8.557	15.54	16.654	10.709	10.468	12.281	13.573	12.961
gene10584	<NA>	7.038	8.162	3.336	0.877	0.909	0	0	0	1.167	1.16	0	0	0	0	0	0.322	0	0	0.645	0	0	0	0	1.028	0	0.466	0	0	0	0	0	0	0	0	0	0	0	0	0	0	0	0	0	0	0	0	0	0
gene10585	p2ry11.L	0	0	0.042	0.111	0.115	0	0.091	0.099	5.292	5.48	0.052	0.15	0	0	0	0	0	0.03	0	0	0.115	0.3	0.13	0	0.131	0.176	0	0.1	0	0.202	0.051	0.049	0	0	0	0	0.058	0	0	0.26	0.127	0.057	0.051	0.123	0.063	0	0.112	0
gene10586	<NA>	1.647	1.914	0.955	2.197	0.759	1.072	0.516	1.127	0.278	0.277	1.18	0.708	0.706	0.633	0.817	1.076	0.636	0.653	0.692	0.876	1.362	1.363	1.601	1.226	1.987	1.778	1.384	0.85	0.89	1.049	1.056	0.373	0.828	0.731	0.898	1.117	0.71	1.446	0.726	0.738	0.6	0.964	1.542	1.166	0.949	1.556	1.695	0.719
gene10587	<NA>	0.92	0.901	1.472	1.259	1.003	0.397	0.796	0.521	0.322	0.064	0.591	0.918	0.694	1.046	0.835	0.64	0.813	0.972	0.853	0.938	1.059	0.999	1.31	0.964	1.724	0.823	0.78	1.093	0.824	1.147	0.622	0.776	0.979	1.307	1.091	0.744	1.465	0.906	0.896	0.626	0.611	1.289	1.65	1.241	1.263	1.016	1.078	0.614
gene10588	irak2.L	0.422	0.132	1.134	2.13	0.589	0.582	0.35	0.446	6.705	6.665	0.734	0.449	0.719	0.798	0.642	1.252	0.74	1.195	0.678	1.314	0.296	0.231	1.087	0.499	0.169	0.604	0.245	0.064	0	0.194	0.13	0.253	0.187	0.265	0	0.061	0.148	0	0.493	0.835	0.733	0.364	0.981	0.633	0.161	0.994	0.288	0.6
gene10589	gcg.L	0	0	0	0	0	0	0	0	0	0	0	0	0	0	0	0	0	0	0	0	0	0	0	0	0	0	0	0	0	0	0	0	0	0	0	0	0	0	0	0	0	0	0	0	0	0	0	0
gene1059	<NA>	0.361	0.44	0	0	0	0	0	0.182	0	0.937	0	0	0	0.088	0.166	0.149	0.117	0.22	0.074	0.357	0.317	0.11	0.238	0.712	0.882	0.323	0	0.091	0	0	0.093	0	0	0	0.109	0.259	0.211	0.271	0	0.119	0	0.311	0.373	0.226	0.345	0.177	0.41	0.642
gene10590	fabp3.S	0.135	0.282	0.087	0	0.236	0	0.187	0.204	0.151	0.903	0.749	0.514	0.384	0.394	0.468	0.836	0.593	0.742	0.418	0.903	0.474	0.247	0.402	0.133	0.541	0.242	0.393	0.617	0.323	1.349	0.313	0.405	0.601	0.106	0.244	0.097	0.713	0.203	0.527	0.669	0.261	0.35	0.524	0	0.516	0.398	0.346	0
gene10591	slc26a2.L	0	0	0	0	0.076	0	0	0	0	0	0	0	0	0	0	0.027	0.021	0	0	0	0.038	0	0	0	0.029	0	0	0	0	0	0	0	0	0	0	0	0	0	0	0	0	0	0	0	0	0	0	0
gene10592	fech.S	2.935	3.022	7.207	7.475	1.245	1.777	1.153	1.258	0.532	0.706	1.38	1.566	1.688	1.789	3.29	3.236	3.284	2.645	3.53	4.939	3.477	2.972	2.828	3.989	3.697	3.475	1.766	0.904	1.388	1.399	1.164	1.842	0.881	1.43	1.146	1.425	2.09	0.774	1.081	1.334	1.684	3.007	3.75	4.016	4.39	4.263	3.109	3.597
gene10593	zdhhc7.L	44.974	41.558	43.844	42.352	41.936	53.331	50.621	48.438	8.448	9.067	50.316	48.366	52.792	52.18	36.687	36.861	35.071	36.514	40.111	36.666	37.72	36.895	38.771	37.2	36.905	37.858	27.812	29.005	31.785	32.831	27.845	31.477	27.924	31.509	28.581	31.622	32.67	32.572	42.204	42.256	42.081	36.702	37.713	37.244	38.868	38.163	37.083	40.303
gene10594	med22.L	30.552	33.664	27.02	33.061	33.993	38.131	34.149	31.434	24.058	24.26	33.028	32.895	33.585	30.947	29.836	31.649	30.366	32.081	30.982	30.619	40.273	39.579	36.924	37.069	38.524	33.744	37.895	39.858	35.924	35.351	34.168	41.719	40.307	40.363	37.018	40.009	40.888	34.471	30.868	35.644	41.053	33.724	29.49	28.284	31.441	32.798	33.873	30.121
gene10595	<NA>	0	0	0.032	0	0	0.256	0.034	0.037	0	0	0	0.188	0.176	0.036	0.034	0.061	0	0.045	0.061	0	0.521	0.544	0.54	0.342	0.627	0.31	0	0	0.039	0	0	0	0.037	0	0.045	0	0	0	0.145	0	0	0.299	0.192	0.279	0.142	0.146	0.296	0.132
gene10596	<NA>	0	0	0	0	0	0	0	0	0	0	0	0	0	0	0	0	0	0	0	0	0	0	0	0	0	0	0	0	0	0	0	0	0	0	0	0	0	0	0	0	0	0	0	0	0	0	0	0
gene10597	pram1.S	0	0	0	0	0	0	0.234	0.051	0	0	0	0.154	0	0	0.093	0	0	0	0	0.05	0	0	0	0	0	0	0	0	0.054	0	0.052	0	0	0	0	0	0	0	0	0.067	0.13	0	0	0	0	0.05	0	0
gene10598	gngt2.1.S	0.188	0.196	0.601	0.316	0	0	0	0	4.625	5.433	0	0	0	0	0.13	0.116	0.183	0.687	0.697	0.836	0	0	0	0	0	0	0	0	0	0.144	0.145	0.141	0	0.147	0	0	0	0	0	0	0	0	0	0	0	0	0	0
gene10599	slc45a3.L	1.099	0.941	0.866	1.518	1.868	2.624	1.053	1.235	1.514	1.254	1.516	1.199	1.16	1.599	0.468	0.801	0.384	0.592	0.592	0.167	1.482	1.082	1.172	1.779	1.051	1.764	0.437	0.471	0.583	0.476	0.653	0.887	0.501	0.574	0.56	0.486	0.297	0.465	1.427	0.892	0.707	0.583	0.612	1.269	0.861	0.83	0.768	1.704
gene106	rpa3.L	197.148	203.084	187.583	206.182	182.985	208.904	146.251	149.114	78.944	81.8	145.065	158.109	144.881	160.629	145.064	141.611	120.33	154.1	175.079	124.551	181.327	195.239	216.222	205.953	224.962	186.711	187.27	184.479	194.748	186.766	199.759	194.512	169.097	182.897	189.493	200.614	185.29	208.512	154.163	162.862	156.689	149.207	137.402	138.852	141.307	140.795	141.309	143.919
gene1060	<NA>	0	0	0	0	0	0	0	0	1.165	0.463	0	0	0	0	0	0	0	0	0	0	0	0	0	0	0	0	0	0	0	0.08	0	0	0.077	0	0	0	0	0	0	0	0	0	0	0	0	0	0	0
gene10600	znf821.S	62.884	67.674	68.092	64.252	70.257	62.531	65.881	72.749	37.785	31.766	69.18	67.355	72.167	73.776	60.27	56.863	65.995	58.274	63.929	71.69	67.815	68.403	66.896	66.408	66.728	63.25	62.1	63.599	64.157	65.09	60.289	62.535	64.24	64.859	70.132	67.891	69.959	67.969	64.379	68.181	60.54	75.558	77.891	76.391	74.395	78.569	82.48	73.597
gene10601	<NA>	0.018	0.038	0	0	0	0	0	0.028	0	0	0	0.028	0.052	0	0	0	0	0.084	0.068	0	0	0	0	0	0	0	0.036	0	0	0	0	0	0	0	0	0.026	0	0	0	0	0.071	0	0.029	0	0	0	0	0
gene10602	<NA>	35.689	37.552	31.569	30.428	37.785	27.896	36.516	34.406	21.705	24.742	35.14	34.19	38.374	42.644	41.069	41.218	47.965	44.861	41.613	48.263	31.191	29.094	30.856	28.955	27.871	28.041	41.191	42.43	43.559	42.446	40.793	46.046	42.767	45.312	42.794	42.871	46.429	41.805	34.532	33.937	31.49	55.099	50.696	54.123	52.867	51.653	48.463	51.557
gene10603	zfhx4.L	20.264	19.73	0.801	0.65	1.644	1.758	0.16	0.222	0.536	0.516	0.134	0.153	0.23	0.281	2.575	2.016	1.31	2.316	3.143	3.082	0.352	0.184	0.367	0.29	0.412	0.29	0.254	0.247	0.184	0.154	0.095	0.394	0.172	0.133	0.167	0.155	0.461	0.244	0.135	0.138	0.164	0.772	0.491	0.449	0.56	0.501	0.579	0.495
gene10604	diras2.L	0	0	0	0	0	0	0	0.156	0	0	0	0	0	0	0	0.127	0	0	0	0	0.722	0	0	0	0.137	0	0	0.47	0	0.474	0.636	0	0.152	0.484	0.186	0	0.181	0.464	0	0	0.596	0.532	0	0	0	0.152	0.175	0
gene10605	fam210b.L	12.685	11.052	15.243	9.652	8.079	5.704	9.923	11.499	6.664	9.569	10.816	9.215	10.643	10.431	9.303	9	10.96	8.868	13.364	12.266	6.962	6.451	12.017	8.049	8.814	10.65	8.33	6.036	7.544	8.459	9.2	7.271	8.491	8.47	10.956	11.728	9.686	8.938	18.252	10.908	11.07	15.778	11.112	13.445	13.472	10.394	12.593	13.338
gene10606	tmem11.L	70.707	68.616	74.136	67.253	71.347	49.322	47.621	37.692	8.467	9.995	37.773	40.947	39.26	42.835	38.743	35.372	38.703	41.156	55.987	75.733	57.212	59.639	62.768	62.729	70.386	65.959	37.551	44.934	42.691	49.325	40.726	39.682	41.836	42.987	45.697	62.18	68.733	61.92	41.892	46.303	50.662	73.764	69.82	78.048	74.689	71.55	80.794	67.492
gene10607	kdm8.L	24.912	24.557	21.087	21.015	29.301	32.289	15.547	14.004	3.673	4.439	13.947	13.933	16.259	17.888	18.2	16.99	20.099	21.465	19.1	26.533	28.044	31.41	33.726	29.39	33.605	30.903	20.817	18.054	17.969	18.462	18.891	19.482	20.299	17.754	19.298	20.441	23.854	21.685	18.296	16.996	15.282	21.577	23.296	21.366	24.262	26.348	24.626	26.442
gene10608	cdk11b.L	73.844	72.815	48.23	48.67	55.21	77.137	70.692	77.684	66.249	73.844	77.109	78.027	84.228	89.17	68.997	69.393	78.886	73.867	63.419	77.034	70.275	74.997	69.095	74.047	65.289	73.112	80.699	74.932	74.87	74.066	67.423	74.44	71.747	74.339	79.011	74.407	69.197	80.456	57.159	78.652	72.699	79.774	79.579	80.896	76.965	79.375	72.552	78.838
gene10609	gpx7.L	0	0	0	0	0	0	0.153	0.167	0	0.247	0	0.168	0	0	0.306	0	0	0	0.548	0	0	0.203	0	0	0	0	0	0	0	0.17	0.171	0	0	0.174	0.2	0	0	0	0	0	0	0	0.172	0.416	0	0.163	0	0.197
gene1061	acsf3.L	1.304	1.42	1.161	0.763	0	0.977	0.314	0.771	0.254	0.378	0.628	0.258	0.241	0.495	1.097	1.332	0.994	1.347	1.121	1.597	1.392	2.798	1.011	1.565	1.057	1.115	0.659	0.431	0	0.174	0.438	0.849	0.252	0.178	0.102	0.652	0.498	0.34	0.441	0.336	0.109	0.195	0.791	0.425	0.325	0.835	0.483	0
gene10610	<NA>	4.899	4.648	22.91	25.482	1.243	0	15.163	15.745	1.395	1.387	14.651	15.153	14.788	18.014	5.419	4.955	4.252	6.185	4.625	3.038	51.064	49.812	47.815	47.608	51.601	44.593	49.505	55.921	58.371	53.415	54.895	54.316	46.681	45.645	49.226	54.265	55.534	52.127	17.687	16.912	12.894	9.517	9.526	7.517	7.649	9.443	9.411	10.137
gene10611	six2.L	0	0.046	0	0	0	0	0.061	0.133	0	0	0.279	0.067	0	0.064	0	0	0.043	0.04	0	0	0	0	0	0.087	0	0	0.085	0	0.07	0	0	0.066	0	0	0.159	0	0	0	0.086	0.087	0.255	0	0.068	0	0	0	0	0
gene10612	<NA>	15.48	12.641	0.327	0	1.041	1.617	6.551	7.989	0.095	0.379	5.935	7.384	6.898	7.694	0.236	0.369	0.665	0.351	0.527	0.19	9.569	10.989	10.221	9.588	9.541	8.997	0.826	0.583	0.203	0.327	0.461	0.831	0.505	0.869	0.308	0.49	0.15	0.896	7.056	8.097	5.844	1.617	1.454	2.079	1.953	1.507	2.616	2.123
gene10613	vamp7.S	18.258	17.764	13.963	13.485	17.156	20.438	16.343	14.862	5.467	5.724	16.717	15.214	16.733	18.673	14.727	14.738	13.233	15.46	16.552	14.706	19.673	20.955	21.261	21.361	19.434	18.812	16.18	19.212	16.968	16.661	16.075	16.837	15.263	16.463	16.031	17.107	17.277	17.254	15.79	14.045	15.372	18.048	17.821	16.737	16.443	17.721	18.068	17.29
gene10614	<NA>	0	0	0.051	0	0	0	0	0.061	0	0	0	0	0	0	0	0	0	0	0	0	0	0	0.08	0	0	0	0	0	0	0	0	0	0	0	0.072	0	0	0	0	0	0.077	0.069	0	0	0	0	0	0
gene10615	aipl1.L	0.04	0	0	0	0	0	0	0	0	0	0	0	0	0	0	0	0	0	0.05	0	0	0	0	0	0	0	0	0	0	0.062	0	0	0	0	0	0	0	0	0	0.079	0	0	0	0.075	0	0	0.068	0
gene10616	fam151a.S	0	0	0	0	0	0	0	0	0	0	0	0	0	0	0	0	0	0	0	0	0	0	0	0	0	0	0	0	0	0	0	0	0	0	0	0	0	0	0	0	0	0	0	0	0	0	0	0
gene10617	wbp11.L	41.351	39.74	52.992	46.911	52.389	51.674	34.09	31.89	38.174	38.017	35.045	34.08	42.056	37.366	41.19	44.241	47.088	42.211	46.156	51.183	37.873	34.17	37.71	34.926	31.115	33.873	33.096	31.1	32.542	29.482	31.028	32.273	31.615	38.551	33.21	44.184	42.77	37.285	39.167	30.99	36.445	54.859	51.443	57.491	55.028	53.648	59.404	54.407
gene10618	rusf1.S	2.142	1.267	2.01	1.682	0.249	0.246	1.482	1.51	0.32	0	0.903	0.976	1.115	0.727	1.283	1.501	1.948	1.5	2.03	2.435	2.629	2.479	2.546	1.267	2.282	3.447	3.18	2.496	1.931	1.314	2.206	2.354	2.22	1.231	1.805	1.744	1.756	2.357	0.973	1.13	1.929	2.461	1.992	2.678	1.772	2.313	1.582	2.032
gene10619	<NA>	0.861	0.711	0.78	2.535	0.75	2.967	0.298	0.217	0.08	0	0.113	0.436	0.153	0.209	0.05	0	0	0	0.044	0.16	0.817	0.786	0.781	1.556	0.764	0.769	0.208	0.218	0.057	0.11	0.055	0.269	0.212	0.056	0.194	0.155	0.126	0.054	0.07	0.426	0.346	0.68	1.445	1.345	1.437	0.739	0.55	0.957
gene1062	fignl1.L	36.609	35.963	31.965	32.945	30.864	26.456	32.406	31.115	5.082	5.923	34.801	34.137	31.78	33.952	35.187	33.495	35.702	41.029	42.695	35.238	28.212	28.908	30.946	31.12	34.675	27.513	29.419	31.366	30.89	28.284	31.75	33.203	29.273	30.986	30.124	32.18	35.895	36.015	30.032	35.312	31.891	33.604	32.102	28.856	31.01	31.937	32.893	31.958
gene10620	znf326.S	300.949	294.322	254.234	289.872	296.035	345.893	305.413	344.438	475.678	480.413	335.116	352.394	336.105	359.21	294.116	302.366	280.459	306.962	270.299	306.812	327.533	353.168	361.276	364.139	379.081	347.208	345.2	341.952	360.795	355.505	358.592	346.035	346.562	349.658	372.121	317.968	290.042	317.411	311.234	389.647	355.747	301.356	284.617	276.399	290.255	295.679	301.803	291.538
gene10621	<NA>	1.645	1.491	0.526	1.166	1.132	1.716	1.887	2.125	2.857	3.659	2.225	1.545	1.597	1.795	0.748	1.391	1.075	0.791	1.338	1.348	0.835	0.316	0.386	0.299	0.865	0.774	0.964	1.184	0.861	1.029	1.103	1.103	1.186	0.78	1.446	0.84	0.988	1.169	1.222	1.498	1.546	3.133	2.348	3.044	3.263	1.912	2.729	3.31
gene10622	lhx6.L	0	0.04	0	0	0	0	0.053	0.087	0	0.085	0	0	0	0	0.027	0	0	0	0	0	0.067	0.14	0.038	0	0.051	0.034	0.037	0.058	0.092	0.088	0	0.058	0.028	0.09	0.104	0	0	0	0	0.038	0.037	0.066	0	0.036	0	0.028	0	0
gene10623	<NA>	0	0	0	0	0	0	0	0	0	0	0	0	0	0	0	0	0	0	0	0	0	0	0	0	0	0	0	0	0	0	0	0	0	0	0	0	0	0	0	0	0	0	0	0	0	0	0	0
gene10624	mad1l1.L	53.604	49.644	45.866	48.158	43.889	43.875	56.724	56.325	42.235	41.026	56.005	60.286	58.412	67.267	54.129	50.177	48.753	55.081	49.647	55.809	40.716	41.392	46.787	48.003	43.856	48.532	48.107	46.999	50.436	45.103	47.756	49.501	48.114	51.438	47.008	44.683	51.079	52.436	49.761	57.026	58.772	59.231	57.002	53.867	53.31	56.214	51.032	55.235
gene10625	senp7.L	52.99	52.227	41.917	52.974	45.292	56.635	35.399	34.728	11.74	8.753	35.005	39.596	34.897	40.028	26.431	27.686	23.479	32.534	39.161	28.733	44.265	40.929	49.105	46.046	51.791	42.389	35.369	34.792	35.101	37.668	39.455	35.864	31.991	31.808	28.307	37.504	33.344	41.774	30.194	37.68	38.1	34.471	35.168	32.16	32.416	32.588	36.32	33.295
gene10626	plod1.L	17.587	16.72	11.635	14.87	11.036	12.676	21.422	19.896	30.872	33.098	19.925	20.695	23.783	20.57	11.547	11.346	9.997	12.812	12.44	13.566	73.31	69.96	67.924	72.914	69.24	64.828	34.72	30.201	28.699	35.761	31.26	33.781	36.587	33.815	31.608	32.724	32.739	27.46	20.199	17.42	19.31	5.453	6.494	5.613	5.277	6.421	5.877	6.539
gene10627	rufy3.L	37.38	38.713	35.904	38.342	41.751	47.244	44.801	43.446	12.719	13.876	43.613	46.387	44.634	50.635	33.998	33.734	36.297	34.304	40.138	36.602	38.719	40.406	38.691	36.148	38.906	38.886	38.618	40.089	39.419	36.717	33.146	36.662	33.552	35.629	36.19	44.261	44.625	44.958	38.775	46.587	41.651	56.117	54.424	56.682	53.272	54.184	50.563	56.704
gene10628	igsf9.L	8.625	8.66	7.105	6.134	3.844	3.507	2.669	2.673	3.177	2.687	3.234	2.672	2.962	3.114	3.912	4.493	4.79	4.047	4.546	4.305	3.325	3.718	2.645	3.323	2.554	2.198	10.137	9.906	8.663	8.24	9.313	10.462	10.055	10.91	9.607	12.789	12.431	10.24	3.259	2.326	3.027	5.095	5.863	5.643	5.096	5.804	5.056	5.747
gene10629	rps9.L	24.967	29.626	23.961	20.007	18.142	18.444	24.887	20.881	30.927	31.736	23.973	23.024	20.666	24.865	27.122	29.945	41.116	28.783	41.339	57.509	15.111	19.826	13.541	21.689	21.177	19.663	10.936	10.166	9.691	11.852	8.493	11.801	10.341	8.85	13.688	14.734	15.66	14.941	38.478	25.277	24.094	21.001	19.117	21.737	24.674	19.693	18.486	14.799
gene1063	<NA>	0	0	0	0	0	0	0	0	0	0	0	0	0	0	0	0	0	0.097	0	0	0	0	0	0	0	0	0	0	0	0	0	0	0	0.166	0	0	0	0	0	0	0	0	0	0	0	0	0	0
gene10630	bend3.L	3.722	3.088	3.297	3.212	2.663	3.751	3.593	3.777	9.311	8.916	2.475	3.827	3.277	3.277	3.905	4.153	3.589	3.383	4.507	4.415	2.576	1.918	3.289	2.447	2.847	3.208	2.439	3.278	2.884	2.752	2.447	3.06	3.193	2.782	2.447	3.044	2.48	2.005	2.787	3.284	3.352	4.309	3.816	4.223	3.861	3.204	3.675	4.107
gene10631	maea.S	83.687	84.373	92.499	94.071	91.373	87.666	108.239	106.149	65.733	70.464	111.81	105.719	121.861	114.583	96.684	95.392	102.295	103.893	102.446	85.644	91.469	85.834	81.419	84.741	79.262	82.213	88.83	84.891	88.217	90.022	90.66	87.941	89.492	91.466	87.991	79.375	86.528	85.773	110.744	100.588	108.315	119.949	112.461	115.208	104.799	109.82	107.49	108.662
gene10632	cct4.L	88.383	91.617	69.066	70.851	66.141	61.204	89.46	80.383	30.502	26.898	81.276	79.228	96.946	77.73	66.645	66.316	78.069	80.193	84.805	87.36	67.548	61.574	59.445	58.104	57.24	60.242	81.105	84.888	82.791	86.069	84.896	80.456	93.984	91.56	86.162	101.956	116.414	108.456	91.164	81.64	89.111	64.412	67.809	68.027	71.223	67.006	68.559	66.755
gene10633	hspa5.S	234.274	241.897	258.04	279.686	187.77	200.506	274.524	266.633	70.071	67.172	287.353	266.579	264.36	301.453	216.597	209.37	202.162	216.41	270.535	263.182	226.035	224.74	226.543	220.422	232.675	227.781	178.133	171.446	162.298	218.651	205.541	198.19	237.509	228.662	235.204	269.958	317.463	288.351	242.661	256.013	260.52	237.672	241.364	251.988	234.954	256.829	228.821	236.467
gene10634	kcmf1.L	58.987	57.747	57.422	57.594	54.052	74.567	48.874	49.067	16.453	14.449	51.103	47.077	52.682	51.81	39.569	39.66	40.44	45.817	50.18	53.139	62.892	65.319	65.9	63.923	67.007	69.919	45.972	50.071	47.043	43.742	44.002	46.09	44.42	45.831	42.1	46.617	50.089	51.752	47.306	52.496	48.11	47.958	45.532	47.115	50.402	51.119	45.566	48.019
gene10635	hspbp1.L	30.242	29.239	26.151	23.999	12.658	12.291	7.137	8.465	18.093	20.252	6.646	6.479	5.421	6.206	7.394	5.037	5.334	6.456	12.358	13.215	16.185	15.009	12.611	13.059	13.905	12.067	8.137	7.936	10.43	8.886	7.375	9.348	5.75	6.585	5.979	11.069	10.734	12.993	5.082	10.074	6.513	13.825	13.42	9.91	10.692	12.467	11.391	9.736
gene10636	prelid3b.S	2.47	2.675	2.385	2.823	2.276	2.731	2.064	1.619	5.006	3.939	2.285	2.053	1.852	1.288	3.415	4.148	2.951	2.682	4.321	4.422	2.778	3.407	3.046	2.574	2.234	3.5	2.527	2.692	2.372	3.145	2.735	1.536	2.967	1.899	2.357	3.013	4.584	2.867	1.996	1.567	2.788	2.008	1.95	3.671	3.024	2.951	2.7	3.812
gene10637	aqp1.S	0.042	0	0	0	0	0	0	0	0	0	0	0	0	0	0	0	0	0	0	0	0	0	0	0	0	0	0	0	0	0	0	0	0	0	0	0	0	0	0	0	0	0	0.064	0	0	0	0	0
gene10638	ezh2.S	42.114	44.68	23.279	25.707	33.423	42.969	45.456	47.837	32.94	34.29	49.692	49.307	49.118	53.948	41.809	39.572	36.731	40.378	37.987	44.218	35.972	40.227	39.475	35.538	35.694	39.48	34.557	37.26	36.226	39.67	34.213	38.44	37.83	39.608	36.869	36.167	38.474	36.676	42.242	46.281	43.958	36.139	39.442	38.738	36.309	39.565	34.787	42.661
gene10639	vipr2.S	0	0	0	0	0	0	0	0	0	0	0	0	0	0	1.176	0	0.044	0	0	0	0	0	0	0	0	0	0	0	0	0	0	0	0	0	0	0.064	0	0	0	0	0	0	0	0	0	0	0	0
gene1064	<NA>	1.04	1.169	0.102	0.539	0.558	0.276	0.443	0.846	1.253	1.068	0.633	0.608	0.454	1.164	0.996	1.088	2.105	0.731	1.385	0.949	2.806	1.609	1.268	0.947	1.918	1.574	0.93	1.581	1.4	1.227	0.865	1.199	0.592	0.752	0.867	1.495	1.124	1.561	0.623	0.475	0.772	1.103	0.372	0.6	1.069	0.471	0.818	0.854
gene10640	rdh11.S	0.236	0.164	0.101	0	0	0	0.109	0.119	0	0	0.249	0	0	0.114	0.326	0	0.306	0	0.291	0	0.138	0	0	0.775	1.465	1.545	0	0.119	0	0.723	0.364	0.706	1.163	0.739	1.135	0	0	0	0	0	0.455	0.135	0	0	0	0	0.134	0
gene10641	znf330.L	1.208	1.182	0	0	0.79	0	0.313	0.114	0	0	0.119	0	0.214	0.549	0.104	0.28	0.368	0.069	0.28	0	0.132	0	0.15	0.447	0.503	0.81	0.146	0.115	0.6	0.347	0.35	0.113	0.224	0.355	0.136	0.325	0.663	0.227	0.294	0.299	0	0	0.351	0.142	0.144	0.111	0.257	0.134
gene10642	rgs10.L	0	0	0.423	0	0	0	0	0	0.443	0	0	0	0.094	0	0.091	0	0	0	0.163	0.979	0	0.121	0	0	0	0.118	0.128	0	0	0	0	0.099	0	0	0	0	0	0	0	0.131	0.255	0	0	0.743	0.126	0	0.113	0
gene10643	ehhadh.S	9.849	9.479	9.5	8.412	10.876	11.859	8.7	9.571	4.209	5.23	8.767	8.833	8.884	9.289	11.051	10.065	9.282	10.852	13.186	13.282	5.77	6.467	5.637	5.174	4.812	5.221	10.064	9.367	11.139	10.665	8.562	7.934	11.907	9.734	10.995	12.374	14.733	12.885	7.13	5.09	8.263	9.724	10.087	9.281	9.965	8.453	7.717	10.825
gene10644	lgals3.L	112.275	111.941	120.728	112.527	94.116	88.532	112.035	101.494	68.569	70.095	99.376	99.306	105.096	97.65	90.821	94.472	106.717	96.226	117.793	118.18	113.315	96.13	104.686	94.69	92.685	102.923	92.012	97.403	102.018	102.651	95.619	91.263	111.943	111.302	98.919	122.104	129.31	123.143	114.114	111.641	112.658	101.769	117.289	115.508	111.394	108.681	100.733	107.104
gene10645	pip4k2c.L	59.866	57.121	53.055	54.435	48.702	54.956	58.19	57.133	39.316	42.405	56.679	57.41	66.732	61.087	44.562	42.553	42.206	48.864	47.232	43.82	52.324	52.346	48.44	52.705	52.221	52.219	45.328	46.96	44.85	48.541	41.876	46.75	47.86	46.65	43.885	46.729	47.273	45.949	53.987	52.93	53.824	38.668	41.568	38.694	38.712	39.46	39.689	40.072
gene10646	brox.S	19.932	19.984	21.907	24.078	16.732	21.242	25.526	25.053	19.062	18.582	28.973	24.497	30.103	27.857	24.528	23.158	27.032	23.537	23.058	25.016	16.022	17.76	14.826	14.762	14.484	15.527	17.297	16.973	17.628	15.475	18.14	18.773	19.407	20.932	20.762	19.846	19.318	16.63	24.232	24.128	25.461	23.09	22.432	25.824	25.728	27.581	24.241	22.281
gene10647	thyn1.L	76.216	72.091	52.208	62.037	64.292	85.321	56.181	59.92	66.967	58.048	54.372	62.758	63.038	66.744	69.151	66.823	63.857	83.347	74.766	64.638	38.124	33.496	38.973	41.663	38.2	41.289	60.761	61.233	66.707	71.945	80.453	67.645	68.68	64.911	75.742	64.574	54.741	67.438	49.793	69.225	55.362	74.418	72.222	72.044	71.341	71.659	82.759	78.812
gene10648	p2ry1.S	0	0	0	0	0	0	0	0	0.088	0	0	0	0	0	0.216	0	0	0.143	0.242	0.058	0	0	0.155	0	0	0.07	0.303	0.059	0	0.06	0	0.059	0	0	0.141	0.056	0.069	0.059	0	0	0	0	0	0	0	0	0	0
gene10649	<NA>	4.33	5.13	5.989	7.089	3.537	2.017	3.455	3.182	6.11	6.594	3.64	2.903	2.325	3.859	5.555	5.256	6.536	4.633	4.919	7.46	2.94	3.137	3.091	2.385	3.117	3.348	3.475	3.854	2.792	3.051	3.916	3.916	4.793	4.34	3.663	4.82	4.59	3.336	5.923	3.394	3.839	8.94	10.398	8.631	9.9	10.337	11.1	12.069
gene1065	eya1.S	0.23	0.295	0.023	0	0	0	0.587	1.387	8.812	6.835	1.676	0.268	0.125	0.694	0.61	0.568	0.619	0.307	0.699	0.34	1.145	0.355	0.49	0.662	0.776	0.221	0.958	2.335	1.067	1.273	1.255	1.376	0.915	0.387	0.734	0.837	1.644	1.033	1.341	0.873	0.477	0.213	0.082	0.066	0.034	0.052	0.09	0.22
gene10650	art1.L	0	0	0	0	0	0	0	0	0	0	0	0	0	0	0	0	0	0	0	0	0	0.107	0	0	0	0	0	0	0	0	0	0.088	0	0	0	0	0	0	0	0	0	0	0	0	0	0	0	0
gene10651	<NA>	11.48	9.586	12.204	12.483	8.009	9.742	5.622	3.202	7.904	8.643	4.749	4.292	2.506	3.855	3.174	6.114	4.474	5.325	8.516	7.07	5.883	3.873	1.05	3.832	4.939	2.842	2.052	2.953	5.338	2.438	3.546	3.969	3.138	1.937	0.319	6.598	8.375	2.65	3.438	3.493	3.409	10.045	5.201	9.605	5.73	11.702	5.718	5.025
gene10652	<NA>	3.488	3.908	68.009	61.881	5.774	6.114	0.027	0	0.309	0.044	0	0.03	0	0	19.426	20.951	20.234	17.77	16.421	10.518	27.811	25.678	24.163	25.69	26.008	25.439	23.622	25.163	25.295	24.965	23.833	26.573	23.631	24.953	23.454	23.841	24.676	25.933	0	0.039	0	21.09	19.364	22.875	18.992	20.861	19.443	22.497
gene10653	vat1l.L	0	0	0	0	0	0	0.07	0	0.338	0.28	0	0	0.036	0	0	0	0	0	0	0	0	0	0	0.099	0	0.045	0	0	0	0.077	0	0.038	0.037	0	0.046	0	0	0	0	0	0	0	0.039	0	0	0	0	0
gene10654	sorbs3.L	9.617	9.289	12.798	10.122	12.197	9.946	8.276	7.951	4.5	4.628	7.273	7.33	9.403	9.235	8.92	9.554	10.152	9.824	10.571	11.147	3.464	3.195	3.083	3.414	2.678	3.126	6.061	6.671	6.424	5.819	5.969	6.104	6.135	6.795	6.505	8.19	10.134	6.061	11.063	7.47	9.348	8.889	8.103	10.492	9.644	9.834	9.326	11.193
gene10655	tgfa.S	0	0.055	0.134	0	0	0	0	0.079	0.234	0.117	0.166	0.159	0.074	0	0.072	0	0.051	0.144	0.065	0	0	0	0	0	0	0.187	0.101	0.239	0.083	0	0.162	0.078	0.233	0	0	0	0.092	0	0.102	0	0.101	0	0.081	0	0.1	0.154	0.089	0
gene10656	sntg1.L	9.949	10.194	12.468	13.056	8.278	7.474	8.148	8.412	1.991	1.675	9.058	9.532	8.063	8.798	6.752	7.983	6.558	9.382	8.915	7.545	7.641	6.13	7.82	6.751	7.476	6.406	8.485	9.192	7.767	8.47	8.565	9.026	7.939	7.188	8.861	9.082	8.937	9.793	8.529	9.658	8.192	8.73	8.311	8.088	8.71	8.736	7.622	7.629
gene10657	ap4s1.L	11.465	13.975	14.028	23.94	15.47	9.232	9.497	10.746	6.554	8.377	10.323	10.169	10.806	12.297	7.173	9.724	7.826	8.257	11.794	8.685	17.312	18.964	18.234	16.174	19.391	15.411	13.45	11.83	14.242	13.733	13.96	12.162	8.548	10.753	12.544	14.068	13.668	17.957	12.381	15.061	9.529	12.835	12.84	12.868	11.339	12.444	12.121	10.417
gene10658	laptm4b.L	0.036	0.037	0.046	0	0.498	0.123	0.049	0	0	0	0	0	0	0	0	0	0	0	0	0	0	0	0	0.07	0	0	0	0	0	0	0	0.053	0	0	0	0	0	0	0	0	0	0.061	0.055	0	0	0.105	0	0
gene10659	<NA>	7.116	7.379	8.685	8.774	8.601	7.368	5.428	5.429	1.577	0.731	4.68	5.315	5.399	6.424	4.221	3.861	4.667	5.193	6.94	6.338	3.582	2.489	2.187	4.215	3.378	3.821	6.413	5.284	5.641	5.475	5.768	5.208	4.798	5.153	4.242	5.872	7.507	6.097	5.304	5.713	5.576	5.626	6.88	5.726	4.617	5.187	5.083	4.803
gene1066	<NA>	0	0	0	0	0	0	0	0.353	0	0	0.37	0	0	0	0.323	0.723	0	0	0	0	0	0.214	0	0	0	0	0	0.533	0.186	0.179	0	0	0	0.183	0	0	0	0	0.683	0.462	0	0	0	0	0	0	0	0
gene10660	mthfd1.L	120.439	123.116	121.174	117.374	117.6	96.158	119.98	107.726	62.564	65.579	111.25	109.711	115.593	104.657	113.678	116.164	137.476	115.987	149.308	168.119	128.776	119.243	127.673	120.268	116.989	126.483	91.113	92.394	91.099	86.218	86.727	88.24	81.461	94.577	83.838	120.945	125.922	118.364	109.501	114.063	108.116	145.976	145.023	146.867	144.916	143.907	147.721	139.267
gene10661	ctla4.L	0	0	0	0	0	0	0	0	0	0	0	0	0	0	0	0	0	0	0	0	0	0	0	0.08	0	0	0	0	0.065	0	0	0.061	0	0	0.037	0	0	0	0	0	0	0	0	0	0	0	0	0
gene10662	ppp4c.L	156.155	165.307	182.112	182.35	180.541	121.575	191.281	194.333	197.445	195.738	189.351	200.225	203.185	212.062	209.406	210.8	245.339	243.337	210.578	254.761	200.487	213.324	204.677	211.803	223.739	217.444	197.192	206.706	206.748	222.8	203.161	211.272	206.971	221.89	219.025	207.478	207.89	219.581	200.494	200.058	185.706	236.18	225.824	221.527	221.196	228.059	225.947	222.193
gene10663	ppme1.S	33.829	36.293	39.206	36.742	36.98	31.595	34.757	32.715	31.264	31.879	36.022	34.801	40.735	36.603	36.584	34.877	45.779	36.036	38.99	52.088	31.898	34.318	33.371	31.011	31.41	34.7	31.493	29.638	29.369	28.387	29.907	32.712	34.385	40.129	33.428	42.861	40.002	35.189	39.53	34.031	40.493	51.873	52.221	54.676	51.441	51.99	56.19	50.648
gene10664	etnppl.L	0	0	0	0	0	0	0	0	0	0	0	0.071	0	0	0.065	0	0	0	0.232	0	0	0	0	0	0	0	0	0	0	0	0	0	0.07	0	0	0	0	0.071	0	0	0.091	0	0	0	0.09	0	0	0
gene10665	peli2.L	30.625	28.204	26.298	24.935	26.461	21.43	18.857	16.713	22.54	25.793	20.385	19.424	20.198	18.679	20.486	20.858	24.495	20.097	23.934	31.6	29.047	26.013	26.084	27.222	25.545	24.407	20.243	21.329	19.815	20.391	21.163	20.072	18.669	20.716	19.704	24.061	26.959	23.796	24.055	20.424	20.519	28.597	28.982	31.546	33.992	30.82	32.513	29.733
gene10666	znf507.L	26.88	27.072	33.497	35.687	31.881	43.465	26.493	27.376	14.263	14.981	26.153	30.141	29.467	28.638	21.838	22.351	19.683	24.374	28.151	20.12	32.224	32.639	33.511	32.772	33.581	30.821	19.408	20.993	20.213	21.396	19.536	22.704	19.971	21.957	19.331	19.008	19.608	20.633	23.334	26.799	25.146	15.925	14.632	14.998	14.995	16.261	16.532	17.465
gene10667	cbfa2t3.S	2.421	2.864	12.909	15.12	10.697	7.698	0.707	0.691	1.324	0.957	0.425	0.449	0.305	1.057	1.637	1.663	1.913	1.45	2.395	1.396	2.311	1.868	1.652	2.016	1.863	1.587	2.448	2.944	2.567	1.98	2.036	3.265	1.553	2.361	3.401	3.711	3.591	4.44	0.681	0.106	0.987	15.717	14.968	14.933	15.402	13.744	16.87	15.404
gene10668	<NA>	26.597	27.623	46.149	45.477	30.273	31.282	42.271	36.507	20.305	19.672	38.268	35.954	39.234	39.893	46.363	47.958	52.686	44.873	48.002	53.814	25.015	27.337	26.44	25.547	26.226	26.334	18.718	19.49	19.923	22.892	17.265	21.082	21.318	24.215	19	21.541	24.943	23.384	38.465	33.812	38.516	45.44	44.177	42.971	41.159	44.387	41.12	46.009
gene10669	rwdd2a.L	5.964	5.836	6.487	8.28	4.68	5.911	5.675	4.28	1.335	0.663	5.659	3.397	6.876	5.64	3.504	3.133	3.704	4.631	5.438	4.863	1.699	1.907	3.396	2.794	2.681	2.932	2.887	3.853	3.557	3.201	2.303	3.686	3.752	5.14	3.635	3.213	3.273	4.139	3.918	6.045	5.468	3.34	3.813	2.936	5.833	5.159	4.446	5.303
gene1067	dok6.S	0.039	0.041	0.099	0	0	0	0	0	1.216	0.518	0	0	0	0	0.054	0.144	0.038	0.035	0.048	0	0	0	0	0	0	0	0	0.118	0	0	0.18	0.116	0	0.243	0	0	0	0.233	0	0	0	0	0	0	0	0	0	0
gene10670	dnajc18.S	0.118	0.062	0.151	0.099	0.206	0	0.123	0.178	0	0	0.047	0.179	0	0.043	0.082	0.036	0.144	0	0.073	0.131	0	0	0	0.233	0	0.106	0	0.09	0	0	0	0.044	0.044	0.046	0	0.042	0.052	0	0	0.117	0.114	0.051	0.046	0.277	0.056	0	0.05	0.157
gene10671	brap.S	7.292	7.721	5.544	7.042	9.362	11.075	8.483	8.079	4.966	5.078	7.955	8.828	6.478	9.809	7.948	6.271	7.042	8.457	8.126	6.831	7.522	6.875	8.541	7.17	8.191	7.974	6.794	6.49	7.026	6.872	6.464	6.998	7.416	6.425	5.84	6.499	6.05	6.565	7.365	8.402	9.097	5.026	6.715	5.747	5.163	6.535	5.546	6.013
gene10672	numa1.L	90.663	89.694	96.903	83.066	81.95	85.613	73.508	69.456	54.073	56.141	77.293	70.887	84.21	80.115	74.106	77.706	79.452	73.962	80.626	87.884	72.994	68.905	68.471	64.709	62.152	64.073	68.801	68.95	69.818	68.904	69.781	76.441	70.558	74.6	65.122	84.507	79.538	72.541	73.834	69.166	75.974	101.071	98.503	106.868	102.024	96.573	98.488	103.073
gene10673	cryl1.L	9.023	6.879	5.896	8.184	4.018	4.412	8.059	8.701	2.577	1.708	9.412	13.705	9.171	10.334	13.89	11.154	13.652	14.44	14.398	20.303	8.189	8.654	7.985	11.106	9.033	9.039	3.47	4.572	3.868	4.613	2.669	4.314	4.074	4.613	3.12	3.586	2.36	4.321	11.087	5.948	13.339	12.351	9.521	10.08	8.182	11.494	12.322	8.534
gene10674	ccdc149.S	27.057	28.128	23.047	21.437	12.602	12.64	35.854	35.54	19.103	18.812	35.553	39.186	37.747	39.755	28.712	30.304	31.755	31.736	31.399	37.338	28.761	27.242	25.975	25.81	24.485	28.375	34.93	35.596	35.586	35.422	30.919	34.402	34.865	33.048	35.186	33.262	39.715	35.258	34.281	35.569	31.508	29.241	27.209	27.703	27.682	28.173	27.134	27.126
gene10675	mrpl18.L	107.821	105.43	102.169	96.241	103.625	109.249	126.268	132.785	110.247	101.058	129.602	153.616	143.159	154.35	111.417	109.722	108.896	123.95	108.813	109.938	103.085	117.864	114.511	116.211	130.07	117.085	125.132	132.473	142.552	137.455	133.077	131.31	120.77	116.005	133.021	125.217	126.31	131.326	145.313	160.119	145.264	128.427	143.701	107.943	144.106	140.339	134.58	127.232
gene10676	slco4c1.L	0.14	0.204	0.286	0.753	0.097	0.289	0.348	0.591	0.125	0	0.486	0.679	0.278	0.651	0.193	0.242	0.054	0.255	0.069	0.124	0.196	0.153	0.277	0.165	0.298	0.35	0.325	0.382	0.578	0.343	0.259	0.335	0.166	0.569	0.353	0.321	0.344	0.587	0.272	0.387	0.863	0.145	0.433	0.052	0.267	0.453	0.095	0.497
gene10677	exoc6b.L	11.581	12.742	20.391	19.456	11.474	11.013	5.843	5.459	3.745	5.372	7.308	5.632	7.447	6.917	9.175	10.367	10.078	9.155	10.18	8.261	5.601	6.568	5.085	4.913	5.039	5.032	8.69	9.134	9.437	9.683	8.988	8.576	8.502	9.893	8.517	10.246	11.121	10.015	6.404	4.25	5.212	6.816	6.307	8.166	7.548	5.935	8.717	7.743
gene10678	lbx1.L	0	0	0	0	0	0	0	0	0	0.115	0	0	0	0	0	0	0	0	0	0	0	0	0	0	0	0	0	0	0	0	0	0	0	0	0	0.074	0	0	0	0	0	0	0	0	0	0	0	0
gene10679	gstk1.L	18.314	17.398	20.347	21.776	12.24	14.744	9.865	13.42	2.454	4.391	9.018	10.66	9.803	9.573	7.581	9.896	11.324	8.416	12.337	13.332	15.957	14.229	15.423	12.112	11.537	15.294	12.105	13.169	13.605	10.764	11.857	13.966	14.936	10.827	12.873	21.429	20.03	23.531	15.157	15.616	10.371	22.112	18.356	18.302	25.532	20.344	17.566	12.87
gene1068	slc16a9.L	0	0	0.35	0	0	0	0.227	0.496	6.858	8.156	0.173	0	0.078	0	0.151	0.203	0.213	0	0.203	0	0.096	0	0	0	0.146	0	0.212	0.25	0.435	0.084	0.338	0	0	0.257	0.494	0.079	0.096	0	0.107	0.108	0.211	0.377	0.424	0.103	0.209	0.322	0.093	0
gene10680	acat2.L	85.681	84.175	62.22	68.628	58.357	57.453	69.558	67.735	42.411	36.49	66.77	76.734	70.388	74.929	76.081	81.681	94.229	84.248	73.123	94.573	68.975	75.962	64.728	68.315	73.11	68.71	78.72	82.656	73.91	77.682	71.369	76.18	74.791	75.789	80.852	80.946	78.853	87.379	73.792	73.936	68.998	93.934	90.858	86.403	88.928	95.743	86.755	83.443
gene10681	h2az1.L	561.884	559.583	483.489	579.706	472.037	414.519	683.036	775.692	1341.61	1327.18	684.017	791.219	659.62	670.056	612.352	592.84	557.509	607.885	517.152	567.168	609.046	672.898	706.485	718.68	805.873	691.903	713.269	698.33	738.573	768.382	855.137	749.29	786.578	805.784	915.575	687.962	650.212	737.878	695.309	824.309	751.047	598.7	652.639	532.544	613.364	602.623	610.787	555.96
gene10682	mib2.S	17.892	17.517	31.346	30.358	23.295	21.58	37.145	37.755	17.427	19.187	36.131	38.781	37.943	40.554	27.463	27.572	30.539	27.874	29.402	30.949	23.763	23.375	21.382	21.143	22.941	23.53	31.212	30.082	31.673	30.503	28.968	28.727	31.596	30.317	29.509	32.294	37.093	33.578	37.422	36.069	38.148	24.464	24.522	22.923	24.128	22.896	24.987	22.657
gene10683	napa.L	23.201	23.029	24.304	22.584	23.206	21.074	21.525	22.338	16.224	17.14	23.833	23.321	25.902	25.235	23.036	24.393	22.381	24.573	22.849	27.95	21.434	21.512	21.74	21.421	20.182	18.505	24.502	24.031	20.351	24.202	24.067	25.347	24.372	24.997	23.056	26.024	27.364	23.124	23.69	22.381	26.396	25.48	25.03	25.86	26.751	22.69	23.935	26.595
gene10684	zfand6.L	132.344	130.742	110.32	124.645	118.157	137.062	137.563	145.31	60.204	60.09	142.292	145.676	141.966	151.427	103.535	96.412	107.705	112.052	117.158	114.664	138.351	148.6	160.419	154.03	168.196	142.464	112.954	126.169	121.45	128.468	141.913	130.067	123.12	117.609	135.933	135.301	119.178	135.497	126.698	163.836	143.168	135.907	135.646	127.358	132.935	134.874	142.642	135.294
gene10685	ing1.S	19.796	18.496	17.796	19.063	17.017	20.493	14.591	13.641	2.133	3.493	15.875	14.48	14.323	16.481	13.878	15.529	15.297	15.062	16.847	18.874	17.303	14.143	14.107	14.599	14.488	15.04	11.728	11.849	12.488	12.127	11.953	14.535	13.698	15.467	10.634	13.778	15.068	13.8	16.266	17.08	15.694	20.972	20.425	20.822	19.692	20.807	18.347	18.548
gene10686	vapb.S	30.293	25.159	40.044	30.943	40.701	50.387	29.364	32.232	72.665	74.463	36.257	32.226	35.709	33.87	56.956	58.94	65.222	60.034	62.37	68.157	48.561	37.912	38.758	36.265	33.356	36.249	37.32	36.372	40.402	34.348	38.961	45.209	42.752	41.745	41.085	45.473	42.126	42.979	34.649	28.324	35.831	41.338	39.825	43.876	46.563	43.386	47.602	44.54
gene10687	tmcc1.S	20.969	21.467	23.635	22.899	23.343	18.611	16.116	16.582	32.297	34.835	16.793	17.416	15.827	17.754	24.643	23.744	27.056	22.215	25.318	28.279	20.298	19.976	18.294	19.094	18.865	18.986	21.124	23.228	21.396	21.691	21.053	21.691	23.316	26.079	21.071	24.552	25.779	21.925	19.412	16.457	24.585	28.334	31.843	30.371	32.909	28.608	31.399	31.219
gene10688	ndrg1.S	0.042	0	0	0	0.145	0	0	0	0.093	0.278	0	0	0	0	0.115	0	0.041	0	0.051	0.062	0.219	0	0	0	0.111	0.223	0.081	0.379	0	0.383	0	0.125	0.431	0.261	0.075	0	0	0	0	0.082	0	0	0	0	0	0	0.213	0.148
gene10689	tex261.S	61.844	65.419	59.907	59.703	66.726	73.145	67.781	68.945	44.365	46.423	67.551	65.934	65.249	66.902	61.073	61.488	77.121	65.778	58.741	80.037	79.15	72.465	76.477	67.913	80.413	76.992	55.636	66.091	62.405	57.934	62.32	51.591	55.51	53.744	59.676	66.369	66.706	61.065	59.587	70.581	71.966	78.645	80.108	80.228	77.531	78.763	85.586	80.406
gene1069	<NA>	2.524	2.235	1.566	3.604	1.467	2.109	1.323	1.387	2.054	2.722	0.726	1.104	1.357	0.946	2.379	1.513	2.049	2.201	1.938	1.191	0	0	0	0	0	0	0	0	0.061	0	0	0.057	0	0	0	0	0	0	0.968	1.361	1.476	2.636	3.497	3.586	3.795	3.378	3.975	3.196
gene10690	usp28.L	17.429	18.056	25.169	23.542	14.417	15.594	18.762	16.201	3.266	1.961	18.513	18.505	20.036	18.23	12.688	11.916	12.46	14.524	23.781	20.592	13.96	13.259	13.426	10.803	12.722	10.62	13.713	13.137	13.057	10.262	8.125	10.112	8.002	9.557	9.083	16.197	17.361	18.715	19.188	17.893	13.11	16.538	17.471	17.453	16.796	16.831	16.328	16.319
gene10691	lrp3.L	13.066	15.117	16.29	10.408	10.247	7.818	11.485	12.148	3.172	3.038	11.29	10.451	13.091	13.236	8.765	9.717	10.896	9.865	9.463	9.247	8.584	7.206	7.096	7.522	9.163	8.064	6.088	6.581	4.714	5.692	6.846	5.097	5.494	5.735	4.468	5.369	6.789	6.458	12.442	10.296	11.092	7.062	4.833	6.621	4.918	7.513	6.104	5.499
gene10692	safb.S	58.972	59.133	36.456	40.625	55.569	71.736	58.049	66.376	109.679	121.143	66.14	69.263	64.014	79.591	65.911	61.194	64.259	67.911	52.959	67.067	56.146	61.647	62.472	58.033	64.787	64.528	64.3	68.884	67.423	66.758	69.931	65.215	65.463	70.568	77.436	62.075	58.529	63.546	46.205	74.835	63.145	67.589	66.706	66.992	68.952	70.909	66.623	63.67
gene10693	slc22a7.L	0.42	0.548	0.874	0.531	0.916	0	0.364	0.556	0	0.117	0.499	0.718	0.224	0.764	0.291	0.52	0.768	0.48	1.169	0.623	0.553	0.864	0.52	0.415	0.49	0.376	0.305	0.479	0.167	0.403	0.487	0.315	0.311	0.165	0.474	0.679	0.738	0.552	1.023	0.52	0.507	0.272	0.651	0.985	0.301	0.464	0.627	0.187
gene10694	iah1.L	10.355	10.774	11.328	12.047	13.042	11.899	6.192	6.229	8.367	6.469	6.217	7.087	5.986	5.859	7.821	7.23	7.908	8.409	9.088	9.714	11.878	10.688	11.395	12.732	10.257	9.428	5.508	4.955	4.778	5.588	6.022	4.549	6.624	5.259	4.964	5.97	5.669	6.666	7.279	5.752	6.292	5.838	4.755	4.735	4.574	4.941	3.921	6.535
gene10695	<NA>	0	0	0.13	0.342	0	0	0	0.102	0.607	0.377	0	0.052	0	0.049	0	0.042	0	0	0	0.05	0.178	0	0.067	0	0	0	0	0	0	0	0.052	0	0.05	0	0	0	0	0.102	0	0.067	0.065	0	0	0	0	0	0	0
gene10696	<NA>	0	0	4.168	4.111	0	0	0.564	0.615	0	0.453	0.644	1.237	1.444	0.296	0	0	0	0	0	0	0	0	0	0	0	0	0	0	0	0	0	0	0	0	0	0	0	0	0.396	1.611	0	0	0	0	0	0	0	0
gene10697	<NA>	0.322	0.403	0.11	0.289	0.075	0.074	0.267	0.746	36.124	33.379	1.12	0.554	0.061	0	0.623	0.265	0.125	0.314	0.425	0.477	0.565	0.353	0.34	0.423	0.343	0.307	0.291	0.424	0.273	0.362	0.066	0.257	0.127	0.235	0.039	0.062	0.038	0.129	0.167	0.127	0.207	0.111	0.166	0.161	0.205	0.063	0.256	0.153
gene10698	pcnp.S	26.815	27.736	30.004	39.661	39.424	49.33	38.943	41.965	40.63	37.982	41.837	39.633	40.78	43.212	34.746	37.31	42.288	39.658	35.232	48.314	24.664	32.962	33.584	35.573	31.066	32.679	42.146	41.309	48.771	43.339	45.318	39.094	37.917	42.586	46.473	42.329	43.291	45.649	41.433	45.899	38.757	39.166	44.168	45.774	44.518	43.198	37.087	51.317
gene10699	<NA>	0	0	0	0	0	0	0	0	0.154	0	0	0	0	0	0	0	0	0	0	0	0	0	0	0	0	0	0	0	0	0	0	0	0	0	0	0	0	0	0	0	0	0	0	0	0	0	0	0
gene107	<NA>	0.082	0.043	0	0	0	0	0	0	0	0.274	0	0.062	0	0	0	0	0	0	0.051	0	0	0	0	0	0	0	0.08	0.125	0	0	0	0.062	0	0	0	0	0	0	0	0	0	0	0	0	0	0	0	0
gene1070	prph2.S	0.09	0.141	0.23	0	0	0.31	0.062	0.068	0.101	0.15	0.107	0.102	0.032	0.065	0.249	0.167	0.131	0.164	0.306	0.167	0.512	0.37	0.178	0.576	0.329	0.321	0.74	1.127	1.108	0.517	0.833	1.111	0.998	0.845	0.731	1.324	0.908	0.641	0	0	0.043	0.077	0.139	0.126	0.343	0.232	0.191	0.28
gene10700	<NA>	0.057	0.02	0.024	0	0.133	0.527	0.238	0.173	0.043	0.128	0.121	0.261	0.027	0.056	0.264	0.213	0.13	0.07	0.189	0.057	0.369	0.35	0.417	0.528	0.535	0.684	0.481	0.233	0.395	0.851	0.384	0.745	0.34	0.3	0.035	0.027	0	0.029	0.037	0.189	0.369	0.099	0.03	0	0.146	0.028	0	0.034
gene10701	suv39h1.L	209.476	222.091	224.377	210.172	163.499	156.737	135.009	119.426	21.246	25.465	123.213	127.483	129.952	121.483	122.866	123.944	154.861	129.219	173.589	232.23	202.024	210.991	206.123	181.582	193.924	196.241	136.056	126.841	133.584	123.316	119.498	124.53	114.938	129.997	130.219	193.56	196.472	205.48	145.33	138.099	115.813	225.146	218.961	218.538	210.701	221.827	213.006	205.686
gene10702	<NA>	0	0	0	0	0	0	0	0	0	0	0	0	0	0	0.086	0	0	0	0	0	0	0	0	0	0	0	0	0	0	0	0	0.093	0	0	0.112	0	0	0	0	0	0	0	0	0	0	0	0	0
gene10703	rala.L	34.818	32.05	23.406	27.949	35.124	49.743	26.003	30.011	6.421	7.794	27.968	27.532	27.287	33.999	24.603	24.658	24.7	27.776	28.515	35.178	35.212	38.369	42.025	40.7	42.289	37.588	31.361	34.557	33.175	31.312	34.133	29.885	29.857	29.529	33.035	38.016	32.754	37.3	21.913	30.229	27.103	29.241	31.77	31.249	33.17	30.181	30.934	30.858
gene10704	rab18.L	32.443	33.028	23.007	20.978	21.322	25.62	13.935	12.978	15.11	16.353	11.311	11.652	13.55	14.533	20.273	19.164	18.294	20.149	21.932	22.451	26.547	27.309	25.721	27.738	27.402	25.146	19.962	23.93	21.226	21.264	18.761	21.61	20.821	20.662	20.493	21.528	26.173	21.283	10.267	13.039	13.572	16.801	16.596	16.184	20.054	20.001	18.791	21.528
gene10705	parp6.S	0.301	0.539	0.331	1.16	0.15	0.594	0.298	0.195	0.193	0.192	0.341	0.196	0.122	0.313	0.655	0.266	0.545	0.354	0.106	0.383	0.906	0.472	0.512	0.51	0.172	0.308	0.083	0	0.137	0	0.532	0.129	0.255	0.81	0.078	0.371	0.151	0.258	0.587	0.17	0.249	0.52	0.667	0.485	0.575	0.317	0.954	0.306
gene10706	cebpb.S	6.834	7.474	6.234	5.942	19.159	13.864	7.331	8.348	2.707	2.982	9.928	6.953	5.057	5.043	7.956	8.084	4.587	5.257	6.831	8.58	9.917	8.903	8.096	9.737	7.272	8.535	4.369	4.722	4.473	4.814	4.545	3.919	5.663	5.687	4.37	3.429	5.111	3.14	8.211	7.113	11.864	6.874	6.284	5.764	6.552	7.751	6.24	5.989
gene10707	slc35a3.1.L	0	0	0	0	0	0	0.059	0	0	0	0	0	0	0	0	0	0	0	0	0	0	0	0	0	0.057	0	0	0	0	0	0	0	0	0.067	0	0	0	0	0	0	0	0	0	0	0	0	0	0
gene10708	naca.L	31.542	28.69	30.584	37.72	24.136	26.636	38.72	39.894	38.331	38.623	39.276	39.463	41.716	44.749	35.744	35.398	35.898	41.519	38.786	32.038	31.184	30.606	31.955	31.439	31.292	30.741	39.83	36.59	35.653	37.34	37.474	35.746	37.741	35.858	36.073	33.488	34.296	35.96	35.578	39.253	36.052	31.094	33.128	29.336	31.475	33.44	31.215	33.744
gene10709	idh3a.S	113.7	114.098	101.812	111.976	74.493	81.714	82.013	85.609	25.829	25.814	77.022	88.412	81.895	88.191	61.018	61.274	56.765	71.167	66.697	71.933	53.458	64.638	58.2	47.113	49.979	45.36	58.81	65.024	55.373	53.867	53.677	49.385	62.871	55.813	58.191	61.108	56.154	65.299	77.746	92.904	73.745	54.465	55.774	53.825	53.598	50.348	50.383	48.515
gene1071	XB5902317.L [provisional:ces1c]	0.088	0.055	0.09	0.238	0.062	0.365	0.171	0	0	0.118	0.195	0.054	0.125	0.205	0	0.087	0.086	0.097	0.131	0.157	0.093	0.097	0.21	0.139	0.118	0.189	0.034	0.027	0.056	0.027	0.109	0.212	0.157	0.111	0.064	0.203	0.124	0.026	0.103	0.035	0.136	0.122	0.137	0.099	0.135	0.026	0.09	0.251
gene10710	nudt21.L	134.96	140.302	147.615	156.027	142.655	142.232	158.545	182.128	156.406	161.253	167.298	178.891	173.473	180.602	153.059	155.331	167.745	171.783	165.855	143.439	143.248	145.4	132.425	130.262	139.207	136.014	145.405	145.021	153.452	157.573	158.553	160.635	144.152	160.303	152.578	139.778	142.4	149.467	174.572	176.827	159.259	158.398	158.819	155.576	155.764	161.81	165.618	165.668
gene10711	polr2g.L	99.001	94.68	86.125	95.638	49.875	33.91	76.262	83.798	90.285	83.469	77.349	81.481	70.047	71.821	49.109	51.341	52.792	50.507	53.372	59.551	97.24	98.036	104.276	93.046	107.463	98.195	73.194	76.561	75.04	89.119	88.766	88.833	86.698	82.924	89.645	88.725	85.414	103.045	73.403	92.227	85.431	68.277	75.237	65.243	68.308	73.35	69.684	63.324
gene10712	vcp.S	78.143	80.389	99.453	81.686	51.013	39.659	73.443	72.7	61.295	57.421	73.329	73.996	80.724	81.595	90.581	106.269	116.785	97.185	102.722	130.523	58.106	49.867	56.274	55.199	50.117	56.376	73.827	63.124	65.883	64.657	74.488	66.42	84.168	73.76	72.78	93.783	95.043	74.101	105.011	75.957	97.884	120.826	126.873	130.555	129.182	122.178	127.36	128.228
gene10713	<NA>	0	0.089	0.545	0	0	0.88	0.236	0.129	0	0	0	0	0	0.248	0.118	0.316	0	0.078	0	0	0.298	0.156	0.337	0	0.34	0.152	0	0	0	0	0	0	0	0	0	0.122	0	0	0.166	0.168	0	0.293	0.132	0.479	0	0.501	0	0
gene10714	wwp1.L	29.938	30.803	24.588	28.694	28.822	27.47	17.926	16.596	17.097	18.308	17.891	17.183	15.308	18.32	21.988	21.768	23.863	25.853	27.445	30.58	38.746	39.551	38.712	33.047	37.118	41.685	11.112	10.119	9.649	9.354	9.876	9.973	11.214	10.534	10.719	11.402	13.188	11.957	14.491	15.5	14.113	29.612	31.763	33.513	30.851	28.147	31.85	28.222
gene10715	itfg2.L	11.178	10.209	12.516	12.683	12.849	8.904	15.295	14.329	7.106	8.854	15.87	15.628	12.798	15.339	14.811	13.086	15.262	11.566	13.453	15.129	13.51	11.994	13.168	14.697	14.097	12.264	14.595	12.68	14.278	14.481	12.949	14.464	15.859	15.129	17.359	15.879	15.69	15.566	14.672	12.226	14.383	20.213	17.39	20.327	21.009	19.139	18.038	18.371
gene10716	<NA>	11.142	11.23	9.977	8.683	10.383	9.872	7.534	8.759	2.982	3.689	8.586	8.763	10.48	8.312	10.76	9.253	13.133	10.386	10.568	12.779	8.922	9.197	8.087	8.835	8.363	9.327	6.89	5.861	7.35	6.283	6.7	6.287	7.597	6.664	6.605	7.557	7.967	5.977	10.845	7.626	9.357	10.529	12.787	13.876	13.337	13.107	11.522	12.604
gene10717	socs4.S	0.256	0.237	0.254	0.382	0.694	1.175	2.91	2.06	1.462	1.327	2.202	1.597	1.371	2.232	2.16	1.616	1.052	1.142	1.862	1.222	1.843	2.752	1.294	2.353	1.551	1.93	3.411	2.894	2.621	3.137	3.028	3.022	4.879	3.829	3.233	4.531	5.289	4.775	1.936	1.405	1.7	3.819	3.215	3.676	2.711	4.141	3.437	4.193
gene10718	eif4enif1.S	116.046	122.158	137.14	126.194	121.369	110.88	121.832	112.74	93.369	94.929	125.629	109.902	136.978	126.567	134.089	135.558	155.991	138.716	143.202	161.142	111.146	102.764	101.294	89.786	93.34	103.705	110.104	106.609	99.5	110.575	112.56	112.417	123.768	128.848	121.397	135.63	149.326	127.068	134.176	111.641	137.193	157.246	157.842	162.402	160.865	159.735	163.059	163.25
gene10719	<NA>	0.282	0	0.257	0.542	0.842	0.971	0.557	0.486	0.99	1.342	0.254	0.733	0.285	0.176	0.834	0.696	0.353	0.257	1.044	1.491	0.776	0.294	0.398	1.269	0.804	0.647	0.701	0.489	0.64	0.802	0.683	0.723	0.953	0.567	0.726	0.867	1.13	0.302	0.626	0.557	0.854	1.664	1.621	1.131	0.844	0.592	1.508	1.287
gene1072	dsn1.L	47.5	45.848	48.746	44.035	53.699	45.105	43.488	39.057	23.751	26.883	38.891	37.192	38.324	38.071	36.759	35.141	33.784	36.435	46.837	39.342	41.822	34.281	37.573	35.752	39.746	33.633	34.29	33.467	32.929	28.367	30.11	30.309	28.937	35.736	28.279	35.257	41.618	46.124	36.927	37.1	36.61	42.017	35.588	38.823	37.002	42.008	37.606	36.346
gene10720	apoc1.L	0.107	0	0	0	0	0	0.148	0.161	8.609	10.222	0.507	0.162	0	0	0.148	0.396	0	0.683	1.453	0.792	0	0	0	0	0	0.191	0.414	0	0	0	0	0	0	0	0	0	0	0	0	0	0.206	0	0	0	0	0	0	0
gene10721	mrps12.S	16.418	19.9	24.262	29.768	22.167	17.893	12.608	12.002	6.4	7.422	11.726	11.021	9.394	13.331	9.592	7.988	10.732	11.612	12.244	13.113	17.92	19.551	21.506	20.577	21.512	20.549	13.23	13.123	13.141	14.458	15.215	12.934	12.153	11.121	13.487	16.817	15.44	16.212	11.547	11.313	10.733	15.334	16.909	14.997	15.464	18.715	15.523	17.894
gene10722	fnip2.S	16.42	16.225	19.12	19.657	17.84	19.019	19.422	17.251	18.195	19.274	18.695	17.238	21.401	19.043	16.996	18.472	17.623	18.252	20.408	17.202	22.9	19.877	20.003	18.796	17.07	18.54	12.665	13.104	13.031	13.409	12.586	14.108	15.325	14.071	12.601	14.585	16.814	14.51	16.255	12.174	16.031	18.021	14.933	17.15	16.786	16.374	16.642	15.998
gene10723	c1qbp.L	124.469	123.084	109.156	101.279	86.098	91.713	111.182	115.438	60.115	56.267	104.838	113.54	122.161	119.671	107.569	118.501	121.17	119.052	120.776	157.386	92.208	99.786	100.21	94.442	103.497	93.261	125.161	118.004	121.394	110.498	120.443	115.915	117.121	117.825	122.556	127.833	131.739	125.255	107.314	114.547	107.911	128.973	150.326	133.307	141.656	138.439	145.808	147.813
gene10724	phf3.L	56.457	55.605	50.008	51.638	49.135	73.012	55.677	54.815	38.507	40.407	55.773	56.163	60.783	61.523	44.029	44.35	37.815	46.836	48.582	36.95	54.97	51.03	52.634	52.736	50.166	50.61	37.654	40.628	39.944	40.863	36.111	42.069	39.214	41.378	39.22	38.781	39.337	39.065	44.698	43.732	52.532	37.9	37.161	37.495	33.434	34.069	35.967	37.001
gene10725	pou3f4.S	0.038	0	0	0	0	0.13	0.052	0	0.084	0.084	0	0.172	0	0	0.052	0.047	0.037	0.034	0.42	0.168	0	0	0	0.149	0.1	0.067	0.073	0.057	0.06	0.058	0.058	0.113	0	0.059	0	0	0.066	0	0.073	0.224	0.218	0.26	0.175	0.141	0.216	0	0	0
gene10726	mxd3.L	67.635	67.125	73.187	76.901	74.772	70.963	67.235	70.506	10.726	10.27	66.365	68.562	74.358	76.841	65.985	67.288	68.668	81.026	75.365	61.955	73.515	75.291	79.102	77.135	78.088	73.767	77.047	82.115	85.781	80.008	78.85	84.547	81.366	82.488	85.982	83.955	82.889	86.221	71.042	69.152	65.44	70.493	69.275	68.82	64.313	70.01	71.105	71.848
gene10727	<NA>	0	0	0	0	0	0	0	0	0	0	0	0	0	0	0	0	0	0	0	0	0	0	0	0	0	0.091	0	0.077	0	0	0.079	0	0	0.08	0	0	0	0	0	0	0	0	0	0.095	0.097	0	0.173	0
gene10728	opn6a.L	0	0.079	0.097	0.51	0.264	0	0	0	0	0	0	0	0	0	0	0	0	0	0	0	0	0.138	0	0	0	0	0	0	0	0	0	0	0	0	0	0.218	0	0	0	0	0	0	0	0	0	0.446	0.129	0
gene10729	sh3rf1.S	23.769	27.035	31.546	24.82	28.698	25.108	21.172	22.421	9.615	11.727	20.29	21.338	24.258	22.39	23.467	26.633	28.351	24.806	27.653	31.311	18.485	19.269	18.531	16.167	16.071	18.743	17.526	19.27	18.273	17.48	19.58	19.815	19.264	20.916	20.968	22.068	27.401	23.503	23.611	19.045	23.114	26.941	26.685	27.087	26.81	26.292	24.198	20.808
gene1073	ppp3r1.S	57.409	53.149	67.899	75.977	67.425	67.313	71.644	66.349	17.854	18.037	70.993	65.917	73.547	78.336	63.049	65.677	67.492	69.872	68.409	79.732	65.505	69.47	60.906	63.073	62.027	68.315	58.412	68.039	66.447	64.569	59.616	58.216	65.592	64.551	58.46	73.073	78.95	70.084	63.015	62.224	65.104	73.448	66.958	76.515	69.202	63.704	71.85	70.826
gene10730	rspry1.L	63.2	63.582	57.362	64.795	50.816	56.435	49.025	43.901	1.612	1.246	43.107	49.243	51.343	49.906	44.215	42.206	46.127	52.51	55.867	57.622	35.786	39.426	44.953	34.102	37.152	33.062	39.994	41.008	39.98	38.182	32.147	33.222	31.82	33.933	37.444	51.758	53.141	49.189	44.413	46.072	36.231	50.216	48.448	50.964	45.067	49.678	42.218	45.124
gene10731	glcci1.S	17.544	16.903	25.589	22.091	19.898	20.619	18.805	18.86	10.295	11.53	20.906	17.377	22.631	19.769	18.828	20.323	19.272	16.7	21.917	21.191	21.67	23.093	20.899	20.809	18.626	20.565	16.155	15.805	12.684	14.347	14.686	17.14	16.256	17.928	13.405	17.804	18.422	15.648	22.092	12.557	19.18	22.359	20.678	23.639	22.945	23.211	23.833	25.416
gene10732	il1b.L	0	0	0	0	0	0	0	0	0	0	0	0	0	0	0	0	0	0.1	0	0	0	0	0	0	0	0	0	0	0	0	0	0	0	0	0	0	0	0	0	0	0	0	0	0	0	0	0	0
gene10733	fam3b.S	0	0	0.896	1.211	0	0	0.026	0.029	0.042	0	0.03	0	0	0	0	0	0	0	0	0	0	0	0.037	0	0	0	0	0	0.03	0.058	0	0	0	0	0	0	0	0	0	0.037	0.037	0	0	0	0	0	0.032	0
gene10734	epas1.S	0	0	0.062	0.055	0	0.056	0.112	0.098	13.205	13.055	0.154	0.074	0	0	4.001	3.095	2.281	5.718	6.21	5.496	0.114	0.059	0.064	0.128	0.043	0	0.157	0.099	0.129	0.125	0.126	0.122	0.096	0.102	0.059	0	0.029	0.098	0.032	0.064	0.063	0.028	0	0	0	0.024	0.028	0.058
gene10735	setbp1.L	4.424	3.996	5.473	4.634	4.291	5.589	2.526	2.486	3.081	3.697	2.744	2.363	2.971	3.011	3.345	3.666	3.174	3.825	4.532	4.566	3.413	3.409	3.615	3.438	3.667	3.496	4.149	3.851	3.602	3.786	3.586	4.101	4.535	4.558	3.369	4.682	5.408	4.462	2.284	1.982	2.972	6.023	5.24	6.615	6.094	5.373	5.692	5.621
gene10736	klf11.L	9.679	8.871	14.376	8.212	10.007	8.412	6.234	4.294	10.38	8.648	5.979	5.213	6.011	6.554	7.266	8.817	7.418	5.952	9.315	9.342	9.213	8.624	8.763	10.365	8.034	11.937	5.504	6.154	5.715	5.223	7.289	7.03	7.582	7.521	7.409	8.167	8.146	5.311	8.821	5.462	8.228	9.889	12.093	13.073	12.076	10.383	12.291	12.301
gene10737	<NA>	0.34	0.236	0.072	0.381	0	0	1.019	0.77	0.887	1.764	0.537	0.86	0.161	0.577	1.175	1.12	0.441	0.362	0.56	0.42	0.496	1.346	0.898	1.229	1.056	1.519	0.439	0.517	0.18	0.695	1.225	0.849	1.425	0.444	0.307	0.081	0.298	0.085	0.882	0.784	0.984	0.488	0.966	0.425	0.108	0.584	0.193	0.604
gene10738	ttc33.L	4.93	4.477	2.082	3.319	3.611	1.87	2.183	2.905	0.441	0.439	2.417	2.471	2.099	2.726	1.772	1.646	1.729	2.432	1.95	2.997	2.42	3.153	2.832	4.473	2.954	3.085	2.291	2.998	3.215	3.024	2.132	2.511	2.628	2.318	3.027	2.904	3.204	3.699	2.975	4.193	2.284	2.549	3.973	2.958	3.199	2.758	1.932	3.331
gene10739	txlna.L	94.724	95.31	83.099	89.739	88.154	100.416	95.685	97.915	65.179	65.084	97.605	98.241	99.182	106.272	88.19	82.03	85.153	98.084	96.137	93.447	94.5	98.557	99.814	96.796	97.482	94.643	91.335	89.55	95.662	94.976	87.226	89.873	93.036	92.031	88.779	92.556	94.16	95.322	86.051	88.928	90.374	92.308	85.737	91.25	86.158	89.13	87.921	86.528
gene1074	oit3.L	2.436	2.747	0	0	0	0	0	0	2.066	2.01	0	0	0	0.029	1.032	0.437	0.497	1.22	1.846	1.369	0	0	0	0	0	0	0	0	0	0	0	0	0	0	0	0	0	0	0	0	0	0	0	0	0	0	0	0
gene10740	<NA>	0.238	0.199	3.047	4.007	0	0.657	0.725	1.079	0	0.106	0.979	0.434	0.405	0.831	1.185	1.06	1.624	1.436	1.472	1.483	1.837	0.87	1.698	1.597	0.951	1.448	1.014	0.941	1.06	0.876	0.883	1.142	0.564	0.672	0.946	1.026	0.669	1.715	1.205	0.377	0.643	0	0.369	0.179	0.909	0.841	0.893	0.169
gene10741	htra2.S	14.41	13.707	12.816	9.115	9.446	7.751	12.377	9.727	12.692	10.458	10.587	12.884	11.819	11.821	14.978	14.719	16.926	13.398	12.761	18.032	8.511	9.525	13.159	9.473	10.344	8.588	11.578	10.797	10.241	11.991	10.971	11.101	12.331	11.611	10.428	13.803	13.641	11.425	13.927	12.835	13.315	17.437	22.017	22.423	22.82	20.013	18.373	20.082
gene10742	rnf38.L	85.799	84.476	106.315	83.732	109.427	111.608	88.764	85.448	119.366	124.265	93.842	79.968	106.732	86.214	79.335	83.637	88.95	78.149	91.613	82.587	78.904	71.535	73.92	74.364	67.726	70.825	72.672	72.222	75.545	79.335	78.176	75.129	94.541	89.746	77.812	90.132	107.869	85.91	105.071	75.724	98.715	87.531	93.441	94.276	104.236	91.978	91.311	99.711
gene10743	<NA>	19.708	19.68	23.591	22.687	4.108	4.106	23.343	21.82	12.782	10.719	21.664	21.094	22.434	25.307	17.723	17.838	20.874	19.44	18.994	19.567	15.472	14.842	12.763	13.428	13.321	16.748	16.592	15.185	13.09	14.013	11.813	15.535	14.849	15.145	14.203	16.648	18.59	15.924	18.709	16.679	18.444	20.411	20.475	18.708	17.592	19.172	18.476	18.149
gene10744	<NA>	27.093	27.888	25.523	25.603	32.102	35.149	33.875	30.808	21.399	22.712	30.294	32.218	37.159	33.581	21.314	21.262	22.723	23.924	24.766	23.965	32.043	33.298	30.422	31.085	26.907	31.086	23.866	24.636	25.435	26.356	21.968	26.803	25.164	26.186	25.244	26.448	27.402	25.592	29.899	26.678	29.893	21.487	20.75	23.462	23.849	22.952	22.152	22.785
gene10745	perp.S	114.184	113.523	109.329	114.312	96.11	112.99	134.163	136.071	110.75	119.207	141.498	147.139	147.773	144.979	94.464	97.289	83.814	108.423	95.581	96.306	117.235	105.786	119.372	120.549	110.703	111.885	123.866	134.296	122.34	125.566	136.153	133.454	143.412	136.998	129.124	120.674	125.101	125.033	136.355	147.288	147.431	85.18	94.322	84.138	91.552	88.631	86.139	79.432
gene10746	<NA>	0.429	0.168	0.32	0.421	0.187	0.308	0.223	0.216	0	0.08	0.226	0.353	0.254	0.39	0.247	0.088	0.07	0.229	0.155	0.08	0.408	0.359	0.39	0.141	0.381	0.192	0.346	0.462	0.37	0.466	0.608	0.348	0.609	0.28	0.484	0.334	0.817	0.751	0.278	0.071	0.414	0.277	0.028	0.369	0.034	0.316	0.091	0.032
gene10747	gns.L	25.521	24.295	25.066	23.772	18.204	18.712	17.432	15.954	11.484	11.764	20.249	16.594	22.513	19.464	20.228	21.57	21.218	21.504	24.39	20.144	24.978	26.197	22.502	21.821	21.453	20.778	22.335	26.154	24.184	21.612	21.093	22.415	23.359	23.227	21.899	25.871	32.599	26.078	17.746	17.548	17.896	19.427	19.494	20.618	18.393	18.493	20.099	18.159
gene10748	slc36a1.S	9.211	10.194	9.111	8.73	6.739	4.836	7.143	8.358	7.937	8.243	8.372	6.915	8.413	7.779	9.149	9.096	8.999	9.165	9.293	8.084	6.682	7.014	8.336	7.36	6.204	7.951	7.483	8.852	8.209	8.647	9.362	9.478	8.817	9.042	8.079	9.736	11.203	9.175	8.605	6.701	7.459	9.169	9.968	9.927	9.395	9.041	11.952	9.084
gene10749	fgfr4.S	77.645	79.051	77.361	82.156	94.239	89.34	80.758	76.739	189.758	193.395	76.84	75.627	59.739	59.403	66.203	62.419	62.936	62.382	79.374	84.927	78.144	84.576	78.358	80.854	82.205	82.268	65.466	71.162	64.356	65.234	61.72	66.532	63.91	70.899	65.343	80.045	83.978	78.024	64.575	62.498	67.12	80.159	83.025	84.34	86.022	88.275	89.744	86.873
gene1075	cop1.S	83.678	90.286	84.233	83.272	81.57	74.78	72.552	66.34	27.809	26.89	69.504	71.329	86.302	72.434	72.424	72.112	76.602	76.551	72.77	75.377	74.604	64.211	66.763	61.2	64.746	67.939	62.425	60.909	56.545	59.663	56.189	64.378	63.891	63.795	66.584	63.471	66.6	64.759	72.945	68.3	78.135	86.512	82.88	82.202	83.08	82.671	80.856	79.154
gene10750	tmed10.S	44.095	41.459	31.522	34.602	31.435	29.229	37.42	40.142	40.708	40.17	37.006	40.713	37.04	40.018	28.936	27.069	29.591	31.136	33.716	32.367	35.229	36.052	40.068	38.117	40.096	37.122	35.552	36.838	38.014	39.983	37.328	39.809	35.778	36.355	37.255	37.602	34.529	39.118	33.66	38.555	32.986	27.497	27.729	26.478	28.984	24.966	28.497	25.523
gene10751	<NA>	0	0	0	0.042	0	0	0.034	0.019	0	0.027	0.02	0	0.018	0.018	0	0.03	0	0	0.092	0.238	0	0.023	0.024	0	0.033	0.022	0.024	0	0.098	0.076	0.019	0.074	0.055	0.039	0	0.018	0.022	0.019	0.048	0	0.048	0.085	0.076	0.069	0.141	0.163	0	0.132
gene10752	mitf.S	0.308	0.312	0.622	1.415	2.574	3.543	0.052	0.127	0	0.062	0.266	0.184	0.106	0.163	0.581	0.612	0.428	0.427	0.497	0.291	0.098	0.137	0.037	0.24	0.1	0.067	0.072	0.085	0.208	0.143	0.101	0.098	0.041	0.117	0.067	0.054	0.049	0.168	0.145	0.111	0.144	0.129	0.232	0.28	0.125	0.22	0.159	0.116
gene10753	<NA>	0	0	0	0	0	0	0	0	0	0	0	0	0	0	0	0	0	0	0	0	0	0	0	0	0	0	0	0	0	0	0	0	0	0	0	0	0	0	0	0	0	0	0	0	0	0	0	0
gene10754	wipi2.L	60.877	62.783	67.412	68.671	56.195	56.887	69.517	77.823	51.146	52.703	69.034	73.414	73.41	77.865	64.281	60.232	59.034	66.566	65.682	62.074	66.948	63.675	63.606	69.377	61.917	60.503	64.017	65.506	68.986	77.121	61.997	70.16	69.326	66.744	68.262	63.119	67.946	64.161	70.107	71.778	74.672	62.16	64.369	60.32	50.641	56.471	58.517	54.622
gene10755	cul5.L	35.343	35.223	30.011	26.093	32.04	35.261	27.05	25.246	20.337	18.187	27.355	27.509	33.465	29.621	24.319	27.262	25.577	27.438	29.237	30.089	28.668	25.776	26.197	26.212	24.9	26.325	26.746	26.293	25.18	25.029	24.1	24.939	27.102	26.902	21.179	28.269	30.32	28.448	27.965	25.319	29.486	28.967	27.161	27.549	25.55	29.543	29.641	27.977
gene10756	palm2akap2.L	0.35	0.366	0.341	0.393	0.524	0.287	3.162	4.611	33.923	35.021	3.93	3.496	0.899	0.728	1.199	1.051	0.179	0.32	0.577	0.371	0.789	0.945	1.057	0.46	0.644	0.447	1.905	1.648	2.228	0.358	0.489	0.55	0.198	0.157	0.361	0.024	0.205	0.1	2.045	3.101	1.32	0.517	0.465	0.5	0.382	0.344	0.341	0.356
gene10757	iars1.L	28.494	31.15	32.487	39.163	11.933	16.76	35.979	34.242	14.555	14.619	34.99	33.092	33.566	37.396	33.171	34.445	33.437	34.997	37.648	35.74	15.428	15.795	16.763	16.69	14.297	16.62	28.461	28.807	29.463	28.306	27.151	27.618	31.021	27.829	28.332	31.337	36.761	29.821	31.81	25.685	32.015	29.169	27.244	32.288	26.029	28.2	27.537	27.376
gene10758	ndufa9.L	69.545	69.545	72.124	78.912	39.735	36.533	65.726	68.645	38.831	33.444	57.716	61.267	63.345	62.348	55.492	53.875	58.394	62.083	70.748	66.58	47.143	47.327	45.263	50.161	47.189	47.132	50.534	47.32	47.407	52.822	51.253	49.12	49.713	45.358	55.263	57.004	57.695	57.246	69.11	72.702	66.218	59.012	61.078	62.971	63.326	66.019	59.704	63.128
gene10759	<NA>	0.269	0.194	0.053	0	0.072	0.071	0.029	0	0	0	0.033	0.031	0	0.03	0.258	0.281	0.262	0.17	0.256	0.276	0	0	0	0	0.028	0.037	0	0	0.033	0.095	0	0	0.031	0	0	0	0	0	0	0	0.04	0.071	0.064	0	0	0.03	0	0
gene1076	snx8.L	43.675	43.823	52.13	48.119	47.974	55.458	41.411	40.314	12.824	14.761	40.483	41.935	44.798	45.143	34.529	34.776	33.067	36.833	45.469	39.265	45.265	47.92	45.487	46.916	47.131	47.027	35.085	40.195	37.197	38.982	34.786	35.731	32.776	35.072	35.698	45.217	43.084	41.669	40.672	37.901	40.44	45.293	43.631	44.835	41.406	43.521	46.669	42.944
gene10760	<NA>	4.546	3.796	0.776	0.68	4.228	4.701	1.258	0.687	0.452	0.562	0.959	1.074	0.717	1.102	0.908	0.812	0.64	0.6	1.374	0.899	11.865	14.123	11.405	12.751	12.242	9.934	1.076	1.305	2.33	1.472	1.482	1.059	1.346	1.741	1.642	1.742	2.218	1.667	0.688	0.599	1.95	1.132	1.018	0.379	0	0.446	0.689	0.269
gene10761	dtx3.L	0.107	0.056	0.137	0.181	0.374	0.37	0.074	0.162	0.18	0.06	0.085	0.122	0.152	0.039	0.148	0.033	0.078	0.074	0.133	0.04	0	0.196	0.053	0.106	0.214	0.48	0.156	0.122	0.341	0.082	0.207	0.121	0.04	0.084	0.291	0	0.236	0.161	0.209	0.106	0.155	0.37	0.249	0.151	0	0	0.091	0.286
gene10762	cryga.7.L	0	0	0.213	0	0	0	0	0	0	0	0	0.253	0	0	0	0	0	0	0	0	0	0	0	0	0	0	0	0	0	0	0	0	0	0	0	0	0	0	0	0	0	0	0	0	0	0	0	0
gene10763	qdpr.S	13.82	17.735	26.816	24.781	24.497	26.946	10.347	9.07	3.295	2.772	6.987	11.872	10.93	10.383	11.433	10.643	12.911	13.35	16.946	21.498	13.107	13.663	14.809	17.649	14.935	19.849	18.207	18.252	16.216	19.979	17.322	14.426	15.093	18.107	15.753	24.577	23.077	23.627	13.231	15.235	12.681	18.351	20.014	14.87	22.699	19.68	18.917	20.949
gene10764	ei24.S	37.222	35.985	38.564	36.203	34.608	42.582	41.146	40.881	7.802	9.984	39.333	40.17	44.317	47.518	30.334	30.882	30.154	37.005	36.296	27.085	41.293	42.265	43.937	42.101	41.543	42.478	28.624	32.082	30.561	34.304	29.333	33.927	31.108	30.662	28.102	28.939	31.236	32.282	35.671	37.781	39.41	33.656	29.894	31.579	29.978	32.904	31.413	31.066
gene10765	<NA>	43.592	44.877	42.634	37.509	39.226	43.223	36.492	33.806	21.074	21.434	34.677	33.415	39.329	37.518	43.616	43.125	43.626	43.55	48.529	41.739	36.812	35.165	34.896	31.825	30.804	31.732	29.337	27.375	29.128	27.108	22.01	25.981	25.651	27.22	22.512	31.984	37.31	31.269	35.51	29.762	36.242	39.588	40.28	40.492	39.186	39.911	40.281	41.029
gene10766	sar1b.L	0.045	0	0	0	0	0	0	0	0	0	0	0	0	0	0	0	0	0	0	0	0	0	0	0.176	0	0	0	0	0	0	0	0	0	0	0	0	0	0	0	0	0	0	0	0	0	0	0	0
gene10767	lsm14b.L	125.639	129.824	198.26	166.782	185.977	152.335	117.222	111.156	60.141	68.353	116.427	106.625	141.187	119.639	119.912	123.482	151.15	128.621	152.439	171.264	114.418	109.386	104.245	110.28	96.483	110.346	98.56	90.854	95.41	81.776	84.228	87.861	97.518	102.818	86.994	130.65	122.22	114.298	151.233	115.813	139.33	191.237	216.456	231.872	247.038	210.534	211.437	233.957
gene10768	kcnq2.S	0.221	0.231	0.51	0.298	0.463	0.254	0.286	0.089	0.033	0.066	0.163	0.112	0.293	0.279	0.265	0.42	0.331	0.337	0.383	0.416	0.336	0.243	0.175	0.146	0.452	0.528	0.229	0.157	0.188	0.272	0.342	0.177	0.109	0.324	0.267	0.191	0.389	0.332	0.23	0.117	0.199	0.407	0.32	0.277	0.394	0.217	0.402	0.289
gene10769	vps16.S	34.249	35.428	42.196	36.938	28.777	23.088	30.168	29.93	30.143	27.642	31.371	29.24	26.883	30.046	39.501	39.191	44.453	40.176	42.783	54.366	32.365	30.853	32.634	31.991	32.012	32.644	33.137	29.573	30.863	26.947	28.082	26.63	33.4	31.165	30.306	35.161	40.427	32.822	33.114	28.002	33.174	45.858	48.503	46.701	47.915	47.727	44.042	47.726
gene1077	rassf8.S	4.813	6.135	6.105	4.731	3.417	2.79	2.535	2.445	1.906	1.706	3.166	2.717	2.72	3.223	4.535	3.844	5.81	4.008	4.266	8.842	4.779	4.671	4.556	6.385	4.311	4.798	4.619	3.497	4.133	2.875	3.092	3.255	3.721	4.472	3.693	4.529	3.74	3.963	4.146	2.612	3.7	6.68	6.206	7.029	8.617	7.839	8.783	8.029
gene10770	ngdn.L	146.311	143.773	127.118	132.62	109.604	109.19	85.716	90.554	41.111	34.58	83.617	96.848	90.241	90.834	87.81	82.111	83.982	90.91	109.662	120.543	86.716	99.51	97.813	89.355	95.32	78.926	70.993	78.98	76.823	76.626	83.719	73.859	94.764	94.188	100.591	123.029	107.746	126.738	88.037	83.03	76.373	120.486	114.154	113.334	118.193	118.725	124.517	120.034
gene10771	tapbp.S	0.045	0.094	0	0	0	0	0	0	0.101	0	0	0	0	0	0	0	0	0.041	0	0	0	0.082	0.089	0.089	0	0	0.087	0	0	0	0	0	0	0	0	0	0	0	0	0	0.087	0	0	0	0.172	0	0.077	0.08
gene10772	lin7b.S	3.088	2.993	3.67	4.084	3.463	1.901	0	0	0.494	0	0	0	0	0	1.373	1.364	1.719	1.31	0.818	2.126	1.74	0.806	0.655	0.435	0.441	0.394	1.068	1.341	1.579	1.184	2.385	1.487	0.816	1.383	0.797	2.219	3.681	1.655	0	0	0	5.513	5.3	3.516	4	3.41	6.015	3.334
gene10773	pstk.L	1.697	1.872	3.226	3.1	2.367	2.507	1.074	1.025	0.868	1.51	1.073	1.694	1.445	1.693	1.139	0.539	1.842	1.373	0.479	1.366	2.38	2.658	2.113	1.625	2.066	1.474	5.351	5.969	7.094	5.428	5.092	5.811	3.804	4.634	5.778	5.155	5.96	6.474	1.227	1.726	1.123	1.754	2.63	1.636	2.313	1.356	2.809	1.81
gene10774	fam3c.L	29.147	30.088	15.375	15.376	34.26	46.147	25.861	26.021	6.44	8.028	25.577	26.993	27.681	31.972	17.244	16.943	13.708	19.784	23.383	20.388	20.103	20.038	23.8	19.732	24.336	19.032	4.777	5.833	4.941	4.344	4.94	5.818	4.058	4.152	4.455	4.792	3.851	5.621	24.458	28.191	29.274	18.974	21.313	20.219	18.571	21.39	15.57	19.66
gene10775	<NA>	0	0	0	0	0	0	0	0	0	0	0	0	0	0	0	0	0	0	0	0	0	0	0	0	0	0	0	0.156	0	0	0	0	0	0	0	0	0	0	0	0	0	0	0	0	0	0	0	0
gene10776	epc2.S	26.653	25.205	24.746	22.142	25.72	24.325	16.312	16.546	17.879	19.763	15.905	15.698	16.696	16.512	21.077	20.836	23.08	21.899	27.177	24.96	18.189	16.019	16.732	16.699	14.293	17.449	12.278	11.964	12.298	11.248	10.561	10.72	12.417	12.49	11.235	16.278	15.463	12.974	14.239	13.641	15.958	17.949	16.881	17.928	18.055	17.763	16.833	17.99
gene10777	<NA>	0	0	0	0	0	0	0	0	0	0	0	0	0	0	0	0	0	0	0	0	0	0	0	0	0	0	0	0	0	0	0	0	0	0	0	0	0	0	0	0	0	0	0	0	0	0	0	0
gene10778	<NA>	0	0	0	0	0	0	0	0	0	0	0	0	0	0	0	0.159	0	0	0	0	0	0	0	0	0	0	0	0	0	0	0	0	0	0	0	0	0	0	0	0	0	0	0	0	0	0	0	0
gene10779	fermt2.S	86.513	87.478	89.084	86.005	87.469	86.27	77.588	82.655	57.478	60.319	82.838	81.208	91.535	88.653	87.978	86.619	85.441	91.472	91.799	91.755	88.764	82.899	80.412	81.526	77.549	86.74	85.381	88.195	88.072	91.787	80.208	90.736	85.816	88.266	85.941	87.131	98.314	85.948	69.8	69.29	74.978	69.96	73.916	73.991	73.075	70.374	68.634	74.024
gene1078	anxa1.1.L	23.755	26.591	21.121	21.98	8.511	10.391	20.858	19.625	9.314	9.738	21.224	20.384	20.469	25.06	19.944	23.422	16.64	22.03	21.826	21.919	11.198	11.279	12.936	13.163	11.278	14.371	17.511	17.891	16.323	19.592	18.844	17.849	20.612	15.97	19.053	18.664	16.133	24.122	18.023	18.31	22.578	6.308	6.785	7.402	5.889	7.291	8.805	6.381
gene10780	rapgef5.L	6.745	6.327	0.23	0	0.251	0.434	0.224	0.516	1.207	0.84	0.597	0.355	0.102	0.314	0.423	0.445	0.21	0.246	0.245	0.267	0.536	0.46	0.713	0.851	0.216	0.322	0.488	0.492	0.544	0.579	0.361	0.404	0.24	0.62	0.552	0.31	0.379	0.351	0.14	0.107	0.243	0.372	0.697	0.978	0.858	0.98	0.674	0.384
gene10781	thoc2.S	19.488	19.78	17.281	17.894	21.969	23.949	16.434	15.141	15.338	15.947	16.084	16.489	16.902	16.899	15.649	14.313	14.455	17.11	15.07	15.985	11.951	12.932	14.788	12.934	12.68	13.05	13.345	14.53	14.792	15.456	12.819	14.155	15.385	15.531	14.353	13.548	15.974	15.261	12.802	12.384	14.266	11.844	13.265	14.695	14.212	14.21	13.574	13.209
gene10782	iffo1.S	0	0.054	0.033	0	0.09	0	0	0	0	0	0	0	0	0	0	0	0	0	0.064	0	0.09	0.188	0	0.152	0	0.092	0	0	0	0	0	0	0	0	0	0	0	0.039	0	0	0	0	0	0	0	0	0	0
gene10783	<NA>	0.078	0.054	0	0	0.363	0	0.144	0.197	0.058	0.174	0.082	0.119	0.111	0.076	0.036	0	0	0.048	0	0	0.411	0.713	0.464	0.616	0.52	0.651	0.05	0.079	0.124	0.08	0.161	0.234	0	0.163	0.094	0.112	0.046	0.039	0	0	0.05	0.179	0.04	0.293	0	0.077	0.044	0
gene10784	pank1.L	9.551	8.9	9.166	12.464	2.719	2.52	7.014	6.478	22.353	19.294	7.321	7.253	5.393	7.87	7.68	5.482	6.931	7.88	7.711	7.658	7.261	6.234	6.757	9.514	8.825	6.012	8.21	8.518	10.773	8.968	7.526	9.564	11.47	8.247	9.592	8.402	8.558	8.116	6.83	6.939	6.583	6.886	5.589	6.122	5.394	6.744	6.56	6.759
gene10785	idnk.L	6.475	6.167	6.628	5.72	3.105	5.022	8.737	11.25	3.984	3.241	10.496	8.728	13.093	11.069	6.266	5.403	8.279	4.954	6.504	7.2	2.696	1.923	3.527	2.714	2.048	4.341	4.859	5.782	4.763	5.71	6.376	5.821	4.793	6.849	7.016	5.233	5.686	5.587	10.872	11.205	10.935	3.905	4.265	4.705	4.325	4.647	3.448	5.613
gene10786	elavl3.L	0.098	0.034	0.21	0.11	0	0	0.181	0.149	22	25.952	0.363	0.249	0.093	0.095	0.272	0.162	0	0.09	0.932	0.875	0.057	0.24	0.065	0.065	0.131	0.234	0.063	0.149	0.052	0.452	0.051	0.196	0.243	0	0	0	0.23	0.197	0	0.065	0	0.452	0.356	0.184	0.313	0	0.112	0.175
gene10787	<NA>	0	0.015	0.018	0	0	0	0	0	0	0.031	0	0	0.02	0	0	0	0.014	0	0.191	0	0	0	0	0	0	0	0	0	0.045	0	0	0	0	0	0.025	0.04	0	0.021	0.027	0	0.027	0.024	0.13	0.053	0	0	0.072	0
gene10788	<NA>	0	0	0	0	0	0	0	0	0	0	0	0	0	0	0	0	0	0	0	0	0	0	0	0	0	0	0	0	0	0	0	0	0	0	0	0	0	0	0	0	0	0	0	0	0	0	0	0
gene10789	lgals1.1.S	0.164	0	0	0	0	0	0.227	0.496	1.836	2.19	0	0.498	0	0.716	0	0	0	0	0	0	0.575	0.3	1.3	0.324	0.656	0.293	0.636	0.249	1.044	0.503	0.507	0.246	0	0	0	0	0	0	0.958	0.325	0.317	0	0.509	0.615	0.313	0.483	0	0
gene1079	ppp5c.S	39.317	41.639	39.309	41.463	36.935	37.049	42.807	42.452	32.963	33.001	40.376	43.953	42.922	50.34	49.285	47.049	48.465	56.37	51.849	53.086	37.957	33.436	41.121	42.907	39.724	40.492	40.201	41.358	38.689	41.728	42.591	39.9	40.046	40.172	42.604	41.729	44.652	43.973	41.638	47.486	40.877	57.73	56.143	55.936	51.223	51.945	50.114	55.279
gene10790	sdcbp.S	144.145	149.261	129.791	137.434	106.275	102.095	145.821	147.65	102.207	98.942	150.687	162.109	146.596	173.014	146.219	136.232	141.922	155.051	141.383	153.596	138.384	147.794	153.537	155.566	164.355	155.797	146.13	166.825	159.793	168.754	156.844	151.798	162.557	146.635	161.997	141.485	155.131	158.269	147.456	164.453	151.69	147.125	143.876	137.878	144.445	141.626	146.736	140.364
gene10791	ctse.L	0.143	0.225	0	0.241	0.25	0	0.199	0.108	0.321	0.319	0	0.327	0.305	0	0.198	0.177	0.21	0.197	0	0	0	0.131	0.142	0.424	0.669	0	0.278	0.109	1.027	0.44	0.665	0.537	0.319	0.225	0.13	0	0.126	0	0	0.426	0.415	0	0.222	0.134	0	0.106	0.122	0
gene10792	mier1.S	20.754	20.082	18.424	19.864	22.999	28.843	23.129	24.464	24.769	28.662	25.301	24.168	25.216	27.554	24.091	20.311	21.482	23.938	22.077	23.142	22.248	21.295	28.777	21.532	22.773	25.434	25.831	25.863	25.549	28.515	25.845	24.455	25.38	23.986	24.402	23.39	26.16	24.719	18.855	24.415	23.283	16.579	19.534	20.595	18.277	18.493	17.756	17.107
gene10793	mesp2.S	0	0	0.071	0	0	0	0.077	0	0.125	0.124	0.176	0.254	0	0	0	0.069	0	0	0	0.083	0	0.102	0	0.11	0	0	0.108	0	0	0	0	0.084	0.083	0.087	0	0	0	0	0	0.11	0.323	0	0	0	0.106	0	0	0
gene10794	vat1.S	48.502	48.815	56.241	53.419	43.135	41.129	42.89	42.323	41.998	42.691	43.844	41.586	45.363	50.649	44.491	49.363	54.491	52.25	53.291	66.969	44.359	40.826	43.622	39.833	38.522	40.534	43.337	38.924	35.491	42.133	40.614	38.523	49.383	46.139	39.772	50.57	55.888	45.648	48.381	37.303	50.724	46.386	49.26	52.831	54.799	52.91	52.672	56.447
gene10795	ntn1.S	0.135	0.134	0.154	0.076	0.446	0.337	0.062	0.068	0.286	0.151	0.036	0.046	0.053	0.066	0.073	0.102	0.095	0.124	0.177	0.045	0.277	0.234	0.179	0.223	0.241	0.161	0.131	0.092	0.144	0.104	0.105	0.045	0.145	0.106	0.109	0.173	0.132	0.203	0.059	0.03	0.029	0.117	0.07	0.127	0.057	0.155	0.064	0.054
gene10796	cbx3.S	248.528	257.674	203.684	212.555	232.796	305.304	251.692	284.399	267.384	272.187	271.83	284.834	285.547	298.002	238.43	260.565	256.934	272.817	248.963	279.419	281.955	282.769	309.333	299.075	313.577	303.982	317.836	321.494	332.061	313.363	356.823	322.678	307.263	295.332	328.303	299.347	253.966	313.589	256.087	318.938	286.307	273.084	280.184	284.099	292.956	275.889	285.919	284.33
gene10797	rnls.L	15.176	15.946	14.159	13.325	14.871	14.873	12.926	12.653	4.77	5.307	11.318	13.106	13.684	14.031	14.807	12.173	18.345	15.163	14.496	18.964	14.237	13.079	16.589	13.214	14.127	13.25	19.265	18.749	15.662	16.815	17.404	15.818	18.26	18.851	19.158	24.942	23.801	23.001	15.316	11.946	12.735	15.045	12.351	15.8	15.305	16.814	15.049	15.795
gene10798	cnpy2.L	19.752	22.07	16.137	21.808	15.553	17.534	18.803	17.631	7.717	5.424	17.189	18.678	15.917	19.665	14.015	14.556	16.086	17.95	16.667	22.829	16.917	17.316	17.734	16.833	19.67	17.253	17.607	16.628	16.9	15.547	17.918	14.875	15.781	14.958	17.175	15.166	14.867	19.027	16.411	21.29	16.271	16.99	18.951	17.181	20.875	20.311	19.174	19.451
gene10799	armh3.L	52.541	52.375	53.744	58.763	42.855	47.15	53.207	56.713	42.687	42.075	56.35	52.843	55.652	61.719	47.876	47.924	43.625	50.896	48.527	37.967	53.226	50.343	50.532	47.507	48.226	49.312	40.072	44.578	38.211	45.969	42.949	45.681	44.66	43.524	38.423	41.161	41.679	41.482	50.921	47.577	51.171	43.574	39.839	39.411	35.418	39.559	39.283	41.109
gene108	pcnp.L	13.294	12.164	8.064	9.152	13.851	13.541	12.844	15.52	18.158	18.051	12.629	14.096	14.148	15.386	10.324	11.686	12.236	12.777	12.434	14.335	15.059	17.67	16.929	17.196	17.82	16.901	12.371	12.598	12.907	11.717	13.534	14.098	13.228	14.543	12.784	14.388	12.963	12.112	14.201	12.976	15.245	12.274	11.707	12.465	12.274	11.948	13.092	12.972
gene1080	mxi1.L	1.435	1.54	2.465	1.794	0.858	0.565	3.972	3.159	114.575	122.468	2.464	3.487	1.28	1.431	1.474	3.345	1.478	1.198	0.912	1.398	4.025	6.368	4.953	7.762	8.953	10.628	3.255	3.116	4.043	9.305	10.701	11.363	10.985	8.48	8.81	0.884	2.088	1.046	2.634	3.567	9.653	2.19	1.525	3.229	2.112	4.165	2.585	1.822
gene10800	<NA>	0	0	0	0	0	0.259	5.605	6.005	0	0.167	5.219	3.759	0.106	0.109	3.733	5.006	0	0	0.927	0.445	2.761	3.975	3.417	2.958	3.096	3.218	3.195	5.358	6.322	5.176	6.371	6.404	6.772	6.111	7.855	0.216	0.263	0.563	5.84	5.043	4.777	0.258	0	0.141	0.143	0	0.767	0.533
gene10801	btbd10.S	71.176	71.847	74.686	66.542	68.183	76.607	52.954	50.485	34.77	41.13	56.723	51.601	62.353	58.828	63.986	68.504	81.6	73.675	72.572	83.977	81.625	73.078	81.305	68.76	67.79	74.982	68.916	65.018	63.072	63.72	61.334	66.253	52.851	59.26	57.935	75.54	70.325	60.504	66.352	67.191	59.012	85.517	88.647	85.744	93.212	80.195	86.076	78.633
gene10802	<NA>	0	0	0	0	0	0	0	0	0	0	0	0	0	0	0	0	0	0	0	0	0	0	0	0	0	0	0	0	0	0	0	0	0	0	0	0	0	0	0	0	0	0	0	0	0	0	0	0
gene10803	cavin1.S	0	0.029	0.07	0	0	0	0	0	0	0	0	0	0	0	0	0	0	0	0	0	0	0	0	0.054	0	0	0.053	0	0	0	0	0	0	0	0	0	0	0	0	0	0	0	0	0	0	0	0	0
gene10804	zbtb11.S	20.471	20.35	16.198	15.918	12.776	13.747	18.771	17.233	16.082	15.523	18.369	19.544	18.488	17.776	15.257	15.19	15.222	16.055	20.235	17.977	13.819	13.982	14.971	14.22	15.067	16.291	15.04	14.449	15.377	16.285	16.221	16.152	16.097	16.857	16.329	17.055	19.136	16.594	15.525	16.14	20.315	13.704	16.313	14.912	16.282	14.302	14.024	14.594
gene10805	lysmd4.S	9.528	8.316	23.537	23.315	58.715	56.973	49.41	46.578	14.602	14.989	48.497	49.127	56.362	53.731	21.705	18.764	20.13	23.501	24.115	29.761	35.356	32.449	33.204	32.64	31.895	35.086	16.849	18.185	17.712	16.462	16.36	17.322	18.656	18.229	20.069	18.208	20.18	19.548	49.984	49.099	51.154	38.341	36.24	37.11	38.442	37.142	38.596	40.066
gene10806	socs2.L	1.209	1.036	1.363	1.64	1.574	1.556	0.999	1.091	0.081	0.161	0.571	1.261	1.255	0.63	0.674	0.714	0.774	0.643	0.803	1.231	0.696	0.66	0.751	0.783	0.577	0.42	0.105	0.247	0.201	0.028	0.167	0.379	0.16	0.764	0.163	0.389	0.317	0.325	0.562	0.928	0.836	0.498	0.364	0.372	0.276	0.532	0.461	0.449
gene10807	<NA>	0	0	0	0	0	0	0	0	0	0	0	0	0	0	0	0	0	0	0	0	0	0	0	0	0	0	0	0.068	0	0	0	0	0	0	0	0	0.079	0	0	0	0.087	0	0	0	0	0	0	0
gene10808	ppp1r9b.S	0.118	0	0	0	0	0	0	0	0.106	0.158	0.037	0.108	0	0	0.033	0	0.023	0.022	0.029	0	0.083	0.086	0.047	0.093	0.126	0.127	0.092	0.252	0.038	1.125	0.183	0.425	0.946	0.445	0.47	0	0	0	0.046	0	0.137	0.041	0	0.044	0	0.174	0.161	0.084
gene10809	galk2.L	9.745	9.675	9.676	8.412	6.842	5.672	11.648	11.663	5.593	8.164	8.856	10.812	10.505	9.897	9.404	8.448	8.106	9.365	9.466	7.365	8.542	8.21	7.019	8.549	7.584	6.732	8.516	8.08	8.857	8.928	7.33	7.347	8.478	7.685	6.914	6.41	8.057	8.403	10.162	9.449	10.137	7.797	6.424	7.713	7.91	8.804	7.224	8.72
gene1081	<NA>	0	0	0	0	0	0	0	0	0	0	0	0	0	0	0	0	0	0	0	0	0	0	0	0	0	0	0	0	0	0	0.126	0	0	0	0	0	0	0	0	0	0	0	0	0	0	0	0	0
gene10810	homer2.S	20.68	20.624	9.587	8.553	20.02	20.24	14.553	18.534	8.922	7.602	15.383	15.373	17.905	19.252	23.443	24.048	22.793	24.457	23.996	23.386	7.22	11.05	10.328	11.925	10.269	10.497	21.296	17.316	19.374	19.823	19.287	18.052	18.097	18.676	18.358	17.564	21.314	17.948	16.547	19.757	14.038	8.91	9.439	12.242	13.629	9.805	12.244	8.96
gene10811	<NA>	2.287	2.046	2.927	3.519	0.684	3.38	3.437	3.456	1.755	3.198	4.134	3.871	4.173	3.613	2.078	2.585	2.419	2.687	2.909	2.81	2.635	3.464	1.812	4.254	3.481	2.22	3.67	3.08	2.911	2.907	2.826	3.329	2.999	3.277	3.895	2.348	3.214	4.413	2.545	3.749	3.784	1.689	2.634	2.329	2.245	1.924	2.339	3.486
gene10812	pip4p1.L	16.953	16.526	14.131	11.783	13.635	12.387	15.393	15.63	10.839	10.687	17.215	15.854	18.266	16.086	10.391	10.999	11.476	12.71	11.195	12.489	11.145	10.367	11.758	10.176	10.973	10.661	10.731	11.724	11.682	11.789	9.657	11.832	11.302	11.551	10.673	10.307	13.499	10.468	16.501	14.656	15.013	14.2	15.789	15.155	14.468	15.6	16.709	13.224
gene10813	stx8.S	8.149	8.353	10.194	9.183	8.374	7.023	5.589	5.881	3.663	3.237	5.696	6.354	6.143	5.981	5.583	4.902	5.032	5.716	7.331	6.688	6.378	5.119	6.197	4.879	6.589	4.813	4.72	4.092	4.803	3.961	5.057	5.178	5.278	5.53	6.044	6.377	7.475	8.625	7.223	6.979	5.547	7.774	8.739	8.8	9.928	8.302	8.555	7.245
gene10814	vash1.L	10.333	10.659	14.417	14.093	20.174	20.148	20.722	18.114	10.314	9.315	20.629	19.355	22.186	20.425	17.16	17.54	20.514	18.935	16.536	17.732	20.069	16.626	17.902	17.527	20.661	19.445	20.185	23.4	24.006	23.517	22.8	23.696	25.912	23.746	22.905	24.326	25.183	23.687	19.001	24.548	24.013	15.471	14.427	14.914	14.603	15.48	14.322	14.785
gene10815	atraid.S	23.576	28.123	37.471	36.841	26.432	17.094	23.437	21.767	5.443	7.076	23.97	21.316	22.967	24.365	27.293	26.716	38.553	31.881	26.487	42.446	22.635	34.024	31.69	29.154	22.302	23.419	21.378	22.043	18.155	23.962	23.121	22.147	24.1	20.819	25.852	32.397	33.847	24.568	28.594	20.539	26.905	23.056	25.81	26.316	20.711	26.998	26.464	26.119
gene10816	cldn12.L	22.878	21.608	28.059	28.949	37.85	35.6	14.465	15.526	27.751	28.699	15.422	15.229	15.611	15.825	20.983	21.544	20.168	23.186	20.927	24.096	30.377	26.914	27.636	27.763	28.037	24.812	18.835	20.79	19.964	21.667	19.155	19.33	20.211	20.179	18.063	19.113	20.682	19.697	14.359	14.094	14.236	26.544	26.661	25.038	24.67	25.99	25.82	21.52
gene10817	clcc1.L	3.219	3.387	3.717	4.668	2.83	2.797	2.897	3.202	1.23	1.514	2.98	3.22	3.194	3.617	2.822	2.814	2.779	3.347	4.076	3.026	2.844	2.917	3.473	2.787	3.52	3.228	1.824	2.347	2.04	2.408	2.264	2.352	2.053	2.256	2.269	1.918	2.114	2.16	3.26	3.312	2.98	2.751	2.271	2.699	3.746	2.504	2.899	3.164
gene10818	s1pr2.S	0	0	0	0	0	0	0	0	0.03	0.03	0	0.02	0	0	0	0.033	0	0	0.033	0	0	0.024	0	0	0.036	0.048	0	0.041	0	0	0	0	0	0	0.024	0	0	0.02	0.026	0	0	0	0	0	0	0	0	0.024
gene10819	cacybp.L	16.729	16.756	15.796	18.843	12.94	14.883	20.632	21.503	7.849	7.502	16.962	21.721	18.186	25.026	14.642	18.095	13.668	17.625	15.678	14.102	11.353	12.327	18.706	13.038	18.685	12.664	16.198	17.944	17.167	16.553	18.129	14.856	15.079	14.376	13.522	18.9	18.244	16.701	17.99	23.347	22.523	13.252	13.068	9.361	12.101	11.223	12.644	10.196
gene1082	mpo.L	0	0	0	0	0	0	0	0	0	0	0	0	0	0	0	0	0	0	0	0	0	0	0	0	0	0	0	0	0	0	0	0	0	0	0	0	0	0	0	0	0	0	0	0	0	0	0	0
gene10820	p2ry14.S	0	0	0	0	0	0	0	0.078	0	0	0	0	0	0	0	0.064	0	0	0	0	0	0	0	0	0	0	0	0	0	0	0	0	0	0	0	0	0	0	0	0	0	0	0	0	0	0	0	0
gene10821	src.L	51.329	52.073	62.214	48.844	54.351	51.76	60.673	56.834	59.711	60.027	57.273	53.838	67.283	59.16	62.459	61.055	70.852	63.023	62.59	71.045	53.992	50.293	51.4	47.945	52.503	52.494	49.278	49.509	47.974	48.977	48.653	46.542	50.544	51.93	45.716	56.118	57.61	47.216	62.037	53.239	60.279	70.824	76.184	78.069	80.789	78.33	76.468	73.316
gene10822	aebp2.S	50.697	52.423	81.729	70.269	67.695	51.905	66.421	63.798	32.901	29.697	61.109	52.795	73.524	61.182	68.953	73.577	88.348	65.552	70.675	77.345	50.316	49.334	55.336	50.805	43.469	47.53	47.834	45.595	42.096	49.159	43.059	45.556	47.888	54.193	48.541	56.195	56.809	51.892	71.443	54.67	67.994	86.456	89.785	88.783	87.434	80.011	83.282	89.731
gene10823	XB22169453.L [provisional]	48.661	50.315	46.813	45.59	37.725	33.152	29.853	28.62	10.736	11.409	30.94	29.715	35.038	28.855	34.568	37.274	44.544	36.219	43.465	57.736	53.695	49.812	48.993	44.825	45.993	47.108	37.244	37.001	34.67	31.274	32.805	35.26	35.454	39.279	34.062	50.188	50.121	40.217	36.716	30.513	34.766	36.353	36.667	35.291	38.204	36.812	38.764	37.289
gene10824	<NA>	0.699	1.459	0.671	1.47	4.571	5.421	1.814	1.98	0.977	0	1.382	2.654	2.231	3.05	1.208	0.108	0.511	0.559	0.648	1.036	3.063	2.395	3.288	3.274	1.978	2.187	0.846	0.531	1.251	1.072	1.349	0.131	0.259	1.095	1.104	1.004	0.46	1.049	2.381	2.073	2.529	0.602	0.812	0.819	1.167	1.415	1.489	2.33
gene10825	dcaf12.L	99.172	101.776	134.869	112.306	145.168	105.375	110.752	100.905	56.553	58.296	109.895	93.564	127.763	112.426	121.757	128.114	156.823	130.428	130.306	156.116	104.445	100.435	95.189	94.98	92.193	101.231	104.414	92.849	98.061	93.202	97.63	99.6	114.857	124.264	112.467	121.839	140.811	114.392	121.029	96.582	113.783	162.144	167.859	170.012	175.89	163.129	168.461	168.967
gene10826	stmn2.S	0.477	0.598	0.611	1.125	0	0	0	0.289	0.855	0.425	0.076	0.145	0.135	0.347	0	0.118	0.326	0.436	0.708	0	0	0	0	0	0	0	0.092	0	0	0.366	0	0	0.071	0.075	0	0.343	0	0	0	0.094	0	1.07	0.814	0.537	0.182	0.422	0	0.085
gene10827	heg1.S	0.62	0.871	0.794	0.72	0.448	0.516	0.947	0.905	0.909	0.761	1.15	0.39	0.334	1.214	0.355	0.344	0.104	0.156	0.317	0.127	0.338	0.274	0.297	0.548	0.57	0.535	0.124	0.065	0.068	0.033	0.198	0	0.095	0.034	0.077	0.061	0.113	0.16	0.208	0.042	0.165	0	0.199	0.04	0.163	0.094	0.109	0.114
gene10828	tmem170b.S	0.037	0.078	0	0	0	0	0.052	0.113	0	0	0.089	0.028	0.027	0.082	0	0	0	0	0	0	0	0	0	0	0	0	0	0	0	0	0	0	0	0	0	0	0	0	0.036	0.037	0.108	0	0	0	0.036	0	0	0
gene10829	rpl31.S	46.373	48.511	37.527	45.967	15.141	25.185	28.427	27.352	47.383	50.164	23.609	28.142	25.239	29.268	31.618	30.495	28.157	27.857	40.315	35.319	18.932	21.477	24.327	24.848	22.559	23.284	25.423	23.336	29.975	30.202	33.197	26.649	28.37	21.901	27.916	33.163	33.469	39.876	38.748	33.713	30.856	21.348	21.824	20.45	20.407	19.953	28.325	20.709
gene1083	<NA>	1.929	2.135	0.075	0	1.427	2.015	4.692	4.239	0	0	4.529	6.658	4.893	5.187	9.051	12.572	8.94	9.986	8.96	8.839	4.714	4.059	2.547	2.767	2.569	3.449	0.226	0.089	0	0	0	0	0.173	0	0.106	0.168	0	0.088	4.551	5.433	3.723	2.518	1.902	2.083	1.785	2.237	2.39	3.638
gene10830	mllt11.S	0.117	0	0	0	0	0.403	0	0.177	0	0	0.185	0	0	0	0	0	0	0	0.145	0	0.205	0	0	0	0.312	0	0	0.178	0	0	0.181	0	0	0	0	0	0.206	0	0	0.231	0.226	0	0	0	0	0	0	0
gene10831	arsk.L	1.79	1.245	3.053	2.626	0.32	0.633	0.508	0.485	1.232	1.633	0.653	0.767	0.716	0.401	1.65	1.361	1.118	1.677	1.815	0.748	1.85	2.432	1.363	1.72	1.65	0.985	1.422	1.186	1.095	2.041	1.772	1.513	1.766	1.151	0.912	1.451	2.579	1.377	0.179	0.545	0.089	0.554	1.422	1.205	0.525	1.149	0.704	1.224
gene10832	usp45.L	3.064	3.176	3.065	4.575	4.139	3.719	2.658	2.184	1.883	2.064	2.764	2.917	3.031	3.202	2.148	2.241	1.703	2.07	2.054	1.696	2.156	2.76	3.462	3.064	3.132	3.588	2.298	1.738	1.922	1.357	1.833	2.328	1.342	1.048	1.676	1.829	1.705	2.234	2.184	2.347	2.207	1.227	1.271	1.497	1.482	1.62	1.875	1.918
gene10833	<NA>	0	0	0	0	0	0	0.1	0.217	5.953	6.398	0.455	0.109	0	0	0.596	0.267	0	0	0	0	0.126	0.394	0.285	0.142	0.096	0.129	0.696	0.656	1.029	0.441	0.666	0.108	0	0.113	0.13	0	0	0	0	0.142	0	0	0	0	0	0	0	0
gene10834	psmb2.S	68.035	70.254	65.177	69.986	54.587	52.704	53.047	50.791	26.427	32.879	52.939	56.786	52.331	56.398	58.701	59.563	59.502	62.487	69.063	54.464	59.574	63.028	74.917	61.16	72.946	59.591	64.12	63.99	62.808	56.784	66.363	56.665	57.494	55.182	60.847	66.107	65.786	72.299	58.253	60.902	53.699	60.934	55.586	53.261	64.573	60.592	57.781	62.487
gene10835	gata3.S	0	0	0	0	0.144	0	0.057	0.498	8.384	8.334	0.065	0.125	0	0	0	0.102	0	0	1.12	0.916	0.144	0.451	0.082	0.325	1.097	0.736	0.08	0.125	0.065	0.316	0.318	0.555	1.524	0.323	0.372	0.118	0.723	0.247	0.08	0.081	2.225	1.845	1.595	1.235	1.336	1.334	0.631	1.171
gene10836	mgc147600.L	0.069	0	0.133	0	0	0	0.143	0.052	0.464	0.231	0.219	0.052	0	0.101	0.048	0.128	0.337	0.095	0.085	0	0.182	0	0.137	0	0.092	0.062	0	0.053	0.055	0.106	0.053	0.052	0.051	0.054	0.062	0	0.061	0	0.067	0.068	0.267	0.238	0.161	0.13	0.066	0.102	0.118	0.061
gene10837	brip1.L	43.675	45.068	43.611	46.289	40.302	47.563	45.111	51.133	8.442	8.679	46.332	50.13	47.995	54.26	39.55	36.749	37.129	40.669	48.985	48.23	39.72	44.006	43.128	42.729	47.024	41.974	32.311	34.735	31.888	35.641	34.662	36.4	32.872	33.106	35.662	34.164	35.815	38.688	41.924	52.485	46.225	43.727	41.63	43.174	38.26	40.436	42.097	39.752
gene10838	poll.L	14.393	14.802	14.929	13.942	14.523	16.758	13.427	12.996	7.804	8.369	14.172	13.868	14.366	15.406	12.419	11.81	12.601	13.574	14.215	14.634	14.228	12.012	13.355	15.59	13.51	13.869	12.483	13.494	12.573	15.332	13.123	12.761	16.02	14.308	13.856	12.997	15.33	13.732	13.783	10.785	12.646	14.934	13.692	15.616	13.109	12.167	14.01	12.102
gene10839	tmc5.S	0	0	0	0	0	0	0	0	0	0	0	0	0	0	0.037	0	0	0	0.033	0	0	0	0	0.159	0.036	0	0	0	0	0	0	0	0	0	0	0	0	0	0	0	0.052	0	0	0	0	0	0	0
gene1084	<NA>	0	0	0	0	0	0	1.081	0.738	3.06	3.693	0.463	0.89	0.139	0	1.35	2.173	0	0	0.483	0.724	0.685	0.357	0.193	0.963	0.65	1.048	2.08	1.93	1.709	3.595	3.017	3.951	3.326	4.898	4.762	0	0	0	0.19	1.352	3.016	0.337	0.757	0.549	0.373	0.863	0.666	0.521
gene10840	<NA>	0.968	0.976	1.432	1.911	0.291	0.806	0.647	0.479	0.224	0.223	0.634	0.558	0.687	0.729	0.993	0.949	1.025	0.961	1.032	1.04	0.322	0.092	0.364	0.461	0.156	0.299	0.905	1.624	1.567	1.869	1.367	1.201	1.236	0.863	0.754	1.224	2.522	1.077	0.455	0.33	0.645	1.64	1.035	0.72	0.382	0.836	0.996	0.653
gene10841	ttc30a.S	35.981	37.984	39.003	38.232	43.745	48.731	58.477	64.3	28.87	29.042	54.953	65.191	61.195	73.439	50.599	52.804	49.824	61.611	53.253	46.183	61.277	68.668	64.45	62.244	64.003	63.046	60.818	58.601	64.752	60.15	69.469	64.998	67.269	57.593	61.175	52.806	52.448	63.169	47.831	62.623	63.096	44.114	39.514	36.146	34.039	37.461	36.612	35.921
gene10842	sec61g.L	60.575	61.078	56.938	59.463	87.382	84.433	68.958	69.344	164.205	178.621	65.493	71.703	62.477	63.379	54.669	65.638	55.824	67.126	62.292	48.925	95.872	102.331	98.694	107.669	101.21	101.621	104.45	83.98	91.293	89.749	108.723	84.173	89.816	69.144	89.815	85.559	80.608	84.022	63.329	85.601	81.551	57.351	57.228	55.044	57.087	60.834	59.097	55.188
gene10843	axin2.S	78.638	80.377	73.135	66.472	78.436	81.466	57.739	50.621	70.208	73.955	54.662	51.682	55.535	48.649	45.055	45.511	52.219	48.686	67.833	73.335	67.731	62.974	65.135	56.105	58.165	58.576	37.877	40.083	38.937	39.617	35.323	38.156	37.575	43.005	35.638	56.009	61.796	54.567	53.828	47.834	54.671	64.61	64.147	70.727	67.911	68.616	65.745	66.082
gene10844	oat.1.L	350.473	356.233	298.493	333.625	270.493	235.397	278.378	271.904	69.368	69.186	265.247	291.431	262.98	285.375	234.017	230.887	259.154	249.009	304.118	372.886	327.435	337.374	335.586	308.842	332.392	335.139	260.166	259.487	256.938	250.752	233.84	237.472	226.188	219.656	224.5	316.008	325.931	337.823	273.971	314.092	254.034	357.016	366.965	348.504	343.167	360.283	354.327	350.067
gene10845	otud7b.S	41.181	40.432	47.57	39.926	58.069	58.35	35.974	33.638	22.882	24.316	35.969	32.25	40.386	34.813	35.519	38.795	44.141	38.381	43.843	54.708	53.252	49.527	46.249	45.601	43.336	49.537	29.557	28.983	28.724	27.04	29.177	30.415	27.444	31.694	27.156	38.614	36.67	34.317	38.392	31.632	36.313	53.433	50.279	58.898	53.066	55.959	57.125	56.522
gene10846	asphd2.S	13.724	14.29	24.509	25.562	14.175	13.895	33.01	36.235	5.59	4.594	31.504	32.129	30.913	40.275	13.218	13.836	14.343	13.908	13.631	9.581	0.876	0.304	0.858	1.511	1.774	0.834	20.965	27.799	23.578	25.698	26.395	27.1	25.101	22.342	23.823	22.687	26.56	27.642	31.84	30.569	28.353	15.041	15.282	14.242	10.744	13.88	14.588	14.453
gene10847	alg1.L	28.471	27.47	27.855	32.286	21.448	22.471	25.872	27.871	5.917	5.745	22.465	28.394	26.177	28.003	23.21	20.524	17.971	23.707	26	15.408	22.1	19.891	16.809	24.619	22.274	18.361	20.72	22.995	22.985	24.238	24.505	20.913	26.491	22.164	23.321	22.177	26.458	25.375	24.061	24.567	27.416	18.227	16.106	14.183	17.837	15.934	15.718	16.621
gene10848	<NA>	0.347	0.527	0.403	0.106	0.33	0.544	0.349	0.953	0.494	1.122	0.997	1.149	0.492	1.101	0.349	0.39	0.246	0.432	0.663	0.842	0.055	0	0	0.187	0.21	0.056	0.305	0.288	0.602	0.677	0.487	0.378	0.42	0.544	0.513	0.589	0.443	0.331	0.737	1.06	0.974	0.163	0.586	0.177	0.481	0.418	0.591	0.336
gene10849	rnf19a.L	117.651	116.683	129.101	120.734	130.498	106.277	96.93	92.727	59.138	66.705	99.726	91.521	116.957	99.818	98.185	103.45	127.5	103.644	109.869	133.008	106.618	103.356	98.537	92.748	92.037	96.209	84.771	85.757	83.046	84.848	78.394	90.36	96.174	103.867	90.346	108.2	113.351	96.723	108.788	97.942	113.266	154.071	156.021	160.765	159.649	149.66	151.817	152.347
gene1085	nudt7.L	0.046	0	1.84	1.562	0	0	3.596	3.505	0	0	4.769	4.51	3.226	2.768	0.321	0	0	0	0	0	3.579	2.12	0.919	2.196	1.668	2.24	0	0	0	0	0	0	0	0	0	0	0	0	2.168	4.405	3.313	0	0	0	0	0	0	0
gene10850	<NA>	0	0	0	0	0	0	0	0	0	0	0.056	0	0	0	0	0	0	0	0.044	0	0	0	0	0	0	0	0	0	0	0	0	0	0	0	0	0	0	0	0.069	0	0	0	0	0	0	0	0.121	0
gene10851	<NA>	0.518	0.18	0.221	0	0	0	0	0.782	2.317	1.152	0	0.262	0.245	0.502	0.477	0.213	1.345	0.788	0	0	0	0	0	0	0	0	0.334	0	0.275	0.265	0.267	0	0.256	0	0	0	0.303	0.259	0.336	0	0	2.379	0.802	0.971	2.306	1.016	3.529	1.535
gene10852	nipsnap3a.L	22.28	22.943	24.819	27.116	17.694	13.03	23.678	26.598	11.796	14.603	18.405	20.396	23.288	26.338	16.777	19.182	24.515	23.081	27.545	25.955	19.182	21.086	22.855	24.325	25.035	21.697	21.188	18.295	23.415	21.815	25.349	22.801	23.56	22.134	22.454	23.438	22.534	22.388	24.398	25.967	20.541	24.17	21.12	24.994	26.005	23.871	20.848	23.17
gene10853	cebpg.L	33.191	32.043	28.406	29.983	28.984	33.601	34.304	29.595	11.253	11.453	32.684	31.063	35.204	31.079	29.003	29.219	28.812	28.507	29.606	29.576	31.991	34.311	27.797	29.094	29.882	29.458	28.103	29.413	29.748	30.521	26.336	30.856	28.469	30.097	30.534	31.69	31.248	26.663	29.37	26.618	28.333	26.413	26.24	28.337	26.324	26.973	25.872	24.997
gene10854	hemk1.L	12.7	14.532	11.256	10.861	12.799	9.331	12.787	13.132	10.25	9.436	13.582	13.124	12.556	13.934	14.86	15.282	15.034	15.906	17.149	15.049	14.691	14.459	14.537	14.372	13.517	14.751	13.406	15.231	13.619	13.85	13.989	13.413	14.41	14.437	14.335	12.415	14.9	15.23	12.109	10.912	12.357	13.276	13.633	11.274	11.771	12.798	11.53	12.264
gene10855	hoxd3.S	0	0	0	0	0	0	0.024	0	0.038	0	0	0	0	0	0	0	0	0	0.032	0.051	0	0	0	0	0.011	0	0	0	0	0.013	0	0	0	0	0	0	0	0	0	0	0.016	0.044	0.013	0	0.016	0	0	0
gene10856	ift43.L	8.234	7.036	6.081	4.464	5.589	6.096	4.971	4.258	4.575	4.671	3.933	3.357	4.862	4.904	3.209	5.533	4.253	4.392	6.08	5.981	8.331	9.493	10.836	9.591	9.861	10.374	9.417	7.56	8.877	6.441	5.975	6.706	6.463	5.109	5.688	8.734	6.114	7.297	3.335	5.683	3.093	10.38	7.451	6.839	7.804	8.055	7.533	6.977
gene10857	tardbp.S	70.934	69.802	47.223	49.974	43.41	43.585	55.11	52.482	24.677	24.706	54.565	61.139	58.011	63.435	53.364	54.434	55.174	58.435	59.259	74.045	55.998	64.348	68.186	58.181	69.55	58.871	54.685	55.918	54.689	55.271	49.458	50.571	58.191	60.054	60.39	71.021	70.484	69.442	46.77	52.269	54.276	49.549	49.017	50.667	46.677	51.03	46.778	55.469
gene10858	<NA>	53.069	52.106	65.894	57.342	66.921	67.202	56.879	57.336	43.191	42.081	60.747	55.545	63.979	58.174	45.997	49.286	52.821	47.677	50.334	50.863	40.498	38.85	38.005	34.434	38.735	36.5	41.018	41.123	41.808	39.96	45.104	42.486	47.151	53.879	46.986	50.393	53.845	46.352	56.175	48.42	61.101	51.317	51.444	53.321	48.112	52.994	54.207	51.244
gene10859	rbms2.S	0.833	0.979	1.037	0.733	1.099	1.578	0.935	0.805	9.691	9.833	0.878	0.832	0.873	0.874	1.193	1.03	1.163	1.179	1.958	1.691	2.158	1.907	1.992	1.539	2.029	1.959	1.25	1.38	1.051	1.128	1.217	1.237	1.111	1.176	0.949	1.24	1.397	1.351	0.979	0.757	0.884	1.423	1.396	1.45	1.647	1.238	1.471	1.121
gene1086	eri2.L	184.46	186.869	191.265	179.853	183.53	214.85	128.247	117.42	128.855	128.295	124.644	121.232	126.639	123.086	173.147	173.909	165.097	182.006	197.973	156.434	181.14	172.423	165.41	172.6	163.868	176.675	156.062	171.327	170.791	170.763	150.232	169.068	192.081	190.473	187.671	185.376	202.1	200.226	112.809	99.202	125.472	126.01	120.173	121.824	117.457	121.54	115.669	123.945
gene10860	kiaa0319l.L	16.434	16.466	21.309	19.727	16.145	18.696	26.687	28.759	27.396	24.979	28.719	26.916	31.364	30.445	17.646	17.505	19.078	18.392	16.931	18.883	15.942	16.218	14.052	17.016	14.663	16.748	19.73	20.609	20.257	23.818	19.545	21.051	22.626	24.551	18.203	23.022	25.013	22.152	24.633	24.431	26.273	23.081	19.739	20.596	20.49	19.961	18.155	21.868
gene10861	apoa4.L	0	0	0	0	0	0	0	0	0	0	0	0	0	0	0	0	0	0	0	0	0	0	0	0	0	0	0	0	0	0	0	0	0	0	0.128	0	0	0	0	0	0	0	0	0	0	0	0	0
gene10862	rnf40.S	36.741	38.406	41.657	40.045	46.976	40.543	34.421	33.538	39.937	44.234	36.023	32.798	38.183	37.507	38.878	42.56	43.386	38.624	42.665	51.453	35.007	35.536	33.007	29.387	33.048	35.358	33.388	32.154	30.49	33.624	30.417	30.784	30.948	34.917	31.834	39.296	45.033	37.154	40.481	32.248	38.274	62.179	65.396	65.077	64.02	65.287	61.106	63.179
gene10863	irf5.S	9.214	9.299	0.278	0.146	0.152	0	1.083	1.642	10.503	8.218	1.168	1.386	0.308	0.822	0.721	0.269	0.254	0.357	0.537	0.58	0.305	0.159	0.258	1.114	0.579	0	0.421	0.396	0.207	0.067	0.403	0.26	0.193	0.409	0	0.125	0.076	0	1.692	1.031	1.09	1.198	0.876	0.163	1.161	1.024	0.815	0.232
gene10864	<NA>	0.786	0.912	0.671	0.735	1.524	0.301	0.605	0.858	0.782	0.389	0.484	0.464	0.434	0.572	1.268	0.54	0.596	0.279	0.864	0.712	1.149	0.639	0.865	0.431	1.396	1.328	1.945	0.598	1.112	0.871	1.214	0.72	0.905	0.342	0.473	0.816	1.151	0.983	0.51	0.691	0.506	0.602	1.219	0.41	0.667	0.643	0.595	0.699
gene10865	lrsam1.L	4.897	4.873	5.932	5.714	5.694	6.303	8.36	7.794	3.945	3.631	7.694	8.282	8.2	8.265	4.74	4.238	4.739	4.027	5.409	7.552	5.438	5.549	6.338	6.053	5.913	5.662	4.426	3.772	3.895	4.256	3.681	4.207	3.673	4.809	5.189	5.489	5.906	5.585	9.343	8.072	7.31	8.553	8.602	8.082	6.729	8.22	7.956	8.476
gene10866	pltp.S	0.065	0.068	0.041	0.327	0.226	0	0.134	0.049	0.362	0	0.102	0.049	0.092	0.047	0.045	0.04	0.063	0.03	0.08	0.048	0.17	0.355	0.192	0.128	0	0.116	0.063	0	0.052	0.05	0.05	0.097	0.096	0	0.175	0.047	0.114	0	0	0.064	0	0	0	0.121	0	0.095	0.11	0.23
gene10867	dcaf10.S	32.449	32.668	33.93	39.936	36.953	35.48	26.728	27.988	22.759	20.335	32.553	27.402	24.139	27.481	36.661	37.195	34.502	39.38	43.336	32.852	49.034	49.676	49.766	55.401	53.372	53.256	33.177	38.099	39.191	45.125	41.892	36.735	43.199	38.518	38.377	38.1	39.445	40.516	24.278	24.905	31.315	35.16	29.931	36.442	31.772	34.049	32.599	30.466
gene10868	ints5.L	15.738	16.623	20.861	20.665	22.401	18.248	15.466	13.719	11.107	10.937	15.589	13.4	13.82	14.136	14.376	14.919	18.197	15.99	16.142	19.637	18.642	18.659	17.987	15.543	16.166	18.297	16.172	14.733	15.229	15.009	14.898	16.812	15.951	16.958	15.932	16.732	19.418	17.933	12.548	11.167	13.803	19.298	19.689	20.999	18.811	19.119	19.603	19.034
gene10869	<NA>	0	0	0	0	0	0	0	0	0	0	0	0	0	0	0	0	0	0	0	0	0	0	0	0	0	0	0	0	0	0	0	0	0	0	0	0	0	0	0	0	0	0	0	0	0	0	0	0
gene1087	dock1.L	35.3	36.877	44.929	36.361	33.575	38.761	34.599	31.577	31.097	35.699	33.75	30.911	38.259	36.738	32.652	36.068	35.215	35.621	39.313	35.505	31.824	28.009	30.794	27.718	25.617	27.375	28.493	28.596	29.722	27.72	27.48	29.056	31.035	28.767	27.877	32.445	35.134	32.022	32.74	27.486	37.824	29.497	31.103	33.894	30.777	29.987	33.448	33.313
gene10870	golgb1.L	4.089	4.384	4.324	4.952	3.163	4.394	7.648	7.302	5.226	6.755	7.238	8.238	7.502	9.795	4.542	4.008	3.617	5.486	5.743	5.809	5.624	5.581	6.049	6.496	6.414	5.782	2.8	3.108	2.681	3.293	2.775	2.679	3.28	2.333	3.26	3.245	3.636	2.875	5.013	6.971	7.281	5.293	5.542	5.149	5.404	6.083	5.35	5.704
gene10871	<NA>	0	0	0	0	0	0	0.169	0	0	0.542	0	0	0	0.177	0	0	0	0	0	0	0	0	0	0	0	0	0	0	0	0	0	0	0	0	0	0	0	0	0	0.241	0	0	0	0	0	0	0	0
gene10872	guca1a.L	0.435	0.378	0.603	0.244	0.126	0	0.201	0.219	0.162	0.161	0.401	0.055	0.257	0.211	0.1	0.045	0.106	0.232	0.09	0.322	0.445	0.331	0.502	0.429	0.772	0.259	0.702	0.275	0.288	0.5	0.168	0.217	0.697	0.511	0.262	0.312	0.636	0.544	0.071	0.215	0.07	0.062	0.112	0.136	0.415	0.16	0.062	0.129
gene10873	<NA>	0	0	0	0	0	0	0.295	0	0	0	0.337	0	0	0.31	0	0	0	0	0	0	0	0.39	0	0.42	0	0	0	0	0	0	0.329	0	0	0	0	0	0	0	0	0	0.411	0	0	0	0	0	0	0
gene10874	stk35.S	144.498	145.561	144.337	143.58	151.898	123.834	119.521	115.028	43.587	36.41	113.735	117.895	133.996	115.947	118.064	109.96	143.293	120.171	127.55	198.866	159.188	175.822	180.156	171.925	178.032	177.05	133.527	137.577	130.761	119.384	138.306	125.057	124.12	126.394	132.421	161.434	150.623	140.253	131.637	155.564	126.222	215.07	238.76	246.248	267.986	227.906	236.384	216.78
gene10875	myo1e.1.L	39.718	38.547	35.144	33.084	32.838	38.303	31.282	28.996	9.023	9.278	30.408	27.364	36.124	32.834	28.665	30.251	32.724	30.136	36.031	34.871	36.5	34.253	33.869	30.992	30.745	35.059	31.637	32.516	31.739	33.258	30.019	33.474	32.052	34.687	30.849	37.598	41.032	33.396	28.738	26.287	32.901	30.511	30.417	27.91	32.433	27.392	29.638	29.913
gene10876	mxi1.S	9.112	8.034	9.501	8.971	0.759	1.313	4.065	3.986	8.947	7.926	4.086	4.586	3.319	3.126	6.505	6.624	6.783	5.914	6.557	6.815	5.674	4.722	4.418	4.184	4.673	4.523	6.426	6.119	6.1	5.089	5.881	5.664	5.355	5.669	5.256	6.175	7.356	8.244	2.912	4.68	5.04	1.734	2.445	1.836	2.907	2.002	3.105	2.031
gene10877	mc2r.L	0	0	0	0	0	0	1.206	1.722	0.15	0.149	0.636	1.019	0	0.098	0	0	1.568	0	2.155	2.883	2.116	4.779	1.195	5.554	0.804	5.875	6.493	8.154	5.759	3.497	7.561	7.033	6.651	7.146	4.723	14.067	5.535	10.062	0.392	1.326	0.129	0	0	0	0	0	0	0
gene10878	dnaja3.L	52.46	50.57	49.516	49.559	50.242	49.658	49.155	47.521	27.389	28.713	49.83	46.883	56.313	52.374	44.338	42.882	50.403	43.483	48.469	56.502	48.585	45.127	47.06	44.168	43.206	45.68	46.162	51.429	49.52	46.356	48.006	50.129	51.393	56.202	50.002	62.244	59.371	55.981	54.366	45.244	53.797	65.629	64.821	70.511	66.556	66.182	68.718	69.619
gene10879	stau1.L	46.473	46.13	54.598	41.526	54.693	58.716	36.564	36.744	57.844	60.27	39.476	38.453	44.804	47.75	51.421	58.637	62.801	53.437	57.894	64.633	40.955	37.169	35.92	35.204	33.999	38.781	40.074	38.538	37.044	34.356	39.433	43.737	42.533	43.072	39.621	50.221	43.525	42.95	46.031	37.483	42.48	64.403	70.925	71.012	73.693	68.842	75.859	77.075
gene1088	<NA>	0	0	0.019	0.05	0	0	0.041	0.022	0	0	0	0.022	0	0.043	0	0	0.014	0	0	0	0	0.054	0.029	0	0	0	0	0.067	0	0	0.023	0.11	0.022	0.046	0.027	0	0.026	0.044	0.029	0.029	0	0	0	0	0	0	0	0
gene10880	<NA>	19.915	19.604	29.643	21.006	25.618	15.612	18.924	18.771	4.677	5.941	19.971	16.094	22.162	22.343	22.596	27.059	28.988	26.044	26.2	28.321	19.238	14.377	16.388	17.119	15.619	15.727	19.057	17.166	18.839	15.316	17.846	21.138	20.672	24.293	19.923	25.194	24.829	20.081	23.792	17.397	20.787	32.319	29.2	33.534	30.637	30.646	32.352	34.07
gene10881	psmd11.L	65.377	62.828	72.978	68.02	62.905	57.948	61.307	58.438	56.995	57.273	64.488	59.292	66.28	65.197	60.969	56.96	70.817	59.005	67.966	80.629	50.131	45.391	46.77	44.696	40.714	45.753	54.914	52.425	52.465	50.953	48.871	53.686	58.201	56.587	56.714	57.396	62.305	54.777	63.905	61.17	64.961	73.34	74.109	76.466	75.554	69.645	76.695	77.573
gene10882	srf.L	38.82	37.159	42.545	36.398	49.048	37.283	38.141	35.604	35.667	39.167	40.191	36.79	42.445	39.532	38.884	42.096	47.947	43.413	41.437	54.376	52.179	46.77	52.05	48.593	48.96	52.949	41.828	40.397	41.701	41.443	41.277	45.128	45.077	48.275	38.633	52.139	48.922	43.409	39.091	37.24	45.369	64.693	69.724	72.741	70.957	66.016	70.262	66.752
gene10883	spns2.L	0.222	0.142	0.022	0.115	0	0	0.094	0.103	9.457	7.619	0.189	0.155	0	0.05	0.141	0.19	0.033	0.047	0.232	0.152	0.209	0.125	0.169	0.269	0.182	0.122	0.132	0.104	0.108	0.078	0.079	0.026	0.151	0.08	0.062	0.269	0.06	0.051	0.066	0.034	0.164	0.088	0.132	0.032	0.13	0.1	0.087	0.03
gene10884	prkra.L	85.765	83.044	93.405	95.253	91.22	89.314	97.543	111.209	98.636	98.325	105.733	96.979	110.723	109.24	103.552	94.563	95.512	102.079	103.527	72.181	85.995	81.79	80.99	80.639	82.166	83.972	81.793	90.242	90.618	90.767	87.144	86.093	90.433	96.688	89.919	90.945	83.882	84.567	93.818	95.315	92.185	75.965	65.748	69.651	65.727	72.944	77.937	79.911
gene10885	chrm1.S	0	0.046	0	0	0	0	0	0	0	0.099	0	0	0	0	4.474	4.055	5.873	4.05	4.658	5.061	0.078	0	0	0	0	0	0	0	0	0	0	0.133	0	0	0	0	0	0	0	0.088	0	0	0	0	0	0	0	0
gene10886	rplp1.L	258.715	246.223	262.673	296.825	261.395	134.047	267.571	251.716	192.002	191.831	231.203	226.671	262.927	265.795	245.667	251.347	278.488	263.547	273.39	247.67	125.672	121.079	108.862	131.096	109.639	133.995	139.657	140.006	132.676	164.246	159.372	135.064	237.975	209.692	208.315	282.464	266.664	250.984	268.103	213.953	229.333	209.265	236.678	264.778	245.414	236.991	234.309	296.657
gene10887	col8a1.L	0.033	0.068	0.021	0	0	0	0	0.025	0	0.036	0.103	0	0	0	0.112	0	0	0	0	0	0	0.059	0	0	0.043	0	0	0	0	0.05	0	0.024	0	0.051	0.029	0.023	0.029	0	0.032	0.064	0.094	0	0.025	0	0	0	0	0
gene10888	gypc.S	0	0	0	0.285	0	0	0	0.064	0	0.094	0.067	0.128	0.06	0	0.117	0.105	0.041	0.077	0.052	0.188	0	0	0	0	0.056	0	0	0	0	0	0.065	0	0.063	0	0	0	0	0.063	0	0.084	0	0	0	0	0	0	0	0
gene10889	<NA>	0.237	0.248	0.041	1.225	1.215	1.637	0.635	0.167	0.744	0.986	0.451	0.409	0.067	0.345	0.963	0.157	0.54	0.81	1.683	0.821	1.776	0.665	1.066	2.716	2.445	2.604	0.153	0.193	0	0.17	0.758	0.047	0.047	0.273	0.343	0.409	1.168	0.024	0.092	1.096	0.244	1.419	3.508	1.395	1.933	2.424	3.183	3.406
gene1089	arsb.L	3.121	3.827	4.292	4.726	0.68	0.538	4.913	5.363	1.222	1.475	5.922	4.621	4.926	5.618	3.344	4.629	5.32	4.811	4.822	4.222	1.641	0.784	1.391	1.462	1.247	1.046	1.888	1.838	1.551	2.393	2.109	2.805	2.541	2.323	2.959	1.681	2.535	2.458	4.328	4.552	3.689	2.487	2.539	2.926	2.903	3.331	1.994	3.052
gene10890	gpi.L	204.266	206.131	166.069	203.296	128.023	120.422	190.107	201.189	84.538	82.483	201.001	216.145	195.978	232.296	209.151	220.891	214.855	225.352	226.357	199.911	103.446	109.799	111.452	95.389	104.13	100.313	249.032	248.419	248.054	262.345	253.83	248.39	265.805	256.856	267.482	243.151	264.639	267.721	208.501	200.987	194.581	136.234	141.675	134.233	143.683	155.872	134.064	132.639
gene10891	dennd1c.S	0	0	0	0	0	0	0.145	0.079	0.118	0	0.249	0.08	0	0	0	0	0	0	0	0	0.092	0.192	0.104	0.104	0.07	0.094	0	0	0	0.161	0	0	0	0	0	0	0	0	0	0.208	0	0	0	0.099	0	0	0	0
gene10892	fgl1a.L	0	0.052	0.19	0	0	0.171	0.069	0	0	0	0.157	0.075	0.07	0.072	0.068	0	0.096	0.045	0.122	0	0	0.09	0.098	0	0.132	0	0	0	0	0	0	0	0	0	0	0.071	0	0.074	0	0.098	0	0	0.153	0	0.094	0	0	0
gene10893	tal2.S	0	0	0	0	0	0	0	0	0	0	0	0	0	0	0	0	0	0	0	0	0	0	0	0	0	0	0	0	0	0	0	0	0	0	0	0	0	0	0	0	0	0	0	0	0	0	0	0
gene10894	<NA>	115.617	119.369	171.526	156.517	104.323	62.459	70.632	70.672	29.27	31.268	70.089	70.28	70.976	77.716	147.539	155.717	191.524	160.134	196.231	251.369	124.586	133.868	128.16	112.587	109.927	124.479	122.266	116.157	109.369	107.494	113.323	117.47	138.561	142.755	120.727	179.811	223.484	148.059	102.009	64.715	92.168	190.3	206.604	207.145	209.093	205.984	192.955	191.08
gene10895	crem.L	17.142	17.205	14.995	15.32	16.215	18.03	18.283	18.144	4.854	4.74	17.155	17.829	21.631	17.924	12.185	12.739	12.794	13.095	13.77	13.297	13.889	13.805	13.506	14.44	14.007	14.096	12.716	12.631	14.788	14.141	12.326	12.45	13.363	12.567	12.559	12.496	13.335	11.888	16.327	15.132	13.085	13.352	13.029	14.711	14.417	13.119	12.51	13.468
gene10896	jun.L	1.099	1.63	3.479	2.921	4.036	3.191	4.644	2.098	0.647	0.772	2.928	2.636	1.888	0.842	2.16	4.005	2.029	1.533	4.506	4.031	5.173	2.749	3.896	6.504	4.777	4.241	2.241	1.143	1.104	2.662	1.519	1.907	2.484	2.901	3.134	1.33	2.743	1.736	3.379	3.204	4.578	3.091	3.407	4.665	2.76	2.896	4.14	3.189
gene10897	cep83.L	36.251	37.837	39.819	43.132	42.971	64.561	47.575	50.65	34.064	35.831	47.981	57.697	48.627	57.688	36.415	36.849	35.281	41.301	37.902	31.335	44.872	53.181	46.422	47.687	52.756	44.245	36.334	36.217	39.472	37.355	35.706	34.264	34.59	30.734	36.827	33.114	36.185	38.407	40.592	52.303	46.257	30.932	33.853	35.384	29.794	32.42	33.903	37.141
gene10898	cyp51a1.L	19.73	22.152	22.33	22.62	21.797	16.802	25.403	24.108	18.118	17.049	21.88	24.775	26.157	25.218	25.431	26.966	35.111	28.295	30.515	32.458	27.08	26.864	23.979	23.952	27.165	26.915	24.736	21.568	22.193	23.208	22.947	22.848	21.704	26.115	22.218	25.243	26.851	24.829	26.627	22.932	25.261	35.628	32.285	35.231	34.653	35.762	32.215	35.155
gene10899	incenp.S	197.708	192.582	186.687	169.991	256.647	268.058	212.445	195.527	170.908	183.908	214.169	196.689	238.706	224.362	174.55	178.052	217.551	184.029	197.79	238.749	204.149	197.346	187.099	196.948	175.33	213.271	163.928	165.736	165.238	151.612	149.636	152.463	144.14	158.417	144.938	222.052	207.781	205.162	198.972	198.756	202.232	304.683	310.984	333.005	326.23	314.635	312.381	333.538
gene109	<NA>	9.676	9.362	13.24	8.32	14.165	7.426	10.068	9.657	3.477	4.713	11.225	9.44	12.277	11.612	12.84	14.319	16.754	16.357	17.158	17.173	5.943	4.711	5.596	4.179	4.185	5.43	8.548	7.139	7.246	7.149	7.582	7.46	6.117	9.076	7.972	10.655	9.427	9.061	15.674	9.01	14.586	14.362	13.519	15.231	14.287	14.194	15.104	17.269
gene1090	rbm14.L	9.219	10.676	15.468	12.965	13.715	13.097	13.789	15.493	67.536	68.79	16.303	14.487	11.31	11.055	13.738	14.615	10.689	11.117	12.054	9.375	16.907	15.343	16.577	16.924	15.178	15.106	13.016	12.237	12.931	15.606	14.65	15.325	17.896	15.779	14.298	10.154	10.498	8.332	13.085	10.824	15.64	11.859	10.665	10.512	11.307	10.444	12.812	12.33
gene10900	poldip3.L	95.765	99.6	84.344	84.214	88.099	90.8	78.888	77.34	73.445	78.719	78.663	79.242	71.586	71.582	77.918	79.145	75.463	74.502	83.577	87.915	84.891	87.259	87.221	79.85	79.73	78.065	72.191	80.074	74.226	76.026	72.915	74.926	68.837	75.724	71.9	79.424	78.399	81.223	75.399	73.196	70.778	103.177	103.78	98.213	97.178	101.422	107.601	96.734
gene10901	<NA>	0.037	0	0	0	0	0	0	0	0	0	0	0	0.027	0	0	0.023	0	0	0	0	0.033	0	0	0	0.025	0	0.073	0	0.06	0	0	0.028	0.111	0.088	0	0	0.066	0	0.036	0	0.072	0	0	0	0	0	0	0
gene10902	prep.L	66.379	64.825	65.069	55.452	57.317	61.558	79.333	79.628	36.675	39.624	82.741	78.09	83.847	79.068	61.241	65.155	66.766	69.036	68.52	59.088	65.331	60.063	58.266	64.479	54.222	59.997	52.786	53.434	57.558	56.029	52.496	54.41	59.319	55.289	54.838	59.307	65.294	58.701	73.552	66.964	79.499	68.309	66.847	65.837	66.178	62.868	61.369	65.345
gene10903	kcnv2.S	0.032	0	0.081	0.106	0	0	0	0.095	0	0	0	0.048	0	0.046	0.044	0.078	0.031	0.029	0	0.093	0	0.058	0	0.062	0.084	0	0	0.048	0	0	0.049	0	0	0.099	0.057	0	0	0	0	0	0	0	0	0	0	0	0	0
gene10904	<NA>	0.259	0.154	0.496	0.808	0.709	1.401	0.537	0.502	0.331	0.37	0.526	0.477	0.629	0.753	0.358	0.297	0.432	0.439	0.548	0.192	1.295	0.776	1.171	1.457	1.009	1.255	0.68	0.786	0.676	0.708	0.685	0.581	0.766	0.811	0.5	0.345	0.844	0.554	0.324	0.365	0.606	0.382	0.458	0.312	0.176	0.381	0.567	0.164
gene10905	XB5796436.S [provisional:mgst3]	0.581	0.607	12.835	6.85	4.056	6.515	1.006	0.22	1.301	0	0	0.662	0	0.212	1.005	1.258	1.133	1.062	1.797	0.431	1.019	1.063	0.864	1.72	1.355	1.819	0.845	0.884	0.462	0.892	0.674	1.089	0.646	1.595	0.263	2.298	1.787	1.309	0.849	0.575	0	3.006	3.38	2.181	2.497	1.284	0.495	2.068
gene10906	recql5.L	25.794	25.204	24.322	24.056	19.897	17.878	19.473	19.281	15.237	16.752	20.575	21.507	23.292	23.16	21.572	22.94	22.405	20.476	22.691	19.857	15.337	14.958	15.587	15.92	12.461	14.191	16.417	16.452	15.636	16.772	16.786	17.634	17.591	19.716	16.858	19.989	21.027	18.033	23.395	15.073	20.236	22.46	22.4	23.678	21.214	22.541	20.94	20.689
gene10907	nrros.L	0.176	0.306	0.169	0.049	0.102	0.253	0.244	0.399	0.263	0.359	0.07	0.223	0.146	0.107	0.223	0.272	0.157	0.147	0.2	0.087	0.617	0.617	0.901	0.868	1.075	1.285	1.08	0.825	0.91	1.238	1.065	0.967	0.89	1.058	1.139	0.316	0.232	0.264	0.171	0.116	0.453	0.228	0.136	0.495	0.28	0.238	0.375	0.235
gene10908	<NA>	0	0	0	0	0	0	0	0	0	0	0	0	0	0	0	0	0	0	0	0	0	0	0	0	0	0	0.148	0	0	0	0	0.115	0	0.12	0.138	0	0.135	0.115	0	0	0	0	0	0	0	0	0	0
gene10909	ralgapa2.S	42.244	42.261	44.09	43.327	43.628	46.395	38.587	34.373	5.101	5.851	38.824	36.532	45.264	42.286	28.465	30.654	30.819	30.864	37.503	33.862	41.013	37.466	37.917	37.551	35.825	36.629	27.136	29.586	28.285	28.439	25.233	26.928	27.019	29.242	26.786	35.524	37.826	34.424	32.372	30.923	35.62	34.651	34.423	33.348	33.324	35.563	35.283	35.754
gene1091	XB5993457.L [provisional:aqp4]	0.179	0.062	0	0	0	0	0	0	0	0	0.095	0.091	0.17	0.261	0	0	0.175	0.055	0	0.089	0	0.328	0.118	0.118	0	0	0.232	0.091	0	0	0	0	0.177	0	0	0	0	0	0	0	0	0	0	0.112	0	0	0	0
gene10910	xpnpep1.L	25.802	25.219	30.311	30.06	21.22	13.833	19.05	18.578	12.358	13.053	20.54	18.154	18.368	19.523	24.339	24.376	29.634	22.351	28.965	36.912	17.398	18.057	18.717	16.424	15.342	17.898	19.635	17.25	18.255	18.33	17.794	19.458	21.59	19.744	20.806	28.518	27.204	23.437	26.039	20.651	21.985	31.007	33.771	35.844	34.501	32.526	32.057	33.222
gene10911	col14a1.L	0.013	0.042	0	0	1.692	1.719	0.019	0.102	1.9	1.979	0.021	0.082	0.076	0.039	0.615	0.533	0.578	0.8	1.183	1.439	0.024	0	0	0	0.018	0	0	0.061	0.043	0	0	0.02	0	0.042	0	0	0.071	0	0.21	0.053	0.026	0	0	0	0	0	0.046	0.024
gene10912	cd40lg.S	0	0	0.108	0.189	0	0	0	0	0	0	0	0	0	0.041	0	0.035	0	0	0.069	0	0	0	0.056	0	0.037	0.05	0	0	0	0	0	0	0	0	0	0.081	0.098	0	0	0	0	0	0	0	0	0	0	0
gene10913	<NA>	9.65	9.309	5.052	8.12	5.61	7.813	3.946	4.197	1.309	1.789	4.047	4.553	4.046	4.999	3.032	4.971	3.775	2.738	5.694	4.769	6.152	8.684	5.937	4.758	8.081	4.183	2.973	5.112	4.303	3.924	2.936	3.286	2.598	2.635	3.961	6.093	2.568	3.949	4.127	6.796	5.08	4.662	6.572	4.387	4.744	4.198	4.734	6.11
gene10914	itga7.L	0	0	0.024	0	0.065	0	0.026	0	0	0.042	0.059	0.028	0.027	0	0	0.046	0.036	0	0	0	0.033	0.034	0.111	0	0	0.033	0.109	0	0.06	0.143	0	0.028	0	0.029	0.101	0.027	0	0	0	0	0.036	0	0.029	0	0.107	0	0.032	0.033
gene10915	ccdc59.L	89.773	86.247	61.849	70.657	92.383	142.435	64.531	70.35	54.079	63.126	69.589	77.958	74.475	78.049	64.126	59.223	64.15	61.721	65.038	86.231	80.672	82.756	89.94	92.559	93.058	95.369	88.636	79.132	86.101	80.683	93.886	84.669	80.682	81.196	83.765	91.371	72.668	88.462	69.977	93.544	71.969	81.931	85.979	86.749	93.407	88.057	85.691	93.003
gene10916	<NA>	0.387	0.269	0.165	0	0	0.444	0	0.389	1.73	1.433	0.408	0.196	0	0.375	0	0.159	0.126	0.235	0	0	0.904	0.235	1.021	1.271	0.343	0.922	0	0	0	0	0.597	0.193	0.191	1.01	0.698	0	0	0.193	0.502	0.255	0.995	0.222	0.2	0	0.246	0	0	0
gene10917	slc5a3.L	0.165	0.234	0.242	0.318	0.206	0.285	0.196	0.339	0.158	0.21	0.373	0.215	0.201	0.378	0.538	0.452	0.264	0.345	0.409	0.682	0.145	0.173	0.21	0.326	0.189	0.253	0.663	0.502	0.695	0.579	0.602	0.389	0.664	0.481	0.448	0.492	0.767	0.584	0.322	0.303	0.547	0.915	1.244	0.863	0.878	1.112	1.287	0.902
gene10918	tlx3.L	0.183	0.191	0.117	0	0.319	0.158	1.266	0.829	1.125	0.712	0.795	0.417	0.195	0.2	0.695	0.791	0.045	0.042	0.735	0.949	0.721	0.836	0.272	2.435	0.852	1.88	0.266	0.278	0.873	0.351	0.424	0.274	1.015	0.573	0.413	0.46	0.562	0.137	0.89	0.271	2.118	0.473	0.85	0.686	0.96	0.471	0.623	0.163
gene10919	<NA>	0	0	0	0	0.196	0	0.078	0	0	0.499	0	0.256	0	0	0	0.208	0	0	0	0.25	0	0	0.222	0	0.224	0	0	0	0	0.086	0.087	0	0	0.264	0	0	0	0	0.109	0.111	0.108	0	0.435	0	0.107	0.083	0.096	0.2
gene1092	c1orf158.L	0.688	2.729	1.585	0.926	0.96	0	0	0	0	0.612	0	0	0	0	0.951	0	0.268	0.251	1.531	1.428	0	0	0	0	0	0.246	0.266	0	0	0	0	0	0	0	0	0	0	0	0	0	0	0	0.213	0.258	0	0	0.234	0
gene10920	<NA>	2.468	2.576	0.372	0.489	0	1.001	0.402	0	0.325	3.23	0.23	0.221	0.206	0.634	0	0.359	0.141	0	0.359	0.646	1.782	0.796	1.15	1.145	1.74	2.077	0	0.441	1.155	0.891	1.121	0.218	0.215	0.683	1.049	0	0	0	0.283	0.287	0.841	2.752	2.475	1.361	2.217	2.565	0.99	1.807
gene10921	lif.S	0.08	0.125	0	0	0.139	0.138	0.055	0.181	0	0.178	0.316	0.121	0	0	0.774	0.84	0	0	0	0.059	0.14	0.365	0.079	1.025	0.266	0.858	0.31	0.304	0.254	0.123	0.062	0	0.059	0.063	0.144	0	0	0	1.09	0.395	0.077	0	0	0	0	0	0.068	0
gene10922	<NA>	0	0	0	0	0	0	0.087	0.047	1.334	0.837	0.05	0.095	0	0	0.13	0.271	0	0	0	0	0	0.057	0	0	0.084	0.056	0.121	0.095	0.15	0	0	0.047	0.093	0	0	0	0	0	0.061	0	0	0	0.049	0	0.06	0	0	0
gene10923	zbtb1.L	3.841	4.209	3.768	3.447	3.684	4.193	3.322	1.982	1.719	2.421	2.581	2.528	2.679	3.399	2.655	3.007	2.463	2.924	2.888	2.705	2.469	3.626	3.36	3.408	2.557	3.204	1.859	2.432	1.731	1.62	1.681	2.445	2.179	2.257	1.965	2.713	3.035	2.305	1.931	2.848	1.977	3.53	2.282	2.941	3.359	2.356	3.763	3.073
gene10924	bmpr1b.L	4.564	4.238	7.501	6.307	0.335	0.248	3.824	3.702	1.559	2.298	3.837	3.722	4.363	3.495	2.491	2.94	2.177	2.129	2.228	2.956	0.042	0.176	0	0.047	0.16	0.129	0.977	0.694	1.567	1.142	0.928	0.468	0.818	0.565	1.171	0.863	0.97	0.505	4.116	3.659	4.034	1.739	1.899	1.261	1.696	1.698	1.269	1.068
gene10925	epb42.S	0.035	0.012	0	0	0.041	0	0.064	0.07	0.26	0.594	0.11	0.071	0.033	0.017	0.016	0	0	0.032	0	0	0.041	0.149	0.161	0.046	0.046	0.021	0.292	0.336	0.222	0.303	0.431	0.4	0.172	0.091	0.084	0.05	0.082	0.017	0.045	0.069	0.045	0.04	0.036	0	0	0	0	0
gene10926	<NA>	0.105	0.328	0.134	0.088	0	0	0.145	0.158	0.117	0.058	0.207	0.398	0.111	0	0	0.162	0	0.048	0.097	0.039	0.138	0.287	0.363	0.206	0.209	0	0.051	0.04	0	0.201	0	0.039	0.078	0.205	0.095	0.038	0	0	0.051	0.052	0.303	0.541	1.055	1.031	1.049	0.886	1.249	0.977
gene10927	XB5832479.L [provisional:cdc25c]	0	0	0	0	0.179	0	0	0	0.345	0	0.081	0	0	0	0	0.063	0.05	0	0	0	0.09	0	0	0	0.137	0.092	0.099	0	0	0.079	0	0	0	0	0	0	0	0	0.1	0.102	0	0	0	0	0	0	0	0
gene10928	crhr2.S	0.024	0.025	0.123	0	0	0	0.267	0.146	0	0.161	0.076	0.073	0.034	0	0.067	0	0.047	0.088	0	0.036	0.042	0.044	0.095	0	0.128	0.043	0.187	0.073	0.115	0.037	0.037	0.072	0.036	0.076	0	0.035	0	0.217	0.047	0	0.14	0.208	0.299	0.045	0.138	0.177	0.205	0.129
gene10929	aph1a.S	77.904	75.394	85.938	80.331	72.753	57.309	79	72.913	68.054	66.094	79.757	71.709	76.13	77.091	59.66	61.651	63.108	63.722	65.766	55.625	46.139	44.451	42.842	40.171	39.569	37.106	53.472	52.827	50.433	63.337	63.786	63.917	75.385	76.068	67.187	69.494	82.668	69.004	74.739	54.197	65.723	68.455	66.825	72.782	69.327	67.862	67.21	71.008
gene1093	<NA>	18.655	18.511	27.972	24.346	24.567	13.344	17.696	14.38	6.886	7.904	14.551	13.59	16.162	15.741	17.809	16.63	23.335	17.652	19.22	26.86	20.691	21.859	22.436	16.644	17.746	19.798	15.114	14.468	15.694	12.992	14.554	15.496	16.392	18.098	16.617	21.289	24.739	19.947	17.232	14.307	14.329	33.189	35.01	37.839	36.934	35.828	33.249	33.004
gene10930	mthfs.L	49.101	44.858	31.339	39.63	40.248	51.553	19.882	24.016	3.689	7.334	18.622	20.925	24.06	20.558	25.07	19.359	23.63	24.204	29.988	26.536	39.221	46.48	47.347	41.104	41.241	39.369	29.414	33.65	30.153	28.352	30.009	30.696	25.102	22.327	28.708	32.652	34.741	38.164	25.673	29.576	23.181	37.743	33.031	28.705	32.134	30.685	32.906	33.082
gene10931	cyp26c1.L	0	0.033	0.02	0.053	0	0	0.108	0.142	2.452	2.089	0.124	0.119	0.067	0.023	0.108	0.019	0	0.072	0.348	0.371	0.467	0.114	0.62	0.185	0.25	0.392	0.061	0	0.075	0	0	0.023	0.023	0	0.085	0	0.082	0.023	0.122	0.062	0.121	0.243	0.412	0.528	0.329	0.023	0.027	0.084
gene10932	tmem178.2.L	12.806	13.522	30.433	25.384	22.139	15.961	12.609	10.605	5.514	4.817	12.459	12.646	12.503	12.06	17.035	16.801	20.223	18.624	19.433	25.187	21.666	20.538	21.891	19.219	21.828	21.362	11.134	10.897	9.086	10.651	10.669	10.349	13.874	10.59	10.317	14.27	13.245	10.309	15.482	11.224	14.052	18.016	22.163	18.834	24.867	21.219	18.578	19.519
gene10933	zkscan8.L	6.324	7.102	6.174	6.081	8.984	10.338	4.576	4.937	9.678	10.433	4.773	4.759	4.855	5.398	5.528	4.111	4.401	6.146	6.369	5.472	7.818	7.412	8.834	6.71	7.526	8.695	4.578	3.915	4.158	4.599	3.682	3.571	3.728	3.313	3.541	3.563	4.051	3.605	4.64	5.056	3.97	6.095	5.362	6.777	5.759	6.622	6.06	5.64
gene10934	nodal5.L	0	0	0	0	0	0	2.648	2.313	0.599	0.681	2.421	1.511	0	0	6.825	5.772	0	0	1.277	0.908	3.757	5.665	3.487	5.359	4.23	5.405	5.336	3.839	5.052	4.872	5.793	6.078	6.459	6.117	6.22	0.165	0.605	0.23	2.384	1.968	1.994	0	0.356	0.072	0.146	0.394	0	0.068
gene10935	pla2g7.L	5.502	6.158	8.523	7.127	3.725	3.744	5.711	5.578	5.792	6.16	6.011	4.838	7.088	5.135	4.955	5.37	4.972	5.225	5.303	4.669	5.077	3.771	3.191	4.533	3.013	4.401	2.488	2.944	3.512	3.137	2.516	3.362	4.019	3.262	3.661	2.991	3.433	2.526	5.25	4.797	5.24	5.365	6.255	5.329	5.63	5.223	5.922	5.986
gene10936	<NA>	45.263	46.927	40.531	39.458	45.119	48.291	44	48.981	44.175	45.573	45.929	46.518	29.501	34.047	42.955	44.17	32.56	32.26	44.808	51.179	44.089	45.491	49.261	47.209	53.884	48.424	42.472	45.244	40.335	52.834	49.68	48.085	45.513	53.29	49.712	42.464	52.517	46.026	45.419	46.097	42.286	45.429	45.19	47.772	44.836	44.817	46.905	40.907
gene10937	atp6v1g1.S	84.457	94.272	71.047	89.925	87.283	65.601	71.793	73.25	50.455	39.139	76.06	77.009	81.56	86.281	67.754	68.315	76.817	78.826	75.572	97.78	63.75	71.456	70.48	61.178	79.148	66.182	80.513	71.72	76.289	80.557	82.739	73.813	78.725	68.831	72.028	76.968	70.5	82.336	84.237	104.399	70.435	105.568	111.302	92.143	113.421	100.553	102.163	99.427
gene10938	armc1.S	95.877	99.177	97.825	102.141	108.487	100.286	95.359	96.035	58.337	55.865	94.48	96.168	101.625	94.241	77.794	77.211	78.644	82.396	88.853	100.215	89.822	82.135	86.832	80.798	87.333	86.027	92.296	97.238	92.78	95.483	86.055	89.355	79.874	83.523	92.348	97.769	95.46	101.802	92.98	93.269	77.322	89.424	92.668	91.642	83.754	93.738	92.794	89.675
gene10939	tex26.L	11.249	14.397	2.417	1.382	5.155	4.246	1.023	0.868	0.184	0.731	1.688	0.998	1.631	0.956	2.611	4.365	3.999	3.376	5.685	4.261	0.72	1.2	0.976	0.81	1.531	1.028	2.544	3.994	2.351	2.77	4.058	2.583	2.553	3.474	1.335	4.955	3.749	3.203	0.639	1.137	0.475	3.255	2.672	2.618	2.977	2.297	4.337	3.066
gene1094	itpa.S	78.39	77.885	72.159	87.943	58.923	49.021	45.415	47.923	44.057	35.415	44.784	45.042	48.115	52.163	54.609	53.035	54.818	58.181	65.661	68.833	59.232	71.74	75.351	65.916	72.833	61.278	46.364	53.021	53.16	58.156	61.196	46.614	45.521	48.566	44.557	55.181	46.103	61.093	54.416	62.256	51.136	58.645	54.436	55.153	56.592	61.018	61.715	58.567
gene10940	ttc19.S	10.43	10.83	10.882	11.521	8.582	11.432	9.179	11.717	9.096	8.328	10.404	12.105	12.068	13.774	9.244	8.199	12.453	10.213	9.588	10.151	13.878	13.978	14.939	16.14	16.668	15.779	11.911	11.301	10.975	13.043	11.07	9.616	10.69	12.74	11.881	11.297	14.09	10.835	11.037	12.165	12.388	11.061	13.844	16.75	15.617	15.514	16.223	13.981
gene10941	<NA>	0	0	0	0	0	0	0	0	0	0	0	0	0	0.052	0	0.089	0	0	0	0.053	0	0	0	0	0	0	0	0	0.115	0	0	0	0.053	0	0	0	0	0	0	0	0	0	0	0	0.069	0	0	0
gene10942	psmb5.L	60.611	62.496	61.9	66.168	57.76	48.934	47.871	47.08	39.977	34.478	48.251	59.227	49.196	58.276	44.775	40.943	55.152	52.467	57.89	82.366	39.615	42.936	40.074	33.947	41.282	35.589	35.702	34.845	35.033	37.659	37.044	33.489	53.138	47.683	51.564	58.84	58.596	59.246	56.853	47.918	57.468	43.863	55.883	49.411	55.578	53.328	52.962	61.506
gene10943	<NA>	0	0	0	0	0	0	0	0	0.487	1.21	0	0.165	0	0	0.15	0	0	0	0	0	0	0	0	0	0	0.389	0.211	0.827	0	0.334	0.84	0.163	2.417	0.682	0.393	0	0	0	0	0	0.63	0	0	0	0	0	0	0
gene10944	adgrl2.L	63.614	62.837	67.853	70.426	59.845	58.842	66.199	60.961	42.908	44.163	67.541	62.4	69.62	66.708	66.179	67.428	68.025	68.312	73.327	66.946	68.173	64.931	64.26	60.671	60.678	60.685	59.917	62.476	62.533	65.581	57.277	62.46	67.401	63.848	59.007	59.823	68.01	63.708	58.982	49.966	58.822	63.507	62.62	68.569	60.377	63.772	62.612	64.545
gene10945	<NA>	0.056	0.078	0.024	0.125	0.065	0.257	0.129	0.056	0	0.083	0.118	0.028	0.053	0.027	0.026	0.023	0.018	0.034	0.069	0.11	0.163	0.102	0.221	0	0.099	0.067	0.072	0.254	0.089	0.086	0.057	0.111	0.028	0	0	0.053	0.163	0.167	0.109	0.037	0	0	0	0.035	0.106	0	0.032	0.265
gene10946	tnfsf13b.L	0.047	0	0	0.159	0.329	0	0.718	0.356	0	0	0.373	0.645	0.134	0	0.196	0.874	0.092	0	0	0.07	0.165	0	0.28	0.279	0	0.084	0.274	0.215	0.45	0.072	0.073	0.141	0	0	0.085	0	0	0	0	0.093	0.091	0	0	0	0	0	0.08	0
gene10947	bbox1.S	5.162	4.874	0.157	0.276	5.001	3.531	0.34	0.309	0.733	1.458	0.324	0.311	0.349	0.477	2.039	1.317	0.559	1.572	1.469	1.518	1.005	0.449	0.243	0.485	0.546	0.293	0.317	0.125	0.195	0.44	0.127	0	0.243	0.257	0.37	0.059	0.576	0.43	0.239	0.729	0.237	1.271	0.952	0.999	1.173	1.508	0.768	0.801
gene10948	<NA>	0.029	0.06	0.037	0	0	0	0.08	0.131	2.707	2.563	0.046	0.044	0	0.042	0.159	0.036	0	0.158	0.249	0.085	0.202	0.053	0.228	0.568	0.307	0.566	0	0	0.137	0.53	0.133	0.173	0.298	0.496	0.208	0	0	0	0.056	0.057	0	0.248	0.268	0.216	0.055	0.042	0.098	0
gene10949	tmem121.L	0.035	0.074	0.045	0	0	0	0	0	0	0	0.056	0	0	0.103	0	0	0	0	0	0	0	0	0	0	0.047	0	0	0	0	0	0	0	0	0	0	0	0	0	0	0	0	0.061	0	0.066	0	0	0	0.189
gene1095	wdr47.L	65.582	67.684	74.012	63.811	61.006	62.245	48.414	48.281	18.083	16.908	53.222	50.085	54.729	53.238	51.41	55.469	60.531	58.444	65.115	63.93	59.642	58.351	55.522	54.39	51.063	55.826	45.087	45.443	44.269	41.516	41.985	43.139	43.839	45.165	46.029	54.809	52.948	54.525	54.621	46.552	55.026	62.33	62.23	65.333	61.743	64.982	63.653	60.646
gene10950	ppp1r2.S	10.63	10.188	6.307	7.481	10.112	12.66	7.891	7.836	6.56	8.097	8.202	7.486	6.902	8.764	5.923	5.057	5.304	6.092	8.602	7.642	15.474	16.366	17.547	18.297	18.104	16.3	10.106	11.165	9.889	8.695	9.205	9.122	10.826	9.238	8.203	10.599	9.504	9.813	5.707	6.69	6.839	6.939	6.041	5.799	6.701	6.735	7.63	7.046
gene10951	skap2.S	0.102	0.319	0	0	0	0	0	0.077	0	0.567	0	0	0.072	0	0	0.063	0	0.047	0	0.076	0	0	0.404	0	0.34	0	0	0.155	0.162	0.078	0.079	0.229	0	0.08	0	0	0.179	0	0.099	0.101	0.098	0.088	0.079	0.191	0	0	0.087	0.091
gene10952	cyct.L	12.096	11.444	6.427	7.142	7.155	11.461	8.713	8.122	2.216	4.406	10.068	9.777	10.539	9.365	8.313	5.946	7.236	8.53	11.019	9.334	8.681	10.083	9.388	8.789	6.877	6.071	8.082	8.71	9.226	8.462	6.118	7.313	7.435	7.427	6.004	8.741	8.945	9.341	8.262	12.032	8.055	6.827	6.688	8.224	7.965	7.29	8.558	7.044
gene10953	spred1.L	0.863	1.101	7.979	7.426	2.51	1.984	1.195	1.087	28.765	25.927	1.062	1.603	0.953	1.117	1.26	0.83	1.589	0.701	0.771	2.205	0.505	0.438	0.76	0.946	0.703	0.943	0.557	0.583	0.992	0.809	2.074	1.15	1.065	0.977	1.299	0.62	0.842	0.576	0.654	1.897	1.759	5.952	7.657	7.736	5.126	5.155	5.64	6.312
gene10954	ldb3.S	0	0	0	0	0	0.059	0.048	0.104	0.192	0.076	0.027	0.052	0	0	0.024	0.042	0	0	0.021	0	0	0.063	0	0	0	0	0.033	0.052	0.055	0	0	0	0	0	0	0	0	0	0.033	0.102	0	0.059	0.027	0.032	0.098	0	0	0
gene10955	clba1.S	94.669	87.578	88.585	86.249	68.34	87.488	69.902	74.52	22.687	17.849	67.58	73.408	67.873	83.619	31.389	32.372	29.449	35.402	45.985	24.346	74.696	68.43	76.512	70.415	66.516	66.616	53.721	52.003	52.237	52.086	50.438	56.66	53.132	47.957	48.079	58.806	69.912	62.72	63.207	64.216	68.669	22.725	17.063	20.529	20.654	23.078	22.258	20.462
gene10956	mcam.S	0.195	0.068	0.083	0.109	0	0	0	0	0	0	0.051	0	0	0	0	0	0.063	0	0.04	0.048	0	0	0.064	0	0	0	0	0.049	0	0.1	0.05	0	0	0	0.117	0	0.057	0	0.063	0	0	0	0	0.061	0	0.096	0	0
gene10957	fam163b.S	0.123	0.32	0.157	0	0.214	0	0.764	0.741	0.412	0	0.194	0.745	1.914	0.178	0.254	0.227	0.239	0	0.303	0.273	0.215	0.56	0.243	0.847	0.245	0.877	0	0	0	0.094	0	0	0.091	0.192	0	0	0.108	0	0.239	0.121	0.473	0.106	0	0.115	0.585	0	0	0
gene10958	ano10.L	19.317	18.213	18.607	19.885	14.201	17.783	19.447	20.581	11.44	10.623	21.787	23.737	20.677	23.049	15.597	15.649	13.331	18.403	18.261	12.459	14.276	15.693	16.039	17.026	16.715	15.6	17.844	17.497	17.481	17.184	17.519	17.291	17.245	16.455	16.365	16.209	16.371	16.284	18.981	20.586	20	14.139	12.905	11.625	11.772	13.77	13.433	12.902
gene10959	pin1.S	40.534	39.311	31.212	33.804	52.409	53.861	31.994	30.409	38.439	36.616	27.293	26.213	32.237	32.009	27.938	24.635	33.159	29.385	28.136	38.824	48.981	59.436	60.474	56.911	58.173	52.734	39.054	38.532	37.149	38.816	35.275	39.531	38.707	44.408	38.726	40.43	37.798	37.857	29.251	30.585	26.847	40.869	47.379	45.816	48.603	48.295	46.251	53.226
gene1096	<NA>	0	0	0	0	0	0	0	0	0.118	0	0	0	0	0	0.073	0	0.103	0.096	0	0	0	0	0	0.624	0	0	0	0	0	0	0	0	0	0	0	0	0	0	0.205	0	0.102	0	0	0	0	0	0	0
gene10960	lmx1b.2.L	0	0	0	0	0	0	0	0	0	0	0	0	0	0	0	0	0	0	0	0	0	0	0	0	0	0	0	0	0	0	0	0	0	0	0	0	0	0	0	0	0	0	0	0	0	0	0	0
gene10961	ankrd11.L	80.823	82.026	69.069	70.303	76.775	106.041	79.057	75.065	82.294	86.304	78.671	78.304	90.196	86.53	70.099	67.53	66.898	75.006	76.436	64.675	79.562	78.832	74.791	75.656	69.033	75.224	59.519	65.158	65.396	69.041	55.343	68.1	66.311	66.839	56.811	65.971	71.024	65.526	59.051	57.983	69.11	63.277	56.192	57.881	54.708	54.043	55.275	58.291
gene10962	nop2.L	84.258	85.931	62.725	58.639	78.453	91.08	68.634	63.109	88.919	92.84	68.039	63.99	67.278	69.138	60.813	61.79	64.936	58.809	62.898	76.808	84.874	82.733	80.833	75.413	73.696	83.305	61.325	56.713	53.948	58.973	49.686	51.512	54.811	54.83	54.549	65.919	64.959	69.913	50.529	65.034	65.738	87.247	91.024	92.326	85.509	96.143	84.686	86.342
gene10963	xlcgf26.1l.L	0.907	0.812	1.437	0.945	1.959	2.011	1.525	1.403	0.918	0.481	0.854	1.345	1.625	1.54	0.986	1.335	1.179	1.105	1.229	1.73	3.068	2.171	2.739	2.215	2.244	1.815	0.837	1.182	1.168	1.458	0.5	1.392	1.119	1.523	0.858	1.583	1.48	1.102	1.304	1.196	1.293	2.271	2.377	2.431	2.35	2.163	2.135	2.535
gene10964	nrg1.L	0.612	0.462	1.132	2.29	1.029	1.525	1.02	1.388	1.345	1.161	0.538	0.879	1.223	1.023	0.267	0.182	0.254	0.332	0.771	0.387	0.119	0.041	0.067	0.224	0.121	0.264	0.923	0.241	0.451	0.139	0.158	0.153	0.285	0.409	0.389	0.244	0.279	0.562	1.59	0.606	0.701	0.997	0.914	1.319	1.147	1.102	0.908	1.089
gene10965	rnft2.S	2.392	1.859	0.476	0.626	0.464	0.641	1.545	2.088	1.071	0.828	1.345	1.736	1.81	1.586	0.772	1.084	1.165	1.19	1.084	0.946	1.072	1.069	1.685	0.681	0.885	0.903	2.522	2.182	1.776	3.017	2.504	2.867	2.125	2.458	1.968	2.024	1.867	2.951	1.501	1.525	1.642	0.962	0.824	0.847	0.558	0.744	0.589	1.323
gene10966	ndc80.S	90.174	88.437	86.891	78.646	95.262	79.696	65.303	64.119	115.303	105.735	62.461	61.505	71.771	69.303	66.477	71.661	89.256	71.936	78.704	108.304	76.242	77.013	72.298	73.461	73.409	75.436	62.364	66.563	61.945	57.893	64.087	64.259	64.9	70.733	67.54	95.344	94.791	80.092	75.33	77.52	76.612	130.62	137.435	143.35	151.601	137.691	138.003	138.418
gene10967	<NA>	0.909	1.265	1.163	0.51	0.792	0.914	0.943	0.858	0.762	0.842	1.317	1.323	1.182	1.377	0.471	0.655	0.369	0.484	1.311	1.403	0.597	0.554	0.45	0.448	0.555	0.474	1.173	1.324	0.964	0.639	0.994	1.305	1.681	0.831	0.957	0.979	0.931	0.852	1.843	1.273	1.169	3.197	3.697	2.485	2.818	3.4	3.548	3.03
gene10968	arsd.L	12.187	12.406	7.316	5.908	4.023	5.187	9.509	12.426	7.631	6.917	12.77	13.711	9.109	14.01	3.328	2.17	1.563	4.673	4.774	4.908	0.352	0.458	0.199	0.198	0.534	0.359	9.615	10.368	10.928	10.922	10.148	10.67	10.543	6.837	10.054	8.935	10.921	10.611	11.032	11.506	11.712	10.544	12.825	9.687	11.198	12.257	9.144	11.861
gene10969	tbc1d23.S	25.713	26.106	25.662	23.173	21.395	17.953	27.998	28.899	14.174	13.032	27.479	26.924	28.35	29.761	25.407	28.505	28.268	27.219	31.108	28.583	21.025	21.276	21.176	20.689	19.338	20.055	24.387	22.911	22.5	23.5	20.38	21.681	23.129	24.639	22.789	25.829	28.624	24.683	26.563	25.303	27.495	28.65	27.589	30.33	25.228	27.352	27.39	28.004
gene1097	pgr.S	0	0.023	4.617	7.608	0.303	0.15	0.842	1.905	0	0	1.306	1.089	0.771	1.138	0	0.107	0.021	0.099	0.027	0.032	0.038	0	0.086	0	0.087	0	0	0.033	0	0.033	0	0	0	0	0	0.062	0	0	0.592	0.989	0.671	0.075	0.067	0.041	0	0.16	0.074	0
gene10970	XB984297.L [provisional:cyp27a1]	0.106	0.277	0.136	0	0	0	0	0	0	0	0	0	0	0	0.073	0.197	0.31	0.29	0.066	0.236	0	0	0	0	0.212	0	0.308	0.483	0.253	0.325	0.246	0.318	0.078	0.498	0.191	0.381	0.651	0.08	0.206	0	0	0	0	0.199	0.404	0.078	0.361	0.188
gene10971	sntb1.S	0.08	0.111	0.818	0.987	0.372	0.276	0.074	0.121	0.716	0.296	0.169	0.081	0.189	0.078	0.884	1.219	0.857	0.755	1.054	1.067	0	0.097	0	0.158	0.106	0.095	0.052	0.081	0.085	0.163	0.247	0.16	0.237	0.042	0.481	0.038	0.094	0.16	0.259	0.053	0.154	3.536	3.387	3.348	2.746	3.335	3.633	3.033
gene10972	snx5.L	42.602	44.933	39.594	42.26	29.272	32.686	42.027	43.457	24.513	22.658	40.222	42.036	41.543	47.442	36.846	37.221	36.572	40.325	43.165	39.988	37.736	40.157	41.242	35.63	41.804	38.486	39.822	40.413	44.427	43.035	42.944	43.384	36.703	38.149	37.255	45.564	43.878	45.469	40.033	43.839	40.308	37.316	39.715	35.92	35.699	37.823	39.408	41.238
gene10973	fgg.S	0	0	0	0	0	0	0	0	0	0.15	0	0	0	0	0	0	0	0	0	0	0	0	0	0	0.09	0	0	0	0	0.207	0.209	0.304	0.1	0.106	0.122	0	0	0	0	0	0	0.116	0	0.253	0	0	0	0
gene10974	<NA>	45.158	46.814	40.869	46.547	14.392	18.702	23.794	22.972	9.746	8.328	22.597	25.069	25.154	26.57	25.459	21.631	20.396	24.432	27.678	21.638	22.103	26.392	27.698	26.221	30.425	20.083	18.496	19.629	19.324	18.633	17.231	14.768	14.479	16.524	19.043	21.518	21.471	22.816	27.369	26.597	22.858	23.307	19.895	24.359	19.248	19.012	22.004	18.207
gene10975	zswim4.L	101.499	103.701	117.523	93.288	133.805	85.975	112.772	119.26	253.629	252.965	123.389	119.649	91.127	85.692	133.361	139.563	132.304	98.408	114.886	173.741	130.256	123.646	111.021	114.255	117.261	124.971	108.719	112.333	106.94	111.532	116.033	126.348	108.147	121.378	106.071	113.082	98.06	92.936	130.978	125.104	130.402	186.485	197.968	204.865	217.205	192.468	200.605	204.44
gene10976	<NA>	42.563	42.94	41.489	52.292	39.436	52.557	52.396	56.149	30.931	37.076	53.354	57.17	50.511	62.775	55.114	54.42	45.55	56.078	57.986	44.99	32.546	32.193	32.438	34.671	36.719	34.562	40.54	41.969	37.417	39.268	43.377	41.42	44.491	38.465	41.036	36.892	39.072	44.001	49.416	53.307	55.399	38.152	34.707	36.317	33.549	38.233	37.227	34.762
gene10977	c1orf74.L	13.761	16.565	9.509	12.659	13.439	20.241	12.951	12.89	4.311	5.51	12.913	13.656	13.278	14.816	10.781	13.269	10.099	14.583	11.909	11.562	13.51	13.245	16.9	18.274	16.249	15.583	13.679	16.037	15.176	15.759	11.053	15.257	14.668	15.958	12.758	16.477	12.245	18.171	14.466	14.153	14.165	18.656	18.2	14.967	14.356	16.209	18.916	13.703
gene10978	dennd6b.L	0.022	0.091	0.028	0.074	0.076	0	0.03	0.033	0.049	0	0.069	0.033	0.062	0.032	0.091	0.027	0	0.02	0	0.032	0.23	0.12	0	0.086	0.116	0.117	0.085	0.1	0	0	0.034	0.033	0	0	0	0	0	0.033	0.085	0	0.042	0	0	0.041	0.042	0	0	0
gene10979	pa2g4.L	55.8	55.811	58.386	63.887	38.726	49.141	45.058	41.123	26.928	28.123	42.142	45.642	41.318	45.856	34.711	36.925	34.821	38.119	51.053	46.358	41.378	34.886	39.019	35.389	38.062	38.166	35.996	33.809	36.914	39.165	35.128	36.059	37.063	38.053	38.033	50.277	51.2	48.852	43.716	45.76	38.641	55.242	49.347	52.588	49.69	49.252	49.617	49.485
gene1098	<NA>	28.07	26.986	28.522	24.234	27.101	24.047	19.152	18.803	21.037	20.349	19.55	18.327	22.2	20.727	20.581	22.679	25.907	22.009	24.141	27.711	22.584	20.342	21.686	20.58	19.815	20.518	20.084	19.208	19.528	18.107	17.942	20.196	20.539	21.002	18.617	23.055	23.006	20.691	23.9	18.983	21.375	32.876	34.383	34.191	35.748	34.154	34.053	33.322
gene10980	gpr68.S	0.056	0.058	0.072	0	0	0	0	0	0	0	0	0	0	0	0	0	0	0	0	0	0	0	0	0	0	0	0	0	0	0	0	0	0	0	0	0	0	0	0	0	0	0	0	0	0	0	0	0
gene10981	accs.L	4.582	5.188	5.391	3.921	4.402	2.677	4.38	4.4	4.301	4.535	3.009	4.217	4.518	4.802	4.053	4.728	5.012	4.399	4.321	5.153	2.417	3.335	3	3.063	2.689	3.263	4.249	3.365	3.829	3.425	3.059	4.073	3.794	3.743	3.927	4.854	4.774	4.079	5.783	4.032	5.771	5.253	5.898	5.352	6.114	5.403	5.856	6.008
gene10982	spats2.L	47.403	48.435	53.562	49.667	44.238	43.793	49.57	48.959	26.462	28.524	47.276	46.465	53.483	47.874	49.16	52.51	53.425	52.616	57.568	43.76	36.115	34.549	34.051	33.824	31.125	35.478	42.209	45.077	44.248	45.694	39.427	42.068	44.226	48.314	47.144	49.456	57.227	48.956	39.132	37.193	45.187	46.087	40.644	42.969	40.189	44.894	40.337	41.88
gene10983	rdh5.L	0.903	1.006	0.925	0.608	0.63	0.623	1.667	1.729	0	0	1.619	1.829	0.684	1.489	0.749	1.191	0.821	2.146	0.968	1.339	0	0.22	0	0.119	0.16	0.108	0	1.007	0.479	0.831	0.093	0.361	0.535	0.661	1.088	0.087	0.74	0.271	1.524	1.191	1.511	0.519	0.187	0.565	0.46	0.532	0.513	0.642
gene10984	tpgs1.L	13.505	13.857	17.883	16.343	15.951	17.992	17.369	15.607	1.445	1.616	17.316	16.14	18.151	17.28	11.232	10.476	11.806	13.051	14.551	11.328	15.092	14.626	13.269	12.309	11.643	13.805	11.956	13.229	12.644	14.895	11.261	13.079	12.924	12.373	11.806	12.833	13.465	13.927	16.444	13.993	14.33	14.534	11.925	13.318	13.194	14.002	13.363	13.873
gene10985	<NA>	0	0	0	0	0	0	0	0	0	0	0	0	0	0	0	0	0	0	0	0	0.055	0.058	0	0.498	0	0	0	0	0	0.242	0	0.426	0.187	0.544	0.285	0	0	0	0	0.062	0.122	0	0	0	0	0	0	0
gene10986	pmpcb.L	31.779	28.394	23.883	30.793	26.594	18.504	19.754	17.325	11.875	11.262	19.1	17.973	17.743	22.541	21.42	22.696	23.293	24.686	25.941	35.541	24.274	29.54	30.326	27.548	29.405	25.847	18.899	24.385	24.546	18.148	20.821	22.847	18.873	18.544	19.718	26.205	26.673	25.81	21.967	19.664	15.893	23.757	26.186	24.363	24.794	24.248	26.4	22.452
gene10987	msx1.L	0	0	0	0	0	0	0.919	1.706	90.97	90.579	0.945	0.706	0.094	0	0.367	0.411	0	0.061	9.116	12.606	0.233	0.728	0.263	0.262	0.531	0.594	0.257	0.202	0.211	0.713	0.821	0.597	3.442	1.561	1.56	2.672	4.783	2.392	0.647	0.526	2.051	3.549	5.868	3.488	3.93	2.347	2.717	2.008
gene10988	chpf2.S	1.968	2.207	3.532	3.657	3.893	2.632	1.057	0.976	1.183	1.111	1.068	1.294	1.042	0.983	1.827	1.997	3.061	2.334	2.251	3.135	1.545	1.288	1.28	1.448	1.369	1.943	2.161	1.518	1.728	1.667	1.633	1.716	2.826	2.715	2.015	2.405	2.424	2.38	0.915	0.987	2.267	3.138	2.777	3.415	2.914	3.762	3.003	4.126
gene10989	<NA>	0.489	0.255	0	0	0	0	0	0.369	0	0	0.386	0.371	0.347	0	0	0	0.238	0	0	0	0	0.893	0	0.482	0.651	0.437	0	0.743	0	0.375	1.132	0.366	0	0.383	0.441	0.351	0	0.367	0	0	0.943	0	0	0	0	0	0	0
gene1099	<NA>	0.602	0.407	0	0	0	0	0	0.107	0	0	0.056	0.054	0.151	0.052	0	0	0	0	0.044	0	0.062	0	0.07	0	0	0.063	0	0.054	0	0.054	0	0	0	0	0	0	0.062	0	0.069	0	0	0	0	0.066	0	0	0	0
gene10990	<NA>	0	0	0	0.104	0	0	0	0	0	0	0	0.047	0	0	0.128	0.076	0	0	0.038	0	0	0	0	0	0	0	0	0	0	0	0.095	0	0	0	0	0	0.054	0	0	0	0	0	0	0	0	0	0	0.055
gene10991	<NA>	0.055	0.057	0.07	0	0	0	0	0	0	0	0	0	0.078	0.08	0	0	0.053	0	0.136	0.163	0	0	0	0	0.146	0	0	0	0	0	0	0	0	0	0	0	0	0	0	0	0	0.095	0.17	0.103	0	0.081	0.093	0
gene10992	pcca.L	37.424	37.774	44.805	51.475	28.822	30.322	30.472	31.571	23.506	22.182	31.143	29.74	29.294	35.09	34.158	32.689	33.729	39.538	39.202	42.196	42.921	43.974	47.274	43.81	49.204	41.62	36.778	34.873	35.599	37.376	37.036	34.204	37.862	38.673	38.043	41.777	41.668	42.831	29.665	33.407	28.221	38.281	36.989	36.035	33.892	37.984	35.513	35.166
gene10993	c5orf15.S	3.661	3.516	4.961	4.919	4.293	4.826	4.684	4.648	8.399	8.452	4.574	4.65	4.388	4.588	4.147	4.412	3.252	3.612	4.07	2.577	5.016	4.442	3.809	6.857	5.798	5.776	4.617	3.414	4.135	7.22	6.701	5.624	7.424	5.882	6.223	3.028	3.62	3.116	3.983	3.681	5.998	3.844	3.195	3.519	3.083	3.08	3.513	3.611
gene10994	slc47a2.S	0.055	0.057	0.105	0.092	0.096	0.095	0	0	0.061	0	0.043	0.083	0	0.04	0	0	0	0.05	0.17	0	0.048	0.1	0	0.325	0	0	0.053	0.125	0	0	0.042	0	0	0.043	0	0	0	0	0.053	0	0.053	0	0	0	0.105	0	0.047	0
gene10995	gip.S	15.388	14.722	138.063	162.764	41.531	56.205	9.381	7.749	3.279	2.852	2.607	7.234	7.018	9.595	22.794	21.966	21.593	23.764	26.95	14.123	8.35	7.365	11.249	9.393	7.563	8.188	47.18	43.161	37.878	48.885	50.081	35.405	44.476	35.883	35.73	38.691	41.823	40.407	9.628	9.058	6.718	4.42	4.826	3.779	1.748	3.236	5.931	3.583
gene10996	frrs1.L	41.418	40.956	28.213	33.784	24.437	22.833	42.412	41.093	15.677	14.733	42.784	43.102	40.601	48.354	39.64	38.537	42.729	46.068	52.188	51.632	39.531	42.607	41.341	37.911	39.202	36.159	40.872	41.615	37.317	39.639	40.012	38.106	40.006	35.151	35.247	42.381	46.114	44.613	40.859	42.326	37.327	40.787	41.7	41.18	41.459	43.428	41.283	39.468
gene10997	dazap1.L	77.888	76.459	84.463	75.956	78.876	67.365	69.453	68.746	84.681	90.709	77.332	70.927	89.498	73.812	65.131	69.237	78.826	67.847	67.825	83.312	84.92	90.451	90.497	87.843	84.116	86.361	67.42	66.38	65.372	64.793	71.417	69.343	69.877	75.692	67.185	81.726	73.791	68.073	82.956	82.738	85.699	92.489	99.245	103.824	106.36	96.442	111.149	100.491
gene10998	tmem243.L	11.808	10.955	11.122	10.25	9.806	12.599	9.468	9.096	5.033	4.794	9.633	8.469	9.009	10.669	7.644	6.343	6.596	8.54	9.819	7.538	11.623	11.774	12.066	12.291	11.013	10.807	8.937	9.865	9.279	8.408	8.649	9.021	7.665	7.122	7.574	8.55	9.134	10.335	9.76	8.294	8.817	8.438	7.916	8.391	7.064	7.761	8.423	7.249
gene10999	has-rs.S	0	0	0	0	0	0	59.607	72.596	619.885	629.674	68.997	80.014	0.433	0.296	48.297	44.127	0	0.093	4.023	5.503	24.693	21.93	24.374	11.031	11.038	13.637	51.498	52.946	56.695	41.254	35.107	29.787	17.163	13.068	13.683	0	0	0.076	34.052	57.625	19.726	3.418	5.595	5.054	5.725	0.973	2.339	0.452
gene11	adamts16.L	7.971	8.632	7.576	7.599	6.428	7.068	8.162	8.423	3.712	2.409	7.615	7.908	8.728	8.849	7.389	7.775	6.104	8.082	8.117	6.319	7.108	6.399	5.659	7.133	5.798	6.467	5.889	6.864	6.669	7.102	6.512	6.489	6.446	7.473	7.115	7.017	6.352	8.78	7.804	7.974	6.892	7.186	6.391	4.925	5.364	4.342	5.143	5.162
gene110	slitrk6.L	0.686	0.543	0.186	0	0	0.143	0.029	0.031	0	0	0	0.032	0	0	0	0	0	0	0.026	0	0	0.228	0.124	0.082	0.028	0.037	0.04	0.063	0.066	0	0	0	0.031	0	0	0.06	0	0.062	0	0.082	0.04	0.179	0.129	0.078	0.357	0.123	0.142	0.148
gene1100	rin2.L	1.017	0.957	2.069	2.048	1.803	1.581	1.638	1.839	2.779	3.356	1.714	1.532	1.81	1.989	2.109	1.886	2.266	2.11	2.381	2.324	0.658	1.005	0.231	0.608	0.744	0.522	0.258	0.215	0.278	0.192	0.245	0.15	0.284	0.17	0.226	0.264	0.278	0.275	1.331	1.451	1.207	1.695	1.486	1.735	1.925	1.731	1.563	1.423
gene11000	rabggtb.L	26.472	25.236	22.379	22.515	21.833	15.649	28.107	27.433	16.894	19.345	30.455	29.322	29.156	32.954	30.125	30.776	33.051	33.09	29.183	33.723	30.828	34.843	30.951	33.267	36.908	34.345	25.724	31.016	30.629	27.995	29.596	27.42	30.914	26.283	28.219	26.433	26.351	25.167	27.721	28.541	31.172	28.246	28.661	29.301	26.719	29.056	27.44	26.426
gene11001	prkaa1.L	123.257	122.535	123.766	126.604	116.435	107.783	142.283	147.898	111.494	121.356	139.502	144.586	146.325	150.426	127.808	123.467	125.781	134.049	131.999	119.694	139.082	144.736	138.316	132.03	135.288	139.188	137.663	141.138	148.613	148.965	130.051	149.706	143.925	149.031	147.181	139.168	150.641	149.327	132.778	134.452	126.946	142.465	148.022	132.55	133.603	139.29	140.483	151.085
gene11002	tram2.S	43.828	43.377	62.095	59.167	49.45	42.172	48.026	43.001	48.402	50.398	48.815	42.986	54.183	45.379	36.925	37.656	40.25	35.378	39.862	39.197	40.241	38.197	43.381	38.772	35.315	40.027	35.926	31.649	31.484	33.547	34.703	34.35	34.861	39.525	32.139	35.27	40.976	33.551	39.795	40.057	45.084	42.303	43.276	43.145	44.011	39.799	40.632	45.282
gene11003	nrdc.S	12.039	10.672	10.98	11.208	8.86	10.965	29.219	28.541	12.61	12.536	29.877	32.358	33.592	35.716	23.521	18.894	22.292	23.753	21.983	23.135	26.608	25.903	19.958	24.544	21.662	24.236	18.726	21.448	22.85	21.607	20.211	22.611	21.837	16.324	23.748	18.433	21.181	18.674	29.878	26.175	31.641	21.925	19.916	18.013	18.984	20.177	20.115	18.827
gene11004	gpr63.S	0.028	0	0.638	0.559	0.869	0.859	1.073	1.423	2.169	2.649	1.621	1.388	0.629	1.128	0.689	0.753	0.27	0.531	0.822	0.493	0.291	0.557	0.823	0.71	0.627	0.396	0.215	0.168	0.308	0.34	0.299	0.249	0.615	0.304	0.1	0.119	0.292	0.125	1.24	1.534	1.764	0	0.215	0.156	0.106	0.204	0.047	0.197
gene11005	rab19.L	2.763	2.963	3.39	2.038	5.412	2.61	1.676	1.43	1.27	0.926	1.616	1.782	1.611	2.092	0.785	1.497	1.585	1.349	1.451	2.076	2.057	1.66	1.274	1.791	1.814	2.368	2.419	1.783	2.107	1.974	2.105	1.758	2.129	2.194	2.392	2.284	2.792	1.704	1.547	1.946	1.753	2.087	2.816	2.839	4.117	3.121	2.838	3.365
gene11006	fxr1.S	117.623	119.167	103.244	101.717	105.414	143.201	124.02	118.007	135.153	135.172	127.167	131.426	138.25	145.166	125.798	118.338	130.406	128.934	123.182	156.048	103.952	103.234	104.24	99.252	99.793	105.03	118.565	115.027	117.14	116.832	109.277	113.373	124.012	123.629	116.889	120.822	120.857	119.069	106.744	117.363	128.115	117.486	121.058	125.339	124.131	123.874	116.638	124.825
gene11007	<NA>	0.54	0.617	0.475	0.796	0.53	0.466	0.654	0.587	0.491	0.526	0.454	0.487	0.575	0.54	0.724	0.48	0.411	0.632	0.689	0.726	0.237	0.401	0.903	0.466	0.562	0.936	0.425	0.693	0.483	0.44	0.417	0.557	0.275	0.582	0.335	0.728	0.385	0.709	0.559	0.534	0.521	0.291	0.628	0.57	0.612	0.547	0.777	0.57
gene11008	eci1.L	128.265	133.958	91.478	95.812	75.307	70.297	100.492	101.482	46.166	40.023	105.473	106.642	103.598	106.106	92.205	93.812	110.62	97.383	104.2	130.061	95.049	91.336	95.514	86.583	95.311	94.364	85.479	94.57	90.56	91.737	89.423	93.69	79.672	85.088	94.449	97.203	98.868	90.714	120.956	127.631	89.825	116.862	127.53	116.815	114.15	124.8	117.868	106.221
gene11009	jag1.L	13.045	12.456	6.002	7.308	6.013	4.286	6.859	5.71	21.624	20.611	5.872	6.873	4.916	5.209	8.754	8.073	7.751	9.071	12.582	12.165	6.248	5.634	5.22	6.767	6.225	6.075	7.029	7.105	6.406	7.703	6.016	6.531	6.846	5.637	5.119	6.954	9.14	6.492	5.292	6.229	4.639	7.827	9.685	11.003	9.553	8.468	9.151	7.722
gene1101	lmo7.S	53.549	52.728	36.958	37.443	43.978	58.516	53.143	50.039	24.657	22.579	54.894	51.209	56.921	56.051	45.938	40.577	47.522	43.501	45.82	45.871	50.636	49.995	49.908	51.196	46.733	49.52	45.303	44.098	43.581	44.915	42.615	41.718	45.018	46.358	44.317	49.751	51.097	48.459	41.747	43.21	51.574	48.424	46.965	48.877	47.315	47.642	47.412	50.946
gene11010	lnpep.L	44.207	45.89	38.518	40.299	32.743	32.61	37.519	37.627	10.289	8.31	37.153	38.702	37.889	41.427	32.116	30.285	30.818	34.021	39.88	36.926	35.308	35.405	36.383	35.611	35.942	33.654	26.387	28.066	26.015	32.651	28.592	25.653	31.517	27.508	27.117	32.034	42.94	34.856	34.778	34.149	40.119	26.537	29.098	29.19	29.98	30.64	31.707	31.384
gene11011	mgc75760.L	11.31	10.578	9.115	11.864	9.734	10.887	12.095	12.982	8.874	8.168	12.079	11.713	12.922	16.028	13.504	12.256	13.45	19.122	15.435	18.075	16.223	17.045	17.602	13.905	19.56	15.888	30.719	22.885	27.567	26.469	31.081	26.187	29.79	24.744	26.924	25.431	23.216	27.219	13.296	15.251	13.607	9.745	11.041	11.017	11.633	10.488	10.011	12.406
gene11012	tomm40l.S	4.32	3.111	4.975	4.943	5.424	5.063	3.766	4.307	5.026	5.477	3.552	3.215	3.249	4.085	2.687	2.777	3.451	2.96	2.991	3.394	5.755	6.315	5.219	5.793	7.709	6.179	5.521	4.137	4.466	4.174	4.07	3.948	4.732	4.468	3.121	5.71	4.855	4.148	3.784	3.845	3.335	5.583	4.887	5.265	5.688	4.834	4.932	5.607
gene11013	cabp1.L	1.676	1.749	1.674	3.302	1.853	1.127	1.584	1.606	2.012	1.728	2.069	1.738	1.74	2.022	1.356	1.87	2.23	1.307	2.476	3.212	1.362	1.718	1.619	1.532	0.817	1.023	1.741	0.87	1.365	1.128	1.2	1.837	1.089	1.217	1.329	1.879	1.005	1.963	1.671	1.213	1.499	1.972	0.76	1.38	2.496	1.204	1.254	1.09
gene11014	kcnj16.S	0	0	0.039	0	0	0	0	0.046	0	0	0	0	0	0	0	0	0	0.028	0	0.091	0	0	0	0	0	0	0	0.046	0.049	0	0.047	0.091	0	0	0	0	0	0	0	0	0	0	0	0	0	0	0	0.054
gene11015	alox5ap.L	0	0	0	0	0	0	0	0	0	0	0	0	0	0	0	0	0	0	0	0.131	0	0	0	0	0.117	0	0	0	0.28	0	0	0	0	0	0.318	0.127	0	0	0	0	0	0	0.41	0	0	0	0	0
gene11016	pgam5.S	55.572	55.612	59.332	58.176	54.11	52.737	70.035	68.355	44.674	46.524	70.734	68.787	74.932	76.641	58.49	62.982	58.852	65.772	63.629	57.599	49.092	45.093	45.11	47.812	47.305	51.149	64.519	63.52	59.935	64.089	59.07	62.931	69.924	64.671	59.937	58.551	69.213	59.072	69.57	58.459	73.395	60.322	66.171	59.561	62.758	58.534	57.731	62.55
gene11017	<NA>	0.035	0.148	0.498	0.596	0	0	0	0	0	0	0	0	0.05	0	0	0	0.034	0	0.044	0	0	0.194	0	0.14	0.047	0.063	0	0.215	0.281	0	0.164	0.106	0	0.222	0.128	0.254	0.062	0.106	0.138	0	0	0	0.274	0.133	0.203	0.104	0	0.063
gene11018	pdcd6.L	46.663	45.671	41.354	38.265	53.523	56.268	49.298	52.725	31.892	32.686	51.736	51.312	56.779	53.447	42.913	41.848	38.324	45.626	46.077	38.815	45.489	47.206	44.212	47.093	40.5	43.317	44.844	48.773	47.705	48.959	44.531	50.196	48.189	48.495	46.147	46.001	44.589	48.18	48.294	47.318	45.368	35.981	34.99	36.886	34.299	35.738	34.825	35.804
gene11019	tmem50a.L	56.745	57.177	43.591	54.849	57.528	51.444	67.666	67.338	56.459	56.343	64.589	75.752	68.261	74.561	62.301	59.104	67.522	72.201	57.652	90.828	63.682	78.584	81.287	85.387	87.466	81.096	78.327	88.048	90.725	91.998	100.687	89.724	92.146	81.693	94.325	75.749	66.725	83.527	67.273	80.191	75.793	72.582	80.339	74.377	70.446	72.706	77.289	70.005
gene1102	gpc5.S	6.276	6.223	5.889	6.337	4.135	6.251	5.405	4.53	1.482	1.551	5.294	4.396	4.7	4.921	3.76	2.285	3.363	4.014	3.75	3.619	6.174	5.034	5.387	5.226	3.39	5.112	4.659	5.83	3.494	5.241	5.332	3.396	4.491	5.027	3.778	7.014	7.042	5.703	4.751	4.689	5.384	4.627	5.458	5.362	3.859	3.696	4.694	4.34
gene11020	mapkapk3.L	0	0	0	0	0	0	0	0	0	0	0	0	0	0	0	0	0	0	0	0	0	0	0	0	0.075	0	0	0	0	0	0	0	0	0	0	0	0	0	0	0	0	0	0	0	0	0	0	0
gene11021	cd302.S	0	0	0	0	0	0	0	0.093	0.138	0.137	0	0	0	0	0	0	0	0	0	0	0	0.113	0	0	0	0	0	0	0	0	0	0	0	0	0	0	0	0	0	0	0.119	0	0	0	0	0	0	0
gene11022	sardh.L	3.831	4.903	4.265	4.946	2.929	2.804	4.758	3.846	2.055	2.277	5.022	4.305	5.027	5.727	4.753	4.996	6.187	4.915	4.704	7.626	2.438	3.357	2.183	3.261	1.922	2.815	2.897	3.67	3.089	3.381	4.54	3.499	5.517	4.318	3.981	5.543	6.222	4.135	5.926	3.841	5.318	6.06	6.101	5.659	4.808	5.216	5.321	5.366
gene11023	fadd.S	36.484	37.309	36.164	40.433	35.205	36.663	31.005	28.564	16.086	17.524	26.942	28.792	32.697	31.735	28.25	29.946	30.218	30.408	31.349	33.799	30.557	29.693	26.528	27.966	27.015	27.73	29.462	26.195	25.374	29.45	30.115	27.294	27.116	32.715	30.411	29.571	30.61	28.444	29.138	28.337	29.554	30.122	32.05	30.469	30.35	31.099	35.238	32.57
gene11024	<NA>	0	0	0	0	0	0	0	0	0	0	0	0	0	0	0	0	0	0	0	0	0	0	0	0	0	0	0	0	0	0	0	0	0	0	0	0	0	0	0	0	0	0	0	0	0	0	0	0
gene11025	ptdss2.S	26.49	28.751	31.052	31.639	35.458	40.824	25.215	22.075	13.209	12.887	24.836	24.13	28.075	25.923	21.914	21.621	27.474	24.6	27.524	33.71	35.133	27.767	29.736	28.385	28.872	31.01	22.791	22.875	22.66	22.297	21.386	22.109	23.789	24.61	24.414	31.046	30.972	27.775	25.748	24.142	28.06	35.039	33.601	35.052	40.122	35.836	33.714	34.923
gene11026	gdf9.S	54.065	55.009	47.969	51.826	49.912	58.636	47.834	46.939	33.442	36.12	48.168	47.983	46.275	48.635	46.968	45.585	41.755	46.472	50.383	43.072	57.411	57.194	55.748	54.477	52.127	53.645	52.568	50.4	53.818	56.694	50.301	55.723	56.404	54.979	49.599	49.985	53.728	51.419	41.808	41.309	42.632	44.711	45.376	44.101	43.842	43.106	43.707	42.625
gene11027	XB22065601.L [provisional]	15.512	15.686	22.518	17.529	19.313	15.512	14.744	13.673	11.471	13.642	14.427	13.341	16.691	15.843	16.845	19.836	20.686	18.001	20.727	17.592	10.265	9.237	9.401	9.279	8.947	8.908	11.498	10.447	10.653	9.516	10.203	11.528	10.448	11.269	9.889	11.985	12.954	10.929	17.898	11.967	14.137	19.633	17.752	18.821	18.036	18.755	18.363	18.103
gene11028	rnft2.L	4.584	4.493	1.427	2.085	1.404	2.242	1.758	1.638	1.109	1.585	1.323	1.835	1.758	1.983	1.542	2.604	2.172	2.122	2.298	2.204	2.552	2.943	2.884	3.054	2.269	2.714	2.279	2.542	3.153	2.993	2.201	2.181	2.018	2.039	2.741	2.715	2.502	3.393	1.628	1.593	1.614	2.669	2.544	1.684	1.537	1.824	1.953	1.542
gene11029	grk6.L	32.552	34.593	33.723	31.988	33.394	41.287	26.646	25.878	20.255	20.832	27.199	26.123	30.728	29.075	29.843	27.587	28.964	31.711	31.635	32.829	34.729	34.802	38.067	31.379	33.196	30.439	29.866	30.589	28.906	28.78	27.102	27.802	29.739	29.461	26.973	33.165	33.934	31.71	27.787	26.51	29.028	32.399	29.947	31.598	31.692	29.73	32.866	32.068
gene1103	<NA>	0	0	0	0	0	0	0	0	0	0	0	0	0	0	0	0	0	0	0	0	0	0	0	0	0	0	0	0	0	0	0	0	0	0	0	0	0	0	0	0	0	0	0	0	0	0	0	0
gene11030	fam110a.L	42.706	42.556	61.065	56.378	54.414	38.71	42.036	37.266	30.893	25.489	41.193	37.116	42.772	41.579	41.419	41.529	52.318	45.196	48.53	63.591	33.481	35.07	34.639	27.682	31.929	31.349	29.052	34.417	32.865	28.514	30.209	28.475	35.359	39.447	29.504	47.277	49.462	41.846	49.273	36.042	40.768	63.684	66.117	69.383	70.61	61.115	68.302	66.939
gene11031	dnaja4.1.L	271.395	280.946	196.246	236.762	189.549	201.759	223.651	235.553	126.136	126.842	226.02	243.166	233.658	247.18	225.222	228.591	242.372	246.272	246.537	361.224	256.618	260.581	278.819	260.863	292.096	278.067	255.882	264.505	274.067	267.974	270.077	265.889	247.741	242.487	279.455	297.411	282.191	291.584	211.84	279.297	245.325	345.689	358.163	345.413	361.491	378.232	353.831	339.387
gene11032	prl.1.L	1.446	1.635	13.569	12.978	6.304	6.231	0	0	0	0	0.191	0	0	0	2.666	1.788	1.878	1.761	1.937	0.893	0	0	0	0	0	0	0	0	0	0	0	0	0	0	0	0	0	0	0	0	0.233	2.077	3.175	2.034	1.15	3.548	3.901	3.214
gene11033	fam110d.S	0.048	0.05	0.062	0.163	0.169	0.167	0.067	0.146	0	0	0	0.147	0.069	0.141	0.468	0.299	0.565	0.662	0.299	0.143	0.169	0.088	0.191	0.476	0.193	0.259	0.187	0.588	0.231	0.074	0.075	0.434	0.215	0.076	0	0.278	0.085	0	0.094	0	0.186	0	0.15	0.453	0.461	0.285	0.082	0.43
gene11034	tada1.L	97.24	108.322	112.981	103.701	112.959	115.93	73.825	67.699	41.702	37.402	70.212	70.452	74.397	72.305	56.456	51.503	58.096	66.06	84.48	75.893	79.429	91.729	82.362	78.737	74.014	81.896	73.3	75.795	79.573	78.125	73.434	73.341	69.404	70.74	71.802	84.14	83.496	94.085	68.851	70.277	66.503	67.231	66.753	66.012	70.341	62.438	68.171	64.217
gene11035	csk.S	58.163	60.663	63.163	54.963	59.393	62.31	39.014	38.248	24.285	28.021	43.478	41.445	45.705	47.729	60.133	61.984	63.796	59.209	64.272	64.912	54.742	52.003	55.756	45.763	45.682	46.879	43.463	43.38	40.235	37.569	37.519	35.594	44.465	44.689	41.498	49.11	54.478	51.441	43.653	32.501	40.468	52.61	54.977	56.477	55.753	52.679	58.033	57.568
gene11036	styxl2.S	0	0	0	0	0.169	0	0	0	0	0.108	0	0	0	0	0	0	0	0	0	0	0	0	0	0	0.065	0	0	0.074	0	0	0.075	0.073	0	0	0.088	0	0	0.219	0	0	0	0	0	0	0.093	0	0	0
gene11037	atad1.S	37.742	39.263	36.38	33.292	21.41	23.449	29.418	29.795	28.538	31.552	30.5	26.616	35.635	30.865	23.682	26.558	28.505	25.349	27.714	24.843	36.61	34.184	34.463	35.091	30.903	33.629	24.697	26.605	24.21	24.49	24.279	25.912	24.192	26.94	23.22	25.684	29.245	25.329	28.582	25.511	29.338	33.486	31.529	33.21	33.006	32.15	32.015	31.971
gene11038	cdkn2b.L	0	0	0	0	0	0	0.159	0	0	0.255	0	0	0	0	0.475	0.425	0	0	0	0	0	0	0	1.355	0	0.205	0	0	0	0	0	0	0.339	0	0.414	0	0	0	0	0	0	0	0	0	0	0	0	0
gene11039	bicral.L	0.889	0.5	0.467	0.767	0.477	0.314	0.662	0.31	0.255	0.152	0.288	0.312	0.356	0.298	0.252	0.338	0.244	0.541	0.479	0.541	0.44	0.75	0.542	0.584	0.395	0.571	0.221	0.554	0.616	0.175	0.634	0.376	0.304	0.5	0.247	0.131	0.36	0.445	0.444	0.361	0.484	0.354	0.495	0.513	0	0.537	0.194	0.162
gene1104	crat.S	20.407	21.529	30.816	29.726	12.246	7.565	23.233	25.444	17.677	21.477	22.384	22.747	25.532	25.062	30.186	28.482	32.599	28.918	32.012	33.347	16.446	15.138	16.3	15.58	14.246	17.851	27.302	21.848	24.257	26.334	25.928	24.328	28.1	30.088	27.344	28.297	33.238	26.341	26.805	21.265	25.411	33.373	34.179	34.771	30.046	26.492	29.259	31.313
gene11040	cacfd1.S	32.001	32.096	31.222	28.386	37.529	37.691	32.473	29.889	21.979	21.54	33.264	28.415	36.741	32.167	27.208	28.618	35.503	30.631	29.307	37.257	34.257	39.453	33.756	34.842	31.2	37.607	39.789	36.193	36.546	36.783	31.04	33.073	32.525	32.906	34.476	36.754	37.061	31.561	31.013	30.204	29.207	33.376	36.794	34.17	34.311	31.939	37.024	36.29
gene11041	proser1.S	0.066	0.184	0.845	0.667	0.768	0.759	1.706	1.929	22.359	23.5	1.323	1.504	0.094	0.256	0.974	0.49	0.086	0.141	0.19	0.033	0.772	0.483	0.436	0.695	0.909	0.905	1.236	1.238	1.225	1.519	2.448	1.517	2.444	0.931	1.868	0.253	0.309	0.099	1.157	0.871	1.572	0.607	0.171	0.495	0.252	0.259	0.375	0.548
gene11042	crygdl.24.L	0	0	0	0	0	0	0	0	0	0	0	0	0	0	0	0	0	0	0	0	0	0	0	0	0	0	0	0	0	0	0	0	0	0	0	0	0	0	0	0	0	0	0	0	0	0	0	0
gene11043	ferd3l.L	0	0	0	0	0	0	0	0	0	0	0	0	0	0	0	0	0	0	0	0	0	0	0	0	0	0	0	0	0	0	0	0	0	0	0	0	0	0	0	0	0	0	0	0	0	0	0	0
gene11044	poldip3.S	82.681	82.748	86.196	86.253	76.279	84.771	88.326	85.548	83.056	90.686	88.645	88.67	89.846	93.216	82.394	80.22	82.534	84.562	88.103	77.745	91.677	85.558	85.717	82.804	84.846	88.123	86.501	85.149	91.089	92.333	84.088	92.076	85.736	90.81	91.985	88.868	96.741	89.317	85.356	76.949	79.237	75.994	77.552	78.531	71.585	76.782	74.593	76.504
gene11045	rnf157.L	35.388	34.377	43.673	38.925	35.882	35.826	38.567	36.339	34.459	33.556	35.819	33.765	40.344	38.744	40.902	45.663	52.742	45.04	45.226	59.457	32.911	30.211	29.3	30.124	26.898	32.029	33.432	30.957	32.659	32.969	31.002	33.996	36.136	37.496	33.336	40.882	45.811	35.715	37.932	32.695	39.023	50.659	50.592	56.852	54.299	50.159	55.267	54.544
gene11046	chst12.L	19.645	18.453	18.585	21.461	15.838	18.097	10.786	9.925	3.675	4.083	8.964	8.56	10.099	9.84	13.224	14.053	13.239	14.269	21.181	14.754	16.712	15.361	16.649	15.18	14.067	14.453	13.283	11.357	12.498	11.113	11.689	12.159	10.012	9.589	10.527	14.715	16.967	14.642	10.783	10.7	9.634	14.374	13.177	14.494	15.733	16.643	15.091	15.405
gene11047	sort1.S	34.896	38.651	35.223	36.303	25.051	28.533	32.887	30.616	13.084	12.353	35.215	33.335	31.256	34.883	23.551	23.599	24.397	26.099	29.971	34.4	41.518	44.109	44.689	46.075	45.974	45.35	29.315	29.262	29.047	31.162	29.032	29.281	25.455	25.02	27.726	33.567	34.745	34.254	29.418	37.228	28.497	41.503	38.69	41.105	39.947	38.131	37.034	35.18
gene11048	nus1.L	24.625	25.54	20.898	20.748	19.646	20.64	22.235	20.955	6.103	6.338	22.304	21.893	24.528	22.584	17.613	19.024	18.524	21.241	22.631	20.927	22.353	21.134	20.996	21.386	18.649	20.359	17.928	19.5	18.535	19.623	16.749	18.289	18.597	20.172	18.462	21.204	20.192	21.395	20.224	18.859	19.366	18.936	18.146	17.777	17.731	18.577	16.494	17.626
gene11049	<NA>	1.84	1.891	0.858	1.104	0.746	0.492	1.264	1.552	9.609	9.965	1.602	1.344	0.344	0.332	1.479	1.623	0.486	0.573	1.146	1.185	0.6	0.365	0.706	1.125	1.026	0.689	0.608	0.716	0.772	1.357	1.432	0.983	1.859	1.185	1.314	0.389	0.501	0.428	0.639	0.875	1.156	0.762	0.42	0.482	0.926	0.462	0.389	0.66
gene1105	<NA>	0	0	0	0	0	0	0.195	0	0.158	0.157	0.223	0.321	0.2	0	0	0	0	0	0	0	0	0	0	0.139	0	0	0	0.107	0	0	0	0	0	0	0	0	0	0	0.274	0.279	0.136	0	0	0	0.134	0	0.12	0
gene11050	<NA>	0	0	0	0	0	0	0	0	0	0	0	0	0	0	0	0	0	0	0	0	0	0	0	0	0	0	0	0	0	0	0	0	0	0	0	0	0	0	0	0	0	0	0	0	0	0	0	0
gene11051	slain2l.S	38.149	40.721	38.856	37.84	33.294	36.993	55.371	53.813	21.073	20.877	54.812	52.691	60.815	53.268	73.425	68.978	77.075	71.666	79.32	72.424	42.341	41.737	36.737	37.209	34.936	38.429	46.273	50.931	49.572	52.172	45.715	51.206	46.377	53.409	44.081	49.291	54.96	52.15	54.437	45.55	50.076	66.739	63.148	70.579	63.268	65.884	64.844	65.901
gene11052	ncl.S	365.203	359.367	233.099	253.884	305.015	371.85	371.343	395.628	885.196	898.738	399.135	425.254	398.823	426.469	329.068	309.298	316.677	334.242	300.283	328.172	374.382	369.9	374.806	371.636	381.776	393.729	405.782	411.295	408.761	440.81	406.422	403.686	448.895	431.036	443.058	387.015	393.158	407.31	311.749	418.913	401.577	334.341	335.83	355.647	340.917	343.512	327.03	349.706
gene11053	<NA>	0.068	0.318	0.173	0	0.118	0.117	0.562	0.613	0.076	0.075	0.482	0.822	0.384	0.64	0.561	0.335	0.56	0.742	0.418	0.502	0.475	0.68	0.469	0.4	0.451	0.666	0.459	0.257	0.269	0.208	0.157	0.051	0.2	0.159	0.183	0.486	0.119	0.457	0.263	0.468	0.327	0.35	0.052	0.381	0.646	0.249	0.231	0.361
gene11054	marchf5.L	44.391	44.625	47.94	45.672	47.064	38.765	30.206	29.652	9.093	9.266	30.07	31.403	32.71	31.605	26.888	26.443	29.776	26.429	37.566	42.399	38.441	38.904	37.662	37.096	37.777	36.874	26.674	26.61	29.185	24.34	24	23.93	22.511	26.672	22.154	37.013	34.29	34.858	31.044	29.821	32.85	40.915	42.975	41.262	44.381	40.11	46.378	41.218
gene11055	slc25a22.L	0.096	0.033	0	0	0	0.11	0.066	0.024	0.393	0.178	0.025	0.073	0.091	0.023	0.044	0.059	0.078	0.029	0.079	0.237	0.056	0.088	0	0.031	0	0.029	0	0	0	0	0.049	0	0	0	0	0	0.028	0.024	0.062	0	0.031	0.055	0.025	0.15	0.061	0.047	0	0.085
gene11056	akr1d1.S	0.065	0	0	0	0.225	0	0	0	0	0.431	0.102	0	0	0.188	0	0	0.063	0.059	0	0	0	0	0	0	0.086	0	0	0	0	0	0	0.193	0	0	0	0.186	0	0	0	0	0	0	0	0	0	0	0	0.115
gene11057	snx27.L	39.095	39.696	43.943	38.129	28.401	23.538	32.164	33.506	43.968	44.326	36.474	32.303	35.345	33.407	34.473	37.67	43.185	34.4	37.423	45.067	37.772	36.278	36.867	35.959	35.866	35.493	44.66	40.093	39.538	41.887	40.739	46.223	43.689	49.337	40.92	44.146	46.365	41.702	37.414	29.358	37.289	55.739	55.889	57.949	60.614	61.917	60.888	59.042
gene11058	pabpn1.S	140.646	141.571	128.307	122.447	159.395	145.307	171.146	163.172	289.192	291.568	170.407	157.212	178.439	162.671	139.683	142.525	172.395	139.205	129.843	198.567	150.565	147.223	151.664	146.631	153.285	155.143	128.263	133.634	133.175	135.996	127.66	128.104	144.879	155.346	149.038	147.898	131.684	133.056	165.833	171.865	200.991	169.744	183.698	188.628	193.656	186.36	207.046	191.941
gene11059	msl2.S	73.798	75.866	96.688	82.352	104.032	87.732	72.477	71.565	94.666	95.486	77.084	70.063	70.924	66.114	74.795	77.498	77.875	64.705	73.587	91.059	77.832	75.164	70.663	67.457	66.78	73.363	62.123	59.839	61.937	57.719	62.215	66.712	63.066	75.869	63.011	67.028	63.97	55.834	78.922	64.546	82.723	90.585	100.402	101.142	102.493	94.513	94.746	94.166
gene1106	stk24.S	42.138	41.852	38.891	40.434	30.411	37.244	33.968	35.861	18.808	18.248	35.944	39.9	42.618	41.937	38.178	35.383	39.871	39.643	40.817	42.969	36.387	40.675	37.427	39.873	38.087	36.268	35.852	39.454	35.829	38.535	39.501	38.887	40.383	38.391	39.832	39.129	40.623	41.469	36.39	36.882	40.059	38.781	36.44	33.961	37.385	39.634	39.072	36.788
gene11060	taf12.L	91.493	95.39	78.561	95.913	68.707	63.083	70.302	66.168	35.353	41.816	65.785	66.523	57.89	65.03	59.86	52.905	60.687	61.937	79.488	75.609	75.554	83.328	95.864	76.319	73.772	74.553	85.005	78.127	73.319	61.036	67.493	60.374	35.676	40.271	36.117	59.911	53.385	64.218	65.21	79.699	60.406	91.159	90.195	88.317	77.666	89.805	99.337	69.879
gene11061	frs3.S	2.799	2.576	1.641	1.897	2.441	2.412	1.345	1.468	0.348	0.951	1.199	1.417	1.655	1.357	1.344	1.394	1.041	1.793	1.946	2.449	2.249	1.776	1.809	1.61	2.304	1.738	2.145	2.364	2.102	1.58	1.351	2.213	1.036	1.157	1.053	2.206	2.15	1.662	1.135	1.615	1.125	1.909	2.139	1.203	2.448	2.404	1.987	1.763
gene11062	fbxw8.L	42.181	42.753	49.46	40.484	52.025	35.939	47.192	42.549	38.688	38.031	44.591	42.242	49.34	44.849	46.61	41.993	52.185	49.672	50.126	51.221	46.056	44.317	40.601	46.372	44.64	45.423	40.748	41.299	37.602	39.701	39.537	42.964	42.074	47.553	44.259	49.499	48.334	44.956	48.519	41.554	45.937	45.937	50.212	48.663	49.156	46.708	45.586	44.719
gene11063	bcs1l.L	10.565	12.723	7.279	8.206	2.835	2.802	3.138	3.877	5.264	5.328	3.788	2.794	3.52	3.112	19.397	21.045	23.418	27.041	23.162	23.401	3.449	2.345	3.643	2.953	3.418	3.824	10.519	10.663	11.294	13.645	10.835	9.997	12.221	11.73	13.75	10.878	13.521	12.965	3.664	1.692	3.715	11.647	11.27	10.989	11.754	11.462	10.131	10.496
gene11064	<NA>	6.182	6.252	3.286	3.597	8.234	7.078	0.394	0.5	5.007	4.892	0.45	0.315	0.371	0.548	6.73	6.34	6.802	6.744	7.71	6.829	7.307	7.293	7.022	7.189	6.206	7.163	6.18	6.92	6.69	6.994	6.247	6.383	6.477	7.519	6.888	6.939	8.805	7.05	0.284	0.411	0.371	7.646	6.805	7.397	7.059	7.065	6.25	7.862
gene11065	lancl1.S	0.091	0.047	0.174	0.306	0.159	0.157	0.063	0.206	0.102	0.202	0.216	0.207	0.064	0	0.063	0	0	0	0.169	0.337	0.08	0.166	0.27	0.359	0.242	0.163	0.088	0.138	0	0.349	0	0.068	0	0.214	0.246	0.065	0	0	0.088	0.09	0.263	0	0.07	0.085	0	0.134	0.31	0
gene11066	odr4.L	25.579	24.867	26.644	25.722	27.337	31.455	16.514	17.202	20.505	21.077	17.575	16.228	17.816	17.814	17.305	17.98	15.992	17.527	22.079	13.875	22.695	23.73	25.257	22.763	22.692	22.798	23.634	21.99	22.514	26.433	22.224	21.966	23.552	23.464	22.957	24.988	21.708	25.627	15.106	14.884	16.331	20.63	18.432	17.11	17.338	18.773	16.744	19.553
gene11067	cmtm6.L	43.078	42.874	34.189	42.138	42.432	52.507	38.184	44.802	23.034	26.845	40.469	42.543	43.728	42.113	29.311	27.843	22.131	32.959	32.194	16.554	44.465	47.825	51.518	54.031	53.759	50.195	38.68	43.165	43.062	45.778	51.286	46.364	39.698	40.403	41.085	39.131	36.552	38.3	37.879	39.951	38.925	26.415	23.405	22.813	20.014	23.422	23.204	23.583
gene11068	pga4.L	0.116	0	0	0.196	0	0	0	0	0.26	0	0	0.177	0	0	0	0	0	0.053	0.072	0	0	0.106	0	0	0	0	0	0.177	0	0	0	0	0.086	0.091	0	0	0.102	0.087	0	0	0	0.1	0	0	0	0	0.496	0
gene11069	cdk18.L	0.61	0.483	0.727	0.567	0	0.145	1.252	1.049	0.565	0.328	1.265	1.278	1.344	1.102	0.233	0.312	0.553	0.442	0.442	0.343	0.701	0.769	0.542	0.747	0.644	0.64	0.489	0.544	0.669	0.807	0.747	0.788	0.903	0.594	0.532	0.786	0.776	0.6	1.229	1.248	0.934	0.834	1.044	1.105	0.883	0.96	1.04	0.935
gene1107	cox5a.L	137.06	133.431	146.152	155.617	118.555	81.123	76.753	81.29	72.671	54.793	81.177	70.648	70.687	77.683	93.606	87.949	94.109	111.262	125.895	126.09	93.846	96.319	103.309	96.347	96.028	89.068	106.326	102.08	108.345	111.647	105	115.251	101.658	95.963	115.316	118.634	128.813	128.024	81.974	78.656	65.337	148.695	148.655	130.318	145.752	133.316	132.957	120.883
gene11070	XB5992952.L [provisional:adpgk]	60.745	61.289	53.914	48.358	56.694	51.923	62.843	59.59	34.199	32.701	61.326	57.129	68.839	64.409	65.232	65.012	71.013	65.1	61.554	74.354	60.59	57.787	53.789	54.76	54.707	56.537	72.621	73.154	69.045	75.085	66.106	74.637	71.697	75.198	76.594	74.926	74.483	73.253	59.289	52.171	60.441	78.299	77.424	78.23	75.643	74.327	73.829	79.855
gene11071	stard10.L	1.838	1.305	6.21	8.662	13.081	12.422	1.12	1.333	34.226	37.295	1.977	1.675	1.67	0.642	1.118	1.364	2.006	1.478	1.727	1.308	19.338	16.261	14.129	21.319	15.375	16.961	0.854	0.112	0.468	0.677	1.022	1.322	1.306	1.729	0.93	0.106	0.387	1.876	2.004	2.327	3.974	0.887	1.026	2.344	1.403	0.974	1.128	1.831
gene11072	igfbp1.S	0	0	0	0.154	0	0	0	0	0	0	0	0	0	0	0	0	0	0	0	0	0.08	0	0	0	0	0	0	0	0	0	0	0	0	0	0	0	0	0	0	0	0.088	0	0	0	0.174	0	0	0
gene11073	rassf6.L	0.913	0.885	1.168	2.085	0.341	0.225	2.391	3.251	0.511	0.435	2.733	2.674	2.868	3.415	0.496	0.766	0.191	0.596	1.209	0.773	0.343	0.238	0.323	0.772	0.738	0.408	0.947	0.694	0.882	1.15	1.209	0.83	0.869	0.613	1.06	0.515	0.401	1.419	3.173	2.773	3.083	3.203	4.042	4.463	4.666	3.84	3.778	3.536
gene11074	paqr6.L	0.058	0.03	0.074	0	0	0	0.04	0.044	0.065	0.386	0.046	0	0.041	0	0.04	0	0.028	0.026	0	0.043	0	0.159	0	0	0.116	0.155	0.224	0.132	0.138	0.177	0.045	0.26	0.043	0.181	0.052	0.125	0.051	0	0.056	0.114	0.112	0.399	0.09	0.542	0.166	0.085	0.049	0
gene11075	col4a5.L	0	0	0.02	0.053	0	0	0.109	0.356	0.14	0.244	0.05	0.072	0.022	0	0.13	0.136	0.046	0.029	0.116	0.07	0.138	0.115	0.093	0	0.021	0	0.122	0.286	0.15	0.024	0.024	0.024	0	0.049	0.028	0.045	0	0.047	0.092	0.093	0	0.054	0.073	0.029	0	0	0	0
gene11076	ndufb7.L	48.743	46.698	58.169	59.058	52.972	33.254	36.216	40.154	22.962	23.055	31.646	36.784	39.024	38.37	31.354	30.065	34.389	32.812	41.358	50.055	48.753	50.071	51.833	59.703	54.253	42.016	45.108	39.153	36.398	36.355	38.991	32.44	33.726	33.77	35.397	49.246	44.153	55.587	37.756	46.071	42.384	52.877	56.142	44.452	55.225	60.585	62.25	51.64
gene11077	strap.L	47.926	47.443	53.028	53.836	37.267	28.956	52.312	50.759	48.093	51.93	58.018	49.906	56.964	55.172	59.686	59.857	71.537	60.373	58.869	73.071	82.18	77.201	76.093	73.205	75.421	74.316	71.519	72.758	68.567	76.345	72.212	73.747	71.317	68.522	67.815	78.622	82.866	79.699	61.437	71.212	59.242	63.648	67.291	66.478	61.642	58.832	55.146	54.252
gene11078	acbd3.S	32.694	33.013	31.303	31.106	41.208	36.755	36.14	36.128	41.72	40.763	38.183	33.088	39.067	32.701	32.08	33.421	42.34	35.444	31.976	40.294	34.739	31.641	32.855	31.138	31.066	34.002	37.032	37.213	36.399	38.525	37.429	38.299	40.47	42.005	38.381	44.784	42.432	41.392	35.95	34.313	32.116	44.482	44.65	46.506	47.904	47.457	45.978	49.178
gene11079	sorbs1.L	22.894	22.365	23.938	20.452	18.423	21.558	24.595	23.646	8.103	7.662	24.138	25.141	27.047	24.75	22.518	21.095	21.373	23.159	22.145	21.765	17.9	17.982	16.551	17.524	17.314	15.761	22.919	23.63	22.028	26.117	19.318	22.814	21.889	24.416	22.779	21.397	24.478	24.095	22.593	20.334	21.445	21.462	20.013	19.677	19.553	19.662	20.017	20.386
gene1108	ier3ip1.S	15.321	13.341	11.854	10.643	11.651	11.362	9.616	7.469	3.787	3.864	7.607	9.674	10.175	7.905	8.374	7.598	8.417	10.294	8.81	10.103	11.009	15.139	13.409	11.77	12.811	11.706	13.368	12.728	13.601	12.295	10.525	12.144	10.286	10.748	11.582	13.246	12.202	12.965	8.583	10.042	8.424	12.204	13.322	9.688	11.984	14.164	14.42	10.771
gene11080	sync.S	0	0.043	0.052	0	0.569	0.141	0.056	0.062	0.274	0	0.129	0.124	0.058	0.119	0.113	0.101	0.04	0	0.101	0.121	0	0.075	0	0.161	0	0	0.079	0.062	0.065	0.063	0	0.122	0.181	0.064	0.074	0.176	0	0.122	0.238	0	0	0	0	0	0	0	0.139	0
gene11081	slc16a13.L	0.245	1.022	1.409	0.618	1.067	0	0.339	0.185	0.411	0.681	0.581	0.465	0.174	0.178	0.846	0.151	0.179	0.112	0.53	0.454	0.429	0.895	0.727	1.569	0.57	1.422	1.185	0.837	1.265	0.563	0.567	0.55	1.268	1.534	1.658	0.703	0.537	0.735	0.238	0.726	0.472	0.527	0.948	0.803	0.817	0.811	1.147	0.218
gene11082	pxn.S	68.055	69.994	81.526	78.036	73.547	76.753	87.393	85.388	46.74	47.094	85.861	85.07	92.823	87.598	77.395	76.692	73.14	78.417	83.61	64.946	76.521	73.595	71.056	71.839	70.108	70.227	71.554	79.356	77.663	83.482	73.555	80.213	80.857	84.833	77.137	73.011	81.665	78.356	79.363	71.116	76.794	69.988	68.638	68.413	66.481	66.73	63.641	67.043
gene11083	cfd.L	0	0	0	0	0	0	0	0	0.451	0.672	0	0	0	0	0	0	0	0	0	0	0	0	0	0	0	0	0	0	0	0	0	0	0	0	0	0	0	0	0	0	0	0	0	0	0	0	0	0
gene11084	<NA>	0.877	0.801	0.14	0	0.765	0	0	0	0	0.244	0.347	0.167	0.156	0.319	1.213	0.136	0.32	0.301	1.085	0.813	0	0	0	0	0	0	0.212	0.333	0.174	0	0.339	0.822	0.162	0.344	0.198	0.63	0.578	0.165	0	0	0.635	0.378	0	0	0.209	0	0.561	0
gene11085	<NA>	0.101	0.316	0.517	0.34	0	0.348	0	0	0.452	0.449	0	0.307	0.43	0.147	0	0	0.098	0.092	0.374	0	0.354	0	0.2	0	0.269	0.181	0.196	0.153	0.482	0	0.468	0.151	0	0	0	0.145	0.177	0.758	0	0.599	0.195	0.174	0.156	0.757	0	0.297	0	0.18
gene11086	<NA>	99.68	108.519	95.967	124.803	81.097	97.83	53.632	65.03	13.074	20.423	57.891	62.119	49.235	66.268	49.784	50.704	53.083	52.613	73.705	96.346	53.094	69.728	64.477	62.316	74.471	64.169	88.663	66.699	75.86	67.478	74.955	62.524	76.432	67.826	73.645	105.532	108.679	112.358	67.545	71.925	64.896	110.139	109.214	96.816	105.354	105.857	105.246	93.502
gene11087	<NA>	0.205	0.086	1.573	1.517	0	0	0.17	0.062	2.75	2.278	0.13	0.062	0	0.179	0.736	0.608	0.798	0.973	1.519	1.761	0.072	0.374	0	0.323	0.327	0.146	1.031	2.055	1.238	1.571	0.886	1.719	1.274	1.156	1.628	1.059	1.295	1.168	0.08	0.405	0.158	0.071	0.127	0.538	0.313	0.181	0	0
gene11088	<NA>	0.019	0.019	0.072	0	0	0	0.052	0	0.125	0	0.029	0	0	0	0.026	0.092	0.054	0.136	0.046	0.193	0	0	0	0.074	0.025	0.033	0.144	0.057	0.059	0.171	0.086	0.084	0.083	0.117	0.067	0.08	0.098	0.168	0.036	0	0.036	0.161	0	0.14	0.036	0.11	0	0.033
gene11089	ckap4.L	6.882	5.928	13.051	14.791	11.713	9.576	13.599	11.525	52.788	50.631	12.196	9.194	9.472	12.064	12.095	13.531	11.996	13.484	11.891	11.003	9.013	12.426	10.019	11.284	15.901	10.081	17.181	16.323	15.497	17.931	16.009	14.846	15.59	13.644	14.376	14.059	19.295	17.108	8.071	7.626	13.443	13.575	11.63	9.641	13.451	11.72	11.092	10.174
gene1109	dcun1d1.L	23.032	22.739	22.551	19.799	23.388	27.928	14.765	17.399	8.144	8.65	15.769	15.561	20.161	16.501	14.853	15.5	12.821	17.581	18.059	14.82	20.364	18.814	17.281	19.173	17.627	18.585	20.08	17.013	18.04	20.529	17.864	19.607	16.385	18.945	17.062	17.943	22.414	20.796	14.072	15.677	17.368	21.307	20.437	23.232	18.885	18.277	18.434	17.774
gene11090	hnrnpc.L	141.558	147.789	136.121	140.98	134.138	162.013	142.85	151.1	141.323	141.08	149.009	157.236	145.432	160.651	141.541	143.661	140.503	143.742	138.254	169.08	134.977	134.713	140.729	134.18	133.089	135.41	146.732	152.319	153.136	144.679	141.349	137.223	134.521	127.163	140.768	129.956	133.742	140.751	151.439	154.535	144.552	139.778	133.327	135.73	141.621	138.273	128.922	134.807
gene11091	fam161b.S	12.649	11.103	10.237	10.981	7.171	10.786	10.763	11.209	6.801	7.059	9.543	10.726	10.655	11.51	11.926	10.94	10.842	12.209	12.543	10.868	12.615	14.294	12.926	11.283	12.619	12.786	12.55	12.093	10.735	11.105	10.286	11.853	10.455	10.366	9.928	10.789	10.126	12.609	8.701	10.961	11.904	8.627	9.906	9.639	9.212	10.002	10.739	10.253
gene11092	sc5d.S	1.344	1.013	1.194	1.382	2.214	1.03	1.137	0.959	0.334	0	1.24	1.134	1.272	1.195	0.878	0.923	0.655	0.887	1.016	0.886	0.916	0.614	0.961	1.178	1.193	0.801	5.133	5.505	5.048	6.013	4.787	4.363	3.261	4.096	4.855	5.526	4.721	6.051	1.018	1.108	1.153	0.515	0.463	0.35	0.428	0.22	0.254	0.531
gene11093	mmrn1.L	0.047	0.195	0.149	0	0	0.08	0.032	0.07	0.104	0.156	0.074	0	0.132	0	0	0.086	0.023	0.17	0.086	0.035	0.164	0.085	0.139	0.23	0.279	0.083	0.361	0.035	0.074	0.107	0.18	0.175	0.173	0.219	0.126	0.235	0.123	0.105	0	0.092	0.09	0.121	0.036	0.131	0	0.069	0	0.041
gene11094	hspb8.L	0	0	0	0	0	0	0	0	0.209	0.104	0	0	0	0	0.065	0	0	0	0	0	0	0	0	0	0	0	0	0	0	0	0	0	0	0	0	0	0	0	0	0	0	0	0	0	0	0	0	0
gene11095	<NA>	0	0	0.041	0	0	0	0	0.024	0	0	0.076	0	0	0	0	0.02	0	0	0	0.047	0	0.029	0	0	0	0	0	0.024	0.025	0.024	0	0.048	0.024	0	0	0	0	0	0.031	0	0	0	0	0	0	0	0	0
gene11096	znf383.S	57.831	57.308	66.989	72.81	51.592	74.678	80.354	83.597	30.494	33.723	85.174	88.358	83.391	94.632	62.449	62.471	50.337	68.552	73.112	51.311	54.749	56.19	58.373	55.545	59.775	52.132	52.779	59.987	57.71	61.873	59.506	57.721	61.28	54.367	57.785	56.375	57.937	57	76.602	78.442	74.302	53.086	49.809	45.732	50.117	47.568	50.168	52.1
gene11097	cebpe.L	0	0	0.051	0	0.138	0	0	0	0.089	0	0.063	0	0	0	0	0	0.039	0.036	0	0	0	0.072	0.078	0.078	0	0	0	0	0.126	0	0	0.059	0	0	0	0	0	0	0.077	0	0.076	0	0	0	0	0.058	0	0.07
gene11098	hmgb1.L	68.768	67.412	47.604	61.023	54.722	84.853	56.819	64.792	62.015	73.559	59.207	67.28	62.854	68.137	72.865	76.068	70.653	80.677	74.448	83.363	61.679	60.691	71.923	74.298	74.44	66.6	63.673	67.261	67.316	66.926	69.868	66.716	65.993	60.213	66.254	59.73	57.746	65.479	53.859	70.141	71.53	60.065	73.456	63.421	76.913	70.611	69.396	68.576
gene11099	ing3.L	27.521	28.205	26.116	35.183	28.153	31.135	25.442	29.223	11.298	10.836	28.735	26.356	25.833	29.591	23.253	23.956	20.783	26.247	29.101	17.028	24.872	24.953	26.835	29.874	28.269	24.222	26.303	27.187	25.111	24.486	29.163	25.944	27.267	22.344	26.393	26.873	24.853	28.011	26.65	27.989	27.108	21.753	21.272	20.07	21.307	21.098	20.419	19.032
gene111	trim32l.S	0.031	0.033	0	0.105	0.218	0.215	0	0.094	0.07	0	0	0.047	0	0	0.043	0.039	0	0.029	0.039	0	0.109	0.057	0.062	0.185	0.083	0.056	0.06	0	0	0.096	0.048	0.047	0	0.147	0.056	0.045	0.219	0.141	0.122	0.062	0.06	0.108	0.242	0.117	0.119	0.138	0	0.056
gene1110	gatd3alc.2.L	0.613	1.535	22.431	25.992	3.421	3.381	0.339	0.926	5.76	2.181	0.582	0.559	1.739	1.07	15.253	16.366	18.51	11.647	8.79	10.178	0.86	0	0.728	0.725	1.469	1.315	17.092	21.616	21.643	18.801	24.425	27.917	23.048	17.865	17.932	16.909	27.772	21.705	2.148	2.424	1.656	1.056	0.95	0.46	1.638	0.722	0.836	0.654
gene11100	<NA>	26.546	25.36	27.335	26.966	16.718	14.198	26.24	23.834	14.804	12.716	25.175	23.387	27.206	27.103	24.708	24.96	30.738	28.166	26.893	28.391	15.375	15.854	14.066	14.728	14.169	14.389	21.727	21.067	18.467	20.075	18.774	20.551	21.866	22.886	19.707	22.974	26.293	22.376	23.201	17.696	23.345	22.517	22.488	23.925	22.044	22.67	23.434	23.402
gene11101	lrg1.L	0	0	0	0	0	0	0	0	0	0	0	0	0	0	0	0	0	0	0	0	0	0	0	0	0	0	0	0	0	0	0	0	0	0	0	0	0	0	0	0	0	0	0	0	0	0	0	0
gene11102	foxj2.L	3.916	4.427	0.052	0	0.142	0	0	0	0	0	0.065	0.062	0	0.119	0.733	0.303	0.119	0	0	0	0.143	0.149	0.081	0.322	0	0.365	3.554	3.348	4.412	3.003	3.276	3.483	3.804	1.918	3.683	6.329	7.02	4.468	0.079	0.081	0.236	0	0.063	0	0.156	0	0	0
gene11103	ercc6l.L	62.621	63.951	61.946	64.443	48.136	60.944	71.334	67.389	58.799	54.379	72.867	69.58	76.315	78.003	64.466	65.115	65.11	66.781	72.535	56.992	70.641	67.035	66.361	66.406	60.204	69.547	60.958	66.706	60.987	62.796	58.294	63.148	63.468	62.804	59.852	67.516	72.837	67.004	61.421	59.686	67.124	61.679	57.187	58.805	55.294	55.106	58.401	59.745
gene11104	<NA>	1.012	1.584	1.079	1.892	1.177	1.55	0.622	0.34	0.377	0.125	1.067	0.598	0.638	0.736	0.389	1.112	0.383	0.873	1.182	1	2.07	1.644	1.782	1.663	2.021	1.508	0.871	1.196	0.984	1.552	0.695	1.348	1.165	0.705	0.508	0.646	0.79	0.675	0.109	0.667	0.434	1.647	2.353	1.054	1.287	1.159	1.533	1.1
gene11105	dnajc19.L	168.906	172.594	164.492	183.528	152.433	129.624	143.585	161.794	120.259	145.383	145.393	150.702	140.229	154.665	129.826	127.763	158.984	149.454	146.514	191.177	138.739	142.466	139.21	141.324	150.22	146.776	128.851	136.755	149.357	130.43	148.688	139.803	139.016	133.887	124.791	157.267	141.403	143.562	169.388	176.764	154.64	185.236	190.996	174.244	197.987	208.107	180.139	179.23
gene11106	foxe1.S	0.054	0.057	0.035	0	0.19	0	0	0	0.122	0.061	0	0.041	0	0	0.075	0	0	0	0	0.04	0	0	0	0	0	0	0	0	0.13	0	0	0	0	0	0	0	0	0	0	0	0.053	0	0.042	0	0	0	0	0.048
gene11107	spata4.L	4.369	5.537	5.99	9.103	0.363	0.717	2.448	1.572	4.656	4.628	2.468	2.686	3.986	3.33	7.047	3.858	3.446	6.368	6.045	6.632	3.648	3.422	2.473	1.847	3.463	3.162	4.029	9.804	8.439	8.616	8.677	7.949	8.008	6.684	10.145	9.118	7.856	9.522	3.038	2.675	2.209	4.123	3.87	2.536	2.978	4.442	3.191	2.775
gene11108	ahnak.L	24.553	24.114	23.089	23.96	20.6	24.494	21.202	19.877	168.298	180.67	19.93	21.416	24.404	25.99	32.47	32.82	33.258	34.362	37.159	34.635	20.513	16.836	19.923	20.685	19.275	23.71	27.035	26.069	23.308	28.12	24.154	24.832	29.381	24.724	23.711	25.298	29.388	21.646	16.288	15.163	21.687	29.029	31.263	32.809	30.572	33.241	31.845	31.407
gene11109	lrrc15.L	0.101	0.026	0	0	0	0	0	0	0	0	0	0	0	0	0.07	0	0	0	0.094	0	0	0	0	0	0	0	0	0	0	0	0	0	0	0	0	0	0	0	0	0	0	0.087	0	0	0	0	0.043	0
gene1111	rnf125.L	0.117	0.091	0.448	0.393	0.305	0.402	0.202	0.265	0	0.13	0.277	0.266	0.166	0.085	0.081	0.036	0.114	0.107	0.289	0.173	0.409	0.533	0.347	0.115	0.155	0.157	0.678	0.311	0.418	0.313	0.225	0.306	0.475	0.32	0.422	0.21	0.154	0.131	0.227	0.173	0.225	0.251	0.136	0	0.446	0.129	0.199	0.104
gene11110	dvl1.L	0.417	0.435	1.152	0.739	0	0.076	0.699	0.597	0.049	0.195	0.59	0.5	0.903	0.351	0.121	0.244	0.428	0.481	0.651	0.586	0.577	0.16	0.609	0.909	0.526	0.432	0.553	0.1	0.314	0.168	0.17	0.329	0.227	0.344	0.04	0.41	0.308	0.296	0.641	0.521	0.678	1.248	0.919	1.111	0.963	1.196	1.608	1.054
gene11111	alpl.S	0.051	0	0.066	0.173	0	0.177	0.071	0.155	0	0	0	0.078	0.146	0.374	0	0	0	0	0	0	0.09	0.846	0	1.521	1.781	1.195	0	0.078	0	0.079	0.079	0.154	0.152	0	0.093	0	0	0	0	0.305	0.199	0	0	0	0	0	0	0.274
gene11112	aopep.L	10.305	9.707	9.448	9.411	7.89	8.124	8.436	10.111	5.695	5.451	8.795	9.02	10.477	11.611	9.383	8.778	11.509	9.788	9.478	9.456	8.703	9.991	9.335	9.481	9.456	7.303	6.693	8.119	7.596	7.903	7.668	7.532	7.396	7.927	7.944	7.042	8.166	8.533	9.725	10.626	7.337	8.447	7.256	7.6	7.135	9.021	5.943	6.984
gene11113	csrnp1.S	52.836	52.669	70.603	65.866	79.041	87.954	50.035	47.162	53.307	51.852	47.236	42.954	52.075	49.12	50.455	50.307	52.321	50.127	58.566	55.424	60.416	55.832	54.697	54.797	53.102	54.868	41.436	41.222	41.558	42.586	38.695	43.444	41.133	45.842	40.649	48.73	49.905	46.099	48.669	43.13	49.34	77.253	75.643	78.458	77.27	75.605	77.754	78.133
gene11114	sall4.L	253.604	253.401	277.152	275.915	243.94	286.975	344.756	327.833	283.178	299.484	340.711	312.036	329.449	308.083	283.997	284.461	269.371	277.12	287.608	253.833	262.975	243.274	228.403	214.125	203.211	223.255	262.796	282.902	271.304	256.276	226.097	263.505	262.649	282.542	245.506	255.76	287.359	259.423	286.807	250.371	261.435	235.432	227.556	240.983	213.503	223.828	236.235	237.611
gene11115	<NA>	0	0	0	0	0	0	0.042	0	0.136	0.203	0	0.046	0	0	0	0	0	0	0	0	0	0	0	0	0.04	0	0.059	0.138	0	0.047	0	0.045	0.045	0	0	0	0	0	0.059	0.06	0	0	0	0	0	0	0	0
gene11116	ikbkg.L	50.012	47.388	42.909	45.571	47.428	43.103	47.926	51.62	17.148	18.328	52.304	48.571	55.35	53.399	51.062	49.574	58.768	53.376	49.578	53.904	49.294	44.856	42.342	45.568	40.744	45.534	39.498	41.34	40.873	43.565	36.399	45.493	41.797	45.597	44.016	41.973	43.41	48.157	44.417	45.582	47.04	56.301	56.437	55.104	56.408	54.801	53.313	56.658
gene11117	fam189a2.L	26.778	27.452	30.453	29.819	38.109	27.942	30.463	27.131	12.802	13.433	28.841	32.587	30.782	30.695	29.003	26.915	29.493	30.091	31.24	35.756	21.523	23.017	23.452	22.881	21.164	21.382	34.083	31.647	30.017	27.481	31.297	31.846	35.879	34.68	30.998	37.677	37.19	36.128	30.474	29.781	31.516	46.765	45.875	47.162	46.63	43.989	45.631	44.792
gene11118	cebpa.S	18.715	19.979	14.842	10.059	23.082	24.531	6.943	6.128	8.439	10.21	6.64	5.458	3.988	4.659	8.264	9.148	6.482	6.468	9.985	9.39	6.549	7.022	6.413	7.789	9.524	9.351	8.543	7.896	8.828	7.421	9.397	9.702	8.849	8.029	9.831	10.582	11.872	9.45	7.48	4.996	10.575	26.55	23.27	19.816	22.95	25.04	23.342	23.219
gene11119	atp13a5.L	0	0.02	0.024	0.064	0.133	0	0.079	0.173	0.511	0.381	0.03	0.173	0.027	0.028	0	0.094	0.074	0	0.118	0.028	0	0	0	0	0	0	0.074	0	0	0	0	0.029	0	0.03	0	0	0	0	0.111	0.113	0.037	0.066	0.089	0	0.109	0.056	0.097	0.068
gene1112	yars1.S	24.117	25.172	27.03	28.09	16.864	13.692	33.06	27.827	18.933	20.102	29.13	30.862	33.977	33.833	21.088	22.627	22.205	25.556	26.045	24.151	23.411	23.352	22.233	22.363	15.714	17.187	26.751	29.223	25.817	27.631	29.161	24.578	31.273	29.586	28.587	27.788	33.46	29.711	30.814	25.842	31.217	23.112	24.8	23.422	26.033	24.237	22.951	22.722
gene11120	tnfrsf12a.S	0.629	0.188	0.46	0.605	0	0	0	0	0	0	0	0	0.128	0.262	0.373	0.111	0	0	0.445	0	0.158	0.164	0	0	0	0	0	0	0	0	0	0	0	0.141	0	0	0.158	0	0	0	0.174	0	0	0	0	0	0.153	0.16
gene11121	mafb.L	0.06	0.126	0.155	0	0.316	0.312	1.045	1.232	1.014	0.605	1.147	1.331	0.129	0.044	2.882	3.137	0.147	0.028	0.635	0.762	0.636	1.27	1.017	1.907	0.966	2.647	0.527	0.321	0.433	0.417	0.42	0.272	0.805	0.331	0.928	0.043	0.053	0	2.823	1.315	2.333	0.26	0.187	0.17	0.519	0.089	0.927	0.322
gene11122	ptger1.L	0	0	0	0	0	0	0	0	0	0	0.083	0	0	0.077	0	0	0	0	0	0	0	0	0	0	0	0	0	0	0	0	0	0	0	0.083	0	0	0	0	0	0	0	0	0	0	0	0	0	0
gene11123	<NA>	7.12	8.265	7.323	6.047	1.625	2.982	3.223	2.212	2.234	2.072	1.789	2.325	2.644	3.001	2.944	3.208	2.723	4.012	5.265	7.202	3.267	3.648	1.977	1.706	2.659	3.093	1.546	2.428	1.905	1.633	1.645	0.199	0.887	1.147	0.961	2.39	2.571	2.396	4.793	4.343	2.055	4.817	4.435	5.116	4.445	5.291	3.062	4.497
gene11124	susd2.L	3.513	3.645	2.584	1.699	0.66	0.798	0.058	0.032	1.553	1.825	0.1	0	0.06	0.122	2.647	3.381	2.972	2.595	2.653	1.528	0.074	0.077	0	0.041	0.14	0.075	1.67	1.535	1.64	1.71	1.82	1.607	2.118	2.077	1.064	2.146	2.438	1.926	0.041	0.042	0	2.828	4.141	4.103	4.336	4.615	4.373	3.329
gene11125	<NA>	0	0	0	0	0	0	0	0	0	0	0	0	0	0	0	0	0	0	0	0	0	0	0	0	0	0	0	0	0	0	0	0	0	0	0	0	0	0	0	0	0	0	0	0	0	0	0	0
gene11126	<NA>	0	0	0	0	0	0	0.117	0	0	0	0.201	0	0	0	0	0	0	0	0	0	0	0.077	0	0.084	0.056	0	0.164	0	0	0	0	0	0	0	0	0.061	0	0	0	0	0	0	0.066	0	0.081	0	0	0
gene11127	nr3c1.L	21.331	21.408	20.333	19.668	26.708	26.696	25.498	25.486	9.115	8.389	26.292	25.12	27.409	28.103	16.815	18.096	14.835	17.226	18.631	14.768	21.65	18.992	21.155	20.496	21.487	20.871	20.598	21.945	22.711	22.517	20.853	22.039	21.245	22.962	21.861	21.736	22.32	22.505	22.136	21.948	22.724	17.339	15.615	17.733	15.822	17.165	16.237	17.072
gene11128	erbb3.S	0.612	0.566	0.285	0.562	1.893	1.727	1.233	0.883	2.335	1.579	1.276	1.268	0.731	1.377	0.308	0.533	0.38	0.369	0.946	0.619	0.439	0.585	0.138	0.439	0.408	0.697	0.62	0.571	1.062	0.811	1.461	0.688	0.783	0.829	0.98	0.7	0.538	0.501	0.704	1.128	0.859	2.926	3.019	2.844	2.204	2.93	2.561	2.029
gene11129	chrm2.L	0	0	0	0	0	0	0	0	0	0	0	0	0	0	0	0	0	0	0	0.145	0	0	0	0	0	0	0	0	0	0.05	0	0	0	0	0	0	0	0	0	0	0	0	0	0	0	0	0	0
gene1113	rs1.S	0.254	0.133	0	0	0	0	0.352	0.48	0	0	0.301	0.482	0.18	0.092	0.088	0.236	0.062	0.116	0	0	0	0	0.377	0	0	0.114	0.123	0.193	0	0.487	0	0	0.282	0.199	0	0.274	0.223	0.191	0.742	0.754	0.613	0.109	0.098	0	0	0	0	0
gene11130	nkx2-5.L	0	0	0	0	0	0	0	0	0.604	0.721	0.085	0	0	0	0	0	0	0	0	0	0	0	0	0	0	0.193	0	0	0	0	0	0	0	0	0	0	0	0	0	0	0	0	0	0	0	0	0.092	0
gene11131	osgepl1.L	26.264	26.732	34.978	37.301	17.867	15.412	21.591	23.92	9.378	10.255	23.42	24.261	20.749	25.949	15.645	16.464	17.692	18.294	19.344	15.051	26.124	28.765	27.211	24.705	25.922	25.811	16.142	16.635	15.406	18.069	18.269	17.931	15.649	18.536	16.231	19.136	21.018	23.758	22.21	22.749	19.144	17.575	16.961	15.631	14.041	18.169	16.585	14.326
gene11132	gpatch8.L	0.728	0.523	0.505	0.255	0.212	0.105	0.567	0.55	1.019	1.013	0.456	0.392	0.323	0.464	0.462	0.6	0.739	0.665	0.619	0.562	0.16	0.083	0.09	0.329	0.323	0.19	0.441	0.392	0.314	0.442	0.328	0.205	0.404	0.523	0.384	0.262	0.293	0.114	0.561	0.33	0.439	0.654	0.847	0.598	0.695	0.737	0.672	0.405
gene11133	glra1.S	0	0	0	0	0	0	0	0	0	0	0	0.047	0	0	0	0.076	0	0	0	0	0	0	0	0	0	0	0	0	0	0	0	0	0	0	0	0	0	0	0	0	0	0	0	0	0	0	0	0
gene11134	gsto1.S	7.008	6.908	4.359	2.948	0.679	2.013	3.098	2.794	5.663	6.062	2.309	1.478	1.381	1.416	2.153	2.527	3.319	3.379	4.332	3.608	1.024	3.024	0.964	3.071	2.333	1.914	1.508	1.036	2.013	1.642	1.353	0.875	0.72	0.458	1.582	2.098	1.367	2.921	2.274	3.273	2.066	9.226	13.124	10.951	7.43	10.175	9.62	7.442
gene11135	fam110c.L	13.017	12.255	18.234	19.213	21.118	18.114	25.288	22.868	16.306	15.392	20.689	21.611	7.425	7.267	18.625	20.556	6.404	7.368	15.291	18.915	31.009	29.677	30.239	25.289	26.751	26.444	24.789	20.116	21.496	17.212	17.267	19.244	15.878	16.095	14.332	12.552	15.456	11.161	18.521	19.416	16.318	19.825	23.124	19.99	22.902	18.974	21.997	17.803
gene11136	klf15.L	0.531	0.639	2.22	3.297	1.353	2.181	1.836	1.542	0.046	0.182	2.033	2.015	1.593	2.138	2.144	1.917	1.571	2.088	2.7	2.421	0.93	0.858	0.728	0.805	0.761	0.803	3.834	3.816	2.986	3.506	2.585	3.363	2.87	3.678	3.244	3.753	3.692	4.196	1.51	1.493	1.379	0.879	1.17	1.11	1.091	1.112	1.113	1.016
gene11137	tmco1.S	134.834	137.182	123.073	124.72	136.272	144.736	145.986	142.48	184.788	182.922	146.404	136.077	159.62	154.173	125.014	115.725	120.064	128.065	135.21	120.688	123.24	135.824	135.672	134.673	118.106	122.091	136.801	149.264	144.373	148.258	132.053	139.32	144.034	139.415	144.252	134.806	135.035	144.428	136.578	141.366	144.383	116.124	113.36	107.099	116.939	106.974	113.993	110.072
gene11138	tmem229bl.L	0	0	0	0	0	0	0	0	0.094	0.093	0	0.032	0	0	0	0	0	0	0	0	0	0	0	0.041	0.028	0	0	0.096	0	0	0	0	0	0	0.076	0	0	0	0	0	0	0	0	0	0	0	0	0
gene11139	skap1.S	7.532	9.358	8.643	11.668	5.004	1.442	9.017	7.495	4.548	3.989	7.09	7.082	7.803	10.349	5.372	5.838	4.076	5.679	4.434	6.824	3.773	2.185	3.315	2.476	2.866	2.565	5.44	5.088	6.085	7.609	6.555	6.627	5.84	4.871	4.966	7.386	6.299	4.933	7.331	10.994	7.037	4.636	4.262	4.372	6.844	5.456	4.38	3.933
gene1114	pgam1.S	112.266	111.718	106.132	110.279	109.9	112.731	118.915	133.509	41.622	39.315	135.465	129.902	136.855	151.108	134.715	129.127	143.029	145.26	127.174	139.265	115.584	124.358	126.924	121.804	124.208	126.639	133.825	139.462	143.506	154.618	129.643	134.779	142.095	136.201	148.597	136.959	154.034	146.309	129.507	137.334	134.658	176.135	178.819	153.302	174.835	176.013	172.241	168.558
gene11140	pak5.S	0	0	1.623	2.298	1.106	0.925	0.101	0.037	0	0	0.039	0.074	0	0.035	0	0	0.024	0	0	0	0.128	0.045	0.097	0.048	0.13	0.131	0.047	0.297	0.31	0.075	0.075	0.146	0.036	0.268	0.088	0.105	0.471	0.183	0.095	0.048	0.047	0	0	0	0	0	0	0
gene11141	vps33b.L	18.631	18.421	17.053	18.624	14.39	16.594	13.958	13.555	4.03	3.496	12.946	15.816	13.846	14.244	12.902	10.524	10.718	13.013	17.124	13.156	16.992	18.73	17.901	15.111	17.268	15.69	14.013	15.679	16.405	16.422	15.83	19.133	14.833	14.265	14.784	15.149	17.769	18.081	12.812	13.6	14.978	13.261	11.063	11.973	10.81	13.161	12.052	13.45
gene11142	<NA>	0.155	0.129	0.04	0	0	0	0	0	0	0	0	0	0	0	0	0.076	0	0	0	0.046	0	0	0	0.061	0	0	0	0	0	0	0	0	0	0	0	0	0	0	0.12	0	0	0.053	0	0	0	0	0	0
gene11143	plpp6.L	28.841	28.797	25.055	28.742	24.095	28.125	22.641	21.386	5.406	6.222	22.789	21.211	23.965	23.432	28.389	27.794	26.94	30.143	33.429	33.083	25.596	25.908	27.452	26.58	27.232	26.939	26.591	29.119	29.627	29.965	26.315	28.352	28.234	29.023	27.402	28.103	30.145	27.727	22.895	22.967	23.926	27.864	31.299	31.075	31.301	30.576	27.768	28.826
gene11144	ndufa11.S	20.903	22.023	18.925	10.619	18.571	7.478	3.002	5.065	4.854	1.755	4.054	4.493	5.317	4.017	2.726	3.413	3.842	3.603	5.607	4.97	6.223	5.766	10.156	9.334	7.879	8.462	8.019	4.496	7.214	7.561	6.396	5.614	4.963	4.326	3.918	7.65	11.775	13.316	5.758	8.971	5.329	6.797	5.807	6.287	7.903	6.097	5.377	3.156
gene11145	mosmo.L	63.056	62.352	61.91	52.75	75.583	78.307	49.671	50.995	41.272	41.938	48.137	48.992	53.44	47.854	48.991	52.228	51.116	53	67.622	73.418	76.458	77.211	75.679	69.975	69.514	66.849	52.52	52.828	49.641	48.215	48.978	45.671	51.988	51.471	54.478	60.117	66.619	64.555	54.212	52.742	53.485	67.643	69.423	68.749	74.559	68.358	64.562	73.836
gene11146	metap1.L	69.572	68.086	69.357	70.979	72.806	80.146	66.771	71.91	39.657	42.927	71.691	70.459	75.228	79.269	62.881	64.417	64.011	71.783	75.017	67.273	72.016	75.11	66.531	73.565	73.39	72.906	86.444	87.708	88.616	81.375	77.185	80.303	80.787	84.805	82.218	81.415	87.761	83.471	62.15	63.569	64.326	64.022	62.963	64.564	61.998	60.544	64.701	65.139
gene11147	<NA>	0.524	0.456	0.251	0.441	0.152	0.075	0.242	0.297	0.44	0.194	0.242	0.298	0.31	0.476	0.423	0.459	0.425	0.439	0.648	0.324	0.115	0.08	0.13	0.344	0.233	0.117	0.127	0.265	0.347	0.268	0.27	0.229	0.065	0.342	0.394	0.314	0.422	0.164	0.382	0.13	0.295	0.414	0.474	0.655	0.167	0.225	0.298	0.311
gene11148	npm3.L	72.538	76.937	57.918	65.485	50.232	64.847	83.796	94.581	62.874	64.202	86.457	99.553	95.256	106.05	66.804	70.923	69.233	87.106	84.591	76.085	81.206	79.495	88.143	81.964	87.519	80.823	101.424	101.15	103.875	104.038	111.586	104.275	107.648	105.843	109.664	96.538	98.589	91.028	79.989	107.424	95.074	86.513	82.541	87.744	86.491	88.018	88.046	83.1
gene11149	tpt1.L	381.964	391.059	376.482	402.445	320.352	341.539	461.346	521.408	642.783	671.555	488.676	531.917	436.611	449.944	416.855	420.442	368.868	399.505	374.527	386.617	360.151	378.641	363.602	399.254	395.893	378.247	405.758	402.813	400.677	433.67	454.845	437.201	454.459	417.203	422.03	349.51	351.181	373.212	483.805	506.59	513.082	349.097	353.6	346.298	347.078	350.478	342.63	333.588
gene1115	yipf3.L	20.215	18.253	22.318	24.683	18.037	19.124	17.697	15.199	9.994	8.889	15.688	15.638	17.611	15.253	16.249	19.469	24.456	18.769	20.458	30.32	23.159	22.595	18.81	17.802	20.222	20.846	17.843	18.08	16.974	18.53	17.863	16.2	16.495	18.27	15.452	21.75	21.879	20.246	18.578	18.689	16.241	29.247	29.873	30.855	30.504	27.686	27.077	31.599
gene11150	<NA>	2.24	2.727	0.955	2.199	2.279	0.643	0.904	0.846	1.044	0	0.886	0.851	1.324	1.222	3.355	3.346	1.364	2.132	0.923	2.214	3.599	2.558	2.588	2.761	3.977	2.67	1.265	0.709	0.148	0.143	0.721	0.419	1.105	1.463	0.674	0.67	1.147	1.12	0.363	1.292	1.801	0.804	0.868	1.225	0.712	1.511	0.954	0.664
gene11151	XB5994047.L [provisional]	23.292	25.565	22.432	27.897	27.176	22.431	8.661	10.081	1.113	2.674	8.914	10.45	11.174	11.818	21.946	19.161	24.225	25.217	24.799	33.059	32.914	33.704	35.3	35.065	41.56	31.863	21.107	20.286	18.128	20.276	19.908	20.18	19.756	20.913	23.353	20.782	19.652	21.02	10.004	9.59	10.239	14.856	16.315	13.212	15.265	14.706	15.89	12.602
gene11152	abo.6.L	0.019	0	0	0	0.067	0.067	0.027	0.058	0.086	0.043	0.031	0	0	0	0.107	0.048	0	0.018	0.024	0.029	0.034	0.071	0	0.038	0	0	0	0	0	0	0.09	0.087	0.114	0.03	0	0	0.068	0	0	0	0	0.033	0.03	0	0	0	0.033	0
gene11153	kcnq1.L	7.108	6.916	8.821	6.701	7.729	9.078	6.459	5.919	13.414	13.572	6.23	5.739	6.805	6.557	6.423	7.331	7.008	6.846	8.152	7.808	5.949	6.514	6.509	5.109	4.576	4.88	6.177	6.541	5.84	6.288	5.655	6.158	6.529	6.576	5.877	7.26	8.14	6.489	6.418	5.653	7.107	7.305	7.714	8.33	7.334	7.864	7.916	7.785
gene11154	slurp1l.S	0	0	0	0	0	0	0	0	0	0	0	0	0	0	0	0	0	0	0	0	0	0	0	0	0	0	0	0	0	0	0	0	0	0	0	0	0	0	0	0	0	0	0	0	0	0	0	0
gene11155	gnat1.L	0	0.044	0	0	0	0	0	0	0.281	0.837	0	0	0	0	0	0	0	0	0	0	0.073	0	0	0	0	0	0	0	0	0	0	0	0	0	0	0	0.073	0.125	0	0	0	0	0.065	0	0	0	0	0
gene11156	smurf1.L	70.326	70.309	72.527	72.138	71.946	85.185	56.458	53.97	24.607	21.971	57.329	56.335	64.145	58.753	48.046	46.684	47.438	53.707	60.853	56.406	57.259	56.138	57.554	57.207	53.624	54.511	49.444	51.8	49.567	51.127	44.04	51.252	45.16	50.77	47.301	54.355	55.885	56.617	46.757	45.712	48.231	53.676	48.273	53.067	49.544	49.493	51.195	50.116
gene11157	pltp.L	0	0	0	0	0	0	0.071	0	0	0.114	0	0	0	0	0	0	0	0	0	0	0	0	0	0	0	0	0	0	0	0	0	0	0	0	0	0	0	0	0	0.101	0	0	0	0	0	0	0	0
gene11158	pdcd1.L	0.783	0.778	0.763	1.003	0.52	0.642	0.464	0.788	0.167	0.083	0.648	0.509	0.846	0.488	0.155	0.415	0.545	0.374	0.599	0.442	0.392	0.545	0.738	0.735	0.744	0.666	0.289	0.453	0.474	0.571	0.633	0.223	0.662	0.35	0.538	0.535	0.72	1.118	0.363	0.737	0.575	0.771	0.635	0.349	0.427	0.384	0.571	0.331
gene11159	znf469.S	0.255	0.313	0.72	0.505	0.523	0.75	0.675	0.725	0.319	0.15	0.806	0.615	0.745	0.785	0.435	0.287	0.285	0.48	0.677	0.356	0.381	0.384	0.772	0.532	0.509	0.362	2.396	2.314	2.516	2.668	2.27	2.078	2.076	2.338	1.638	1.972	2.568	2.599	0.569	0.356	0.651	0.271	0.256	0.337	0.072	0.331	0.256	0.16
gene1116	tmprss4.L	37.483	40.298	45.045	42.874	28.524	30.452	37.148	35.561	38.653	42.155	37.06	36.349	35.594	42.75	33.956	35.222	37.843	36.183	43.034	44.031	7.674	8.479	12.253	8.892	8.029	9.561	31.825	33.867	30.018	29.507	29.393	28.904	33.178	31.505	29.35	36.645	44.054	39.843	35.821	35.096	36.02	33.201	34.449	33.867	36.466	34.231	33.722	35.33
gene11160	rcc1.L	275.954	270.522	243.001	252.343	250.007	253.178	286.224	300.905	273.758	292.243	291.329	307.324	301.729	308.517	257.306	263.476	272.528	302.439	266.013	257.372	310.506	327.726	325.319	313.747	322.596	320.635	285.656	294.581	305.362	305.949	288.645	300.773	284.42	304.396	302.892	272.471	282.32	297.979	272.385	276.732	273.019	271.897	259.794	254.927	242.615	259.307	269.385	265.202
gene11161	abcb6.L	29.259	29.981	25.088	25.145	21.689	25.917	28.837	26.676	15.836	16.568	29.833	27.242	33.484	32.172	28.101	31.15	31.487	29.677	30.435	31.615	28.8	24.721	26.473	26.724	25.369	26.094	28.891	28.322	26.941	30.106	25.768	27.463	30.846	29.525	27.74	28.371	34.311	28.898	29.45	25.102	28.571	34.628	31.717	33.329	32.236	32.659	31.867	33.75
gene11162	cdk1.L	179.936	186.5	179.102	179.592	184.846	173.717	84.237	77.547	42.678	41.729	68.896	78.042	69.137	78.849	63.472	61.97	65.842	66.412	144.889	147.182	152.656	160.941	155.14	135.557	142.332	137.427	91.727	92.916	90.758	66.734	58.756	68.08	39.267	55.938	57.784	123.765	114.762	132.224	93.024	112.957	71.609	206.37	197.466	187.425	191.534	186.974	183.543	164.476
gene11163	znf318.S	40.57	39.206	34.633	29.513	37.496	38.611	26.315	27.069	20.031	20.037	29.514	25.08	31.765	31.834	23.334	24.72	24.614	24.701	26.234	19.543	28.455	26.426	26.695	23.253	22.046	25.679	21.362	20.934	20.921	22.156	21.51	23.391	24.029	25.655	22.359	29.177	27.049	24.924	29.326	21.262	28.831	25.84	22.194	23.717	24.217	22.739	26.245	24.164
gene11164	tspear.S	0	0.087	0	0	0	0	0.058	0	0	0.185	0	0	0	0	0.058	0.258	0	0.114	0	0.185	0.073	0.305	0.578	0.329	0.61	0.298	0	0	0	0	0.064	0	0	0	0	0	0	0	0	0	0	0	0	0	0	0	0	0
gene11165	daam2.S	0.068	0.051	0.012	0.033	0.034	0.033	0.027	0.015	0.043	0	0.046	0	0.041	0	0	0.012	0.028	0	0.036	0.029	0.017	0	0.058	0	0.013	0.035	0.019	0.029	0.031	0.059	0	0.029	0.014	0.046	0	0	0.017	0	0	0	0.037	0.084	0.015	0.091	0	0.057	0.066	0.017
gene11166	qars1.L	32.422	33.174	10.78	10.024	12.763	12.468	25.027	25.584	13.71	10.695	23.955	25.334	22.882	24.948	23.119	23.722	25.367	26.161	32.245	31.29	18.052	19.206	20.227	17.37	16.149	17.269	21.752	21.15	23.213	19.903	18.27	19.188	20.346	20.47	19.748	25.126	26.153	25.219	25.18	21.543	24.226	34.61	33.104	36.304	36.783	31.26	33.787	31.248
gene11167	psmd3.L	37.696	40.215	41.345	41.992	46.693	40.921	37.318	38.846	31.568	39.902	35.026	38.19	40.952	43.258	42.207	45.381	44.777	47.292	47.26	52.179	25.863	26.059	28.17	26.402	23.838	30.581	48.249	46.464	45.602	48.624	45.806	48.864	54.066	54.675	45.683	52.365	61.141	49.792	38.759	33.227	38.573	52.807	50.724	58.244	50.589	52.318	54.218	52.398
gene11168	slc22a18.L	0.495	0.345	1.338	0.556	0.96	0.569	0.381	0.499	0.123	0.245	0.261	0.167	0.234	0.32	0.381	0.272	0.161	0.101	0.068	0.245	0.29	0.302	1.09	0.326	1.1	0.492	0.959	1.088	0.35	1.013	0.68	0.247	0.407	0.345	0.994	0.395	0.58	0.991	0.321	0.435	0.425	0.379	0.341	0.206	0.735	0.243	0.75	0.392
gene11169	cda.S	0	0	0	0	0	0	0.145	0	0	0.234	0	0	0	0	0	0	0	0	0.26	0	0	0	0	0	0	0	0	0	0.167	0	0	0	0	0	0.19	0	0	0	0.205	0	0	0	0	0	0	0	0	0
gene1117	olig4.L	0	0	0	0	0	0	0	0.306	1.816	2.256	0	0.154	0	0	0.561	0	0	0	0	0.15	0.178	0	0	0	0	0	0	0	0	0	0.157	0	0.3	0.159	0	0	0	0	0	0	0.587	0	0	0	0.194	0.149	0	0
gene11170	cenpu.L	13.388	14.935	14.946	14.959	9.925	17.378	20.705	22.929	10.006	12.238	22.202	24.081	22.612	24.171	15.025	13.636	13.227	15.995	15.881	13.541	17.817	19.464	20.668	19.723	19.959	20.739	14.012	13.554	14.225	15.628	14.86	13.968	13.481	14.992	14.341	13.824	14.755	14.396	16.25	21.869	21.864	13.591	12.979	11.892	11.016	14.006	13.208	10.795
gene11171	fam53c.L	4.095	4.123	3.255	4.385	3.534	4.206	23.699	21.715	1.759	2.576	24.399	22.899	25.296	25.064	2.716	2.352	2.317	2.966	3.656	2.852	5.33	5.14	5.039	5.384	5.728	4.955	2.563	2.295	2.171	2.759	1.98	2.386	3.153	2.366	1.905	2.615	3.269	2.824	22.948	20.083	23.19	21.348	24.712	24.161	24.075	22.989	24.739	22.763
gene11172	stk32a.L	0.087	0.227	0.223	0.293	0.152	0.15	0	0	0	0	0	0.331	0.124	0.317	0.241	0.054	0.042	0.119	0	0	0.153	0.08	0.173	0	0	0	0	0.066	0	0	0	0.065	0	0	0	0.063	0	0.065	0.085	0	0.084	0.45	0.405	0.49	0.249	0.064	0.297	0.465
gene11173	<NA>	0	0	0	0	0	0	0	0	0	0	0	0	0	0	0	0	0	0	0	0.238	0	0	0	0	0	0	0	0.122	0	0	0	0	0	0	0	0	0	0	0	0	0	0	0	0	0	0	0	0
gene11174	urpta-1.S	0.349	0.073	0.179	0	0.244	0.241	0.387	0.106	0.156	0.155	0.442	0.318	0.297	0.305	0.483	0.259	0.204	0.064	0	0	0.122	0	0	0.276	0	0.125	0.271	0.106	0.778	0.536	0.216	0.314	0.207	0.109	0.631	0.201	0	0.315	0.136	0	0.135	0.241	0.108	0.131	0	0	0	0.124
gene11175	eif2b3.L	39.235	38.196	31.24	32.628	30.273	37.446	31.331	34.048	14.084	16.936	33.875	39.935	35.652	38.992	42.877	38.777	39.953	38.21	40.474	55.388	33.458	37.104	40.216	39.041	45.491	38.57	27.325	26.696	26.077	27.635	29.948	27.909	25.022	23.465	30.159	31.651	28.614	32.902	33.793	35.336	36.443	44.786	48.852	43.213	47.851	46.557	45.84	39.533
gene11176	msh4.L	0.056	0.029	0	0	0	0	0.117	0.085	0	0.063	0.134	0.128	0.04	0.041	0.078	0.278	0.082	0.051	0	0.042	0.543	0.36	0.558	0.278	0.45	0.252	0	0	0.045	0.043	0.13	0.169	0.125	0.397	0.203	0	0	0.127	0	0	0.054	0	0	0	0.107	0	0.048	0
gene11177	exosc8.L	0.572	0.682	0.836	1.375	1.425	0.845	1.696	1.851	0.731	0.363	1.68	2.109	1.739	2.139	2.937	0.909	1.433	1.866	1.818	1.938	1.146	0.597	1.456	1.289	0.653	0.292	1.582	1.118	1.04	1.504	0.631	1.469	2.661	1.536	1.77	1.174	2.009	0.981	2.067	2.908	1.261	2.393	3.039	3.83	2.183	2.165	2.227	2.47
gene11178	foxn2.S	61.056	60.279	80.222	69.538	75.064	80.073	65.067	61.09	40.828	42.529	67.273	60.609	73.663	68.163	63.395	67.886	65.13	61.714	67.52	63.573	74.98	66.29	65.66	68.39	62.572	65.221	54.941	59.765	53.245	54.899	51.495	61.727	57.034	61.12	52.496	63.06	64.998	56.313	65.3	53.306	68.956	65.804	66.773	71.962	70.552	71.409	73.252	71.879
gene11179	n4bp1.L	67.171	65.756	61.246	61.153	54.385	60.026	72.154	72.847	39.641	43.51	72.339	74.619	75.771	79.896	69.528	67.229	64.821	70.578	70.796	62.347	45.367	52.51	53.411	52.033	47.587	49.251	67.24	72.526	70.663	71.315	67.215	66.864	70.41	72.749	67.09	64.088	65.507	67.991	69.022	69.673	69.26	69.508	70.735	70.042	70.122	73.336	72.819	69.743
gene1118	kti12.L	69.319	61.179	67.11	74.801	57.975	64.898	79.208	82.374	58.89	60.082	80.653	80.521	88.446	86.748	69.985	66.001	64.095	68.506	77.682	64.877	45.586	48.44	48.763	44.205	45.864	45.141	72.421	76.373	70.4	68.945	68.559	73.483	80.905	71.827	68.11	74.18	68.555	67.927	75.868	80.068	75.462	65.753	66.354	64.936	59.236	62.2	67.912	59.113
gene11180	mgc145260.S	1.898	2.043	0.329	0.133	0.483	0.273	0.192	0.239	0.177	0.132	0.188	0.09	0.253	0.345	0.191	0.244	0.308	0.307	0.269	0.235	0.589	0.398	0.392	0.273	0.632	0.636	0	0.03	0	0.121	0.061	0.03	0.029	0.062	0	0.028	0.069	0	0.231	0.196	0.344	2.658	3.187	2.967	3.774	3.086	3.403	2.673
gene11181	<NA>	0	0.018	0	0	0	0	0	0	0.078	0	0	0.026	0	0.025	0.024	0.043	0.051	0.048	0.021	0.206	0.03	0	0.034	0	0.023	0.062	0.067	0.079	0	0.053	0	0.026	0	0.027	0.031	0	0.061	0.026	0	0	0	0.03	0	0	0.033	0	0.03	0.093
gene11182	ggt1.S	0.177	0.222	0.545	0.358	0.247	0.122	0.196	0.482	1.111	1.421	0.786	0.485	1.208	0.929	5.249	5	6.118	5.121	4.299	3.314	0.311	0.065	0.281	0.21	0.094	0.127	0.756	0.701	0.508	0.435	0.548	0.478	0.21	0.778	1.346	0.561	0.748	1.118	0.553	0.772	0.685	1.223	0.99	1.663	1.693	1.776	1.753	1.703
gene11183	kiaa0319l.S	78.397	75.763	80.494	77.835	61.752	67.424	87.101	75.646	55.154	60.243	82.424	84.035	89.891	85.607	77.601	81.389	88.77	84.815	82.217	75.344	73.764	70.777	68.878	70.926	66.901	66.574	72.104	73.252	72.336	73.016	67.553	74.23	75.559	78.334	71.792	76.752	78.412	75.008	71.354	74.025	76.67	79.186	73.1	76.464	68.894	75.186	73.961	71.081
gene11184	spic.S	0	0	0	0	0	0	0	0	0	0	0	0	0	0	0	0	0	0	0	0	0	0	0	0	0	0	0	0	0	0	0	0	0	0	0	0	0	0	0	0	0	0	0	0	0	0	0	0
gene11185	syndig1.L	0	0	0	0	0	0	0	0.151	0	0	0.394	0.076	0	0.217	0	0	0.049	0	0	0	0	0	0	0	0.066	0	0	0.076	0	0	0	0.075	0	0	0	0	0	0	0	0	0	0	0.077	0.187	0	0.22	0	0
gene11186	cinp.L	27.285	29.446	22.946	26.535	23.186	26.114	12.623	13.78	5.708	8.081	12.591	14.323	11.187	13.158	12.183	12.613	9.262	11.581	18.634	14.096	19.107	22.177	21.894	21.647	21.616	17.137	14.669	14.569	18.441	14.581	13.61	14.476	13.159	12.234	13.401	19.658	17.919	21.341	13.241	12.994	12.233	12.788	14.495	13.625	17.111	17.412	15.542	15.394
gene11187	<NA>	0.378	0.132	0.161	1.274	0	0.435	0.698	1.524	0.282	1.403	1.596	1.341	0	0.551	1.221	1.403	0	0	0.312	0.187	2.432	3.458	1.249	4.478	2.184	5.638	3.419	2.492	2.407	1.548	0.779	2.835	0.747	2.372	3.417	0.181	0.665	0.379	1.473	1.746	1.461	1.087	0.782	0	0.963	0.371	0.215	0.224
gene11188	rpa2.L	64.689	66.962	48.32	52.728	49.373	61.568	57.035	59.655	20.72	19.887	57.801	62.853	60.289	64.572	54.268	55.075	54.475	60.518	58.211	66.465	49.483	53.527	57.638	54.953	66.361	58.801	58.698	58.048	57.388	62.975	66.381	62.508	65.484	62.245	66.006	58.936	59.925	67.874	51.176	63.276	54.805	51.761	57.503	52.93	59.228	57.321	52.667	53.635
gene11189	mgat4c.L	0	0	0	0	0	0	0	0	0	0	0	0	0	0	0	0	0	0.036	0.024	0	0	0	0	0	0	0	0	0.089	0.062	0.06	0	0.029	0	0	0	0	0	0	0	0	0	0	0	0	0	0	0	0
gene1119	ggt7.L	0.056	0.116	0.107	0	0.097	0.192	0.269	0.378	1.555	1.793	0.44	0.38	0.237	0.121	0.346	0.241	0.081	0.178	0.069	0.33	0.292	0.203	0.385	0.164	0.074	0.199	2.907	2.197	2.609	2.302	2.834	3.04	3.704	3.354	2.711	3.195	3.417	3.212	0.054	0.11	0.322	0.24	0.086	0	0	0.082	0.189	0.049
gene11190	sfmbt2.S	0.471	0.501	0.767	0.621	2.381	2.926	0.855	1.101	0.991	1.313	1.765	0.841	1.231	1.383	3.316	3.592	3.415	3.548	3.638	3.488	4.092	5.665	4.075	4.512	4.62	4.14	2.251	1.921	3.052	2.264	1.81	2.391	2.24	3.267	2.749	2.81	3.662	3.419	0.898	1.259	1.086	3.514	2.945	3.944	3.574	3.64	3.474	3.183
gene11191	c15orf61.L	12.179	12.711	10.301	8.105	13.199	11.386	6.666	8.732	5.543	5.357	8.27	7.107	8.006	7.908	6.183	7.485	8.58	8.046	9.017	6.223	13.51	11.065	10.222	11.942	10.263	12.302	6.129	4.079	6.019	3.693	6.164	5.051	6.417	4.852	6.213	6.92	8.7	8.776	7.501	7.212	8.499	11.028	12.05	10.58	10.899	8.003	13.249	8.687
gene11192	ddx51.L	83.617	89.276	72.333	67.29	59.2	59.504	42.402	40.347	31.328	31.036	39.885	38.888	39.052	37.948	37.32	36.155	43.298	36.619	49.91	61.063	43.12	39.955	39.983	35.744	37.863	36.69	39.46	34.91	35.537	31.399	30.659	32.541	30.38	33.435	34.29	46.501	46.227	46.548	40.788	40.206	35.164	66.267	72.749	72.018	67.526	67.415	68.465	68.632
gene11193	nrde2.L	25.098	24.936	21.305	23.123	18.35	14.936	24.328	22.349	12.257	10.051	23.395	23.033	24.987	26.926	26.143	23.758	27.676	25.531	23.874	27.301	18.338	17.815	17.839	16.235	18.422	20.086	22.294	20.558	20.772	21.738	21.128	21.097	23.412	23.909	21.853	24.101	28.697	25.494	24.821	18.423	21.682	22.613	23.407	21.299	23.388	24.696	23.414	23.608
gene11194	wnt11.L	0	0	0.154	0.135	0	0	0.111	0	2.864	2.758	0.063	0.061	0	0	0	0.148	0.312	0.073	0.198	0.237	0	0	0	0	0	0	0	0	0	0.061	0	0.12	0.237	0.313	0	0	0	0	0	0	0.309	0	0.062	0	0	0	0	0
gene11195	cdc42ep2.S	8.624	8.641	10.754	9.076	14.984	15.351	14.886	12.507	7.578	6.975	15.771	14.003	15.663	15.284	9.711	10.66	9.837	12.462	11.165	11.67	11.435	9.57	8.013	9.153	10.19	9.027	8.927	10.582	11.222	8.945	7.459	10.947	11.002	11.204	9.458	11.625	9.858	10.352	16.421	12.28	17.491	16.915	15.066	14.76	14.063	16.206	18.702	18.011
gene11196	cenph.L	36.702	36.74	33.983	36.507	37.967	41.324	35.783	34.67	27.588	27.382	36.142	35.548	38.601	37.285	25.844	26.56	26.371	27.421	29.709	32.785	30.639	33.189	34.92	33.794	31.294	30.026	32.593	34.565	31.787	34.758	34.946	35.862	34.648	35.694	35.612	37.585	32.495	35.689	33.912	37.459	38.645	36.961	35.772	36.265	36.725	34.57	39.525	37.631
gene11197	col4a5.S	0.1	0.157	0.043	0.056	0.058	0.058	0	0	0	0	0.079	0	0	0.024	0	0.021	0	0	0	0.05	0.088	0.122	0.099	0.066	0.022	0.06	0	0	0	0	0.026	0	0	0.078	0	0.048	0	0.05	0	0	0	0.086	0.078	0	0.127	0.123	0	0
gene11198	fam53a.S	79.062	77.669	78.191	81.41	100.211	89.943	62.314	55.455	12.764	11.513	58.468	58.119	66.361	62.471	55.859	61.861	61.818	57.973	60.397	47.452	53.1	47.776	51.209	44.112	47.44	45.94	63.461	67.557	66.993	71.118	67.422	66.863	68.023	73.908	66.529	67.917	76.66	71.76	59.529	55.309	64.473	72.859	65.933	69.674	67.932	70.022	66.237	71.234
gene11199	tdrd15.S	4.306	3.762	2.024	2.745	2.162	2.418	2.483	2.932	0.803	1.415	3.637	3.146	3.611	3.014	3.044	3.166	2.558	2.652	2.783	1.91	1.172	1.461	1.131	1.448	1.716	1.225	3.348	2.752	3.45	3.002	2.973	3.91	3.767	3.169	2.504	3.14	3.323	3.206	2.477	3.065	3.022	0.337	0.506	0.275	0.28	0.264	0.361	0.551
gene112	spx1.S	0	0.88	0.674	1.419	0	1.453	0.438	0.637	0	0.469	1	0.32	0.449	0.153	0.291	0.261	0.205	0.193	0.521	0.156	2.402	2.504	1.044	2.078	1.544	1.507	1.428	1.762	1.341	1.939	1.139	1.105	0.468	1.156	0.571	0.606	1.666	1.265	0.821	1.042	0.407	0.545	0.98	0.988	0.201	0.465	0.359	0
gene1120	eif3a.L	102.249	102.277	120.637	98.476	116.194	104.07	100.486	97.135	143.818	150.12	109.273	97.793	112.794	119.342	127.402	134.603	160.721	131.979	125.851	163.519	74.839	63.363	67.602	62.039	58.81	71.832	87.973	82.62	81.119	81.275	81.677	85.028	95.384	105.083	86.83	112.781	111.243	94.028	112.068	89.625	115.698	139.291	151.417	159.849	151.784	147.31	155.094	159.914
gene11200	rnf4.S	40.79	35.894	40.338	50.156	21.658	31.286	22.079	23.092	4.703	4.25	25.23	20.894	19.926	26.129	16.905	20.194	17.402	22.691	30.942	19.687	37.514	30.551	34.249	34.289	33.967	33.306	22.014	23.234	25.071	22.27	25.083	19.322	19.658	19.311	21.738	31.981	27.849	34.116	21.014	28.907	21.572	34.737	30.055	29.2	26.617	30.38	28.975	29.897
gene11201	<NA>	56.821	56.178	75.857	77.911	52.501	74.517	69.705	69.678	11.094	11.663	68.651	68.805	72.985	83.241	58.388	53.794	44.512	64.326	60.855	48.283	58.468	59.775	64.295	59.795	70.302	58.609	67.76	62.733	64.79	64.99	64.459	63.273	52.489	55.393	59.715	59.963	54.123	74.182	61.938	76.401	62.647	56.614	57.051	48.159	55.545	56.297	54.277	55.308
gene11202	snph.S	38.846	41.173	51.462	45.494	45.164	31.489	41.306	39.277	36.237	37.883	38.257	41.063	42.54	43.471	42.974	45.911	53.716	49.091	45.957	56.85	46.457	43.597	43.344	37.217	41.483	42.355	51.445	46.385	41.829	41.001	51.163	46.069	49.88	56.313	50.214	53.459	59.466	51.913	47.027	43.873	43.267	61.351	58.286	59.167	63.98	59.607	62.773	56.522
gene11203	mex3d.S	36.602	37.019	19.451	19.085	29.731	33.043	29.392	26.447	9.864	10.335	28.755	26.033	31.978	29.727	37.732	33.851	34.089	40.191	41.656	40.03	31.106	30.921	31.341	29.907	29.012	29.729	27.735	28.556	26.185	30.326	26.841	30.585	32.144	31.589	31.317	33.746	36.172	31.867	25.995	23.66	27.89	36.126	33.963	34.405	34.873	34.796	35.97	35.649
gene11204	cyb5r4.L	0	0	0.058	0.306	0	0.157	0.567	0.137	0	0	0.288	0.207	0.194	0.199	0	0	0	0.042	0	0	0.159	0.166	0	0.179	0.121	0.081	0.176	0.069	0.145	0	0.07	0.068	0.202	0	0	0	0	0.068	0.177	0.27	0.263	0.157	0	0	0.434	0.067	0	0
gene11205	ptprd.S	0.752	0.818	0.632	1.121	1.386	1.925	0.089	0.13	1.923	2.652	0.068	0.065	0.137	0.094	0.371	0.226	0.46	0.422	0.93	1.051	2.523	2.552	3.213	3.008	2.646	2.727	0.062	0.098	0.12	0.033	0.083	0.113	0.064	0.017	0.019	0.123	0.132	0.032	0.063	0.106	0.145	2.24	2.197	2.195	2.296	1.993	2.782	2.311
gene11206	spin1.L	43.98	41.889	38.017	41.367	37.135	43.717	33.154	34.191	12.723	13.515	33.94	34.924	34.051	37.427	30.788	31.818	30.138	33.457	39.504	36.901	39.724	44.058	45.601	40.511	45.411	41.311	31.438	31.075	30.322	29.216	30.414	29.773	29.501	31.053	31.081	36.561	36.196	38.475	31.686	35.14	35.933	35.951	36.889	35.566	38.295	35.146	36.783	36.649
gene11207	pafah1b2.S	62.521	64.415	53.449	58.539	59.495	70.148	50.05	49.866	9.467	10.681	48.217	53.602	48.837	51.1	46.98	45.825	43.865	54.971	58.989	54.513	58.984	65.843	67.509	63.309	68.371	62.257	46.556	50.837	47.693	50.416	46.677	50.659	51.698	52.461	51.12	58.763	61.859	64.341	45.429	43.365	43.939	51.038	46.576	45.525	52.032	51.958	51.324	55.827
gene11208	gpr171.L	0	0	0	0	0	0	0	0.052	0	0	0	0.052	0	0	0	0	0	0	0	0	0.06	0.062	0.068	0.202	0.136	0.183	0.066	0	0	0	0.053	0.051	0	0	0	0	0	0	0	0.135	0	0	0	0	0	0	0	0
gene11209	golm2.S	79.768	79.999	61.376	56.645	68.811	72.623	69.263	64.382	25.274	27.934	67.336	66.59	77.656	82.11	65.903	67.331	70.868	67.783	67.475	76.017	79.725	73.533	73.814	76.279	76.79	70.68	68.205	68.054	64.413	65.757	64.215	57.612	62.758	63.753	57.906	75.216	74.319	68.182	65.383	71.864	79.093	72.928	76.815	82.143	73.597	78.004	77.554	70.955
gene1121	snx7.L	114.192	111.564	91.525	90.4	47.104	51.213	41.051	41.713	20.258	13.574	40.264	44.14	45.069	46.356	59.541	64.739	61.981	65.391	84.408	69.413	103.648	110.239	118.694	107.92	111.04	94.35	58.6	61.206	64.282	66.663	63.891	59.202	63.015	61.06	61.246	68.777	69.835	76.48	40.701	46.099	38.712	90.337	82.405	76.257	80.659	85.647	83.528	86.275
gene11210	efs.S	0.828	0.623	0.197	0.259	0.47	0.265	1.864	2.035	14.039	14.469	1.522	1.988	1.256	1.316	1.596	1.308	1.369	0.967	1.213	1.798	0.371	0.739	0.496	0.493	0.487	0.619	0.522	1.112	0.765	0.945	1.159	1.009	1.111	1.206	1.077	0.581	0.777	0.895	1.499	1.294	1.746	0.597	0.537	1.01	0.477	0.538	0.754	0.684
gene11211	rrp8.S	25.971	25.163	24.013	22.313	22.647	20.306	23.773	24.503	18.33	16.819	26.603	25.466	27.64	26.387	21.552	20.049	28.13	22.601	25.334	37.938	27.857	33.594	31.963	29.609	29.844	29.096	34.537	32.316	31.548	31.597	33.725	31.277	28.39	30.567	31.368	42.512	40.8	35.435	31.039	28.555	25.645	32.86	31.165	32.263	32.938	30.01	33.005	29.96
gene11212	mib2.L	31.053	33.439	23.744	26.251	30.35	27.395	34.446	35.384	20.128	20.615	37.802	37.898	37.399	39.505	40.729	36.728	41.832	40.035	41.112	42.496	34.957	37.092	36.964	33.247	34.652	35.352	28.909	28.589	31.716	29.456	27.852	26.513	29.551	30.689	29.233	29.885	34.614	31.84	33.674	33.009	32.577	35.664	34.836	37.786	34.252	33.804	33.764	33.071
gene11213	rgs18.S	0.169	0.353	4.541	4.55	0	0	0.234	0	0	0	0	0	0	0	0	0	0	0	0.209	0	0	0	0	0	0	0	0	0	0	0	0	0	0.25	0	0	0	0	0	0	0	0.326	0.291	0	0	0	0	0	0
gene11214	<NA>	0.049	0	0	0	0	0	0	0	0.111	0.22	0	0	0	0	0	0.061	0	0	0.061	0.073	0	0	0	0	0.066	0.177	0	0	0	0	0	0	0	0.077	0	0	0	0	0	0	0	0	0	0	0	0	0	0.088
gene11215	<NA>	1.643	1.827	2.378	2.719	2.255	2.786	1.715	1.465	0.663	0.719	1.533	1.309	1.567	1.646	0.484	0.266	0.656	0.689	0.966	0.958	1.133	0.788	1.494	1.7	0.682	1.493	0.939	1.474	1.2	0.537	0.832	0.888	0.957	1.224	0.681	1.354	1.514	1.091	1.521	1.918	1.663	1.764	2.087	2.02	1.336	2.379	2.387	1.533
gene11216	<NA>	0	0	0	0	0	0	0	0	0	0	0	0	0	0	0	0	0	0	0	0	0	0	0	0	0	0	0	0	0	0	0	0	0	0	0	0	0	0	0	0	0	0	0	0	0	0	0	0
gene11217	wdtc1.L	27.395	27.741	24.124	24.511	22.434	18.184	22.231	21.851	13.707	12.188	25.349	23.157	23.565	27.48	23.948	23.18	27.848	25.525	25.159	28.81	25.117	22.14	25.885	23.491	24.473	23.122	23.526	22.813	21.543	24.27	23.286	22.893	25.896	23.678	23.785	27.187	29.166	27.218	23.85	22.817	23.12	28.503	29.905	29.1	27.991	28.159	28.821	26.989
gene11218	zfpl1.S	16.034	15.842	11.044	9.766	13.754	10.901	3.965	4.159	4.079	3.062	4.118	4.294	5.015	5.575	6.789	7.634	7.683	5.744	7.313	8.88	7.044	7.75	6.485	5.063	7.679	6.319	5.619	5.938	7.811	6.561	6.436	5.629	6.279	5.48	7.592	7.804	7.775	8.262	5.287	5.445	4.667	6.86	5.939	7.883	6.461	7.394	6.72	5.292
gene11219	pdcd2l.L	23.903	25.962	18.925	21.369	23.709	22.146	15.094	14.107	2.674	2.825	14.412	16.338	13.991	12.607	14.975	14.775	14.99	12.079	20.04	20.267	24.227	26.483	27.669	19.594	28.252	22.972	13.308	13.172	15.089	10.654	9.692	8.953	10.063	8.311	11.197	13.738	17.185	14.683	15.705	14.626	8.65	16.606	17.366	15.829	16.109	17.597	18.075	16.471
gene1122	cdc42se2l.L	1.274	1.202	4.014	3.464	1.111	1.943	1.967	2.036	10.09	10.03	1.512	1.414	2.573	1.676	3.591	2.908	2.936	3.336	4.393	3.633	3.824	3.359	3.738	3.432	2.546	3.023	4.935	6.445	5.379	5.112	4.202	6.022	5.043	6.183	5.665	6.761	6.456	5.553	2.481	1.599	2.081	3.843	3.722	4.366	4.116	4.185	3.383	4.706
gene11220	scel.L	0.191	0.119	0.146	0.257	0.133	0.394	0.053	0	1.365	2.12	0	0	0	0	0.105	0.047	0.149	0.209	0.188	0.283	0.401	0.279	0.906	0.827	0.355	0.341	0.295	0.232	0.364	0.409	0.589	0.514	0.282	0.06	0.275	0.274	0.201	0.343	0	0.075	0.074	0.066	0.177	0.214	0.291	0.224	0.52	0.203
gene11221	apoh.L	0	0	0	0	0	0	0	0	0	0	0	0	0	0	0	0	0.136	0	0	0	0	0	0	0	0	0	0.135	0	0	0	0	0	0	0	0	0	0	0	0	0	0	0	0	0	0	0	0	0
gene11222	ambp.L	0.709	1.202	0.567	0.596	0	0.305	0.49	0.268	0.198	0	0.14	0	0.251	0.387	0.49	0.11	0.086	0.567	0.767	0.657	0	0.162	0	0	0.236	0.317	0.172	0.404	0	0.272	0.41	0.133	0.393	0.833	0.32	0.509	0.778	0.399	0.172	0.175	0.342	0	0.275	0.332	1.352	0.391	0	0.788
gene11223	arhgap10.L	27.011	26.804	29.647	29.54	29.995	30.564	34.07	32.369	23.013	22.153	31.921	32.678	34.26	34.268	29.05	25.28	28.041	28.753	29.082	34.57	24.557	24.465	26.517	24.712	23.416	25.362	24.493	25.201	22.374	23.886	19.628	22.802	22.181	23.479	20.975	23.906	24.497	23.724	30.261	28.698	27.891	28.316	29.496	28.873	28.593	29.195	31.222	27.273
gene11224	bcorl1.L	5.684	5.332	6.186	4.134	5.879	5.135	5.751	5.172	5.789	7.935	5.166	4.624	4.468	4.068	4.715	5.169	5.155	4.118	4.83	5.25	3.94	3.916	3.261	3.994	3.619	4.088	4.251	3.039	4.136	4.89	4.258	3.994	3.521	4.484	4.389	3.905	4.773	4.176	4.172	4.419	4.413	6.305	6.258	7.13	5.411	5.521	5.566	5.762
gene11225	abhd14a.L	2.104	2.546	1.897	1.449	1.334	0.33	0.927	1.228	0.107	0.426	1.361	1.09	1.289	1.392	1.322	0.769	1.072	1.18	1.064	2.056	1.761	1.573	1.232	1.698	1.847	2.309	2.964	2.399	2.358	2.567	1.182	2.15	2.124	1.874	1.814	2.955	3.864	2.727	1.117	1.23	1.015	2.473	1.853	1.704	2.19	2.253	1.793	2.041
gene11226	<NA>	0.192	0.143	0.105	0.184	0.191	0.189	0.038	0.331	0.184	0.548	0.173	0.083	0.078	0.04	0.189	0.102	0.027	0.2	0.102	0.325	0.384	0.3	0.109	0.486	0.547	0.343	0.159	0.25	0.044	0.504	0.127	0.082	0.203	0.386	0.396	0.118	0.048	0.164	0.107	0.163	0.159	0.425	0.255	0.411	0.209	0.202	0.093	0.244
gene11227	htr2a.L	0	0	0	0	0	0	0	0	0	0	0	0	0	0	0	0	0	0	0	0	0	0	0	0	0	0	0	0	0	0	0	0	0	0	0	0.045	0	0	0	0	0	0	0	0	0.12	0	0	0
gene11228	nhlh1.S	0.034	0	0.043	0	0	0	0	0	0	0	0	0	0	0	0	0	0	0	0	0	0	0.062	0	0	0.045	0	0	0.051	0	0	0	0	0	0.106	0	0	0	0.102	0.132	0	0.131	0	0	0	0	0	0	0
gene11229	acap2.S	8.93	8.628	5.276	5.957	7.225	8.528	5.651	6.928	4.455	5.413	5.598	6.171	6.621	6.964	7.118	7.086	5.741	7.864	8.081	8.737	7.44	10.181	9.92	9.559	9.08	9.709	5.647	5.962	4.127	5.09	4.473	5.755	4.972	6.051	4.686	5.751	5.722	5.855	6.499	6.444	6.638	5.754	5.673	6.148	5.143	4.531	5.312	5.472
gene1123	pan2.L	42.713	43.937	57.464	50.298	16.171	15.813	68.57	61.252	13.41	11.41	61.583	62.33	77.861	72.155	38.732	38.595	49.25	44.091	43.172	44.937	19.801	17.712	18.563	18.677	17.505	16.976	17.67	16.757	16.396	15.848	14.627	18.252	18.474	19.748	16.969	17.327	20.746	19.65	63.083	55.359	64.351	32.767	30.08	30.43	31.062	31.77	29.416	30.127
gene11230	psmf1.L	12.925	13.939	15.656	11.02	18.934	11.882	9.54	9.373	10.412	11.308	9.402	7.983	9.903	8.65	12.27	10.439	12.843	12.831	12.889	15.586	13.142	8.346	11.265	9.346	9.409	7.241	12.514	12.181	10.416	8.722	8.917	9.295	7.781	11.072	8.247	12.875	10.29	12.153	11.909	10.054	8.814	17.225	16.025	13.734	15.292	13.701	18.353	13.023
gene11231	gfra4.S	0.061	0.223	0.078	0.205	0.106	0	0.042	0.138	0.068	0	0.096	0.139	0.086	0.044	0.042	0.151	0.089	0.083	0.075	0.181	0.214	0.111	0.241	0.42	0.243	0.218	0	0.324	0.242	0.093	0.282	0.183	0.135	0.095	0.11	0	0.214	0.091	0	0.181	0.176	0.157	0.094	0.286	0.116	0.045	0.156	0.325
gene11232	frmd6.S	3.48	3.57	3.897	2.827	0.889	1.913	1.889	2.516	1.745	1.502	2.752	2.415	2.639	2.401	2.219	2.207	1.71	2.426	2.114	1.401	2.577	2.577	2.704	2.396	2.277	1.931	1.22	1.459	1.694	1.564	1.205	1.596	1.199	1.41	1.355	0.991	1.475	1.306	2.249	1.721	1.969	2.301	2.046	2.475	1.345	2.363	2.352	2.454
gene11233	ptprr.S	0.028	0	0.072	0.094	0	0	0	0	0	0	0	0	0	0	0.194	0.035	0.109	0.153	0.173	0.083	0.049	0.153	0.222	0.331	0.075	0.1	0	0	0	0	0	0.084	0	0	0	0	0	0	0	0	0	0	0	0	0	0	0.048	0
gene11234	spred3.S	8.964	8.713	15.518	15.873	8.276	7.675	4.865	6.107	1.245	1.89	4.633	6.54	6.941	7.543	5.832	5.106	5.878	5.245	4.889	4.777	7.96	8.458	7.601	7.048	7.178	8.17	17.358	17.188	13.884	17.207	19.274	15.58	15.785	17.168	14.231	20.245	18.263	19.384	7.014	6.141	7.01	3.18	4.858	3.735	4.36	4.183	4.393	3.438
gene11235	baz2a.L	127.166	126.463	136.389	120.827	131.355	140.616	134.249	121.935	124.512	129.645	129.772	122.471	147.707	134.648	120.73	128.501	134.514	127.876	133.316	121.248	116.623	105.738	104.308	100.43	89.613	100.902	98.761	103.084	96.687	102.93	95.801	108.058	106.56	112.797	97.335	108.205	123.086	107.422	109.384	88.226	115.261	117.06	107.519	118.67	111.502	112.223	113.299	117.46
[truncated: 48,204 more rows]
[truncated: 12 more columns]

## Sheet: B. Intron RPKM
Geneid	Symbol	s5_1	s5_2	s6_1	s7_1	s8_1	s8_2	s9_a_1	s9_a_2	s10.5_1	s10.5_2	s9_dmso_a_1	s9_dmso_a_2	s9_trip_a_1	s9_trip_a_2	s9_dmso_b_1	s9_dmso_b_2	s9_trip_b_1	s9_trip_b_2	s9_chx_b_1	s9_chx_b_2	s9_gfp_mo_G_1	s9_gfp_mo_G_2	s9_gfp_mo_G_3	s9_pou.3_sox_mo_G_1	s9_pou.3_sox_mo_G_2	s9_pou.3_sox_mo_G_3	s9_gfp_mo_F_1	s9_gfp_mo_F_2	s9_gfp_mo_F_3	s9_pou.2_pou.3_mo_F_1	s9_pou.2_pou.3_mo_F_2	s9_pou.2_pou.3_mo_F_3	s9_pou.2_pou.3_sox_mo_F_1	s9_pou.2_pou.3_sox_mo_F_2	s9_pou.2_pou.3_sox_mo_F_3	s9_chx_pou.2_pou.3_sox_mo_F_1	s9_chx_pou.2_pou.3_sox_mo_F_2	s9_chx_pou.2_pou.3_sox_mo_F_3	s9_e_1	s9_gfp_mo_e_1	s9_pou.3_sox_mo_e_1	s9_chx_gfp_mo_c_1	s9_chx_gfp_mo_c_2	s9_chx_sox_mo_c_1	s9_chx_sox_mo_c_2	s9_chx_pou.3_mo_c_1	s9_chx_pou.3_mo_c_2	s9_chx_pou.3_sox_mo_c_1
[truncated: 39,155 more rows]
[truncated: 12 more columns]

[truncated: 1 more sheets: C. DEseq2 exon, intron (i_)]
