# Supplementary material for: Hybridization led to a rewired pluripotency network in the allotetraploid Xenopus laevis
Source: eLife. 2023 Oct 3;12:e83952. doi: 10.7554/eLife.83952 (PMC10569791; doi:10.7554/eLife.83952)
Supplement: Supplementary file 2. [file elife-83952-supp2.xlsx]

## Sheet: A. All gene activation codes
Geneid	Symbol	Gene	Homeo_status	Maternal	Confident_activated_s8	Confident_firstwave_s9	Confident_activated_s9	Confident_activated_s10.5	PouSox_effect	CHX_PouSox_effect	Activated_dmso_vs_trip_b	Activated_dmso_vs_trip_a	Activated_s8_vs_s5	Activated_s9_vs_s5	Activated_s10.5_vs_s5	Activated_chx_vs_trip_b	Down_ps_G	Up_ps_G	Down_pp_F	Up_pp_F	Down_pps_F	Up_pps_F	Down_chx_ps_c	Up_chx_ps_c	Down_chx_ps_d	Up_chx_ps_d	Down_chx_pps_F	Up_chx_pps_F
gene1	slc26a4.3.L	slc26a4.3	LS	.	.	.	.	.	.	.	.	.	.	.	.	.	.	.	.	.	.	.	.	.	.	.	.	.
gene10	.	.	.	X	.	.	.	.	.	.	.	.	.	.	.	.	.	.	.	.	.	.	.	.	.	.	.	.
gene100	dhx16.S	dhx16	S	X	.	.	.	.	.	.	.	.	.	.	.	.	.	.	.	.	.	.	.	.	.	.	.	.
gene1000	ufm1.L	ufm1	LS	X	.	.	.	X	.	.	.	.	e	.	e	.	.	.	.	.	.	.	.	.	.	.	.	.
gene10000	cyp2c8.1.L	cyp2c8.1	LS	X	X	.	X	.	.	.	i	i	e	ei	.	.	.	.	.	.	.	.	.	.	.	.	.	.
gene10001	prdm12.L	prdm12	L	.	.	.	.	X	.	.	.	.	.	.	e	.	.	.	.	.	.	.	.	.	.	.	.	.
gene10002	mmel1.L	mmel1	LS	.	.	.	.	.	.	.	.	.	.	.	.	.	.	.	.	.	.	.	.	.	.	.	.	.
gene10003	clptm1l.S	clptm1l	S	X	.	.	.	.	.	.	.	.	.	.	.	.	.	.	.	.	.	.	.	.	.	.	.	.
gene10004	rftn1.L	rftn1	L	X	.	.	.	.	.	.	.	.	.	.	.	.	.	.	.	.	.	.	.	.	.	.	.	.
gene10005	.	.	.	.	.	.	.	.	.	.	.	.	.	.	.	.	.	.	.	.	.	.	.	.	.	.	.	.
gene10006	supt16h.L	supt16h	LS	X	.	.	.	.	.	.	.	.	.	.	.	.	.	.	.	.	.	.	.	.	.	.	.	.
gene10007	gpr143.S	gpr143	LS	.	.	.	.	X	.	.	.	.	.	e	e	.	.	.	.	.	.	.	.	.	.	.	.	.
gene10008	naa60.L	naa60	L	X	.	.	.	.	.	.	.	.	.	.	.	.	.	.	.	.	.	.	.	.	.	.	.	.
gene10009	.	.	.	X	.	.	.	.	.	.	.	.	.	.	.	.	.	.	.	.	.	.	.	.	.	.	.	.
gene1001	slc46a3.L	slc46a3	L	X	.	.	.	.	.	.	.	.	.	.	.	.	.	.	.	.	.	.	.	.	.	.	.	.
gene10010	acer3.S	acer3	LS	X	.	.	X	X	U	D	i	i	.	i	i	.	.	.	.	.	.	i	.	.	i	.	.	.
gene10011	.	.	.	X	.	.	.	.	.	.	.	.	.	.	.	.	.	.	.	.	.	.	.	.	.	.	.	.
gene10012	aldh3b2.L	aldh3b2	L	X	.	.	.	.	.	D	.	.	.	.	.	.	.	.	.	.	.	.	.	.	e	.	.	e
gene10013	.	.	.	.	.	.	.	.	.	.	.	.	.	.	.	.	.	.	.	.	.	.	.	.	.	.	.	.
gene10014	.	.	.	.	.	.	.	.	.	.	.	.	.	.	.	.	.	.	.	.	.	.	.	.	.	.	.	.
gene10015	atp5if1.S	atp5if1	LS	X	.	.	.	.	.	U	.	.	.	.	.	.	.	.	.	.	.	.	.	.	.	.	.	e
gene10016	exosc6.L	exosc6	L	X	.	.	.	.	.	.	.	.	.	.	.	.	.	.	.	.	.	.	.	.	.	.	.	.
gene10017	ptpn1.S	ptpn1	LS	X	.	.	.	.	.	.	.	.	.	.	.	.	.	.	.	.	.	.	.	.	.	.	.	.
gene10018	XB22167168.L [provisional]	XB22167168 [provisional]	L	X	.	.	.	.	.	.	.	.	.	.	.	.	.	.	.	.	.	.	.	.	.	.	.	.
gene10019	tgfbrap1.L	tgfbrap1	LS	X	.	.	.	.	.	.	i	.	.	i	.	.	.	.	.	.	.	.	.	.	.	.	.	.
gene1002	tmem145.L	tmem145	LS	X	.	.	.	.	.	.	.	.	.	.	.	.	.	.	.	.	.	.	.	.	.	.	.	.
gene10020	phax.L	phax	LS	X	.	.	X	.	U	.	i	i	.	i	.	.	.	i	.	.	.	.	.	.	.	.	.	.
gene10021	rabgap1l.S	rabgap1l	LS	X	.	X	X	.	.	D	i	i	.	i	.	i	.	.	.	.	.	.	i	.	i	.	.	.
gene10022	arf1.S	arf1	LS	X	.	X	X	X	U	.	i	i	.	i	ei	i	.	.	.	.	.	i	.	.	.	.	.	.
gene10023	scnm1.L	scnm1	L	X	.	.	.	.	.	.	.	.	.	.	.	.	.	.	.	.	.	.	.	.	.	.	.	.
gene10024	rab29.S	rab29	S	X	.	.	.	.	.	.	.	.	.	.	.	.	.	.	.	.	.	.	.	.	.	.	.	.
gene10025	pik3r2.L	pik3r2	LS	X	.	.	.	.	.	D	.	.	.	.	.	.	.	.	.	.	.	.	.	.	.	.	e	.
gene10026	rab38.L	rab38	LS	.	.	.	.	.	.	.	.	.	.	.	.	.	.	.	.	.	.	.	.	.	.	.	.	.
gene10027	dnajc10.L	dnajc10	LS	X	.	.	.	.	.	.	.	.	.	.	.	.	.	.	.	.	.	.	.	.	.	.	.	.
gene10028	ppm1g.L	ppm1g	LS	X	.	.	X	X	U	.	i	i	.	i	e	.	.	.	.	.	.	i	.	.	.	.	.	.
gene10029	nxpe3.S	nxpe3	LS	X	.	.	.	.	.	U	.	.	.	.	.	.	.	.	.	.	.	.	.	.	.	.	.	e
gene1003	ereg.S	ereg	LS	.	.	.	.	.	.	.	.	.	.	.	.	.	.	.	.	.	.	.	.	.	.	.	.	.
gene10030	alx1.L	alx1	LS	.	.	.	.	.	.	.	.	.	.	e	.	.	.	.	.	.	.	.	.	.	.	.	.	.
gene10031	papss1.S	papss1	LS	X	.	.	.	.	.	.	.	.	.	.	.	.	.	.	.	.	.	.	.	.	.	.	.	.
gene10032	MGC130869.L	MGC130869	L	.	.	.	.	.	.	.	.	.	.	.	.	.	.	.	.	.	.	.	.	.	.	.	.	.
gene10033	angpt4.L	angpt4	LS	.	.	.	.	X	.	.	.	.	e	.	e	.	.	.	.	.	.	.	.	.	.	.	.	.
gene10034	ocel1.L	ocel1	L	.	.	.	.	.	.	.	.	.	.	.	.	.	.	.	.	.	.	.	.	.	.	.	.	.
gene10035	aloxe3.L	aloxe3	L	.	.	.	.	.	.	.	.	.	.	.	.	.	.	.	.	.	.	.	.	.	.	.	.	.
gene10036	frat1.S	frat1	S	X	.	.	.	.	.	.	.	.	.	.	.	.	.	.	.	.	.	.	.	.	.	.	.	.
gene10037	glrx3.L	glrx3	LS	X	.	.	.	.	.	.	.	.	.	.	.	.	.	.	.	.	.	.	.	.	.	.	.	.
gene10038	tmem131.S	tmem131	LS	X	.	.	.	.	U	.	.	.	.	.	.	.	.	.	.	.	.	.	.	.	.	.	.	.
gene10039	XB22063306.L [provisional:btn1a1]	XB22063306 [provisional:btn1a1]	L	.	.	.	.	.	.	.	.	.	.	.	.	.	.	.	.	.	.	.	.	.	.	.	.	.
gene1004	cyp2a6.1.S	cyp2a6.1	LS	.	.	.	.	.	.	.	.	.	.	.	.	.	.	.	.	.	.	.	.	.	.	.	.	.
gene10040	rbm12b.3.L	rbm12b.3	LS	X	X	.	X	X	U	.	i	i	i	i	ei	.	.	i	.	.	.	.	.	.	.	.	.	.
gene10041	psat1.L	psat1	LS	X	.	.	.	.	.	D	.	.	.	.	.	.	.	.	.	.	.	.	i	.	.	.	.	.
gene10042	trmt61b.L	trmt61b	L	X	.	.	.	.	.	.	.	.	.	.	.	.	.	.	.	.	.	.	.	.	.	.	.	.
gene10043	cdkl1.S	cdkl1	LS	.	.	.	.	.	.	.	.	.	.	.	.	.	.	.	.	.	.	.	.	.	.	.	.	.
gene10044	usp15.L	usp15	LS	X	.	.	.	.	.	.	.	.	.	.	.	.	.	.	.	.	.	.	.	.	.	.	.	.
gene10045	atp6ap1.2.S	atp6ap1.2	LS	X	.	.	.	X	.	.	.	.	.	.	e	.	.	.	.	.	.	.	.	.	.	.	.	.
gene10046	rbm45.S	rbm45	LS	X	.	.	X	X	U	.	i	i	.	i	ei	.	.	i	.	.	.	.	.	.	.	.	.	.
gene10047	npy.S	npy	LS	.	.	.	.	.	.	.	.	.	.	.	.	.	.	.	.	.	.	.	.	.	.	.	.	.
gene10048	stk36.L	stk36	L	X	.	.	.	.	.	.	.	.	.	.	.	.	.	.	.	.	.	.	.	.	.	.	.	.
gene10049	efemp2.L	efemp2	L	.	.	.	X	.	U	.	i	i	.	ei	.	.	.	ei	.	.	.	ei	.	.	.	.	.	.
gene1005	habp2.L	habp2	L	.	.	.	.	.	.	.	.	.	.	.	.	.	.	.	.	.	.	.	.	.	.	.	.	.
gene10050	flt1.S	flt1	LS	.	.	.	.	X	D	.	.	.	.	.	e	.	.	.	.	.	e	.	.	.	.	.	.	.
gene10051	.	.	.	.	.	.	.	.	.	.	.	.	.	.	.	.	.	.	.	.	.	.	.	.	.	.	.	.
gene10052	znf385b.S	znf385b	LS	.	.	.	.	.	.	.	.	.	.	.	.	.	.	.	.	.	.	.	.	.	.	.	.	.
gene10053	tspan6.L	tspan6	LS	X	.	.	X	.	.	.	i	i	.	i	.	.	.	.	.	.	.	.	.	.	.	.	.	.
gene10054	ttc5.L	ttc5	LS	X	.	.	.	.	.	.	i	.	.	.	.	.	.	.	.	.	.	.	.	.	.	.	.	.
gene10055	dusp8.S	dusp8	LS	X	X	.	X	X	.	D	i	i	e	i	i	.	.	.	.	.	.	.	.	.	.	.	e	.
gene10056	parn.L	parn	LS	X	.	.	.	.	.	.	.	.	.	.	.	.	.	.	.	.	.	.	.	.	.	.	.	.
gene10057	cuedc1.L	cuedc1	LS	X	.	.	.	.	.	.	.	.	.	.	.	.	.	.	.	.	.	.	.	.	.	.	.	.
gene10058	XB5864179.L [provisional:cyp4b1]	XB5864179 [provisional:cyp4b1]	L	X	.	.	.	.	.	D	.	.	.	.	.	.	.	.	.	.	.	.	.	.	.	.	e	.
gene10059	.	.	.	.	.	.	.	.	.	.	.	.	.	.	.	.	.	.	.	.	.	.	.	.	.	.	.	.
gene1006	tnni1.2.L	tnni1.2	L	.	.	.	.	.	.	.	.	.	.	.	.	.	.	.	.	.	.	.	.	.	.	.	.	.
gene10060	cplane2.L	cplane2	L	.	.	.	.	.	.	.	.	.	.	.	.	.	.	.	.	.	.	.	.	.	.	.	.	.
gene10061	hif1an.S	hif1an	LS	X	.	.	.	.	.	.	.	.	.	.	.	.	.	.	.	.	.	.	.	.	.	.	.	.
gene10062	ntm.S	ntm	LS	.	.	.	.	.	.	.	.	.	.	.	.	.	.	.	.	.	.	.	.	.	.	.	.	.
gene10063	uts2r.S	uts2r	LS	.	.	.	.	.	.	.	.	.	.	.	.	.	.	.	.	.	.	.	.	.	.	.	.	.
gene10064	btg5.1.S	btg5.1	LS	X	.	.	.	.	.	U	.	.	e	.	.	.	.	.	.	.	.	.	.	.	.	.	.	e
gene10065	pacs1.L	pacs1	L	X	.	.	.	.	.	.	.	.	.	.	.	.	.	.	.	.	.	.	.	.	.	.	.	.
gene10066	casd1.S	casd1	LS	X	.	.	.	.	.	.	.	.	.	.	.	.	.	.	.	.	.	.	.	.	.	.	.	.
gene10067	.	.	.	.	.	.	.	.	.	.	.	.	.	.	.	.	.	.	.	.	.	.	.	.	.	.	.	.
gene10068	med13l.S	med13l	LS	X	.	.	.	.	.	.	.	.	.	.	.	.	.	.	.	.	.	.	.	.	.	.	.	.
gene10069	maco1.S	maco1	LS	X	.	.	.	.	.	.	.	.	.	.	.	.	.	.	.	.	.	.	.	.	.	.	.	.
gene1007	spata18b.S	spata18b	S	X	.	.	.	.	.	.	.	.	.	.	.	.	.	.	.	.	.	.	.	.	.	.	.	.
gene10070	hoxc12.L	hoxc12	LS	.	.	.	.	.	.	.	.	.	.	.	.	.	.	.	.	.	.	.	.	.	.	.	.	.
gene10071	dlx4.L	dlx4	LS	.	.	.	.	.	.	.	.	.	.	.	.	.	.	.	.	.	.	.	.	.	.	.	.	.
gene10072	vac14.L	vac14	L	X	.	.	.	.	.	.	.	.	.	.	.	.	.	.	.	.	.	.	.	.	.	.	.	.
gene10073	rhog2.L	rhog2	LS	X	.	.	X	.	.	D	i	i	.	i	.	.	.	.	.	.	.	.	.	.	i	.	.	.
gene10074	coq8a.S	coq8a	LS	X	.	.	.	.	.	.	.	.	.	.	.	.	.	.	.	.	.	.	.	.	.	.	.	.
gene10075	eif2b1.L	eif2b1	LS	X	.	.	.	.	.	.	.	.	.	.	.	.	.	.	.	.	.	.	.	.	.	.	.	.
gene10076	ptn.L	ptn	LS	.	.	.	.	.	.	.	.	.	.	.	.	.	.	.	.	.	.	.	.	.	.	.	.	.
gene10077	osbpl2.S	osbpl2	LS	X	.	.	.	X	.	.	.	.	.	.	e	.	.	.	.	.	.	.	.	.	.	.	.	.
gene10078	.	.	.	X	.	.	.	.	.	.	.	.	.	.	.	.	.	.	.	.	.	.	.	.	.	.	.	.
gene10079	ppp1r14a.L	ppp1r14a	LS	X	.	X	X	.	D	.	i	i	.	i	.	i	.	.	.	.	e	i	.	.	.	.	.	.
gene1008	spint1.L	spint1	L	X	.	.	X	X	U	.	i	i	.	i	i	.	.	i	.	i	.	i	.	.	.	.	.	.
gene10080	hgfac.L	hgfac	LS	.	.	.	.	.	.	.	.	.	.	.	.	.	.	.	.	.	.	.	.	.	.	.	.	.
gene10081	.	.	.	.	.	.	.	.	.	.	.	.	.	.	.	.	.	.	.	.	.	.	.	.	.	.	.	.
gene10082	sun1.L	sun1	LS	X	.	.	.	.	.	.	.	.	.	.	.	.	.	.	.	.	.	.	.	.	.	.	.	.
gene10083	dhcr24.L	dhcr24	LS	X	.	.	.	.	.	.	.	.	.	.	.	.	.	.	.	.	.	.	.	.	.	.	.	.
gene10084	.	.	.	.	.	.	.	.	.	.	.	.	.	.	.	.	.	.	.	.	.	.	.	.	.	.	.	.
gene10085	shq1.L	shq1	L	X	.	.	.	.	.	.	.	.	.	.	.	.	.	.	.	.	.	.	.	.	.	.	.	.
gene10086	.	.	.	X	.	.	.	.	.	.	.	.	.	.	.	.	.	.	.	.	.	.	.	.	.	.	.	.
gene10087	.	.	.	.	.	.	.	.	.	.	.	.	.	.	.	.	.	.	.	.	.	.	.	.	.	.	.	.
gene10088	frmd8.L	frmd8	L	X	.	.	.	X	.	.	.	.	.	.	e	.	.	.	.	.	.	.	.	.	.	.	.	.
gene10089	chaf1a.S	chaf1a	LS	X	X	.	X	X	U	.	i	i	i	i	i	.	.	.	.	i	.	.	.	.	.	.	.	.
gene1009	bri3.S	bri3	LS	X	.	.	.	.	.	.	.	.	.	.	.	.	.	.	.	.	.	.	.	.	.	.	.	.
gene10090	taf5l.S	taf5l	LS	X	.	.	.	.	.	.	.	.	.	i	.	.	.	.	.	.	.	.	.	.	.	.	.	.
gene10091	myrip.S	myrip	LS	.	.	.	.	.	.	.	.	.	.	.	.	.	.	.	.	.	.	.	.	.	.	.	.	.
gene10092	zswim3.L	zswim3	LS	X	.	.	X	X	D	.	i	i	.	i	i	.	.	.	e	.	e	.	.	.	.	.	.	.
gene10093	abcf1.L	abcf1	L	X	.	.	.	.	.	.	.	.	.	.	.	.	.	.	.	.	.	.	.	.	.	.	.	.
gene10094	mybl2.L	mybl2	LS	X	X	X	X	X	U	D	i	i	ei	i	i	i	.	.	.	.	.	i	.	.	i	.	.	.
gene10095	.	.	.	.	.	.	.	.	.	.	.	.	.	.	.	.	.	.	.	.	.	.	.	.	.	.	.	.
gene10096	krt17.L	krt17	LS	.	.	.	.	.	.	.	.	.	.	.	.	.	.	.	.	.	.	.	.	.	.	.	.	.
gene10097	nptx1.L	nptx1	L	.	.	.	.	.	.	.	.	.	.	.	.	.	.	.	.	.	.	.	.	.	.	.	.	.
gene10098	trappc3l.L	trappc3l	LS	.	.	.	.	.	.	.	.	.	.	.	.	.	.	.	.	.	.	.	.	.	.	.	.	.
gene10099	.	.	.	.	.	.	.	.	.	.	.	.	.	.	.	.	.	.	.	.	.	.	.	.	.	.	.	.
gene101	fzd3.S	fzd3	LS	X	X	X	X	X	U	.	i	i	i	i	ei	i	.	.	.	ei	.	ei	.	.	.	.	.	.
gene1010	.	.	.	X	.	.	.	X	.	.	.	.	.	.	e	.	.	.	.	.	.	.	.	.	.	.	.	.
gene10100	strada.L	strada	LS	X	.	.	.	.	.	.	.	.	.	.	.	.	.	.	.	.	.	.	.	.	.	.	.	.
gene10101	wnt5b.L	wnt5b	LS	.	X	X	X	X	U	D	i	ei	i	i	ei	i	.	i	.	.	.	.	.	.	i	.	i	.
gene10102	rnf10.S	rnf10	LS	X	.	.	X	X	.	.	i	i	.	i	ei	.	.	.	.	.	.	.	.	.	.	.	.	.
gene10103	hmgb3.L	hmgb3	LS	X	X	X	X	X	D	D	i	i	i	i	e	i	i	.	i	.	i	.	i	.	i	.	i	.
gene10104	pdgfra.L	pdgfra	LS	X	.	X	X	X	U	D	ei	ei	.	ei	ei	i	.	i	.	.	.	i	.	.	i	.	i	.
gene10105	mab21l3.S	mab21l3	S	.	.	.	.	X	U	.	.	ei	.	ei	ei	.	.	ei	.	ei	.	ei	.	.	.	.	.	.
gene10106	mfsd5.S	mfsd5	S	X	.	.	.	.	.	.	.	.	.	.	.	.	.	.	.	.	.	.	.	.	.	.	.	.
gene10107	atp5f1c.S	atp5f1c	LS	X	.	.	.	.	.	.	.	.	.	.	.	.	.	.	.	.	.	.	.	.	.	.	.	.
gene10108	fank1.L	fank1	L	X	.	.	.	.	.	.	.	.	.	.	.	.	.	.	.	.	.	.	.	.	.	.	.	.
gene10109	med8.S	med8	LS	X	.	.	.	.	.	.	.	.	.	.	.	.	.	.	.	.	.	.	.	.	.	.	.	.
gene1011	cavin2.L	cavin2	LS	.	.	.	.	.	.	.	.	.	.	.	.	.	.	.	.	.	.	.	.	.	.	.	.	.
gene10110	ndufa8.S	ndufa8	LS	X	.	.	.	.	.	.	.	.	.	.	.	.	.	.	.	.	.	.	.	.	.	.	.	.
gene10111	rab11a.L	rab11a	LS	X	X	.	X	.	.	.	i	i	i	i	.	.	.	.	.	.	.	.	.	.	.	.	.	.
gene10112	polr1a.L	polr1a	L	X	.	.	.	X	.	.	.	.	.	.	e	.	.	.	.	.	.	.	.	.	.	.	.	.
gene10113	thdl17.L	thdl17	L	.	.	.	.	.	.	.	.	.	.	.	.	.	.	.	.	.	.	.	.	.	.	.	.	.
gene10114	secisbp2.L	secisbp2	L	X	.	.	.	X	.	.	.	.	.	.	e	.	.	.	.	.	.	.	.	.	.	.	.	.
gene10115	.	.	.	X	.	.	.	.	.	.	.	.	.	.	.	.	.	.	.	.	.	.	.	.	.	.	.	.
gene10116	cyp2r1.S	cyp2r1	LS	X	.	.	X	X	.	.	ei	i	.	i	e	.	.	.	.	.	.	.	.	.	.	.	.	.
gene10117	.	.	.	X	.	.	.	.	.	.	.	.	.	.	.	.	.	.	.	.	.	.	.	.	.	.	.	.
gene10118	.	.	.	X	.	.	.	X	.	.	.	.	.	.	e	.	.	.	.	.	.	.	.	.	.	.	.	.
gene10119	cfap45.L	cfap45	LS	X	.	.	.	X	.	.	.	.	.	.	e	.	.	.	.	.	.	.	.	.	.	.	.	.
gene1012	rttn.S	rttn	S	X	.	.	.	.	.	.	.	.	.	.	.	.	.	.	.	.	.	.	.	.	.	.	.	.
gene10120	esrrgr.L	esrrgr	L	.	.	.	.	.	.	.	.	.	.	.	.	.	.	.	.	.	.	.	.	.	.	.	.	.
gene10121	.	.	.	X	.	.	.	X	.	U	.	.	i	.	e	.	.	.	.	.	.	.	.	.	.	.	.	i
gene10122	rbsn.L	rbsn	LS	X	.	.	.	.	.	.	.	.	.	.	.	.	.	.	.	.	.	.	.	.	.	.	.	.
gene10123	.	.	.	X	.	.	.	.	.	.	.	.	e	.	.	.	.	.	.	.	.	.	.	.	.	.	.	.
gene10124	.	.	.	.	.	.	.	.	.	.	.	.	.	.	.	.	.	.	.	.	.	.	.	.	.	.	.	.
gene10125	pmm2.S	pmm2	LS	X	.	.	.	.	.	U	.	.	.	.	.	.	.	.	.	.	.	.	.	.	.	.	.	e
gene10126	nktr.S	nktr	LS	X	X	.	X	X	.	.	i	i	i	i	i	.	.	.	.	.	.	.	.	.	.	.	.	.
gene10127	.	.	.	.	.	.	.	.	.	.	.	.	.	.	.	.	.	.	.	.	.	.	.	.	.	.	.	.
gene10128	pip4k2a.S	pip4k2a	LS	X	.	.	.	.	.	.	.	.	.	.	.	.	.	.	.	.	.	.	.	.	.	.	.	.
gene10129	meis3.L	meis3	LS	.	.	.	.	X	D	.	.	.	.	e	e	.	.	.	.	.	e	.	.	.	.	.	.	.
gene1013	pagr1.L	pagr1	LS	X	.	.	.	.	.	.	.	.	.	.	.	.	.	.	.	.	.	.	.	.	.	.	.	.
gene10130	.	.	.	.	.	.	.	X	.	.	.	.	.	.	e	.	.	.	.	.	.	.	.	.	.	.	.	.
gene10131	cenpj.L	cenpj	L	X	.	.	.	.	.	.	.	.	.	.	.	.	.	.	.	.	.	.	.	.	.	.	.	.
gene10132	eif3g.S	eif3g	LS	X	.	.	X	.	.	.	i	i	.	i	.	.	.	.	.	.	.	.	.	.	.	.	.	.
gene10133	upk1a.L	upk1a	LS	X	.	.	.	X	U	.	.	.	.	i	ei	.	.	i	.	i	.	i	.	.	.	.	.	.
gene10134	msh2.L	msh2	L	X	.	.	.	.	.	.	.	.	.	.	.	.	.	.	.	.	.	.	.	.	.	.	.	.
gene10135	pkig.L	pkig	LS	X	.	.	.	.	D	.	.	.	.	.	.	.	.	.	.	.	e	.	.	.	.	.	.	.
gene10136	nit1.S	nit1	S	X	.	.	.	.	.	.	.	.	.	.	.	.	.	.	.	.	.	.	.	.	.	.	.	.
gene10137	cck.L	cck	LS	.	.	.	.	.	.	.	.	.	.	.	.	.	.	.	.	.	.	.	.	.	.	.	.	.
gene10138	pla2g1b.L	pla2g1b	LS	.	.	.	.	.	.	.	.	.	.	.	.	.	.	.	.	.	.	.	.	.	.	.	.	.
gene10139	myh6.L	myh6	LS	.	.	.	.	.	.	.	.	.	.	.	.	.	.	.	.	.	.	.	.	.	.	.	.	.
gene1014	cacna1s.S	cacna1s	S	X	.	.	.	.	.	D	.	.	.	.	.	.	.	.	.	.	.	.	.	.	.	.	e	.
gene10140	gstm1.S	gstm1	S	X	.	.	.	.	.	.	.	.	.	.	.	.	.	.	.	.	.	.	.	.	.	.	.	.
gene10141	rasa4.S	rasa4	LS	.	.	.	.	.	.	.	.	.	.	.	.	.	.	.	.	.	.	.	.	.	.	.	.	.
gene10142	serbp1.S	serbp1	LS	X	.	.	X	X	.	U	i	i	.	i	ei	.	.	.	.	.	.	.	.	.	.	.	.	e
gene10143	.	.	.	.	.	.	.	X	.	.	.	.	e	.	e	.	.	.	.	.	.	.	.	.	.	.	.	.
gene10144	trim14.S	trim14	S	X	.	.	.	.	.	U	.	.	.	.	.	.	.	.	.	.	.	.	.	.	.	.	.	e
gene10145	.	.	.	X	.	.	.	.	.	U	.	.	.	.	.	.	.	.	.	.	.	.	.	.	.	.	.	e
gene10146	mtfr1l.L	mtfr1l	LS	X	.	.	.	.	.	.	.	.	.	.	.	.	.	.	.	.	.	.	.	.	.	.	.	.
gene10147	scml2.S	scml2	LS	X	.	.	.	X	.	.	.	.	.	.	e	.	.	.	.	.	.	.	.	.	.	.	.	.
gene10148	.	.	.	X	.	.	.	.	.	.	.	.	.	.	.	.	.	.	.	.	.	.	.	.	.	.	.	.
gene10149	nsun4.S	nsun4	LS	X	.	.	.	.	.	.	.	.	.	.	.	.	.	.	.	.	.	.	.	.	.	.	.	.
gene1015	.	.	.	X	.	.	.	.	.	U	.	.	.	.	.	.	.	.	.	.	.	.	.	.	.	.	.	e
gene10150	.	.	.	.	.	.	.	.	.	.	.	.	e	e	.	.	.	.	.	.	.	.	.	.	.	.	.	.
gene10151	irf1.L	irf1	LS	.	.	.	.	.	.	.	.	.	.	.	.	.	.	.	.	.	.	.	.	.	.	.	.	.
gene10152	sox3.L	sox3	LS	X	.	.	.	X	.	.	.	.	.	.	e	.	.	.	.	.	.	.	.	.	.	.	.	.
gene10153	XB5909790.S [provisional]	XB5909790 [provisional]	S	X	.	X	X	X	U	D	i	i	.	i	ei	i	.	i	.	i	.	.	.	.	i	.	.	.
gene10154	fbxl7.L	fbxl7	LS	.	.	.	.	.	.	.	.	.	.	.	.	.	.	.	.	.	.	.	.	.	.	.	.	.
gene10155	fntb.S	fntb	LS	X	.	.	.	.	.	.	.	.	.	.	.	.	.	.	.	.	.	.	.	.	.	.	.	.
gene10156	marveld2.L	marveld2	LS	X	.	X	X	X	U	.	i	i	.	i	i	i	.	i	.	.	.	.	.	.	.	.	.	.
gene10157	tesk2.S	tesk2	LS	X	X	X	X	.	.	.	i	i	i	i	.	i	.	.	.	.	.	.	.	.	.	.	.	.
gene10158	serpine1.L	serpine1	LS	.	.	.	.	.	.	.	.	.	.	.	.	.	.	.	.	.	.	.	.	.	.	.	.	.
gene10159	.	.	.	X	.	.	.	X	.	.	e	e	.	.	e	.	.	.	.	.	.	.	.	.	.	.	.	.
gene1016	pik3c2a.L	pik3c2a	LS	X	.	.	.	X	.	.	.	.	.	.	e	.	.	.	.	.	.	.	.	.	.	.	.	.
gene10160	lamtor2.S	lamtor2	LS	X	.	.	.	.	.	.	.	.	.	.	.	.	.	.	.	.	.	.	.	.	.	.	.	.
gene10161	rela.L	rela	LS	X	.	X	X	X	U	D	i	i	.	i	i	i	.	i	.	.	.	.	.	.	i	.	.	.
gene10162	hat1.L	hat1	LS	X	X	X	X	X	.	.	i	i	i	i	i	i	.	.	.	.	.	.	.	.	.	.	.	.
gene10163	marchf4.L	marchf4	LS	.	.	.	.	.	.	.	.	.	.	.	.	.	.	.	.	.	.	.	.	.	.	.	.	.
gene10164	sbk1l2.L	sbk1l2	LS	.	.	.	.	.	.	.	.	.	.	.	.	.	.	.	.	.	.	.	.	.	.	.	.	.
gene10165	masp1.S	masp1	S	.	.	.	.	.	.	.	.	.	.	.	.	.	.	.	.	.	.	.	.	.	.	.	.	.
gene10166	uxs1.S	uxs1	LS	X	.	.	.	.	.	.	.	.	.	.	.	.	.	.	.	.	.	.	.	.	.	.	.	.
gene10167	.	.	.	X	.	.	.	X	.	.	.	.	.	.	e	.	.	.	.	.	.	.	.	.	.	.	.	.
gene10168	cyp2e1.L	cyp2e1	L	X	.	.	.	X	.	D	.	.	e	.	e	.	.	.	.	.	.	.	.	.	.	.	e	.
gene10169	fam162a.L	fam162a	L	X	.	.	.	.	.	.	.	.	.	.	.	.	.	.	.	.	.	.	.	.	.	.	.	.
gene1017	mybbp1a.L	mybbp1a	L	X	X	.	X	.	U	.	i	i	i	i	.	.	.	i	.	.	.	.	.	.	.	.	.	.
gene10170	hp1bp3.L	hp1bp3	LS	X	.	.	.	X	.	.	i	.	i	i	ei	.	.	.	.	.	.	.	.	.	.	.	.	.
gene10171	fut6.2.L	fut6.2	L	.	.	.	.	X	.	.	.	.	.	.	e	.	.	.	.	.	.	.	.	.	.	.	.	.
gene10172	cdc14a.L	cdc14a	LS	X	.	.	.	X	.	.	.	.	.	.	e	.	.	.	.	.	.	.	.	.	.	.	.	.
gene10173	slc7a7.S	slc7a7	LS	.	.	.	.	X	.	.	.	.	.	.	e	.	.	.	.	.	.	.	.	.	.	.	.	.
gene10174	.	.	.	.	X	X	X	.	D	D	ei	ei	e	ei	.	ei	.	.	.	.	e	.	e	.	ei	.	ei	.
gene10175	disp1.L	disp1	LS	X	.	.	.	.	.	.	.	.	.	.	.	.	.	.	.	.	.	.	.	.	.	.	.	.
gene10176	aifm3.L	aifm3	LS	X	.	.	.	.	.	D	.	.	.	.	.	.	.	.	.	.	.	.	.	.	.	.	e	.
gene10177	macc1.S	macc1	LS	X	.	.	.	.	.	.	.	.	e	.	.	.	.	.	.	.	.	.	.	.	.	.	.	.
gene10178	araf.S	araf	LS	X	.	.	.	.	.	.	.	.	.	.	.	.	.	.	.	.	.	.	.	.	.	.	.	.
gene10179	c1qtnf4.L	c1qtnf4	LS	.	.	.	.	.	.	.	.	.	.	.	.	.	.	.	.	.	.	.	.	.	.	.	.	.
gene1018	.	.	.	.	.	.	.	X	.	U	.	.	e	.	e	.	.	.	.	.	.	.	.	.	.	.	.	e
gene10180	trim23.S	trim23	LS	X	.	.	.	.	.	.	.	.	.	.	.	.	.	.	.	.	.	.	.	.	.	.	.	.
gene10181	ccpg1.L	ccpg1	LS	X	.	.	.	.	.	.	.	.	.	.	.	.	.	.	.	.	.	.	.	.	.	.	.	.
gene10182	rnpep.S	rnpep	LS	.	.	.	.	.	.	.	.	.	.	.	.	.	.	.	.	.	.	.	.	.	.	.	.	.
gene10183	.	.	.	.	.	.	.	.	.	.	.	.	.	.	.	.	.	.	.	.	.	.	.	.	.	.	.	.
gene10184	.	.	.	.	.	.	.	.	.	.	.	.	.	.	.	.	.	.	.	.	.	.	.	.	.	.	.	.
gene10185	mgp.L	mgp	LS	.	.	.	.	.	.	.	.	.	.	.	.	.	.	.	.	.	.	.	.	.	.	.	.	.
gene10186	pik3r6.L	pik3r6	LS	X	.	.	.	.	.	.	.	.	.	.	.	.	.	.	.	.	.	.	.	.	.	.	.	.
gene10187	polrmt.L	polrmt	L	X	.	.	.	.	.	D	.	.	.	e	.	.	.	.	.	.	.	.	.	.	.	.	e	.
gene10188	ermp1.L	ermp1	L	X	.	.	.	.	.	.	.	.	.	.	.	.	.	.	.	.	.	.	.	.	.	.	.	.
gene10189	ocel1.2.S	ocel1.2	LS	.	.	.	.	.	.	D	.	.	e	e	.	.	.	.	.	.	.	.	.	.	.	.	e	.
gene1019	stag1.L	stag1	LS	X	.	.	.	.	.	.	.	.	.	.	.	.	.	.	.	.	.	.	.	.	.	.	.	.
gene10190	exoc1.S	exoc1	LS	X	.	.	.	.	.	.	.	.	.	.	.	.	.	.	.	.	.	.	.	.	.	.	.	.
gene10191	.	.	.	.	.	.	.	X	.	D	.	.	e	.	e	.	.	.	.	.	.	.	.	.	.	.	e	.
gene10192	rnf144b.L	rnf144b	LS	X	.	.	.	.	.	.	.	.	.	.	.	.	.	.	.	.	.	.	.	.	.	.	.	.
gene10193	.	.	.	.	.	.	.	X	.	D	.	.	e	.	e	.	.	.	.	.	.	.	.	.	.	.	e	.
gene10194	fgf7.L	fgf7	LS	X	.	.	.	.	.	.	.	.	.	.	.	.	.	.	.	.	.	.	.	.	.	.	.	.
gene10195	atf1.S	atf1	LS	X	.	.	.	.	.	.	i	.	.	i	.	.	.	.	.	.	.	.	.	.	.	.	.	.
gene10196	spag7.L	spag7	L	X	.	.	.	.	.	.	i	.	.	i	.	i	.	.	.	.	.	.	.	.	.	.	.	.
gene10197	.	.	.	X	X	X	X	.	D	D	i	i	e	ei	.	i	i	.	i	.	ei	.	i	.	i	.	i	.
gene10198	tep1.L	tep1	L	X	.	.	.	.	.	.	.	.	.	.	.	.	.	.	.	.	.	.	.	.	.	.	.	.
gene10199	XB22063318.L [provisional]	XB22063318 [provisional]	L	X	.	.	.	.	.	U	.	.	.	.	.	.	.	.	.	.	.	.	.	.	.	.	.	e
gene102	zbtb24.L	zbtb24	L	X	.	.	.	.	.	.	.	.	.	.	.	.	.	.	.	.	.	.	.	.	.	.	.	.
gene1020	XB954544.L [provisional]	XB954544 [provisional]	L	.	.	.	.	.	.	.	.	.	.	.	.	.	.	.	.	.	.	.	.	.	.	.	.	.
gene10200	zdhhc8.S	zdhhc8	LS	X	.	.	.	.	.	.	.	.	.	.	.	.	.	.	.	.	.	.	.	.	.	.	.	.
gene10201	dpp10.L	dpp10	LS	.	.	.	.	.	.	.	.	.	.	.	.	.	.	.	.	.	.	.	.	.	.	.	.	.
gene10202	.	.	.	X	.	.	X	.	.	U	e	e	.	e	.	.	.	.	.	.	.	.	.	.	.	.	.	e
gene10203	c1orf127.L	c1orf127	L	.	.	.	.	X	.	.	.	.	.	.	e	.	.	.	.	.	.	.	.	.	.	.	.	.
gene10204	mypn.L	mypn	LS	.	.	.	.	.	.	.	.	.	.	.	.	.	.	.	.	.	.	.	.	.	.	.	.	.
gene10205	lrrc23.S	lrrc23	S	.	.	.	.	.	.	.	.	.	.	.	.	.	.	.	.	.	.	.	.	.	.	.	.	.
gene10206	.	.	.	X	.	.	.	.	.	.	.	.	.	.	.	.	.	.	.	.	.	.	.	.	.	.	.	.
gene10207	edem1.L	edem1	LS	X	.	.	.	.	.	.	.	.	.	.	.	.	.	.	.	.	.	.	.	.	.	.	.	.
gene10208	.	.	.	.	.	.	.	.	.	.	.	.	.	.	.	.	.	.	.	.	.	.	.	.	.	.	.	.
gene10209	ift57.S	ift57	S	X	.	.	.	.	.	.	.	.	.	.	.	.	.	.	.	.	.	.	.	.	.	.	.	.
gene1021	fam8a1.S	fam8a1	LS	X	.	X	X	X	.	.	i	ei	.	i	e	i	.	.	.	.	.	.	.	.	.	.	.	.
gene10210	.	.	.	.	.	.	.	.	.	.	.	.	.	.	.	.	.	.	.	.	.	.	.	.	.	.	.	.
gene10211	ubl7.S	ubl7	LS	X	.	.	.	.	.	.	.	.	.	.	.	.	.	.	.	.	.	.	.	.	.	.	.	.
gene10212	mrto4.L	mrto4	LS	X	.	.	.	.	.	.	.	.	.	.	.	.	.	.	.	.	.	.	.	.	.	.	.	.
gene10213	.	.	.	.	.	.	.	.	.	.	.	.	.	.	.	.	.	.	.	.	.	.	.	.	.	.	.	.
gene10214	ankrd63.L	ankrd63	L	X	.	.	.	.	.	.	.	.	e	e	.	.	.	.	.	.	.	.	.	.	.	.	.	.
gene10215	klhl18.L	klhl18	LS	X	.	.	X	.	U	.	i	i	.	i	.	.	.	i	.	.	.	.	.	.	.	.	.	.
gene10216	sec11c.L	sec11c	LS	X	.	.	.	.	.	.	.	.	.	.	.	.	.	.	.	.	.	.	.	.	.	.	.	.
gene10217	vcpip1.L	vcpip1	LS	X	.	.	.	.	.	.	.	.	.	.	.	.	.	.	.	.	.	.	.	.	.	.	.	.
gene10218	usp44.S	usp44	LS	X	.	.	.	.	.	.	.	.	.	.	.	.	.	.	.	.	.	.	.	.	.	.	.	.
gene10219	.	.	.	X	.	.	.	X	.	.	.	.	.	.	e	.	.	.	.	.	.	.	.	.	.	.	.	.
gene1022	opn1sw.L	opn1sw	L	.	.	.	.	.	.	.	.	.	.	.	.	.	.	.	.	.	.	.	.	.	.	.	.	.
gene10220	rpap3.L	rpap3	L	X	X	.	X	X	U	.	i	i	i	i	i	.	.	i	.	.	.	.	.	.	.	.	.	.
gene10221	.	.	.	.	.	.	.	.	.	.	.	.	.	.	.	.	.	.	.	.	.	.	.	.	.	.	.	.
gene10222	fbxo41.L	fbxo41	LS	.	.	.	.	.	.	.	.	.	.	.	.	.	.	.	.	.	.	.	.	.	.	.	.	.
gene10223	rpa1.L	rpa1	LS	X	.	.	X	.	U	U	i	i	.	i	.	.	.	i	.	i	.	i	.	.	.	.	.	i
gene10224	cryga.12.S	cryga.12	LS	.	.	.	.	.	.	.	.	.	.	.	.	.	.	.	.	.	.	.	.	.	.	.	.	.
gene10225	XB5872372.S [provisional]	XB5872372 [provisional]	LS	X	.	.	.	.	.	.	.	.	.	.	.	.	.	.	.	.	.	.	.	.	.	.	.	.
gene10226	pfkm.L	pfkm	LS	X	.	.	.	.	.	.	.	.	.	e	.	.	.	.	.	.	.	.	.	.	.	.	.	.
gene10227	fgfbp2.L	fgfbp2	LS	.	.	.	.	.	.	.	.	.	.	.	.	.	.	.	.	.	.	.	.	.	.	.	.	.
gene10228	mtap.L	mtap	L	X	.	.	.	.	.	U	.	.	.	.	.	.	.	.	.	.	.	.	.	.	.	.	.	e
gene10229	pdha1.L	pdha1	LS	X	.	.	.	.	.	.	.	.	.	.	.	.	.	.	.	.	.	.	.	.	.	.	.	.
gene1023	tnfaip1.L	tnfaip1	L	X	.	.	.	.	.	.	.	.	.	.	.	.	.	.	.	.	.	.	.	.	.	.	.	.
gene10230	.	.	.	X	.	.	.	.	.	D	.	.	.	.	.	.	.	.	.	.	.	.	.	.	.	.	e	.
gene10231	fggy.L	fggy	L	X	.	.	.	.	.	.	.	.	.	.	.	.	.	.	.	.	.	.	.	.	.	.	.	.
gene10232	.	.	.	X	.	.	X	.	U	.	i	i	.	i	.	.	.	i	.	.	.	.	.	.	.	.	.	.
gene10233	.	.	.	.	.	.	.	.	.	.	.	.	.	.	.	.	.	.	.	.	.	.	.	.	.	.	.	.
gene10234	ate1.S	ate1	LS	X	.	.	.	.	.	.	.	.	.	e	.	.	.	.	.	.	.	.	.	.	.	.	.	.
gene10235	.	.	.	.	.	.	.	.	.	.	.	.	.	.	.	.	.	.	.	.	.	.	.	.	.	.	.	.
gene10236	hrob.S	hrob	LS	X	.	.	.	.	.	.	.	.	.	.	.	.	.	.	.	.	.	.	.	.	.	.	.	.
gene10237	gtf3c6.L	gtf3c6	L	X	.	.	.	.	.	.	.	.	.	.	.	.	.	.	.	.	.	.	.	.	.	.	.	.
gene10238	rpl34.S	rpl34	LS	X	.	.	X	X	.	U	i	i	.	i	i	.	.	.	.	.	.	.	.	.	.	.	.	e
gene10239	tcf7.S	tcf7	S	X	.	X	X	X	U	D	i	i	.	i	i	i	.	i	.	.	.	.	.	.	i	.	.	.
gene1024	.	.	.	X	.	.	.	.	.	.	e	.	.	.	.	.	.	.	.	.	.	.	.	.	.	.	.	.
gene10240	adprhl1.S	adprhl1	LS	.	.	.	.	.	.	.	.	.	.	.	.	.	.	.	.	.	.	.	.	.	.	.	.	.
gene10241	.	.	.	.	.	.	.	.	.	.	.	.	.	.	.	.	.	.	.	.	.	.	.	.	.	.	.	.
gene10242	xylt1.L	xylt1	LS	X	.	X	X	X	D	D	i	i	.	i	ei	ei	.	.	.	.	i	.	i	.	i	.	ei	.
gene10243	septin6.L	septin6	LS	X	.	.	.	.	.	U	.	.	.	e	.	.	.	.	.	.	.	.	.	.	.	.	.	e
gene10244	kcne5.S	kcne5	LS	.	.	.	.	.	.	.	.	.	.	.	.	e	.	.	.	.	.	.	.	.	.	.	.	.
gene10245	actr3.S	actr3	LS	X	.	.	.	.	.	.	.	.	.	.	.	.	.	.	.	.	.	.	.	.	.	.	.	.
gene10246	myf5.L	myf5	LS	.	.	.	.	.	.	.	.	.	.	.	.	.	.	.	.	.	.	.	.	.	.	.	.	.
gene10247	odf3.L	odf3	LS	.	.	.	.	.	.	.	.	.	.	.	.	.	.	.	.	.	.	.	.	.	.	.	.	.
gene10248	trmt10b.S	trmt10b	S	X	.	.	.	.	.	.	.	.	.	.	.	.	.	.	.	.	.	.	.	.	.	.	.	.
gene10249	mtss1.2.S	mtss1.2	LS	X	X	X	X	X	U	D	i	i	i	i	ei	i	.	i	.	i	.	i	.	.	i	.	.	.
gene1025	smndc1.L	smndc1	LS	X	.	.	X	X	U	.	i	i	.	i	ei	.	.	i	.	i	.	i	.	.	.	.	.	.
gene10250	stab2.L	stab2	L	.	.	.	.	X	.	.	.	.	e	.	e	.	.	.	.	.	.	.	.	.	.	.	.	.
gene10251	pkd2.L	pkd2	L	X	.	.	.	.	.	.	.	.	.	.	.	.	.	.	.	.	.	.	.	.	.	.	.	.
gene10252	.	.	.	X	.	.	.	.	.	.	.	.	.	.	.	.	.	.	.	.	.	.	.	.	.	.	.	.
gene10253	gstt1-like.2.L	gstt1-like.2	L	.	.	.	.	.	.	.	.	.	.	.	.	.	.	.	.	.	.	.	.	.	.	.	.	.
gene10254	ltb.L	ltb	LS	X	.	.	.	.	.	.	.	.	.	.	.	.	.	.	.	.	.	.	.	.	.	.	.	.
gene10255	atp2c2.L	atp2c2	LS	.	.	.	.	.	.	.	.	.	.	.	.	.	.	.	.	.	.	.	.	.	.	.	.	.
gene10256	.	.	.	.	.	.	.	.	.	.	.	.	.	.	.	.	.	.	.	.	.	.	.	.	.	.	.	.
gene10257	star.S	star	LS	.	.	.	.	.	.	.	.	.	.	.	.	.	.	.	.	.	.	.	.	.	.	.	.	.
gene10258	med13l.L	med13l	LS	X	.	.	.	.	.	.	.	.	.	.	.	.	.	.	.	.	.	.	.	.	.	.	.	.
gene10259	tpte2.L	tpte2	LS	X	.	.	.	.	.	.	.	.	.	.	.	.	.	.	.	.	.	.	.	.	.	.	.	.
gene1026	sash3.L	sash3	LS	.	.	.	.	.	.	.	.	.	.	.	.	.	.	.	.	.	.	.	.	.	.	.	.	.
gene10260	slc13a4l.S	slc13a4l	LS	X	.	.	.	X	.	.	.	.	.	.	e	.	.	.	.	.	.	.	.	.	.	.	.	.
gene10261	kdelr3.L	kdelr3	LS	X	.	.	.	.	.	.	.	.	.	.	.	.	.	.	.	.	.	.	.	.	.	.	.	.
gene10262	ube2j1.L	ube2j1	LS	X	.	.	.	.	.	.	.	.	.	.	.	.	.	.	.	.	.	.	.	.	.	.	.	.
gene10263	elavl1.L	elavl1	LS	X	X	.	X	X	.	.	i	i	i	i	i	.	.	.	.	.	.	.	.	.	.	.	.	.
gene10264	slc4a9.L	slc4a9	L	.	.	.	.	.	.	D	i	.	.	i	.	ei	.	.	.	.	.	.	.	.	i	.	ei	.
gene10265	abhd15.L	abhd15	LS	X	.	.	.	.	.	.	.	.	.	.	.	.	.	.	.	.	.	.	.	.	.	.	.	.
gene10266	gzmh.S	gzmh	S	.	.	.	.	.	.	.	.	.	.	.	.	.	.	.	.	.	.	.	.	.	.	.	.	.
gene10267	rnf13.L	rnf13	LS	X	.	.	.	.	.	.	.	.	.	.	.	.	.	.	.	.	.	.	.	.	.	.	.	.
gene10268	XB5932119.L [provisional]	XB5932119 [provisional]	L	X	.	.	.	.	.	.	.	.	.	.	.	.	.	.	.	.	.	.	.	.	.	.	.	.
gene10269	bcl2l2.L	bcl2l2	LS	X	.	.	X	.	.	.	i	i	.	i	.	.	.	.	.	.	.	.	.	.	.	.	.	.
gene1027	cracr2b.S	cracr2b	LS	X	.	.	.	.	.	.	.	.	.	.	.	.	.	.	.	.	.	.	.	.	.	.	.	.
gene10270	immp2l.L	immp2l	L	X	.	.	.	.	.	.	.	.	e	.	.	.	.	.	.	.	.	.	.	.	.	.	.	.
gene10271	sema3c.S	sema3c	LS	X	.	.	.	.	.	.	.	.	.	.	.	.	.	.	.	.	.	.	.	.	.	.	.	.
gene10272	vps53.S	vps53	LS	X	.	.	.	.	.	.	.	.	.	.	.	.	.	.	.	.	.	.	.	.	.	.	.	.
gene10273	.	.	.	.	.	.	.	.	.	D	.	.	.	.	.	.	.	.	.	.	.	.	.	.	.	.	e	.
gene10274	rab1a.S	rab1a	LS	X	.	X	X	X	U	D	i	i	.	i	ei	i	.	i	.	.	.	.	.	.	i	.	.	.
gene10275	rev1.S	rev1	LS	X	.	.	.	.	.	.	.	.	ei	ei	.	.	.	.	.	.	.	.	.	.	.	.	.	.
gene10276	.	.	.	.	.	.	.	.	.	.	.	.	.	.	.	.	.	.	.	.	.	.	.	.	.	.	.	.
gene10277	aga.L	aga	L	X	.	.	.	.	.	.	.	.	.	.	.	.	.	.	.	.	.	.	.	.	.	.	.	.
gene10278	arl1.L	arl1	LS	X	.	.	X	X	D	.	i	i	.	i	ei	.	.	.	.	.	i	.	.	.	.	.	.	.
gene10279	.	.	.	X	.	.	.	.	.	.	.	.	.	.	.	.	.	.	.	.	.	.	.	.	.	.	.	.
gene1028	igf2.L	igf2	LS	X	.	.	.	X	.	.	.	.	.	.	e	.	.	.	.	.	.	.	.	.	.	.	.	.
gene10280	svep1l.S	svep1l	LS	.	.	.	.	.	.	D	.	.	.	.	.	.	.	.	.	.	.	.	.	.	.	.	e	.
gene10281	sh2d6.L	sh2d6	L	.	.	.	.	.	.	.	.	.	.	.	.	.	.	.	.	.	.	.	.	.	.	.	.	.
gene10282	.	.	.	.	.	.	.	.	.	.	.	.	.	.	.	.	.	.	.	.	.	.	.	.	.	.	.	.
gene10283	.	.	.	X	.	.	.	.	.	.	.	.	.	e	.	.	.	.	.	.	.	.	.	.	.	.	.	.
gene10284	sppl2b.L	sppl2b	LS	.	.	.	.	.	.	.	.	.	.	.	.	.	.	.	.	.	.	.	.	.	.	.	.	.
gene10285	nme5.L	nme5	L	X	.	.	.	.	.	.	.	.	e	e	.	.	.	.	.	.	.	.	.	.	.	.	.	.
gene10286	fbxo3.S	fbxo3	LS	X	.	.	.	.	.	.	.	.	.	.	.	.	.	.	.	.	.	.	.	.	.	.	.	.
gene10287	sox10.S	sox10	LS	.	.	.	.	.	.	.	.	.	.	.	.	.	.	.	.	.	.	.	.	.	.	.	.	.
gene10288	klhdc9.L	klhdc9	L	.	.	.	.	.	.	.	.	.	.	.	.	.	.	.	.	.	.	.	.	.	.	.	.	.
gene10289	.	.	.	.	.	.	.	.	.	.	.	.	.	.	.	.	.	.	.	.	.	.	.	.	.	.	.	.
gene1029	anxa11.S	anxa11	LS	X	.	.	.	.	.	.	.	.	.	.	.	.	.	.	.	.	.	.	.	.	.	.	.	.
gene10290	krt15.1.L	krt15.1	LS	.	.	.	.	.	.	.	.	.	.	.	.	.	.	.	.	.	.	.	.	.	.	.	.	.
gene10291	.	.	.	X	X	X	X	X	U	D	i	i	ei	ei	i	i	.	i	.	.	.	i	.	.	i	.	i	.
gene10292	.	.	.	.	.	.	.	.	.	.	.	.	.	.	.	.	.	.	.	.	.	.	.	.	.	.	.	.
gene10293	.	.	.	X	.	.	.	.	.	.	.	.	.	.	.	.	.	.	.	.	.	.	.	.	.	.	.	.
gene10294	klhl40.L	klhl40	LS	.	.	.	.	.	.	.	.	.	.	.	.	.	.	.	.	.	.	.	.	.	.	.	.	.
gene10295	dpp10.S	dpp10	LS	.	.	.	.	.	.	.	.	.	.	.	.	.	.	.	.	.	.	.	.	.	.	.	.	.
gene10296	cst3.L	cst3	LS	X	.	.	.	.	.	.	.	.	i	.	.	.	.	.	.	.	.	.	.	.	.	.	.	.
gene10297	tex47.L	tex47	L	.	.	.	.	.	.	.	.	.	.	.	.	.	.	.	.	.	.	.	.	.	.	.	.	.
gene10298	ascl2.L	ascl2	LS	.	.	.	.	.	.	D	.	.	.	.	.	e	.	.	.	.	.	.	.	.	e	.	e	.
gene10299	naf1.L	naf1	L	X	.	.	X	.	U	.	i	i	.	i	.	.	.	i	.	.	.	.	.	.	.	.	.	.
gene103	atp2b4.S	atp2b4	LS	.	.	.	.	.	.	.	.	.	.	.	.	.	.	.	.	.	.	.	.	.	.	.	.	.
gene1030	epyc.L	epyc	LS	.	.	.	.	.	.	.	.	.	.	.	.	.	.	.	.	.	.	.	.	.	.	.	.	.
gene10300	ttbk2.L	ttbk2	LS	X	.	.	.	.	.	.	.	.	.	.	.	.	.	.	.	.	.	.	.	.	.	.	.	.
gene10301	kcnj8.S	kcnj8	LS	.	.	.	.	.	.	.	.	.	.	.	.	.	.	.	.	.	.	.	.	.	.	.	.	.
gene10302	rho.S	rho	LS	.	.	.	.	.	.	.	.	.	.	.	.	.	.	.	.	.	.	.	.	.	.	.	.	.
gene10303	acat1.S	acat1	LS	X	.	.	.	X	.	.	.	.	.	.	e	.	.	.	.	.	.	.	.	.	.	.	.	.
gene10304	slc35e3.S	slc35e3	S	X	.	.	.	.	.	.	.	.	.	.	.	.	.	.	.	.	.	.	.	.	.	.	.	.
gene10305	atp6v0a4.L	atp6v0a4	L	.	.	.	.	.	.	.	.	.	.	.	.	.	.	.	.	.	.	.	.	.	.	.	.	.
gene10306	pard3.L	pard3	LS	X	.	.	.	.	.	.	.	.	.	.	.	.	.	.	.	.	.	.	.	.	.	.	.	.
gene10307	kif22.S	kif22	LS	X	X	.	X	X	.	.	i	i	i	i	ei	.	.	.	.	.	.	.	.	.	.	.	.	.
gene10308	.	.	.	.	.	.	.	.	.	.	.	.	.	.	.	.	.	.	.	.	.	.	.	.	.	.	.	.
gene10309	cln8.L	cln8	LS	X	.	.	.	.	.	.	.	.	.	.	.	.	.	.	.	.	.	.	.	.	.	.	.	.
gene1031	.	.	.	.	.	.	.	.	.	.	.	.	.	.	.	.	.	.	.	.	.	.	.	.	.	.	.	.
gene10310	stat6.L	stat6	L	X	.	.	.	.	.	.	.	.	.	.	.	.	.	.	.	.	.	.	.	.	.	.	.	.
gene10311	.	.	.	X	.	.	.	X	.	.	.	.	.	.	i	.	.	.	.	.	.	.	.	.	.	.	.	.
gene10312	psmd2.L	psmd2	LS	X	.	.	.	.	.	.	.	.	.	.	.	.	.	.	.	.	.	.	.	.	.	.	.	.
gene10313	rpl18a.S	rpl18a	LS	X	.	.	X	X	.	.	i	i	.	i	i	.	.	.	.	.	.	.	.	.	.	.	.	.
gene10314	faf1.L	faf1	LS	X	.	.	.	.	.	.	.	.	.	.	.	.	.	.	.	.	.	.	.	.	.	.	.	.
gene10315	rad9b.L	rad9b	L	.	.	.	.	.	.	.	.	.	.	.	.	.	.	.	.	.	.	.	.	.	.	.	.	.
gene10316	aldh7a1.L	aldh7a1	LS	X	.	.	.	.	.	.	.	.	.	.	.	.	.	.	.	.	.	.	.	.	.	.	.	.
gene10317	mxra8.S	mxra8	LS	.	.	.	.	.	.	.	.	.	.	.	.	.	.	.	.	.	.	.	.	.	.	.	.	.
gene10318	bcl3.L	bcl3	LS	.	.	.	.	.	.	.	.	.	.	.	.	.	.	.	.	.	.	.	.	.	.	.	.	.
gene10319	myos.L	myos	LS	.	.	.	.	.	.	.	.	.	.	.	.	.	.	.	.	.	.	.	.	.	.	.	.	.
gene1032	mdm2.L	mdm2	LS	X	.	.	X	.	U	.	ei	i	.	i	.	.	.	i	.	.	.	i	.	.	.	.	.	.
gene10320	cct6a.S	cct6a	LS	X	.	.	X	X	.	.	i	i	.	i	i	.	.	.	.	.	.	.	.	.	.	.	.	.
gene10321	znrd2.L	znrd2	LS	X	.	.	.	.	.	.	.	.	e	.	.	.	.	.	.	.	.	.	.	.	.	.	.	.
gene10322	.	.	.	X	.	.	.	.	.	.	.	.	.	.	.	.	.	.	.	.	.	.	.	.	.	.	.	.
gene10323	nprl3.L	nprl3	L	X	.	.	.	.	.	.	.	.	.	.	.	.	.	.	.	.	.	.	.	.	.	.	.	.
gene10324	rack1.S	rack1	LS	X	.	.	.	X	.	.	i	.	i	i	i	.	.	.	.	.	.	.	.	.	.	.	.	.
gene10325	mark1.L	mark1	LS	X	.	.	.	.	.	.	.	.	.	.	.	.	.	.	.	.	.	.	.	.	.	.	.	.
gene10326	elf5l.L	elf5l	L	.	.	.	.	.	.	.	.	.	.	.	.	.	.	.	.	.	.	.	.	.	.	.	.	.
gene10327	.	.	.	.	.	.	.	.	.	.	.	.	.	.	.	.	.	.	.	.	.	.	.	.	.	.	.	.
gene10328	psmc3ip.L	psmc3ip	L	X	.	.	.	.	.	.	.	.	.	.	.	e	.	.	.	.	.	.	.	.	.	.	.	.
gene10329	tstd2.S	tstd2	LS	X	.	.	.	.	.	.	.	.	.	.	.	.	.	.	.	.	.	.	.	.	.	.	.	.
gene1033	ap4m1.S	ap4m1	LS	X	.	.	.	.	.	.	.	.	.	.	.	.	.	.	.	.	.	.	.	.	.	.	.	.
gene10330	isoc1.L	isoc1	LS	X	.	.	.	.	.	.	.	.	.	.	.	.	.	.	.	.	.	.	.	.	.	.	.	.
gene10331	.	.	.	.	.	.	.	.	.	.	.	.	.	.	.	.	.	.	.	.	.	.	.	.	.	.	.	.
gene10332	tcp11l2.L	tcp11l2	LS	X	.	.	.	X	.	.	.	.	.	.	e	.	.	.	.	.	.	.	.	.	.	.	.	.
gene10333	slc35e1.L	slc35e1	LS	X	X	.	X	X	.	.	i	i	i	i	i	.	.	.	.	.	.	.	.	.	.	.	.	.
gene10334	.	.	.	.	.	.	.	.	.	.	.	.	.	.	.	.	.	.	.	.	.	.	.	.	.	.	.	.
gene10335	stx18.L	stx18	LS	X	.	.	.	.	.	.	.	.	.	.	.	.	.	.	.	.	.	.	.	.	.	.	.	.
gene10336	gria3.S	gria3	LS	.	.	.	.	.	.	.	.	.	.	.	.	.	.	.	.	.	.	.	.	.	.	.	.	.
gene10337	ttc9b.L	ttc9b	LS	.	.	.	.	.	.	.	.	.	.	.	.	.	.	.	.	.	.	.	.	.	.	.	.	.
gene10338	znf407.S	znf407	LS	X	.	.	.	.	.	.	.	.	.	.	.	.	.	.	.	.	.	.	.	.	.	.	.	.
gene10339	calhm6.L	calhm6	L	.	.	.	.	.	.	.	.	.	.	.	.	.	.	.	.	.	.	.	.	.	.	.	.	.
gene1034	gns.S	gns	LS	X	.	.	.	.	.	.	.	.	.	.	.	.	.	.	.	.	.	.	.	.	.	.	.	.
gene10340	rassf10.L	rassf10	LS	X	.	.	.	X	U	.	.	.	e	e	e	.	.	e	.	e	.	e	.	.	.	.	.	.
gene10341	dcdc2b.L	dcdc2b	L	.	.	.	.	.	.	.	.	.	.	.	.	.	.	.	.	.	.	.	.	.	.	.	.	.
gene10342	c9orf85.L	c9orf85	LS	X	.	.	.	.	.	.	.	.	.	.	.	.	.	.	.	.	.	.	.	.	.	.	.	.
gene10343	snrnp25.S	snrnp25	S	X	.	.	.	.	.	.	.	.	.	.	.	.	.	.	.	.	.	.	.	.	.	.	.	.
gene10344	gpbp1l1.L	gpbp1l1	LS	X	.	.	.	.	.	.	.	.	.	.	.	.	.	.	.	.	.	.	.	.	.	.	.	.
gene10345	stac3.L	stac3	LS	.	.	.	.	.	.	.	.	.	.	.	.	.	.	.	.	.	.	.	.	.	.	.	.	.
gene10346	.	.	.	.	.	.	.	.	.	.	.	.	.	.	.	.	.	.	.	.	.	.	.	.	.	.	.	.
gene10347	cdh5.L	cdh5	LS	.	.	.	.	.	.	.	.	.	.	e	.	.	.	.	.	.	.	.	.	.	.	.	.	.
gene10348	icmt.S	icmt	LS	X	.	.	.	.	.	.	.	.	.	.	.	.	.	.	.	.	.	.	.	.	.	.	.	.
gene10349	slc4a1.L	slc4a1	LS	X	.	.	.	.	.	.	.	.	.	.	.	.	.	.	.	.	.	.	.	.	.	.	.	.
gene1035	cth.L	cth	LS	X	.	.	.	.	.	D	i	.	.	i	.	i	.	.	.	.	.	.	.	.	i	.	i	.
gene10350	c8b.L	c8b	L	.	.	.	.	.	.	.	.	.	.	.	.	.	.	.	.	.	.	.	.	.	.	.	.	.
gene10351	cyyr1.L	cyyr1	LS	X	.	.	.	X	.	.	.	.	.	.	e	.	.	.	.	.	.	.	.	.	.	.	.	.
gene10352	lcmt1.S	lcmt1	LS	X	.	.	.	.	.	.	.	.	.	.	.	.	.	.	.	.	.	.	.	.	.	.	.	.
gene10353	rassf8.L	rassf8	LS	X	.	X	X	.	U	.	i	i	.	i	.	i	.	i	.	i	.	i	.	.	.	.	.	.
gene10354	ufd1.S	ufd1	LS	X	.	.	.	.	.	.	.	.	.	.	.	.	.	.	.	.	.	.	.	.	.	.	.	.
gene10355	gsc.S	gsc	LS	.	.	X	X	X	.	D	ei	ei	.	ei	e	ei	.	.	.	.	.	.	.	.	ei	.	.	.
gene10356	mgc108429.L	mgc108429	L	X	.	.	.	.	.	.	.	.	.	i	.	.	.	.	.	.	.	.	.	.	.	.	.	.
gene10357	sgpp2.L	sgpp2	LS	X	.	.	.	.	.	D	.	.	e	.	.	.	.	.	.	.	.	.	.	.	.	.	e	.
gene10358	c1qtnf1.S	c1qtnf1	LS	.	.	.	.	.	.	.	.	.	.	.	.	.	.	.	.	.	.	.	.	.	.	.	.	.
gene10359	fkbp8.L	fkbp8	LS	X	.	.	.	.	.	.	.	.	.	.	.	.	.	.	.	.	.	.	.	.	.	.	.	.
gene1036	p2rx5.L	p2rx5	LS	.	.	.	.	.	.	.	.	.	.	.	.	.	.	.	.	.	.	.	.	.	.	.	.	.
gene10360	mrpl28.L	mrpl28	L	X	.	.	.	.	.	.	.	.	.	.	.	.	.	.	.	.	.	.	.	.	.	.	.	.
gene10361	nuggc.L	nuggc	LS	X	.	.	.	.	.	.	.	.	.	.	.	.	.	.	.	.	.	.	.	.	.	.	.	.
gene10362	prpf31.L	prpf31	LS	X	X	.	X	X	.	.	i	i	e	i	i	.	.	.	.	.	.	.	.	.	.	.	.	.
gene10363	kiaa1328.L	kiaa1328	L	X	.	.	.	.	.	.	.	.	.	.	.	.	.	.	.	.	.	.	.	.	.	.	.	.
gene10364	.	.	.	X	.	.	.	X	.	.	.	.	e	.	e	.	.	.	.	.	.	.	.	.	.	.	.	.
gene10365	mindy1.L	mindy1	LS	X	.	.	.	.	.	.	.	.	.	.	.	.	.	.	.	.	.	.	.	.	.	.	.	.
gene10366	.	.	.	X	.	.	.	.	.	.	.	.	.	.	.	.	.	.	.	.	.	.	.	.	.	.	.	.
gene10367	.	.	.	X	.	.	.	.	.	.	.	.	.	.	.	.	.	.	.	.	.	.	.	.	.	.	.	.
gene10368	lgalsl.L	lgalsl	LS	X	.	.	.	X	.	.	.	.	.	.	e	.	.	.	.	.	.	.	.	.	.	.	.	.
gene10369	XB5827395.L [provisional]	XB5827395 [provisional]	L	X	.	.	.	.	.	U	.	.	.	.	.	.	.	.	.	.	.	.	.	.	.	.	.	e
gene1037	boc.L	boc	LS	X	.	.	.	.	.	.	.	.	.	.	.	.	.	.	.	.	.	.	.	.	.	.	.	.
gene10370	gpt.S	gpt	LS	X	.	.	.	.	.	.	.	.	.	e	.	.	.	.	.	.	.	.	.	.	.	.	.	.
gene10371	klhl20.S	klhl20	LS	X	.	.	.	.	.	.	.	.	.	.	.	.	.	.	.	.	.	.	.	.	.	.	.	.
gene10372	lmo4.1.S	lmo4.1	LS	X	X	X	X	X	D	D	i	i	i	i	i	i	i	.	i	.	i	.	i	.	i	.	i	.
gene10373	wdfy2.S	wdfy2	LS	X	.	.	.	.	.	.	.	.	.	.	.	.	.	.	.	.	.	.	.	.	.	.	.	.
gene10374	yrdc.L	yrdc	LS	X	X	.	X	X	.	.	i	i	i	i	i	.	.	.	.	.	.	.	.	.	.	.	.	.
gene10375	mcam.L	mcam	LS	X	.	.	.	.	.	.	.	.	.	.	.	.	.	.	.	.	.	.	.	.	.	.	.	.
gene10376	lrrc14.L	lrrc14	L	X	.	.	.	.	.	.	.	.	.	i	.	.	.	.	.	.	.	.	.	.	.	.	.	.
gene10377	thumpd1.L	thumpd1	LS	X	.	.	.	X	.	.	.	.	.	.	ei	.	.	.	.	.	.	.	.	.	.	.	.	.
gene10378	znf33a.L	znf33a	L	X	X	.	X	.	D	.	ei	ei	e	ei	.	.	ei	.	.	.	ei	.	.	.	.	.	.	.
gene10379	.	.	.	X	X	X	X	.	.	D	i	i	ei	i	.	i	.	.	.	.	.	.	.	.	i	.	.	.
gene1038	.	.	.	.	.	.	.	.	.	.	.	.	.	.	.	.	.	.	.	.	.	.	.	.	.	.	.	.
gene10380	tom1.S	tom1	LS	X	.	.	.	.	.	.	.	.	.	.	.	.	.	.	.	.	.	.	.	.	.	.	.	.
gene10381	mettl21ep.L	mettl21ep	LS	.	.	.	.	.	.	.	.	.	.	.	.	.	.	.	.	.	.	.	.	.	.	.	.	.
gene10382	rnf8.L	rnf8	LS	X	.	.	.	.	.	.	.	.	.	i	.	.	.	.	.	.	.	.	.	.	.	.	.	.
gene10383	fau.L	fau	LS	X	.	.	.	X	.	.	.	.	.	i	e	.	.	.	.	.	.	.	.	.	.	.	.	.
gene10384	slc49a4.L	slc49a4	LS	X	.	.	.	.	.	.	.	.	.	.	.	.	.	.	.	.	.	.	.	.	.	.	.	.
gene10385	wasf3.L	wasf3	LS	X	.	.	.	.	.	.	.	.	.	.	.	.	.	.	.	.	.	.	.	.	.	.	.	.
gene10386	stx5.S	stx5	LS	X	.	.	.	.	.	.	.	.	i	i	.	.	.	.	.	.	.	.	.	.	.	.	.	.
gene10387	mcmdc2.L	mcmdc2	L	X	.	.	.	.	.	.	.	.	.	.	.	.	.	.	.	.	.	.	.	.	.	.	.	.
gene10388	.	.	.	.	.	.	.	.	.	.	.	.	.	.	.	.	.	.	.	.	.	.	.	.	.	.	.	.
gene10389	pals1.L	pals1	LS	X	.	X	X	.	U	.	i	i	.	i	.	i	.	i	.	i	.	i	.	.	.	.	.	.
gene1039	ing2.S	ing2	LS	X	.	X	X	.	U	.	i	i	.	i	.	i	.	i	.	i	.	i	.	.	.	.	.	.
gene10390	.	.	.	.	.	.	.	.	.	.	.	.	.	.	.	.	.	.	.	.	.	.	.	.	.	.	.	.
gene10391	pfkfb4.S	pfkfb4	LS	X	.	.	.	.	.	.	.	.	.	.	.	.	.	.	.	.	.	.	.	.	.	.	.	.
gene10392	XB989596.S [provisional:ifit5]	XB989596 [provisional:ifit5]	S	.	.	.	.	.	.	.	.	.	.	.	.	.	.	.	.	.	.	.	.	.	.	.	.	.
gene10393	XB5960368.L [provisional:eva1c]	XB5960368 [provisional:eva1c]	L	.	.	.	.	.	.	.	.	.	.	.	.	.	.	.	.	.	.	.	.	.	.	.	.	.
gene10394	ccdc17.L	ccdc17	L	.	.	.	.	.	.	.	.	.	.	.	.	.	.	.	.	.	.	.	.	.	.	.	.	.
gene10395	.	.	.	.	.	.	.	.	.	.	.	.	.	e	.	.	.	.	.	.	.	.	.	.	.	.	.	.
gene10396	tmco3.L	tmco3	L	X	.	X	X	X	.	D	i	i	.	i	e	i	.	.	.	.	.	.	i	.	i	.	.	.
gene10397	tal1.L	tal1	LS	.	.	.	.	.	.	D	.	.	.	.	.	e	.	.	.	.	.	.	.	.	.	.	e	.
gene10398	siva1.S	siva1	LS	X	.	.	X	.	.	.	i	i	.	i	.	.	.	.	.	.	.	.	.	.	.	.	.	.
gene10399	mob2.2.S	mob2.2	LS	X	.	.	X	X	D	.	i	i	.	i	i	.	i	.	.	.	i	.	.	.	.	.	.	.
gene104	llgl1.S	llgl1	S	X	.	.	.	.	.	.	.	.	.	.	.	.	.	.	.	.	.	.	.	.	.	.	.	.
gene1040	clns1a.L	clns1a	LS	X	.	X	X	.	.	D	i	i	.	i	.	i	.	.	.	.	.	.	.	.	i	.	.	.
gene10400	.	.	.	X	.	.	.	X	.	D	.	.	.	.	e	.	.	.	.	.	.	.	.	.	.	.	e	.
gene10401	.	.	.	X	.	.	.	.	.	.	.	.	.	.	.	.	.	.	.	.	.	.	.	.	.	.	.	.
gene10402	.	.	.	X	.	.	.	.	.	D	.	.	.	.	.	.	.	.	.	.	.	.	.	.	.	.	e	.
gene10403	cops2.S	cops2	LS	X	.	.	.	.	.	.	.	.	.	.	.	.	.	.	.	.	.	.	.	.	.	.	.	.
gene10404	agtrap.L	agtrap	L	X	.	.	.	.	.	.	.	.	.	.	.	.	.	.	.	.	.	.	.	.	.	.	.	.
gene10405	.	.	.	X	.	.	.	.	.	.	.	.	.	.	.	.	.	.	.	.	.	.	.	.	.	.	.	.
gene10406	.	.	.	X	.	.	.	.	.	.	.	.	.	.	.	.	.	.	.	.	.	.	.	.	.	.	.	.
gene10407	slc41a3.S	slc41a3	LS	.	.	.	.	.	.	D	.	.	.	.	.	.	.	.	.	.	.	.	.	.	.	.	e	.
gene10408	pag1.L	pag1	LS	X	.	.	.	.	.	.	.	.	.	.	.	.	.	.	.	.	.	.	.	.	.	.	.	.
gene10409	rgp1.L	rgp1	LS	X	.	.	.	.	.	.	.	.	.	.	.	.	.	.	.	.	.	.	.	.	.	.	.	.
gene1041	cfp.L	cfp	L	.	.	.	.	X	.	.	.	.	.	.	e	.	.	.	.	.	.	.	.	.	.	.	.	.
gene10410	rpl39.S	rpl39	LS	X	.	.	.	X	.	.	.	.	.	.	e	.	.	.	.	.	.	.	.	.	.	.	.	.
gene10411	ubl3.S	ubl3	LS	X	.	.	.	.	.	.	.	.	.	.	.	.	.	.	.	.	.	.	.	.	.	.	.	.
gene10412	.	.	.	.	.	.	.	.	.	.	.	.	.	.	.	.	.	.	.	.	.	.	.	.	.	.	.	.
gene10413	bet1l.S	bet1l	S	X	.	.	.	.	.	.	i	.	e	i	.	.	.	.	.	.	.	.	.	.	.	.	.	.
gene10414	.	.	.	.	.	.	.	.	.	.	.	.	.	.	.	.	.	.	.	.	.	.	.	.	.	.	.	.
gene10415	lsm11.S	lsm11	S	X	.	.	.	.	D	.	.	.	.	.	.	.	.	.	e	.	e	.	.	.	.	.	.	.
gene10416	cul4b.S	cul4b	LS	X	.	X	X	X	U	.	i	i	.	i	i	i	.	.	.	i	.	.	.	.	.	.	.	.
gene10417	.	.	.	.	.	.	.	.	.	.	.	.	.	.	.	.	.	.	.	.	.	.	.	.	.	.	.	.
gene10418	ttc7a.S	ttc7a	LS	.	.	.	.	X	.	.	.	.	.	.	e	.	.	.	.	.	.	.	.	.	.	.	.	.
gene10419	pxn.L	pxn	LS	X	.	.	.	.	.	.	.	.	.	.	.	.	.	.	.	.	.	.	.	.	.	.	.	.
gene1042	sp5l.L	sp5l	LS	.	X	X	X	X	D	D	ei	ei	i	ei	e	ei	.	.	.	.	ei	.	ei	.	ei	.	.	.
gene10420	.	.	.	.	.	.	.	.	.	.	.	.	.	.	.	.	.	.	.	.	.	.	.	.	.	.	.	.
gene10421	plekhj1.L	plekhj1	L	X	.	.	X	X	U	.	i	i	.	i	ei	.	.	i	.	.	.	i	.	.	.	.	.	.
gene10422	.	.	.	X	.	.	.	.	.	.	.	.	.	.	.	.	.	.	.	.	.	.	.	.	.	.	.	.
gene10423	cfap43.L	cfap43	L	X	.	.	.	.	.	.	.	.	.	e	.	.	.	.	.	.	.	.	.	.	.	.	.	.
gene10424	dctd.L	dctd	L	X	.	.	.	.	.	.	.	.	.	.	.	.	.	.	.	.	.	.	.	.	.	.	.	.
gene10425	.	.	.	.	.	.	.	.	.	.	.	.	.	.	.	.	.	.	.	.	.	.	.	.	.	.	.	.
gene10426	cacna1g.L	cacna1g	L	.	.	.	.	.	.	.	.	.	.	.	.	.	.	.	.	.	.	.	.	.	.	.	.	.
gene10427	cidec.L	cidec	LS	X	.	.	.	.	.	.	.	.	.	.	.	.	.	.	.	.	.	.	.	.	.	.	.	.
gene10428	.	.	.	.	.	.	.	.	.	.	.	.	.	e	.	.	.	.	.	.	.	.	.	.	.	.	.	.
gene10429	shisa1.1.L	shisa1.1	L	X	.	.	X	.	.	.	i	i	.	i	.	.	.	.	.	.	.	.	.	.	.	.	.	.
gene1043	ptges.L	ptges	LS	X	.	.	.	.	.	.	.	.	.	.	.	.	.	.	.	.	.	.	.	.	.	.	.	.
gene10430	clic4.L	clic4	LS	X	.	.	.	.	D	U	.	.	e	e	.	.	.	.	.	.	.	.	.	.	.	.	.	e
gene10431	grp.S	grp	LS	.	.	.	.	.	.	.	.	.	.	.	.	.	.	.	.	.	.	.	.	.	.	.	.	.
gene10432	ap1g1.L	ap1g1	LS	X	.	.	.	.	.	.	.	.	.	.	.	.	.	.	.	.	.	.	.	.	.	.	.	.
gene10433	.	.	.	.	.	.	.	.	.	.	.	.	.	.	.	.	.	.	.	.	.	.	.	.	.	.	.	.
gene10434	rbm17.S	rbm17	LS	X	.	.	.	.	.	.	.	.	.	.	.	.	.	.	.	.	.	.	.	.	.	.	.	.
gene10435	.	.	.	.	.	.	.	.	.	.	.	.	e	.	.	.	.	.	.	.	.	.	.	.	.	.	.	.
gene10436	.	.	.	.	.	.	.	.	.	.	.	.	.	.	.	.	.	.	.	.	.	.	.	.	.	.	.	.
gene10437	edar.L	edar	LS	.	.	.	.	.	.	.	.	.	.	.	.	.	.	.	.	.	.	.	.	.	.	.	.	.
gene10438	dennd2c.S	dennd2c	LS	.	.	.	.	X	.	.	.	.	.	.	e	.	.	.	.	.	.	.	.	.	.	.	.	.
gene10439	cldn4.L	cldn4	LS	X	.	X	X	X	U	.	e	e	.	e	e	e	.	e	.	.	.	e	.	.	.	.	.	.
gene1044	fzd8.S	fzd8	LS	.	X	X	X	X	U	D	e	e	e	e	e	e	.	.	.	.	.	.	e	.	e	.	e	.
gene10440	znf577.L	znf577	LS	X	.	.	.	.	.	.	.	.	.	.	.	.	.	.	.	.	.	.	.	.	.	.	.	.
gene10441	kpna7.S	kpna7	LS	X	.	.	.	.	.	.	.	.	.	.	.	.	.	.	.	.	.	.	.	.	.	.	.	.
gene10442	rrad.L	rrad	LS	.	.	.	.	.	.	.	.	.	.	.	.	.	.	.	.	.	.	.	.	.	.	.	.	.
gene10443	cdc25b.L	cdc25b	LS	.	X	X	X	X	D	D	ei	ei	e	ei	e	ei	ei	.	ei	.	ei	.	ei	.	ei	.	ei	.
gene10444	uggt2.S	uggt2	LS	.	.	.	.	.	.	.	.	.	.	.	.	.	.	.	.	.	.	.	.	.	.	.	.	.
gene10445	cpne7.S	cpne7	S	.	.	.	.	X	.	.	.	.	.	.	e	.	.	.	.	.	.	.	.	.	.	.	.	.
gene10446	.	.	.	.	.	.	.	.	.	.	.	.	.	.	.	.	.	.	.	.	.	.	.	.	.	.	.	.
gene10447	bcl9.S	bcl9	LS	X	X	X	X	X	U	D	i	i	i	i	e	i	.	i	.	i	.	i	.	.	i	.	.	.
gene10448	slc9a3r1.S	slc9a3r1	LS	X	.	.	.	.	.	.	.	.	.	.	.	.	.	.	.	.	.	.	.	.	.	.	.	.
gene10449	satpa.L	satpa	L	X	.	.	.	.	.	U	.	.	.	.	.	.	.	.	.	.	.	.	.	.	.	.	.	e
gene1045	znf319.L	znf319	LS	X	.	.	.	.	.	.	.	.	.	i	.	.	.	.	.	.	.	.	.	.	.	.	.	.
gene10450	znf830.S	znf830	S	X	.	.	.	.	.	.	.	.	.	.	.	.	.	.	.	.	.	.	.	.	.	.	.	.
gene10451	.	.	.	.	.	.	.	X	.	.	.	.	e	e	e	.	.	.	.	.	.	.	.	.	.	.	.	.
gene10452	c1galt1.S	c1galt1	LS	X	.	.	.	.	.	.	.	.	.	.	.	.	.	.	.	.	.	.	.	.	.	.	.	.
gene10453	znrf1.L	znrf1	LS	X	X	X	X	.	U	D	i	i	i	i	.	i	.	i	.	.	.	.	.	.	i	.	.	.
gene10454	.	.	.	.	.	.	.	.	.	.	.	.	.	.	.	.	.	.	.	.	.	.	.	.	.	.	.	.
gene10455	rbis.L	rbis	LS	.	.	.	.	.	.	U	.	.	.	.	.	.	.	.	.	.	.	.	.	.	.	.	.	e
gene10456	nktr.L	nktr	LS	.	.	.	.	.	.	.	.	.	.	.	.	.	.	.	.	.	.	.	.	.	.	.	.	.
gene10457	ruvbl2.L	ruvbl2	LS	X	.	.	.	.	.	.	.	.	.	.	.	.	.	.	.	.	.	.	.	.	.	.	.	.
gene10458	donson.L	donson	L	X	.	.	.	.	.	.	.	i	i	i	.	.	.	.	.	.	.	.	.	.	.	.	.	.
gene10459	supv3l1.S	supv3l1	S	X	.	.	.	.	.	.	.	.	.	.	.	.	.	.	.	.	.	.	.	.	.	.	.	.
gene1046	lrch1.S	lrch1	LS	X	.	.	.	.	.	.	.	.	.	.	.	.	.	.	.	.	.	.	.	.	.	.	.	.
gene10460	ankrd1.L	ankrd1	LS	.	.	.	.	.	.	.	.	.	.	.	.	.	.	.	.	.	.	.	.	.	.	.	.	.
gene10461	.	.	.	X	.	.	.	.	.	.	.	.	.	.	.	.	.	.	.	.	.	.	.	.	.	.	.	.
gene10462	mapkapk2.S	mapkapk2	LS	X	.	.	.	.	.	.	.	.	.	.	.	.	.	.	.	.	.	.	.	.	.	.	.	.
gene10463	cnnm4.S	cnnm4	LS	X	.	.	X	.	.	.	i	i	.	i	.	.	.	.	.	.	.	.	.	.	.	.	.	.
gene10464	vps4b.L	vps4b	LS	X	X	.	X	.	U	U	i	i	i	i	.	.	.	i	.	.	.	.	.	.	.	.	.	i
gene10465	XB5882685.L [provisional:cdca7]	XB5882685 [provisional:cdca7]	L	X	.	.	.	.	.	.	.	.	.	.	.	.	.	.	.	.	.	.	.	.	.	.	.	.
gene10466	elfn2.S	elfn2	LS	.	.	.	.	.	.	.	.	.	e	e	.	.	.	.	.	.	.	.	.	.	.	.	.	.
gene10467	tubb2b.S	tubb2b	LS	.	.	.	.	.	.	.	.	.	.	.	.	.	.	.	.	.	.	.	.	.	.	.	.	.
gene10468	chodl.S	chodl	LS	.	.	.	.	.	.	.	.	.	.	.	.	.	.	.	.	.	.	.	.	.	.	.	.	.
gene10469	slc32a1.L	slc32a1	LS	.	.	.	.	.	.	.	.	.	.	.	.	.	.	.	.	.	.	.	.	.	.	.	.	.
gene1047	tmem86a.L	tmem86a	L	X	.	.	.	.	.	.	.	.	.	.	.	.	.	.	.	.	.	.	.	.	.	.	.	.
gene10470	capn8.3.L	capn8.3	L	X	.	.	.	.	.	.	.	.	.	e	.	.	.	.	.	.	.	.	.	.	.	.	.	.
gene10471	.	.	.	.	.	.	.	.	.	.	.	.	.	.	.	.	.	.	.	.	.	.	.	.	.	.	.	.
gene10472	lmnb3.S	lmnb3	LS	X	.	.	.	.	.	.	.	.	.	.	.	.	.	.	.	.	.	.	.	.	.	.	.	.
gene10473	il1rap.S	il1rap	LS	.	.	.	.	.	.	.	.	.	e	.	.	.	.	.	.	.	.	.	.	.	.	.	.	.
gene10474	aanat.S	aanat	LS	.	.	.	.	.	.	.	.	.	.	.	.	.	.	.	.	.	.	.	.	.	.	.	.	.
gene10475	atad1.L	atad1	LS	X	.	.	.	.	.	.	.	.	.	.	.	.	.	.	.	.	.	.	.	.	.	.	.	.
gene10476	slc6a17.S	slc6a17	S	X	.	.	.	.	.	.	.	.	.	.	.	.	.	.	.	.	.	.	.	.	.	.	.	.
gene10477	trim36.L	trim36	LS	X	.	X	X	.	U	D	i	i	.	i	.	i	.	i	.	.	.	.	i	.	i	.	i	.
gene10478	ckap5.S	ckap5	LS	X	X	X	X	X	U	D	i	i	i	i	i	i	.	.	.	i	.	.	i	.	i	.	.	.
gene10479	.	.	.	.	.	.	.	.	.	.	.	.	.	.	.	.	.	.	.	.	.	.	.	.	.	.	.	.
gene1048	fbxl8.L	fbxl8	L	.	.	.	.	.	.	.	.	.	.	.	.	.	.	.	.	.	.	.	.	.	.	.	.	.
gene10480	lpin1.L	lpin1	LS	X	.	.	.	.	.	.	.	.	.	.	.	.	.	.	.	.	.	.	.	.	.	.	.	.
gene10481	ubxn4.S	ubxn4	LS	X	.	.	.	.	.	.	.	.	.	.	.	.	.	.	.	.	.	.	.	.	.	.	.	.
gene10482	thbs3.L	thbs3	LS	.	.	.	.	.	.	.	.	.	.	.	.	.	.	.	.	.	.	.	.	.	.	.	.	.
gene10483	lipg.S	lipg	LS	X	.	.	.	.	.	.	.	.	.	.	.	.	.	.	.	.	.	.	.	.	.	.	.	.
gene10484	depdc4.L	depdc4	L	X	.	.	.	.	.	.	.	.	e	.	.	.	.	.	.	.	.	.	.	.	.	.	.	.
gene10485	.	.	.	X	.	.	.	.	.	.	.	.	e	.	.	.	.	.	.	.	.	.	.	.	.	.	.	.
gene10486	smarcd3.S	smarcd3	S	X	.	.	.	X	U	.	.	.	.	.	i	.	.	i	.	i	.	i	.	.	.	.	.	.
gene10487	ugt1a6.S	ugt1a6	S	.	.	.	.	.	.	.	.	.	.	.	.	.	.	.	.	.	.	.	.	.	.	.	.	.
gene10488	.	.	.	.	.	.	.	.	.	.	.	.	.	e	.	.	.	.	.	.	.	.	.	.	.	.	.	.
gene10489	.	.	.	.	.	.	.	.	.	.	.	.	e	e	.	.	.	.	.	.	.	.	.	.	.	.	.	.
gene1049	rtn4rl1.L	rtn4rl1	LS	.	.	.	.	.	.	.	.	.	.	.	.	.	.	.	.	.	.	.	.	.	.	.	.	.
gene10490	.	.	.	X	X	X	X	.	U	D	i	i	i	i	.	i	.	i	.	.	.	i	i	.	i	.	.	.
gene10491	.	.	.	X	.	.	.	.	.	.	.	.	.	.	.	.	.	.	.	.	.	.	.	.	.	.	.	.
gene10492	sertad1.L	sertad1	LS	X	.	.	.	.	.	.	i	.	.	.	.	.	.	.	.	.	.	.	.	.	.	.	.	.
gene10493	pitpnc1.L	pitpnc1	LS	.	.	.	.	.	.	.	.	.	e	e	.	.	.	.	.	.	.	.	.	.	.	.	.	.
gene10494	cdca5.L	cdca5	LS	X	.	.	X	X	.	.	i	i	.	i	ei	.	.	.	.	.	.	.	.	.	.	.	.	.
gene10495	.	.	.	.	.	.	.	.	.	.	.	.	.	.	.	.	.	.	.	.	.	.	.	.	.	.	.	.
gene10496	ptpn1.L	ptpn1	LS	X	.	.	X	.	U	.	i	i	.	i	.	.	.	i	.	.	.	.	.	.	.	.	.	.
gene10497	capsl.L	capsl	LS	.	.	.	.	.	.	.	.	.	e	e	.	.	.	.	.	.	.	.	.	.	.	.	.	.
gene10498	ighcv.L	ighcv	L	.	.	.	.	.	.	.	.	.	.	.	.	.	.	.	.	.	.	.	.	.	.	.	.	.
gene10499	prlh.L	prlh	L	.	.	.	.	.	.	.	.	.	.	.	.	.	.	.	.	.	.	.	.	.	.	.	.	.
gene105	tmprss13.L	tmprss13	LS	.	.	.	.	.	.	.	.	.	.	.	.	.	.	.	.	.	.	.	.	.	.	.	.	.
gene1050	xcr1.L	xcr1	L	.	.	.	.	.	.	.	.	.	.	.	.	.	.	.	.	.	.	.	.	.	.	.	.	.
gene10500	ube2j2.L	ube2j2	LS	X	.	.	.	.	.	.	.	.	.	.	.	.	.	.	.	.	.	.	.	.	.	.	.	.
gene10501	hk1.L	hk1	L	X	.	.	.	X	.	.	.	.	.	.	e	.	.	.	.	.	.	.	.	.	.	.	.	.
gene10502	.	.	.	.	.	.	.	X	.	.	.	.	.	.	e	.	.	.	.	.	.	.	.	.	.	.	.	.
gene10503	.	.	.	.	.	.	.	.	.	.	.	.	.	e	.	.	.	.	.	.	.	.	.	.	.	.	.	.
gene10504	sik3.S	sik3	LS	X	.	.	.	.	.	.	.	.	.	.	.	.	.	.	.	.	.	.	.	.	.	.	.	.
gene10505	dmrta1.L	dmrta1	LS	.	.	.	.	.	.	.	.	.	.	.	.	.	.	.	.	.	.	.	.	.	.	.	.	.
gene10506	tmem254.S	tmem254	S	X	.	.	.	.	D	.	.	.	.	.	.	.	.	.	.	.	e	.	.	.	.	.	.	.
gene10507	fblim1.L	fblim1	LS	X	.	.	.	X	.	D	.	.	.	.	e	.	.	.	.	.	.	.	.	.	.	.	e	.
gene10508	lyl1.S	lyl1	S	.	.	.	.	.	.	.	.	.	.	.	.	.	.	.	.	.	.	.	.	.	.	.	.	.
gene10509	.	.	.	X	.	.	.	X	.	.	e	.	.	.	ei	.	.	.	.	.	.	.	.	.	.	.	.	.
gene1051	rpl37a.L	rpl37a	L	X	.	.	X	X	.	.	i	i	.	i	ei	.	.	.	.	.	.	.	.	.	.	.	.	.
gene10510	pdzd3.L	pdzd3	LS	.	.	.	.	.	.	.	.	.	.	.	.	.	.	.	.	.	.	.	.	.	.	.	.	.
gene10511	atl1.S	atl1	LS	X	.	.	.	.	.	.	.	.	.	.	.	.	.	.	.	.	.	.	.	.	.	.	.	.
gene10512	srrm3.L	srrm3	LS	.	.	.	.	.	.	.	.	.	.	.	.	.	.	.	.	.	.	.	.	.	.	.	.	.
gene10513	tjp2.L	tjp2	L	X	.	.	.	.	.	.	.	.	.	.	.	.	.	.	.	.	.	.	.	.	.	.	.	.
gene10514	zbtb45.L	zbtb45	LS	X	.	.	.	.	.	.	.	.	.	.	.	.	.	.	.	.	.	.	.	.	.	.	.	.
gene10515	foxd4l1.1.S	foxd4l1.1	LS	.	.	X	X	X	D	D	e	e	.	e	e	e	e	.	e	.	e	.	.	.	e	.	.	.
gene10516	prph2l.S	prph2l	LS	.	.	.	.	.	.	.	.	.	.	.	.	.	.	.	.	.	.	.	.	.	.	.	.	.
gene10517	map9.L	map9	L	X	.	.	.	X	.	.	.	.	.	.	e	.	.	.	.	.	.	.	.	.	.	.	.	.
gene10518	pcdh1.S	pcdh1	LS	X	.	.	.	.	.	.	.	.	.	.	.	.	.	.	.	.	.	.	.	.	.	.	.	.
gene10519	st3gal1.L	st3gal1	LS	.	.	.	.	X	.	D	.	.	e	e	e	.	.	.	.	.	.	.	.	.	.	.	e	.
gene1052	.	.	.	X	.	.	.	.	.	.	.	.	.	.	.	.	.	.	.	.	.	.	.	.	.	.	.	.
gene10520	lrrc4.L	lrrc4	LS	.	.	.	.	.	.	.	.	.	.	.	.	.	.	.	.	.	.	.	.	.	.	.	.	.
gene10521	bard1.L	bard1	L	X	.	.	X	.	U	.	i	i	.	i	.	.	.	.	.	i	.	i	.	.	.	.	.	.
gene10522	adamtsl5.S	adamtsl5	LS	.	.	.	.	.	.	.	.	.	.	.	.	.	.	.	.	.	.	.	.	.	.	.	.	.
gene10523	rabac1.S	rabac1	LS	X	.	.	.	.	.	.	.	.	.	.	.	.	.	.	.	.	.	.	.	.	.	.	.	.
gene10524	.	.	.	.	.	.	.	.	.	.	.	.	.	.	.	.	.	.	.	.	.	.	.	.	.	.	.	.
gene10525	sh3bgrl2.L	sh3bgrl2	LS	X	.	.	.	.	.	.	.	.	.	.	.	.	.	.	.	.	.	.	.	.	.	.	.	.
gene10526	gins1.S	gins1	S	X	.	.	.	.	D	.	.	.	.	.	.	e	.	.	.	.	e	.	.	.	.	.	.	.
gene10527	XB956055.L [provisional:stk35]	XB956055 [provisional:stk35]	L	X	.	X	X	.	U	.	i	i	.	i	.	i	.	.	.	.	.	i	.	.	.	.	.	.
gene10528	znf81.L	znf81	LS	X	.	.	.	.	.	.	.	.	.	.	.	.	.	.	.	.	.	.	.	.	.	.	.	.
gene10529	fbxw4.L	fbxw4	L	X	.	.	.	.	.	.	.	.	.	.	.	.	.	.	.	.	.	.	.	.	.	.	.	.
gene1053	abca3.L	abca3	LS	X	.	.	.	.	.	.	.	.	.	.	.	.	.	.	.	.	.	.	.	.	.	.	.	.
gene10530	mthfs.S	mthfs	LS	X	.	.	.	.	.	.	.	.	.	.	.	.	.	.	.	.	.	.	.	.	.	.	.	.
gene10531	usp7.S	usp7	LS	X	.	X	X	X	.	D	i	i	.	i	i	i	.	.	.	.	.	.	.	.	i	.	.	.
gene10532	relb.S	relb	LS	X	.	.	.	.	.	.	.	.	.	.	.	.	.	.	.	.	.	.	.	.	.	.	.	.
gene10533	pebp1.2.S	pebp1.2	LS	X	.	.	.	.	.	.	.	.	.	.	.	.	.	.	.	.	.	.	.	.	.	.	.	.
gene10534	clec11a.L	clec11a	L	.	.	.	.	.	.	.	.	.	.	.	.	.	.	.	.	.	.	.	.	.	.	.	.	.
gene10535	elovl1.S	elovl1	LS	X	.	.	.	.	.	.	.	.	.	.	.	.	.	.	.	.	.	.	.	.	.	.	.	.
gene10536	.	.	.	.	.	.	.	.	.	.	.	.	.	.	.	.	.	.	.	.	.	.	.	.	.	.	.	.
gene10537	.	.	.	.	.	.	.	.	.	.	.	.	.	.	.	.	.	.	.	.	.	.	.	.	.	.	.	.
gene10538	kctd8.L	kctd8	L	.	.	.	.	.	.	.	.	.	.	.	.	.	.	.	.	.	.	.	.	.	.	.	.	.
gene10539	pja2.L	pja2	LS	X	.	.	.	.	.	.	.	.	.	.	.	.	.	.	.	.	.	.	.	.	.	.	.	.
gene1054	.	.	.	X	.	.	.	.	.	.	.	.	.	.	.	.	.	.	.	.	.	.	.	.	.	.	.	.
gene10540	.	.	.	.	.	.	.	.	.	.	.	.	.	.	.	.	.	.	.	.	.	.	.	.	.	.	.	.
gene10541	cfap20.L	cfap20	LS	X	.	.	.	.	.	.	.	.	.	.	.	.	.	.	.	.	.	.	.	.	.	.	.	.
gene10542	.	.	.	.	.	.	.	.	.	.	.	.	.	.	.	.	.	.	.	.	.	.	.	.	.	.	.	.
gene10543	rrbp1.L	rrbp1	LS	X	X	X	X	.	D	D	i	i	i	i	.	i	.	.	i	.	i	.	.	.	i	.	.	.
gene10544	rhbdf1.L	rhbdf1	LS	.	.	.	.	.	.	.	.	.	.	.	.	.	.	.	.	.	.	.	.	.	.	.	.	.
gene10545	.	.	.	.	.	.	.	.	.	.	.	.	.	.	.	.	.	.	.	.	.	.	.	.	.	.	.	.
gene10546	macc1.L	macc1	LS	X	.	.	.	.	.	.	.	.	.	.	.	.	.	.	.	.	.	.	.	.	.	.	.	.
gene10547	ipo5.S	ipo5	LS	X	.	X	X	.	.	.	i	i	.	i	.	i	.	.	.	.	.	.	.	.	.	.	.	.
gene10548	.	.	.	.	.	.	.	.	.	.	.	.	.	.	.	.	.	.	.	.	.	.	.	.	.	.	.	.
gene10549	.	.	.	.	.	.	.	.	.	.	.	.	.	.	.	.	.	.	.	.	.	.	.	.	.	.	.	.
gene1055	XB5802829.L [provisional]	XB5802829 [provisional]	LS	.	.	.	.	.	.	.	.	.	.	.	.	.	.	.	.	.	.	.	.	.	.	.	.	.
gene10550	sav1.S	sav1	LS	X	.	.	.	.	.	.	.	.	.	.	.	.	.	.	.	.	.	.	.	.	.	.	.	.
gene10551	taf11.S	taf11	S	X	.	.	.	.	.	.	.	.	.	.	.	.	.	.	.	.	.	.	.	.	.	.	.	.
gene10552	crhr1.2.S	crhr1.2	LS	.	.	.	.	.	.	.	.	.	.	.	.	.	.	.	.	.	.	.	.	.	.	.	.	.
gene10553	lipe.S	lipe	LS	X	.	.	.	.	.	.	.	.	.	.	.	.	.	.	.	.	.	.	.	.	.	.	.	.
gene10554	upp2.S	upp2	LS	X	.	.	.	.	.	D	.	.	e	.	.	.	.	.	.	.	.	.	.	.	.	.	e	.
gene10555	XB5894820.L [provisional]	XB5894820 [provisional]	L	.	.	.	.	.	.	.	.	.	.	.	.	.	.	.	.	.	.	.	.	.	.	.	.	.
gene10556	ppfibp1.S	ppfibp1	S	X	.	.	.	.	.	.	.	.	.	.	.	.	.	.	.	.	.	.	.	.	.	.	.	.
gene10557	pacrgl.L	pacrgl	L	X	.	.	.	.	.	.	.	.	.	.	.	.	.	.	.	.	.	.	.	.	.	.	.	.
gene10558	smim22.S	smim22	LS	X	.	.	.	.	.	.	.	.	.	e	.	.	.	.	.	.	.	.	.	.	.	.	.	.
gene10559	znf652.L	znf652	LS	X	.	.	X	X	.	.	i	i	.	i	ei	.	.	.	.	.	.	.	.	.	.	.	.	.
gene1056	gjb5.L	gjb5	LS	.	.	.	.	.	.	.	.	.	e	.	.	.	.	.	.	.	.	.	.	.	.	.	.	.
gene10560	nat14.S	nat14	LS	X	.	.	.	.	.	.	.	.	.	.	.	.	.	.	.	.	.	.	.	.	.	.	.	.
gene10561	sephs3.L	sephs3	L	X	.	.	.	.	.	.	.	.	.	.	.	.	.	.	.	.	.	.	.	.	.	.	.	.
gene10562	nr1i3.L	nr1i3	LS	X	.	.	.	X	.	.	.	.	.	.	e	.	.	.	.	.	.	.	.	.	.	.	.	.
gene10563	dusp10.2.S	dusp10.2	LS	.	.	.	.	.	.	.	.	.	e	e	.	.	.	.	.	.	.	.	.	.	.	.	.	.
gene10564	.	.	.	.	.	.	.	.	.	.	.	.	.	.	.	.	.	.	.	.	.	.	.	.	.	.	.	.
gene10565	ttc34.L	ttc34	LS	X	.	.	.	X	.	.	.	.	.	.	e	.	.	.	.	.	.	.	.	.	.	.	.	.
gene10566	rap1a.S	rap1a	LS	X	.	.	.	.	.	.	.	.	.	.	.	.	.	.	.	.	.	.	.	.	.	.	.	.
gene10567	rplp2.S	rplp2	LS	X	.	.	.	.	.	.	.	.	.	.	.	.	.	.	.	.	.	.	.	.	.	.	.	.
gene10568	angptl4.S	angptl4	LS	.	.	.	.	.	.	.	.	.	.	.	.	.	.	.	.	.	.	.	.	.	.	.	.	.
gene10569	mcrs1.S	mcrs1	LS	X	.	.	X	X	.	.	i	i	.	i	ei	.	.	.	.	.	.	.	.	.	.	.	.	.
gene1057	ouro1.L	ouro1	LS	.	.	.	.	.	.	.	.	.	.	.	.	.	.	.	.	.	.	.	.	.	.	.	.	.
gene10570	xpot.S	xpot	LS	X	.	.	.	.	.	.	.	.	.	.	.	.	.	.	.	.	.	.	.	.	.	.	.	.
gene10571	gtf3a.L	gtf3a	L	X	.	.	.	.	.	.	i	.	.	.	.	.	.	.	.	.	.	.	.	.	.	.	.	.
gene10572	pkn2.S	pkn2	LS	X	.	.	X	X	.	.	i	i	.	i	i	.	.	.	.	.	.	.	.	.	.	.	.	.
gene10573	mars1.S	mars1	LS	X	.	.	.	.	.	.	.	.	.	.	.	.	.	.	.	.	.	.	.	.	.	.	.	.
gene10574	cope.L	cope	LS	X	.	.	.	.	.	.	.	.	.	.	.	.	.	.	.	.	.	.	.	.	.	.	.	.
gene10575	trim33.L	trim33	LS	X	.	.	.	.	.	.	.	.	.	.	.	.	.	.	.	.	.	.	.	.	.	.	.	.
gene10576	tpk1.L	tpk1	L	X	.	.	.	.	.	.	.	.	.	.	.	.	.	.	.	.	.	.	.	.	.	.	.	.
gene10577	hps5.L	hps5	L	X	.	.	.	.	.	.	.	.	.	.	.	.	.	.	.	.	.	.	.	.	.	.	.	.
gene10578	immt.L	immt	LS	X	.	.	.	.	.	.	.	.	.	.	.	.	.	.	.	.	.	.	.	.	.	.	.	.
gene10579	agr2.L	agr2	LS	.	.	.	.	.	.	.	.	.	.	.	.	.	.	.	.	.	.	.	.	.	.	.	.	.
gene1058	aff4.S	aff4	LS	X	.	.	.	.	.	.	.	.	.	.	.	.	.	.	.	.	.	.	.	.	.	.	.	.
gene10580	.	.	.	X	.	.	.	X	.	.	i	.	e	.	e	.	.	.	.	.	.	.	.	.	.	.	.	.
gene10581	.	.	.	.	.	.	.	X	.	.	.	.	.	.	e	.	.	.	.	.	.	.	.	.	.	.	.	.
gene10582	ctrc.L	ctrc	L	.	.	.	.	.	.	.	.	.	.	.	.	.	.	.	.	.	.	.	.	.	.	.	.	.
gene10583	ska2.S	ska2	LS	X	.	.	.	.	.	.	.	.	.	.	.	.	.	.	.	.	.	.	.	.	.	.	.	.
gene10584	.	.	.	X	.	.	.	X	.	.	.	.	.	.	e	.	.	.	.	.	.	.	.	.	.	.	.	.
gene10585	p2ry11.L	p2ry11	LS	.	.	.	.	.	.	.	.	.	.	.	.	.	.	.	.	.	.	.	.	.	.	.	.	.
gene10586	.	.	.	X	.	.	.	.	.	.	.	.	.	.	.	.	.	.	.	.	.	.	.	.	.	.	.	.
gene10587	.	.	.	.	.	.	.	.	.	.	.	.	.	.	.	.	.	.	.	.	.	.	.	.	.	.	.	.
gene10588	irak2.L	irak2	L	.	.	.	.	X	.	D	.	.	.	.	e	.	.	.	.	.	.	.	.	.	.	.	e	.
gene10589	gcg.L	gcg	L	.	.	.	.	.	.	.	.	.	.	.	.	.	.	.	.	.	.	.	.	.	.	.	.	.
gene1059	.	.	.	.	.	.	.	.	.	.	.	.	.	.	.	.	.	.	.	.	.	.	.	.	.	.	.	.
gene10590	fabp3.S	fabp3	LS	.	.	.	.	.	.	.	.	.	.	.	.	.	.	.	.	.	.	.	.	.	.	.	.	.
gene10591	slc26a2.L	slc26a2	LS	.	.	.	.	.	.	.	.	.	.	.	.	.	.	.	.	.	.	.	.	.	.	.	.	.
gene10592	fech.S	fech	LS	X	.	.	.	.	.	D	.	.	.	.	.	.	.	.	.	.	.	.	.	.	.	.	e	.
gene10593	zdhhc7.L	zdhhc7	LS	X	.	.	.	.	.	.	.	.	.	.	.	.	.	.	.	.	.	.	.	.	.	.	.	.
gene10594	med22.L	med22	LS	X	.	.	.	X	.	.	.	i	.	i	i	.	.	.	.	.	.	.	.	.	.	.	.	.
gene10595	.	.	.	.	.	.	.	.	.	D	.	.	.	.	.	.	.	.	.	.	.	.	.	.	.	.	e	.
gene10596	.	.	.	.	.	.	.	.	.	.	.	.	.	.	.	.	.	.	.	.	.	.	.	.	.	.	.	.
gene10597	pram1.S	pram1	LS	.	.	.	.	.	.	.	.	.	.	.	.	.	.	.	.	.	.	.	.	.	.	.	.	.
gene10598	gngt2.1.S	gngt2.1	LS	.	.	.	.	.	.	.	.	.	.	.	.	.	.	.	.	.	.	.	.	.	.	.	.	.
gene10599	slc45a3.L	slc45a3	L	X	.	.	.	.	.	.	.	.	e	.	.	.	.	.	.	.	.	.	.	.	.	.	.	.
gene106	rpa3.L	rpa3	LS	X	.	.	.	.	.	.	i	.	i	i	.	.	.	.	.	.	.	.	.	.	.	.	.	.
gene1060	.	.	.	.	.	.	.	.	.	.	.	.	.	.	.	.	.	.	.	.	.	.	.	.	.	.	.	.
gene10600	znf821.S	znf821	LS	X	.	.	.	.	.	.	.	.	.	.	.	.	.	.	.	.	.	.	.	.	.	.	.	.
gene10601	.	.	.	.	.	.	.	.	.	.	.	.	.	.	.	.	.	.	.	.	.	.	.	.	.	.	.	.
gene10602	.	.	.	X	.	.	.	.	.	.	.	.	.	.	.	.	.	.	.	.	.	.	.	.	.	.	.	.
gene10603	zfhx4.L	zfhx4	LS	X	.	.	.	X	.	D	.	.	.	.	e	e	.	.	.	.	.	.	.	.	.	.	e	.
gene10604	diras2.L	diras2	LS	.	.	.	.	.	.	.	.	.	.	.	.	.	.	.	.	.	.	.	.	.	.	.	.	.
gene10605	fam210b.L	fam210b	LS	X	.	.	.	.	.	.	.	.	.	.	.	.	.	.	.	.	.	.	.	.	.	.	.	.
gene10606	tmem11.L	tmem11	LS	X	.	.	.	.	.	.	.	.	.	.	.	.	.	.	.	.	.	.	.	.	.	.	.	.
gene10607	kdm8.L	kdm8	L	X	.	.	.	.	.	.	.	.	.	.	.	.	.	.	.	.	.	.	.	.	.	.	.	.
gene10608	cdk11b.L	cdk11b	LS	X	.	.	.	.	.	.	.	.	.	.	.	.	.	.	.	.	.	.	.	.	.	.	.	.
gene10609	gpx7.L	gpx7	LS	.	.	.	.	.	.	.	.	.	.	.	.	.	.	.	.	.	.	.	.	.	.	.	.	.
gene1061	acsf3.L	acsf3	LS	X	.	.	.	.	.	.	.	.	.	.	.	.	.	.	.	.	.	.	.	.	.	.	.	.
gene10610	.	.	.	X	.	.	.	.	.	U	.	.	.	e	.	.	.	.	.	.	.	.	.	.	.	.	.	e
gene10611	six2.L	six2	LS	.	.	.	.	.	.	.	.	.	.	.	.	.	.	.	.	.	.	.	.	.	.	.	.	.
gene10612	.	.	.	X	.	.	.	.	.	D	.	.	.	.	.	.	.	.	.	.	.	.	.	.	.	.	e	.
gene10613	vamp7.S	vamp7	LS	X	.	.	.	.	.	.	.	.	.	.	.	.	.	.	.	.	.	.	.	.	.	.	.	.
gene10614	.	.	.	.	.	.	.	.	.	.	.	.	.	.	.	.	.	.	.	.	.	.	.	.	.	.	.	.
gene10615	aipl1.L	aipl1	LS	.	.	.	.	.	.	.	.	.	.	.	.	.	.	.	.	.	.	.	.	.	.	.	.	.
gene10616	fam151a.S	fam151a	LS	.	.	.	.	.	.	.	.	.	.	.	.	.	.	.	.	.	.	.	.	.	.	.	.	.
gene10617	wbp11.L	wbp11	LS	X	.	.	.	X	.	.	.	.	.	.	e	.	.	.	.	.	.	.	.	.	.	.	.	.
gene10618	rusf1.S	rusf1	LS	X	.	.	.	.	.	.	.	.	.	.	.	.	.	.	.	.	.	.	.	.	.	.	.	.
gene10619	.	.	.	.	.	.	.	.	.	D	.	.	.	.	.	.	.	.	.	.	.	.	.	.	.	.	e	.
gene1062	fignl1.L	fignl1	L	X	.	.	.	.	.	.	.	.	.	.	.	.	.	.	.	.	.	.	.	.	.	.	.	.
gene10620	znf326.S	znf326	LS	X	.	X	X	X	U	D	i	i	.	i	ei	i	.	i	.	.	.	.	.	.	i	.	.	.
gene10621	.	.	.	X	.	.	.	X	.	.	.	.	.	.	e	.	.	.	.	.	.	.	.	.	.	.	.	.
gene10622	lhx6.L	lhx6	LS	.	.	.	.	.	.	.	.	.	.	.	.	.	.	.	.	.	.	.	.	.	.	.	.	.
gene10623	.	.	.	.	.	.	.	.	.	.	.	.	.	.	.	.	.	.	.	.	.	.	.	.	.	.	.	.
gene10624	mad1l1.L	mad1l1	L	X	.	.	.	.	.	.	.	.	.	.	.	.	.	.	.	.	.	.	.	.	.	.	.	.
gene10625	senp7.L	senp7	L	X	.	.	X	X	U	.	i	i	.	i	i	.	.	i	.	i	.	i	.	.	.	.	.	.
gene10626	plod1.L	plod1	LS	X	.	.	.	X	.	U	.	.	.	.	e	.	.	.	.	.	.	.	.	.	.	.	.	e
gene10627	rufy3.L	rufy3	LS	X	.	.	.	.	.	.	.	.	.	.	.	.	.	.	.	.	.	.	.	.	.	.	.	.
gene10628	igsf9.L	igsf9	LS	X	.	.	.	.	.	.	.	.	.	.	.	.	.	.	.	.	.	.	.	.	.	.	.	.
gene10629	rps9.L	rps9	LS	X	.	.	.	X	.	.	.	.	.	.	e	.	.	.	.	.	.	.	.	.	.	.	.	.
gene1063	.	.	.	.	.	.	.	.	.	.	.	.	.	.	.	.	.	.	.	.	.	.	.	.	.	.	.	.
gene10630	bend3.L	bend3	LS	X	.	.	X	X	.	D	i	i	.	i	ei	.	.	.	.	.	.	.	.	.	.	.	e	.
gene10631	maea.S	maea	LS	X	.	.	.	.	.	.	.	.	.	.	.	.	.	.	.	.	.	.	.	.	.	.	.	.
gene10632	cct4.L	cct4	LS	X	.	.	.	.	.	.	.	.	.	.	.	.	.	.	.	.	.	.	.	.	.	.	.	.
gene10633	hspa5.S	hspa5	LS	X	.	.	X	X	U	.	i	i	.	i	i	.	.	i	.	.	.	.	.	.	.	.	.	.
gene10634	kcmf1.L	kcmf1	L	X	.	.	.	.	.	.	.	.	.	.	.	.	.	.	.	.	.	.	.	.	.	.	.	.
gene10635	hspbp1.L	hspbp1	L	X	.	X	X	X	.	.	i	i	.	i	ei	e	.	.	.	.	.	.	.	.	.	.	.	.
gene10636	prelid3b.S	prelid3b	LS	X	.	.	.	X	.	.	.	.	.	.	e	.	.	.	.	.	.	.	.	.	.	.	.	.
gene10637	aqp1.S	aqp1	LS	.	.	.	.	.	.	.	.	.	.	.	.	.	.	.	.	.	.	.	.	.	.	.	.	.
gene10638	ezh2.S	ezh2	LS	X	.	.	.	.	.	.	.	.	.	.	.	.	.	.	.	.	.	.	.	.	.	.	.	.
gene10639	vipr2.S	vipr2	LS	.	.	.	.	.	.	.	.	.	.	.	.	.	.	.	.	.	.	.	.	.	.	.	.	.
gene1064	.	.	.	X	.	.	.	.	.	.	.	.	.	.	.	.	.	.	.	.	.	.	.	.	.	.	.	.
gene10640	rdh11.S	rdh11	S	.	.	.	.	.	.	.	.	.	.	.	.	.	.	.	.	.	.	.	.	.	.	.	.	.
gene10641	znf330.L	znf330	LS	X	.	.	.	.	.	.	.	.	.	.	.	.	.	.	.	.	.	.	.	.	.	.	.	.
gene10642	rgs10.L	rgs10	LS	.	.	.	.	.	.	.	.	.	.	.	.	.	.	.	.	.	.	.	.	.	.	.	.	.
gene10643	ehhadh.S	ehhadh	S	X	.	.	.	.	.	.	.	.	.	.	.	.	.	.	.	.	.	.	.	.	.	.	.	.
gene10644	lgals3.L	lgals3	LS	X	.	.	.	X	U	D	i	.	.	i	i	i	.	i	.	i	.	i	i	.	.	.	.	.
gene10645	pip4k2c.L	pip4k2c	LS	X	.	.	.	.	.	.	.	.	.	.	.	.	.	.	.	.	.	.	.	.	.	.	.	.
gene10646	brox.S	brox	LS	X	.	.	.	.	.	.	.	.	.	.	.	.	.	.	.	.	.	.	.	.	.	.	.	.
gene10647	thyn1.L	thyn1	L	X	.	.	.	.	.	.	.	.	.	.	.	.	.	.	.	.	.	.	.	.	.	.	.	.
gene10648	p2ry1.S	p2ry1	LS	.	.	.	.	.	.	.	.	.	.	.	.	.	.	.	.	.	.	.	.	.	.	.	.	.
gene10649	.	.	.	X	.	.	.	X	.	.	.	.	.	.	e	.	.	.	.	.	.	.	.	.	.	.	.	.
gene1065	eya1.S	eya1	LS	.	.	.	.	X	.	U	.	.	.	e	e	.	.	.	.	.	.	.	.	.	.	.	.	e
gene10650	art1.L	art1	LS	.	.	.	.	.	.	.	.	.	.	.	.	.	.	.	.	.	.	.	.	.	.	.	.	.
gene10651	.	.	.	X	.	.	.	X	.	.	.	.	.	.	e	.	.	.	.	.	.	.	.	.	.	.	.	.
gene10652	.	.	.	X	.	.	.	X	.	.	.	.	.	.	e	.	.	.	.	.	.	.	.	.	.	.	.	.
gene10653	vat1l.L	vat1l	LS	.	.	.	.	.	.	.	.	.	.	.	.	.	.	.	.	.	.	.	.	.	.	.	.	.
gene10654	sorbs3.L	sorbs3	L	X	.	.	.	.	.	.	.	.	.	.	.	.	.	.	.	.	.	.	.	.	.	.	.	.
gene10655	tgfa.S	tgfa	LS	.	.	.	.	.	.	.	.	.	.	.	.	.	.	.	.	.	.	.	.	.	.	.	.	.
gene10656	sntg1.L	sntg1	LS	X	.	.	.	.	.	.	.	.	.	.	.	.	.	.	.	.	.	.	.	.	.	.	.	.
gene10657	ap4s1.L	ap4s1	L	X	.	.	.	X	.	.	i	.	.	i	i	.	.	.	.	.	.	.	.	.	.	.	.	.
gene10658	laptm4b.L	laptm4b	LS	.	.	.	.	.	.	.	.	.	.	.	.	.	.	.	.	.	.	.	.	.	.	.	.	.
gene10659	.	.	.	X	.	.	.	.	.	.	.	.	.	.	.	.	.	.	.	.	.	.	.	.	.	.	.	.
gene1066	.	.	.	.	.	.	.	.	.	.	.	.	.	.	.	.	.	.	.	.	.	.	.	.	.	.	.	.
gene10660	mthfd1.L	mthfd1	L	X	.	.	X	X	.	.	i	i	.	i	i	.	.	.	.	.	.	.	.	.	.	.	.	.
gene10661	ctla4.L	ctla4	LS	.	.	.	.	.	.	.	.	.	.	.	.	.	.	.	.	.	.	.	.	.	.	.	.	.
gene10662	ppp4c.L	ppp4c	LS	X	.	.	.	X	.	.	i	.	.	i	i	.	.	.	.	.	.	.	.	.	.	.	.	.
gene10663	ppme1.S	ppme1	S	X	.	.	.	.	.	.	.	.	.	.	.	.	.	.	.	.	.	.	.	.	.	.	.	.
gene10664	etnppl.L	etnppl	L	.	.	.	.	.	.	.	.	.	.	.	.	.	.	.	.	.	.	.	.	.	.	.	.	.
gene10665	peli2.L	peli2	LS	X	X	X	X	X	U	.	i	i	i	i	ei	i	.	i	.	i	.	i	.	.	.	.	.	.
gene10666	znf507.L	znf507	LS	X	.	.	.	.	.	.	.	.	.	.	.	.	.	.	.	.	.	.	.	.	.	.	.	.
gene10667	cbfa2t3.S	cbfa2t3	LS	X	.	.	.	X	.	D	.	.	e	.	e	.	.	.	.	.	.	.	.	.	.	.	e	.
gene10668	.	.	.	X	.	.	.	.	.	D	.	.	.	.	.	.	.	.	.	.	.	.	.	.	.	.	e	.
gene10669	rwdd2a.L	rwdd2a	L	X	.	.	.	.	.	.	.	.	.	.	.	.	.	.	.	.	.	.	.	.	.	.	.	.
gene1067	dok6.S	dok6	LS	.	.	.	.	.	.	.	.	.	.	.	.	.	.	.	.	.	.	.	.	.	.	.	.	.
gene10670	dnajc18.S	dnajc18	S	.	.	.	.	.	.	.	.	.	.	.	.	.	.	.	.	.	.	.	.	.	.	.	.	.
gene10671	brap.S	brap	LS	X	.	.	.	.	.	.	.	.	.	.	.	.	.	.	.	.	.	.	.	.	.	.	.	.
gene10672	numa1.L	numa1	LS	X	X	X	X	.	U	.	i	i	i	i	.	i	.	i	.	i	.	i	.	.	.	.	.	.
gene10673	cryl1.L	cryl1	LS	X	.	.	.	.	U	D	.	.	.	.	.	.	.	.	.	.	.	.	.	.	.	.	e	.
gene10674	ccdc149.S	ccdc149	LS	X	.	.	.	.	.	.	.	.	.	.	.	.	.	.	.	.	.	.	.	.	.	.	.	.
gene10675	mrpl18.L	mrpl18	L	X	.	.	.	.	.	.	.	.	.	.	.	.	.	.	.	.	.	.	.	.	.	.	.	.
gene10676	slco4c1.L	slco4c1	LS	.	.	.	.	.	.	.	.	.	.	.	.	.	.	.	.	.	.	.	.	.	.	.	.	.
gene10677	exoc6b.L	exoc6b	LS	X	.	.	.	.	.	.	.	.	.	.	.	.	.	.	.	.	.	.	.	.	.	.	.	.
gene10678	lbx1.L	lbx1	LS	.	.	.	.	.	.	.	.	.	.	.	.	.	.	.	.	.	.	.	.	.	.	.	.	.
gene10679	gstk1.L	gstk1	LS	X	.	.	.	.	.	.	.	.	.	.	.	.	.	.	.	.	.	.	.	.	.	.	.	.
gene1068	slc16a9.L	slc16a9	LS	.	.	.	.	.	.	.	.	.	.	.	.	.	.	.	.	.	.	.	.	.	.	.	.	.
gene10680	acat2.L	acat2	LS	X	.	.	.	.	.	.	.	.	.	.	.	.	.	.	.	.	.	.	.	.	.	.	.	.
gene10681	h2az1.L	h2az1	LS	X	.	X	X	X	U	D	i	i	.	i	e	i	.	i	.	i	.	i	.	.	i	.	.	.
gene10682	mib2.S	mib2	LS	X	.	.	.	.	.	.	.	.	.	e	.	.	.	.	.	.	.	.	.	.	.	.	.	.
gene10683	napa.L	napa	L	X	.	.	.	.	.	.	.	.	.	.	.	.	.	.	.	.	.	.	.	.	.	.	.	.
gene10684	zfand6.L	zfand6	LS	X	X	.	X	.	U	.	i	i	i	i	.	.	.	.	.	i	.	i	.	.	.	.	.	.
gene10685	ing1.S	ing1	LS	X	.	X	X	.	.	D	i	i	.	i	.	i	.	.	.	.	.	.	.	.	.	.	i	.
gene10686	vapb.S	vapb	S	X	X	X	X	X	.	D	i	i	ei	i	ei	i	.	.	.	.	.	.	.	.	i	.	.	.
gene10687	tmcc1.S	tmcc1	LS	X	.	X	X	X	U	D	i	i	.	i	ei	i	.	.	.	i	.	i	i	.	i	.	i	.
gene10688	ndrg1.S	ndrg1	LS	.	.	.	.	.	.	.	.	.	.	.	.	.	.	.	.	.	.	.	.	.	.	.	.	.
gene10689	tex261.S	tex261	LS	X	.	.	.	.	.	.	.	.	.	.	.	.	.	.	.	.	.	.	.	.	.	.	.	.
gene1069	.	.	.	X	.	.	.	X	.	D	.	.	.	.	e	.	.	.	.	.	.	.	.	.	.	.	e	.
gene10690	usp28.L	usp28	L	X	.	.	.	.	D	.	.	.	.	.	.	.	.	.	.	.	e	.	.	.	.	.	.	.
gene10691	lrp3.L	lrp3	LS	X	.	.	.	.	.	.	.	.	.	.	.	.	.	.	.	.	.	.	.	.	.	.	.	.
gene10692	safb.S	safb	LS	X	.	.	X	X	U	D	i	i	.	i	ei	.	.	i	.	.	.	.	.	.	i	.	.	.
gene10693	slc22a7.L	slc22a7	L	.	.	.	.	.	.	.	.	.	.	.	.	.	.	.	.	.	.	.	.	.	.	.	.	.
gene10694	iah1.L	iah1	L	X	.	.	.	X	.	.	.	.	.	.	e	.	.	.	.	.	.	.	.	.	.	.	.	.
gene10695	.	.	.	.	.	.	.	.	.	.	.	.	.	.	.	.	.	.	.	.	.	.	.	.	.	.	.	.
gene10696	.	.	.	.	.	.	.	.	.	.	.	.	.	.	.	.	.	.	.	.	.	.	.	.	.	.	.	.
gene10697	.	.	.	.	.	.	.	X	.	.	.	e	.	.	e	.	.	.	.	.	.	.	.	.	.	.	.	.
gene10698	pcnp.S	pcnp	LS	X	.	.	.	.	.	.	.	.	e	e	.	.	.	.	.	.	.	.	.	.	.	.	.	.
gene10699	.	.	.	.	.	.	.	.	.	.	.	.	.	.	.	.	.	.	.	.	.	.	.	.	.	.	.	.
gene107	.	.	.	.	.	.	.	.	.	.	.	.	.	.	.	.	.	.	.	.	.	.	.	.	.	.	.	.
gene1070	prph2.S	prph2	LS	.	.	.	.	.	.	U	.	.	.	.	.	.	.	.	.	.	.	.	.	.	.	.	.	e
gene10700	.	.	.	.	.	.	.	.	.	.	.	.	.	.	.	.	.	.	.	.	.	.	.	.	.	.	.	.
gene10701	suv39h1.L	suv39h1	LS	X	.	.	.	.	.	.	.	.	.	.	.	.	.	.	.	.	.	.	.	.	.	.	.	.
gene10702	.	.	.	.	.	.	.	.	.	.	.	.	.	.	.	.	.	.	.	.	.	.	.	.	.	.	.	.
gene10703	rala.L	rala	L	X	.	.	.	.	.	.	.	.	.	.	.	.	.	.	.	.	.	.	.	.	.	.	.	.
gene10704	rab18.L	rab18	LS	X	.	.	.	X	.	.	.	.	.	.	e	.	.	.	.	.	.	.	.	.	.	.	.	.
gene10705	parp6.S	parp6	LS	.	.	.	.	.	.	.	.	.	.	.	.	.	.	.	.	.	.	.	.	.	.	.	.	.
gene10706	cebpb.S	cebpb	LS	X	.	.	.	.	.	D	e	e	e	.	.	.	.	.	.	.	.	.	.	.	.	.	e	.
gene10707	slc35a3.1.L	slc35a3.1	L	.	.	.	.	.	.	.	.	.	.	.	.	.	.	.	.	.	.	.	.	.	.	.	.	.
gene10708	naca.L	naca	LS	X	.	.	X	X	.	.	i	i	.	i	i	.	.	.	.	.	.	.	.	.	.	.	.	.
gene10709	idh3a.S	idh3a	LS	X	X	.	X	.	.	.	i	i	i	i	.	.	.	.	.	.	.	.	.	.	.	.	.	.
gene1071	XB5902317.L [provisional:ces1c]	XB5902317 [provisional:ces1c]	L	.	.	.	.	.	.	.	.	.	.	.	.	.	.	.	.	.	.	.	.	.	.	.	.	.
gene10710	nudt21.L	nudt21	L	X	.	.	X	X	.	.	i	i	.	i	i	.	.	.	.	.	.	.	.	.	.	.	.	.
gene10711	polr2g.L	polr2g	L	X	.	X	X	.	D	.	i	i	.	i	.	i	.	.	.	.	i	.	.	.	.	.	.	.
gene10712	vcp.S	vcp	LS	X	.	.	.	.	U	.	i	.	i	i	.	i	.	i	.	.	.	.	.	.	.	.	.	.
gene10713	.	.	.	.	.	.	.	.	.	.	.	.	.	.	.	.	.	.	.	.	.	.	.	.	.	.	.	.
gene10714	wwp1.L	wwp1	LS	X	.	.	.	.	.	D	.	.	.	.	.	.	.	.	.	.	.	.	.	.	.	.	e	.
gene10715	itfg2.L	itfg2	L	X	.	.	.	.	.	.	.	.	.	.	.	.	.	.	.	.	.	.	.	.	.	.	.	.
gene10716	.	.	.	X	.	.	.	.	.	.	.	.	.	.	.	.	.	.	.	.	.	.	.	.	.	.	.	.
gene10717	socs4.S	socs4	LS	.	.	.	.	.	.	.	.	.	e	e	.	.	.	.	.	.	.	.	.	.	.	.	.	.
gene10718	eif4enif1.S	eif4enif1	LS	X	.	.	X	.	.	.	i	i	.	i	.	.	.	.	.	.	.	.	.	.	.	.	.	.
gene10719	.	.	.	.	.	.	.	.	.	D	.	.	e	.	.	ei	.	.	.	.	.	.	.	.	.	.	i	.
gene1072	dsn1.L	dsn1	L	X	.	.	.	.	.	.	.	.	.	.	.	.	.	.	.	.	.	.	.	.	.	.	.	.
gene10720	apoc1.L	apoc1	L	.	.	.	.	X	.	.	.	.	.	.	e	.	.	.	.	.	.	.	.	.	.	.	.	.
gene10721	mrps12.S	mrps12	LS	X	.	.	.	.	.	.	.	.	.	.	.	.	.	.	.	.	.	.	.	.	.	.	.	.
gene10722	fnip2.S	fnip2	LS	X	.	.	.	.	.	.	.	.	.	.	.	.	.	.	.	.	.	.	.	.	.	.	.	.
gene10723	c1qbp.L	c1qbp	LS	X	.	.	.	.	.	.	.	.	.	.	.	.	.	.	.	.	.	.	.	.	.	.	.	.
gene10724	phf3.L	phf3	LS	X	.	.	X	.	.	.	i	i	.	i	.	.	.	.	.	.	.	.	.	.	.	.	.	.
gene10725	pou3f4.S	pou3f4	LS	.	.	.	.	.	.	.	.	.	.	.	.	.	.	.	.	.	.	.	.	.	.	.	.	.
gene10726	mxd3.L	mxd3	LS	X	.	.	.	.	.	.	.	.	.	i	.	.	.	.	.	.	.	.	.	.	.	.	.	.
gene10727	.	.	.	.	.	.	.	.	.	.	.	.	.	.	.	.	.	.	.	.	.	.	.	.	.	.	.	.
gene10728	opn6a.L	opn6a	LS	.	.	.	.	.	.	.	.	.	.	.	.	.	.	.	.	.	.	.	.	.	.	.	.	.
gene10729	sh3rf1.S	sh3rf1	LS	X	.	.	.	.	.	.	.	.	.	.	.	.	.	.	.	.	.	.	.	.	.	.	.	.
gene1073	ppp3r1.S	ppp3r1	LS	X	.	.	.	.	.	.	.	.	.	.	.	.	.	.	.	.	.	.	.	.	.	.	.	.
gene10730	rspry1.L	rspry1	LS	X	.	.	.	.	.	.	.	.	.	.	.	.	.	.	.	.	.	.	.	.	.	.	.	.
gene10731	glcci1.S	glcci1	LS	X	.	.	.	.	.	.	.	.	.	.	.	.	.	.	.	.	.	.	.	.	.	.	.	.
gene10732	il1b.L	il1b	LS	.	.	.	.	.	.	.	.	.	.	.	.	.	.	.	.	.	.	.	.	.	.	.	.	.
gene10733	fam3b.S	fam3b	LS	.	.	.	.	.	.	.	.	.	.	.	.	.	.	.	.	.	.	.	.	.	.	.	.	.
gene10734	epas1.S	epas1	LS	.	.	.	.	X	.	.	.	e	.	e	e	.	.	.	.	.	.	.	.	.	.	.	.	.
gene10735	setbp1.L	setbp1	LS	X	.	.	.	X	.	.	.	.	.	.	e	.	.	.	.	.	.	.	.	.	.	.	.	.
gene10736	klf11.L	klf11	LS	X	.	X	X	X	U	D	i	i	.	i	e	i	.	i	.	.	.	.	.	.	i	.	i	.
gene10737	.	.	.	.	.	.	.	.	.	.	.	.	.	.	.	.	.	.	.	.	.	.	.	.	.	.	.	.
gene10738	ttc33.L	ttc33	L	X	.	.	.	.	.	.	.	.	.	.	.	.	.	.	.	.	.	.	.	.	.	.	.	.
gene10739	txlna.L	txlna	LS	X	X	.	X	.	U	.	i	i	i	i	.	.	.	i	.	i	.	i	.	.	.	.	.	.
gene1074	oit3.L	oit3	LS	X	.	.	.	X	.	.	.	.	.	.	e	.	.	.	.	.	.	.	.	.	.	.	.	.
gene10740	.	.	.	.	.	.	.	.	.	.	.	.	.	e	.	.	.	.	.	.	.	.	.	.	.	.	.	.
gene10741	htra2.S	htra2	S	X	.	.	.	.	.	.	i	.	.	i	.	.	.	.	.	.	.	.	.	.	.	.	.	.
gene10742	rnf38.L	rnf38	LS	X	X	X	X	X	U	D	i	i	i	i	ei	i	.	i	.	i	.	i	.	.	i	.	.	.
gene10743	.	.	.	X	.	.	.	.	.	.	.	.	.	.	.	.	.	.	.	.	.	.	.	.	.	.	.	.
gene10744	.	.	.	X	.	.	.	.	.	.	.	.	.	.	.	.	.	.	.	.	.	.	.	.	.	.	.	.
gene10745	perp.S	perp	S	X	.	.	.	X	U	D	.	i	.	i	i	i	.	i	.	i	.	i	.	.	i	.	i	.
gene10746	.	.	.	.	.	.	.	.	.	.	.	.	.	.	.	.	.	.	.	.	.	.	.	.	.	.	.	.
gene10747	gns.L	gns	LS	X	.	.	.	.	.	.	.	.	.	.	.	.	.	.	.	.	.	.	.	.	.	.	.	.
gene10748	slc36a1.S	slc36a1	LS	X	.	.	.	.	.	.	.	.	.	.	.	.	.	.	.	.	.	.	.	.	.	.	.	.
gene10749	fgfr4.S	fgfr4	LS	X	.	X	X	X	D	D	i	i	.	i	ei	i	i	.	i	.	i	.	i	.	i	.	i	.
gene1075	cop1.S	cop1	LS	X	.	.	.	.	.	.	.	.	.	.	.	.	.	.	.	.	.	.	.	.	.	.	.	.
gene10750	tmed10.S	tmed10	LS	X	.	.	X	X	.	.	i	i	.	i	i	.	.	.	.	.	.	.	.	.	.	.	.	.
gene10751	.	.	.	.	.	.	.	.	.	.	.	.	.	.	.	e	.	.	.	.	.	.	.	.	.	.	.	.
gene10752	mitf.S	mitf	LS	.	.	.	.	.	.	.	.	.	e	.	.	.	.	.	.	.	.	.	.	.	.	.	.	.
gene10753	.	.	.	.	.	.	.	.	.	.	.	.	.	.	.	.	.	.	.	.	.	.	.	.	.	.	.	.
gene10754	wipi2.L	wipi2	L	X	.	.	X	.	U	.	i	i	.	i	.	.	.	i	.	.	.	.	.	.	.	.	.	.
gene10755	cul5.L	cul5	LS	X	.	.	.	.	.	.	.	.	.	.	.	.	.	.	.	.	.	.	.	.	.	.	.	.
gene10756	palm2akap2.L	palm2akap2	LS	.	.	X	X	X	D	D	ei	ei	.	ei	e	i	i	.	ei	.	ei	.	.	.	i	.	ei	.
gene10757	iars1.L	iars1	LS	X	.	.	.	.	.	.	.	.	.	.	.	.	.	.	.	.	.	.	.	.	.	.	.	.
gene10758	ndufa9.L	ndufa9	L	X	.	.	.	.	.	.	.	.	.	.	.	.	.	.	.	.	.	.	.	.	.	.	.	.
gene10759	.	.	.	.	.	.	.	.	.	.	.	.	.	.	.	.	.	.	.	.	.	.	.	.	.	.	.	.
gene1076	snx8.L	snx8	L	X	.	X	X	.	.	.	i	i	.	i	.	i	.	.	.	.	.	.	.	.	.	.	.	.
gene10760	.	.	.	X	.	.	.	.	.	.	.	.	.	.	.	.	.	.	.	.	.	.	.	.	.	.	.	.
gene10761	dtx3.L	dtx3	LS	.	.	.	.	.	.	.	.	.	.	.	.	.	.	.	.	.	.	.	.	.	.	.	.	.
gene10762	cryga.7.L	cryga.7	LS	.	.	.	.	.	.	.	.	.	.	.	.	.	.	.	.	.	.	.	.	.	.	.	.	.
gene10763	qdpr.S	qdpr	LS	X	.	.	.	.	.	.	.	.	e	.	.	.	.	.	.	.	.	.	.	.	.	.	.	.
gene10764	ei24.S	ei24	LS	X	.	.	.	.	.	.	.	.	.	.	.	.	.	.	.	.	.	.	.	.	.	.	.	.
gene10765	.	.	.	X	.	.	X	.	.	.	i	i	.	i	.	.	.	.	.	.	.	.	.	.	.	.	.	.
gene10766	sar1b.L	sar1b	L	.	.	.	.	.	.	.	.	.	.	.	.	.	.	.	.	.	.	.	.	.	.	.	.	.
gene10767	lsm14b.L	lsm14b	LS	X	.	X	X	X	.	D	i	i	.	i	i	i	.	.	.	.	.	.	.	.	i	.	.	.
gene10768	kcnq2.S	kcnq2	LS	.	.	.	.	.	.	.	.	.	.	.	.	.	.	.	.	.	.	.	.	.	.	.	.	.
gene10769	vps16.S	vps16	LS	X	.	.	.	.	.	.	.	.	.	.	.	.	.	.	.	.	.	.	.	.	.	.	.	.
gene1077	rassf8.S	rassf8	LS	X	.	.	.	.	.	.	.	.	.	.	.	.	.	.	.	.	.	.	.	.	.	.	.	.
gene10770	ngdn.L	ngdn	L	X	.	.	.	.	.	.	.	.	.	.	.	.	.	.	.	.	.	.	.	.	.	.	.	.
gene10771	tapbp.S	tapbp	LS	.	.	.	.	.	.	.	.	.	.	.	.	.	.	.	.	.	.	.	.	.	.	.	.	.
gene10772	lin7b.S	lin7b	LS	X	.	.	.	.	.	.	.	.	.	.	.	.	.	.	.	.	.	.	.	.	.	.	.	.
gene10773	pstk.L	pstk	L	X	.	.	.	.	.	U	.	.	.	.	.	.	.	.	.	.	.	.	.	.	.	.	.	e
gene10774	fam3c.L	fam3c	LS	X	.	.	.	.	.	D	.	.	.	.	.	.	.	.	.	.	.	.	.	.	.	.	e	.
gene10775	.	.	.	.	.	.	.	.	.	.	.	.	.	.	.	.	.	.	.	.	.	.	.	.	.	.	.	.
gene10776	epc2.S	epc2	LS	X	.	X	X	X	.	.	i	i	.	i	ei	i	.	.	.	.	.	.	.	.	.	.	.	.
gene10777	.	.	.	.	.	.	.	.	.	.	.	.	.	.	.	.	.	.	.	.	.	.	.	.	.	.	.	.
gene10778	.	.	.	.	.	.	.	.	.	.	.	.	.	.	.	.	.	.	.	.	.	.	.	.	.	.	.	.
gene10779	fermt2.S	fermt2	LS	X	.	.	.	.	.	.	.	.	.	.	.	.	.	.	.	.	.	.	.	.	.	.	.	.
gene1078	anxa1.1.L	anxa1.1	LS	X	.	.	.	.	.	U	.	.	.	.	.	.	.	.	.	.	.	.	.	.	.	.	.	e
gene10780	rapgef5.L	rapgef5	LS	X	.	.	.	X	.	.	.	.	.	.	e	.	.	.	.	.	.	.	.	.	.	.	.	.
gene10781	thoc2.S	thoc2	LS	X	.	.	.	.	.	.	.	.	.	.	.	.	.	.	.	.	.	.	.	.	.	.	.	.
gene10782	iffo1.S	iffo1	LS	.	.	.	.	.	.	.	.	.	.	.	.	.	.	.	.	.	.	.	.	.	.	.	.	.
gene10783	.	.	.	.	.	.	.	.	.	.	.	.	.	.	.	.	.	.	.	.	.	.	.	.	.	.	.	.
gene10784	pank1.L	pank1	LS	X	.	X	X	X	U	D	i	i	.	i	ei	i	.	i	.	i	.	i	.	.	i	.	i	.
gene10785	idnk.L	idnk	L	X	.	.	.	.	.	.	.	.	.	.	.	.	.	.	.	.	.	.	.	.	.	.	.	.
gene10786	elavl3.L	elavl3	L	.	.	.	.	X	.	.	.	.	.	.	e	e	.	.	.	.	.	.	.	.	.	.	.	.
gene10787	.	.	.	.	.	.	.	.	.	.	.	.	.	.	.	.	.	.	.	.	.	.	.	.	.	.	.	.
gene10788	.	.	.	.	.	.	.	.	.	.	.	.	.	.	.	.	.	.	.	.	.	.	.	.	.	.	.	.
gene10789	lgals1.1.S	lgals1.1	LS	.	.	.	.	.	.	.	.	.	.	.	.	.	.	.	.	.	.	.	.	.	.	.	.	.
gene1079	ppp5c.S	ppp5c	LS	X	.	.	.	.	.	.	.	.	.	.	.	.	.	.	.	.	.	.	.	.	.	.	.	.
gene10790	sdcbp.S	sdcbp	LS	X	.	.	X	.	U	.	i	i	.	i	.	.	.	i	.	.	.	.	.	.	.	.	.	.
gene10791	ctse.L	ctse	LS	.	.	.	.	.	.	.	.	.	.	.	.	.	.	.	.	.	.	.	.	.	.	.	.	.
gene10792	mier1.S	mier1	LS	X	.	.	X	X	.	.	i	i	.	i	ei	.	.	.	.	.	.	.	.	.	.	.	.	.
gene10793	mesp2.S	mesp2	LS	.	.	.	.	.	.	.	.	.	.	.	.	.	.	.	.	.	.	.	.	.	.	.	.	.
gene10794	vat1.S	vat1	LS	X	.	.	.	.	.	.	.	.	.	.	.	.	.	.	.	.	.	.	.	.	.	.	.	.
gene10795	ntn1.S	ntn1	LS	.	.	.	.	X	.	.	.	.	e	.	e	.	.	.	.	.	.	.	.	.	.	.	.	.
gene10796	cbx3.S	cbx3	LS	X	.	.	X	X	U	.	i	i	.	i	i	.	.	.	.	.	.	i	.	.	.	.	.	.
gene10797	rnls.L	rnls	L	X	.	.	.	.	.	.	.	.	.	.	.	.	.	.	.	.	.	.	.	.	.	.	.	.
gene10798	cnpy2.L	cnpy2	LS	X	.	.	.	.	.	.	.	.	.	.	.	.	.	.	.	.	.	.	.	.	.	.	.	.
gene10799	armh3.L	armh3	L	X	.	.	.	.	.	.	.	.	.	.	.	.	.	.	.	.	.	.	.	.	.	.	.	.
gene108	pcnp.L	pcnp	LS	X	.	.	.	X	.	.	.	.	.	i	ei	.	.	.	.	.	.	.	.	.	.	.	.	.
gene1080	mxi1.L	mxi1	LS	X	.	X	X	X	U	.	i	i	.	ei	ei	i	.	ei	.	ei	.	ei	.	.	.	.	.	.
gene10800	.	.	.	.	.	X	X	.	.	.	e	e	.	e	.	e	.	.	.	.	.	.	.	.	.	.	.	.
gene10801	btbd10.S	btbd10	LS	X	.	.	X	.	.	.	i	i	.	i	.	.	.	.	.	.	.	.	.	.	.	.	.	.
gene10802	.	.	.	.	.	.	.	.	.	.	.	.	.	.	.	.	.	.	.	.	.	.	.	.	.	.	.	.
gene10803	cavin1.S	cavin1	LS	.	.	.	.	.	.	.	.	.	.	.	.	.	.	.	.	.	.	.	.	.	.	.	.	.
gene10804	zbtb11.S	zbtb11	LS	X	X	.	X	X	U	U	i	i	i	i	i	.	.	i	.	i	.	i	.	.	.	.	.	i
gene10805	lysmd4.S	lysmd4	LS	X	.	.	.	.	.	D	.	.	e	e	.	.	.	.	.	.	.	.	.	.	.	.	e	.
gene10806	socs2.L	socs2	LS	X	.	.	.	.	.	.	.	.	.	.	.	.	.	.	.	.	.	.	.	.	.	.	.	.
gene10807	.	.	.	.	.	.	.	.	.	.	.	.	.	.	.	.	.	.	.	.	.	.	.	.	.	.	.	.
gene10808	ppp1r9b.S	ppp1r9b	LS	.	.	.	.	.	.	.	.	.	.	.	.	.	.	.	.	.	.	.	.	.	.	.	.	.
gene10809	galk2.L	galk2	L	X	.	.	.	.	.	.	.	.	.	.	.	.	.	.	.	.	.	.	.	.	.	.	.	.
gene1081	.	.	.	.	.	.	.	.	.	.	.	.	.	.	.	.	.	.	.	.	.	.	.	.	.	.	.	.
gene10810	homer2.S	homer2	LS	X	.	.	.	.	.	.	.	.	.	.	.	.	.	.	.	.	.	.	.	.	.	.	.	.
gene10811	.	.	.	X	.	.	.	.	.	.	.	.	.	.	.	.	.	.	.	.	.	.	.	.	.	.	.	.
gene10812	pip4p1.L	pip4p1	LS	X	.	.	.	.	.	.	.	.	.	.	.	.	.	.	.	.	.	.	.	.	.	.	.	.
gene10813	stx8.S	stx8	S	X	.	.	.	.	.	.	.	.	.	.	.	.	.	.	.	.	.	.	.	.	.	.	.	.
gene10814	vash1.L	vash1	L	X	.	.	.	.	.	U	.	.	e	e	.	.	.	.	.	.	.	.	.	.	.	.	.	e
gene10815	atraid.S	atraid	S	X	.	.	.	.	.	.	.	.	.	.	.	.	.	.	.	.	.	.	.	.	.	.	.	.
gene10816	cldn12.L	cldn12	LS	X	.	.	.	X	.	.	.	.	e	.	e	.	.	.	.	.	.	.	.	.	.	.	.	.
gene10817	clcc1.L	clcc1	LS	X	.	.	.	.	.	.	.	.	.	.	.	.	.	.	.	.	.	.	.	.	.	.	.	.
gene10818	s1pr2.S	s1pr2	LS	.	.	.	.	.	.	.	.	.	.	.	.	.	.	.	.	.	.	.	.	.	.	.	.	.
gene10819	cacybp.L	cacybp	LS	X	.	.	X	.	.	.	i	i	.	i	.	.	.	.	.	.	.	.	.	.	.	.	.	.
gene1082	mpo.L	mpo	LS	.	.	.	.	.	.	.	.	.	.	.	.	.	.	.	.	.	.	.	.	.	.	.	.	.
gene10820	p2ry14.S	p2ry14	LS	.	.	.	.	.	.	.	.	.	.	.	.	.	.	.	.	.	.	.	.	.	.	.	.	.
gene10821	src.L	src	LS	X	.	X	X	X	.	D	i	i	.	i	i	i	.	.	.	.	.	.	.	.	i	.	.	.
gene10822	aebp2.S	aebp2	LS	X	.	.	.	.	.	.	.	.	.	i	.	.	.	.	.	.	.	.	.	.	.	.	.	.
gene10823	XB22169453.L [provisional]	XB22169453 [provisional]	LS	X	.	.	.	.	.	.	.	.	.	.	.	.	.	.	.	.	.	.	.	.	.	.	.	.
gene10824	.	.	.	X	.	.	.	.	.	.	.	.	e	.	.	.	.	.	.	.	.	.	.	.	.	.	.	.
gene10825	dcaf12.L	dcaf12	LS	X	.	.	.	.	.	.	.	.	.	.	.	.	.	.	.	.	.	.	.	.	.	.	.	.
gene10826	stmn2.S	stmn2	LS	.	.	.	.	.	.	.	.	.	.	.	.	.	.	.	.	.	.	.	.	.	.	.	.	.
gene10827	heg1.S	heg1	LS	.	.	.	.	.	.	.	.	.	.	.	.	.	.	.	.	.	.	.	.	.	.	.	.	.
gene10828	tmem170b.S	tmem170b	LS	.	.	.	.	.	.	.	.	.	.	.	.	.	.	.	.	.	.	.	.	.	.	.	.	.
gene10829	rpl31.S	rpl31	LS	X	.	.	X	X	.	.	i	i	.	i	ei	.	.	.	.	.	.	.	.	.	.	.	.	.
gene1083	.	.	.	X	.	.	.	.	.	D	.	.	.	e	.	.	.	.	.	.	.	.	.	.	.	.	e	.
gene10830	mllt11.S	mllt11	LS	.	.	.	.	.	.	.	.	.	.	.	.	.	.	.	.	.	.	.	.	.	.	.	.	.
gene10831	arsk.L	arsk	L	X	.	.	.	X	.	.	.	.	.	.	e	.	.	.	.	.	.	.	.	.	.	.	.	.
gene10832	usp45.L	usp45	L	X	.	.	.	.	.	.	.	.	.	.	.	.	.	.	.	.	.	.	.	.	.	.	.	.
gene10833	.	.	.	.	.	.	.	.	.	.	.	.	.	.	.	.	.	.	.	.	.	.	.	.	.	.	.	.
gene10834	psmb2.S	psmb2	LS	X	.	.	.	.	.	.	.	.	.	.	.	.	.	.	.	.	.	.	.	.	.	.	.	.
gene10835	gata3.S	gata3	LS	.	.	X	X	X	U	D	i	i	.	ei	ei	ei	.	i	.	i	.	ei	.	.	i	.	.	.
gene10836	mgc147600.L	mgc147600	LS	.	.	.	.	.	.	.	.	.	.	.	.	.	.	.	.	.	.	.	.	.	.	.	.	.
gene10837	brip1.L	brip1	L	X	.	.	.	.	.	.	.	.	.	.	.	.	.	.	.	.	.	.	.	.	.	.	.	.
gene10838	poll.L	poll	L	X	.	.	.	.	.	.	.	.	.	.	.	.	.	.	.	.	.	.	.	.	.	.	.	.
gene10839	tmc5.S	tmc5	LS	.	.	.	.	.	.	.	.	.	.	.	.	.	.	.	.	.	.	.	.	.	.	.	.	.
gene1084	.	.	.	.	.	.	.	X	.	.	e	.	.	e	e	e	.	.	.	.	.	.	.	.	.	.	.	.
gene10840	.	.	.	.	.	.	.	.	.	D	.	.	.	.	.	.	.	.	.	.	.	.	.	.	e	.	.	.
gene10841	ttc30a.S	ttc30a	S	X	.	X	X	.	U	.	i	i	.	ei	.	i	.	i	.	i	.	.	.	.	.	.	.	.
gene10842	sec61g.L	sec61g	LS	X	.	.	X	X	.	.	i	i	.	i	ei	.	.	.	.	.	.	.	.	.	.	.	.	.
gene10843	axin2.S	axin2	LS	X	.	X	X	X	U	D	i	i	.	i	ei	i	.	i	.	i	.	i	.	.	i	.	.	.
gene10844	oat.1.L	oat	LS	X	.	X	X	.	D	D	i	i	.	i	.	i	i	.	i	.	i	.	.	.	i	.	.	.
gene10845	otud7b.S	otud7b	LS	X	.	.	.	.	.	.	.	.	.	.	.	.	.	.	.	.	.	.	.	.	.	.	.	.
gene10846	asphd2.S	asphd2	LS	X	.	.	.	.	U	U	.	.	.	e	.	.	.	e	.	.	.	.	.	.	.	.	.	e
gene10847	alg1.L	alg1	L	X	.	.	.	.	.	.	.	.	.	.	.	.	.	.	.	.	.	.	.	.	.	.	.	.
gene10848	.	.	.	.	.	.	.	.	.	.	.	.	.	.	.	.	.	.	.	.	.	.	.	.	.	.	.	.
gene10849	rnf19a.L	rnf19a	LS	X	X	X	X	X	.	D	i	i	i	i	i	i	.	.	.	.	.	.	.	.	i	.	.	.
gene1085	nudt7.L	nudt7	L	.	.	.	.	.	.	.	e	.	.	e	.	.	.	.	.	.	.	.	.	.	.	.	.	.
gene10850	.	.	.	.	.	.	.	.	.	.	.	.	.	.	.	.	.	.	.	.	.	.	.	.	.	.	.	.
gene10851	.	.	.	.	.	.	.	.	.	.	.	.	.	.	.	.	.	.	.	.	.	.	.	.	.	.	.	.
gene10852	nipsnap3a.L	nipsnap3a	LS	X	.	.	.	.	.	.	.	.	.	.	.	.	.	.	.	.	.	.	.	.	.	.	.	.
gene10853	cebpg.L	cebpg	LS	X	.	.	.	.	.	.	.	.	.	.	.	.	.	.	.	.	.	.	.	.	.	.	.	.
gene10854	hemk1.L	hemk1	L	X	.	.	.	.	.	.	.	.	.	.	.	.	.	.	.	.	.	.	.	.	.	.	.	.
gene10855	hoxd3.S	hoxd3	LS	.	.	.	.	.	.	.	.	.	.	.	.	.	.	.	.	.	.	.	.	.	.	.	.	.
gene10856	ift43.L	ift43	L	X	.	.	.	.	D	.	.	.	.	.	.	.	.	.	.	.	e	.	.	.	.	.	.	.
gene10857	tardbp.S	tardbp	LS	X	.	.	.	.	.	.	.	.	.	.	.	.	.	.	.	.	.	.	.	.	.	.	.	.
gene10858	.	.	.	X	.	.	.	.	.	.	.	.	.	.	.	.	.	.	.	.	.	.	.	.	.	.	.	.
gene10859	rbms2.S	rbms2	LS	.	.	.	.	X	.	D	.	i	ei	i	ei	i	.	.	.	.	.	.	i	.	ei	.	i	.
gene1086	eri2.L	eri2	L	X	.	.	.	.	.	.	.	.	.	.	.	.	.	.	.	.	.	.	.	.	.	.	.	.
gene10860	kiaa0319l.L	kiaa0319l	LS	X	.	.	.	.	.	.	.	.	.	e	.	.	.	.	.	.	.	.	.	.	.	.	.	.
gene10861	apoa4.L	apoa4	LS	.	.	.	.	.	.	.	.	.	.	.	.	.	.	.	.	.	.	.	.	.	.	.	.	.
gene10862	rnf40.S	rnf40	LS	X	X	.	X	X	.	.	i	i	i	i	ei	.	.	.	.	.	.	.	.	.	.	.	.	.
gene10863	irf5.S	irf5	LS	X	.	.	.	X	.	D	.	.	.	.	e	.	.	.	.	.	.	.	.	.	.	.	e	.
gene10864	.	.	.	.	.	.	.	.	.	.	.	.	.	.	.	.	.	.	.	.	.	.	.	.	.	.	.	.
gene10865	lrsam1.L	lrsam1	LS	X	.	.	.	.	.	.	.	.	.	e	.	.	.	.	.	.	.	.	.	.	.	.	.	.
gene10866	pltp.S	pltp	LS	.	.	.	.	.	.	.	.	.	.	.	.	.	.	.	.	.	.	.	.	.	.	.	.	.
gene10867	dcaf10.S	dcaf10	LS	X	.	.	X	.	U	.	i	i	.	i	.	.	.	.	.	i	.	.	.	.	.	.	.	.
gene10868	ints5.L	ints5	L	X	.	.	.	.	.	.	.	.	.	.	.	.	.	.	.	.	.	.	.	.	.	.	.	.
gene10869	.	.	.	.	.	.	.	.	.	.	.	.	.	.	.	.	.	.	.	.	.	.	.	.	.	.	.	.
gene1087	dock1.L	dock1	LS	X	.	.	.	.	.	.	.	.	.	.	.	.	.	.	.	.	.	.	.	.	.	.	.	.
gene10870	golgb1.L	golgb1	LS	X	.	.	.	.	.	.	.	.	.	e	.	.	.	.	.	.	.	.	.	.	.	.	.	.
gene10871	.	.	.	.	.	.	.	.	.	.	.	.	.	.	.	.	.	.	.	.	.	.	.	.	.	.	.	.
gene10872	guca1a.L	guca1a	LS	.	.	.	.	.	.	.	.	.	.	.	.	.	.	.	.	.	.	.	.	.	.	.	.	.
gene10873	.	.	.	.	.	.	.	.	.	.	.	.	.	.	.	.	.	.	.	.	.	.	.	.	.	.	.	.
gene10874	stk35.S	stk35	S	X	.	.	X	.	.	.	i	i	.	i	.	.	.	.	.	.	.	.	.	.	.	.	.	.
gene10875	myo1e.1.L	myo1e.1	L	X	.	.	.	.	.	.	.	.	.	.	.	.	.	.	.	.	.	.	.	.	.	.	.	.
gene10876	mxi1.S	mxi1	LS	X	.	.	X	X	D	U	i	i	.	i	e	.	.	.	.	.	i	.	.	.	.	.	.	e
gene10877	mc2r.L	mc2r	L	.	.	.	.	.	.	U	.	.	.	e	.	.	.	.	.	.	.	.	.	.	.	.	.	e
gene10878	dnaja3.L	dnaja3	LS	X	.	.	.	.	.	.	.	.	.	.	.	.	.	.	.	.	.	.	.	.	.	.	.	.
gene10879	stau1.L	stau1	LS	X	.	.	X	X	.	.	i	i	.	i	ei	.	.	.	.	.	.	.	.	.	.	.	.	.
gene1088	.	.	.	.	.	.	.	.	.	.	.	.	.	.	.	.	.	.	.	.	.	.	.	.	.	.	.	.
gene10880	.	.	.	X	.	.	.	.	.	.	.	.	.	.	.	.	.	.	.	.	.	.	.	.	.	.	.	.
gene10881	psmd11.L	psmd11	LS	X	.	.	X	X	U	.	i	i	.	i	i	.	.	i	.	.	.	i	.	.	.	.	.	.
gene10882	srf.L	srf	LS	X	.	X	X	X	U	D	i	i	.	i	i	i	.	i	.	.	.	i	.	.	i	.	.	.
gene10883	spns2.L	spns2	LS	.	.	.	.	X	.	.	.	.	.	.	e	.	.	.	.	.	.	.	.	.	.	.	.	.
gene10884	prkra.L	prkra	L	X	.	.	.	.	.	.	i	.	.	i	.	.	.	.	.	.	.	.	.	.	.	.	.	.
gene10885	chrm1.S	chrm1	LS	.	.	.	.	.	.	.	.	.	.	.	.	.	.	.	.	.	.	.	.	.	.	.	.	.
gene10886	rplp1.L	rplp1	L	X	.	.	.	X	U	.	i	.	.	i	i	.	.	.	.	.	.	e	.	.	.	.	.	.
gene10887	col8a1.L	col8a1	LS	.	.	.	.	.	.	.	.	.	.	.	.	.	.	.	.	.	.	.	.	.	.	.	.	.
gene10888	gypc.S	gypc	LS	.	.	.	.	.	.	.	.	.	.	.	.	.	.	.	.	.	.	.	.	.	.	.	.	.
gene10889	.	.	.	.	.	.	.	X	.	.	.	.	e	.	e	.	.	.	.	.	.	.	.	.	.	.	.	.
gene1089	arsb.L	arsb	L	X	.	.	.	.	.	.	.	.	.	.	.	.	.	.	.	.	.	.	.	.	.	.	.	.
gene10890	gpi.L	gpi	LS	X	.	.	.	.	.	U	.	.	.	.	.	.	.	.	.	.	.	.	.	.	.	.	.	e
gene10891	dennd1c.S	dennd1c	LS	.	.	.	.	.	.	.	.	.	.	.	.	.	.	.	.	.	.	.	.	.	.	.	.	.
gene10892	fgl1a.L	fgl1a	L	.	.	.	.	.	.	.	.	.	.	.	.	.	.	.	.	.	.	.	.	.	.	.	.	.
gene10893	tal2.S	tal2	S	.	.	.	.	.	.	.	.	.	.	.	.	.	.	.	.	.	.	.	.	.	.	.	.	.
gene10894	.	.	.	X	.	.	.	.	.	.	.	.	.	.	.	.	.	.	.	.	.	.	.	.	.	.	.	.
gene10895	crem.L	crem	LS	X	.	.	.	.	.	.	.	.	.	.	.	.	.	.	.	.	.	.	.	.	.	.	.	.
gene10896	jun.L	jun	LS	X	.	.	.	.	.	.	.	.	.	e	.	.	.	.	.	.	.	.	.	.	.	.	.	.
gene10897	cep83.L	cep83	LS	X	.	.	.	.	.	.	.	.	.	.	.	.	.	.	.	.	.	.	.	.	.	.	.	.
gene10898	cyp51a1.L	cyp51a1	LS	X	.	.	.	.	.	.	.	.	.	.	.	.	.	.	.	.	.	.	.	.	.	.	.	.
gene10899	incenp.S	incenp	LS	X	.	.	.	X	.	.	.	i	i	i	i	.	.	.	.	.	.	.	.	.	.	.	.	.
gene109	.	.	.	X	.	.	.	.	.	.	.	.	.	.	.	.	.	.	.	.	.	.	.	.	.	.	.	.
gene1090	rbm14.L	rbm14	LS	X	.	.	X	X	U	.	i	i	.	i	ei	.	.	i	.	.	.	.	.	.	.	.	.	.
gene10900	poldip3.L	poldip3	LS	X	.	X	X	.	U	D	i	i	.	i	.	i	.	i	.	.	.	.	.	.	i	.	.	.
gene10901	.	.	.	.	.	.	.	.	.	.	.	.	.	.	.	.	.	.	.	.	.	.	.	.	.	.	.	.
gene10902	prep.L	prep	LS	X	.	.	.	.	.	.	.	.	.	.	.	.	.	.	.	.	.	.	.	.	.	.	.	.
gene10903	kcnv2.S	kcnv2	LS	.	.	.	.	.	.	.	.	.	.	.	.	.	.	.	.	.	.	.	.	.	.	.	.	.
gene10904	.	.	.	.	.	.	.	.	.	.	.	.	e	e	.	.	.	.	.	.	.	.	.	.	.	.	.	.
gene10905	XB5796436.S [provisional:mgst3]	XB5796436 [provisional:mgst3]	LS	.	.	.	.	.	.	.	.	.	e	.	.	.	.	.	.	.	.	.	.	.	.	.	.	.
gene10906	recql5.L	recql5	L	X	.	.	.	.	.	.	.	.	.	.	.	.	.	.	.	.	.	.	.	.	.	.	.	.
gene10907	nrros.L	nrros	LS	.	.	.	.	.	.	.	.	.	.	.	.	.	.	.	.	.	.	.	.	.	.	.	.	.
gene10908	.	.	.	.	.	.	.	.	.	.	.	.	.	.	.	.	.	.	.	.	.	.	.	.	.	.	.	.
gene10909	ralgapa2.S	ralgapa2	LS	X	.	.	.	.	.	.	.	.	.	.	.	.	.	.	.	.	.	.	.	.	.	.	.	.
gene1091	XB5993457.L [provisional:aqp4]	XB5993457 [provisional:aqp4]	LS	.	.	.	.	.	.	.	.	.	.	.	.	.	.	.	.	.	.	.	.	.	.	.	.	.
gene10910	xpnpep1.L	xpnpep1	L	X	.	.	.	.	.	.	.	.	.	i	.	i	.	.	.	.	.	.	.	.	.	.	.	.
gene10911	col14a1.L	col14a1	LS	.	.	.	.	X	.	.	.	.	e	.	e	.	.	.	.	.	.	.	.	.	.	.	.	.
gene10912	cd40lg.S	cd40lg	LS	.	.	.	.	.	.	.	.	.	.	.	.	.	.	.	.	.	.	.	.	.	.	.	.	.
gene10913	.	.	.	X	.	.	.	.	.	.	.	.	.	.	.	.	.	.	.	.	.	.	.	.	.	.	.	.
gene10914	itga7.L	itga7	LS	.	.	.	.	.	.	.	.	.	.	.	.	.	.	.	.	.	.	.	.	.	.	.	.	.
gene10915	ccdc59.L	ccdc59	L	X	X	.	X	.	.	.	i	i	i	i	.	.	.	.	.	.	.	.	.	.	.	.	.	.
gene10916	.	.	.	.	.	.	.	.	.	.	.	.	.	.	.	.	.	.	.	.	.	.	.	.	.	.	.	.
gene10917	slc5a3.L	slc5a3	LS	.	.	.	.	.	.	D	.	.	.	.	.	.	.	.	.	.	.	.	.	.	.	.	e	.
gene10918	tlx3.L	tlx3	LS	.	.	.	.	.	.	.	e	.	.	e	.	e	.	.	.	.	.	.	.	.	.	.	.	.
gene10919	.	.	.	.	.	.	.	.	.	.	.	.	.	.	.	.	.	.	.	.	.	.	.	.	.	.	.	.
gene1092	c1orf158.L	c1orf158	L	X	.	.	.	.	.	.	.	.	.	.	.	.	.	.	.	.	.	.	.	.	.	.	.	.
gene10920	.	.	.	X	.	.	.	X	.	D	.	.	.	.	e	.	.	.	.	.	.	.	.	.	.	.	e	.
gene10921	lif.S	lif	LS	.	.	.	.	.	.	.	ei	.	.	.	.	.	.	.	.	.	.	.	.	.	.	.	.	.
gene10922	.	.	.	.	.	.	.	.	.	.	.	.	.	.	.	.	.	.	.	.	.	.	.	.	.	.	.	.
gene10923	zbtb1.L	zbtb1	LS	X	.	.	.	.	.	.	.	.	.	.	.	.	.	.	.	.	.	.	.	.	.	.	.	.
gene10924	bmpr1b.L	bmpr1b	LS	X	.	.	.	.	.	D	.	.	.	.	.	.	.	.	.	.	.	.	.	.	.	.	e	.
gene10925	epb42.S	epb42	LS	.	.	.	.	.	.	.	.	.	.	.	.	.	.	.	.	.	.	.	.	.	.	.	.	.
gene10926	.	.	.	.	.	.	.	.	.	.	.	.	.	.	.	.	.	.	.	.	.	.	.	.	.	.	.	.
gene10927	XB5832479.L [provisional:cdc25c]	XB5832479 [provisional:cdc25c]	LS	.	.	.	.	.	.	.	.	.	.	.	.	.	.	.	.	.	.	.	.	.	.	.	.	.
gene10928	crhr2.S	crhr2	LS	.	.	.	.	.	.	.	.	.	.	.	.	.	.	.	.	.	.	.	.	.	.	.	.	.
gene10929	aph1a.S	aph1a	LS	X	.	.	.	.	.	.	.	.	.	.	.	.	.	.	.	.	.	.	.	.	.	.	.	.
gene1093	.	.	.	X	.	.	.	.	.	.	.	.	.	.	.	.	.	.	.	.	.	.	.	.	.	.	.	.
gene10930	mthfs.L	mthfs	LS	X	.	.	.	.	.	.	.	.	.	.	.	.	.	.	.	.	.	.	.	.	.	.	.	.
gene10931	cyp26c1.L	cyp26c1	LS	.	.	.	.	X	.	.	.	.	.	.	e	e	.	.	.	.	.	.	.	.	.	.	.	.
gene10932	tmem178.2.L	tmem178.2	L	X	.	.	.	.	.	D	.	.	.	.	.	.	.	.	.	.	.	.	.	.	.	.	e	.
gene10933	zkscan8.L	zkscan8	LS	X	.	.	.	X	.	.	.	.	.	.	e	.	.	.	.	.	.	.	.	.	.	.	.	.
gene10934	nodal5.L	nodal5	L	.	.	X	X	.	.	.	e	e	.	e	.	e	.	.	.	.	.	.	.	.	.	.	.	.
gene10935	pla2g7.L	pla2g7	L	X	.	.	.	.	.	D	.	.	.	.	.	.	.	.	.	.	.	.	.	.	.	.	e	.
gene10936	.	.	.	X	.	X	X	.	.	D	i	i	.	i	.	i	.	.	.	.	.	.	i	.	i	.	.	.
gene10937	atp6v1g1.S	atp6v1g1	LS	X	.	.	.	.	D	.	.	.	.	.	.	.	.	.	.	.	.	.	.	.	.	.	.	.
gene10938	armc1.S	armc1	LS	X	.	.	X	.	U	.	i	i	.	i	.	.	.	i	.	.	.	.	.	.	.	.	.	.
gene10939	tex26.L	tex26	LS	X	.	.	.	.	.	.	.	.	.	.	.	.	.	.	.	.	.	.	.	.	.	.	.	.
gene1094	itpa.S	itpa	S	X	.	.	.	.	.	.	.	.	.	.	.	.	.	.	.	.	.	.	.	.	.	.	.	.
gene10940	ttc19.S	ttc19	S	X	.	.	.	.	.	.	.	.	.	.	.	.	.	.	.	.	.	.	.	.	.	.	.	.
gene10941	.	.	.	.	.	.	.	.	.	.	.	.	.	.	.	.	.	.	.	.	.	.	.	.	.	.	.	.
gene10942	psmb5.L	psmb5	LS	X	.	.	.	.	.	.	.	.	.	.	.	.	.	.	.	.	.	.	.	.	.	.	.	.
gene10943	.	.	.	.	.	.	.	.	.	.	.	.	.	.	.	.	.	.	.	.	.	.	.	.	.	.	.	.
gene10944	adgrl2.L	adgrl2	LS	X	X	X	X	X	.	D	i	i	i	i	i	i	.	.	.	.	.	.	i	.	i	.	i	.
gene10945	.	.	.	.	.	.	.	.	.	.	.	.	.	.	.	.	.	.	.	.	.	.	.	.	.	.	.	.
gene10946	tnfsf13b.L	tnfsf13b	L	.	.	.	.	.	.	.	.	.	.	.	.	.	.	.	.	.	.	.	.	.	.	.	.	.
gene10947	bbox1.S	bbox1	S	X	.	.	.	X	.	D	.	.	.	.	e	.	.	.	.	.	.	.	.	.	.	.	e	.
gene10948	.	.	.	.	.	.	.	X	.	D	.	.	.	.	e	.	.	.	.	.	.	.	.	.	.	.	e	.
gene10949	tmem121.L	tmem121	LS	.	.	.	.	.	.	.	.	.	.	.	.	.	.	.	.	.	.	.	.	.	.	.	.	.
gene1095	wdr47.L	wdr47	LS	X	.	.	.	.	.	.	.	.	.	.	.	.	.	.	.	.	.	.	.	.	.	.	.	.
gene10950	ppp1r2.S	ppp1r2	LS	X	.	.	X	.	.	.	i	i	.	i	.	.	.	.	.	.	.	.	.	.	.	.	.	.
gene10951	skap2.S	skap2	LS	.	.	.	.	.	.	.	.	.	.	.	.	.	.	.	.	.	.	.	.	.	.	.	.	.
gene10952	cyct.L	cyct	LS	X	.	.	.	.	.	.	.	.	.	.	.	.	.	.	.	.	.	.	.	.	.	.	.	.
gene10953	spred1.L	spred1	LS	.	X	X	X	X	U	D	i	i	e	i	ei	i	.	i	.	i	.	i	.	.	i	.	i	.
gene10954	ldb3.S	ldb3	S	.	.	.	.	.	.	.	.	.	.	.	.	.	.	.	.	.	.	.	.	.	.	.	.	.
gene10955	clba1.S	clba1	LS	X	.	.	.	.	.	.	.	.	.	.	.	.	.	.	.	.	.	.	.	.	.	.	.	.
gene10956	mcam.S	mcam	LS	.	.	.	.	.	.	.	.	.	.	.	.	.	.	.	.	.	.	.	.	.	.	.	.	.
gene10957	fam163b.S	fam163b	LS	.	.	.	.	.	.	.	.	.	.	.	.	.	.	.	.	.	.	.	.	.	.	.	.	.
gene10958	ano10.L	ano10	L	X	.	.	.	.	.	.	.	.	.	.	.	.	.	.	.	.	.	.	.	.	.	.	.	.
gene10959	pin1.S	pin1	LS	X	.	.	.	X	.	.	.	.	.	.	e	.	.	.	.	.	.	.	.	.	.	.	.	.
gene1096	.	.	.	.	.	.	.	.	.	.	.	.	.	.	.	.	.	.	.	.	.	.	.	.	.	.	.	.
gene10960	lmx1b.2.L	lmx1b.2	L	.	.	.	.	.	.	.	.	.	.	.	.	.	.	.	.	.	.	.	.	.	.	.	.	.
gene10961	ankrd11.L	ankrd11	LS	X	X	X	X	X	.	D	i	i	i	i	i	i	.	.	.	.	.	.	.	.	i	.	.	.
gene10962	nop2.L	nop2	L	X	.	.	X	X	.	.	i	i	.	i	ei	.	.	.	.	.	.	.	.	.	.	.	.	.
gene10963	xlcgf26.1l.L	xlcgf26.1l	L	.	.	.	.	.	.	.	.	.	e	e	.	.	.	.	.	.	.	.	.	.	.	.	.	.
gene10964	nrg1.L	nrg1	L	.	.	.	.	.	D	D	.	.	e	e	.	.	.	.	e	.	.	.	.	.	.	.	e	.
gene10965	rnft2.S	rnft2	LS	X	.	.	.	.	.	U	.	.	.	.	.	.	.	.	.	.	.	.	.	.	.	.	.	e
gene10966	ndc80.S	ndc80	LS	X	X	.	X	X	.	.	i	i	i	i	ei	.	.	.	.	.	.	.	.	.	.	.	.	.
gene10967	.	.	.	X	.	.	.	.	.	.	.	.	.	.	.	e	.	.	.	.	.	.	.	.	.	.	.	.
gene10968	arsd.L	arsd	L	X	.	.	.	.	.	.	.	.	.	.	.	.	.	.	.	.	.	.	.	.	.	.	.	.
gene10969	tbc1d23.S	tbc1d23	LS	X	.	.	.	.	.	.	.	.	.	.	.	.	.	.	.	.	.	.	.	.	.	.	.	.
gene1097	pgr.S	pgr	LS	.	.	.	.	.	.	.	.	.	e	e	.	.	.	.	.	.	.	.	.	.	.	.	.	.
gene10970	XB984297.L [provisional:cyp27a1]	XB984297 [provisional:cyp27a1]	L	.	.	.	.	.	.	.	.	.	.	.	.	.	.	.	.	.	.	.	.	.	.	.	.	.
gene10971	sntb1.S	sntb1	LS	.	.	.	.	X	.	D	.	.	.	.	e	.	.	.	.	.	.	.	.	.	.	.	e	.
gene10972	snx5.L	snx5	LS	X	.	.	.	.	.	.	.	.	.	.	.	.	.	.	.	.	.	.	.	.	.	.	.	.
gene10973	fgg.S	fgg	LS	.	.	.	.	.	.	.	.	.	.	.	.	.	.	.	.	.	.	.	.	.	.	.	.	.
gene10974	.	.	.	X	.	.	.	.	.	.	.	.	.	.	.	.	.	.	.	.	.	.	.	.	.	.	.	.
gene10975	zswim4.L	zswim4	LS	X	.	X	X	X	.	D	i	i	.	i	e	i	.	.	.	.	.	.	.	.	i	.	.	.
gene10976	.	.	.	X	.	.	.	.	.	.	.	.	.	.	.	.	.	.	.	.	.	.	.	.	.	.	.	.
gene10977	c1orf74.L	c1orf74	L	X	.	.	.	.	.	.	.	.	.	.	.	.	.	.	.	.	.	.	.	.	.	.	.	.
gene10978	dennd6b.L	dennd6b	L	.	.	.	.	.	.	.	.	.	.	.	.	.	.	.	.	.	.	.	.	.	.	.	.	.
gene10979	pa2g4.L	pa2g4	LS	X	X	X	X	.	U	D	i	i	i	i	.	i	.	i	.	.	.	.	.	.	i	.	.	.
gene1098	.	.	.	X	.	.	.	.	.	.	.	.	.	.	.	.	.	.	.	.	.	.	.	.	.	.	.	.
gene10980	gpr68.S	gpr68	S	.	.	.	.	.	.	.	.	.	.	.	.	.	.	.	.	.	.	.	.	.	.	.	.	.
gene10981	accs.L	accs	LS	X	.	.	.	.	.	.	.	.	.	.	.	.	.	.	.	.	.	.	.	.	.	.	.	.
gene10982	spats2.L	spats2	LS	X	.	.	.	.	.	.	.	.	.	.	.	.	.	.	.	.	.	.	.	.	.	.	.	.
gene10983	rdh5.L	rdh5	LS	.	.	.	.	.	.	.	.	.	.	.	.	.	.	.	.	.	.	.	.	.	.	.	.	.
gene10984	tpgs1.L	tpgs1	LS	X	.	.	.	.	.	.	.	.	.	.	.	.	.	.	.	.	.	.	.	.	.	.	.	.
gene10985	.	.	.	.	.	.	.	.	.	.	.	.	.	.	.	.	.	.	.	.	.	.	.	.	.	.	.	.
gene10986	pmpcb.L	pmpcb	LS	X	.	.	.	.	.	.	.	.	.	.	.	.	.	.	.	.	.	.	.	.	.	.	.	.
gene10987	msx1.L	msx1	LS	.	.	.	.	X	U	D	.	ei	.	ei	ei	ei	.	.	.	.	.	ei	.	.	ei	.	.	.
gene10988	chpf2.S	chpf2	S	X	.	.	.	.	.	.	.	.	.	.	.	.	.	.	.	.	.	.	.	.	.	.	.	.
gene10989	.	.	.	.	.	.	.	.	.	.	.	.	.	.	.	.	.	.	.	.	.	.	.	.	.	.	.	.
gene1099	.	.	.	.	.	.	.	.	.	.	.	.	.	.	.	.	.	.	.	.	.	.	.	.	.	.	.	.
gene10990	.	.	.	.	.	.	.	.	.	.	.	.	.	.	.	.	.	.	.	.	.	.	.	.	.	.	.	.
gene10991	.	.	.	.	.	.	.	.	.	.	.	.	.	.	.	.	.	.	.	.	.	.	.	.	.	.	.	.
gene10992	pcca.L	pcca	L	X	.	.	.	.	.	.	.	.	.	.	.	.	.	.	.	.	.	.	.	.	.	.	.	.
gene10993	c5orf15.S	c5orf15	S	X	.	.	X	X	U	.	i	i	.	i	ei	.	.	i	.	ei	.	ei	.	.	.	.	.	.
gene10994	slc47a2.S	slc47a2	S	.	.	.	.	.	.	.	.	.	.	.	.	.	.	.	.	.	.	.	.	.	.	.	.	.
gene10995	gip.S	gip	LS	X	.	.	.	.	.	U	.	.	e	.	.	.	.	.	.	.	.	.	.	.	.	.	.	e
gene10996	frrs1.L	frrs1	LS	X	.	.	.	.	.	.	.	.	.	.	.	.	.	.	.	.	.	.	.	.	.	.	.	.
gene10997	dazap1.L	dazap1	LS	X	.	X	X	X	U	D	i	i	.	i	ei	i	.	i	.	i	.	i	.	.	i	.	.	.
gene10998	tmem243.L	tmem243	LS	X	.	.	.	.	.	.	.	.	.	.	.	.	.	.	.	.	.	.	.	.	.	.	.	.
gene10999	has-rs.S	has-rs	S	.	.	X	X	X	D	D	ei	ei	.	ei	e	ei	ei	.	e	.	ei	.	e	.	ei	.	ei	.
gene11	adamts16.L	adamts16	L	X	.	.	.	.	.	.	.	.	.	.	.	.	.	.	.	.	.	.	.	.	.	.	.	.
gene110	slitrk6.L	slitrk6	LS	.	.	.	.	.	.	.	.	.	.	.	.	.	.	.	.	.	.	.	.	.	.	.	.	.
gene1100	rin2.L	rin2	LS	.	.	.	.	X	.	D	.	.	e	e	e	.	.	.	.	.	.	.	.	.	.	.	e	.
gene11000	rabggtb.L	rabggtb	LS	X	.	.	.	.	.	.	.	.	.	.	.	.	.	.	.	.	.	.	.	.	.	.	.	.
gene11001	prkaa1.L	prkaa1	L	X	.	X	X	X	U	.	i	i	.	i	i	i	.	i	.	i	.	.	.	.	.	.	.	.
gene11002	tram2.S	tram2	LS	X	.	X	X	X	U	.	i	i	.	i	i	i	.	i	.	.	.	.	.	.	.	.	.	.
gene11003	nrdc.S	nrdc	LS	X	.	.	.	.	.	.	.	.	.	e	.	.	.	.	.	.	.	.	.	.	.	.	.	.
gene11004	gpr63.S	gpr63	LS	.	.	.	.	X	.	.	.	.	e	e	e	.	.	.	.	.	.	.	.	.	.	.	.	.
gene11005	rab19.L	rab19	L	X	.	.	.	.	.	.	.	.	.	.	.	.	.	.	.	.	.	.	.	.	.	.	.	.
gene11006	fxr1.S	fxr1	LS	X	.	.	X	X	U	.	i	i	.	i	ei	.	.	i	.	.	.	.	.	.	.	.	.	.
gene11007	.	.	.	.	.	.	.	.	.	.	.	.	.	.	.	.	.	.	.	.	.	.	.	.	.	.	.	.
gene11008	eci1.L	eci1	LS	X	.	.	.	.	.	.	.	.	.	.	.	.	.	.	.	.	.	.	.	.	.	.	.	.
gene11009	jag1.L	jag1	LS	X	.	X	X	X	.	D	i	i	.	i	ei	i	.	.	.	.	.	.	i	.	i	.	i	.
gene1101	lmo7.S	lmo7	LS	X	.	.	.	.	.	.	.	.	.	.	.	.	.	.	.	.	.	.	.	.	.	.	.	.
gene11010	lnpep.L	lnpep	LS	X	.	.	.	.	.	.	.	.	.	.	.	.	.	.	.	.	.	.	.	.	.	.	.	.
gene11011	mgc75760.L	mgc75760	L	X	.	.	.	.	.	U	.	.	.	.	.	.	.	.	.	.	.	.	.	.	.	.	.	e
gene11012	tomm40l.S	tomm40l	S	X	.	.	.	X	.	.	.	.	.	.	e	.	.	.	.	.	.	.	.	.	.	.	.	.
gene11013	cabp1.L	cabp1	LS	X	.	.	.	.	.	.	.	.	.	.	.	.	.	.	.	.	.	.	.	.	.	.	.	.
gene11014	kcnj16.S	kcnj16	LS	.	.	.	.	.	.	.	.	.	.	.	.	.	.	.	.	.	.	.	.	.	.	.	.	.
gene11015	alox5ap.L	alox5ap	LS	.	.	.	.	.	.	.	.	.	.	.	.	.	.	.	.	.	.	.	.	.	.	.	.	.
gene11016	pgam5.S	pgam5	LS	X	.	.	.	.	.	.	.	.	.	.	.	.	.	.	.	.	.	.	.	.	.	.	.	.
gene11017	.	.	.	.	.	.	.	.	.	.	.	.	.	.	.	.	.	.	.	.	.	.	.	.	.	.	.	.
gene11018	pdcd6.L	pdcd6	L	X	.	.	.	.	.	.	.	.	.	.	.	.	.	.	.	.	.	.	.	.	.	.	.	.
gene11019	tmem50a.L	tmem50a	LS	X	.	.	X	X	U	.	i	i	.	i	i	.	.	i	.	.	.	.	.	.	.	.	.	.
gene1102	gpc5.S	gpc5	LS	X	.	.	.	.	.	.	.	.	.	.	.	.	.	.	.	.	.	.	.	.	.	.	.	.
gene11020	mapkapk3.L	mapkapk3	LS	.	.	.	.	.	.	.	.	.	.	.	.	.	.	.	.	.	.	.	.	.	.	.	.	.
gene11021	cd302.S	cd302	S	.	.	.	.	.	.	.	.	.	.	.	.	.	.	.	.	.	.	.	.	.	.	.	.	.
gene11022	sardh.L	sardh	L	X	.	.	.	.	.	.	.	.	.	.	.	.	.	.	.	.	.	.	.	.	.	.	.	.
gene11023	fadd.S	fadd	LS	X	.	.	.	.	.	.	.	.	.	.	.	.	.	.	.	.	.	.	.	.	.	.	.	.
gene11024	.	.	.	.	.	.	.	.	.	.	.	.	.	.	.	.	.	.	.	.	.	.	.	.	.	.	.	.
gene11025	ptdss2.S	ptdss2	LS	X	.	.	.	.	.	.	.	.	.	.	.	.	.	.	.	.	.	.	.	.	.	.	.	.
gene11026	gdf9.S	gdf9	LS	X	.	.	.	.	.	.	.	.	.	.	.	.	.	.	.	.	.	.	.	.	.	.	.	.
gene11027	XB22065601.L [provisional]	XB22065601 [provisional]	L	X	.	.	.	.	.	D	.	.	.	.	.	.	.	.	.	.	.	.	.	.	.	.	e	.
gene11028	rnft2.L	rnft2	LS	X	.	.	.	.	.	.	.	.	.	.	.	.	.	.	.	.	.	.	.	.	.	.	.	.
gene11029	grk6.L	grk6	LS	X	.	.	.	.	.	.	.	.	.	.	.	.	.	.	.	.	.	.	.	.	.	.	.	.
gene1103	.	.	.	.	.	.	.	.	.	.	.	.	.	.	.	.	.	.	.	.	.	.	.	.	.	.	.	.
gene11030	fam110a.L	fam110a	LS	X	.	.	.	.	.	.	.	.	.	.	.	.	.	.	.	.	.	.	.	.	.	.	.	.
gene11031	dnaja4.1.L	dnaja4.1	L	X	.	.	.	.	.	.	.	.	.	.	.	.	.	.	.	.	.	.	.	.	.	.	.	.
gene11032	prl.1.L	prl.1	LS	X	.	.	.	.	.	D	.	.	e	.	.	.	.	.	.	.	.	.	.	.	.	.	e	.
gene11033	fam110d.S	fam110d	LS	.	.	.	.	.	.	.	.	.	.	.	.	.	.	.	.	.	.	.	.	.	.	.	.	.
gene11034	tada1.L	tada1	L	X	.	.	.	.	.	.	.	.	.	.	.	.	.	.	.	.	.	.	.	.	.	.	.	.
gene11035	csk.S	csk	LS	X	.	.	.	.	.	.	.	.	.	.	.	.	.	.	.	.	.	.	.	.	.	.	.	.
gene11036	styxl2.S	styxl2	LS	.	.	.	.	.	.	.	.	.	.	.	.	.	.	.	.	.	.	.	.	.	.	.	.	.
gene11037	atad1.S	atad1	LS	X	.	.	.	.	.	.	.	.	.	.	.	.	.	.	.	.	.	.	.	.	.	.	.	.
gene11038	cdkn2b.L	cdkn2b	LS	.	.	.	.	.	.	.	.	.	.	.	.	.	.	.	.	.	.	.	.	.	.	.	.	.
gene11039	bicral.L	bicral	LS	.	.	.	.	.	.	.	.	.	.	.	.	.	.	.	.	.	.	.	.	.	.	.	.	.
gene1104	crat.S	crat	LS	X	.	.	.	.	.	.	.	.	.	.	.	.	.	.	.	.	.	.	.	.	.	.	.	.
gene11040	cacfd1.S	cacfd1	S	X	.	.	.	.	.	.	.	.	.	.	.	.	.	.	.	.	.	.	.	.	.	.	.	.
gene11041	proser1.S	proser1	LS	.	X	.	X	X	.	.	ei	ei	e	ei	ei	.	.	.	.	.	.	.	.	.	.	.	.	.
gene11042	crygdl.24.L	crygdl.24	L	.	.	.	.	.	.	.	.	.	.	.	.	.	.	.	.	.	.	.	.	.	.	.	.	.
gene11043	ferd3l.L	ferd3l	LS	.	.	.	.	.	.	.	.	.	.	.	.	.	.	.	.	.	.	.	.	.	.	.	.	.
gene11044	poldip3.S	poldip3	LS	X	.	X	X	X	U	.	i	i	.	i	i	i	.	i	.	.	.	.	.	.	.	.	.	.
gene11045	rnf157.L	rnf157	LS	X	.	.	.	.	.	.	.	.	.	.	.	.	.	.	.	.	.	.	.	.	.	.	.	.
gene11046	chst12.L	chst12	LS	X	.	.	.	.	.	.	.	.	.	.	.	.	.	.	.	.	.	.	.	.	.	.	.	.
gene11047	sort1.S	sort1	S	X	.	.	.	.	.	.	.	.	.	.	.	.	.	.	.	.	.	.	.	.	.	.	.	.
gene11048	nus1.L	nus1	LS	X	.	.	.	.	.	.	.	.	.	.	.	.	.	.	.	.	.	.	.	.	.	.	.	.
gene11049	.	.	.	X	.	X	X	X	U	D	ei	ei	.	i	ei	ei	.	i	.	i	.	ei	.	.	i	.	.	.
gene1105	.	.	.	.	.	.	.	.	.	.	.	.	.	.	.	.	.	.	.	.	.	.	.	.	.	.	.	.
gene11050	.	.	.	.	.	.	.	.	.	.	.	.	.	.	.	.	.	.	.	.	.	.	.	.	.	.	.	.
gene11051	slain2l.S	slain2l	LS	X	.	.	.	.	.	.	.	.	.	.	.	.	.	.	.	.	.	.	.	.	.	.	.	.
gene11052	ncl.S	ncl	LS	X	X	X	X	X	U	D	i	i	i	i	ei	i	.	i	.	.	.	.	.	.	i	.	.	.
gene11053	.	.	.	.	.	.	.	.	.	.	.	.	.	.	.	.	.	.	.	.	.	.	.	.	.	.	.	.
gene11054	marchf5.L	marchf5	LS	X	.	.	.	.	.	.	.	.	.	.	.	.	.	.	.	.	.	.	.	.	.	.	.	.
gene11055	slc25a22.L	slc25a22	LS	.	.	.	.	X	.	.	.	.	.	.	e	.	.	.	.	.	.	.	.	.	.	.	.	.
gene11056	akr1d1.S	akr1d1	LS	.	.	.	.	.	.	.	.	.	.	.	.	.	.	.	.	.	.	.	.	.	.	.	.	.
gene11057	snx27.L	snx27	LS	X	.	.	X	X	U	.	i	i	.	i	ei	.	.	i	.	.	.	.	.	.	.	.	.	.
gene11058	pabpn1.S	pabpn1	LS	X	X	X	X	X	U	D	i	i	i	i	e	i	.	i	.	i	.	i	.	.	i	.	.	.
gene11059	msl2.S	msl2	LS	X	.	X	X	X	U	D	i	i	.	i	e	i	.	i	.	.	.	.	.	.	i	.	.	.
gene1106	stk24.S	stk24	LS	X	.	.	.	.	.	.	.	.	.	.	.	.	.	.	.	.	.	.	.	.	.	.	.	.
gene11060	taf12.L	taf12	LS	X	.	.	X	.	D	.	i	i	.	i	.	.	.	.	.	.	e	.	.	.	.	.	.	.
gene11061	frs3.S	frs3	LS	X	.	.	.	.	D	.	.	.	.	.	.	.	.	.	.	.	e	.	.	.	.	.	.	.
gene11062	fbxw8.L	fbxw8	L	X	.	.	.	.	.	.	.	.	.	.	.	.	.	.	.	.	.	.	.	.	.	.	.	.
gene11063	bcs1l.L	bcs1l	L	X	.	.	.	X	.	.	.	.	.	.	e	.	.	.	.	.	.	.	.	.	.	.	.	.
gene11064	.	.	.	X	.	.	.	X	.	.	.	.	.	.	e	.	.	.	.	.	.	.	.	.	.	.	.	.
gene11065	lancl1.S	lancl1	LS	.	.	.	.	.	.	.	.	.	.	.	.	.	.	.	.	.	.	.	.	.	.	.	.	.
gene11066	odr4.L	odr4	L	X	.	.	.	X	.	.	.	.	.	.	e	.	.	.	.	.	.	.	.	.	.	.	.	.
gene11067	cmtm6.L	cmtm6	LS	X	.	.	.	.	.	.	.	.	.	.	.	.	.	.	.	.	.	.	.	.	.	.	.	.
gene11068	pga4.L	pga4	L	.	.	.	.	.	.	.	.	.	.	.	.	.	.	.	.	.	.	.	.	.	.	.	.	.
gene11069	cdk18.L	cdk18	LS	.	.	.	.	.	.	.	.	.	.	e	.	.	.	.	.	.	.	.	.	.	.	.	.	.
gene1107	cox5a.L	cox5a	LS	X	.	.	.	.	.	.	i	.	.	i	.	.	.	.	.	.	.	.	.	.	.	.	.	.
gene11070	XB5992952.L [provisional:adpgk]	XB5992952 [provisional:adpgk]	L	X	.	.	.	.	.	.	.	.	.	.	.	.	.	.	.	.	.	.	.	.	.	.	.	.
gene11071	stard10.L	stard10	LS	X	.	.	.	X	U	.	.	.	e	.	e	.	.	.	.	.	.	e	.	.	.	.	.	.
gene11072	igfbp1.S	igfbp1	LS	.	.	.	.	.	.	.	.	.	.	.	.	.	.	.	.	.	.	.	.	.	.	.	.	.
gene11073	rassf6.L	rassf6	LS	.	.	.	.	.	.	D	.	.	.	e	.	e	.	.	.	.	.	.	.	.	.	.	e	.
gene11074	paqr6.L	paqr6	LS	.	.	.	.	.	.	.	.	.	.	.	.	.	.	.	.	.	.	.	.	.	.	.	.	.
gene11075	col4a5.L	col4a5	LS	.	.	.	.	.	.	.	.	.	.	e	.	.	.	.	.	.	.	.	.	.	.	.	.	.
gene11076	ndufb7.L	ndufb7	LS	X	.	.	.	.	.	.	.	.	.	.	.	.	.	.	.	.	.	.	.	.	.	.	.	.
gene11077	strap.L	strap	LS	X	.	.	.	.	.	.	.	.	.	.	.	.	.	.	.	.	.	.	.	.	.	.	.	.
gene11078	acbd3.S	acbd3	LS	X	.	X	X	X	U	.	i	i	.	i	e	i	.	i	.	i	.	i	.	.	.	.	.	.
gene11079	sorbs1.L	sorbs1	L	X	.	.	.	.	.	.	.	.	.	.	.	.	.	.	.	.	.	.	.	.	.	.	.	.
gene1108	ier3ip1.S	ier3ip1	LS	X	.	.	.	.	.	.	.	.	.	.	.	.	.	.	.	.	.	.	.	.	.	.	.	.
gene11080	sync.S	sync	LS	.	.	.	.	.	.	.	.	.	.	.	.	.	.	.	.	.	.	.	.	.	.	.	.	.
gene11081	slc16a13.L	slc16a13	L	.	.	.	.	.	.	.	.	.	.	.	.	.	.	.	.	.	.	.	.	.	.	.	.	.
gene11082	pxn.S	pxn	LS	X	X	X	X	.	U	.	i	i	i	i	.	i	.	i	.	.	.	.	.	.	.	.	.	.
gene11083	cfd.L	cfd	L	.	.	.	.	.	.	.	.	.	.	.	.	.	.	.	.	.	.	.	.	.	.	.	.	.
gene11084	.	.	.	.	.	.	.	.	.	.	.	.	.	.	.	.	.	.	.	.	.	.	.	.	.	.	.	.
gene11085	.	.	.	.	.	.	.	.	.	.	.	.	.	.	.	.	.	.	.	.	.	.	.	.	.	.	.	.
gene11086	.	.	.	X	.	.	.	.	.	.	.	.	.	.	.	.	.	.	.	.	.	.	.	.	.	.	.	.
gene11087	.	.	.	.	.	.	.	X	.	U	.	.	.	.	e	.	.	.	.	.	.	.	.	.	.	.	.	e
gene11088	.	.	.	.	.	.	.	.	.	.	.	.	.	.	.	.	.	.	.	.	.	.	.	.	.	.	.	.
gene11089	ckap4.L	ckap4	LS	X	.	.	.	X	.	.	.	.	e	e	e	.	.	.	.	.	.	.	.	.	.	.	.	.
gene1109	dcun1d1.L	dcun1d1	LS	X	.	.	.	.	.	.	.	.	.	.	.	.	.	.	.	.	.	.	.	.	.	.	.	.
gene11090	hnrnpc.L	hnrnpc	LS	X	X	X	X	.	D	D	i	i	i	i	.	i	i	.	i	.	i	.	.	.	i	.	.	.
gene11091	fam161b.S	fam161b	S	X	.	.	.	.	.	.	.	.	.	.	.	.	.	.	.	.	.	.	.	.	.	.	.	.
gene11092	sc5d.S	sc5d	LS	X	.	.	.	.	.	U	.	.	.	.	.	.	.	.	.	.	.	.	.	.	.	.	.	e
gene11093	mmrn1.L	mmrn1	L	.	.	.	.	.	.	.	.	.	.	.	.	.	.	.	.	.	.	.	.	.	.	.	.	.
gene11094	hspb8.L	hspb8	LS	.	.	.	.	.	.	.	.	.	.	.	.	.	.	.	.	.	.	.	.	.	.	.	.	.
gene11095	.	.	.	.	.	.	.	.	.	.	.	.	.	.	.	.	.	.	.	.	.	.	.	.	.	.	.	.
gene11096	znf383.S	znf383	S	X	.	.	.	.	.	.	.	.	.	.	.	.	.	.	.	.	.	.	.	.	.	.	.	.
gene11097	cebpe.L	cebpe	LS	.	.	.	.	.	.	.	.	.	.	.	.	.	.	.	.	.	.	.	.	.	.	.	.	.
gene11098	hmgb1.L	hmgb1	L	X	X	X	X	X	.	D	i	i	i	i	e	i	.	.	.	.	.	.	.	.	i	.	i	.
gene11099	ing3.L	ing3	LS	X	.	.	.	.	.	.	.	.	.	.	.	.	.	.	.	.	.	.	.	.	.	.	.	.
gene111	trim32l.S	trim32l	S	.	.	.	.	.	.	.	.	.	.	.	.	.	.	.	.	.	.	.	.	.	.	.	.	.
gene1110	gatd3alc.2.L	gatd3alc.2	L	X	.	.	.	X	.	U	.	.	.	.	e	.	.	.	.	.	.	.	.	.	.	.	.	e
gene11100	.	.	.	X	.	.	.	.	.	.	.	.	.	.	.	.	.	.	.	.	.	.	.	.	.	.	.	.
gene11101	lrg1.L	lrg1	L	.	.	.	.	.	.	.	.	.	.	.	.	.	.	.	.	.	.	.	.	.	.	.	.	.
gene11102	foxj2.L	foxj2	LS	X	.	.	.	.	.	U	.	.	.	.	.	.	.	.	.	.	.	.	.	.	.	.	.	e
gene11103	ercc6l.L	ercc6l	L	X	.	.	.	.	.	.	i	.	.	i	.	.	.	.	.	.	.	.	.	.	.	.	.	.
gene11104	.	.	.	X	.	.	.	.	.	D	.	.	.	.	.	.	.	.	.	.	.	.	.	.	.	.	e	.
gene11105	dnajc19.L	dnajc19	L	X	.	.	X	.	U	.	i	i	.	i	.	.	.	.	.	.	.	i	.	.	.	.	.	.
gene11106	foxe1.S	foxe1	LS	.	.	.	.	.	.	.	.	.	.	.	.	.	.	.	.	.	.	.	.	.	.	.	.	.
gene11107	spata4.L	spata4	L	X	.	.	.	X	.	U	.	.	.	.	e	.	.	.	.	.	.	.	.	.	.	.	.	e
gene11108	ahnak.L	ahnak	LS	X	X	X	X	X	U	D	i	i	i	i	ei	i	.	i	.	.	.	.	i	.	i	.	i	.
gene11109	lrrc15.L	lrrc15	LS	.	.	.	.	.	.	.	.	.	.	.	.	.	.	.	.	.	.	.	.	.	.	.	.	.
gene1111	rnf125.L	rnf125	LS	.	.	.	.	.	.	.	.	.	.	.	.	.	.	.	.	.	.	.	.	.	.	.	.	.
gene11110	dvl1.L	dvl1	L	.	.	.	.	.	.	.	.	.	.	.	.	.	.	.	.	.	.	.	.	.	.	.	.	.
gene11111	alpl.S	alpl	LS	.	.	.	.	.	.	.	.	.	.	.	.	.	.	.	.	.	.	.	.	.	.	.	.	.
gene11112	aopep.L	aopep	L	X	.	.	.	.	.	.	.	.	.	.	.	.	.	.	.	.	.	.	.	.	.	.	.	.
gene11113	csrnp1.S	csrnp1	LS	X	X	X	X	X	U	D	i	i	ei	i	i	i	.	i	.	.	.	i	.	.	i	.	.	.
gene11114	sall4.L	sall4	LS	X	X	.	X	.	D	.	i	i	i	i	.	.	i	.	i	.	i	.	.	.	.	.	.	.
gene11115	.	.	.	.	.	.	.	.	.	.	.	.	.	.	.	.	.	.	.	.	.	.	.	.	.	.	.	.
gene11116	ikbkg.L	ikbkg	L	X	.	.	.	.	.	.	.	i	i	i	.	.	.	.	.	.	.	.	.	.	.	.	.	.
gene11117	fam189a2.L	fam189a2	LS	X	.	.	.	.	.	.	.	.	.	.	.	.	.	.	.	.	.	.	.	.	.	.	.	.
gene11118	cebpa.S	cebpa	LS	X	.	.	.	X	U	.	.	.	.	.	e	.	.	.	.	.	.	.	.	.	.	.	.	.
gene11119	atp13a5.L	atp13a5	L	.	.	.	.	.	.	.	.	.	.	.	.	.	.	.	.	.	.	.	.	.	.	.	.	.
gene1112	yars1.S	yars1	LS	X	.	.	.	.	.	.	.	.	.	.	.	.	.	.	.	.	.	.	.	.	.	.	.	.
gene11120	tnfrsf12a.S	tnfrsf12a	LS	.	.	.	.	.	.	.	.	.	.	.	.	.	.	.	.	.	.	.	.	.	.	.	.	.
gene11121	mafb.L	mafb	LS	.	.	X	X	.	.	.	e	e	.	e	.	e	.	.	.	.	.	.	.	.	.	.	.	.
gene11122	ptger1.L	ptger1	L	.	.	.	.	.	.	.	.	.	.	.	.	.	.	.	.	.	.	.	.	.	.	.	.	.
gene11123	.	.	.	X	.	.	.	X	.	.	.	.	i	.	i	.	.	.	.	.	.	.	.	.	.	.	.	.
gene11124	susd2.L	susd2	LS	X	.	.	.	X	.	.	.	.	.	.	e	.	.	.	.	.	.	.	.	.	.	.	.	.
gene11125	.	.	.	.	.	.	.	.	.	.	.	.	.	.	.	.	.	.	.	.	.	.	.	.	.	.	.	.
gene11126	.	.	.	.	.	.	.	.	.	.	.	.	.	.	.	.	.	.	.	.	.	.	.	.	.	.	.	.
gene11127	nr3c1.L	nr3c1	LS	X	.	.	.	.	.	.	.	.	.	.	.	.	.	.	.	.	.	.	.	.	.	.	.	.
gene11128	erbb3.S	erbb3	LS	.	.	.	.	X	.	.	.	.	e	e	e	.	.	.	.	.	.	.	.	.	.	.	.	.
gene11129	chrm2.L	chrm2	LS	.	.	.	.	.	.	.	.	.	.	.	.	.	.	.	.	.	.	.	.	.	.	.	.	.
gene1113	rs1.S	rs1	LS	.	.	.	.	.	.	.	.	.	.	.	.	.	.	.	.	.	.	.	.	.	.	.	.	.
gene11130	nkx2-5.L	nkx2-5	LS	.	.	.	.	.	.	.	.	.	.	.	.	.	.	.	.	.	.	.	.	.	.	.	.	.
gene11131	osgepl1.L	osgepl1	L	X	.	.	.	.	.	.	.	.	.	.	.	.	.	.	.	.	.	.	.	.	.	.	.	.
gene11132	gpatch8.L	gpatch8	LS	.	.	.	.	X	.	.	.	.	.	.	e	.	.	.	.	.	.	.	.	.	.	.	.	.
gene11133	glra1.S	glra1	S	.	.	.	.	.	.	.	.	.	.	.	.	.	.	.	.	.	.	.	.	.	.	.	.	.
gene11134	gsto1.S	gsto1	S	X	.	.	.	X	.	D	.	.	.	.	e	.	.	.	.	.	.	.	.	.	.	.	e	.
gene11135	fam110c.L	fam110c	LS	X	X	X	X	.	.	.	e	e	e	e	.	e	.	.	.	.	.	.	.	.	.	.	.	.
gene11136	klf15.L	klf15	LS	.	.	.	.	.	.	.	.	.	e	e	.	.	.	.	.	.	.	.	.	.	.	.	.	.
gene11137	tmco1.S	tmco1	S	X	.	.	X	X	.	.	i	i	.	i	ei	.	.	.	.	.	.	.	.	.	.	.	.	.
gene11138	tmem229bl.L	tmem229bl	LS	.	.	.	.	.	.	.	.	.	.	.	.	.	.	.	.	.	.	.	.	.	.	.	.	.
gene11139	skap1.S	skap1	S	X	.	.	.	.	.	.	.	.	.	.	.	.	.	.	.	.	.	.	.	.	.	.	.	.
gene1114	pgam1.S	pgam1	LS	X	.	.	.	.	.	.	.	.	.	.	.	.	.	.	.	.	.	.	.	.	.	.	.	.
gene11140	pak5.S	pak5	LS	.	.	.	.	.	.	U	.	.	e	.	.	.	.	.	.	.	.	.	.	.	.	.	.	e
gene11141	vps33b.L	vps33b	L	X	.	.	.	.	.	.	.	.	.	.	.	.	.	.	.	.	.	.	.	.	.	.	.	.
gene11142	.	.	.	.	.	.	.	.	.	.	.	.	.	.	.	.	.	.	.	.	.	.	.	.	.	.	.	.
gene11143	plpp6.L	plpp6	LS	X	.	.	.	.	.	.	.	.	.	.	.	.	.	.	.	.	.	.	.	.	.	.	.	.
gene11144	ndufa11.S	ndufa11	LS	X	.	.	.	.	.	.	.	.	.	.	.	.	.	.	.	.	.	.	.	.	.	.	.	.
gene11145	mosmo.L	mosmo	LS	X	.	X	X	.	U	D	i	i	.	i	.	i	.	i	.	.	.	.	.	.	i	.	.	.
gene11146	metap1.L	metap1	LS	X	.	.	.	.	.	.	.	.	.	.	.	.	.	.	.	.	.	.	.	.	.	.	.	.
gene11147	.	.	.	.	.	.	.	.	.	.	.	.	.	.	.	.	.	.	.	.	.	.	.	.	.	.	.	.
gene11148	npm3.L	npm3	LS	X	.	X	X	.	.	.	i	i	.	i	.	i	.	.	.	.	.	.	.	.	.	.	.	.
gene11149	tpt1.L	tpt1	L	X	.	X	X	X	U	D	i	i	.	i	e	i	.	i	.	i	.	i	.	.	i	.	.	.
gene1115	yipf3.L	yipf3	LS	X	.	.	.	.	.	.	.	.	.	.	.	.	.	.	.	.	.	.	.	.	.	.	.	.
gene11150	.	.	.	X	.	.	.	.	.	.	.	.	.	.	.	.	.	.	.	.	.	.	.	.	.	.	.	.
gene11151	XB5994047.L [provisional]	XB5994047 [provisional]	L	X	.	.	.	.	.	.	.	.	.	.	.	.	.	.	.	.	.	.	.	.	.	.	.	.
gene11152	abo.6.L	abo.6	LS	.	.	.	.	.	.	.	.	.	.	.	.	.	.	.	.	.	.	.	.	.	.	.	.	.
gene11153	kcnq1.L	kcnq1	LS	X	.	.	.	X	.	.	.	.	.	.	e	.	.	.	.	.	.	.	.	.	.	.	.	.
gene11154	slurp1l.S	slurp1l	S	.	.	.	.	.	.	.	.	.	.	.	.	.	.	.	.	.	.	.	.	.	.	.	.	.
gene11155	gnat1.L	gnat1	LS	.	.	.	.	.	.	.	.	.	.	.	.	.	.	.	.	.	.	.	.	.	.	.	.	.
gene11156	smurf1.L	smurf1	LS	X	X	.	X	X	U	.	i	i	i	i	i	.	.	i	.	i	.	i	.	.	.	.	.	.
gene11157	pltp.L	pltp	LS	.	.	.	.	.	.	.	.	.	.	.	.	.	.	.	.	.	.	.	.	.	.	.	.	.
gene11158	pdcd1.L	pdcd1	LS	.	.	.	.	.	.	.	.	.	.	.	.	.	.	.	.	.	.	.	.	.	.	.	.	.
gene11159	znf469.S	znf469	LS	.	.	.	.	.	.	U	.	.	e	e	.	.	.	.	.	.	.	.	.	.	.	.	.	e
gene1116	tmprss4.L	tmprss4	LS	X	.	.	.	X	.	.	.	.	.	.	e	.	.	.	.	.	.	.	.	.	.	.	.	.
gene11160	rcc1.L	rcc1	LS	X	.	.	X	X	U	.	i	i	.	i	i	.	.	i	.	.	.	.	.	.	.	.	.	.
gene11161	abcb6.L	abcb6	L	X	.	.	.	.	.	.	.	.	.	.	.	.	.	.	.	.	.	.	.	.	.	.	.	.
gene11162	cdk1.L	cdk1	LS	X	.	X	X	X	D	.	i	i	.	i	i	ei	.	.	.	.	e	i	.	.	.	.	.	.
gene11163	znf318.S	znf318	LS	X	.	.	.	.	.	.	.	.	.	.	.	.	.	.	.	.	.	.	.	.	.	.	.	.
gene11164	tspear.S	tspear	S	.	.	.	.	.	.	.	.	.	.	.	.	.	.	.	.	.	.	.	.	.	.	.	.	.
gene11165	daam2.S	daam2	S	.	.	.	.	.	.	.	.	.	.	.	.	.	.	.	.	.	.	.	.	.	.	.	.	.
gene11166	qars1.L	qars1	LS	X	.	.	.	.	.	.	.	.	.	.	.	.	.	.	.	.	.	.	.	.	.	.	.	.
gene11167	psmd3.L	psmd3	LS	X	.	.	.	.	.	.	.	.	.	.	.	.	.	.	.	.	.	.	.	.	.	.	.	.
gene11168	slc22a18.L	slc22a18	L	.	.	.	.	.	.	.	.	.	.	.	.	.	.	.	.	.	.	.	.	.	.	.	.	.
gene11169	cda.S	cda	LS	.	.	.	.	.	.	.	.	.	.	.	.	.	.	.	.	.	.	.	.	.	.	.	.	.
gene1117	olig4.L	olig4	LS	.	.	.	.	.	.	.	.	.	.	.	.	.	.	.	.	.	.	.	.	.	.	.	.	.
gene11170	cenpu.L	cenpu	L	X	.	.	.	.	.	.	.	.	.	e	.	.	.	.	.	.	.	.	.	.	.	.	.	.
gene11171	fam53c.L	fam53c	LS	X	.	.	.	.	.	.	.	.	.	e	.	.	.	.	.	.	.	.	.	.	.	.	.	.
gene11172	stk32a.L	stk32a	LS	.	.	.	.	.	.	.	.	.	.	.	.	.	.	.	.	.	.	.	.	.	.	.	.	.
gene11173	.	.	.	.	.	.	.	.	.	.	.	.	.	.	.	.	.	.	.	.	.	.	.	.	.	.	.	.
gene11174	urpta-1.S	urpta-1	LS	.	.	.	.	.	.	.	.	.	.	.	.	.	.	.	.	.	.	.	.	.	.	.	.	.
gene11175	eif2b3.L	eif2b3	L	X	.	.	.	.	.	.	.	.	.	.	.	.	.	.	.	.	.	.	.	.	.	.	.	.
gene11176	msh4.L	msh4	L	.	.	.	.	.	.	.	.	.	.	.	.	.	.	.	.	.	.	.	.	.	.	.	.	.
gene11177	exosc8.L	exosc8	LS	.	.	.	.	.	.	.	.	.	.	e	.	.	.	.	.	.	.	.	.	.	.	.	.	.
gene11178	foxn2.S	foxn2	LS	X	X	X	X	.	.	D	i	i	i	i	.	i	.	.	.	.	.	.	.	.	i	.	.	.
gene11179	n4bp1.L	n4bp1	LS	X	.	.	X	X	U	.	i	i	.	i	i	.	.	.	.	i	.	i	.	.	.	.	.	.
gene1118	kti12.L	kti12	L	X	.	.	.	.	.	.	.	.	.	.	.	.	.	.	.	.	.	.	.	.	.	.	.	.
gene11180	mgc145260.S	mgc145260	LS	X	.	.	.	.	.	.	.	.	.	.	.	.	.	.	.	.	.	.	.	.	.	.	.	.
gene11181	.	.	.	.	.	.	.	.	.	.	.	.	.	.	.	.	.	.	.	.	.	.	.	.	.	.	.	.
gene11182	ggt1.S	ggt1	LS	.	.	.	.	X	.	.	.	.	.	.	e	.	.	.	.	.	.	.	.	.	.	.	.	.
gene11183	kiaa0319l.S	kiaa0319l	LS	X	.	.	.	.	.	.	.	.	.	.	.	.	.	.	.	.	.	.	.	.	.	.	.	.
gene11184	spic.S	spic	LS	.	.	.	.	.	.	.	.	.	.	.	.	.	.	.	.	.	.	.	.	.	.	.	.	.
gene11185	syndig1.L	syndig1	LS	.	.	.	.	.	.	.	.	.	.	.	.	.	.	.	.	.	.	.	.	.	.	.	.	.
gene11186	cinp.L	cinp	LS	X	.	.	X	.	.	.	i	i	.	i	.	.	.	.	.	.	.	.	.	.	.	.	.	.
gene11187	.	.	.	.	.	X	X	.	.	D	ei	i	.	i	.	i	.	.	.	.	.	.	.	.	.	.	i	.
gene11188	rpa2.L	rpa2	LS	X	.	.	X	X	.	.	i	i	.	i	i	.	.	.	.	.	.	.	.	.	.	.	.	.
gene11189	mgat4c.L	mgat4c	LS	.	.	.	.	.	.	.	.	.	.	.	.	.	.	.	.	.	.	.	.	.	.	.	.	.
gene1119	ggt7.L	ggt7	LS	.	.	.	.	X	.	U	.	.	.	.	e	.	.	.	.	.	.	.	.	.	.	.	.	e
gene11190	sfmbt2.S	sfmbt2	LS	.	.	.	.	X	.	.	.	.	e	e	e	.	.	.	.	.	.	.	.	.	.	.	.	.
gene11191	c15orf61.L	c15orf61	L	X	.	.	.	.	.	.	.	.	.	.	.	.	.	.	.	.	.	.	.	.	.	.	.	.
gene11192	ddx51.L	ddx51	L	X	.	.	.	.	.	.	.	.	.	.	.	.	.	.	.	.	.	.	.	.	.	.	.	.
gene11193	nrde2.L	nrde2	L	X	.	.	.	.	.	.	.	.	.	.	.	.	.	.	.	.	.	.	.	.	.	.	.	.
gene11194	wnt11.L	wnt11	LS	.	.	.	.	.	.	.	.	.	.	.	.	.	.	.	.	.	.	.	.	.	.	.	.	.
gene11195	cdc42ep2.S	cdc42ep2	LS	X	.	.	.	.	.	.	.	.	e	e	.	.	.	.	.	.	.	.	.	.	.	.	.	.
gene11196	cenph.L	cenph	L	X	X	.	X	X	U	D	i	i	i	i	i	.	.	.	.	i	.	i	.	.	i	.	.	.
gene11197	col4a5.S	col4a5	LS	.	.	.	.	.	.	.	.	.	.	.	.	.	.	.	.	.	.	.	.	.	.	.	.	.
gene11198	fam53a.S	fam53a	LS	X	.	.	.	.	.	.	.	.	.	.	.	.	.	.	.	.	.	.	.	.	.	.	.	.
gene11199	tdrd15.S	tdrd15	LS	X	.	.	.	.	.	U	.	.	.	.	.	.	.	.	.	.	.	.	.	.	.	.	.	e
gene112	spx1.S	spx1	LS	.	.	.	.	.	.	.	.	.	.	.	.	.	.	.	.	.	.	.	.	.	.	.	.	.
gene1120	eif3a.L	eif3a	LS	X	X	X	X	X	U	D	i	i	i	i	ei	i	.	i	.	i	.	.	.	.	i	.	.	.
gene11200	rnf4.S	rnf4	LS	X	.	.	.	.	.	.	.	.	.	.	.	.	.	.	.	.	.	.	.	.	.	.	.	.
gene11201	.	.	.	X	.	.	.	.	.	.	.	.	.	.	.	.	.	.	.	.	.	.	.	.	.	.	.	.
gene11202	snph.S	snph	LS	X	.	.	.	.	.	.	.	.	.	.	.	.	.	.	.	.	.	.	.	.	.	.	.	.
gene11203	mex3d.S	mex3d	LS	X	.	.	.	.	.	.	.	.	.	.	.	.	.	.	.	.	.	.	.	.	.	.	.	.
gene11204	cyb5r4.L	cyb5r4	LS	.	.	.	.	.	.	.	.	.	.	e	.	.	.	.	.	.	.	.	.	.	.	.	.	.
gene11205	ptprd.S	ptprd	LS	.	.	.	.	X	.	D	.	.	e	.	e	e	.	.	.	.	.	.	.	.	.	.	e	.
gene11206	spin1.L	spin1	LS	X	.	.	.	.	.	.	.	.	.	.	.	.	.	.	.	.	.	.	.	.	.	.	.	.
gene11207	pafah1b2.S	pafah1b2	LS	X	.	.	.	.	.	.	.	.	.	.	.	.	.	.	.	.	.	.	.	.	.	.	.	.
gene11208	gpr171.L	gpr171	LS	.	.	.	.	.	.	.	.	.	.	.	.	.	.	.	.	.	.	.	.	.	.	.	.	.
gene11209	golm2.S	golm2	LS	X	.	.	X	X	U	.	i	i	.	i	i	.	.	i	.	.	.	i	.	.	.	.	.	.
gene1121	snx7.L	snx7	LS	X	.	.	.	.	.	.	.	.	.	.	.	.	.	.	.	.	.	.	.	.	.	.	.	.
gene11210	efs.S	efs	LS	.	.	X	X	X	.	.	i	i	.	ei	ei	i	.	.	.	.	.	.	.	.	.	.	.	.
gene11211	rrp8.S	rrp8	LS	X	.	.	.	X	U	.	.	.	.	i	i	.	.	.	.	.	.	i	.	.	.	.	.	.
gene11212	mib2.L	mib2	LS	X	.	.	.	.	.	.	.	.	.	.	.	.	.	.	.	.	.	.	.	.	.	.	.	.
gene11213	rgs18.S	rgs18	LS	.	.	.	.	.	.	.	.	.	.	.	.	.	.	.	.	.	.	.	.	.	.	.	.	.
gene11214	.	.	.	.	.	.	.	.	.	.	.	.	.	.	.	.	.	.	.	.	.	.	.	.	.	.	.	.
gene11215	.	.	.	X	.	.	.	.	.	.	.	.	.	.	.	.	.	.	.	.	.	.	.	.	.	.	.	.
gene11216	.	.	.	.	.	.	.	.	.	.	.	.	.	.	.	.	.	.	.	.	.	.	.	.	.	.	.	.
gene11217	wdtc1.L	wdtc1	LS	X	.	.	.	.	.	.	.	.	.	.	.	.	.	.	.	.	.	.	.	.	.	.	.	.
gene11218	zfpl1.S	zfpl1	LS	X	.	.	.	.	.	.	.	.	.	.	.	.	.	.	.	.	.	.	.	.	.	.	.	.
gene11219	pdcd2l.L	pdcd2l	L	X	.	.	.	.	.	.	.	.	.	.	.	.	.	.	.	.	.	.	.	.	.	.	.	.
gene1122	cdc42se2l.L	cdc42se2l	LS	X	.	.	.	X	.	.	.	.	.	e	e	.	.	.	.	.	.	.	.	.	.	.	.	.
gene11220	scel.L	scel	L	.	.	.	.	X	.	.	.	.	.	.	e	.	.	.	.	.	.	.	.	.	.	.	.	.
gene11221	apoh.L	apoh	L	.	.	.	.	.	.	.	.	.	.	.	.	.	.	.	.	.	.	.	.	.	.	.	.	.
gene11222	ambp.L	ambp	LS	.	.	.	.	.	.	.	.	.	.	.	.	.	.	.	.	.	.	.	.	.	.	.	.	.
gene11223	arhgap10.L	arhgap10	LS	X	.	.	.	.	.	.	.	.	.	.	.	.	.	.	.	.	.	.	.	.	.	.	.	.
gene11224	bcorl1.L	bcorl1	LS	X	.	X	X	X	.	D	i	i	.	i	e	i	.	.	.	.	.	.	.	.	i	.	i	.
gene11225	abhd14a.L	abhd14a	LS	X	.	.	.	.	.	.	.	.	.	.	.	.	.	.	.	.	.	.	.	.	.	.	.	.
gene11226	.	.	.	.	.	.	.	.	.	.	.	.	.	.	.	.	.	.	.	.	.	.	.	.	.	.	.	.
gene11227	htr2a.L	htr2a	LS	.	.	.	.	.	.	.	.	.	.	.	.	.	.	.	.	.	.	.	.	.	.	.	.	.
gene11228	nhlh1.S	nhlh1	LS	.	.	.	.	.	.	.	.	.	.	.	.	.	.	.	.	.	.	.	.	.	.	.	.	.
gene11229	acap2.S	acap2	LS	X	.	.	.	.	.	.	.	.	.	.	.	.	.	.	.	.	.	.	.	.	.	.	.	.
gene1123	pan2.L	pan2	LS	X	.	.	.	X	.	D	.	.	.	ei	i	.	.	.	.	.	.	.	.	.	.	.	e	.
gene11230	psmf1.L	psmf1	L	X	.	.	.	.	.	.	.	.	.	.	.	.	.	.	.	.	.	.	.	.	.	.	.	.
gene11231	gfra4.S	gfra4	LS	.	.	.	.	.	.	.	.	.	.	.	.	.	.	.	.	.	.	.	.	.	.	.	.	.
gene11232	frmd6.S	frmd6	LS	X	.	.	.	.	.	D	.	.	.	.	.	.	.	.	.	.	.	.	.	.	.	.	e	.
gene11233	ptprr.S	ptprr	LS	.	.	.	.	.	.	.	.	.	.	.	.	.	.	.	.	.	.	.	.	.	.	.	.	.
gene11234	spred3.S	spred3	LS	X	.	.	.	.	.	U	.	.	.	.	.	.	.	.	.	.	.	.	.	.	.	.	.	e
gene11235	baz2a.L	baz2a	L	X	X	X	X	X	.	D	i	i	i	i	i	i	.	.	.	.	.	.	.	.	i	.	.	.
gene11236	abhd17b.S	abhd17b	LS	X	.	.	.	.	.	.	.	.	.	.	.	.	.	.	.	.	.	.	.	.	.	.	.	.
gene11237	.	.	.	X	.	.	X	X	.	.	ei	ei	.	ei	ei	.	.	.	.	.	.	.	.	.	.	.	.	.
gene11238	smap2.L	smap2	LS	X	.	.	X	X	.	.	i	i	.	i	i	.	.	.	.	.	.	.	.	.	.	.	.	.
gene11239	hmgcs1.S	hmgcs1	LS	X	.	.	.	.	D	.	.	.	.	.	.	.	.	.	.	.	e	.	.	.	.	.	.	.
gene1124	rida.L	rida	LS	X	.	.	.	.	.	.	.	.	.	.	.	.	.	.	.	.	.	.	.	.	.	.	.	.
gene11240	rax2.L	rax2	LS	.	.	.	.	.	.	.	.	.	.	.	.	.	.	.	.	.	.	.	.	.	.	.	.	.
gene11241	ripply2.1.S	ripply2.1	LS	X	.	.	.	X	.	.	.	.	.	.	e	.	.	.	.	.	.	.	.	.	.	.	.	.
gene11242	slc22a4.S	slc22a4	LS	X	.	.	.	.	.	U	.	.	.	.	.	.	.	.	.	.	.	.	.	.	.	.	.	e
gene11243	shpk.L	shpk	LS	X	.	.	.	.	.	D	.	.	.	.	.	.	.	.	.	.	.	.	.	.	.	.	e	.
gene11244	.	.	.	.	.	.	.	.	.	.	.	.	.	.	.	.	.	.	.	.	.	.	.	.	.	.	.	.
gene11245	.	.	.	.	.	.	.	.	.	.	.	.	.	.	.	.	.	.	.	.	.	.	.	.	.	.	.	.
gene11246	isg20l2.S	isg20l2	LS	X	.	.	.	X	.	.	i	.	.	i	e	.	.	.	.	.	.	.	.	.	.	.	.	.
gene11247	pias1.S	pias1	LS	X	.	.	.	.	.	.	.	.	.	.	.	.	.	.	.	.	.	.	.	.	.	.	.	.
gene11248	phlda1.L	phlda1	LS	.	.	.	.	X	.	D	.	.	e	.	e	.	.	.	.	.	.	.	.	.	.	.	e	.
gene11249	ccp110.S	ccp110	LS	X	.	.	.	.	.	.	.	.	.	.	.	.	.	.	.	.	.	.	.	.	.	.	.	.
gene1125	itgb5.L	itgb5	LS	X	.	.	.	.	.	.	.	.	.	.	.	.	.	.	.	.	.	.	.	.	.	.	.	.
gene11250	guk1.S	guk1	LS	X	.	.	X	X	.	.	i	i	.	i	ei	.	.	.	.	.	.	.	.	.	.	.	.	.
gene11251	nr2c1.L	nr2c1	LS	X	.	.	.	.	.	.	.	.	.	.	.	.	.	.	.	.	.	.	.	.	.	.	.	.
gene11252	.	.	.	.	.	.	.	.	.	.	.	.	.	.	.	.	.	.	.	.	.	.	.	.	.	.	.	.
gene11253	ilrun.S	ilrun	S	X	.	.	.	.	.	.	.	.	.	.	.	.	.	.	.	.	.	.	.	.	.	.	.	.
gene11254	.	.	.	.	.	.	.	.	.	.	.	.	.	.	.	.	.	.	.	.	.	.	.	.	.	.	.	.
gene11255	.	.	.	.	.	.	.	.	.	.	.	.	.	.	.	.	.	.	.	.	.	.	.	.	.	.	.	.
gene11256	zfp36l2.1.S	zfp36l2.1	S	X	.	.	.	.	.	.	.	.	.	.	.	e	.	.	.	.	.	.	.	.	.	.	.	.
gene11257	.	.	.	.	.	.	.	X	.	.	.	.	e	.	e	.	.	.	.	.	.	.	.	.	.	.	.	.
gene11258	amdhd1.L	amdhd1	L	X	.	.	.	.	.	.	.	.	.	.	.	.	.	.	.	.	.	.	.	.	.	.	.	.
gene11259	tmem67.S	tmem67	S	X	.	.	.	.	.	.	.	.	.	.	.	.	.	.	.	.	.	.	.	.	.	.	.	.
gene1126	mrtfa.S	mrtfa	LS	X	.	.	.	.	.	.	.	.	.	.	.	.	.	.	.	.	.	.	.	.	.	.	.	.
gene11260	.	.	.	.	.	.	.	.	.	.	.	.	.	.	.	.	.	.	.	.	.	.	.	.	.	.	.	.
gene11261	ttc39c.S	ttc39c	LS	X	.	.	.	.	.	.	.	.	.	.	.	.	.	.	.	.	.	.	.	.	.	.	.	.
gene11262	ell.S	ell	LS	X	.	.	.	.	.	.	.	.	.	.	.	.	.	.	.	.	.	.	.	.	.	.	.	.
gene11263	hck.L	hck	L	X	.	.	.	.	.	.	.	.	.	.	.	.	.	.	.	.	.	.	.	.	.	.	.	.
gene11264	.	.	.	X	.	.	.	.	.	.	.	.	.	.	.	.	.	.	.	.	.	.	.	.	.	.	.	.
gene11265	b9d2.L	b9d2	L	X	.	.	.	.	.	.	.	.	.	.	.	.	.	.	.	.	.	.	.	.	.	.	.	.
gene11266	ldha.L	ldha	LS	X	.	.	.	.	.	D	.	.	.	.	.	.	.	.	.	.	.	.	.	.	.	.	e	.
gene11267	.	.	.	.	.	.	.	.	.	.	.	.	.	.	.	.	.	.	.	.	.	.	.	.	.	.	.	.
gene11268	ptp4a2.L	ptp4a2	LS	X	X	.	X	X	U	.	i	i	i	i	i	.	.	i	.	.	.	.	.	.	.	.	.	.
gene11269	ano6.L	ano6	L	X	.	.	.	.	U	.	.	.	.	.	.	.	.	.	.	.	.	.	.	.	.	.	.	.
gene1127	klf2.L	klf2	LS	X	.	.	X	.	D	.	i	i	.	i	.	.	i	.	i	.	i	.	.	.	.	.	.	.
gene11270	galm.L	galm	L	X	.	.	.	.	.	.	.	.	.	.	.	.	.	.	.	.	.	.	.	.	.	.	.	.
gene11271	sntn.L	sntn	LS	.	.	.	.	.	.	.	.	.	.	.	.	.	.	.	.	.	.	.	.	.	.	.	.	.
gene11272	slc17a5.S	slc17a5	LS	X	.	.	.	X	.	.	.	.	.	.	e	.	.	.	.	.	.	.	.	.	.	.	.	.
gene11273	hspb11.L	hspb11	L	X	.	.	.	.	.	.	.	.	.	.	.	.	.	.	.	.	.	.	.	.	.	.	.	.
gene11274	.	.	.	.	.	X	X	.	.	D	ei	ei	.	ei	.	ei	.	.	.	.	.	.	.	.	i	.	i	.
gene11275	slc25a42.L	slc25a42	LS	X	.	.	.	.	.	.	.	.	.	.	.	.	.	.	.	.	.	.	.	.	.	.	.	.
gene11276	pnpla8.S	pnpla8	LS	.	.	.	.	.	.	.	.	.	.	.	.	.	.	.	.	.	.	.	.	.	.	.	.	.
gene11277	.	.	.	.	.	.	.	X	.	D	.	.	.	.	e	.	.	.	.	.	.	.	.	.	.	.	e	.
gene11278	sash3.S	sash3	LS	.	.	.	.	.	.	.	.	.	.	.	.	.	.	.	.	.	.	.	.	.	.	.	.	.
gene11279	.	.	.	X	.	.	.	.	.	.	.	.	.	.	.	.	.	.	.	.	.	.	.	.	.	.	.	.
gene1128	arhgap1.L	arhgap1	LS	X	.	.	.	.	.	.	.	.	.	.	.	.	.	.	.	.	.	.	.	.	.	.	.	.
gene11280	opa3.S	opa3	LS	X	.	.	.	.	.	D	.	.	.	.	.	.	.	.	.	.	.	.	.	.	.	.	e	.
gene11281	ccs.L	ccs	L	X	.	.	.	.	.	.	.	.	.	.	.	.	.	.	.	.	.	.	.	.	.	.	.	.
gene11282	trim55.L	trim55	LS	.	.	.	.	.	.	.	.	.	.	.	.	.	.	.	.	.	.	.	.	.	.	.	.	.
gene11283	.	.	.	.	.	.	.	.	.	.	.	.	.	.	.	.	.	.	.	.	.	.	.	.	.	.	.	.
gene11284	lpin2.S	lpin2	LS	X	.	.	.	X	.	.	.	.	.	.	e	.	.	.	.	.	.	.	.	.	.	.	.	.
gene11285	cdc73.L	cdc73	LS	X	X	X	X	X	U	.	i	i	i	i	i	i	.	i	.	.	.	.	.	.	.	.	.	.
gene11286	astl2f.S	astl2f	S	.	.	.	.	.	.	.	.	.	.	.	.	.	.	.	.	.	.	.	.	.	.	.	.	.
gene11287	aagab.S	aagab	LS	X	.	.	.	.	.	.	.	.	.	.	.	.	.	.	.	.	.	.	.	.	.	.	.	.
gene11288	casp8ap2.L	casp8ap2	L	X	.	.	.	.	.	.	.	.	.	.	.	.	.	.	.	.	.	.	.	.	.	.	.	.
gene11289	bix1.2.L	bix1.2	LS	.	X	X	X	.	U	D	ei	ei	e	ei	.	ei	.	ei	.	ei	.	.	.	.	.	.	e	.
gene1129	tpd52l2.S	tpd52l2	LS	X	.	.	X	X	U	.	i	i	.	i	ei	.	.	i	.	.	.	i	.	.	.	.	.	.
gene11290	lhpp.S	lhpp	S	X	.	.	.	.	.	.	.	.	.	.	.	.	.	.	.	.	.	.	.	.	.	.	.	.
gene11291	mapk12.S	mapk12	S	X	.	.	X	.	U	.	i	i	.	i	.	.	.	i	.	.	.	.	.	.	.	.	.	.
gene11292	ubqln4.L	ubqln4	LS	X	.	.	.	X	.	.	.	i	i	i	ei	.	.	.	.	.	.	.	.	.	.	.	.	.
gene11293	fam81b.L	fam81b	LS	.	.	.	.	.	.	.	.	.	.	.	.	.	.	.	.	.	.	.	.	.	.	.	.	.
gene11294	.	.	.	X	.	.	.	.	.	.	.	.	.	.	.	.	.	.	.	.	.	.	.	.	.	.	.	.
gene11295	rraga.S	rraga	LS	X	.	.	.	.	.	.	.	.	.	.	.	.	.	.	.	.	.	.	.	.	.	.	.	.
gene11296	armt1.L	armt1	L	X	.	.	.	.	.	.	.	.	.	.	.	.	.	.	.	.	.	.	.	.	.	.	.	.
gene11297	.	.	.	.	.	.	.	.	.	.	.	.	.	.	.	.	.	.	.	.	.	.	.	.	.	.	.	.
gene11298	.	.	.	X	.	.	.	.	.	.	.	.	.	.	.	.	.	.	.	.	.	.	.	.	.	.	.	.
gene11299	akap11.L	akap11	LS	X	.	.	.	.	.	.	.	.	.	.	.	.	.	.	.	.	.	.	.	.	.	.	.	.
gene113	znrd2.S	znrd2	LS	X	.	.	.	.	.	.	.	.	.	.	.	.	.	.	.	.	.	.	.	.	.	.	.	.
gene1130	mafb.S	mafb	LS	X	.	.	.	.	.	.	e	.	e	.	.	.	.	.	.	.	.	.	.	.	.	.	.	.
gene11300	cbln1.L	cbln1	L	.	.	.	.	X	.	.	.	.	.	.	e	.	.	.	.	.	.	.	.	.	.	.	.	.
gene11301	.	.	.	X	.	.	.	.	.	.	.	.	.	.	.	.	.	.	.	.	.	.	.	.	.	.	.	.
gene11302	ccne2.L	ccne2	LS	X	.	X	X	X	D	D	ei	ei	.	ei	e	ei	.	.	i	.	ei	.	i	.	ei	.	ei	.
gene11303	nog.L	nog	LS	.	X	.	X	X	.	.	e	e	e	e	e	.	.	.	.	.	.	.	.	.	.	.	.	.
gene11304	maff.S	maff	LS	X	.	X	X	X	U	D	i	i	.	i	i	i	.	i	.	.	.	.	.	.	i	.	.	.
gene11305	gnl1.L	gnl1	LS	X	.	.	.	.	.	.	.	.	.	.	.	.	.	.	.	.	.	.	.	.	.	.	.	.
gene11306	.	.	.	.	.	.	.	.	.	.	.	.	.	.	.	.	.	.	.	.	.	.	.	.	.	.	.	.
gene11307	cog1.S	cog1	S	X	.	.	.	.	.	.	.	.	.	.	.	.	.	.	.	.	.	.	.	.	.	.	.	.
gene11308	.	.	.	.	.	.	.	X	.	U	.	.	.	.	e	.	.	.	.	.	.	.	.	.	.	.	.	e
gene11309	rabgef1.S	rabgef1	LS	X	.	.	.	.	.	.	.	.	.	.	.	.	.	.	.	.	.	.	.	.	.	.	.	.
gene1131	fktn.L	fktn	LS	.	.	.	.	.	.	.	.	.	.	.	.	.	.	.	.	.	.	.	.	.	.	.	.	.
gene11310	.	.	.	.	.	.	.	.	.	.	.	.	.	.	.	.	.	.	.	.	.	.	.	.	.	.	.	.
gene11311	adam33.S	adam33	LS	.	.	.	.	.	.	.	.	.	.	e	.	.	.	.	.	.	.	.	.	.	.	.	.	.
gene11312	.	.	.	X	.	.	.	.	.	.	.	.	.	.	.	.	.	.	.	.	.	.	.	.	.	.	.	.
gene11313	lpar3.S	lpar3	LS	.	.	.	.	.	.	.	.	.	.	.	.	.	.	.	.	.	.	.	.	.	.	.	.	.
gene11314	ormdl2.S	ormdl2	LS	X	.	.	.	.	.	.	i	.	.	i	.	.	.	.	.	.	.	.	.	.	.	.	.	.
gene11315	wrap53.L	wrap53	L	X	.	.	X	.	U	.	i	i	.	i	.	.	.	i	.	.	.	.	.	.	.	.	.	.
gene11316	nucks1.S	nucks1	LS	X	.	X	X	X	.	D	i	i	.	i	ei	i	.	.	.	.	.	.	.	.	i	.	.	.
gene11317	adamtsl4.S	adamtsl4	LS	.	.	.	.	.	.	.	.	.	.	.	.	.	.	.	.	.	.	.	.	.	.	.	.	.
gene11318	bst1.L	bst1	L	.	.	.	.	.	.	.	.	.	.	e	.	.	.	.	.	.	.	.	.	.	.	.	.	.
gene11319	.	.	.	X	.	.	.	.	.	.	.	.	.	.	.	.	.	.	.	.	.	.	.	.	.	.	.	.
gene1132	grik2.S	grik2	LS	.	.	.	.	.	.	.	.	.	.	.	.	.	.	.	.	.	.	.	.	.	.	.	.	.
gene11320	eif3l.S	eif3l	LS	X	.	.	.	.	.	.	.	.	.	.	.	.	.	.	.	.	.	.	.	.	.	.	.	.
gene11321	smpdl3b.S	smpdl3b	S	.	.	.	.	.	.	.	.	.	.	.	.	.	.	.	.	.	.	.	.	.	.	.	.	.
gene11322	.	.	.	.	.	.	.	.	.	.	.	.	.	.	.	.	.	.	.	.	.	.	.	.	.	.	.	.
gene11323	.	.	.	.	.	.	.	.	.	.	.	.	.	.	.	.	.	.	.	.	.	.	.	.	.	.	.	.
gene11324	srp19.S	srp19	LS	X	.	.	.	X	.	.	i	.	.	i	ei	.	.	.	.	.	.	.	.	.	.	.	.	.
gene11325	ppp1r26.S	ppp1r26	LS	X	.	.	.	.	.	.	i	.	.	.	.	.	.	.	.	.	.	.	.	.	.	.	.	.
gene11326	ramp1.L	ramp1	LS	.	.	.	.	.	.	.	.	.	.	.	.	.	.	.	.	.	.	.	.	.	.	.	.	.
gene11327	slc27a4.S	slc27a4	LS	X	.	.	.	.	.	.	.	.	.	.	.	.	.	.	.	.	.	.	.	.	.	.	.	.
gene11328	mrps24.S	mrps24	S	X	.	.	.	.	D	.	.	.	.	.	.	e	.	.	.	.	e	.	.	.	.	.	.	.
gene11329	nxpe3l.1.S	nxpe3l.1	LS	X	.	.	.	.	.	U	.	.	.	e	.	.	.	.	.	.	.	.	.	.	.	.	.	e
gene1133	.	.	.	.	.	.	.	.	.	.	.	.	.	.	.	.	.	.	.	.	.	.	.	.	.	.	.	.
gene11330	atrip.L	atrip	LS	X	.	.	.	.	.	.	.	.	.	.	.	.	.	.	.	.	.	.	.	.	.	.	.	.
gene11331	pcdh8.L	pcdh8	LS	.	.	X	X	.	U	D	ei	ei	.	ei	.	ei	.	i	.	ei	.	ei	e	.	ei	.	ei	.
gene11332	il1r1.S	il1r1	S	.	.	.	.	.	.	.	.	.	.	.	.	.	.	.	.	.	.	.	.	.	.	.	.	.
gene11333	taf1a.L	taf1a	L	X	.	.	.	.	.	.	.	.	.	.	.	.	.	.	.	.	.	.	.	.	.	.	.	.
gene11334	ints2.S	ints2	S	X	.	.	.	.	.	.	.	.	.	.	.	.	.	.	.	.	.	.	.	.	.	.	.	.
gene11335	usp44.L	usp44	LS	X	.	.	.	.	.	.	.	.	.	.	.	.	.	.	.	.	.	.	.	.	.	.	.	.
gene11336	.	.	.	X	.	.	.	.	.	.	.	.	.	.	.	.	.	.	.	.	.	.	.	.	.	.	.	.
gene11337	slc25a29.S	slc25a29	LS	X	.	.	.	X	.	.	.	.	.	.	e	.	.	.	.	.	.	.	.	.	.	.	.	.
gene11338	snapc5.L	snapc5	LS	X	.	.	.	.	.	.	.	.	.	.	.	.	.	.	.	.	.	.	.	.	.	.	.	.
gene11339	gdap1.L	gdap1	LS	.	.	.	.	.	.	D	.	.	.	e	.	.	.	.	.	.	.	.	.	.	.	.	e	.
gene1134	fcrl5.S	fcrl5	S	.	.	.	.	.	.	.	.	.	.	.	.	.	.	.	.	.	.	.	.	.	.	.	.	.
gene11340	taf1b.L	taf1b	LS	X	.	.	.	.	.	.	.	.	.	.	.	.	.	.	.	.	.	.	.	.	.	.	.	.
gene11341	pamr1.S	pamr1	S	.	.	.	.	.	.	.	.	.	.	.	.	.	.	.	.	.	.	.	.	.	.	.	.	.
gene11342	atg101.S	atg101	LS	X	.	.	.	.	.	.	.	.	.	.	.	.	.	.	.	.	.	.	.	.	.	.	.	.
gene11343	nrip1.S	nrip1	LS	X	.	.	.	.	.	.	.	.	.	.	.	.	.	.	.	.	.	.	.	.	.	.	.	.
gene11344	mtbp.S	mtbp	S	X	.	.	.	.	.	.	.	.	.	.	.	.	.	.	.	.	.	.	.	.	.	.	.	.
gene11345	acbd6.S	acbd6	LS	X	.	.	.	.	.	.	.	.	.	.	.	.	.	.	.	.	.	.	.	.	.	.	.	.
gene11346	crkl.L	crkl	LS	X	.	X	X	.	.	D	i	i	.	i	.	i	.	.	.	.	.	.	i	.	i	.	.	.
gene11347	.	.	.	X	.	.	.	.	.	.	.	.	.	.	.	.	.	.	.	.	.	.	.	.	.	.	.	.
gene11348	alg10.L	alg10	LS	X	.	.	.	.	.	.	.	.	e	.	.	.	.	.	.	.	.	.	.	.	.	.	.	.
gene11349	.	.	.	X	.	.	.	.	.	.	.	.	e	.	.	.	.	.	.	.	.	.	.	.	.	.	.	.
gene1135	trmt2a.S	trmt2a	LS	X	.	.	.	.	.	.	.	.	.	.	.	.	.	.	.	.	.	.	.	.	.	.	.	.
gene11350	katnal1.S	katnal1	LS	X	.	.	.	.	.	.	.	.	.	.	.	.	.	.	.	.	.	.	.	.	.	.	.	.
gene11351	nars1.L	nars1	LS	X	.	.	.	.	.	.	.	.	.	.	.	.	.	.	.	.	.	.	.	.	.	.	.	.
gene11352	gtpbp2.L	gtpbp2	LS	X	.	.	X	.	U	.	i	i	.	i	.	.	.	i	.	i	.	i	.	.	.	.	.	.
gene11353	rab11a.S	rab11a	LS	X	.	X	X	.	.	.	i	i	.	i	.	i	.	.	.	.	.	.	.	.	.	.	.	.
gene11354	smim12.L	smim12	LS	X	.	.	.	.	.	.	.	.	.	.	.	.	.	.	.	.	.	.	.	.	.	.	.	.
gene11355	.	.	.	X	.	.	.	.	.	.	.	.	.	.	.	.	.	.	.	.	.	.	.	.	.	.	.	.
gene11356	.	.	.	.	.	.	.	.	.	.	.	.	.	.	.	.	.	.	.	.	.	.	.	.	.	.	.	.
gene11357	diras3.S	diras3	LS	.	.	.	.	.	.	.	.	.	.	.	.	.	.	.	.	.	.	.	.	.	.	.	.	.
gene11358	XB5820455.L [provisional:mr1]	XB5820455 [provisional:mr1]	L	.	.	.	.	.	.	.	.	.	.	.	.	.	.	.	.	.	.	.	.	.	.	.	.	.
gene11359	arntl.L	arntl	LS	X	.	.	.	.	.	.	.	.	.	.	.	.	.	.	.	.	.	.	.	.	.	.	.	.
gene1136	tmx3.L	tmx3	LS	X	.	.	.	.	.	.	.	.	.	.	.	.	.	.	.	.	.	.	.	.	.	.	.	.
gene11360	gpr45.L	gpr45	LS	X	.	.	.	.	.	.	.	.	e	.	.	.	.	.	.	.	.	.	.	.	.	.	.	.
gene11361	golga5.L	golga5	LS	X	.	.	.	.	.	.	.	.	.	.	.	.	.	.	.	.	.	.	.	.	.	.	.	.
gene11362	arrdc4.S	arrdc4	LS	X	.	.	.	.	.	.	.	.	.	.	.	.	.	.	.	.	.	.	.	.	.	.	.	.
gene11363	commd4.S	commd4	LS	X	.	.	.	.	.	.	.	.	.	.	.	.	.	.	.	.	.	.	.	.	.	.	.	.
gene11364	mrpl39.S	mrpl39	LS	.	.	.	.	.	.	.	.	.	.	.	.	.	.	.	.	.	.	.	.	.	.	.	.	.
gene11365	hacl1.L	hacl1	L	X	.	.	.	.	.	.	.	.	.	.	.	.	.	.	.	.	.	.	.	.	.	.	.	.
gene11366	dtnbp1.S	dtnbp1	LS	X	.	.	.	.	.	.	.	.	.	.	.	.	.	.	.	.	.	.	.	.	.	.	.	.
gene11367	wdr7.S	wdr7	LS	X	.	.	.	.	.	.	.	.	e	e	.	.	.	.	.	.	.	.	.	.	.	.	.	.
gene11368	fkbp7.L	fkbp7	L	.	.	.	.	.	.	.	.	.	.	.	.	.	.	.	.	.	.	.	.	.	.	.	.	.
gene11369	cabp7.S	cabp7	LS	.	.	.	.	.	.	.	.	.	.	.	.	.	.	.	.	.	.	.	.	.	.	.	.	.
gene1137	.	.	.	X	.	.	.	.	.	.	.	.	.	.	.	.	.	.	.	.	.	.	.	.	.	.	.	.
gene11370	tlcd3a.S	tlcd3a	LS	X	.	.	.	.	.	.	.	.	e	e	.	.	.	.	.	.	.	.	.	.	.	.	.	.
gene11371	u2af1.L	u2af1	LS	X	.	.	X	X	.	.	i	i	.	i	ei	.	.	.	.	.	.	.	.	.	.	.	.	.
gene11372	zp2.L	zp2	L	X	.	.	.	.	.	.	.	.	.	.	.	.	.	.	.	.	.	.	.	.	.	.	.	.
gene11373	styxl1.L	styxl1	L	X	.	.	.	.	.	.	.	.	.	.	.	.	.	.	.	.	.	.	.	.	.	.	.	.
gene11374	nuf2.L	nuf2	LS	X	.	.	.	.	.	.	.	.	.	.	.	.	.	.	.	.	.	.	.	.	.	.	.	.
gene11375	.	.	.	.	.	.	.	.	.	.	.	.	.	.	.	.	.	.	.	.	.	.	.	.	.	.	.	.
gene11376	nectin1.L	nectin1	L	.	.	.	.	X	.	.	.	e	.	e	e	.	.	.	.	.	.	.	.	.	.	.	.	.
gene11377	tmem56.2.S	tlcd4.2	LS	X	.	.	.	.	.	.	.	.	.	.	.	.	.	.	.	.	.	.	.	.	.	.	.	.
gene11378	ptx4.L	ptx4	LS	.	.	.	.	.	.	.	.	.	.	.	.	.	.	.	.	.	.	.	.	.	.	.	.	.
gene11379	st6gal2.S	st6gal2	LS	.	.	.	.	.	.	.	.	.	.	.	.	.	.	.	.	.	.	.	.	.	.	.	.	.
gene1138	hnf4b.S	hnf4b	LS	.	.	.	.	.	.	.	.	.	.	.	.	.	.	.	.	.	.	.	.	.	.	.	.	.
gene11380	tstd2.L	tstd2	LS	X	.	.	.	.	.	.	.	.	.	.	.	.	.	.	.	.	.	.	.	.	.	.	.	.
gene11381	XB6001422.L [provisional]	XB6001422 [provisional]	L	X	.	.	.	.	.	.	i	.	.	i	.	.	.	.	.	.	.	.	.	.	.	.	.	.
gene11382	snrnp70.L	snrnp70	LS	X	.	X	X	X	.	D	i	i	.	i	e	i	.	.	.	.	.	.	i	.	i	.	i	.
gene11383	mfsd10.L	mfsd10	LS	X	.	.	.	.	.	U	.	.	.	.	.	.	.	.	.	.	.	.	.	.	.	.	.	e
gene11384	polr1d.2.L	polr1d.2	L	X	.	.	.	.	.	.	.	i	.	i	.	.	.	.	.	.	.	.	.	.	.	.	.	.
gene11385	lamp2.L	lamp2	LS	X	.	.	.	.	.	.	.	.	.	.	.	.	.	.	.	.	.	.	.	.	.	.	.	.
gene11386	irx2.L	irx2	LS	.	.	.	.	X	D	D	.	ei	.	ei	ei	ei	.	.	ei	.	ei	.	e	.	ei	.	ei	.
gene11387	adprs.L	adprs	LS	X	.	.	.	.	.	.	.	.	.	.	.	.	.	.	.	.	.	.	.	.	.	.	.	.
gene11388	kbtbd3.S	kbtbd3	S	X	.	.	.	.	.	.	.	.	.	.	.	.	.	.	.	.	.	.	.	.	.	.	.	.
gene11389	.	.	.	X	.	.	.	.	.	.	.	.	.	.	.	.	.	.	.	.	.	.	.	.	.	.	.	.
gene1139	lin7c.2.L	lin7c.2	L	X	.	.	.	.	.	.	.	.	.	.	.	.	.	.	.	.	.	.	.	.	.	.	.	.
gene11390	itpk1.L	itpk1	LS	X	.	.	.	.	.	.	.	.	.	.	.	.	.	.	.	.	.	.	.	.	.	.	.	.
gene11391	soga1.S	soga1	LS	X	.	.	.	.	.	.	.	.	.	.	.	.	.	.	.	.	.	.	.	.	.	.	.	.
gene11392	ppat.S	ppat	LS	X	.	X	X	.	U	.	i	i	.	i	.	i	.	.	.	.	.	i	.	.	.	.	.	.
gene11393	ammecr1.S	ammecr1	LS	X	.	.	.	.	.	.	.	.	.	.	.	.	.	.	.	.	.	.	.	.	.	.	.	.
gene11394	.	.	.	.	.	.	.	.	.	D	.	.	.	.	.	.	.	.	.	.	.	.	.	.	.	.	e	.
gene11395	qrsl1.L	qrsl1	L	X	.	.	.	.	.	.	.	.	.	e	.	.	.	.	.	.	.	.	.	.	.	.	.	.
gene11396	agxt.L	agxt	LS	.	.	.	.	.	.	.	.	.	.	.	.	.	.	.	.	.	.	.	.	.	.	.	.	.
gene11397	hdac1.L	hdac1	LS	X	.	X	X	X	U	D	i	i	.	i	ei	i	.	i	.	.	.	.	i	.	i	.	i	.
gene11398	rpl4.S	rpl4	LS	X	.	.	X	X	.	.	i	i	.	i	i	.	.	.	.	.	.	.	.	.	.	.	.	.
gene11399	tsen2.L	tsen2	L	X	.	.	.	.	.	.	.	.	.	.	.	.	.	.	.	.	.	.	.	.	.	.	.	.
gene114	rbx1.S	rbx1	LS	X	.	.	.	.	.	.	.	.	.	i	.	.	.	.	.	.	.	.	.	.	.	.	.	.
gene1140	btaf1.L	btaf1	L	X	.	.	.	.	.	.	.	.	.	.	.	.	.	.	.	.	.	.	.	.	.	.	.	.
gene11400	paqr4.L	paqr4	LS	X	.	.	.	.	.	.	.	.	.	i	.	.	.	.	.	.	.	.	.	.	.	.	.	.
gene11401	cplane2l.S	cplane2l	S	X	.	.	.	X	.	.	.	.	.	.	i	.	.	.	.	.	.	.	.	.	.	.	.	.
gene11402	setd7.S	setd7	LS	.	.	.	.	.	.	.	.	.	.	.	.	.	.	.	.	.	.	.	.	.	.	.	.	.
gene11403	dap.S	dap	LS	X	.	.	.	.	.	.	.	.	.	.	.	.	.	.	.	.	.	.	.	.	.	.	.	.
gene11404	ndfip2.S	ndfip2	LS	X	.	.	.	.	.	.	.	.	e	e	.	.	.	.	.	.	.	.	.	.	.	.	.	.
gene11405	serpinb6.L	serpinb6	L	X	.	.	.	.	.	.	.	.	.	.	.	.	.	.	.	.	.	.	.	.	.	.	.	.
gene11406	pdia5.L	pdia5	LS	X	.	.	.	.	.	.	.	.	.	.	.	.	.	.	.	.	.	.	.	.	.	.	.	.
gene11407	ocm4.5.S	ocm4.5	LS	.	.	.	.	.	.	.	.	.	.	.	.	.	.	.	.	.	.	.	.	.	.	.	.	.
gene11408	aen.L	aen	LS	X	.	.	.	.	.	.	.	.	.	.	.	.	.	.	.	.	.	.	.	.	.	.	.	.
gene11409	mospd1.L	mospd1	L	.	.	.	.	.	.	.	.	.	.	.	.	.	.	.	.	.	.	.	.	.	.	.	.	.
gene1141	fhip1a.L	fhip1a	LS	X	.	.	.	.	.	.	.	.	.	e	.	.	.	.	.	.	.	.	.	.	.	.	.	.
gene11410	ago1.L	ago1	LS	X	.	.	.	.	.	.	.	.	.	.	.	.	.	.	.	.	.	.	.	.	.	.	.	.
gene11411	.	.	.	.	.	.	.	X	.	D	.	.	.	.	e	.	.	.	.	.	.	.	.	.	.	.	e	.
gene11412	nutf2.L	nutf2	L	X	.	.	.	.	.	.	.	.	.	.	.	.	.	.	.	.	.	.	.	.	.	.	.	.
gene11413	mpp1.L	mpp1	L	X	.	.	.	.	.	.	.	.	.	.	.	.	.	.	.	.	.	.	.	.	.	.	.	.
gene11414	.	.	.	.	.	X	X	.	.	.	ei	i	.	ei	.	ei	.	.	.	.	.	.	.	.	.	.	.	.
gene11415	lyrm4.L	lyrm4	LS	X	.	.	.	.	.	.	.	.	.	.	.	e	.	.	.	.	.	.	.	.	.	.	.	.
gene11416	dgka.L	dgka	LS	X	.	X	X	X	D	D	ei	i	.	ei	ei	i	ei	.	ei	.	ei	.	i	.	i	.	ei	.
gene11417	osr2.L	osr2	LS	.	.	X	X	X	U	.	i	ei	.	i	ei	i	.	.	.	i	.	ei	.	.	.	.	.	.
gene11418	anxa1.2.L	anxa1.2	LS	.	.	.	.	.	.	.	.	.	e	.	.	.	.	.	.	.	.	.	.	.	.	.	.	.
gene11419	slc22a5.L	slc22a5	L	X	.	.	X	X	.	.	i	i	.	i	ei	.	.	.	.	.	.	.	.	.	.	.	.	.
gene1142	.	.	.	.	.	.	.	.	.	.	.	.	.	.	.	.	.	.	.	.	.	.	.	.	.	.	.	.
gene11420	jup.S	jup	LS	X	.	.	.	.	.	.	.	.	.	.	.	.	.	.	.	.	.	.	.	.	.	.	.	.
gene11421	ldlrad3.S	ldlrad3	LS	.	.	.	.	X	.	.	.	.	.	.	e	.	.	.	.	.	.	.	.	.	.	.	.	.
gene11422	psmg2.L	psmg2	L	X	.	.	.	.	.	.	i	.	.	i	.	.	.	.	.	.	.	.	.	.	.	.	.	.
gene11423	obsl1.L	obsl1	L	.	.	.	.	.	.	.	.	.	.	.	.	.	.	.	.	.	.	.	.	.	.	.	.	.
gene11424	arhgap40.L	arhgap40	LS	.	.	.	.	X	.	.	.	.	.	.	e	.	.	.	.	.	.	.	.	.	.	.	.	.
gene11425	coq10a.L	coq10a	LS	X	.	.	.	.	.	.	.	.	.	.	.	.	.	.	.	.	.	.	.	.	.	.	.	.
gene11426	.	.	.	.	.	.	.	.	.	.	.	.	.	.	.	.	.	.	.	.	.	.	.	.	.	.	.	.
gene11427	plp1.L	plp1	LS	.	.	.	.	.	.	.	.	.	.	.	.	.	.	.	.	.	.	.	.	.	.	.	.	.
gene11428	gckr.L	gckr	L	.	.	.	.	.	.	D	.	.	.	.	.	.	.	.	.	.	.	.	.	.	.	.	e	.
gene11429	gpr85.L	gpr85	LS	.	.	.	.	.	.	.	.	.	.	.	.	.	.	.	.	.	.	.	.	.	.	.	.	.
gene1143	.	.	.	.	.	.	.	.	.	D	e	.	.	e	.	.	.	.	.	.	.	.	.	.	.	.	e	.
gene11430	mybpc1.S	mybpc1	LS	.	.	.	.	.	.	.	.	.	.	.	.	.	.	.	.	.	.	.	.	.	.	.	.	.
gene11431	raf1.L	raf1	LS	X	.	X	X	X	U	.	i	i	.	i	i	i	.	i	.	i	.	i	.	.	.	.	.	.
gene11432	hoxa5.L	hoxa5	LS	.	.	.	.	.	.	.	.	.	.	.	.	.	.	.	.	.	.	.	.	.	.	.	.	.
gene11433	bcap29.S	bcap29	LS	X	.	.	.	.	.	.	.	.	.	.	.	.	.	.	.	.	.	.	.	.	.	.	.	.
gene11434	ap5b1.L	ap5b1	L	X	.	.	.	.	.	.	.	.	.	.	.	.	.	.	.	.	.	.	.	.	.	.	.	.
gene11435	smtn.S	smtn	LS	X	X	X	X	.	.	D	i	i	i	i	.	i	.	.	.	.	.	.	.	.	i	.	i	.
gene11436	tmem269.L	tmem269	L	.	.	.	.	X	.	.	.	.	.	.	e	.	.	.	.	.	.	.	.	.	.	.	.	.
gene11437	mafk.S	mafk	LS	.	.	.	.	.	.	.	.	.	.	.	.	.	.	.	.	.	.	.	.	.	.	.	.	.
gene11438	oaf.S	oaf	LS	X	.	.	.	.	.	D	.	.	.	.	.	.	.	.	.	.	.	.	.	.	.	.	e	.
gene11439	ttr.L	ttr	LS	.	.	.	.	.	.	.	.	.	.	.	.	.	.	.	.	.	.	.	.	.	.	.	.	.
gene1144	slitrk5.L	slitrk5	LS	.	.	.	.	.	.	.	.	.	.	.	.	.	.	.	.	.	.	.	.	.	.	.	.	.
gene11440	slc38a3.S	slc38a3	S	X	.	.	.	.	.	.	.	.	e	.	.	.	.	.	.	.	.	.	.	.	.	.	.	.
gene11441	.	.	.	.	.	.	.	.	.	.	.	.	.	.	.	.	.	.	.	.	.	.	.	.	.	.	.	.
gene11442	tmem196.L	tmem196	LS	.	.	.	.	.	.	.	.	.	.	.	.	.	.	.	.	.	.	.	.	.	.	.	.	.
gene11443	.	.	.	.	.	.	.	.	.	.	.	.	.	.	.	.	.	.	.	.	.	.	.	.	.	.	.	.
gene11444	snrpe.S	snrpe	LS	X	.	.	X	X	.	.	i	i	.	i	i	.	.	.	.	.	.	.	.	.	.	.	.	.
gene11445	ywhaz.S	ywhaz	LS	X	.	X	X	X	U	D	i	i	.	i	i	i	.	i	.	.	.	.	.	.	i	.	.	.
gene11446	esr1.L	esr1	LS	X	.	.	.	.	.	.	.	.	.	.	.	.	.	.	.	.	.	.	.	.	.	.	.	.
gene11447	per3.L	per3	LS	X	.	X	X	.	U	D	i	i	.	i	.	i	.	i	.	.	.	.	i	.	i	.	i	.
gene11448	ovch2.S	ovch2	S	.	.	.	.	.	.	.	.	.	.	.	.	.	.	.	.	.	.	.	.	.	.	.	.	.
gene11449	nalcn.S	nalcn	LS	X	.	.	.	.	.	D	.	.	.	.	.	.	.	.	.	.	.	.	.	.	.	.	e	.
gene1145	tubb.L	tubb	L	X	.	.	.	X	.	D	.	i	.	i	ei	.	.	.	.	.	.	.	.	.	i	.	.	.
gene11450	.	.	.	X	.	.	.	.	.	.	.	.	.	.	.	.	.	.	.	.	.	.	.	.	.	.	.	.
gene11451	fam161a.L	fam161a	L	X	.	.	.	.	.	.	.	.	.	.	.	.	.	.	.	.	.	.	.	.	.	.	.	.
gene11452	b4galt3l1.L	b4galt3l1	LS	X	.	.	.	.	.	.	.	.	.	.	.	.	.	.	.	.	.	.	.	.	.	.	.	.
gene11453	cldn3.L	cldn3	L	.	.	.	.	.	.	.	.	.	.	.	.	.	.	.	.	.	.	.	.	.	.	.	.	.
gene11454	htr5a.L	htr5a	LS	.	.	.	.	.	.	.	.	.	.	.	.	.	.	.	.	.	.	.	.	.	.	.	.	.
gene11455	utp14a.L	utp14a	L	X	.	.	X	X	.	.	i	i	.	i	i	.	.	.	.	.	.	.	.	.	.	.	.	.
gene11456	gpbar1.S	gpbar1	LS	.	.	.	.	.	.	.	.	.	.	.	.	.	.	.	.	.	.	.	.	.	.	.	.	.
gene11457	lrrc4b.S	lrrc4b	LS	.	X	.	X	X	U	.	i	ei	i	ei	i	.	.	.	.	.	.	e	.	.	.	.	.	.
gene11458	.	.	.	X	.	.	.	.	.	D	.	.	.	.	.	.	.	.	.	.	.	.	.	.	.	.	e	.
gene11459	ahsg.L	ahsg	L	X	.	.	.	.	.	.	.	.	.	.	.	.	.	.	.	.	.	.	.	.	.	.	.	.
gene1146	etv4.L	etv4	L	X	.	.	X	X	D	.	i	i	.	i	ei	.	.	.	.	.	i	.	.	.	.	.	.	.
gene11460	coq6.L	coq6	LS	X	.	.	.	.	.	.	.	.	.	.	.	.	.	.	.	.	.	.	.	.	.	.	.	.
gene11461	timm21.S	timm21	LS	X	.	.	.	.	.	.	.	.	.	.	.	.	.	.	.	.	.	.	.	.	.	.	.	.
gene11462	snx31.L	snx31	LS	X	.	.	.	X	U	.	i	.	i	i	i	.	.	.	.	.	.	i	.	.	.	.	.	.
gene11463	.	.	.	X	.	.	.	.	.	.	.	.	.	.	.	.	.	.	.	.	.	.	.	.	.	.	.	.
gene11464	pfkfb4.L	pfkfb4	LS	X	.	X	X	X	U	D	i	i	.	i	ei	i	.	i	.	.	.	i	.	.	i	.	i	.
gene11465	mier1.L	mier1	LS	X	X	.	X	X	U	.	i	i	i	i	i	.	.	i	.	.	.	.	.	.	.	.	.	.
gene11466	.	.	.	X	.	.	.	.	.	.	.	.	.	.	.	.	.	.	.	.	.	.	.	.	.	.	.	.
gene11467	hand1.L	hand1	L	.	.	.	.	.	.	.	.	.	.	.	.	.	.	.	.	.	.	.	.	.	.	.	.	.
gene11468	znf750.L	znf750	LS	.	.	X	X	X	.	D	ei	ei	.	ei	e	ei	.	.	.	.	.	.	.	.	ei	.	ei	.
gene11469	cmtr1.S	cmtr1	LS	X	.	.	.	.	.	.	.	.	.	.	.	.	.	.	.	.	.	.	.	.	.	.	.	.
gene1147	gpbar1.L	gpbar1	LS	.	.	.	.	.	.	.	.	.	.	.	.	.	.	.	.	.	.	.	.	.	.	.	.	.
gene11470	htr2c.S	htr2c	LS	.	.	.	.	.	.	.	.	.	.	.	.	.	.	.	.	.	.	.	.	.	.	.	.	.
gene11471	psma7.L	psma7	LS	X	.	.	X	.	.	D	i	i	.	i	.	.	.	.	.	.	.	.	.	.	i	.	.	.
gene11472	.	.	.	.	.	.	.	.	.	.	.	.	.	.	.	.	.	.	.	.	.	.	.	.	.	.	.	.
gene11473	.	.	.	X	.	X	X	X	D	D	ei	ei	.	ei	e	e	.	.	.	.	.	.	.	.	e	.	.	.
gene11474	.	.	.	.	.	.	.	.	.	.	.	.	.	.	.	.	.	.	.	.	.	.	.	.	.	.	.	.
gene11475	ier2.S	ier2	LS	X	.	.	.	.	.	.	e	e	.	.	.	e	.	.	.	.	.	.	.	.	.	.	.	.
gene11476	calb2.S	calb2	LS	.	.	.	.	.	.	.	.	.	.	.	.	.	.	.	.	.	.	.	.	.	.	.	.	.
gene11477	poc5.L	poc5	L	X	.	.	.	.	.	.	.	.	.	.	.	.	.	.	.	.	.	.	.	.	.	.	.	.
gene11478	chfr.S	chfr	LS	X	.	.	.	.	.	.	.	.	e	.	.	.	.	.	.	.	.	.	.	.	.	.	.	.
gene11479	ncam2.S	ncam2	LS	X	.	.	.	.	.	.	.	.	.	.	.	.	.	.	.	.	.	.	.	.	.	.	.	.
gene1148	lyn.S	lyn	LS	X	.	.	.	.	.	.	.	.	.	.	.	.	.	.	.	.	.	.	.	.	.	.	.	.
gene11480	mthfsd.L	mthfsd	L	X	.	.	.	.	.	.	.	.	.	.	.	.	.	.	.	.	.	.	.	.	.	.	.	.
gene11481	snx2.L	snx2	LS	X	.	.	.	.	.	.	.	.	.	.	.	.	.	.	.	.	.	.	.	.	.	.	.	.
gene11482	tinagl1.S	tinagl1	LS	.	.	.	.	.	.	.	.	.	.	.	.	.	.	.	.	.	.	.	.	.	.	.	.	.
gene11483	.	.	.	.	.	X	X	X	D	D	ei	ei	.	ei	e	ei	ei	.	ei	.	ei	.	.	.	e	.	e	.
gene11484	bmp15.S	bmp15	LS	.	.	.	.	.	.	.	.	.	.	.	.	.	.	.	.	.	.	.	.	.	.	.	.	.
gene11485	shpk.S	shpk	LS	X	.	.	.	.	.	.	.	.	.	e	.	.	.	.	.	.	.	.	.	.	.	.	.	.
gene11486	ccl5.L	ccl5	LS	.	.	.	.	.	.	.	.	.	.	.	.	.	.	.	.	.	.	.	.	.	.	.	.	.
gene11487	got2.S	got2	LS	X	.	.	.	.	.	.	.	.	.	.	.	.	.	.	.	.	.	.	.	.	.	.	.	.
gene11488	XB996620.L [provisional:c1orf198]	XB996620 [provisional:c1orf198]	L	X	X	X	X	X	.	D	ei	ei	e	ei	e	i	.	.	.	.	.	.	.	.	.	.	i	.
gene11489	ccdc47.L	ccdc47	LS	X	.	.	X	X	U	.	i	i	.	i	ei	.	.	i	.	.	.	i	.	.	.	.	.	.
gene1149	trmt10c.L	trmt10c	LS	X	.	.	.	.	.	.	.	.	.	.	.	.	.	.	.	.	.	.	.	.	.	.	.	.
gene11490	txnl1.L	txnl1	LS	X	.	.	.	.	.	.	.	.	.	.	.	.	.	.	.	.	.	.	.	.	.	.	.	.
gene11491	akt2.S	akt2	LS	X	.	.	.	.	.	.	.	.	.	.	.	.	.	.	.	.	.	.	.	.	.	.	.	.
gene11492	sema3e.S	sema3e	LS	.	.	.	.	.	.	.	.	.	.	.	.	.	.	.	.	.	.	.	.	.	.	.	.	.
gene11493	ylpm1.L	ylpm1	L	X	.	.	X	X	U	.	i	i	.	i	ei	.	.	i	.	.	.	.	.	.	.	.	.	.
gene11494	XB22169469.L [provisional]	XB22169469 [provisional]	L	.	.	.	.	.	.	.	.	.	.	.	.	.	.	.	.	.	.	.	.	.	.	.	.	.
gene11495	snrk.S	snrk	LS	X	.	.	.	.	.	.	.	.	.	.	.	.	.	.	.	.	.	.	.	.	.	.	.	.
gene11496	.	.	.	.	.	.	.	.	.	.	.	.	.	.	.	.	.	.	.	.	.	.	.	.	.	.	.	.
gene11497	.	.	.	.	.	.	.	.	.	.	.	.	.	.	.	.	.	.	.	.	.	.	.	.	.	.	.	.
gene11498	scg2.L	scg2	LS	X	.	.	.	X	.	D	.	.	.	.	e	.	.	.	.	.	.	.	.	.	.	.	e	.
gene11499	lyar.L	lyar	LS	X	.	.	.	.	.	.	.	.	.	.	.	.	.	.	.	.	.	.	.	.	.	.	.	.
gene115	ell3.S	ell3	LS	X	.	.	.	.	.	.	.	.	e	.	.	.	.	.	.	.	.	.	.	.	.	.	.	.
gene1150	ddx3x.S	ddx3x	LS	X	X	X	X	X	U	.	i	i	i	i	i	i	.	i	.	.	.	.	.	.	.	.	.	.
gene11500	.	.	.	.	.	.	.	.	.	.	.	.	.	.	.	.	.	.	.	.	.	.	.	.	.	.	.	.
gene11501	endoul.L	endoul	LS	X	.	.	.	.	U	.	i	.	.	i	.	.	.	.	.	.	.	i	.	.	.	.	.	.
gene11502	.	.	.	X	.	.	.	.	.	.	.	.	e	e	.	.	.	.	.	.	.	.	.	.	.	.	.	.
gene11503	.	.	.	X	.	.	.	.	.	.	.	.	.	.	.	.	.	.	.	.	.	.	.	.	.	.	.	.
gene11504	.	.	.	.	.	.	.	.	.	.	.	.	.	.	.	.	.	.	.	.	.	.	.	.	.	.	.	.
gene11505	enpp6.L	enpp6	L	X	.	.	.	.	.	.	.	.	.	.	.	.	.	.	.	.	.	.	.	.	.	.	.	.
gene11506	.	.	.	.	.	.	.	.	.	.	.	.	.	.	.	.	.	.	.	.	.	.	.	.	.	.	.	.
gene11507	degs1.L	degs1	LS	X	.	X	X	X	U	.	i	i	.	i	ei	i	.	i	.	i	.	.	.	.	.	.	.	.
gene11508	hyal1.L	hyal1	L	X	.	.	.	.	.	.	.	.	.	.	.	.	.	.	.	.	.	.	.	.	.	.	.	.
gene11509	trappc2.S	trappc2	LS	X	.	.	.	.	.	.	.	.	.	.	.	.	.	.	.	.	.	.	.	.	.	.	.	.
gene1151	tmem243.S	tmem243	LS	X	.	.	.	X	.	.	.	i	.	i	i	.	.	.	.	.	.	.	.	.	.	.	.	.
gene11510	fbxl19.L	fbxl19	LS	X	.	.	.	X	U	.	.	.	.	i	i	.	.	.	.	.	.	i	.	.	.	.	.	.
gene11511	kcnk10.L	kcnk10	LS	.	.	.	.	.	.	.	.	.	.	.	.	.	.	.	.	.	.	.	.	.	.	.	.	.
gene11512	hirip3.L	hirip3	LS	X	.	.	.	.	.	.	.	.	.	.	.	.	.	.	.	.	.	.	.	.	.	.	.	.
gene11513	gpr146.L	gpr146	LS	.	.	.	.	.	.	.	.	.	.	.	.	.	.	.	.	.	.	.	.	.	.	.	.	.
gene11514	znf335.S	znf335	LS	X	.	.	.	.	.	.	.	.	.	.	.	.	.	.	.	.	.	.	.	.	.	.	.	.
gene11515	grb7.S	grb7	LS	.	.	.	.	.	.	.	.	.	.	.	.	.	.	.	.	.	.	.	.	.	.	.	.	.
gene11516	.	.	.	.	.	.	.	.	.	.	.	.	.	.	.	.	.	.	.	.	.	.	.	.	.	.	.	.
gene11517	tasor.S	tasor	LS	X	X	X	X	.	.	D	i	i	i	i	.	i	.	.	.	.	.	.	.	.	i	.	.	.
gene11518	brox.L	brox	LS	X	.	.	.	.	.	.	i	.	.	i	.	.	.	.	.	.	.	.	.	.	.	.	.	.
gene11519	ddx25.L	ddx25	L	X	.	.	X	.	D	.	i	i	.	i	.	.	i	.	i	.	i	.	.	.	.	.	.	.
gene1152	fam114a2.S	fam114a2	S	X	.	.	.	.	.	.	.	.	.	.	.	.	.	.	.	.	.	.	.	.	.	.	.	.
gene11520	clec14a.S	clec14a	S	.	.	.	.	.	.	.	.	.	.	.	.	.	.	.	.	.	.	.	.	.	.	.	.	.
gene11521	ppp1r3a.L	ppp1r3a	LS	.	.	.	.	.	.	.	.	.	.	.	.	.	.	.	.	.	.	.	.	.	.	.	.	.
gene11522	heatr6.S	heatr6	S	X	.	.	.	.	.	.	.	.	.	.	.	.	.	.	.	.	.	.	.	.	.	.	.	.
gene11523	antkmt.L	antkmt	L	X	.	.	.	.	.	.	.	.	.	.	.	.	.	.	.	.	.	.	.	.	.	.	.	.
gene11524	akap12.S	akap12	LS	X	.	.	.	X	.	.	.	.	.	.	e	.	.	.	.	.	.	.	.	.	.	.	.	.
gene11525	sec13.S	sec13	S	X	X	.	X	X	.	.	i	i	i	i	ei	.	.	.	.	.	.	.	.	.	.	.	.	.
gene11526	tfdp1.L	tfdp1	LS	X	.	.	.	X	.	.	.	.	.	.	e	.	.	.	.	.	.	.	.	.	.	.	.	.
gene11527	cd28.L	cd28	LS	.	.	.	.	X	.	.	.	.	e	.	e	.	.	.	.	.	.	.	.	.	.	.	.	.
gene11528	comt.2.L	comt.2	LS	.	.	.	.	.	.	.	.	.	.	.	.	.	.	.	.	.	.	.	.	.	.	.	.	.
gene11529	setdb2.S	setdb2	S	X	.	.	.	.	.	.	.	.	.	.	.	.	.	.	.	.	.	.	.	.	.	.	.	.
gene1153	.	.	.	X	.	.	.	.	.	.	.	.	.	.	.	.	.	.	.	.	.	.	.	.	.	.	.	.
gene11530	gclc.S	gclc	LS	X	.	.	.	.	.	.	.	.	.	.	.	.	.	.	.	.	.	.	.	.	.	.	.	.
gene11531	polr2a.L	polr2a	LS	X	.	X	X	X	.	.	i	i	.	i	ei	i	.	.	.	.	.	.	.	.	.	.	.	.
gene11532	trappc12.L	trappc12	LS	X	.	.	.	.	.	.	.	.	.	.	.	.	.	.	.	.	.	.	.	.	.	.	.	.
gene11533	tmem130.S	tmem130	LS	.	.	.	.	.	.	.	.	.	.	.	.	.	.	.	.	.	.	.	.	.	.	.	.	.
gene11534	cel.1.S	cel.1	LS	.	.	.	.	.	.	.	.	.	.	.	.	.	.	.	.	.	.	.	.	.	.	.	.	.
gene11535	.	.	.	X	.	.	.	.	.	.	.	.	.	.	.	.	.	.	.	.	.	.	.	.	.	.	.	.
gene11536	cox7a2.L	cox7a2	LS	X	.	X	X	.	.	.	i	i	.	i	.	e	.	.	.	.	.	.	.	.	.	.	.	.
gene11537	tmem53.S	tmem53	LS	X	.	.	.	.	.	.	.	i	.	i	.	.	.	.	.	.	.	.	.	.	.	.	.	.
gene11538	.	.	.	.	.	.	.	X	.	D	.	.	.	.	e	.	.	.	.	.	.	.	.	.	.	.	e	.
gene11539	tmem64.L	tmem64	LS	X	.	.	.	.	.	.	.	.	.	.	.	.	.	.	.	.	.	.	.	.	.	.	.	.
gene1154	smarcc1.S	smarcc1	LS	X	.	X	X	X	U	D	i	i	.	i	e	i	.	i	.	.	.	i	.	.	i	.	.	.
gene11540	.	.	.	.	.	.	.	.	.	.	.	.	.	.	.	.	.	.	.	.	.	.	.	.	.	.	.	.
gene11541	c1qa.L	c1qa	L	.	.	.	.	.	.	.	.	.	.	.	.	.	.	.	.	.	.	.	.	.	.	.	.	.
gene11542	irf7.L	irf7	L	X	.	.	.	.	.	.	.	.	.	e	.	.	.	.	.	.	.	.	.	.	.	.	.	.
gene11543	klhl32.L	klhl32	LS	X	.	.	.	.	.	.	.	.	.	.	.	.	.	.	.	.	.	.	.	.	.	.	.	.
gene11544	stau2.S	stau2	LS	X	.	.	.	.	.	.	.	.	.	.	.	.	.	.	.	.	.	.	.	.	.	.	.	.
gene11545	ap3s1.S	ap3s1	S	X	.	.	.	.	.	.	.	.	.	.	.	.	.	.	.	.	.	.	.	.	.	.	.	.
gene11546	.	.	.	.	.	.	.	.	.	.	.	.	.	.	.	.	.	.	.	.	.	.	.	.	.	.	.	.
gene11547	stc1.S	stc1	LS	X	.	.	.	.	.	.	.	.	.	.	.	.	.	.	.	.	.	.	.	.	.	.	.	.
gene11548	nckap5l.S	nckap5l	LS	X	.	.	.	.	.	.	.	.	.	.	.	.	.	.	.	.	.	.	.	.	.	.	.	.
gene11549	slitrk1.L	slitrk1	LS	.	.	.	.	.	.	.	.	.	.	.	.	.	.	.	.	.	.	.	.	.	.	.	.	.
gene1155	.	.	.	.	.	.	.	.	.	.	.	.	.	.	.	.	.	.	.	.	.	.	.	.	.	.	.	.
gene11550	cdc37l1.L	cdc37l1	LS	X	.	.	.	X	.	.	i	.	.	i	i	.	.	.	.	.	.	.	.	.	.	.	.	.
gene11551	chmp4c.L	chmp4c	LS	.	.	.	.	X	.	.	.	.	.	.	e	.	.	.	.	.	.	.	.	.	.	.	.	.
gene11552	mea1.S	mea1	LS	X	.	.	.	.	U	.	.	.	.	.	.	.	.	i	.	i	.	ei	.	.	.	.	.	.
gene11553	ikbke.S	ikbke	LS	.	.	.	.	.	.	.	.	.	.	.	.	.	.	.	.	.	.	.	.	.	.	.	.	.
gene11554	ndufb8.S	ndufb8	LS	X	.	.	.	.	.	.	.	.	.	.	.	e	.	.	.	.	.	.	.	.	.	.	.	.
gene11555	tmem94.L	tmem94	L	X	.	.	.	.	.	.	.	.	.	.	.	.	.	.	.	.	.	.	.	.	.	.	.	.
gene11556	fam81b.S	fam81b	LS	X	.	.	.	.	.	.	.	.	.	.	.	.	.	.	.	.	.	.	.	.	.	.	.	.
gene11557	col3a1.S	col3a1	LS	.	.	.	.	.	.	.	.	.	.	.	.	.	.	.	.	.	.	.	.	.	.	.	.	.
gene11558	abr.S	abr	LS	X	.	.	.	.	.	.	.	.	.	.	.	.	.	.	.	.	.	.	.	.	.	.	.	.
gene11559	matn2.S	matn2	LS	.	.	.	.	.	.	.	.	.	.	.	.	.	.	.	.	.	.	.	.	.	.	.	.	.
gene1156	rnf165.S	rnf165	LS	.	.	.	.	X	.	D	e	e	.	.	e	e	.	.	.	.	.	.	.	.	e	.	.	.
gene11560	stard13.L	stard13	LS	.	.	X	X	.	D	D	ei	ei	.	ei	.	ei	ei	.	ei	.	ei	.	ei	.	ei	.	ei	.
gene11561	.	.	.	.	.	.	.	.	D	.	.	.	.	.	.	.	.	.	.	.	e	.	.	.	.	.	.	.
gene11562	sftpa.L	sftpa	L	.	.	.	.	.	.	.	.	.	.	.	.	.	.	.	.	.	.	.	.	.	.	.	.	.
gene11563	abhd17b.L	abhd17b	LS	X	.	.	.	.	.	.	.	.	.	.	.	.	.	.	.	.	.	.	.	.	.	.	.	.
gene11564	psmb1.S	psmb1	S	X	.	.	.	.	.	.	.	.	.	.	.	.	.	.	.	.	.	.	.	.	.	.	.	.
gene11565	dbh.S	dbh	LS	.	.	.	.	.	.	.	.	.	e	.	.	.	.	.	.	.	.	.	.	.	.	.	.	.
gene11566	slc25a19.L	slc25a19	L	X	.	.	.	.	.	.	.	.	.	.	.	.	.	.	.	.	.	.	.	.	.	.	.	.
gene11567	pls3.S	pls3	LS	X	.	.	.	.	.	.	.	.	.	.	.	.	.	.	.	.	.	.	.	.	.	.	.	.
gene11568	csnk2a2.S	csnk2a2	LS	X	.	.	X	X	U	U	i	i	.	i	ei	.	.	i	.	.	.	.	.	.	.	.	.	i
gene11569	.	.	.	.	.	.	.	.	.	D	.	.	e	.	.	.	.	.	.	.	.	.	.	.	.	.	e	.
gene1157	glt8d2.L	glt8d2	LS	.	.	.	.	.	.	U	.	.	.	.	.	.	.	.	.	.	.	.	.	.	.	.	.	e
gene11570	maml1.L	maml1	L	X	X	X	X	X	U	.	i	i	i	i	i	i	.	i	.	i	.	i	.	.	.	.	.	.
gene11571	.	.	.	.	.	.	.	.	.	.	.	.	.	.	.	.	.	.	.	.	.	.	.	.	.	.	.	.
gene11572	mfap1.L	mfap1	LS	X	.	.	X	X	.	.	i	i	.	i	e	.	.	.	.	.	.	.	.	.	.	.	.	.
gene11573	xpo1.S	xpo1	LS	X	X	X	X	X	U	D	i	i	i	i	i	i	.	i	.	i	.	.	.	.	i	.	.	.
gene11574	pde6g.L	pde6g	LS	.	.	.	.	.	.	.	.	.	.	.	.	.	.	.	.	.	.	.	.	.	.	.	.	.
gene11575	alms1.L	alms1	LS	X	.	.	X	.	U	.	i	i	.	i	.	.	.	i	.	.	.	.	.	.	.	.	.	.
gene11576	lyrm2.L	lyrm2	LS	X	.	.	.	.	.	.	.	.	.	.	.	.	.	.	.	.	.	.	.	.	.	.	.	.
gene11577	notch2.S	notch2	LS	.	.	.	.	X	.	.	.	.	.	.	e	.	.	.	.	.	.	.	.	.	.	.	.	.
gene11578	prr5.L	prr5	L	X	.	.	.	X	.	.	.	.	.	e	e	.	.	.	.	.	.	.	.	.	.	.	.	.
gene11579	gng12.L	gng12	LS	X	.	.	.	X	.	.	.	.	.	.	e	.	.	.	.	.	.	.	.	.	.	.	.	.
gene1158	.	.	.	.	.	.	.	.	.	.	.	.	.	.	.	.	.	.	.	.	.	.	.	.	.	.	.	.
gene11580	erc1.L	erc1	LS	X	.	.	.	.	.	.	.	.	.	.	.	.	.	.	.	.	.	.	.	.	.	.	.	.
gene11581	dock5.L	dock5	L	X	.	.	.	.	.	.	.	.	.	.	.	.	.	.	.	.	.	.	.	.	.	.	.	.
gene11582	.	.	.	X	.	.	.	X	.	D	.	.	.	e	e	.	.	.	.	.	.	.	.	.	.	.	e	.
gene11583	.	.	.	.	.	.	.	.	.	.	.	.	.	.	.	.	.	.	.	.	.	.	.	.	.	.	.	.
gene11584	myo19.S	myo19	S	X	.	.	.	.	.	.	.	.	.	.	.	.	.	.	.	.	.	.	.	.	.	.	.	.
gene11585	wnt8a.L	wnt8a	LS	.	.	X	X	X	.	D	ei	ei	.	ei	e	ei	.	.	.	.	.	.	.	.	e	.	.	.
gene11586	.	.	.	.	.	.	.	.	.	.	.	.	.	.	.	.	.	.	.	.	.	.	.	.	.	.	.	.
gene11587	.	.	.	.	.	.	.	.	.	.	.	.	.	.	.	.	.	.	.	.	.	.	.	.	.	.	.	.
gene11588	arf3.L	arf3	LS	X	.	.	.	.	.	.	.	.	.	.	.	.	.	.	.	.	.	.	.	.	.	.	.	.
gene11589	kbtbd7.S	kbtbd7	LS	X	.	.	.	.	.	.	.	.	.	.	.	.	.	.	.	.	.	.	.	.	.	.	.	.
gene1159	fads2.L	fads2	LS	.	.	.	.	X	.	.	.	.	.	.	e	.	.	.	.	.	.	.	.	.	.	.	.	.
gene11590	.	.	.	.	.	.	.	X	.	.	.	.	.	i	ei	.	.	.	.	.	.	.	.	.	.	.	.	.
gene11591	sfxn3.L	sfxn3	L	X	.	.	.	.	.	.	.	.	.	e	.	.	.	.	.	.	.	.	.	.	.	.	.	.
gene11592	.	.	.	.	.	.	.	.	.	.	.	.	.	.	.	.	.	.	.	.	.	.	.	.	.	.	.	.
gene11593	nlrc4.L	nlrc4	L	.	.	.	.	X	D	.	.	e	.	e	e	.	.	.	.	.	e	.	.	.	.	.	.	.
gene11594	.	.	.	.	.	.	.	.	.	.	.	.	.	.	.	.	.	.	.	.	.	.	.	.	.	.	.	.
gene11595	med24.L	med24	L	X	.	.	.	.	.	.	.	.	.	.	.	.	.	.	.	.	.	.	.	.	.	.	.	.
gene11596	mtcp1.L	mtcp1	L	X	.	.	.	.	.	.	.	.	.	.	.	.	.	.	.	.	.	.	.	.	.	.	.	.
gene11597	golga7b.L	golga7b	LS	X	.	.	.	.	.	.	.	.	.	.	.	.	.	.	.	.	.	.	.	.	.	.	.	.
gene11598	XB5870707.S [provisional]	XB5870707 [provisional]	S	.	.	.	.	.	.	.	.	.	.	.	.	.	.	.	.	.	.	.	.	.	.	.	.	.
gene11599	btf3l4.S	btf3l4	LS	X	X	.	X	X	.	U	i	i	i	i	ei	.	.	.	.	.	.	.	.	.	.	.	.	i
gene116	edrf1.S	edrf1	S	X	.	.	.	.	.	.	.	.	.	.	.	.	.	.	.	.	.	.	.	.	.	.	.	.
gene1160	XB5932841.S [provisional:cav2]	XB5932841 [provisional:cav2]	LS	.	.	.	.	.	.	.	.	.	.	.	.	.	.	.	.	.	.	.	.	.	.	.	.	.
gene11600	tmem37.S	tmem37	LS	X	.	.	.	.	.	U	.	.	e	e	.	.	.	.	.	.	.	.	.	.	.	.	.	e
gene11601	.	.	.	.	.	.	.	.	.	.	.	.	.	.	.	.	.	.	.	.	.	.	.	.	.	.	.	.
gene11602	ncoa3.S	ncoa3	S	X	.	.	.	.	.	.	.	.	.	.	.	.	.	.	.	.	.	.	.	.	.	.	.	.
gene11603	sec16b.L	sec16b	L	.	.	.	.	.	.	.	.	.	e	e	.	.	.	.	.	.	.	.	.	.	.	.	.	.
gene11604	.	.	.	.	.	.	.	.	.	.	.	.	.	.	.	.	.	.	.	.	.	.	.	.	.	.	.	.
gene11605	.	.	.	X	.	.	.	.	.	D	.	.	.	.	.	.	.	.	.	.	.	.	.	.	.	.	e	.
gene11606	zc2hc1c.S	zc2hc1c	S	X	.	.	.	X	D	.	.	.	e	.	e	.	.	.	.	.	.	.	.	.	.	.	.	.
gene11607	.	.	.	.	.	.	.	.	.	.	.	.	.	.	.	.	.	.	.	.	.	.	.	.	.	.	.	.
gene11608	selenos.L	selenos	LS	X	.	.	.	.	.	.	.	.	.	.	.	.	.	.	.	.	.	.	.	.	.	.	.	.
gene11609	.	.	.	.	.	.	.	.	.	.	.	.	.	.	.	.	.	.	.	.	.	.	.	.	.	.	.	.
gene1161	.	.	.	X	.	.	.	.	.	.	.	.	.	.	.	.	.	.	.	.	.	.	.	.	.	.	.	.
gene11610	nme6.S	nme6	LS	.	.	.	.	.	.	.	.	.	.	.	.	.	.	.	.	.	.	.	.	.	.	.	.	.
gene11611	recql.L	recql	L	X	.	.	.	.	.	.	.	.	.	.	.	.	.	.	.	.	.	.	.	.	.	.	.	.
gene11612	hdgfl2.L	hdgfl2	LS	X	.	.	.	.	.	.	.	.	.	.	.	.	.	.	.	.	.	.	.	.	.	.	.	.
gene11613	.	.	.	.	.	.	.	.	.	.	.	.	.	.	.	.	.	.	.	.	.	.	.	.	.	.	.	.
gene11614	pcmt1.L	pcmt1	L	X	.	.	.	.	.	.	.	.	.	.	.	.	.	.	.	.	.	.	.	.	.	.	.	.
gene11615	triobp.L	triobp	LS	X	.	.	.	.	.	.	.	.	.	.	.	.	.	.	.	.	.	.	.	.	.	.	.	.
gene11616	bspry.L	bspry	LS	X	.	X	X	X	U	D	i	i	.	i	ei	i	.	ei	.	i	.	ei	.	.	i	.	.	.
gene11617	txndc12.L	txndc12	LS	X	.	.	.	.	.	.	.	.	.	.	.	.	.	.	.	.	.	.	.	.	.	.	.	.
gene11618	c7orf57.L	c7orf57	L	X	.	.	.	.	.	U	.	.	.	e	.	.	.	.	.	.	.	.	.	.	.	.	.	e
gene11619	meltf.S	meltf	LS	.	.	.	.	.	.	.	.	.	.	.	.	.	.	.	.	.	.	.	.	.	.	.	.	.
gene1162	mapkbp1.S	mapkbp1	LS	X	.	.	.	.	.	D	.	.	.	.	.	.	.	.	.	.	.	.	.	.	.	.	e	.
gene11620	adamts4.L	adamts4	LS	.	.	.	.	.	.	.	.	.	.	.	.	.	.	.	.	.	.	.	.	.	.	.	.	.
gene11621	rfx3.L	rfx3	LS	X	.	.	.	.	.	.	.	.	.	.	.	.	.	.	.	.	.	.	.	.	.	.	.	.
gene11622	il1rap.L	il1rap	LS	.	.	.	.	X	.	.	.	.	.	e	e	.	.	.	.	.	.	.	.	.	.	.	.	.
gene11623	dgkq.L	dgkq	LS	X	.	.	.	.	.	.	.	.	.	.	.	.	.	.	.	.	.	.	.	.	.	.	.	.
gene11624	mylk.L	mylk	LS	X	.	.	.	.	.	.	.	.	.	.	.	.	.	.	.	.	.	.	.	.	.	.	.	.
gene11625	gpr22l.S	gpr22l	LS	X	.	.	.	.	.	.	.	.	.	e	.	.	.	.	.	.	.	.	.	.	.	.	.	.
gene11626	trpv3.S	trpv3	LS	.	.	.	.	.	.	.	.	.	.	.	.	.	.	.	.	.	.	.	.	.	.	.	.	.
gene11627	c8orf33.L	c8orf33	L	X	.	.	.	.	.	.	.	.	.	.	.	.	.	.	.	.	.	.	.	.	.	.	.	.
gene11628	rtp3a.3.S	rtp3a.3	LS	X	.	.	.	.	.	D	.	.	.	.	.	.	.	.	.	.	.	.	e	.	.	.	.	.
gene11629	ppm1b.L	ppm1b	LS	X	.	.	.	.	.	.	.	.	.	.	.	.	.	.	.	.	.	.	.	.	.	.	.	.
gene1163	polr3h.L	polr3h	L	X	.	.	.	.	.	.	.	.	.	.	.	.	.	.	.	.	.	.	.	.	.	.	.	.
gene11630	.	.	.	.	.	.	.	.	.	.	.	.	.	.	.	.	.	.	.	.	.	.	.	.	.	.	.	.
gene11631	nufip1.S	nufip1	LS	X	.	.	.	.	.	.	.	.	.	.	.	.	.	.	.	.	.	.	.	.	.	.	.	.
gene11632	.	.	.	X	.	.	.	.	.	.	.	.	.	.	.	.	.	.	.	.	.	.	.	.	.	.	.	.
gene11633	.	.	.	.	.	.	.	.	.	.	.	.	.	.	.	.	.	.	.	.	.	.	.	.	.	.	.	.
gene11634	cfap44.L	cfap44	L	X	.	.	.	X	.	.	.	.	.	.	e	.	.	.	.	.	.	.	.	.	.	.	.	.
gene11635	best2.L	best2	LS	X	.	.	.	.	.	.	.	.	.	.	.	.	.	.	.	.	.	.	.	.	.	.	.	.
gene11636	arfgef3.S	arfgef3	S	X	.	.	.	.	.	.	.	.	e	.	.	.	.	.	.	.	.	.	.	.	.	.	.	.
gene11637	crygdl.9.S	crygdl.9	LS	.	.	.	.	.	.	.	.	.	.	.	.	.	.	.	.	.	.	.	.	.	.	.	.	.
gene11638	.	.	.	X	.	.	X	.	.	.	i	i	.	i	.	.	.	.	.	.	.	.	.	.	.	.	.	.
gene11639	slco1a2.L	slco1a2	L	.	.	.	.	.	.	.	.	.	.	.	.	.	.	.	.	.	.	.	.	.	.	.	.	.
gene1164	c11orf96.L	c11orf96	LS	X	.	.	.	.	.	U	.	.	.	.	.	.	.	.	.	.	.	.	.	.	.	.	.	e
gene11640	arhgap44.L	arhgap44	LS	.	.	.	.	X	.	.	.	.	e	.	e	.	.	.	.	.	.	.	.	.	.	.	.	.
gene11641	madd.L	madd	LS	X	.	.	.	.	.	.	.	.	.	.	.	.	.	.	.	.	.	.	.	.	.	.	.	.
gene11642	.	.	.	.	.	.	.	.	.	.	.	.	.	.	.	.	.	.	.	.	.	.	.	.	.	.	.	.
gene11643	obp.S	obp	S	.	.	.	.	.	.	.	.	.	.	.	.	.	.	.	.	.	.	.	.	.	.	.	.	.
gene11644	dclk1.L	dclk1	L	.	.	.	.	.	.	.	.	.	.	.	.	.	.	.	.	.	.	.	.	.	.	.	.	.
gene11645	rrp8.L	rrp8	LS	X	.	.	.	.	U	.	i	.	.	i	.	.	.	.	.	.	.	i	.	.	.	.	.	.
gene11646	f7.S	f7	S	.	.	.	.	.	.	.	.	.	.	.	.	.	.	.	.	.	.	.	.	.	.	.	.	.
gene11647	fam32a.L	fam32a	L	X	.	.	X	X	.	.	i	i	.	i	e	.	.	.	.	.	.	.	.	.	.	.	.	.
gene11648	kcnh5.L	kcnh5	LS	X	.	.	.	.	.	.	.	.	.	e	.	.	.	.	.	.	.	.	.	.	.	.	.	.
gene11649	XB5962511.L [provisional:galr2]	XB5962511 [provisional:galr2]	LS	.	.	.	.	.	.	.	.	.	.	.	.	.	.	.	.	.	.	.	.	.	.	.	.	.
gene1165	golga7.S	golga7	LS	X	.	.	.	.	.	.	.	.	.	.	.	.	.	.	.	.	.	.	.	.	.	.	.	.
gene11650	top1.2.S	top1.2	S	X	.	.	.	.	.	.	.	.	.	.	.	.	.	.	.	.	.	.	.	.	.	.	.	.
gene11651	itga5.L	itga5	LS	X	.	.	.	X	U	.	.	.	.	.	e	.	.	.	.	.	.	e	.	.	.	.	.	.
gene11652	stx1b.L	stx1b	LS	.	.	.	.	.	.	.	.	.	.	.	.	.	.	.	.	.	.	.	.	.	.	.	.	.
gene11653	phf6.S	phf6	LS	X	.	.	.	.	D	.	.	.	.	.	.	.	.	.	e	.	.	.	.	.	.	.	.	.
gene11654	.	.	.	.	.	.	.	.	.	.	.	.	.	.	.	.	.	.	.	.	.	.	.	.	.	.	.	.
gene11655	kank1.L	kank1	LS	X	.	.	.	.	.	.	.	.	.	.	.	.	.	.	.	.	.	.	.	.	.	.	.	.
gene11656	nudt5.S	nudt5	LS	X	.	.	.	.	.	.	.	.	.	.	.	.	.	.	.	.	.	.	.	.	.	.	.	.
gene11657	mboat7.L	mboat7	L	X	.	.	.	.	.	.	.	.	.	.	.	.	.	.	.	.	.	.	.	.	.	.	.	.
gene11658	pdx1.L	pdx1	LS	.	.	.	.	.	.	.	.	.	.	.	.	.	.	.	.	.	.	.	.	.	.	.	.	.
gene11659	.	.	.	.	.	.	.	.	.	.	.	.	e	.	.	.	.	.	.	.	.	.	.	.	.	.	.	.
gene1166	tbx1.S	tbx1	LS	.	.	X	X	X	.	D	ei	i	.	ei	e	ei	.	.	.	.	.	.	.	.	ei	.	ei	.
gene11660	.	.	.	.	.	.	.	.	.	.	.	.	.	.	.	.	.	.	.	.	.	.	.	.	.	.	.	.
gene11661	rif1.S	rif1	S	X	.	.	.	.	.	.	.	.	.	.	.	.	.	.	.	.	.	.	.	.	.	.	.	.
gene11662	sec24b.L	sec24b	LS	X	.	.	.	.	.	.	.	.	.	.	.	.	.	.	.	.	.	.	.	.	.	.	.	.
gene11663	.	.	.	.	.	.	.	X	.	.	.	.	.	.	e	.	.	.	.	.	.	.	.	.	.	.	.	.
gene11664	fermt1.L	fermt1	LS	X	.	.	.	.	.	.	.	.	.	.	.	.	.	.	.	.	.	.	.	.	.	.	.	.
gene11665	tnk2l.S	tnk2l	LS	X	.	.	.	.	.	D	.	.	e	.	.	.	.	.	.	.	.	.	.	.	.	.	e	.
gene11666	gltpd2.S	gltpd2	LS	.	.	.	.	.	.	.	.	.	.	.	.	.	.	.	.	.	.	.	.	.	.	.	.	.
gene11667	gpc4.L	gpc4	LS	X	.	X	X	X	D	D	i	i	.	i	ei	i	.	i	i	.	.	.	i	.	i	.	i	.
gene11668	mllt6.S	mllt6	LS	X	.	.	.	.	.	.	.	.	.	.	.	.	.	.	.	.	.	.	.	.	.	.	.	.
gene11669	tprg1.L	tprg1	LS	X	.	.	.	.	.	.	.	.	.	.	.	.	.	.	.	.	.	.	.	.	.	.	.	.
gene1167	olfm1.S	olfm1	LS	X	.	.	.	.	.	.	.	.	.	e	.	.	.	.	.	.	.	.	.	.	.	.	.	.
gene11670	.	.	.	.	.	.	.	.	.	.	.	.	.	.	.	.	.	.	.	.	.	.	.	.	.	.	.	.
gene11671	jkamp.S	jkamp	LS	X	.	.	.	.	.	.	.	.	.	.	.	.	.	.	.	.	.	.	.	.	.	.	.	.
gene11672	clmn.S	clmn	LS	X	.	.	.	.	.	.	.	.	.	.	.	.	.	.	.	.	.	.	.	.	.	.	.	.
gene11673	slc9b2.S	slc9b2	LS	X	.	.	.	.	.	.	.	.	.	.	.	.	.	.	.	.	.	.	.	.	.	.	.	.
gene11674	sparc.L	sparc	LS	.	.	.	.	.	.	.	.	.	.	.	.	.	.	.	.	.	.	.	.	.	.	.	.	.
gene11675	sh3bgrl3.L	sh3bgrl3	LS	.	.	.	.	.	.	.	.	.	.	.	.	.	.	.	.	.	.	.	.	.	.	.	.	.
gene11676	pcid2.S	pcid2	LS	X	.	.	.	.	.	.	.	.	.	.	.	.	.	.	.	.	.	.	.	.	.	.	.	.
gene11677	actn4.S	actn4	LS	X	.	X	X	.	U	D	i	i	.	i	.	i	.	i	.	.	.	.	.	.	i	.	.	.
gene11678	unc119.L	unc119	L	X	.	.	.	.	.	.	.	.	.	.	.	.	.	.	.	.	.	.	.	.	.	.	.	.
gene11679	tmem178a.S	tmem178a	LS	.	.	.	.	.	.	.	.	.	.	.	.	.	.	.	.	.	.	.	.	.	.	.	.	.
gene1168	znf883l.S	znf883l	LS	X	.	.	.	.	.	.	.	.	.	.	.	.	.	.	.	.	.	.	.	.	.	.	.	.
gene11680	prr35.L	prr35	LS	.	.	.	.	.	.	.	.	.	.	.	.	.	.	.	.	.	.	.	.	.	.	.	.	.
gene11681	dmrt2.L	dmrt2	LS	.	.	.	.	.	U	D	i	.	.	ei	.	ei	.	ei	.	.	.	.	ei	.	ei	.	ei	.
gene11682	blzf1.L	blzf1	LS	X	.	.	X	.	.	.	i	i	.	i	.	.	.	.	.	.	.	.	.	.	.	.	.	.
gene11683	gpr132.S	gpr132	LS	.	.	.	.	.	.	.	.	.	.	.	.	.	.	.	.	.	.	.	.	.	.	.	.	.
gene11684	prph2l.L	prph2l	LS	.	.	.	.	.	.	.	.	.	.	.	.	.	.	.	.	.	.	.	.	.	.	.	.	.
gene11685	trim24.S	trim24	LS	X	X	.	X	X	U	.	i	i	i	i	ei	.	.	.	.	i	.	i	.	.	.	.	.	.
gene11686	mak16.L	mak16	LS	X	.	.	.	X	.	.	i	i	.	.	ei	.	.	.	.	.	.	.	.	.	.	.	.	.
gene11687	ap3d1.S	ap3d1	LS	X	.	.	.	.	.	.	.	.	.	.	.	.	.	.	.	.	.	.	.	.	.	.	.	.
gene11688	stt3b.L	stt3b	LS	X	.	.	.	.	.	.	.	.	.	.	.	.	.	.	.	.	.	.	.	.	.	.	.	.
gene11689	zbtb43.L	zbtb43	LS	X	.	.	.	.	.	.	.	.	.	.	.	.	.	.	.	.	.	.	.	.	.	.	.	.
gene1169	cnksr2.L	cnksr2	LS	X	.	.	.	.	.	.	.	.	.	.	.	.	.	.	.	.	.	.	.	.	.	.	.	.
gene11690	med1l.L	med1l	L	X	.	.	.	.	.	.	.	.	.	.	.	e	.	.	.	.	.	.	.	.	.	.	.	.
gene11691	fosb.S	fosb	LS	X	.	.	.	.	.	U	.	.	e	e	.	.	.	.	.	.	.	.	.	.	.	.	.	e
gene11692	.	.	.	.	.	.	.	.	.	.	.	.	.	.	.	.	.	.	.	.	.	.	.	.	.	.	.	.
gene11693	fbxo7.S	fbxo7	LS	X	.	.	.	.	.	.	.	.	.	.	.	.	.	.	.	.	.	.	.	.	.	.	.	.
gene11694	ufl1.L	ufl1	L	X	.	.	.	.	.	.	.	.	.	.	.	.	.	.	.	.	.	.	.	.	.	.	.	.
gene11695	ext2.S	ext2	LS	X	.	.	.	.	.	.	.	.	.	.	.	.	.	.	.	.	.	.	.	.	.	.	.	.
gene11696	krt78.3.S	krt78.3	LS	.	.	.	.	.	.	.	.	.	.	.	.	.	.	.	.	.	.	.	.	.	.	.	.	.
gene11697	.	.	.	X	.	X	X	.	D	D	ei	ei	.	ei	.	i	ei	.	ei	.	ei	.	.	.	.	.	i	.
gene11698	.	.	.	.	.	.	.	.	.	.	.	.	.	.	.	.	.	.	.	.	.	.	.	.	.	.	.	.
gene11699	vash2.L	vash2	LS	.	.	.	.	.	.	.	.	.	.	.	.	.	.	.	.	.	.	.	.	.	.	.	.	.
gene117	timm17b.S	timm17b	S	X	.	.	.	.	.	.	.	.	.	.	.	.	.	.	.	.	.	.	.	.	.	.	.	.
gene1170	ypel2.L	ypel2	L	X	.	.	.	.	.	.	.	.	.	.	.	.	.	.	.	.	.	.	.	.	.	.	.	.
gene11700	ppig.S	ppig	LS	X	.	.	X	X	.	.	i	i	.	i	ei	.	.	.	.	.	.	.	.	.	.	.	.	.
gene11701	ralb.S	ralb	LS	X	X	.	X	X	.	.	i	i	i	i	ei	.	.	.	.	.	.	.	.	.	.	.	.	.
gene11702	adi1.S	adi1	LS	.	.	.	.	.	.	.	.	.	.	.	.	.	.	.	.	.	.	.	.	.	.	.	.	.
gene11703	.	.	.	.	.	.	.	.	.	.	.	.	.	e	.	.	.	.	.	.	.	.	.	.	.	.	.	.
gene11704	plxnb3.S	plxnb3	S	X	.	.	.	.	.	.	.	.	.	.	.	.	.	.	.	.	.	.	.	.	.	.	.	.
gene11705	arl14ep.S	arl14ep	LS	X	.	.	.	.	.	.	.	.	.	.	.	.	.	.	.	.	.	.	.	.	.	.	.	.
gene11706	.	.	.	.	.	.	.	.	.	.	.	.	.	.	.	.	.	.	.	.	.	.	.	.	.	.	.	.
gene11707	armh1.L	armh1	L	X	.	.	.	.	.	.	.	.	.	.	.	.	.	.	.	.	.	.	.	.	.	.	.	.
gene11708	.	.	.	.	.	.	.	.	.	.	.	.	.	.	.	.	.	.	.	.	.	.	.	.	.	.	.	.
gene11709	g6pc1.3.L	g6pc1.3	LS	.	.	.	.	.	.	.	.	.	.	.	.	.	.	.	.	.	.	.	.	.	.	.	.	.
gene1171	gpcpd1.L	gpcpd1	LS	X	.	.	.	.	.	.	.	.	.	.	.	.	.	.	.	.	.	.	.	.	.	.	.	.
gene11710	birc2.S	birc2	LS	X	.	X	X	X	.	D	i	i	.	ei	ei	i	.	.	.	.	.	.	.	.	i	.	i	.
gene11711	coro6.S	coro6	LS	X	.	.	.	X	.	U	.	.	.	.	e	.	.	.	.	.	.	.	.	.	.	.	.	e
gene11712	snapc3.L	snapc3	LS	X	.	.	.	.	.	.	.	.	.	.	.	.	.	.	.	.	.	.	.	.	.	.	.	.
gene11713	slc28a3.L	slc28a3	L	.	.	.	.	X	.	.	.	.	.	.	e	.	.	.	.	.	.	.	.	.	.	.	.	.
gene11714	ppp1r16b.S	ppp1r16b	LS	.	.	.	.	.	.	.	.	.	.	.	.	.	.	.	.	.	.	.	.	.	.	.	.	.
gene11715	crnkl1.L	crnkl1	LS	.	.	.	.	.	.	.	.	.	.	.	.	.	.	.	.	.	.	.	.	.	.	.	.	.
gene11716	gucy2c.L	gucy2c	LS	.	.	.	.	.	.	.	.	.	.	.	.	.	.	.	.	.	.	.	.	.	.	.	.	.
gene11717	tmem177.L	tmem177	L	X	.	.	.	.	.	.	.	.	.	.	.	.	.	.	.	.	.	.	.	.	.	.	.	.
gene11718	tollip.S	tollip	LS	X	.	.	.	.	.	.	.	.	.	.	.	.	.	.	.	.	.	.	.	.	.	.	.	.
gene11719	zmynd12.L	zmynd12	L	X	.	.	.	.	.	.	.	.	.	.	.	.	.	.	.	.	.	.	.	.	.	.	.	.
gene1172	.	.	.	.	.	.	.	.	.	.	.	.	.	.	.	.	.	.	.	.	.	.	.	.	.	.	.	.
gene11720	afg3l1p.S	afg3l1p	S	X	.	.	.	.	.	.	.	.	.	.	.	.	.	.	.	.	.	.	.	.	.	.	.	.
gene11721	grik5.L	grik5	LS	.	.	.	.	.	.	.	.	.	.	.	.	.	.	.	.	.	.	.	.	.	.	.	.	.
gene11722	gzma.S	gzma	LS	.	.	.	.	.	.	.	.	.	.	.	.	.	.	.	.	.	.	.	.	.	.	.	.	.
gene11723	ttc27.L	ttc27	L	X	.	.	.	.	.	.	.	.	.	.	.	.	.	.	.	.	.	.	.	.	.	.	.	.
gene11724	cbr1.1.S	cbr1.1	LS	X	.	.	.	.	U	.	.	.	.	.	.	.	.	ei	.	ei	.	ei	.	.	.	.	.	.
gene11725	ntn4.L	ntn4	LS	.	.	.	.	.	.	.	.	.	.	.	.	.	.	.	.	.	.	.	.	.	.	.	.	.
gene11726	.	.	.	.	.	.	.	X	.	.	.	.	.	e	e	.	.	.	.	.	.	.	.	.	.	.	.	.
gene11727	zc3h7b.S	zc3h7b	LS	X	.	.	.	X	.	.	.	.	.	.	e	.	.	.	.	.	.	.	.	.	.	.	.	.
gene11728	glcci1.L	glcci1	LS	X	.	.	.	.	.	.	.	.	e	.	.	.	.	.	.	.	.	.	.	.	.	.	.	.
gene11729	eif3i.S	eif3i	LS	X	.	.	X	.	.	.	i	i	.	i	.	.	.	.	.	.	.	.	.	.	.	.	.	.
gene1173	dnajc8.L	dnajc8	LS	X	.	.	.	.	.	.	.	.	.	.	.	.	.	.	.	.	.	.	.	.	.	.	.	.
gene11730	klhl32.S	klhl32	LS	.	.	.	.	.	.	.	.	.	.	.	.	.	.	.	.	.	.	.	.	.	.	.	.	.
gene11731	pgp.L	pgp	LS	X	.	.	.	.	.	.	.	.	.	.	.	.	.	.	.	.	.	.	.	.	.	.	.	.
gene11732	arfgap1.L	arfgap1	LS	X	.	.	.	.	.	.	.	.	.	.	.	.	.	.	.	.	.	.	.	.	.	.	.	.
gene11733	vip.S	vip	LS	.	.	.	.	.	.	.	.	.	.	.	.	.	.	.	.	.	.	.	.	.	.	.	.	.
gene11734	rab44.L	rab44	L	.	.	.	.	.	.	.	.	.	.	e	.	.	.	.	.	.	.	.	.	.	.	.	.	.
gene11735	tspyl2.S	tspyl2	LS	X	.	.	.	.	.	.	.	.	.	.	.	.	.	.	.	.	.	.	.	.	.	.	.	.
gene11736	rac1.L	rac1	L	X	X	X	X	X	U	D	i	i	i	i	e	i	.	i	.	.	.	.	.	.	i	.	.	.
gene11737	haus6.L	haus6	LS	X	.	.	.	.	.	.	.	.	.	.	.	.	.	.	.	.	.	.	.	.	.	.	.	.
gene11738	.	.	.	.	.	.	.	X	.	.	.	.	.	.	e	.	.	.	.	.	.	.	.	.	.	.	.	.
gene11739	.	.	.	.	.	.	.	.	.	.	.	.	.	.	.	.	.	.	.	.	.	.	.	.	.	.	.	.
gene1174	angpt4.2.S	angpt4.2	LS	X	.	.	.	X	D	.	.	.	e	e	e	.	e	.	.	.	.	.	.	.	.	.	.	.
gene11740	.	.	.	.	.	.	.	.	.	.	.	.	e	e	.	.	.	.	.	.	.	.	.	.	.	.	.	.
gene11741	mgat4c.S	mgat4c	LS	.	.	.	.	.	.	.	.	.	.	.	.	.	.	.	.	.	.	.	.	.	.	.	.	.
gene11742	.	.	.	.	.	.	.	.	.	.	.	.	.	.	.	.	.	.	.	.	.	.	.	.	.	.	.	.
gene11743	frs2.S	frs2	LS	X	X	X	X	X	.	D	i	i	e	i	ei	i	.	.	.	.	.	.	i	.	i	.	.	.
gene11744	dnal1.L	dnal1	L	X	.	.	.	.	.	.	.	.	.	.	.	.	.	.	.	.	.	.	.	.	.	.	.	.
gene11745	.	.	.	X	.	.	.	.	.	.	.	.	e	.	.	.	.	.	.	.	.	.	.	.	.	.	.	.
gene11746	prr5l.S	prr5l	LS	.	.	.	X	.	.	.	ei	i	.	ei	.	.	.	.	.	.	.	.	.	.	.	.	.	.
gene11747	tc2n.L	tc2n	LS	X	.	.	.	.	.	.	.	.	.	.	.	.	.	.	.	.	.	.	.	.	.	.	.	.
gene11748	eif1ad.L	eif1ad	L	X	X	.	X	.	.	.	i	i	i	i	.	.	.	.	.	.	.	.	.	.	.	.	.	.
gene11749	slc30a6.S	slc30a6	LS	X	.	.	.	.	.	.	.	.	.	.	.	.	.	.	.	.	.	.	.	.	.	.	.	.
gene1175	vgll4.S	vgll4	LS	X	.	X	X	X	U	D	i	i	.	i	i	i	.	i	.	i	.	i	.	.	i	.	i	.
gene11750	vrk1.S	vrk1	LS	X	X	.	X	X	D	.	i	i	i	i	i	.	.	.	.	.	e	.	.	.	.	.	.	.
gene11751	wdr75.L	wdr75	LS	X	.	.	.	.	.	.	.	.	.	.	.	.	.	.	.	.	.	.	.	.	.	.	.	.
gene11752	.	.	.	.	.	.	.	.	.	.	.	.	.	.	.	.	.	.	.	.	.	.	.	.	.	.	.	.
gene11753	nsmf.S	nsmf	LS	X	.	.	.	.	.	.	.	.	.	.	.	.	.	.	.	.	.	.	.	.	.	.	.	.
gene11754	.	.	.	X	.	.	.	X	.	.	.	.	e	e	e	.	.	.	.	.	.	.	.	.	.	.	.	.
gene11755	.	.	.	X	.	.	.	.	.	.	.	.	.	.	.	.	.	.	.	.	.	.	.	.	.	.	.	.
gene11756	nhlrc3.S	nhlrc3	S	X	.	.	.	.	.	.	.	.	.	.	.	.	.	.	.	.	.	.	.	.	.	.	.	.
gene11757	cibar1.S	cibar1	LS	X	.	.	.	X	.	.	i	.	i	i	i	.	.	.	.	.	.	.	.	.	.	.	.	.
gene11758	borcs6.S	borcs6	LS	X	.	.	.	.	.	.	.	.	.	.	.	.	.	.	.	.	.	.	.	.	.	.	.	.
gene11759	rcbtb1.L	rcbtb1	LS	X	.	.	.	.	.	.	.	.	.	.	.	.	.	.	.	.	.	.	.	.	.	.	.	.
gene1176	sema3f.S	sema3f	LS	X	X	X	X	X	D	D	i	i	i	i	ei	i	i	.	i	.	i	.	i	.	i	.	i	.
gene11760	usp54.L	usp54	L	X	.	.	.	.	.	.	.	.	.	e	.	.	.	.	.	.	.	.	.	.	.	.	.	.
gene11761	katnb1.S	katnb1	LS	X	.	.	X	.	.	.	i	i	.	i	.	.	.	.	.	.	.	.	.	.	.	.	.	.
gene11762	akr1b1.L	akr1b1	LS	X	.	.	.	.	.	.	.	.	.	.	.	.	.	.	.	.	.	.	.	.	.	.	.	.
gene11763	.	.	.	.	.	.	.	.	.	.	.	.	.	.	.	.	.	.	.	.	.	.	.	.	.	.	.	.
gene11764	.	.	.	.	.	.	.	.	.	.	.	.	.	.	.	.	.	.	.	.	.	.	.	.	.	.	.	.
gene11765	igsf10.L	igsf10	LS	.	.	.	.	.	.	.	.	.	.	.	.	.	.	.	.	.	.	.	.	.	.	.	.	.
gene11766	.	.	.	.	.	.	.	.	.	D	.	.	e	.	.	.	.	.	.	.	.	.	.	.	.	.	e	.
gene11767	wdr26.L	wdr26	LS	X	.	.	.	.	.	.	.	.	.	.	.	.	.	.	.	.	.	.	.	.	.	.	.	.
gene11768	abcg2.L	abcg2	LS	X	.	.	.	.	D	.	.	.	.	.	.	e	.	.	.	.	e	.	.	.	.	.	.	.
gene11769	.	.	.	.	.	.	.	.	.	.	.	.	.	.	.	.	.	.	.	.	.	.	.	.	.	.	.	.
gene1177	gsn.S	gsn	LS	X	.	.	.	.	.	.	.	.	.	.	.	.	.	.	.	.	.	.	.	.	.	.	.	.
gene11770	dagla.L	dagla	LS	X	.	.	.	.	.	.	.	.	.	.	.	.	.	.	.	.	.	.	.	.	.	.	.	.
gene11771	tlr6.L	tlr6	L	.	.	.	.	.	.	.	.	.	.	.	.	.	.	.	.	.	.	.	.	.	.	.	.	.
gene11772	ptmap12.S	ptmap12	LS	X	X	X	X	X	.	D	ei	ei	e	ei	e	i	.	.	.	.	.	.	i	.	i	.	i	.
gene11773	sfpq.S	sfpq	LS	X	X	X	X	X	.	D	i	i	i	i	ei	i	.	.	.	.	.	.	i	.	i	.	i	.
gene11774	clic3.S	clic3	LS	X	.	.	.	.	.	.	.	.	.	.	.	.	.	.	.	.	.	.	.	.	.	.	.	.
gene11775	scg5.S	scg5	LS	.	.	.	.	.	.	.	.	.	.	.	.	.	.	.	.	.	.	.	.	.	.	.	.	.
gene11776	nme3.L	nme3	LS	X	.	.	.	.	.	.	.	.	e	e	.	.	.	.	.	.	.	.	.	.	.	.	.	.
gene11777	apmap.L	apmap	L	X	.	.	.	.	.	.	.	.	.	.	.	.	.	.	.	.	.	.	.	.	.	.	.	.
gene11778	spata18a.L	spata18a	LS	.	.	.	.	.	.	.	.	.	.	.	.	.	.	.	.	.	.	.	.	.	.	.	.	.
gene11779	adrm1.S	adrm1	LS	X	.	.	.	.	.	.	.	.	.	.	.	.	.	.	.	.	.	.	.	.	.	.	.	.
gene1178	chmp1b.S	chmp1b	LS	X	.	X	X	.	U	.	i	i	.	i	.	i	.	.	.	.	.	i	.	.	.	.	.	.
gene11780	oxa1l.S	oxa1l	LS	X	.	.	.	.	.	.	.	.	.	.	.	.	.	.	.	.	.	.	.	.	.	.	.	.
gene11781	.	.	.	X	.	.	.	.	.	.	.	.	.	.	.	.	.	.	.	.	.	.	.	.	.	.	.	.
gene11782	leng8.L	leng8	LS	X	X	.	X	X	.	.	i	i	i	i	i	.	.	.	.	.	.	.	.	.	.	.	.	.
gene11783	sgcd.S	sgcd	LS	.	.	.	.	.	.	.	.	.	.	.	.	.	.	.	.	.	.	.	.	.	.	.	.	.
gene11784	lrrk1.L	lrrk1	L	X	.	.	.	.	.	D	.	.	.	.	.	.	.	.	.	.	.	.	.	.	.	.	e	.
gene11785	.	.	.	.	.	.	.	.	.	.	.	.	.	.	.	.	.	.	.	.	.	.	.	.	.	.	.	.
gene11786	gid4.S	gid4	LS	X	.	.	X	.	.	.	i	i	.	i	.	.	.	.	.	.	.	.	.	.	.	.	.	.
gene11787	nudt15.L	nudt15	L	.	.	.	.	X	.	.	.	.	e	e	e	.	.	.	.	.	.	.	.	.	.	.	.	.
gene11788	eif3i.L	eif3i	LS	X	.	.	.	X	.	.	i	.	.	i	i	.	.	.	.	.	.	.	.	.	.	.	.	.
gene11789	vma21.L	vma21	L	X	.	.	.	.	.	.	.	.	.	.	.	.	.	.	.	.	.	.	.	.	.	.	.	.
gene1179	hus1.L	hus1	L	X	.	.	.	.	.	U	.	.	e	.	.	.	.	.	.	.	.	.	.	.	.	.	.	e
gene11790	.	.	.	X	.	.	.	.	.	.	.	.	.	.	.	.	.	.	.	.	.	.	.	.	.	.	.	.
gene11791	opn6a.S	opn6a	LS	.	.	.	.	X	.	D	.	.	e	.	e	.	.	.	.	.	.	.	.	.	.	.	e	.
gene11792	dab2.S	dab2	LS	.	.	.	.	.	.	.	.	.	.	.	.	.	.	.	.	.	.	.	.	.	.	.	.	.
gene11793	XB1000829.S [provisional]	XB1000829 [provisional]	S	.	.	.	.	.	.	.	.	.	.	.	.	.	.	.	.	.	.	.	.	.	.	.	.	.
gene11794	vps45.S	vps45	S	X	.	.	.	.	.	.	.	.	.	.	.	.	.	.	.	.	.	.	.	.	.	.	.	.
gene11795	kiaa1522.S	kiaa1522	LS	X	.	.	X	X	U	D	i	i	.	i	ei	.	.	i	.	i	.	i	.	.	i	.	.	.
gene11796	ube3b.S	ube3b	LS	X	.	.	.	X	.	.	.	.	.	.	e	.	.	.	.	.	.	.	.	.	.	.	.	.
gene11797	gfm2.L	gfm2	L	X	.	.	.	.	.	.	.	.	.	.	.	.	.	.	.	.	.	.	.	.	.	.	.	.
[truncated: 47,581 more rows]

## Sheet: B. LS pairs v9.2 lfc
Gene	Homeo_status	Homeo_activation	Geneid.L	Maternal.L	Confident_activated_s8.L	Confident_firstwave_s9.L	Confident_activated_s9.L	Confident_activated_s10.5.L	PouSox_effect.L	CHX_PouSox_effect.L	Geneid.S	Maternal.S	Confident_activated_s8.S	Confident_firstwave_s9.S	Confident_activated_s9.S	Confident_activated_s10.5.S	PouSox_effect.S	CHX_PouSox_effect.S	Lfc_s8_vs_s5_feature	Lfc_s8_vs_s5.L	Lfc_s8_vs_s5.S	Lfc_s9_chx_vs_trip_feature	Lfc_s9_chx_vs_trip.L	Lfc_s9_chx_vs_trip.S	Lfc_s9_dmso_vs_trip_feature	Lfc_s9_dmso_vs_trip.L	Lfc_s9_dmso_vs_trip.S	Lfc_s9_gfp_mo_vs_pps_mo.L	Lfc_s9_gfp_mo_vs_pps_mo.S	Lfc_s9_gfp_mo_vs_trip.L	Lfc_s9_gfp_mo_vs_trip.S	Lfc_s9_pps_mo_vs_trip.L	Lfc_s9_pps_mo_vs_trip.S	Lfc_s9_chx_gfp_mo_vs_pps_mo.L	Lfc_s9_chx_gfp_mo_vs_pps_mo.S	Lfc_s9_chx_gfp_mo_vs_trip.L	Lfc_s9_chx_gfp_mo_vs_trip.S	Lfc_s9_chx_pps_mo_vs_trip.L	Lfc_s9_chx_pps_mo_vs_trip.S
neurl1b	LS	Lon	gene6314	.	.	X	X	X	D	D	gene8256	M	.	.	.	.	.	.	i	4.253	0	i	12.156	0	i	12.996	0	0.884	0	12.407	0	11.523	0	2.357	0	12.341	0	9.017	0
pheta2	LS	Lon	gene591	M	X	X	X	X	D	D	gene7411	M	.	.	.	.	.	.	i	3.253	0	i	7.288	0	i	10.512	0	1.095	0	10.708	0	9.613	0	0.892	0	7.25	0	4.794	0
ribc1	LS	Lon	gene34788	.	.	X	X	.	D	D	gene5288	.	.	.	.	.	.	.	i	2.81	0	i	6.914	0	i	10.492	0	0.648	0	9.915	0	9.267	0	0.273	0	4.408	0	4.226	0
gatm	LS	Lon	gene4078	.	.	X	X	X	D	D	gene16994	.	.	.	.	X	.	.	e	0.367	0	i	6.558	0	i	10.453	0	6.104	0	10.028	0	3.924	0	4.4	0	5.846	0	1.637	0
hkdc1	LS	Lon	gene41984	.	.	X	X	X	D	D	gene43013	M	.	.	.	X	.	.	e	0.087	1.971	i	9.218	0	i	10.154	0	2.747	0	9.944	0	7.198	0	3.161	0	8.008	0	5.436	0
p2ry2	LS	Lon	gene3325	.	.	X	X	X	D	D	gene362	.	.	.	.	.	.	.	i	0	0	i	4.864	0	i	10.07	0	1.802	0	10.275	0	8.473	0	6.47	0	2.636	0	-1.39	0
chst9l.3	LS	Lon	gene175	.	.	.	X	X	D	.	gene37090	.	.	.	.	.	.	.	i	0	0	e	0.669	0.218	i	10.01	0	0.651	0	9.781	0	9.13	0	2.46	0	0.618	-5.471	-2.77	-5.109
cxcl12	LS	Lon	gene6702	.	.	X	X	X	D	D	gene39690	M	.	.	.	X	D	.	i	3.253	0	i	10.864	0	i	9.802	0	5.217	0	10.913	0	5.696	0	2.444	0	11.481	0	8.093	0
clcf1	LS	Lon	gene40211	.	.	.	X	X	U	.	gene2751	.	.	.	.	.	.	.	e	0.962	0	e	2.563	0	i	9.696	0	-0.699	0	9.432	0	10.131	0	1.61	0	1.305	0	0.82	0
ror2	LS	Lon	gene136	.	.	X	X	X	U	D	gene9701	.	.	.	.	X	.	.	i	0	0	i	8.822	0	i	9.609	0	0.568	0	9.318	0	8.751	0	6.612	0	6.852	0	1.637	0
cdk9	LS	Lon	gene5684	M	X	X	X	X	D	D	gene35538	M	.	.	.	.	.	.	i	2.395	0	i	6.193	0	i	9.6	0	0.463	0	9.66	0	9.197	0	0.467	0	4.602	0	3.898	0
stc1	LS	Lon	gene19796	M	X	X	X	X	.	.	gene11547	M	.	.	.	.	.	.	e	1.502	0	i	5.608	0	i	9.535	0	0.643	0	10.507	0	9.865	0	0.824	0	6.235	0	4.108	0
pdgfa	LS	Lon	gene1392	.	.	X	X	X	.	D	gene20335	M	.	.	.	X	D	.	i	4.253	0	i	8.141	0	i	9.486	0	0.65	0	7.827	0	7.177	0	1.406	0	7.723	0	6.562	0
cbarp	LS	Lon	gene16728	.	.	X	X	.	D	.	gene47350	.	.	.	.	X	.	.	e	0	0.523	i	4.261	0	i	9.404	0	8.92	0	9.203	0	0.283	0	1.46	0	2.318	0	-0.765	0
dgka	LS	Lon	gene11416	M	.	X	X	X	D	D	gene9417	.	.	.	.	.	.	.	e	0	8.007	i	6.394	0	i	9.215	0	4.768	0	9.256	0	4.488	0	7.26	0	6.499	0	-0.766	0
pgbd5	LS	Lon	gene41591	.	.	X	X	.	U	D	gene49997	M	.	.	.	.	.	.	e	0.368	0.885	i	7.093	0	i	9.172	0	-0.303	0	9.764	0	10.067	0	1.634	0	7.341	0	5.621	0
slc16a3	LS	Lon	gene3254	M	.	X	X	X	D	D	gene46264	M	.	.	.	.	.	D	i	1.033	0	i	5.361	0	i	9.171	0	2.573	0	9.984	0	7.411	0	2.425	0	4.138	0	2.533	0
dipk1a	LS	Lon	gene13086	M	.	X	X	.	D	D	gene19729	M	.	.	.	.	.	.	i	0.638	0	i	4.82	0	i	9.081	0	1.336	0	7.699	0	6.363	0	2.803	0	4.503	0	2.406	0
palm2akap2	LS	Lon	gene10756	.	.	X	X	X	D	D	gene17543	.	.	.	.	X	D	D	e	0.225	0.367	i	7.534	0	i	9.079	0	3.469	0	10.782	0	7.313	0	1.718	0	6.666	0	5	0
ckm	LS	Lon	gene7639	M	.	X	X	X	U	.	gene12094	.	.	.	.	.	.	.	i	4.254	0	i	6.002	0	i	9.023	0	-1.159	0	9.123	0	10.283	0	-0.943	0	3.342	0	1.637	0
ptch2	LS	Both	gene16896	.	.	X	X	X	D	D	gene36500	.	.	X	X	X	.	D	e	0	3.394	i	9.189	0	i	8.998	0	2.441	0	9.991	0	7.55	0	4.218	0	7.033	0	4.125	0
arhgap4	LS	unk	gene35712	.	.	.	X	.	U	.	gene49259	.	.	.	.	.	.	.	i	3.253	0	i	4.272	0	i	8.865	0	0.088	0	10.382	0	10.293	0	0.498	0	4.568	0	1.637	0
sh2d3c	LS	Lon	gene3181	.	.	X	X	X	D	D	gene40246	.	.	.	.	.	.	.	i	0	0	i	8.123	0	i	8.825	0	0.816	0	9.832	0	9.016	0	2.821	0	7.688	0	5.336	0
relt	LS	Lon	gene13395	.	X	X	X	X	U	D	gene3040	.	.	.	.	X	.	.	i	4.838	0	i	8.803	0	i	8.807	0	-2.504	0	8.035	0	10.539	0	1.353	0	8.785	0	7.12	0
akap12	LS	Lon	gene49322	.	.	X	X	X	D	D	gene11524	M	.	.	.	X	.	.	i	0	0	i	5.678	0	i	8.792	0	4.034	0	9.901	0	5.867	0	2.04	0	5.27	0	2.899	0
foxa1	LS	Lon	gene2352	.	.	X	X	X	.	D	gene13000	.	.	.	.	X	.	.	e	1.81	1.157	i	7.457	0	i	8.789	0	-0.101	0	7.337	0	7.438	0	5.909	0	6.079	0	0	0
cd99l2	LS	Lon	gene45060	.	.	X	X	X	D	D	gene7769	.	.	.	.	X	.	.	i	4.252	0	i	5.955	0	i	8.778	0	1.368	0	8.425	0	7.056	0	3.236	0	4.611	0	1.822	0
gprc5cl1	LS	Lon	gene16682	.	.	X	X	X	D	D	gene4914	M	.	.	.	.	.	.	i	0	0	e	5.482	0.43	i	8.693	0	1.709	0	9.256	0	7.547	0	1.593	0.022	4.566	1.026	2.529	-0.237
bmp7.2	LS	Lon	gene4112	M	X	X	X	X	.	D	gene12065	M	.	.	.	.	.	.	i	3.225	0	i	4.431	0	i	8.593	0	0.008	0	9.311	0	9.303	0	0.773	0	3.448	0	3.053	0
stard13	LS	Both	gene11560	.	.	X	X	.	D	D	gene16024	M	.	.	X	X	.	D	i	4.253	0	i	4.739	0	i	8.576	0	2.146	0	8.718	0	6.572	0	7.369	0	3.56	0	-2.766	0
gpr143	LS	Lon	gene17355	M	X	X	X	X	D	.	gene10007	.	.	.	.	X	.	.	i	4.837	0	i	4.817	0	i	8.568	0	1.238	0	9.824	0	8.586	0	-3.151	0	4.569	0	3.846	0
tmem164	LS	Lon	gene34612	M	X	X	X	.	.	.	gene19815	.	.	.	.	.	.	.	e	0.385	4.844	i	5.52	0	i	8.468	0	-0.388	0	8.445	0	8.833	0	-0.816	0	4.117	0	4.093	0
cmtm8	LS	Lon	gene38832	M	.	X	X	X	.	D	gene16222	.	.	.	.	.	.	.	e	0.435	0	i	5.564	0	i	8.45	0	0.71	0	8.642	0	7.932	0	2.451	0	5.847	0	2.682	0
dcbld1	LS	Lon	gene44146	M	.	X	X	.	.	D	gene17494	M	.	.	.	.	D	.	i	1.073	0	i	5.689	0	i	8.446	0	0.456	0	9.061	0	8.604	0	2.639	0	5.819	0	2.87	0
slc2a2	LS	Lon	gene16187	M	X	X	X	X	D	D	gene9524	.	.	.	.	X	.	.	e	0.881	1.481	i	8.353	0	i	8.406	0	1.428	0	9.79	0	8.363	0	3.781	0	7.502	0	4.346	0
rassf7	LS	Lon	gene45557	M	.	X	X	X	U	D	gene16858	M	.	.	.	.	.	.	i	3.253	0	i	5.439	0	i	8.388	0	-0.46	0	8.859	0	9.319	0	0.807	0	5.18	0	4.093	0
timp-1	LS	Lon	gene7813	M	X	.	X	.	U	.	gene17808	.	.	.	.	.	.	.	e	3.42	2.811	i	2.808	0	i	8.378	0	-1.201	0	9.403	0	10.605	0	0	0	0	0	0	0
fhdc1	LS	Lon	gene374	M	.	X	X	.	D	D	gene3437	M	.	.	.	.	.	.	i	1.296	0	i	5.223	0	i	8.341	0	0.893	0	9.81	0	8.916	0	2.051	0	4.97	0	2.043	0
tll1	LS	Lon	gene197	.	.	X	X	X	.	D	gene49308	.	.	.	.	X	.	.	e	0	1.032	i	7.026	0	i	8.312	0	0.509	0	8.063	0	7.554	0	2.295	0	6.72	0	3.558	0
apln	LS	Lon	gene9953	.	X	X	X	X	D	D	gene50296	.	.	.	.	.	.	.	e	1.036	0	i	5.516	0	i	8.302	0	0.878	0	9.492	0	8.615	0	1.86	0	6.213	0	4.348	0
kcna3	LS	Both	gene42790	.	.	X	X	.	U	.	gene37753	.	.	X	X	.	.	.	e	4.253	0	i	6.031	0	i	8.301	0	-0.794	0	7.812	0	8.605	0	-0.81	0	5.564	0	4.534	0
flrt2	LS	Lon	gene12734	M	.	X	X	.	U	D	gene4024	.	.	.	.	.	.	.	i	0	0	i	9.193	0	i	8.214	0	-0.304	0	6.739	0	7.043	0	2.008	0	8.105	0	5.09	0
lysmd2	LS	Lon	gene17339	M	.	.	X	.	U	.	gene35352	M	.	.	.	.	.	.	e	0	0.491	i	0	0	i	8.19	0	-0.75	0	5.119	0	5.869	0	0.496	0	-0.104	0	-1.812	0
snx22	LS	Lon	gene9062	.	.	X	X	X	D	D	gene18390	M	.	.	.	.	.	.	i	0.368	0	i	6.346	0	i	8.024	0	1.847	0	6.689	0	4.842	0	2.445	0	6.9	0	4.048	0
zbtb21	LS	Lon	gene2941	M	.	.	X	.	.	.	gene3915	M	.	.	.	.	.	.	e	0.374	0.528	i	2.783	0	i	7.992	0	-0.453	0	7.912	0	8.365	0	-2.417	0	2.761	0	3.112	0
ptafr	LS	Lon	gene13059	.	.	.	X	X	D	.	gene6293	.	.	.	.	.	.	.	e	0.367	0	e	3.807	0	e	7.978	0	1.461	0	9.69	0	8.228	0	1.503	0	0	0	1.637	0
degs1	LS	Lon	gene11507	M	.	X	X	X	U	.	gene35126	M	.	.	.	.	.	.	i	3.253	0	i	4.375	0	i	7.971	0	-0.437	0	6.931	0	7.368	0	0.862	0	4.711	0	2.41	0
lrrn1	LS	Lon	gene18622	.	.	X	X	X	.	D	gene11799	.	.	.	.	X	U	.	i	0	0	i	6.956	0	i	7.938	0	0.198	0	7.184	0	6.986	0	3.798	0	6.899	0	0	0
rasgef1b	LS	Lon	gene49743	M	.	X	X	X	D	D	gene12474	M	.	.	.	.	.	D	i	3.252	0	i	9.328	0	i	7.919	0	2.812	0	8.743	0	5.931	0	2.756	0	9.117	0	5.97	0
mst1	LS	Lon	gene6691	.	X	.	X	X	U	.	gene4775	M	.	.	.	.	U	.	e	2.98	1.198	e	4.154	0	e	7.893	0	-1.552	-0.173	7.684	-0.616	9.236	-0.443	1.381	0.133	3.76	-0.275	4.344	-0.588
adam33	LS	Lon	gene16272	M	X	X	X	X	D	D	gene11311	.	.	.	.	.	.	.	e	1.056	4.391	i	6.786	0	i	7.826	0	0.544	0	6.723	0	6.179	0	2.912	0	7.03	0	2.318	0
osr2	LS	unk	gene11417	.	.	X	X	X	U	.	gene18007	.	.	.	.	X	.	.	i	0	0	i	6.483	0	i	7.762	0	-4.244	0	4.009	0	8.253	0	-0.433	0	5.351	0	4.129	0
nodal1	LS	Lon	gene13417	.	.	X	X	.	U	.	gene15653	M	.	.	.	.	U	.	e	0	0.478	e	6.199	3.017	e	9.013	1.255	-1.239	-2.058	7.96	0.25	9.198	2.308	2.494	-0.396	6.072	-1.429	1.637	-2.229
stag2	LS	Lon	gene13478	M	.	X	X	X	D	D	gene3186	M	.	.	.	X	.	.	i	0.81	0	i	5	0	i	7.753	0	0.998	0	8.284	0	7.285	0	1.64	0	5.23	0	2.993	0
itpka	LS	Lon	gene3315	.	.	X	X	X	.	D	gene8098	.	.	.	.	X	.	.	i	3.253	0	i	5.074	0	i	7.657	0	0.594	0	7.314	0	6.721	0	1.906	0	5.125	0	2.097	0
nipal2	LS	Lon	gene12940	M	.	.	X	X	D	.	gene14602	.	.	.	.	X	.	.	i	1.225	0	i	1.963	0	i	7.592	0	3.305	0	8.625	0	5.32	0	1.383	0	2.734	0	1.313	0
ag1	LS	Lon	gene3120	M	.	.	X	X	D	D	gene8814	.	.	.	.	X	.	.	i	0.367	0	e	0	3.856	i	7.508	0	8.605	0	9.368	0	0	0	2.913	3.775	1.412	3.793	-1.366	0
mig30	LS	Both	gene4038	.	X	.	X	X	U	U	gene41883	.	.	.	X	X	.	.	i	3.253	0	e	1.001	0	i	7.492	0	-1.342	0	7.273	0	8.615	0	-1.036	-0.279	0.183	-0.677	2.563	2.666
b3gnt7	LS	Lon	gene7668	M	.	X	X	X	.	D	gene35664	M	.	.	.	.	.	.	i	1.81	0	i	6.376	0	i	7.48	0	-0.569	0	7.47	0	8.039	0	2.845	0	7.219	0	3.532	0
alpl	LS	Lon	gene13568	.	.	X	X	X	U	D	gene11111	.	.	.	.	.	.	.	i	1.225	0	i	3.821	0	i	7.415	0	-0.077	0	7.117	0	7.194	0	0.869	0	3.774	0	2.411	0
tmem168	LS	Lon	gene13903	M	.	.	X	X	.	.	gene5907	M	.	.	.	.	.	.	i	0.811	0	i	1.364	0	i	7.394	0	-0.252	0	8.081	0	8.334	0	-1.128	0	2.634	0	3.41	0
slc22a4	LS	Lon	gene46124	M	X	X	X	X	U	.	gene11242	M	.	.	.	.	.	U	i	1.81	0	i	6.928	0	i	7.335	0	-0.981	0	8.69	0	9.671	0	2.057	0	6.09	0	3.533	0
cd63	LS	Lon	gene2818	M	X	X	X	X	.	.	gene5889	M	.	.	.	.	.	.	i	1.369	0	i	2.728	0	i	7.298	0	0.449	0	7.014	0	6.565	0	1.924	0	1.02	0	0.09	0
cidea	LS	Lon	gene8431	M	.	X	X	X	.	D	gene19758	M	.	.	.	.	.	.	e	0.062	0	i	4.729	0	i	7.29	0	0.64	0	7.483	0	6.843	0	3.077	0	2.771	0	-0.804	0
gprc5b	LS	Lon	gene8276	.	.	X	X	X	.	D	gene3873	.	.	.	.	X	.	.	i	3.252	0	i	6.324	0	i	7.278	0	0.99	0	7.034	0	6.044	0	0.816	0	6.147	0	4.117	0
slc6a16	LS	Lon	gene7205	.	.	X	X	X	.	D	gene8250	M	.	.	.	.	.	.	i	3.253	0	i	5.803	0	i	7.193	0	0.466	0	4.068	0	3.603	0	2.485	0	5.145	0	0.199	0
otx2	LS	Lon	gene5497	.	.	X	X	X	U	D	gene18552	M	.	.	.	X	.	D	i	0	0	e	8.723	1.776	e	7.063	0.004	-2.314	0.354	4.046	1.765	6.359	1.411	1.107	-0.602	8.441	0.327	6.373	1.861
acer2	LS	Lon	gene35665	M	.	X	X	X	.	D	gene20000	M	.	.	.	.	.	.	i	0.812	0	i	5.25	0	i	7.047	0	-0.325	0	5.73	0	6.055	0	1.575	0	3.9	0	3.684	0
osr1	LS	Lon	gene13927	.	.	.	X	X	U	.	gene11833	.	.	.	.	X	.	.	i	3.253	0	e	4.43	0	e	7.07	0.038	-1.817	-0.784	4.825	-1.705	6.642	-0.921	0	0.024	2.756	-6.886	0	-3.1
celf3	LS	Lon	gene42920	.	.	.	X	.	U	.	gene1562	.	.	.	.	.	.	.	i	3.253	0	i	0	0	i	6.999	0	-0.758	0	9.091	0	9.849	0	-2.822	0	-2.121	0	1.082	0
foxi1	LS	Both	gene3019	.	.	X	X	.	D	D	gene19800	.	.	X	X	X	D	D	i	0	0	e	2.505	6.918	i	6.992	0	2.16	0	5.845	0	3.685	0	0.321	5.14	2.596	7.234	2.512	0
slc25a29	LS	Lon	gene37982	.	.	X	X	X	U	D	gene11337	M	.	.	.	X	.	.	i	1.81	0	i	10.409	0	i	6.989	0	-2.719	0	7.306	0	10.025	0	1.624	0	9.004	0	8.188	0
ankrd13c	LS	Lon	gene4452	M	.	.	X	.	.	.	gene19736	M	.	.	.	.	.	.	i	0.967	0	i	3.541	0	i	6.976	0	0.015	0	7.317	0	7.302	0	1.613	0	2.899	0	2.408	0
cbx3	LS	Both	gene20281	M	.	X	X	X	D	D	gene10796	M	.	.	X	X	U	.	i	0.132	0.225	i	8.093	0.326	i	9.775	2.824	0.57	-1.451	10.192	2.35	9.622	3.801	2.868	0.604	7.416	-0.174	4.547	0.331
dcbld2	LS	Lon	gene5083	M	X	X	X	X	U	D	gene5298	M	.	.	.	X	.	.	i	1.641	0	i	6.017	0	i	6.91	0	-0.656	0	6.343	0	6.999	0	0.639	0	5.556	0	4.165	0
baiap2	LS	Lon	gene14404	M	.	X	X	.	U	D	gene1865	M	.	.	.	.	.	.	i	1.032	0	i	4.03	0	i	6.909	0	-1.011	0	2.987	0	3.999	0	2.236	0	4.071	0	0.502	0
tspan5	LS	Lon	gene13937	.	.	.	X	.	U	.	gene6755	M	.	.	.	.	.	U	i	4.252	0	i	2.948	0	i	6.905	0	-1.354	0	7.571	0	8.925	0	-1.718	0	2.636	0	2.41	0
ndufa4	LS	Lon	gene13296	M	.	X	X	.	D	.	gene41234	M	.	.	.	.	.	.	i	2.398	0	i	3.444	0	i	6.873	0	2.005	0	7.43	0	5.425	0	1.279	0	3.638	0	1.413	0
rsad2	LS	Lon	gene12462	.	.	.	X	.	U	.	gene19757	.	.	.	.	.	.	.	i	0	0	i	4.06	0	e	6.851	0	-2.602	0	5.535	0	8.137	0	1.459	0	3.743	0	0	0
rubcnl	LS	Lon	gene6750	M	.	X	X	.	U	D	gene17797	M	.	.	.	.	.	.	i	1.076	0	i	4.18	0	i	6.842	0	-0.393	0	7.317	0	7.71	0	1.458	0	4.408	0	2.636	0
tox3	LS	Lon	gene3215	M	.	.	X	X	D	.	gene36111	.	.	.	.	.	.	.	e	0.591	0	i	1.579	0	i	6.82	0	3.94	0	8.408	0	4.468	0	1.02	0	0.728	0	1.089	0
mdk	LS	Lon	gene48151	M	.	X	X	X	U	D	gene19164	M	.	.	.	X	.	.	e	0.357	0	i	2.588	0	i	6.793	0	0.392	0	4.471	0	4.079	0	3.719	0	1.898	0	-0.658	0
arl13b	LS	Lon	gene5395	M	.	X	X	X	D	D	gene37604	M	.	.	.	.	.	.	e	0.468	0.724	i	3.913	0	i	6.788	0	2.08	0	7.491	0	5.411	0	0.232	0	3.979	0	2.991	0
cnn3	LS	Lon	gene18444	M	X	X	X	X	.	D	gene9528	M	.	.	.	X	.	U	i	3.527	0	i	4.85	0	i	6.777	0	0.238	0	6.984	0	6.745	0	1.138	0	4.478	0	2.442	0
timm13	LS	Lon	gene12780	M	.	.	X	.	.	.	gene39015	M	.	.	.	.	.	.	i	1.808	0	i	3.14	0	i	6.75	0	0.213	0	7.449	0	7.236	0	-0.984	0	2.314	0	1.681	0
sdc2	LS	Lon	gene12838	M	.	X	X	X	U	D	gene13181	M	.	.	.	X	.	.	i	1.618	0	i	5.77	0	i	6.741	0	0.17	0	6.361	0	6.191	0	4.268	0	4.779	0	0.678	0
cdv3	LS	Lon	gene9651	M	.	X	X	.	.	.	gene8864	M	.	.	.	.	.	.	i	1.816	0	i	5.505	0	i	6.736	0	-0.498	0	6.213	0	6.712	0	-0.403	0	4.117	0	3.416	0
bcl2l10	LS	Lon	gene19323	.	.	.	X	.	.	.	gene13326	.	.	.	.	.	.	.	i	0	0	i	4.763	0	i	6.695	0	-0.918	0	5.377	0	6.295	0	-0.943	0	4.316	0	1.637	0
slc9a3r2	LS	Lon	gene50147	M	.	X	X	X	U	D	gene12788	.	.	.	.	X	.	.	i	0	0	i	5.559	0	i	6.693	0	-1.665	0	8.887	0	10.553	0	1.617	0	6.223	0	5.004	0
nrp2	LS	Lon	gene48372	M	X	X	X	X	D	D	gene43782	.	.	.	.	X	.	.	i	1.81	0	i	8.137	0	i	6.691	0	1.566	0	6.583	0	5.017	0	4.121	0	7.783	0	3.427	0
znf106	LS	Lon	gene35792	M	.	X	X	X	D	U	gene6394	M	.	.	.	.	.	.	i	0.033	0	i	1.633	0	i	6.689	0	1.373	0	7.471	0	6.098	0	-1.181	0	0.957	0	2.198	0
ccdc71	LS	Lon	gene18668	M	.	.	X	X	D	.	gene14672	M	.	.	.	.	.	.	i	1.812	0	i	1.346	0	i	6.684	0	1.332	0	7.767	0	6.435	0	-0.14	0	1.899	0	2.41	0
tnk2l	LS	Lon	gene20283	M	.	.	X	X	.	.	gene11665	M	.	.	.	.	.	D	e	0	1.763	i	0.372	0	i	6.676	0	0.359	0	7.701	0	7.343	0	-0.395	0	1.897	0	1.092	0
tspan13	LS	Lon	gene1520	M	X	X	X	X	.	D	gene45928	M	.	.	.	.	.	.	i	1.297	0	i	6.354	0	i	6.668	0	0.207	0	7.414	0	7.208	0	2.097	0	5.677	0	4.255	0
ankrd35	LS	Lon	gene37777	M	.	X	X	.	U	D	gene8675	.	.	.	.	.	.	.	i	0	0	i	2.685	0	i	6.668	0	-1.893	0	7.355	0	9.248	0	0.669	0	2.802	0	2.159	0
pmm2	LS	Lon	gene11852	M	X	X	X	X	.	D	gene10125	M	.	.	.	.	.	U	i	3.395	0	i	5.402	0	i	6.645	0	-0.242	0	6.123	0	6.365	0	1.654	0	5.532	0	3.677	0
mfsd11	LS	Lon	gene2219	M	.	.	X	.	D	.	gene5705	M	.	.	.	.	.	.	i	1	0	i	4.157	0	i	6.598	0	2.889	0	7.512	0	4.624	0	1.002	0	4.216	0	2.668	0
srp9	LS	Lon	gene9390	M	.	X	X	.	.	.	gene41179	M	.	.	.	.	.	.	e	0.071	0	i	4.053	0	i	6.588	0	-0.512	0	6.673	0	7.185	0	1	0	3.768	0	3.088	0
inhbb	LS	Lon	gene18873	.	.	X	X	.	U	D	gene13840	.	.	.	.	.	.	D	e	0.37	0	i	5.983	0	i	6.562	0	-0.926	0	5.404	0	6.329	0	6.061	0	6.399	0	0	0
wnt5b	LS	Lon	gene10101	.	X	X	X	X	U	D	gene5002	.	.	.	.	X	D	D	i	4.749	0	i	5.898	0	i	6.545	0	0.449	0	5.831	0	5.382	0	2.727	0	5.552	0	1.997	0
utp4	LS	Lon	gene19339	M	.	X	X	X	.	.	gene20011	M	.	.	.	.	.	.	i	1.292	0	i	4.806	0	i	6.541	0	-0.054	0	6.914	0	6.969	0	-0.287	0	3.708	0	2.785	0
ccnyl1	LS	Lon	gene14256	M	.	X	X	.	D	.	gene16209	M	.	.	.	.	.	.	i	0.894	0	i	2.134	0	i	6.523	0	1.929	0	6.072	0	4.143	0	-0.174	0	1.376	0	1.193	0
rgs3	LS	Lon	gene5594	M	.	X	X	X	.	D	gene14083	M	.	.	.	.	.	.	e	0	0.138	i	5.489	0	i	6.516	0	-0.712	0	4.799	0	5.511	0	5.972	0	5.85	0	0.087	0
mfsd2a	LS	Lon	gene1753	.	.	X	X	.	.	D	gene20105	M	.	.	.	X	.	.	i	0.366	0	i	6.612	0	i	6.495	0	-0.017	0	5.508	0	5.525	0	3.475	0	6.143	0	1.637	0
znf687	LS	Lon	gene49713	M	X	X	X	.	.	.	gene3132	M	.	.	.	.	.	.	e	0.988	0.381	i	6.692	0	i	6.425	0	-0.807	0	5.872	0	6.679	0	1.78	0	6.236	0	4.139	0
chp1	LS	Lon	gene6121	M	.	X	X	X	U	D	gene81	M	.	.	.	.	.	.	i	0.936	0	i	5.43	0	i	6.423	0	-0.56	0	5.071	0	5.631	0	0.644	0	5.291	0	2.801	0
mafa	LS	Lon	gene42716	.	.	X	X	.	.	D	gene38727	.	.	.	.	.	.	.	i	0	0	e	5.363	0	e	6.402	0	-1.299	0	3.574	0	4.872	0	3.219	0	3.773	0	1.093	0
s1pr5	LS	Lon	gene3734	M	.	X	X	X	D	D	gene396	M	.	.	.	X	.	.	i	0	0	i	7.661	0	i	6.394	0	4.224	0	7.847	0	3.623	0	4.349	0	7.469	0	3.783	0
hao2	LS	Lon	gene46403	.	.	.	X	X	U	.	gene17227	.	.	.	.	.	.	.	e	0.368	0	i	3.374	0	i	6.371	0	-1.943	0	8.206	0	10.149	0	3.46	0	1.757	0	0	0
nppc	LS	Lon	gene46470	.	.	.	X	.	.	.	gene37358	M	.	.	.	.	.	.	i	4.839	0	e	3.812	0.637	i	6.371	0	-0.62	0	4.451	0	5.07	0	0.657	1.532	4.325	0.894	2.512	1.712
ppp1r14a	LS	Lon	gene10079	M	.	X	X	.	D	.	gene9299	M	.	.	.	.	.	.	i	0.808	0	i	5.806	0	i	6.37	0	-1.607	0	6.498	0	8.105	0	0.912	0	1.322	0	3.667	0
rnf169	LS	Lon	gene183	M	.	.	X	.	U	.	gene6947	M	.	.	.	.	.	.	i	0.363	0.809	i	3.408	0.373	i	9.057	2.691	-1.128	-1.255	6.454	3.483	7.582	4.738	-2.83	-0.234	4.072	-2.699	3.525	1.665
grk5l	LS	Lon	gene34860	M	X	X	X	X	.	D	gene12615	M	.	.	.	.	.	.	i	1.438	0	i	3.516	0	i	6.353	0	-0.495	0	6.817	0	7.312	0	-0.969	0	3.404	0	2.5	0
letm1	LS	Lon	gene18045	M	.	X	X	X	.	D	gene4766	M	.	.	.	.	.	.	i	0.003	0	i	4.342	0	i	6.311	0	0.561	0	6.972	0	6.411	0	2.209	0	4.22	0	1.871	0
nfkbia	LS	Lon	gene628	M	.	X	X	.	U	.	gene9048	M	.	.	.	.	.	D	i	2.225	0	i	3.432	0	i	6.306	0	0.385	0	8.113	0	7.728	0	2.603	0	2.749	0	2.533	0
angptl4	LS	Lon	gene5598	M	X	.	X	.	.	.	gene10568	.	.	.	.	.	.	.	e	1.533	0	i	4.412	0	i	6.305	0	0.42	0	6.615	0	6.195	0	3.445	0	5.24	0	0	0
elf1	LS	Lon	gene20289	M	X	X	X	X	U	D	gene8608	M	.	.	.	X	.	.	i	1.225	0	i	3.781	0	i	6.302	0	0.375	0	7.584	0	7.209	0	3.113	0	2.952	0	0.898	0
snn	LS	Lon	gene17985	M	.	X	X	X	D	D	gene9144	M	.	.	.	X	.	D	i	2.395	0	i	8.397	0	i	6.261	0	1.492	0	7.506	0	6.014	0	3.832	0	8.438	0	4.342	0
cfap52	LS	Lon	gene13721	.	.	.	X	X	.	D	gene14243	.	.	.	.	X	.	.	e	0	0.809	i	1.912	0	i	6.256	0	0.118	0	5.307	0	5.189	0	4.749	0	0.306	0	-0.77	0
pi4k2b	LS	Lon	gene6606	M	.	X	X	.	U	D	gene4354	M	.	.	.	.	.	.	i	1.81	0	i	5.421	0	i	6.226	0	-0.622	0	6.328	0	6.951	0	0.53	0	5.279	0	4.186	0
far1	LS	Lon	gene640	M	.	X	X	.	.	D	gene19311	M	.	.	.	.	.	.	i	0	0	i	5.289	0	i	6.216	0	-0.302	0	5.174	0	5.476	0	1.329	0	4.371	0	2.79	0
tmem51	LS	Lon	gene7728	M	.	X	X	.	.	D	gene19609	M	.	.	.	.	.	.	i	2.81	0	i	2.791	0	i	6.179	0	-0.739	0	5.495	0	6.233	0	0.113	0	3.324	0	1.318	0
tecr	LS	Lon	gene8997	M	.	.	X	.	D	.	gene38380	M	.	.	.	.	.	.	i	2.128	0	i	1.767	0	i	6.178	0	2.317	0	6.934	0	4.617	0	-0.877	0	1.89	0	2.302	0
dcp1b	LS	Lon	gene1563	M	.	X	X	.	U	D	gene44610	M	.	.	.	.	.	.	e	0.143	0.095	i	3.727	0	i	6.169	0	-1.426	0	4.256	0	5.681	0	0.845	0	2.228	0	0.927	0
orai2	LS	Lon	gene2531	M	.	X	X	.	U	D	gene672	M	.	.	.	.	.	.	e	0.378	0.11	i	5.39	0	i	6.164	0	-1.558	0	5.175	0	6.734	0	0.908	0	4.789	0	3.042	0
apold1	LS	Lon	gene12793	.	.	.	X	.	D	.	gene38560	.	.	.	.	.	.	.	i	0	0	i	0	0	i	6.148	0	1.89	0	8.57	0	6.681	0	0	0	0	0	0	0
ephb4	LS	Lon	gene46065	.	.	X	X	X	.	.	gene15561	M	.	.	.	X	.	.	i	0.366	0	i	6.721	0	i	6.148	0	-1.03	0	6.449	0	7.479	0	1.203	0	5.062	0	4.748	0
bcl2l2	LS	Lon	gene10269	M	.	.	X	.	.	.	gene144	M	.	.	.	.	.	.	i	2.306	0	i	3.837	0	i	6.148	0	0.28	0	7.555	0	7.276	0	-0.72	0	3.33	0	3.863	0
slc22a23	LS	Lon	gene36106	M	.	X	X	.	U	D	gene15706	M	.	.	.	.	.	.	i	0.962	0	i	7.477	0	i	6.144	0	-1.698	0	6.803	0	8.501	0	0.273	0	7.577	0	5.675	0
zswim3	LS	Lon	gene10092	M	.	.	X	X	D	.	gene18301	M	.	.	.	.	.	.	e	0	0.649	e	0.257	0	i	6.105	0	0.136	0	6.924	0	6.788	0	-0.056	0.072	0.627	-0.836	0.398	-0.196
cwc25	LS	Lon	gene7616	M	.	.	X	X	.	D	gene19395	M	.	.	.	.	.	.	e	0.536	0.257	i	3.664	0	i	6.103	0	-0.694	0	5.933	0	6.628	0	2.922	0	4.703	0	1.09	0
cbl	LS	Lon	gene46605	M	.	X	X	X	U	D	gene7058	M	.	.	.	.	.	.	i	1.367	0	i	3.087	0	i	6.101	0	0.108	0	6.986	0	6.878	0	-0.131	0	3.18	0	2.603	0
tmem30a	LS	Lon	gene1906	M	.	X	X	X	.	.	gene50437	M	.	.	.	.	.	.	i	0.81	0	i	2.757	0	i	6.098	0	0.249	0	6.589	0	6.34	0	-0.397	0	2.197	0	1.087	0
foxo1	LS	Lon	gene35330	M	X	X	X	X	U	D	gene38377	M	.	.	.	.	.	.	e	0.819	0.455	i	5.868	0	i	6.09	0	-0.113	0	6.385	0	6.498	0	2.071	0	6.063	0	2.594	0
sgk1	LS	Both	gene19708	.	.	X	X	X	.	D	gene7919	M	.	X	X	X	U	D	i	2.226	0	i	8.29	4.676	i	10.481	4.457	-0.08	-1.547	10.869	4.831	10.949	6.377	-0.898	2.509	7.43	4.388	7.205	2.092
mrps21	LS	Lon	gene2908	M	.	X	X	.	.	.	gene9938	M	.	.	.	.	.	.	i	0.397	0	i	4.793	0	i	6.024	0	-1.122	0	4.692	0	5.814	0	-0.257	0	3.312	0	3.534	0
snrk	LS	Lon	gene1263	M	X	X	X	X	U	.	gene11495	M	.	.	.	.	.	.	i	1.419	0	i	2.15	0	i	5.995	0	-0.05	0	5.797	0	5.847	0	1.921	0	1.893	0	0.505	0
unc50	LS	Lon	gene19264	M	.	.	X	.	.	.	gene19310	M	.	.	.	X	.	.	i	0	0	i	1.366	0	i	5.988	0	-0.195	0	6.541	0	6.736	0	-0.776	0	1.896	0	3.779	0
tmem165	LS	Lon	gene7767	M	.	.	X	X	.	.	gene19461	M	.	.	.	.	.	.	e	0.056	0.002	i	3.368	0	i	5.984	0	0.457	0	6.816	0	6.359	0	3.103	0	2.9	0	1.67	0
rrbp1	LS	Lon	gene10543	M	X	X	X	.	D	D	gene19652	M	.	.	.	.	.	.	i	1.081	0	i	3.449	0	i	5.983	0	2.309	0	6.185	0	3.876	0	1.22	0	2.279	0	1.345	0
slc25a17	LS	Lon	gene7967	M	.	.	X	X	D	.	gene4374	M	.	.	.	.	D	.	i	1.225	0	i	1.104	0	i	5.976	0	1.944	0	6.393	0	4.449	0	0.281	0	0.891	0	-0.166	0
slain2	LS	Lon	gene8286	M	X	X	X	X	U	D	gene38821	M	.	.	.	.	.	.	e	0.731	0.669	i	4.816	0	i	5.975	0	-2.291	0	5.413	0	7.704	0	-0.285	0	3.87	0	3.147	0
stx19	LS	Both	gene19171	.	.	X	X	X	D	D	gene19540	.	X	X	X	X	D	D	i	0	3.252	e	5.065	1.645	e	10.857	4.884	4.816	2.439	10.486	4.91	5.67	2.471	5.979	3.854	5	1.261	-1.764	-2.114
tmem41b	LS	Lon	gene14384	M	.	.	X	.	D	.	gene14152	M	.	.	.	.	.	.	e	0	0.218	i	3.693	0	i	5.968	0	0.636	0	5.801	0	5.165	0	0.265	0	3.317	0	2.431	0
rpl26	LS	Lon	gene40346	M	.	.	X	.	.	U	gene16864	M	.	.	.	.	.	.	i	0.812	0	i	1.68	0	i	5.967	0	-0.036	0	6.976	0	7.012	0	-0.394	0	1.901	0	1.088	0
add3	LS	Lon	gene17634	M	.	X	X	X	U	D	gene15501	M	.	.	.	X	.	D	i	0	1.248	i	4.187	0.217	i	5.959	0	-0.672	-0.833	5.478	-0.201	6.15	0.632	0.945	0.725	3.656	0.829	2.918	0.567
map3k8	LS	Lon	gene17304	M	.	X	X	.	U	D	gene6009	M	.	.	.	.	.	.	i	0.222	0	i	5.161	0	i	5.959	0	-2.415	0	6.056	0	8.472	0	0.322	0	5.605	0	3.544	0
sulf1	LS	Lon	gene9347	M	.	X	X	X	U	D	gene47944	.	.	.	.	X	.	.	e	0.103	1.734	i	6	0	i	5.917	0	0.04	0	6.221	0	6.181	0	2.223	0	5.622	0	2.46	0
pitx2	LS	Both	gene41052	.	.	X	X	.	U	D	gene14181	.	.	X	X	X	U	.	e	0	3.811	e	6.861	7.853	i	5.911	0	-2.186	0	5.39	0	7.577	0	1.253	1.875	6.982	6.742	5.864	5.619
jag1	LS	Lon	gene11009	M	.	X	X	X	.	D	gene2149	M	.	.	.	.	.	.	i	1.447	0	i	5.704	0	i	5.88	0	0.736	0	4.826	0	4.09	0	4.14	0	5.673	0	1.381	0
fam199x	LS	Lon	gene9598	M	.	X	X	.	U	D	gene19915	M	.	.	.	.	.	.	i	0.389	0	i	4.406	0	i	5.875	0	-0.001	0	6.151	0	6.152	0	-0.074	0	3.637	0	3.681	0
amot	LS	Lon	gene18919	M	.	X	X	.	D	.	gene4402	M	.	.	.	.	.	.	e	0.417	0	i	1.894	0	i	5.867	0	1.772	0	6.707	0	4.935	0	1.769	0	1.231	0	0.645	0
sh3d19	LS	Lon	gene16641	M	.	X	X	X	U	D	gene37703	M	.	.	.	.	.	.	e	0	0.485	i	5.297	0	i	5.857	0	-0.64	0	6.283	0	6.924	0	3.018	0	5.181	0	2.416	0
eif3h	LS	Lon	gene12006	M	X	X	X	X	U	D	gene16972	M	.	.	.	.	.	.	i	1.906	0	i	3.865	0	i	5.855	0	-0.504	0	5.449	0	5.953	0	0.704	0	3.679	0	2.491	0
gli3	LS	Lon	gene14342	.	.	X	X	X	U	D	gene6341	M	.	.	.	X	.	.	i	0	0	e	7.279	0.606	e	5.839	0	-0.791	-2.066	7.071	-1.01	7.862	1.056	1.106	0.488	6.388	0.308	5.255	-2.1
rab5b	LS	Lon	gene9795	M	.	X	X	.	U	D	gene708	M	.	.	.	.	.	.	e	0.075	0	i	4.408	0	i	5.837	0	0.21	0	6.691	0	6.48	0	1.592	0	3.948	0	3.111	0
g2e3	LS	Lon	gene9426	M	.	.	X	X	D	.	gene1293	M	.	.	.	.	.	D	i	0.811	0	i	0.118	0	i	5.824	0	0.78	0	6.287	0	5.508	0	0.671	0	-0.137	0	0.639	0
lmo7	LS	Lon	gene17545	M	.	X	X	X	U	D	gene1101	M	.	.	.	.	.	.	i	0.746	0	i	5.699	0	i	5.815	0	-1.028	0	5.464	0	6.492	0	0.191	0	5.772	0	4.29	0
snx12	LS	Lon	gene49305	M	.	X	X	X	U	.	gene20428	M	.	.	.	.	.	.	i	0.812	0	i	3.633	0	i	5.796	0	-0.21	0	7.395	0	7.605	0	-0.899	0	2.641	0	3.181	0
gne	LS	Lon	gene17409	M	.	.	X	X	D	.	gene14531	M	.	.	.	X	.	D	i	0.81	0	i	2.603	0	i	5.796	0	0.675	0	7.112	0	6.437	0	0.889	0	2.435	0	1.676	0
cers5	LS	Lon	gene7178	M	.	X	X	.	U	D	gene17887	M	.	.	.	.	.	.	i	0	0	i	4.852	0	i	5.783	0	-2.021	0	4.003	0	6.024	0	0.375	0	3.621	0	2.143	0
edf1	LS	Lon	gene3239	M	.	.	X	X	.	.	gene1554	M	.	.	.	X	.	.	e	0	0.343	i	3.433	0	i	5.777	0	-0.891	0	4.454	0	5.344	0	0.897	0	3.494	0	2.13	0
prag1	LS	Lon	gene5883	M	.	.	X	X	D	.	gene4260	M	.	.	.	X	.	D	i	0	0	i	2.031	0	i	5.773	0	1.669	0	6.153	0	4.485	0	1.367	0	0.886	0	1.543	0
pdgfb	LS	Lon	gene41228	.	.	X	X	X	D	D	gene9771	M	.	.	.	.	.	.	e	0	0.263	i	4.493	0	i	5.706	0	1.647	0	6.914	0	5.267	0	5.164	0	4.001	0	-0.648	0
rbm42	LS	Lon	gene2245	M	.	.	X	X	U	.	gene45778	M	.	.	.	X	.	.	i	0	0	i	2.655	0	i	5.704	0	-1.208	0	4.546	0	5.754	0	-0.308	0	2.64	0	2.587	0
fgd4	LS	Lon	gene1642	M	.	X	X	X	D	D	gene14995	M	.	.	.	X	.	.	e	0.566	1.083	i	3.725	0	i	5.698	0	1.013	0	7.085	0	6.072	0	1.991	0	3.614	0	2.093	0
hey1	LS	Lon	gene50258	M	.	.	X	.	.	.	gene3367	M	.	.	.	.	.	.	e	0.559	0.969	i	3.853	1.813	i	6.788	1.092	0.257	0.309	6.283	0.744	6.027	0.435	3.053	1.178	0	1.457	0	-1.212
cert1	LS	Lon	gene14818	M	X	X	X	.	U	D	gene20247	M	.	.	.	.	.	.	i	1.641	0	i	4.906	0	i	5.695	0	-0.097	0	2.995	0	3.091	0	3.945	0	5.272	0	0.929	0
mfsd14bl	LS	Lon	gene6087	M	.	X	X	.	D	.	gene2986	M	.	.	.	.	.	.	e	0.197	0.037	i	3.254	0	i	5.69	0	1.73	0	5.637	0	3.907	0	0.276	0	1.986	0	0.619	0
smc1a	LS	Lon	gene18080	M	.	.	X	X	.	.	gene13231	M	.	.	.	X	.	.	i	1.006	0	i	1.34	0	i	5.669	0	0.175	0	7.225	0	7.05	0	-1.511	0	-1.126	0	3.781	0
slc25a5	LS	Lon	gene5449	M	.	X	X	X	U	D	gene8365	M	.	.	.	.	.	.	i	0.588	0	i	3.371	0	i	5.666	0	-0.182	0	5.717	0	5.899	0	1.444	0	2.549	0	2.191	0
nt5dc2	LS	Lon	gene12609	M	.	X	X	X	D	D	gene50954	M	.	.	.	.	.	.	e	0	0.104	i	3.702	0	i	5.657	0	1.336	0	3.799	0	2.463	0	3.026	0	2.499	0	-0.393	0
cgn	LS	Lon	gene14298	M	.	X	X	X	U	D	gene18844	M	.	.	.	.	.	.	i	1.131	0	i	3.835	0	i	5.648	0	-1.631	0	4.531	0	6.162	0	0.746	0	2.637	0	2.31	0
pkp2	LS	Lon	gene40261	M	X	X	X	X	U	D	gene46337	.	.	.	.	.	.	.	i	3.394	0	i	5.557	0	i	5.638	0	-0.488	0	5.378	0	5.866	0	2.219	0	5.418	0	3.09	0
pik3r1	LS	Lon	gene15977	M	X	X	X	X	U	D	gene700	M	.	.	.	X	.	.	i	1.351	0	i	3.908	0	i	5.608	0	-0.331	0	5.238	0	5.568	0	0.709	0	2.998	0	2.503	0
fgd1	LS	Lon	gene19771	M	.	X	X	X	D	D	gene5487	M	.	.	.	.	.	.	e	0	0.533	i	3.428	0	i	5.607	0	1.647	0	4.84	0	3.193	0	3.95	0	1.53	0	-1.393	0
cnksr1	LS	Lon	gene44874	M	.	.	X	.	U	.	gene12775	.	.	.	.	.	.	.	e	0.084	0	i	0	0	i	5.606	0	-0.725	0	7.218	0	7.943	0	-1.028	0	-0.684	0	1.009	0
cpne3	LS	Lon	gene12145	M	.	X	X	X	D	D	gene47951	M	.	.	.	.	.	.	i	1.81	0	i	5.622	0	i	5.586	0	2.305	0	6.826	0	4.521	0	1.69	0	4.758	0	2.868	0
sds	LS	Lon	gene16795	.	.	X	X	X	D	D	gene681	.	.	.	.	.	.	.	i	0	0	e	7.04	0	e	5.586	0	1.817	0	7.122	0	5.305	0	3.884	0	6.619	0	4.706	0
idh2	LS	Lon	gene4750	M	.	X	X	X	U	.	gene14004	M	.	.	.	.	.	D	e	0	2.089	i	3.781	0	i	5.569	0	-0.198	0	6.132	0	6.33	0	1.031	0	2.098	0	2.157	0
tacc1	LS	Lon	gene6014	M	.	X	X	X	U	D	gene12857	M	.	.	.	.	.	.	i	2.81	0	i	3.606	0	i	5.553	0	-4.37	0	3.496	0	7.866	0	-0.734	0	4.221	0	3.002	0
ptk2	LS	Lon	gene47996	M	X	X	X	X	U	D	gene35117	M	.	.	.	.	.	.	i	1.389	0	i	4.307	0	i	5.492	0	-0.715	0	4.368	0	5.084	0	1.291	0	4.035	0	2.502	0
dido1	LS	Both	gene9844	M	X	X	X	X	U	D	gene34366	M	X	.	X	X	U	.	i	1.855	1.178	i	4.759	0	i	7.326	1.841	-1.422	-2.51	6.444	0.489	7.866	2.998	-0.98	-0.761	4.15	-0.472	3.73	0.388
mib1	LS	Lon	gene3201	M	.	X	X	X	.	D	gene12236	M	.	.	.	X	.	.	i	0.936	0	i	4.557	0	i	5.483	0	0.298	0	5.655	0	5.357	0	0.727	0	4.601	0	3.407	0
pkdcc.1	LS	Lon	gene8501	.	.	X	X	X	.	D	gene50539	.	.	.	.	X	.	.	e	0	1.448	e	7.621	2.17	e	5.48	0	-1.349	-0.094	4.702	-0.822	6.051	-0.727	3.959	-0.389	7.147	1.585	3.848	0.498
src	LS	Lon	gene10821	M	.	X	X	X	.	D	gene7498	M	.	.	.	.	.	.	e	0.084	0.019	i	4.183	0	i	5.447	0	-0.342	0	4.579	0	4.921	0	0.389	0	2.584	0	1.692	0
asf1b	LS	Lon	gene12090	M	.	.	X	.	U	.	gene1624	.	.	.	.	.	.	.	i	0.489	0	i	1.136	0	i	5.436	0	-1.412	0	5.09	0	6.503	0	-0.519	0	0.087	0	0.996	0
epc1	LS	Lon	gene9893	M	X	X	X	X	U	D	gene48523	M	.	.	.	X	.	.	i	2.396	0	i	2.583	0	i	5.401	0	-1.044	0	5.654	0	6.698	0	-1.23	0	2.441	0	2.094	0
atp2a3	LS	Lon	gene37062	M	X	X	X	.	U	D	gene14732	M	.	.	.	.	.	.	i	2.263	0	i	4.172	0	i	5.4	0	-1.343	0	4.646	0	5.99	0	1.045	0	3.001	0	0.731	0
fam89a	LS	Lon	gene17294	M	X	.	X	.	U	.	gene1817	M	.	.	.	.	.	.	e	0.936	0	i	3.162	0	i	5.398	0	-1.287	0	6.607	0	7.894	0	1.915	0	0.314	0	2.092	0
atp6v0e1	LS	Lon	gene43498	M	.	X	X	X	U	D	gene34705	M	.	.	.	.	.	.	i	1.002	0	i	4.734	0	i	5.397	0	-1.397	0	6.274	0	7.671	0	1.561	0	4.838	0	4.177	0
utp23	LS	Lon	gene15304	M	.	.	X	X	.	.	gene18445	M	.	.	.	.	.	U	e	0.019	0.719	i	2.351	0	i	5.374	0	0.227	0	6.041	0	5.814	0	-2.85	0	2.907	0	1.963	0
pnp	LS	Lon	gene4821	.	X	.	X	X	D	.	gene15531	M	.	.	.	.	.	.	e	6.617	1.915	i	2.342	0	i	5.37	0	4.301	0	6.052	0	1.752	0	5.054	0	1.902	0	-0.77	0
grb2	LS	Lon	gene15289	M	.	.	X	.	.	.	gene1491	M	.	.	.	.	.	.	i	1.224	0	i	1.395	0	i	5.369	0	-0.201	0	5.857	0	6.058	0	0.311	0	0.964	0	1.036	0
sp7	LS	Lon	gene9306	.	.	X	X	X	U	D	gene9132	.	.	.	.	.	.	.	e	0.35	0	i	6.071	0	i	5.361	0	-0.684	0	5.488	0	6.172	0	1.781	0	6.398	0	4.142	0
ptpn14	LS	Lon	gene1901	M	.	X	X	X	U	D	gene8792	M	.	.	.	X	.	D	i	1.226	0	i	3.675	0	i	5.337	0	-1.701	0	5.355	0	7.057	0	0.592	0	2.642	0	3.452	0
spred1	LS	Lon	gene10953	.	X	X	X	X	U	D	gene42073	M	.	.	.	.	.	.	i	2.811	0	i	3.663	0	i	5.325	0	-1.257	0	5.855	0	7.112	0	5.915	0	3.265	0	-2.764	0
litaf	LS	Lon	gene9672	M	X	X	X	X	.	D	gene8713	M	.	.	.	X	.	.	i	2.135	0	i	4.375	0	i	5.317	0	-0.204	0	5.51	0	5.713	0	0.533	0	3.038	0	2.089	0
tut4	LS	Lon	gene17282	M	X	X	X	.	.	D	gene14515	M	.	.	.	.	.	.	i	1.28	0	i	1.018	0	i	5.305	0	0.248	0	6.195	0	5.947	0	-0.142	0	0.715	0	0.991	0
retreg2	LS	Lon	gene14159	M	.	X	X	.	.	.	gene48621	M	.	.	.	.	U	.	i	1.126	0	i	3.173	0	i	5.303	0	-0.025	0	4.181	0	4.206	0	-1.962	0	1.051	0	3.075	0
depdc1b	LS	Lon	gene13302	M	.	X	X	X	U	.	gene49539	M	.	.	.	.	.	U	e	0.331	1.436	i	2.735	0	i	5.302	0	-0.861	0	4.423	0	5.283	0	-1.396	0	2.475	0	1.091	0
chsy1	LS	Lon	gene919	M	X	X	X	X	U	D	gene1348	M	.	.	.	.	.	.	i	1.777	0	i	5.069	0	i	5.302	0	-0.974	0	3.699	0	4.672	0	1.746	0	5.101	0	2.166	0
plpp2	LS	Both	gene18607	M	.	X	X	X	D	D	gene9925	M	.	.	X	X	.	.	i	0	0.225	i	8.549	1.384	i	10.445	5.147	2.004	0.905	11.401	5.755	9.398	4.849	2.967	1.935	8.61	1.041	5.532	-0.495
rflb	LS	Lon	gene275	M	.	.	X	.	U	.	gene19581	.	.	.	.	.	.	.	i	0	0	i	2.687	0	i	5.295	0	-3.382	0	2.464	0	5.847	0	-0.943	0	0.334	0	-0.784	0
wasf2	LS	Lon	gene15805	M	.	X	X	X	U	.	gene9283	M	.	.	.	.	.	.	i	1.032	0	i	2.185	0	i	5.287	0	-0.749	0	4.768	0	5.518	0	-1.328	0	1.49	0	1.519	0
ugdh	LS	Lon	gene17660	M	.	X	X	.	U	D	gene6666	M	.	.	.	.	.	.	i	1.35	0	i	2.381	0	i	5.281	0	-0.917	0	5.225	0	6.142	0	-0.242	0	2.309	0	0.938	0
prkar2a	LS	Lon	gene2854	M	.	X	X	.	U	D	gene9269	M	.	.	.	.	.	.	i	0.221	0	i	4.007	0	i	5.28	0	0.001	0	6.585	0	6.584	0	0.27	0	3.568	0	3.006	0
pkn3	LS	Lon	gene41899	M	.	X	X	.	D	D	gene4414	M	.	.	.	.	.	.	i	0.389	0	i	5.356	0	i	5.271	0	1.68	0	5.71	0	4.03	0	1.49	0	4.568	0	3.871	0
get4	LS	Lon	gene37007	M	.	.	X	.	.	.	gene14429	M	.	.	.	.	.	.	i	0	0	i	2.368	0	i	5.253	0	-0.374	0	5.475	0	5.849	0	-0.202	0	0.322	0	1.89	0
rgcc	LS	Both	gene5439	M	X	X	X	.	D	D	gene5230	M	X	X	X	.	D	D	i	5.132	1.547	i	8.377	4.711	i	10.697	5.46	5.653	2.909	11.498	5.227	5.845	2.318	5.903	3.305	8.124	3.474	2.549	0.319
psma7	LS	Lon	gene11471	M	.	.	X	.	.	D	gene8834	M	.	.	.	.	.	.	i	0	0	i	0.788	0	i	5.231	0	0.503	0	5.878	0	5.375	0	-0.219	0	0.907	0	0.327	0
coq8a	LS	Lon	gene13441	M	.	X	X	X	U	D	gene10074	M	.	.	.	.	.	.	i	0.979	0	i	4.419	0	i	5.23	0	-2.202	0	3.564	0	5.766	0	-0.62	0	4.057	0	3.483	0
rnf38	LS	Lon	gene10742	M	X	X	X	X	U	D	gene13432	M	.	.	.	X	.	.	i	1.476	0	i	2.845	0	i	5.224	0	-2.654	0	3.063	0	5.717	0	-0.759	0	2.482	0	1.885	0
sim2	LS	Lon	gene13953	.	.	X	X	.	.	D	gene50801	.	.	.	.	.	.	.	e	0	7.339	i	9.521	0	i	5.213	0	-1.016	0	6.933	0	7.949	0	0.648	0	10.132	0	7.725	0
gjb2	LS	Lon	gene43064	M	.	.	X	X	.	.	gene9465	.	.	.	.	.	.	.	i	0	0	i	3.46	0	i	5.21	0	-1.96	0	2.582	0	4.542	0	3.07	0	1.359	0	-1.751	0
hes5.8	LS	Both	gene134	.	X	X	X	X	.	D	gene13524	.	.	X	X	.	U	D	e	5.574	0.368	e	9.512	4.122	e	9.598	4.405	-0.359	-1.52	10.805	4.827	11.165	6.346	1.002	0.702	9.066	4.398	8.365	3.172
rassf8	LS	Lon	gene10353	M	.	X	X	.	U	.	gene1077	M	.	.	.	.	.	.	i	3.253	0	i	4.733	0	i	5.176	0	-1.783	0	5.869	0	7.652	0	-0.62	0	4.126	0	2.897	0
entpd4	LS	Lon	gene6129	M	.	.	X	X	U	.	gene1373	M	.	.	.	.	.	.	i	1.033	0	e	0.227	0.073	i	5.175	0	-0.507	0	7.212	0	7.719	0	0.112	0.332	-0.007	-0.096	0.128	0.38
aff4	LS	Lon	gene5891	M	X	X	X	X	D	D	gene1058	M	.	.	.	.	.	.	i	0.891	0	i	3.542	0	i	5.155	0	0.615	0	5.705	0	5.09	0	-0.281	0	3.162	0	2.636	0
bspry	LS	Lon	gene11616	M	.	X	X	X	U	D	gene5865	M	.	.	.	.	.	.	i	0	0	i	5.073	0	i	5.14	0	-2.554	0	5.378	0	7.932	0	-1.09	0	6.064	0	5.104	0
lypla1	LS	Both	gene19669	M	.	X	X	.	U	.	gene2202	M	.	.	X	.	U	.	i	0	1.224	i	6.038	2.26	i	8.072	2.939	-0.21	-0.216	8.496	4.213	8.706	4.429	1.067	-0.544	4.553	1.187	4.534	1.826
twsg1	LS	Lon	gene19966	M	X	X	X	X	D	D	gene15133	M	.	.	.	.	.	.	i	2.547	0	i	3.611	0	i	5.13	0	1.635	0	6.469	0	4.834	0	2.887	0	4.695	0	1.37	0
otud7b	LS	Lon	gene17425	M	.	X	X	X	U	.	gene10845	M	.	.	.	.	.	.	e	0.275	0.559	i	2.556	0	i	5.126	0	-1.233	0	3.592	0	4.824	0	0.07	0	1.677	0	0.987	0
nfyc	LS	Lon	gene19851	M	.	X	X	X	.	.	gene15801	M	.	.	.	.	.	.	i	1.264	0	i	2.177	0	i	5.123	0	0.7	0	6.027	0	5.327	0	-0.802	0	1.725	0	1.497	0
hbegf	LS	Lon	gene14957	M	.	X	X	X	.	D	gene8378	M	.	.	.	.	.	.	i	1.073	0.484	i	4.847	0.334	i	6.584	1.472	0.583	0.272	7.223	2.764	6.64	2.492	1.254	-0.043	4.271	0.996	2.906	1.233
rab11fip1	LS	Lon	gene41836	M	.	X	X	X	U	D	gene43085	M	.	.	.	.	.	.	e	0.483	0.441	i	4.76	0	i	5.109	0	-0.934	0	4.287	0	5.222	0	0.697	0	4.957	0	2.131	0
ezh2	LS	Lon	gene17435	M	.	X	X	X	U	D	gene10638	M	.	.	.	.	.	.	e	0.07	0	i	2.875	0	i	5.104	0	-0.72	0	5.312	0	6.031	0	0.517	0	2.606	0	2.11	0
tiam1	LS	Lon	gene17652	M	X	X	X	X	U	D	gene8504	M	.	.	.	X	.	.	i	1.505	0	i	5.988	0	i	5.097	0	-0.977	0	4.942	0	5.918	0	1.753	0	5.177	0	3.791	0
rps5	LS	Lon	gene13640	M	.	.	X	X	U	.	gene4545	M	.	.	.	.	.	.	i	0.226	0	i	1.059	0	i	5.078	0	-0.199	0	5.466	0	5.665	0	-0.615	0	-0.002	0	0.574	0
elavl2	LS	Lon	gene19309	M	.	X	X	.	U	D	gene2726	M	.	.	.	.	.	.	e	0.52	0.799	i	3.458	0	i	5.077	0	-0.433	0	5.804	0	6.237	0	0.871	0	2.892	0	2.228	0
zfand5	LS	Both	gene2473	M	.	X	X	X	U	D	gene40536	M	X	X	X	X	U	D	i	0.961	1.437	i	7.584	2.403	i	7.414	2.34	-0.925	-1.136	7.699	2.64	8.625	3.776	0.179	-0.66	7.863	3	6.697	2.212
kit	LS	Lon	gene9615	.	X	X	X	X	.	D	gene18517	M	.	.	.	X	.	D	i	3.252	0	i	5.326	0	i	5.05	0	0.58	0	4.26	0	3.68	0	2.452	0	3.272	0	0.419	0
dnmbp	LS	Lon	gene7555	M	.	.	X	.	D	.	gene46026	M	.	.	.	.	.	.	i	1.81	0	i	1.188	0	i	5.049	0	2.673	0	4.086	0	1.414	0	1.898	0	0.963	0	0.238	0
dynlt2b	LS	Lon	gene17230	M	.	.	X	.	U	.	gene1888	.	.	.	.	.	.	.	e	0.484	3.382	i	2.659	0	i	5.039	0	-1.823	0	6.581	0	8.404	0	-1.72	0	2.896	0	2.416	0
rnf168	LS	Lon	gene2938	M	.	.	X	.	U	.	gene20113	M	.	.	.	.	.	.	i	0.308	0	i	1.619	0	i	5.035	0	-0.482	0	3.927	0	4.408	0	-1.658	0	1.046	0	2.085	0
pkp3	LS	Lon	gene12399	M	.	X	X	.	U	D	gene15795	.	.	.	.	X	U	.	i	1.393	0	i	3.219	0	i	5.034	0	-0.226	0	5.099	0	5.326	0	1.262	0	3.236	0	1.305	0
ccnk	LS	Lon	gene45449	M	.	X	X	X	U	.	gene3339	M	.	.	.	X	.	.	e	0.28	0.476	i	4.088	0	i	5.029	0	-0.109	0	5.538	0	5.647	0	0.057	0	3.318	0	2.753	0
ush1g	LS	Lon	gene42474	M	.	.	X	.	.	.	gene12983	M	.	.	.	X	.	.	i	2.55	0	i	2.196	0	i	5.027	0	-1.139	0	3.349	0	4.488	0	-0.833	0	0.321	0	1.534	0
sav1	LS	Lon	gene12290	M	.	X	X	.	U	D	gene10550	M	.	.	.	.	.	.	i	1.811	0	i	4.614	0	i	5.024	0	-0.402	0	4.839	0	5.241	0	2.096	0	4.774	0	2.087	0
cry2	LS	Lon	gene12930	M	.	X	X	X	.	D	gene12004	M	.	.	.	.	.	.	e	0	0.042	i	4.876	0	i	5.019	0	-0.716	0	4.458	0	5.174	0	2.999	0	3.306	0	1.679	0
gfi1	LS	Lon	gene917	.	.	X	X	.	.	D	gene35623	M	.	.	.	.	.	.	i	4.256	0	i	5.391	0	i	4.991	0	0.188	0	2.464	0	2.276	0	3.415	0	5.122	0	2.517	0
arpc5l	LS	Lon	gene12819	M	.	X	X	X	.	D	gene18420	.	.	.	.	.	.	.	i	1.64	0	i	3.574	0	i	4.954	0	0.155	0	5.441	0	5.286	0	1.989	0	3.005	0	1.452	0
arhgap27	LS	Lon	gene49533	M	X	.	X	.	D	.	gene36188	M	.	.	.	.	.	.	i	2.976	0	i	1.725	0	i	4.949	0	1.522	0	6.43	0	4.908	0	0.078	0	0.973	0	0.979	0
hes7.1	LS	Both	gene48729	.	X	X	X	.	D	D	gene17989	.	.	X	X	.	D	D	e	5.575	0	e	7.811	5.812	e	11.115	6.168	1.684	5.324	11.727	8.945	10.044	3.621	4.973	5.264	6.06	5.088	3.089	0
prcc	LS	Lon	gene16788	M	.	.	X	X	.	.	gene34574	M	.	.	.	.	.	D	e	0.131	1.159	i	1.838	0	i	4.937	0	0.285	0	5.12	0	4.836	0	1.04	0	1.894	0	0.666	0
tkt	LS	Lon	gene2303	M	.	X	X	.	D	D	gene6623	M	.	.	.	.	.	.	i	2.077	0	i	5.26	0	i	4.935	0	0.842	0	5.796	0	4.954	0	2.053	0	5.856	0	3.226	0
atp6v1d	LS	Lon	gene2591	M	.	X	X	.	U	.	gene5289	M	.	.	.	.	.	.	i	2.801	0	i	4.958	0	i	4.925	0	-1.707	0	5.105	0	6.811	0	0.828	0	2.488	0	3.179	0
prpf4b	LS	Lon	gene42233	M	.	.	X	X	U	.	gene39816	M	.	.	.	.	.	.	i	0.626	0	i	0.235	0	i	4.9	0	-0.545	0	5.193	0	5.738	0	-2.507	0	0.987	0	1.206	0
eya3	LS	Lon	gene14037	M	.	X	X	X	U	D	gene14095	M	.	.	.	.	.	.	i	0.81	0	i	3.033	0	i	4.891	0	-0.595	0	4.954	0	5.549	0	-1.211	0	2.657	0	2.214	0
calcoco1	LS	Lon	gene8342	M	.	.	X	.	.	.	gene44063	M	.	.	.	.	.	.	i	0	0	i	1.816	0	i	4.882	0	0.308	0	4.222	0	3.914	0	-1.127	0	1.887	0	1.071	0
cinp	LS	Lon	gene11186	M	.	.	X	.	.	.	gene45522	M	.	.	.	X	.	.	i	0.81	0	e	0.502	0.526	i	4.879	0	-0.538	0	5.7	0	6.238	0	-0.578	-0.012	0.837	0.565	0.869	1.613
cdkn2c	LS	Lon	gene15623	.	.	X	X	.	.	.	gene13124	M	.	.	.	.	.	.	e	1.938	2.075	i	6.597	0	i	4.877	0	0.788	0	5.05	0	4.262	0	2.383	0	5.691	0	3.563	0
npr1	LS	Lon	gene16327	.	.	X	X	.	U	D	gene436	.	.	.	.	X	.	.	e	0	0.363	i	5.854	0	i	4.848	0	-0.25	0	4	0	4.25	0	1.678	0	4.694	0	3.287	0
pias1	LS	Lon	gene321	M	.	.	X	.	.	.	gene11247	M	.	.	.	.	.	.	e	0.155	0.201	i	1.335	0	i	4.844	0	-0.009	0	5.226	0	5.235	0	-0.383	0	0.806	0	1.939	0
znf131	LS	Lon	gene14768	M	X	.	X	X	.	.	gene4195	M	.	.	.	.	.	.	i	0.81	0	i	1.211	0	i	4.814	0	0.158	0	5.124	0	4.966	0	1.092	0	2.246	0	0.084	0
pabir3	LS	Lon	gene4182	M	X	X	X	.	.	D	gene15634	M	.	.	.	.	.	.	i	1.746	0	i	1.615	0	i	4.811	0	0.314	0	5.215	0	4.901	0	-0.422	0	1.238	0	1.378	0
ptpn12	LS	Lon	gene40493	M	X	X	X	.	U	D	gene20049	M	.	.	.	.	.	.	i	1.472	0	i	4.202	0	i	4.79	0	-0.046	0	4.462	0	4.508	0	1.942	0	3.788	0	2.346	0
zc4h2	LS	Lon	gene15975	M	.	.	X	.	.	U	gene4190	M	.	.	.	X	.	.	e	0.469	0	i	1.932	0	i	4.786	0	0.934	0	5.381	0	4.447	0	0.496	0	1.31	0	0.192	0
bnip3	LS	Lon	gene39695	M	.	.	X	X	D	U	gene41345	M	.	.	.	X	.	.	e	0.465	0.363	e	0	0.028	i	4.784	0	0.878	0	3.986	0	3.108	0	-0.675	-0.266	0.026	-0.127	0.837	0.216
fam174b	LS	Both	gene4691	M	.	X	X	X	D	D	gene4435	M	.	.	X	X	.	.	i	0.003	0.809	i	3.985	0.958	i	7.08	2.301	4.988	0.114	8.114	4.469	3.126	4.355	6.217	-1.47	2.847	0.317	-1.8	1.478
tm9sf2	LS	Lon	gene12545	M	.	.	X	X	U	.	gene9838	M	.	.	.	.	.	.	i	1.657	0	i	1.201	0	i	4.769	0	0.053	0	6.08	0	6.027	0	-1.85	0	2.629	0	2.222	0
wdr82	LS	Lon	gene15333	M	.	.	X	X	.	.	gene16032	M	.	.	.	.	.	.	e	0.014	0.233	i	0.774	0	i	4.759	0	-0.219	0	6.22	0	6.439	0	0.111	0	-1.264	0	1.327	0
ankrd52	LS	Lon	gene2048	M	.	.	X	X	.	.	gene12078	M	.	.	.	.	.	.	i	0.472	0	i	0.473	0	i	4.752	0	0.434	0	4.518	0	4.084	0	-0.844	0	0.372	0	1.26	0
atp1b1	LS	Both	gene3713	M	X	X	X	X	D	D	gene5134	M	X	X	X	.	U	D	i	1.489	2.355	i	6.625	3.332	i	9.565	4.823	1.032	-0.553	8.909	4.885	7.877	5.438	3.654	1.475	5.571	2.882	1.637	1.415
rnf19a	LS	Lon	gene10849	M	X	X	X	X	.	D	gene15187	M	.	.	.	.	.	.	i	2.095	0	i	3.097	0	i	4.741	0	-0.253	0	4.737	0	4.99	0	0.722	0	2.517	0	1.527	0
cnot10	LS	Lon	gene14905	M	X	X	X	X	U	D	gene3645	M	.	.	.	.	.	.	i	1.468	0	i	1.821	0	i	4.735	0	-0.222	0	3.306	0	3.528	0	0.194	0	1.628	0	1.018	0
dio3	LS	unk	gene18391	.	.	X	X	.	.	.	gene38443	M	.	.	.	.	.	.	e	0	0.129	e	4.985	0.212	e	5.546	0.813	1.891	-0.2	4.683	0.528	2.793	0.728	3.506	1.395	4.023	0.723	1.067	0.35
znrf3	LS	Lon	gene15228	M	X	X	X	X	U	D	gene12369	M	.	.	.	X	.	D	i	2.488	0	i	2.73	0	i	4.706	0	-0.382	0	4.629	0	5.011	0	0.671	0	2.058	0	1.705	0
ca14	LS	Both	gene44775	.	.	X	X	X	D	D	gene40231	.	.	X	X	X	U	D	e	0.367	0	i	8.436	7.785	i	10.838	6.148	3.249	-2.265	11.968	6.276	8.72	8.542	2.201	2.164	8.005	7.684	6.282	5.241
bambi	LS	Both	gene45945	M	.	X	X	X	U	D	gene20288	M	.	X	X	X	.	D	i	1.225	1.224	i	9.006	3.616	i	10.007	5.326	-1.621	-0.569	10.377	4.531	11.998	5.1	1.799	2.038	8.796	2.86	6.698	0.856
wiz	LS	Lon	gene3721	M	X	X	X	X	U	U	gene40867	M	.	.	.	X	.	.	i	1.166	0	i	1.265	0	i	4.668	0	-2.116	0	3.491	0	5.607	0	-0.921	0	1.043	0	1.801	0
uri1	LS	Lon	gene3892	M	.	.	X	X	U	.	gene19792	M	.	.	.	.	.	D	i	1.421	0	i	1.51	0	i	4.658	0	-0.344	0	4.979	0	5.323	0	-1.173	0	1.234	0	1.508	0
tp53bp2	LS	Both	gene46728	M	.	X	X	.	.	D	gene39895	M	.	X	X	.	U	D	i	1.225	0.714	i	6.959	2.487	i	8.168	3.511	-0.024	-0.724	8.239	3.637	8.263	4.361	1.889	0.71	6.863	2.021	4.418	1.482
mki67	LS	Both	gene3530	M	X	X	X	X	U	D	gene13430	M	X	.	X	.	U	.	i	2.197	2.025	i	4.28	0	i	6.348	1.699	-0.501	-0.532	6.343	2.378	6.844	2.91	1.166	-0.388	4.258	-0.728	2.835	0.531
nckap5l	LS	Lon	gene2128	M	X	X	X	X	.	D	gene11548	M	.	.	.	.	.	.	i	1.222	0	i	4.316	0	i	4.634	0	0.165	0	4.088	0	3.923	0	2.887	0	3.802	0	1.267	0
slc39a1l	LS	Lon	gene36180	M	.	X	X	.	.	.	gene41519	M	.	.	.	.	.	.	i	1.45	0	i	4.064	0	i	4.631	0	-0.5	0	5.374	0	5.874	0	0.935	0	2.893	0	2.336	0
cox6b1	LS	Lon	gene6544	M	.	X	X	.	.	.	gene2454	M	.	.	.	.	.	.	i	0.489	0	i	2.262	0	i	4.628	0	-0.413	0	4.248	0	4.66	0	-0.154	0	1.631	0	1.664	0
clca3p	LS	Lon	gene7033	.	.	X	X	X	U	D	gene3491	.	.	.	.	.	.	.	i	0.367	0	i	6.85	0	i	4.627	0	-2.549	0	4.244	0	6.794	0	2.107	0	7.911	0	4.61	0
ahr	LS	Lon	gene42147	M	.	X	X	.	.	D	gene4850	M	.	.	.	.	.	.	i	0.467	0	i	1.902	0	i	4.62	0	0.167	0	5.477	0	5.31	0	1.212	0	0.736	0	0.898	0
snrpb2	LS	Both	gene3583	M	.	X	X	X	.	.	gene20344	M	.	.	X	X	.	.	i	1.225	1.483	i	4.425	0	i	7.364	2.754	-0.43	0.498	7.696	4.551	8.126	4.053	-0.984	-1.72	2.898	0.122	4.259	0.995
arl1	LS	Lon	gene10278	M	.	.	X	X	D	.	gene17191	M	.	.	.	.	.	.	e	0.016	0.533	i	1.784	0	i	4.609	0	1.51	0	5.706	0	4.197	0	0.189	0	-1.27	0	0.504	0
ppp2r5e	LS	Lon	gene15822	M	.	X	X	.	U	D	gene18982	M	.	.	.	.	.	.	i	0.857	0	i	3.027	0	i	4.609	0	-0.775	0	5.115	0	5.89	0	0.061	0	2.834	0	2.445	0
slc29a3	LS	Lon	gene5431	.	.	X	X	X	.	.	gene46849	M	.	.	.	.	.	.	e	0	0.2	i	3.873	0	i	4.607	0	-1.059	0	5.249	0	6.308	0	2.126	0	3.23	0	0.405	0
bpnt2	LS	Lon	gene3935	M	.	.	X	.	.	.	gene6084	M	.	.	.	.	.	.	e	0.126	0.049	i	2.663	0	i	4.596	0	-0.117	0	5.847	0	5.964	0	2.19	0	1.918	0	0.094	0
gad1.2	LS	Both	gene12018	M	.	X	X	X	D	D	gene13437	M	X	.	X	X	U	U	e	0	2.191	i	5.607	0.37	i	9.026	4.438	0.723	-1.424	10.28	7.096	9.557	8.52	0.112	-0.217	5.606	3.565	5.443	3.613
slc30a2	LS	Lon	gene14601	M	.	.	X	X	D	.	gene16845	M	.	.	.	.	.	.	i	0	0	i	0	0	i	4.586	0	4.252	0	5.806	0	1.554	0	-1.903	0	-1.011	0	-0.14	0
kif23	LS	Lon	gene12320	M	.	X	X	X	.	D	gene4050	M	.	.	.	.	.	.	i	0.588	0	i	2.835	0	i	4.583	0	0.288	0	5.078	0	4.79	0	0.898	0	3.108	0	1.611	0
gtf2b	LS	Both	gene431	M	.	X	X	.	U	D	gene2211	.	.	.	X	.	.	U	i	1.396	2.296	i	5.627	0.44	i	7.097	2.519	-0.102	-0.603	7.478	2.694	7.58	3.298	0.653	-3.057	5.103	-0.149	4.042	1.888
ndufa8	LS	Lon	gene8762	M	.	.	X	.	.	.	gene10110	M	.	.	.	.	.	.	i	0	0	e	0.549	0.298	i	4.576	0	-0.579	0	3.606	0	4.185	0	0.183	0.404	0.04	0.337	0.737	0.754
psma3	LS	Lon	gene18364	M	.	X	X	.	.	D	gene39069	M	.	.	.	.	.	.	i	0	0	i	2.273	0	i	4.567	0	-0.242	0	5.515	0	5.758	0	0.814	0	2.312	0	1.741	0
psmb7	LS	Lon	gene48208	M	.	.	X	X	.	.	gene2162	M	.	.	.	.	.	.	i	0	0	i	1.268	0	i	4.565	0	-0.051	0	4.841	0	4.891	0	-0.456	0	1.252	0	1.417	0
chmp2b	LS	Lon	gene18435	M	.	X	X	.	U	D	gene18180	M	.	.	.	.	.	.	i	0.349	0	i	3.033	0	i	4.561	0	-0.431	0	4.079	0	4.51	0	0.465	0	2.75	0	1.555	0
higd1a	LS	Lon	gene3202	M	.	.	X	X	.	U	gene5740	M	.	.	.	.	.	D	i	2.544	0	i	1.764	0	i	4.549	0	0.857	0	3.241	0	2.384	0	0.503	0	0.759	0	-1.372	0
plag1	LS	Lon	gene3860	M	X	X	X	X	.	D	gene2645	M	.	.	.	.	.	.	i	2.032	0	i	3.289	0	i	4.541	0	-0.036	0	5.057	0	5.093	0	0.602	0	2.254	0	2.087	0
cldn6.1	LS	Lon	gene15072	M	.	.	X	X	U	.	gene2223	M	.	.	.	.	.	.	i	0	0	i	3.722	0	i	4.541	0	-3.11	0	4.547	0	7.657	0	-0.979	0	3.12	0	3.675	0
sema3f	LS	Both	gene14928	.	.	X	X	X	D	D	gene1176	M	X	X	X	X	D	D	i	1.81	4.81	i	7.835	6.434	i	10.715	6.197	9.447	4.495	11.941	8.251	2.494	3.756	7.187	4.996	7.57	6.049	1.088	2.552
psmd6	LS	Lon	gene16142	M	.	.	X	.	.	.	gene37349	M	.	.	.	.	.	.	i	0.223	0	i	1.374	0	i	4.513	0	0.272	0	5.057	0	4.785	0	0.776	0	2.579	0	1.684	0
vps37b	LS	Lon	gene7885	M	.	.	X	.	U	.	gene9906	M	.	.	.	.	.	.	i	0.568	0	i	2.018	0	i	4.506	0	-1.115	0	4.377	0	5.492	0	-2.12	0	1.59	0	2.324	0
txnrd3	LS	Lon	gene14307	M	.	X	X	.	U	D	gene36903	M	.	.	.	.	.	.	i	0.158	1.085	i	3.351	0	i	5.228	0.74	0.019	-0.958	5.589	1.264	5.571	2.222	0.626	-0.303	3.007	-0.306	1.779	0.639
cep350	LS	Lon	gene18599	M	X	.	X	X	.	.	gene13449	M	.	.	.	.	.	.	i	1.205	0	i	0.707	0	i	4.471	0	0.394	0	4.109	0	3.714	0	-0.886	0	0.693	0	1.414	0
alas1	LS	Lon	gene18165	M	.	X	X	.	U	.	gene16075	M	.	.	.	.	.	.	i	1.49	0	i	2.744	0	i	4.456	0	-2.176	0	3.032	0	5.207	0	0.356	0	2.04	0	0.815	0
stim1	LS	Lon	gene42667	M	.	X	X	X	.	D	gene41944	M	.	.	.	.	.	.	i	1.81	0	i	3.295	0	i	4.451	0	0.19	0	4.89	0	4.7	0	1.241	0	2.752	0	1.361	0
tmem203	LS	Lon	gene13150	M	.	X	X	X	.	D	gene13644	M	.	.	.	.	.	.	i	4.255	1.808	i	5.213	0	i	6.718	2.277	0.32	-1.349	5.934	2.984	5.614	4.334	3.804	1.21	3.742	0.702	1.637	-0.525
rab11fip2	LS	Lon	gene14573	M	.	.	X	X	D	.	gene37788	.	.	.	.	.	.	.	i	2.133	0	i	0.76	0	i	4.432	0	4.211	0	5.81	0	1.599	0	0.331	0	2.762	0	1.124	0
acvr1b	LS	Both	gene16229	M	.	X	X	.	.	D	gene6744	M	X	.	X	X	.	.	i	0.352	1.577	i	6.311	1.986	i	8.403	3.984	-0.163	-0.378	8.234	4.91	8.398	5.288	0.594	-1.338	6.006	1.676	4.292	1.806
ryk	LS	Lon	gene37288	M	X	X	X	X	U	D	gene45936	M	.	.	.	.	.	.	i	1.175	0	i	2.005	0	i	4.396	0	-0.972	0	3.773	0	4.744	0	0.171	0	2.007	0	0.741	0
sod1	LS	Lon	gene391	M	.	.	X	.	U	.	gene16302	M	.	.	.	.	.	.	i	2.613	0	i	3.393	0	i	4.381	0	-2.53	0	3.048	0	5.577	0	-3.651	0	2.322	0	3.343	0
xylt1	LS	Lon	gene10242	M	.	X	X	X	D	D	gene17607	M	.	.	.	.	.	D	e	0	2.545	i	6.784	0	i	4.378	0	1.233	0	4.137	0	2.904	0	3.699	0	6.777	0	2.054	0
plcd1	LS	Lon	gene36995	M	.	X	X	.	U	.	gene40821	M	.	.	.	.	.	.	e	0.19	0.687	i	3.059	0	i	4.373	0	-2.585	0	3.265	0	5.85	0	1.005	0	1.922	0	1.364	0
eif1b	LS	Both	gene42419	M	.	X	X	X	U	D	gene37595	M	.	.	X	X	.	.	i	0.963	0.488	i	3.257	0	i	7.264	2.9	-0.898	-0.361	7.096	3.5	7.993	3.861	-1.567	-0.554	2.777	-0.126	2.675	-0.2
map3k1	LS	Lon	gene4777	M	X	X	X	X	U	D	gene15694	M	.	.	.	X	.	.	i	1.73	0	i	1.872	0	i	4.362	0	-1.265	0	4.119	0	5.384	0	0.415	0	1.635	0	1.032	0
nampt	LS	Lon	gene14246	M	X	X	X	.	D	D	gene17492	M	.	.	.	.	.	U	i	1.155	0	i	3.317	0	i	4.356	0	1.159	0	5.405	0	4.246	0	0.999	0	2.651	0	1.343	0
cyp2c8.1	LS	Lon	gene10000	M	X	.	X	.	.	.	gene48039	M	.	.	.	.	.	.	i	1.809	0	e	0.329	0.96	i	4.347	0	-1.458	0	3.409	0	4.867	0	-0.712	-1.002	1.524	-0.578	1.31	0.87
tbcel	LS	Lon	gene18899	M	X	.	X	X	D	.	gene17376	M	.	.	.	.	.	.	i	2.576	0	e	0.054	0.069	i	4.33	0	2.924	0	6.107	0	3.183	0	-0.226	-0.233	0.619	1.022	0.339	0.169
rela	LS	Lon	gene10161	M	.	X	X	X	U	D	gene15675	.	.	.	.	.	.	.	e	0.261	0	i	2.694	0	i	4.327	0	-0.571	0	4.77	0	5.341	0	0.016	0	2.753	0	1.671	0
avpi1	LS	Lon	gene7227	M	.	.	X	.	.	.	gene12799	M	.	.	.	.	.	.	i	3.253	0	i	1.899	0	i	4.321	0	-0.1	0	5.542	0	5.642	0	0.605	0	1.638	0	0.676	0
rxrb	LS	Lon	gene37854	M	X	.	X	X	.	.	gene46833	M	.	.	.	X	.	.	i	1.98	0	i	1.342	0	i	4.281	0	-0.17	0	4.322	0	4.491	0	-2.127	0	1.631	0	2.396	0
hal.2	LS	Lon	gene7479	M	.	X	X	.	D	D	gene4248	.	.	.	.	.	.	.	i	0	0	i	2.294	0	i	4.271	0	6.859	0	6.232	0	-0.628	0	5.158	0	0.088	0	-1.722	0
frmd6	LS	Lon	gene12630	M	.	X	X	.	D	D	gene11232	M	.	.	.	.	.	D	i	0.658	0	i	5.345	0	i	4.256	0	1.504	0	4.38	0	2.876	0	3.927	0	4.131	0	1.395	0
wapl	LS	Lon	gene16820	M	X	X	X	X	U	D	gene9124	M	.	.	.	.	.	.	i	0.982	0	i	1.563	0	i	4.253	0	-0.229	0	4.839	0	5.068	0	-0.042	0	2.051	0	1.016	0
mfap1	LS	Lon	gene11572	M	.	.	X	X	.	.	gene1372	M	.	.	.	.	.	.	i	1.55	0	i	0	0	i	4.246	0	0.274	0	4.88	0	4.606	0	-1.199	0	-0.851	0	1.321	0
cpsf3	LS	Lon	gene17058	M	.	.	X	X	.	.	gene18361	M	.	.	.	X	.	.	i	0	0	i	1.771	0	i	4.242	0	-0.217	0	4.974	0	5.191	0	0.243	0	1.536	0	2.032	0
tubb2b	LS	Lon	gene19181	.	.	X	X	X	U	D	gene10467	.	.	.	.	.	.	.	i	4.25	0	i	8.03	0	i	4.241	0	-0.967	0	5.916	0	6.882	0	1.211	0	8.146	0	6.06	0
mfsd14a	LS	Lon	gene13785	M	.	.	X	.	U	.	gene679	M	.	.	.	.	.	.	i	0.916	0	i	0.778	0	i	4.239	0	-0.379	0	4.79	0	5.169	0	-0.312	0	0.142	0	1.006	0
cramp1	LS	Lon	gene9016	M	.	X	X	X	U	.	gene14254	M	.	.	.	.	.	.	i	0.917	0	i	2.305	0	i	4.235	0	-0.69	0	5.245	0	5.935	0	0.492	0	1.898	0	2.348	0
c21orf91	LS	Lon	gene3361	M	X	X	X	X	.	.	gene8635	M	.	.	.	.	.	.	i	5.538	0	i	1.396	0	i	4.226	0	0.329	0	5.467	0	5.138	0	-2.26	0	3.853	0	4.026	0
cisd1	LS	Lon	gene12455	M	.	.	X	.	.	.	gene46481	M	.	.	.	.	.	.	i	3.393	0	i	1.626	0	i	4.213	0	-0.578	0	3.926	0	4.504	0	-0.389	0	0.743	0	-0.494	0
med15	LS	Lon	gene19589	M	.	.	X	X	U	.	gene12920	M	.	.	.	X	.	.	i	1.351	0	i	1.154	0	i	4.209	0	-1.486	0	3.356	0	4.842	0	-2.204	0	2.374	0	1.094	0
mcts1	LS	Lon	gene12597	M	.	.	X	.	.	.	gene14970	M	.	.	.	.	.	.	i	1.133	0	e	0.044	0.415	i	4.209	0	0.209	0	4.939	0	4.73	0	-0.533	-0.09	-0.233	0.286	0.356	0.447
pkp4	LS	Lon	gene46192	M	X	X	X	X	U	D	gene3578	M	.	.	.	.	.	.	i	1.31	0	i	5.346	0	i	4.208	0	0.281	0	4.276	0	3.995	0	2.814	0	5.826	0	1.781	0
kars1	LS	Lon	gene16879	M	.	X	X	.	U	D	gene46666	M	.	.	.	.	.	.	i	0.641	0	i	3.79	0	i	4.199	0	-0.881	0	5.536	0	6.418	0	2.209	0	3.769	0	2.21	0
slc8b1	LS	Lon	gene1954	M	X	X	X	.	D	D	gene36103	M	.	.	.	.	.	.	i	2.492	0	i	2.892	0	i	4.196	0	3.054	0	5.865	0	2.811	0	0.727	0	1.546	0	2.09	0
foxo4	LS	Lon	gene37132	M	.	.	X	X	.	U	gene38046	.	.	.	.	.	.	.	i	3.252	0	i	2.528	0	i	4.193	0	-0.319	0	4.978	0	5.296	0	-0.395	0	1.67	0	0.096	0
tfcp2l1	LS	Lon	gene6166	M	X	X	X	X	U	D	gene13512	M	.	.	.	.	.	.	i	1.636	0	i	4.66	0	i	4.192	0	-1.359	0	2.872	0	4.231	0	2.223	0	3.838	0	1.583	0
sbno1	LS	Lon	gene16170	M	X	X	X	X	D	D	gene36840	M	.	.	.	.	.	.	i	1.11	0	i	1.483	0	i	4.176	0	0.79	0	5.505	0	4.715	0	0.47	0	0.974	0	1.48	0
scube2	LS	Lon	gene47156	M	.	X	X	X	D	D	gene50024	.	.	.	.	X	U	D	i	3.252	0	i	3.551	0	i	4.17	0	1.484	0	4.653	0	3.169	0	2.026	0	3.125	0	0.654	0
rsrc2	LS	Lon	gene19195	M	.	.	X	X	U	.	gene3020	M	.	.	.	X	.	.	i	1.367	0	i	0.772	0	i	4.166	0	-0.055	0	5.619	0	5.674	0	-0.974	0	0.317	0	1.964	0
cenpv	LS	Lon	gene3219	.	.	.	X	X	D	.	gene5336	.	.	.	.	.	.	U	i	0.366	0	i	0.964	0	i	4.162	0	4.913	0	4.195	0	-0.718	0	-0.943	0	1.315	0	-0.805	0
anp32a	LS	Lon	gene16577	M	.	X	X	.	U	U	gene15898	M	.	.	.	.	.	.	i	1.675	0	i	2.62	0	i	4.16	0	-0.708	0	3.56	0	4.268	0	-0.132	0	2.485	0	1.412	0
ptpn1	LS	Lon	gene10496	M	.	.	X	.	U	.	gene10017	M	.	.	.	.	.	.	i	0.955	0	i	1.231	0	i	4.157	0	-0.551	0	3.28	0	3.831	0	0.677	0	1.531	0	0.225	0
ergic3	LS	Lon	gene18337	M	.	.	X	X	.	.	gene17228	M	.	.	.	.	.	.	i	0.113	0	i	1.018	0	i	4.152	0	0.377	0	5.731	0	5.354	0	-0.387	0	0.797	0	1.764	0
tardbp	LS	Lon	gene8097	M	.	.	X	X	.	.	gene10857	M	.	.	.	.	.	.	i	0.721	0	i	1.644	0	i	4.13	0	0.165	0	4.384	0	4.218	0	-1.854	0	1.438	0	1.221	0
gramd2b	LS	Lon	gene37025	M	X	X	X	X	U	D	gene43743	M	.	.	.	.	.	.	i	1.254	0	i	3.682	0	i	4.115	0	-1.42	0	4.756	0	6.175	0	-0.983	0	3.928	0	2.929	0
nodal6	LS	Both	gene44736	.	.	X	X	.	.	.	gene6251	.	.	X	X	.	.	.	e	4.252	4.253	e	7.792	5.814	e	10.129	6.019	-0.415	-0.271	10.14	6.725	10.556	6.996	-0.722	-0.019	7.372	5.277	6.66	4.616
tpp2	LS	Lon	gene12188	M	.	.	X	X	.	.	gene8624	M	.	.	.	.	.	.	i	0.99	0	i	1.174	0	i	4.106	0	0.537	0	5.389	0	4.853	0	-0.369	0	0.988	0	2.067	0
srsf11	LS	Lon	gene43474	M	.	.	X	X	U	.	gene12705	M	.	.	.	X	.	.	e	0.135	1.118	i	1.346	0	i	4.099	0	-0.266	0	4.373	0	4.64	0	0.286	0	1.711	0	0.946	0
ppp2r5c	LS	Lon	gene2411	M	.	X	X	X	U	.	gene4020	M	.	.	.	.	.	.	i	0.692	0	i	1.579	0	i	4.09	0	-0.311	0	4.286	0	4.597	0	0.047	0	1.24	0	0.925	0
eif5a	LS	unk	gene15803	M	.	X	X	.	U	D	gene15621	M	.	.	.	.	.	.	i	0.71	1.619	i	4.299	0.938	i	7.408	3.318	-0.713	-0.623	7.868	3.316	8.581	3.939	1.432	0.055	3.512	0.293	2.675	1.743
jmjd6	LS	Lon	gene466	M	X	X	X	X	.	.	gene16417	M	.	.	.	X	.	.	i	1.003	0.395	i	6.975	0.112	i	6.246	2.164	-0.944	-1.238	5.888	1.387	6.831	2.625	0.554	-0.759	5.573	0.569	5.159	1.202
pou5f3.1	LS	Both	gene7197	.	.	.	X	X	U	.	gene6701	.	.	.	X	X	.	.	i	3.253	3.253	e	0	1.942	i	8.235	4.155	-0.644	-0.407	8.862	5.918	9.506	6.325	0.459	-0.202	-1.69	4.218	-0.125	2.893
vegfa	LS	Lon	gene41477	M	X	X	X	.	U	D	gene41105	M	.	.	.	.	.	.	i	2.392	0	i	3.656	0	i	4.074	0	-0.902	0	3.106	0	4.008	0	2.564	0	3.786	0	0.869	0
znrf1	LS	Lon	gene10453	M	X	X	X	.	U	D	gene9437	M	.	.	.	.	.	.	i	2.092	0	i	1.54	0	i	4.072	0	-0.627	0	3.068	0	3.695	0	-0.193	0	1.041	0	1.357	0
snta1	LS	Lon	gene49828	M	X	.	X	X	U	.	gene1465	.	.	.	.	.	.	.	e	1.174	0	i	1.077	0	i	4.061	0	-2.159	0	4.816	0	6.976	0	-0.623	0	0.894	0	0.314	0
rcl1	LS	Lon	gene6656	M	.	X	X	X	U	.	gene16525	M	.	.	.	.	D	.	i	0.81	0	i	1.689	0	i	4.042	0	-0.709	0	4.531	0	5.241	0	-0.215	0	0.704	0	1.301	0
fdx1	LS	Lon	gene12682	M	.	.	X	.	.	.	gene17575	M	.	.	.	.	.	.	i	1.81	0	i	0.382	0	i	4.039	0	0.276	0	3.479	0	3.202	0	-2.372	0	0.917	0	2.074	0
cdc25c	LS	Lon	gene665	M	.	.	X	X	U	.	gene8506	M	.	.	.	.	.	.	e	0.2	0	i	0.142	0	i	4.02	0	-0.86	0	1.904	0	2.763	0	0.906	0	0.407	0	0.279	0
ttk	LS	Lon	gene36096	M	.	.	X	X	.	.	gene19328	M	.	.	.	.	.	.	i	0.127	0	e	0	0.063	i	3.992	0	-0.131	0	3.98	0	4.11	0	-0.317	-0.561	0.072	0.38	0.096	0.274
pttg1ip.1	LS	Lon	gene41722	M	.	X	X	X	.	D	gene8995	M	.	.	.	.	.	.	i	1.64	0	i	2.528	0	i	3.99	0	-0.361	0	3.601	0	3.962	0	2.047	0	3.01	0	0.364	0
per3	LS	Lon	gene11447	M	.	X	X	.	U	D	gene16755	M	.	.	.	.	.	.	i	0.31	0	i	4.614	0	i	3.987	0	0.012	0	4.402	0	4.39	0	1.774	0	3.933	0	2.713	0
ngly1	LS	Lon	gene9050	M	.	.	X	.	U	.	gene14466	M	.	.	.	.	.	D	i	1.359	0	i	1.131	0	i	3.981	0	-0.726	0	3.563	0	4.289	0	0.083	0	1.094	0	2.04	0
casc3	LS	Lon	gene19258	M	.	X	X	X	.	D	gene13162	M	.	.	.	X	.	.	i	1.658	0	i	2.592	0	i	3.98	0	-0.422	0	4.269	0	4.69	0	-0.435	0	2.021	0	1.536	0
virma	LS	Lon	gene4608	M	.	.	X	.	.	.	gene9884	M	.	.	.	X	.	.	i	0.806	0	i	0.616	0	i	3.97	0	-0.352	0	4.65	0	5.002	0	-1.027	0	0.23	0	0.963	0
hes4	LS	Lon	gene19742	M	X	X	X	X	.	D	gene36932	M	.	.	.	X	.	D	i	3.252	0	i	5.109	0	i	3.945	0	-1.474	0	2.064	0	3.539	0	1.588	0	4.087	0	3.005	0
raf1	LS	Lon	gene11431	M	.	X	X	X	U	.	gene43142	M	.	.	.	X	.	.	i	2.194	0	i	2.62	0	i	3.942	0	-1.366	0	3.828	0	5.195	0	-0.953	0	2.722	0	2.855	0
sbk1l	LS	Both	gene8495	.	X	X	X	.	D	D	gene13190	.	X	X	X	.	.	.	i	6.574	3.252	i	9.221	4.119	i	13.711	9.776	0.936	0.106	14.212	10.825	13.276	10.719	0.702	-1.394	8.146	2.757	7.62	3.531
paxip1	LS	Lon	gene1966	M	.	X	X	.	.	D	gene3891	M	.	.	.	.	.	.	i	0.732	0	i	2.504	0	i	3.932	0	0.238	0	4.049	0	3.812	0	1.257	0	2.276	0	0.829	0
sptan1	LS	Lon	gene37401	M	.	.	X	X	.	.	gene38774	M	.	.	.	.	.	.	i	1.363	0	i	1.069	0	i	3.924	0	-0.143	0	3.903	0	4.045	0	1.535	0	1.439	0	0.632	0
mier3	LS	Lon	gene40187	M	.	X	X	X	.	.	gene43838	M	.	.	.	.	.	.	i	0.953	0	i	1.365	0	i	3.922	0	0.104	0	4.125	0	4.021	0	0.066	0	1.058	0	1.172	0
pfkfb4	LS	Lon	gene11464	M	.	X	X	X	U	D	gene10391	M	.	.	.	.	.	.	i	0.487	0	i	4.047	0	i	3.912	0	-0.824	0	3.406	0	4.229	0	1.396	0	3.821	0	2.202	0
nmrk2	LS	Lon	gene19545	M	.	X	X	.	.	D	gene1539	M	.	.	.	X	.	.	e	0.315	1.061	i	4.563	0	i	3.912	0	-0.328	0	4.837	0	5.166	0	1.152	0	4.673	0	2.574	0
cdc6	LS	Both	gene9532	M	X	X	X	.	U	D	gene8757	M	X	.	X	.	.	.	i	1.675	2.338	i	4.274	1.432	i	5.828	1.916	-0.601	-0.551	5.909	1.871	6.51	2.422	0.211	-0.151	3.672	0.789	3.112	0.971
bap1	LS	Lon	gene6209	M	.	.	X	X	.	.	gene18118	M	.	.	.	X	.	.	i	1.226	0	i	0	0	i	3.896	0	0.44	0	3.819	0	3.379	0	0.283	0	-1.006	0	0.092	0
hs6st1	LS	Lon	gene15213	M	X	X	X	X	U	D	gene35694	M	.	.	.	X	.	.	i	1.788	0	i	2.354	0	i	3.891	0	-0.539	0	3.234	0	3.773	0	1.375	0	1.776	0	0.677	0
nusap1	LS	Lon	gene16847	M	.	X	X	X	.	D	gene44300	M	.	.	.	.	.	.	i	0.809	0	i	3.641	0	i	3.884	0	-0.544	0	3.639	0	4.183	0	2.858	0	2.824	0	-0.177	0
numa1	LS	Lon	gene10672	M	X	X	X	.	U	.	gene6852	M	.	.	.	.	.	.	i	1.99	0	i	1.969	0	i	3.874	0	-1.927	0	3.193	0	5.12	0	-0.111	0	0.919	0	1.339	0
ppp6r1	LS	Lon	gene4445	M	.	X	X	.	U	D	gene4648	M	.	.	.	.	.	.	i	0.405	0	i	2.897	0	i	3.863	0	-0.49	0	4.13	0	4.621	0	-0.192	0	1.908	0	2.421	0
sec63	LS	Lon	gene47915	M	X	.	X	X	.	.	gene14893	M	.	.	.	.	.	.	i	1.517	0	i	0.854	0	i	3.861	0	-0.128	0	4.884	0	5.011	0	-0.466	0	1.126	0	0.747	0
radx	LS	Lon	gene7467	M	X	.	X	X	U	.	gene17203	M	.	.	.	.	.	.	i	1.771	0	i	1.466	0	i	3.85	0	0.097	0	3.072	0	2.974	0	-0.053	0	1.192	0	1.667	0
dusp7	LS	Lon	gene15704	M	X	.	X	.	U	.	gene40335	.	.	.	.	.	.	.	i	3.395	0	i	2.103	0	i	3.831	0	-3.259	0	4.194	0	7.453	0	0.591	0	0.319	0	1.513	0
slain2l	LS	Lon	gene13234	M	.	X	X	.	.	.	gene11051	M	.	.	.	.	.	.	i	0.846	0	i	1.75	0	i	3.828	0	0.416	0	4.858	0	4.442	0	0.725	0	0.564	0	0.798	0
banf1	LS	Lon	gene18792	M	.	.	X	X	.	.	gene8953	M	.	.	.	.	.	.	i	0.49	0	e	0.043	0.305	i	3.826	0	-0.352	0	3.647	0	4	0	-0.201	0.371	-0.155	-0.263	0.255	0.423
tmod3	LS	Lon	gene48158	M	.	X	X	.	U	D	gene2233	M	.	.	.	X	.	.	e	0	0.315	i	2.606	0	i	3.826	0	-0.865	0	4.577	0	5.442	0	1.362	0	2.572	0	0.972	0
gata5	LS	Lon	gene41331	M	.	X	X	X	U	D	gene14389	.	.	.	.	X	.	.	e	0	0.938	i	3.673	0	i	3.818	0	-1.463	0	2.191	0	3.654	0	2.673	0	3.37	0	-0.615	0
fgf8	LS	Both	gene937	.	.	X	X	X	.	D	gene37277	.	X	X	X	X	D	D	i	3.253	4.838	e	9.285	5.543	e	11.149	7.335	0.247	1.203	10.795	6.821	10.549	5.618	2.515	3.94	8.856	5.379	5.705	1.444
ccdc47	LS	Lon	gene11489	M	.	.	X	X	U	.	gene7442	M	.	.	.	X	.	.	i	0	1.074	i	0	0.711	i	5.754	1.955	-1.907	-1.163	4.487	1.388	6.394	2.551	1.179	0.825	1.316	0.893	0.508	0.346
esyt3	LS	Lon	gene6643	M	.	X	X	.	U	.	gene1231	M	.	.	.	.	.	D	i	1.352	0	i	1.643	0	i	3.798	0	-0.464	0	3.251	0	3.715	0	0.597	0	1.311	0	-0.444	0
srp54	LS	Lon	gene7373	M	.	.	X	X	U	.	gene15527	M	.	.	.	.	.	.	i	0.513	0	i	0	0	i	3.796	0	-0.101	0	5.183	0	5.283	0	-0.635	0	-0.169	0	0.982	0
mafb	LS	unk	gene11121	.	.	X	X	.	.	.	gene1130	M	.	.	.	.	.	.	e	1.807	2.073	e	2.861	0.19	e	5.115	1.327	-0.672	-0.121	2.31	1.255	2.982	1.376	2.779	-0.249	2.171	0.199	-1.51	1.4
rps27	LS	Lon	gene44274	M	.	.	X	X	U	.	gene43620	M	.	.	.	X	.	U	i	0.221	3.395	i	0.692	1.008	i	5.801	2.025	-0.374	-0.26	5.174	2.644	5.549	2.904	-1.645	0.164	1.318	0.324	2.344	0.294
pten	LS	Lon	gene13475	M	X	X	X	X	U	D	gene7579	M	.	.	.	.	.	.	i	0.878	0	i	1.425	0	i	3.77	0	-1.005	0	3.207	0	4.212	0	-0.149	0	1.343	0	0.556	0
ddx4	LS	Lon	gene16823	M	.	X	X	.	U	.	gene36694	M	.	.	.	.	.	.	i	0.697	0	i	2.245	0	i	3.768	0	-0.586	0	4.16	0	4.746	0	-0.109	0	1.174	0	1.652	0
gmppb	LS	Lon	gene1352	M	.	.	X	X	.	.	gene975	M	.	.	.	.	.	.	i	0	0	i	0.374	0	i	3.747	0	-0.558	0	4.238	0	4.796	0	-0.898	0	1.49	0	2.414	0
cct8	LS	Lon	gene4994	M	.	.	X	X	U	.	gene5601	M	.	.	.	.	.	U	i	1.076	0	i	1.501	0	i	3.744	0	-0.393	0	4.478	0	4.871	0	1.041	0	0.796	0	1.571	0
crk	LS	Both	gene5881	M	.	X	X	X	U	.	gene50332	M	.	.	X	X	U	.	e	0.259	0.206	i	5.437	1.189	i	8.559	4.825	-0.23	-0.305	9.086	5.366	9.316	5.671	-0.11	-0.024	4.768	1.145	4.265	1.003
egr4	LS	Lon	gene47116	.	X	X	X	.	U	.	gene42181	.	.	.	.	.	.	.	e	4.132	0	e	4.139	0	e	3.732	0	-0.672	0	4.307	0	4.978	0	-0.393	0	2.2	0	3.512	0
fam174a	LS	Lon	gene13723	M	.	X	X	.	D	.	gene44624	M	.	.	.	.	.	.	i	0.485	0	e	0.591	0.939	i	3.72	0	-1.194	0	4.153	0	5.347	0	0.414	0.314	0.203	0.117	0.437	0.976
septin7	LS	Lon	gene17873	M	.	X	X	X	U	D	gene13695	M	.	.	.	X	.	.	e	0.095	0	i	2.126	0	i	3.717	0	-0.309	0	3.501	0	3.811	0	0.851	0	2.254	0	0.606	0
avpr1a	LS	unk	gene17677	.	.	.	.	.	.	.	gene687	.	X	.	X	.	.	D	e	1.808	4.368	e	4.972	1.531	e	7.161	3.45	1.054	-0.563	7.442	3.382	6.388	3.944	3.053	2.291	3.756	2.628	2.534	0.102
wdr46	LS	Lon	gene18532	M	.	.	X	X	.	.	gene15146	M	.	.	.	.	.	.	i	0	0	i	1.176	0	i	3.698	0	-0.267	0	4.016	0	4.283	0	-0.613	0	1.147	0	0.564	0
rpl23a	LS	unk	gene49073	M	.	.	X	X	D	.	gene237	M	.	.	.	X	.	.	i	1.224	1.077	i	1.35	0.454	i	6.007	2.309	-0.032	-0.124	5.646	2.723	5.678	2.847	0.852	-0.908	1.845	-0.21	0.742	0.49
rgs19	LS	Lon	gene44762	M	.	.	X	X	.	D	gene35033	M	.	.	.	.	.	.	i	1.485	0	e	0.444	0.085	i	3.683	0	-0.499	0	4.226	0	4.724	0	0.745	0.907	1.285	-0.122	0.666	-0.265
rnf24	LS	Both	gene9327	M	.	X	X	X	U	D	gene576	M	.	X	X	X	.	D	i	0.347	1.392	i	6.203	5.444	i	7.415	3.732	-2.382	0.474	2.645	5.13	5.026	4.656	1.318	1.219	5.531	5.204	3.769	3.915
klhl18	LS	Lon	gene10215	M	.	.	X	.	U	.	gene43243	M	.	.	.	.	.	D	i	1.345	0	i	1.127	0	i	3.678	0	-0.006	0	2.014	0	2.02	0	1.584	0	0.765	0	-0.208	0
tmem185a	LS	Lon	gene839	M	.	.	X	X	.	.	gene4590	M	.	.	.	.	.	.	i	0.224	0	e	0.199	0.153	i	3.675	0	0.279	0	4.199	0	3.921	0	-0.63	0.101	-0.003	-0.026	0.456	-0.138
flii	LS	Lon	gene11897	M	.	.	X	.	U	.	gene9236	M	.	.	.	.	.	.	i	0.55	0	i	1.178	0	i	3.67	0	-1.807	0	2.906	0	4.713	0	1.149	0	1.939	0	0.465	0
rpl8	LS	Lon	gene13824	M	.	.	X	X	.	.	gene5182	M	.	.	.	.	.	.	i	0.918	0	i	0.321	0	i	3.666	0	0.143	0	5.178	0	5.035	0	-0.134	0	1.312	0	0.816	0
fam13a	LS	Lon	gene11980	M	X	X	X	X	.	D	gene38024	M	.	.	.	.	.	.	i	1.666	0	i	1.762	0	i	3.661	0	-0.302	0	4.663	0	4.965	0	0.038	0	1.505	0	1.377	0
lats2	LS	Lon	gene43283	M	X	X	X	X	U	D	gene9102	M	.	.	.	.	.	.	i	2.174	0	i	2.516	0	i	3.653	0	-0.639	0	3.889	0	4.527	0	0.573	0	2.071	0	1.322	0
oga	LS	Lon	gene20405	M	X	X	X	X	U	.	gene18656	M	.	.	.	.	.	.	i	1.272	0	i	1.661	0	i	3.627	0	-0.837	0	4.448	0	5.285	0	-0.306	0	1.683	0	2.153	0
rps6	LS	Lon	gene15112	M	.	.	X	X	.	.	gene5352	M	.	.	.	.	.	.	i	1.486	0	i	1.359	0	i	3.62	0	-0.217	0	3.814	0	4.03	0	1.071	0	1.207	0	1.081	0
dnajc5g	LS	Lon	gene47232	M	.	.	X	X	U	.	gene42774	M	.	.	.	.	.	.	i	0	0.226	i	0.843	0	i	3.618	0	-1.419	-1.056	3.456	-2.382	4.875	-1.326	-0.137	0.567	-0.003	-0.062	0.089	-2.03
sbno2	LS	Lon	gene4833	M	.	.	X	X	U	.	gene3950	M	.	.	.	.	.	.	i	0.877	0	i	1.119	0	i	3.616	0	0.091	0	4.183	0	4.092	0	0.514	0	-0.104	0	0.262	0
phf20	LS	Lon	gene3097	M	.	.	X	.	.	.	gene13816	M	.	.	.	.	.	.	i	0.952	0	i	1.038	0	i	3.588	0	0.497	0	2.889	0	2.393	0	0.371	0	0.204	0	0.333	0
ifrd1	LS	Lon	gene7931	M	X	X	X	X	U	U	gene17953	M	.	.	.	X	U	D	i	1.629	0.059	i	4.524	2.256	i	4.652	1.067	0.013	-0.627	4.881	2.441	4.868	3.068	0.598	0.704	3.067	1.753	2.668	0.923
znf250	LS	Lon	gene42524	M	.	.	X	X	.	.	gene36834	M	.	.	.	.	.	.	i	1.811	0	i	1.765	0	i	3.583	0	-0.793	0	3.498	0	4.291	0	0.594	0	-1	0	0.585	0
atpaf2	LS	Lon	gene20369	M	.	.	X	.	U	.	gene11929	M	.	.	.	.	.	.	i	2.388	0	i	1.659	0	i	3.574	0	-0.556	0	3.152	0	3.708	0	1.353	0	0.981	0	-0.657	0
klf6	LS	Lon	gene7548	M	.	.	X	X	U	.	gene1862	M	.	.	.	.	.	.	i	1.816	0	i	1.759	0	i	3.571	0	-0.882	0	3.196	0	4.078	0	1.067	0	-0.708	0	0.5	0
taf3	LS	Lon	gene8821	M	.	.	X	X	U	.	gene47844	M	.	.	.	.	.	.	i	0.466	0	i	0.486	0	i	3.569	0	-0.631	0	3.496	0	4.127	0	-0.287	0	0.439	0	0.152	0
klf11	LS	Both	gene10736	M	.	X	X	X	U	D	gene14840	M	.	X	X	.	.	D	i	0.813	0	i	5.812	3.521	i	6.093	2.528	-0.665	-0.583	5.386	3.656	6.051	4.24	1.313	1.58	5.444	3.293	4.303	1.971
jup	LS	Lon	gene3074	M	.	X	X	X	U	D	gene11420	M	.	.	.	.	.	.	i	0.845	0	i	2.873	0	i	3.565	0	-0.655	0	4.399	0	5.054	0	1.222	0	2.661	0	1.327	0
incenp	LS	Lon	gene47108	M	.	X	X	.	U	.	gene10899	M	.	.	.	X	.	.	i	1.057	2.548	i	2.116	0	i	4.683	1.121	-0.272	-0.063	4.128	1.291	4.401	1.354	-1.204	0.129	1.415	-0.841	1.9	-0.3
tmem50a	LS	Lon	gene11019	M	.	.	X	X	U	.	gene2564	M	.	.	.	.	D	.	e	0	0.207	i	0.549	0	i	3.546	0	-0.292	0	4.002	0	4.294	0	-2.716	0	0.159	0	1.087	0
clptm1	LS	Lon	gene39588	M	.	X	X	X	U	.	gene38956	M	.	.	.	.	.	.	i	0.917	0	i	2.026	0	i	3.546	0	-1.384	0	4.208	0	5.592	0	0.26	0	1.023	0	1.499	0
slc4a11	LS	Lon	gene50172	M	X	X	X	X	U	D	gene1289	M	.	.	.	.	.	.	i	1.648	0	i	1.607	0	i	3.541	0	-0.888	0	3.644	0	4.532	0	0.211	0	2.045	0	1.818	0
zdhhc8	LS	Lon	gene13546	M	X	X	X	X	U	D	gene10200	M	.	.	.	.	.	.	i	1.274	0	i	2.063	0	i	3.541	0	0.512	0	4.663	0	4.152	0	0.218	0	2.357	0	1.135	0
cldn6.2	LS	Lon	gene16552	M	.	.	X	X	U	.	gene16082	M	.	.	.	.	.	.	e	0	0.031	i	1.41	0	i	3.541	0	-1.498	0	3.417	0	4.915	0	0.582	0	0.327	0	0.428	0
odc1	LS	Both	gene14836	M	.	X	X	X	.	D	gene8416	M	.	X	X	X	U	.	i	0	1.145	i	4.704	0.903	i	5.157	1.628	-0.206	-0.519	6.146	2.651	6.352	3.17	1.286	0.348	4.082	0.32	2.474	1.11
rnf115	LS	Lon	gene1403	M	.	.	X	X	U	.	gene2027	M	.	.	.	.	.	.	i	1.135	0	i	1.39	0	i	3.519	0	-1.677	0	2.435	0	4.112	0	-0.313	0	1.16	0	1.01	0
cdc40	LS	Both	gene8989	M	.	.	X	X	U	.	gene6161	M	X	.	X	X	U	.	i	0	1.997	i	1.126	0.034	i	4.745	1.227	-0.202	-0.508	5.434	0.773	5.636	1.28	-0.979	2.372	1.084	-3.732	1.814	-2.615
fbl	LS	Both	gene42550	M	.	X	X	X	.	.	gene49680	M	X	.	X	X	.	.	i	1.488	3.031	i	3.383	0.596	i	6.943	3.427	-0.076	-0.974	7.767	2.88	7.843	3.854	0.432	2.089	4.181	-1.152	3.846	-1.056
plk4	LS	Lon	gene7300	M	.	.	X	X	.	.	gene18998	M	.	.	.	.	.	.	e	0.164	0.167	i	1.467	0	i	3.515	0	-0.589	0	4.766	0	5.355	0	-1.785	0	-0.269	0	1.894	0
pax3	LS	Lon	gene49808	.	.	X	X	X	U	D	gene46864	.	.	.	.	X	U	D	e	2.809	0	i	11.549	9.144	i	4.549	1.035	-1.246	-2.63	6.336	1.689	7.582	4.318	1.125	1.271	11.686	9.371	9.832	7.51
psmd1	LS	Lon	gene50123	M	X	X	X	X	U	D	gene15748	M	.	.	.	.	.	.	i	1.618	0	i	4.482	0	i	3.506	0	-0.73	0	3.659	0	4.389	0	0.676	0	4.233	0	3.032	0
rhog2	LS	Lon	gene10073	M	.	.	X	.	.	D	gene3280	M	.	.	.	X	.	.	i	0.367	0.658	i	2.51	0	i	4.667	1.167	0.768	-0.239	5.321	1.907	4.552	2.146	-0.128	1.562	1.644	0.033	0.409	-0.783
gusb	LS	Lon	gene12538	M	.	.	X	.	U	.	gene12170	.	.	.	.	.	.	.	i	0.922	0	i	0.531	0	i	3.499	0	-0.981	0	4.789	0	5.77	0	0.28	0	0.775	0	-0.591	0
ncaph	LS	Lon	gene48863	M	.	.	X	X	.	.	gene18475	M	.	.	.	.	.	.	i	1.612	0	i	0	0	i	3.497	0	-0.326	0	4.371	0	4.697	0	-0.64	0	0.767	0	0.879	0
rcc1	LS	Lon	gene11160	M	.	.	X	X	U	.	gene15684	M	.	.	.	.	.	.	i	0.586	0	i	0.44	0	i	3.489	0	0.182	0	4.038	0	3.857	0	0.222	0	0.781	0	0.251	0
med25	LS	Lon	gene1759	M	.	.	X	X	U	.	gene879	M	.	.	.	.	.	.	i	1.033	0	e	0	0.024	i	3.484	0	-0.6	0	3.48	0	4.081	0	0.177	0.331	-0.401	-0.3	-0.137	-0.032
arfgap2	LS	Lon	gene12025	M	X	.	X	.	.	.	gene5540	M	.	.	.	.	.	.	i	1.63	0	i	1.309	0	i	3.476	0	0.083	0	3.955	0	3.872	0	-0.114	0	0.776	0	0.912	0
hnrnpc	LS	Both	gene11090	M	X	X	X	.	D	D	gene17251	M	.	.	X	X	D	.	i	1.71	0.11	i	2.155	0.153	i	7.42	3.947	2.54	1.171	7.734	5.1	5.194	3.929	1.001	-0.514	1.763	-0.45	0.877	0.914
parp2	LS	unk	gene20034	.	.	.	.	.	.	.	gene46683	M	.	.	X	.	.	.	i	0	0.337	e	2.922	0	e	3.472	0	1.421	-0.118	3.171	-0.289	1.75	-0.171	0.019	0.114	5.155	-0.541	1.675	-0.364
rab35l	LS	Lon	gene14286	M	.	.	X	X	.	.	gene42584	M	.	.	.	.	.	.	i	0.531	0	i	0.983	0	i	3.464	0	-0.269	0	4.366	0	4.635	0	1.359	0	0.448	0	0.333	0
ptgfrn	LS	unk	gene38868	.	.	.	.	.	U	D	gene40551	M	.	.	X	X	.	.	i	0	0	i	6.971	1.24	i	6.46	3.002	-2.219	-0.863	5.621	2.01	7.84	2.873	1.733	0.53	6.291	-0.485	3.854	-0.01
igf1r	LS	Lon	gene45707	M	X	X	X	X	.	D	gene17458	M	.	.	.	.	.	.	i	1.431	0	i	1.825	0	i	3.451	0	-0.36	0	3.639	0	3.998	0	0.276	0	1.705	0	1.139	0
nid2	LS	Lon	gene910	M	.	X	X	X	.	.	gene4572	M	.	.	.	X	.	.	i	1.055	0	i	1.41	0	i	3.448	0	0.089	0	3.176	0	3.087	0	0.504	0	1.092	0	0.812	0
cldn7	LS	unk	gene18237	M	X	X	X	.	U	D	gene39685	M	.	.	.	.	.	.	i	2.296	3.401	i	6.061	0	i	7.549	4.104	-1.214	-1.268	7.1	2.729	8.314	3.997	-0.08	1.485	5.314	0.745	5.379	-1.384
thoc2	LS	Lon	gene17205	M	X	X	X	X	U	D	gene10781	M	.	.	.	.	.	.	i	1.776	0	i	2.134	0	i	3.443	0	0.281	0	4.362	0	4.082	0	1.049	0	2.172	0	0.958	0
phf3	LS	Lon	gene10724	M	.	.	X	.	.	.	gene9744	M	.	.	.	.	.	.	i	0.767	0	i	0.573	0	i	3.422	0	0.582	0	4.086	0	3.504	0	-0.432	0	0.244	0	1.275	0
dcaf13	LS	Lon	gene7893	M	X	.	X	X	.	.	gene5442	M	.	.	.	.	.	.	i	1.588	0	i	0.491	0	i	3.422	0	0.019	0	3.825	0	3.806	0	-0.865	0	-0.197	0	1.562	0
ak2	LS	Lon	gene7943	M	.	.	X	.	.	.	gene5291	M	.	.	.	.	.	.	i	1.071	0	i	1.518	0	i	3.41	0	-0.918	0	3.986	0	4.904	0	1.003	0	1.138	0	1.795	0
strn3	LS	Lon	gene35874	M	.	X	X	X	D	D	gene4988	M	.	.	.	X	.	.	i	1.072	0	i	2.418	0	i	3.407	0	0.602	0	3.351	0	2.749	0	0.24	0	2.089	0	0.953	0
cdc25a	LS	Lon	gene2090	M	X	X	X	.	U	D	gene45701	M	.	.	.	.	.	D	i	2.327	1.809	i	2.104	1.036	i	3.922	0.527	-1.11	1.553	3.819	-2.084	4.929	-3.637	0.262	1.458	1.921	0.305	1.098	-4.686
terf2	LS	Lon	gene9215	M	.	.	X	.	.	.	gene41131	M	.	.	.	.	.	.	e	0.021	0.215	i	0	0	i	3.392	0	0.103	0	4.654	0	4.551	0	-0.532	0	0.397	0	0.377	0
supt4h1	LS	Lon	gene19677	M	.	.	X	.	.	.	gene19630	M	.	.	.	.	.	.	i	0	0	i	1.406	0	i	3.391	0	-1.039	0	3.132	0	4.17	0	-2.18	0	0.304	0	1.289	0
tvp23b	LS	Lon	gene18439	M	.	.	X	X	.	.	gene42112	M	.	.	.	.	.	.	i	0.81	0	i	0	0	i	3.39	0	-0.472	0	4.026	0	4.498	0	-0.042	0	0.319	0	2.093	0
usp25	LS	Lon	gene36662	M	X	X	X	X	U	D	gene42912	M	.	.	.	X	.	.	i	1.198	0	i	2.479	0	i	3.39	0	-0.765	0	3.481	0	4.246	0	1.021	0	2.444	0	1.355	0
slc25a44	LS	Lon	gene619	M	.	X	X	.	.	.	gene3107	M	.	.	.	.	.	.	e	0.388	0.072	i	2.857	0	i	3.382	0	0.227	0	2.18	0	1.953	0	2.511	0	2.497	0	-1.805	0
traf3ip1	LS	Lon	gene17144	M	.	.	X	X	D	.	gene2844	M	.	.	.	.	.	.	e	0	0.722	e	0.156	0	i	3.381	0	1.884	0	4.577	0	2.693	0	-0.078	0.15	0.055	-0.612	0.406	-0.202
nsun7	LS	Lon	gene15190	M	X	X	X	.	U	.	gene16504	M	.	.	.	.	.	.	i	2.808	0	i	2.434	0	i	3.375	0	-1.948	0	3.378	0	5.327	0	2.182	0	0.787	0	-0.241	0
eif3e	LS	Lon	gene35995	M	.	.	X	X	.	.	gene9739	M	.	.	.	.	.	.	i	0.417	0	i	1.247	0	i	3.369	0	-0.173	0	3.898	0	4.071	0	0.356	0	0.724	0	0.146	0
mcm5	LS	Lon	gene19282	M	X	.	X	.	.	U	gene5676	M	.	.	.	.	.	D	i	1.991	0	e	0.112	0.668	i	3.366	0	-0.029	0	4.637	0	4.666	0	-0.546	1.986	-0.219	0.581	0.302	-2.074
tifa	LS	Lon	gene20044	M	.	.	X	.	.	.	gene34403	M	.	.	.	X	D	D	i	0.812	0	i	0.796	0	i	3.362	0	0.224	0	3.476	0	3.252	0	-0.943	0	-3.472	0	-2.149	0
thoc5	LS	Lon	gene7534	M	.	.	X	X	U	.	gene5699	M	.	.	.	.	.	.	i	0.61	0	i	1.185	0	i	3.355	0	-0.048	0	5.052	0	5.099	0	-1.166	0	1	0	1.862	0
scarb2	LS	Lon	gene2031	M	.	X	X	.	U	D	gene9042	M	.	.	.	.	.	.	i	1.81	0	i	4.993	0	i	3.355	0	-2.805	0	3.955	0	6.76	0	-0.6	0	5.312	0	3.748	0
sec61g	LS	Both	gene10842	M	.	.	X	X	.	.	gene18737	M	X	.	X	X	.	.	i	1.395	2.633	i	2.634	1.59	i	6.964	3.612	0.307	-0.262	7.956	4.418	7.649	4.68	0.768	0.17	3.648	0.98	2.258	2.008
sall3	LS	unk	gene2448	.	.	X	X	X	.	D	gene7975	.	.	.	.	X	.	D	e	0.367	4.253	i	9.006	8.551	i	8.255	4.909	0.602	0.466	8.863	5.232	8.261	4.765	0.423	0.773	8.539	8.843	7.386	6.493
polr1d.1	LS	Lon	gene7234	M	.	.	X	X	.	.	gene36633	M	.	.	.	.	.	.	i	0.223	0	i	0	0	i	3.345	0	-0.012	0	4.761	0	4.773	0	-2.206	0	-1.673	0	0.913	0
nr1i2	LS	unk	gene20534	M	.	X	X	X	U	D	gene6404	M	.	.	.	.	.	D	i	0	1.807	i	4.273	5.372	i	5.887	2.545	-1.36	-0.848	5.098	1.586	6.459	2.434	2.335	2.237	3.736	4.966	1.673	3.129
ehd1	LS	Both	gene9122	M	.	X	X	X	.	D	gene16215	M	.	.	X	.	.	.	e	0.196	0.51	i	5.142	0.677	i	7.543	4.208	0.314	-0.146	7.989	4.769	7.675	4.916	2.129	-0.397	4.965	0.539	2.018	1.079
traf4	LS	Both	gene852	M	X	X	X	.	U	D	gene17398	M	.	X	X	X	U	D	i	1.673	1.81	i	7.082	5.1	i	10.227	6.897	0.258	-1.092	8.54	5.921	8.282	7.013	2.03	1.084	7.252	5.466	4.815	3.523
prrc2c	LS	Lon	gene16099	M	X	X	X	X	.	D	gene19433	M	.	.	.	X	.	.	i	1.349	0	i	2.001	0	i	3.327	0	0.33	0	4.813	0	4.483	0	0.237	0	2.019	0	1.684	0
cdc34	LS	Both	gene2936	M	.	X	X	X	.	U	gene1244	M	X	X	X	X	.	.	i	0	2.523	i	1.787	0.344	i	5.404	2.078	-0.301	-0.729	5.506	2.534	5.807	3.264	-1.639	-0.336	1.904	-0.299	2.974	-0.078
pank1	LS	Lon	gene10784	M	.	X	X	X	U	D	gene14156	M	.	.	.	.	.	.	i	0	0	i	3.571	0	i	3.319	0	-1.691	0	4.244	0	5.934	0	1.052	0	3.306	0	2.311	0
aldoa	LS	Lon	gene16277	M	.	X	X	.	U	.	gene43317	M	.	.	.	.	.	.	i	1.405	3.293	i	3.105	0.177	i	4.357	1.044	-1.82	-0.854	1.047	-0.319	2.867	0.534	0.697	2.158	1.43	-0.625	1.237	-0.975
rnf222	LS	Both	gene36458	M	.	X	X	X	D	D	gene6226	M	.	.	X	X	.	.	i	0.367	3.253	i	6.108	3.419	i	9.926	6.617	2.092	0.176	10.21	7.658	8.118	7.482	3.344	2.492	6.149	3.755	3.116	1.637
ppp1r3c.2	LS	Lon	gene8442	M	.	X	X	X	U	D	gene7326	M	.	.	.	.	.	.	i	1.227	0	i	3.403	0	i	3.303	0	-1.738	0	2.423	0	4.16	0	1.883	0	3.555	0	0.678	0
prickle1	LS	Both	gene35061	M	.	X	X	.	D	D	gene12046	M	X	X	X	X	U	D	i	0	1.641	i	3.996	1.923	i	8.699	5.398	1.188	-0.31	8.651	5.097	7.462	5.408	1.331	-0.263	4.986	2.491	3.002	1.557
bend3	LS	Lon	gene10630	M	.	.	X	X	.	D	gene12931	M	.	.	.	X	.	.	i	0.81	0	i	1.934	0	i	3.289	0	0.159	0	4.445	0	4.286	0	1.603	0	1.31	0	-0.482	0
adrb2	LS	Lon	gene7389	.	.	X	X	X	U	D	gene8791	M	.	.	.	.	.	.	e	1.674	0.606	e	2.257	0.862	e	4.081	0.794	0.136	-0.102	2.065	0.215	1.929	0.317	2.511	0.042	0.76	0.769	-1.877	0.214
kdm2b	LS	Lon	gene5038	M	.	X	X	X	.	D	gene42900	M	.	.	.	.	.	.	i	0.295	0	i	4.388	0	i	3.286	0	0.114	0	3.297	0	3.183	0	1.57	0	3.522	0	1.825	0
tspan3	LS	Lon	gene14093	M	.	.	X	X	U	.	gene4647	M	.	.	.	.	.	.	i	0.963	0	i	1.582	0	i	3.283	0	-2.334	0	3.237	0	5.571	0	-0.209	0	1.503	0	1.089	0
sp5l	LS	Both	gene1042	.	X	X	X	X	D	D	gene4776	.	.	X	X	X	.	D	i	4.837	0	e	8.23	6.345	e	12.323	9.043	0.81	0.468	12.867	9.253	12.057	8.785	0.747	1.717	7.843	6.155	6.744	3.9
psme3	LS	Both	gene15152	M	.	X	X	.	U	.	gene6131	M	.	.	X	.	.	.	e	0.01	0.169	i	2.418	0.247	i	5.428	2.16	-0.508	-0.232	5.713	2.284	6.221	2.516	-0.978	-0.512	2.702	-0.32	1.993	0.922
sowahc	LS	Both	gene37886	.	.	X	X	X	.	D	gene19248	.	.	X	X	X	.	D	e	0.351	0.488	e	5.15	1.898	e	5.077	1.816	0.048	0.08	4.619	2.153	4.571	2.073	2.259	0.826	5.017	2.258	2.427	0.999
prpf31	LS	Lon	gene10362	M	X	.	X	X	.	.	gene7088	M	.	.	.	.	.	.	i	1.127	0	i	0	0	i	3.257	0	0.113	0	4.269	0	4.156	0	-1.387	0	-1.38	0	0.721	0
bnip3l	LS	Lon	gene13268	M	.	.	X	X	.	.	gene36491	M	.	.	.	.	.	U	i	1.811	0	i	0.745	0	i	3.249	0	0.289	0	4.429	0	4.141	0	0.59	0	1.635	0	0.834	0
fcf1	LS	Lon	gene2961	M	.	.	X	.	U	.	gene1572	M	.	.	.	.	.	.	i	0.86	0	i	0.511	0	i	3.248	0	-0.61	0	3.969	0	4.579	0	-0.734	0	1.759	0	2.274	0
dact1	LS	Both	gene13956	M	X	X	X	.	.	D	gene17138	M	.	X	X	.	.	.	i	2.133	1.073	i	8.352	3.902	i	8.615	5.367	0.088	0.192	8.815	5.124	8.726	4.932	2.009	1.78	7.836	2.185	6.111	1.318
tbkbp1	LS	Lon	gene34993	.	.	X	X	.	.	D	gene47396	M	.	.	.	.	.	D	i	1.815	0	i	3.957	0	i	3.237	0	-0.253	0	3.288	0	3.541	0	1.861	0	3.393	0	1.93	0
rer1	LS	Lon	gene43076	M	.	X	X	.	.	.	gene12768	M	.	.	.	X	.	.	i	1.132	4.395	i	3.325	0	i	3.503	0.272	0.966	0.411	4.946	0.518	3.981	0.107	-0.943	-0.912	3.48	0.116	2.383	-0.33
slc27a4	LS	Lon	gene12694	M	.	X	X	X	.	D	gene11327	M	.	.	.	.	.	.	e	0.387	0	i	3.095	0	i	3.215	0	0.082	0	3.98	0	3.898	0	-0.127	0	2.597	0	1.186	0
plekha4	LS	Both	gene18708	M	X	X	X	X	D	D	gene967	M	.	X	X	.	U	D	i	2.811	0.399	i	3.868	1.855	i	6.577	3.37	1.686	-0.939	6.652	1.751	4.966	2.691	1.983	0.48	3.252	2.146	1.613	0.694
rogdi	LS	Lon	gene7655	M	.	X	X	.	U	.	gene15904	M	.	.	.	.	.	.	i	1.33	0	i	1.823	0	i	3.202	0	-1.084	0	1.783	0	2.867	0	0.373	0	1.934	0	1.094	0
asb7	LS	Lon	gene7626	M	.	.	X	X	U	.	gene7915	M	.	.	.	X	.	.	e	0	0.386	i	0.771	0	i	3.199	0	-1.232	0	3.647	0	4.879	0	-0.722	0	0.948	0	1.414	0
ubxn2a	LS	Lon	gene49632	M	.	X	X	.	.	D	gene9992	M	.	.	.	.	.	.	i	0.448	0	i	1.708	0	i	3.197	0	0.144	0	2.271	0	2.127	0	-0.161	0	1.008	0	0.469	0
ankrd50	LS	Lon	gene2000	M	X	.	X	X	U	.	gene1567	M	.	.	.	.	.	.	i	1.444	0	i	0.331	0	i	3.193	0	-0.442	0	2.639	0	3.081	0	0.206	0	0.114	0	0.694	0
rnf145	LS	Lon	gene4861	M	.	.	X	X	U	.	gene11922	M	.	.	.	.	.	.	i	1.166	0	e	0.011	0.005	i	3.179	0	-1.17	0	3.244	0	4.414	0	0.243	0.303	-0.247	0.026	-0.211	-0.071
usp22	LS	Lon	gene50462	M	X	.	X	.	.	.	gene12901	M	.	.	.	.	.	.	i	1.672	0	i	0.246	0	i	3.178	0	-0.561	0	3.101	0	3.662	0	-0.361	0	0.109	0	0.597	0
aldh1a2	LS	Both	gene1923	M	X	X	X	X	.	.	gene1983	M	X	X	X	X	D	D	i	2.489	1.892	i	3.905	2.76	i	7.79	4.624	0.483	1.962	7.962	5.859	7.479	3.896	0.69	0.528	2.685	1.87	1.848	0.676
ap1s1	LS	Lon	gene12845	M	.	.	X	.	U	.	gene16204	M	.	.	.	X	.	.	i	1.808	0	i	1.236	0	i	3.162	0	-0.65	0	2.85	0	3.5	0	1.253	0	0.463	0	-0.159	0
psmd11	LS	Both	gene10881	M	.	.	X	X	U	.	gene20004	M	.	.	X	X	.	.	i	0.224	0.739	i	1.553	0	i	5.808	2.648	-1.375	-0.734	4.588	2.465	5.962	3.199	-1.201	-1.122	2.318	0.843	0.903	0.494
fpgs	LS	Lon	gene8159	M	.	X	X	.	.	.	gene17564	M	.	.	.	.	.	.	i	1.613	0	i	2.794	0	i	3.157	0	-0.367	0	3.317	0	3.684	0	0.209	0	1.944	0	2.886	0
cdkn2aip	LS	Both	gene5543	M	.	.	X	.	.	D	gene19778	M	.	.	X	.	.	.	i	0.81	1.957	i	2.483	0	i	6.045	2.891	0.254	-0.394	6.692	3.956	6.438	4.35	0.702	0.299	3.531	-0.011	2.204	0.762
dnajc7	LS	Lon	gene7224	M	.	.	X	.	.	.	gene2801	M	.	.	.	X	.	.	i	1.067	0	i	0	0	i	3.152	0	0.845	0	3.67	0	2.825	0	0.527	0	-0.386	0	0.471	0
n4bp1	LS	Lon	gene11179	M	.	.	X	X	U	.	gene12938	M	.	.	.	.	.	.	i	0.441	0	i	0	0	i	3.147	0	-0.982	0	3.581	0	4.564	0	1.074	0	0.672	0	1.008	0
rplp2	LS	Lon	gene6846	M	.	.	X	X	.	.	gene10567	M	.	.	.	.	.	.	i	0	0	i	0.329	0	i	3.139	0	-0.149	0	4.273	0	4.422	0	-0.393	0	-0.7	0	-0.34	0
slc20a1	LS	Lon	gene6751	M	.	X	X	X	U	D	gene5921	M	.	.	.	.	.	.	i	0.936	0	i	1.41	0	i	3.131	0	-0.411	0	3.172	0	3.583	0	0.353	0	2.035	0	1.257	0
cdk12	LS	Lon	gene39966	M	X	.	X	X	.	.	gene18286	M	.	.	.	.	.	.	i	1.355	0	i	0.767	0	i	3.114	0	-0.133	0	3.034	0	3.167	0	0.178	0	0.636	0	0.521	0
suv39h2	LS	Both	gene3927	M	.	X	X	.	D	D	gene42610	M	.	.	X	X	D	.	i	0.226	1.64	i	3.151	0.667	i	5.725	2.617	1.172	1.089	6.256	4.167	5.083	3.078	0.966	-1.397	2.467	-0.362	1.728	-0.91
hpgd	LS	Both	gene20450	.	X	X	X	X	.	D	gene42289	.	.	X	X	X	U	D	i	2.81	0	i	8.683	6.12	i	10.769	7.665	-0.013	-2.476	11.613	9.01	11.626	11.485	0.561	-1.401	8.921	6.275	7.185	6.343
pkmyt1	LS	Lon	gene15936	M	.	.	X	.	.	.	gene18895	M	.	.	.	.	.	.	i	1.568	0	i	1.059	0	i	3.104	0	0.395	0	2.872	0	2.476	0	-0.69	0	0.636	0	0.822	0
nudt4	LS	Both	gene12501	M	.	X	X	.	U	D	gene19831	M	X	X	X	X	U	.	i	1.225	2.526	i	6.454	2.03	i	7.487	4.39	0.003	-0.876	7.137	3.784	7.134	4.66	2.473	-0.656	5.487	1.519	2.996	1.718
cpd	LS	Both	gene20211	M	.	X	X	X	.	D	gene47127	M	.	.	X	X	U	.	i	1.032	1.257	i	3.011	0.187	i	6.365	3.283	0.025	-0.471	6.882	3.823	6.857	4.294	0.624	0.278	3.235	0.537	2.412	-0.214
nufip1	LS	Lon	gene20468	M	.	.	X	X	.	.	gene11631	M	.	.	.	.	.	.	e	0.357	0.31	i	0.539	0	i	3.069	0	0.113	0	4.201	0	4.087	0	0.347	0	1.032	0	0.945	0
wdr12	LS	Lon	gene36862	M	X	.	X	X	.	.	gene2437	.	.	.	.	X	.	.	e	0.602	0.057	e	0	0.235	i	3.043	0	0.074	0	4.006	0	3.933	0	0.347	-0.52	-0.091	-0.408	-0.331	-0.316
chmp4b	LS	Both	gene14321	M	.	.	X	.	U	.	gene19808	M	.	X	X	.	.	.	i	1.52	1.055	i	2.81	1.625	i	6.431	3.394	-0.51	0.065	6.465	3.692	6.976	3.627	-1.978	0.998	2.314	1.049	1.677	0.821
tfam	LS	Lon	gene7719	M	X	.	X	X	.	.	gene9709	M	.	.	.	.	.	.	i	1.948	0	i	1.116	0	i	3.027	0	0.138	0	3.651	0	3.513	0	0.594	0	0.383	0	0.283	0
atp6v1e1	LS	Lon	gene6868	M	.	.	X	.	U	.	gene15464	M	.	.	.	.	.	.	i	1.073	0	i	1.68	0	i	3.024	0	-1.041	0	3.15	0	4.191	0	1.398	0	0.9	0	1.077	0
cep85	LS	Both	gene1538	M	X	X	X	X	U	.	gene17643	M	.	.	X	X	.	.	i	0.369	0.888	i	2.48	0	i	5.132	2.11	-2.23	0.367	4.721	2.891	6.951	2.525	-1.122	-0.551	3.698	-0.159	2.815	0.743
gps1	LS	Lon	gene2495	M	.	.	X	X	.	.	gene36130	M	.	.	.	.	.	.	i	0.49	0	i	1.355	0	i	3.021	0	-0.163	0	4.741	0	4.905	0	0.606	0	0.694	0	-0.234	0
ras-dva1	LS	Both	gene12722	.	.	X	X	X	U	.	gene9804	.	.	X	X	.	U	.	e	2.81	2.226	e	7.861	4.611	e	8.156	5.157	-1.146	-2.085	7.4	2.868	8.546	4.953	1.303	-0.997	6.885	3.13	4.997	2.686
rhoc	LS	Lon	gene13374	M	X	X	X	X	U	D	gene779	M	.	.	.	.	.	.	i	2.205	0	i	1.923	0	i	2.989	0	0.214	0	4.333	0	4.119	0	1.598	0	1.731	0	0.992	0
cnp	LS	Lon	gene43026	M	.	.	X	.	.	D	gene14097	.	.	.	.	.	.	.	i	1.581	0	i	1.536	0	i	2.986	0	0.467	0	3.059	0	2.592	0	2.784	0	0.789	0	-2.609	0
tspan6	LS	Lon	gene10053	M	.	.	X	.	.	.	gene15738	M	.	.	.	.	.	.	i	1.32	0	e	0	0.378	i	2.979	0	-0.791	0	3.388	0	4.179	0	-0.481	0.048	-0.116	0.418	-0.129	0.5
nucb1	LS	Lon	gene17814	M	.	.	X	.	U	.	gene12683	M	.	.	.	.	.	.	i	0.912	0	i	1.422	0	i	2.976	0	-1.047	0	2.977	0	4.023	0	-0.303	0	-0.013	0	0.265	0
derl2	LS	Lon	gene48654	M	.	.	X	.	.	.	gene9738	M	.	.	.	.	.	.	e	0	1.996	e	0.143	1.791	i	2.973	0	-0.796	0	2.516	0	3.312	0	-0.356	-1.83	-1.116	5.67	0.267	2.524
paics.1	LS	Lon	gene50663	M	X	.	X	.	.	.	gene2739	M	.	.	.	.	.	.	i	2.658	0	i	1.312	0	i	2.971	0	-0.458	0	3.026	0	3.483	0	-0.403	0	-0.014	0	0.654	0
abhd13	LS	Lon	gene12464	M	.	.	X	.	D	.	gene16981	M	.	.	.	.	.	.	i	1.224	0	e	0.03	0.178	i	2.968	0	1.586	0	3.619	0	2.033	0	-0.421	-1.419	0.656	0.188	0.629	0.7
st14	LS	Both	gene42978	M	.	X	X	.	U	D	gene40942	M	.	X	X	X	U	D	i	0	0.918	i	4.403	2.991	i	6.596	3.635	-1.426	-1.673	7.261	4.095	8.687	5.768	0.039	-1.16	4.642	3.547	3.772	2.44
npm3	LS	Both	gene11148	M	.	X	X	.	.	.	gene18447	M	X	.	X	.	U	.	i	0.676	2.487	i	4.907	0	i	6.386	3.437	-0.391	-0.72	7.162	3.478	7.553	4.198	0.766	0.993	4.95	-0.687	4.176	-0.916
neo1	LS	Both	gene1383	M	X	X	X	X	U	D	gene44190	M	X	X	X	X	U	D	i	1.476	1.183	i	4.63	1.568	i	6.651	3.703	-0.118	0.378	6.832	4.274	6.95	3.895	0.642	0.608	3.822	0.968	2.826	0.594
qrich1	LS	Lon	gene38468	M	.	.	X	X	U	.	gene3294	M	.	.	.	.	.	.	i	0.571	0	i	1.099	0	i	2.945	0	-1.274	0	2.11	0	3.384	0	-1.156	0	0.551	0	0.275	0
ccdc9	LS	Lon	gene20490	M	.	.	X	.	U	.	gene18559	M	.	.	.	.	.	.	e	0.247	0.587	i	0.506	0	i	2.945	0	-0.098	0	3.51	0	3.608	0	-0.305	0	0.192	0	0.879	0
rcn3	LS	Lon	gene17653	M	.	.	X	X	.	.	gene13596	.	.	.	.	.	.	.	i	0	0	i	0.203	0	i	2.938	0	1.169	0	3.799	0	2.63	0	0.13	0	-0.365	0	1.263	0
caprin1	LS	Lon	gene7819	M	.	X	X	X	.	D	gene9547	M	.	.	.	X	.	U	i	1.168	2.556	i	1.26	0	i	3.538	0.608	-0.266	-0.308	3.555	0.191	3.822	0.499	-0.854	-2.458	0.664	-2.481	1.643	-0.083
zmiz2	LS	Both	gene49524	M	.	X	X	X	.	.	gene7580	M	.	X	X	X	U	.	i	1.395	1.396	i	3.429	2.549	i	7.542	4.617	0.239	-2.463	6.649	2.172	6.41	4.635	2.411	-0.262	1.707	0.703	0.408	0.957
tgif1	LS	Both	gene13818	M	.	X	X	.	U	D	gene7457	M	X	X	X	X	.	D	i	0.492	2.513	i	6.039	1.572	i	4.446	1.521	-1.465	0.383	4.722	1.395	6.187	1.012	1.357	0.019	5.883	1.233	4.269	1.414
mnt	LS	Lon	gene657	M	X	X	X	X	U	D	gene42161	M	.	.	.	.	.	.	i	1.534	0	i	3.596	0	i	2.915	0	-0.42	0	3.505	0	3.926	0	1.14	0	2.865	0	1.639	0
ern1	LS	Lon	gene46599	M	X	.	X	.	D	.	gene19025	M	.	.	.	.	.	.	i	2.884	0	i	1.041	0	i	2.906	0	0.716	0	3.946	0	3.23	0	0.658	0	1.008	0	0.934	0
nol11	LS	Lon	gene14694	M	.	.	X	X	.	.	gene15499	M	.	.	.	.	.	.	i	0.224	0	i	0.502	0	i	2.879	0	-1.103	0	2.903	0	4.006	0	-0.8	0	1.219	0	0.07	0
scyl3	LS	Lon	gene2786	M	X	.	X	.	U	.	gene1396	M	.	.	.	X	.	.	i	1.551	0	i	0.419	0	i	2.862	0	-0.752	0	3.669	0	4.421	0	-0.465	0	0.149	0	1.311	0
e2f3	LS	Both	gene12405	M	X	X	X	X	U	D	gene3155	M	.	X	X	.	U	.	i	1.157	1.054	i	3.005	1.202	i	5.369	2.512	-0.985	-0.606	5.344	3.551	6.33	4.157	-0.7	-0.165	2.286	0.466	2.686	0.739
cog3	LS	Lon	gene44213	M	X	X	X	.	.	.	gene8326	M	.	.	.	.	.	.	i	1.814	0	i	1.712	0	i	2.855	0	0.787	0	3.668	0	2.88	0	0.549	0	1.16	0	0.658	0
grhl3	LS	Both	gene3469	.	.	X	X	X	U	D	gene3270	.	.	X	X	X	.	D	i	3.395	3.253	i	10.247	6.656	i	12.313	9.46	-0.655	-0.518	12.2	9.763	12.855	10.281	1.131	0.305	10.394	7.501	8.507	5.612
cdh3	LS	Both	gene40611	M	X	X	X	X	.	D	gene47619	M	X	X	X	X	U	D	i	1.463	2.053	i	6.143	5.033	i	7.357	4.516	-0.235	-0.054	7.61	4.49	7.845	4.544	0.711	1.907	6.666	4.813	4.915	2.393
il6st	LS	Lon	gene36893	M	.	X	X	X	U	.	gene34955	M	.	.	.	.	.	D	i	0	0	i	3.28	0	i	2.84	0	-1.333	0	3.108	0	4.441	0	0.442	0	2.689	0	1.554	0
hectd1	LS	Lon	gene9959	M	.	X	X	X	.	D	gene14862	M	.	.	.	X	.	D	i	0.813	0	i	1.686	0	i	2.838	0	0.571	0	3.286	0	2.715	0	0.342	0	1.739	0	0.614	0
rps6kb1	LS	Lon	gene554	M	X	.	X	X	.	.	gene9694	M	.	.	.	.	.	.	i	1.331	0	e	0.266	0.216	i	2.835	0	-0.304	0	3.349	0	3.653	0	-0.56	-0.124	0.053	-0.294	0.533	0.206
smurf1	LS	Lon	gene11156	M	X	.	X	X	U	.	gene12713	M	.	.	.	.	.	.	i	1.332	0	e	0.06	0	i	2.828	0	-0.931	0	4.115	0	5.047	0	-0.177	0.01	0.091	-0.17	0.09	-0.078
nrf1	LS	Lon	gene9809	M	X	.	X	X	U	D	gene12868	M	.	.	.	.	.	.	i	2.059	0	i	0.952	0	i	2.827	0	-0.322	0	3.001	0	3.323	0	0.068	0	0.752	0	-0.259	0
ptk7	LS	Lon	gene15106	M	.	.	X	X	U	.	gene4556	M	.	.	.	X	.	.	i	0.394	0	i	0.571	0	i	2.814	0	-0.502	0	3.812	0	4.314	0	0.164	0	0.365	0	0.531	0
alms1	LS	Lon	gene11575	M	.	.	X	.	U	.	gene14346	M	.	.	.	.	.	.	i	1.196	0	i	1.054	0	i	2.81	0	-0.287	0	3.745	0	4.032	0	-0.468	0	0.596	0	0.935	0
pld3	LS	Lon	gene15792	M	.	.	X	.	.	U	gene43576	.	.	.	.	.	.	.	i	1.042	0	i	0	0	i	2.8	0	0.253	0	3.637	0	3.385	0	-1.304	0	-0.568	0	1.002	0
rab34	LS	Lon	gene1248	.	.	X	X	X	D	D	gene47531	M	.	.	.	.	.	.	e	0.588	0.203	i	2.58	0	i	2.799	0	1.565	0	3.465	0	1.9	0	2.206	0	1.627	0	0.276	0
rae1	LS	Lon	gene20265	M	.	.	X	X	.	.	gene12333	M	.	.	.	.	.	.	i	1.814	1.486	i	0.92	0	i	4.595	1.804	-0.512	-1.229	4.032	1.171	4.544	2.4	-0.891	-0.194	2.127	-1.7	2.894	0.002
ahnak	LS	Lon	gene11108	M	X	X	X	X	U	D	gene44374	.	.	.	.	X	D	.	i	2.179	1.073	i	3.541	0	i	3.19	0.404	-0.124	3.733	5.619	1.412	5.743	-2.321	2.014	1.134	3.768	-2.015	1.878	-3.693
tsnare1l	LS	Lon	gene14698	M	.	.	X	.	U	.	gene3077	M	.	.	.	.	.	D	i	0	2.518	i	1.301	0	i	3.204	0.427	-1.333	-0.057	1.982	0.793	3.315	0.849	0.601	2.256	0.815	-1.977	0.688	-2.199
cactin	LS	Lon	gene5087	M	X	.	X	X	U	.	gene5452	M	.	.	.	.	.	.	i	1.67	0	i	0.534	0	i	2.774	0	-0.539	0	1.948	0	2.488	0	-1.05	0	-0.887	0	0.047	0
cxcr4	LS	Both	gene39088	.	X	X	X	.	.	D	gene13315	.	.	X	X	X	U	D	i	6.055	3.253	i	9.413	5.895	i	11.295	8.522	-0.35	-0.976	11.254	8.38	11.604	9.356	3.144	3.027	8.435	4.636	6.389	3.092
wee1	LS	Both	gene36924	M	.	X	X	X	.	D	gene12847	M	X	.	X	X	U	D	i	0	2.395	i	5.391	1.281	i	7.699	4.927	-0.516	-0.604	6.848	5.181	7.364	5.785	0.786	-0.551	4.025	1.878	3.552	1.857
smarca5	LS	Both	gene47080	M	.	X	X	.	U	D	gene15758	M	X	.	X	.	U	.	i	0.587	1.167	i	2.56	0.539	i	5.425	2.653	-0.182	-0.118	6.135	3.207	6.317	3.326	0.487	-0.36	2.058	-0.214	1.747	0.084
zswim4	LS	Both	gene10975	M	.	X	X	X	.	D	gene8022	M	X	X	X	X	U	D	i	1.132	0	i	4.619	2.535	i	8.248	5.487	-0.022	-0.66	8.479	4.974	8.501	5.634	0.299	3.073	4.679	1.163	3.675	-0.487
cpsf6	LS	Both	gene40718	M	.	X	X	X	U	.	gene15401	M	X	.	X	X	.	.	i	1.192	1.049	i	3.004	0	i	6.47	3.715	-0.336	-0.236	6.883	4.39	7.218	4.626	-1.973	-1.192	3.045	0.369	3.126	0.764
cep170b	LS	Lon	gene4244	M	.	.	X	X	U	.	gene15374	M	.	.	.	.	.	.	i	0.246	0	i	0.859	0	i	2.743	0	-0.152	0	3.698	0	3.85	0	0.342	0	0.359	0	0.702	0
mob3a	LS	Lon	gene8279	M	.	.	X	X	U	.	gene1818	M	.	.	.	.	.	.	i	1.809	0	i	1.015	0	i	2.74	0	-0.411	0	3.673	0	4.084	0	-0.299	0	-0.338	0	0.537	0
polr2h	LS	Lon	gene8459	M	.	X	X	X	.	D	gene39075	M	.	.	.	.	D	.	e	0	1.183	e	1.145	0.179	i	2.738	0	-1.442	0	1.34	0	2.782	0	1.778	-0.335	1.036	1.846	0.333	1.034
ddhd1	LS	Lon	gene7895	M	X	.	X	.	.	.	gene17054	M	.	.	.	.	.	.	i	1.384	0	i	0.246	0	i	2.731	0	-0.47	0	2.684	0	3.155	0	-0.823	0	0.355	0	1.112	0
sag	LS	Lon	gene6304	.	.	X	X	.	D	.	gene7038	.	.	.	.	.	.	.	e	0	0.372	e	3.808	3.812	e	7.61	4.886	0.803	-1.711	7.006	2.675	6.203	4.386	3.075	1.857	0	1.748	1.637	2.573
rasd1	LS	Both	gene15881	.	X	X	X	.	.	D	gene19294	.	X	X	X	.	D	D	e	5.575	3.394	e	9.455	7.725	e	10.322	7.612	0.382	0.161	11.055	7.601	10.673	7.44	1.346	2.554	9.415	6.709	7.153	4.792
snrpd1	LS	Both	gene15254	M	.	.	X	X	.	.	gene18847	M	X	.	X	X	.	.	i	0.432	1.976	e	0	0.195	i	5.433	2.733	-0.246	0.142	6.234	3.489	6.481	3.348	-0.652	-0.703	-0.068	0.342	0.277	0.813
papss1	LS	Lon	gene9525	M	.	.	X	.	U	.	gene10031	M	.	.	.	.	.	.	i	0.397	0	i	0	0	i	2.695	0	-1.184	0	3.784	0	4.968	0	0.064	0	0.129	0	0.435	0
znf852	LS	Lon	gene6107	M	.	.	X	X	.	.	gene19554	M	.	.	.	X	.	D	i	3.252	0.364	i	0	2.447	i	4.709	2.015	0.117	-0.135	5.295	4.687	5.178	4.822	-0.398	0.603	1.056	-1.132	1.504	1.664
slc44a2	LS	Lon	gene536	M	X	X	X	X	U	D	gene2519	M	.	.	.	.	.	.	i	1.685	0	i	2.987	0	i	2.69	0	-0.379	0	3.463	0	3.842	0	0.475	0	2.97	0	2.172	0
fsd1l	LS	Lon	gene1678	M	.	.	X	X	D	D	gene14192	M	.	.	.	.	.	D	i	0.674	0	i	1.034	0	i	2.688	0	2.44	0	3.191	0	0.751	0	1.711	0	0.988	0	0.521	0
ifrd2	LS	Lon	gene3111	M	.	.	X	X	.	.	gene124	M	.	.	.	.	D	.	i	0.131	0	i	0.736	0	i	2.685	0	-0.333	0	2.683	0	3.015	0	0.163	0	0.766	0	0.984	0
ostc	LS	Lon	gene17161	M	.	.	X	X	.	.	gene20002	M	.	.	.	.	.	.	i	0.808	0	i	0.105	0	i	2.68	0	0.009	0	4.174	0	4.165	0	-1.322	0	-0.176	0	2.021	0
gpat4	LS	Lon	gene15153	M	.	.	X	X	U	.	gene11966	M	.	.	.	.	.	.	i	0.81	0	i	0	0	i	2.672	0	-1.127	0	2.556	0	3.683	0	0.251	0	0.442	0	0.214	0
prelid3b	LS	Lon	gene13683	M	.	.	X	.	.	.	gene10636	M	.	.	.	X	.	.	i	1.265	0	i	1.138	0	i	2.664	0	-0.588	0	1.268	0	1.856	0	-0.669	0	1.1	0	0.619	0
tbc1d13	LS	Lon	gene13153	M	.	X	X	X	.	D	gene8366	M	.	.	.	.	.	.	e	0.028	0.136	i	5.517	0	i	2.65	0	0.194	0	3.924	0	3.73	0	1.367	0	4.956	0	4.011	0
yrdc	LS	Lon	gene10374	M	X	.	X	X	.	.	gene20535	M	.	.	.	.	.	D	i	2.269	0	i	0.211	0	i	2.634	0	0.167	0	3.32	0	3.154	0	-0.257	0	-0.003	0	1.228	0
tnpo2	LS	Lon	gene19493	M	.	.	X	X	U	D	gene5851	M	.	.	.	.	.	.	i	0.462	0	i	0.483	0	i	2.631	0	-0.186	0	2.503	0	2.69	0	0.582	0	0.351	0	-0.226	0
dcaf15	LS	Lon	gene11951	M	.	.	X	X	.	.	gene9263	M	.	.	.	.	.	.	i	1.397	0	i	0.553	0	i	2.623	0	-0.794	0	2.738	0	3.532	0	0.714	0	-0.1	0	0.308	0
zzz3	LS	Lon	gene9117	M	X	.	X	X	U	.	gene6151	M	.	.	.	.	.	.	i	1.398	0	i	0.707	0	i	2.613	0	-1.78	0	2.004	0	3.784	0	-0.355	0	0.062	0	0.309	0
ing5	LS	Both	gene18891	M	.	X	X	.	.	.	gene41060	M	.	X	X	.	.	.	e	0.487	0.343	i	5.944	2.943	i	9.289	6.686	-0.546	0.435	9.662	6.114	10.207	5.679	0.505	-0.982	5.919	1.479	5.619	1.259
polr2e	LS	Lon	gene15404	M	.	.	X	X	U	.	gene15900	M	.	.	.	.	.	.	i	1.033	0	i	0	0	i	2.595	0	-0.055	0	3.444	0	3.5	0	-0.3	0	-0.287	0	0.394	0
cep57	LS	Both	gene9375	M	.	X	X	X	U	.	gene13015	M	.	.	X	.	U	.	i	1.548	1.683	i	2.692	0.688	i	5.496	2.907	-0.776	-0.869	5.416	2.44	6.192	3.309	-1.479	-0.012	1.54	-1.139	2.6	0.416
slc34a2	LS	Lon	gene42603	M	.	.	X	X	D	.	gene4762	.	.	.	.	.	.	.	e	0	1.808	e	0.568	2.009	i	2.579	0	5.278	0	2.877	0	-2.401	0	3.099	3.104	-0.846	0.342	-1.303	-0.778
cab39	LS	Lon	gene15922	M	.	.	X	.	.	.	gene13353	M	.	.	.	.	.	.	i	1.192	0	i	0.562	0	i	2.57	0	0.021	0	2.774	0	2.753	0	1.104	0	0.671	0	-0.494	0
crebrf	LS	Lon	gene964	M	X	X	X	.	U	D	gene4118	M	.	.	.	.	.	.	i	1.698	0	i	1.742	0	i	2.57	0	-0.706	0	3.161	0	3.867	0	0.892	0	1.547	0	0.67	0
ppp1cb	LS	Both	gene14079	M	.	X	X	.	U	D	gene14792	M	.	X	X	X	U	.	i	0.863	1.638	i	4.404	3.347	i	6.953	4.385	-0.758	-1.244	6.696	3.869	7.455	5.113	-0.263	-1.143	4.495	2.434	4.044	2.188
zc3hc1	LS	Lon	gene18397	M	.	.	X	X	.	U	gene39577	M	.	.	.	.	.	.	i	1.001	0	e	0.02	0.133	i	2.55	0	-0.336	0	3.639	0	3.974	0	0.069	-0.141	0.149	0.09	0.121	-0.032
klhl15	LS	Lon	gene13592	M	X	.	X	.	.	.	gene14232	M	.	.	.	X	.	.	i	1.971	1.757	e	0.011	0	i	2.703	0.16	0.115	-0.092	3.101	0.3	2.986	0.393	-0.017	0.534	0.022	-0.222	0.168	-0.338
cpsf7	LS	Both	gene1728	M	.	.	X	X	U	.	gene19761	M	.	.	X	X	U	.	i	0.638	0.81	i	0.344	0.109	i	4.196	1.653	-0.371	-1.175	4.5	1.102	4.871	2.278	0.891	-3.097	-0.366	-1.649	0.262	-0.772
ccna2	LS	Both	gene9078	M	.	X	X	.	D	D	gene1546	M	.	.	X	X	U	.	i	1.308	0.813	i	2.8	0.65	i	4.784	2.247	0.662	-0.166	6.519	3.579	5.856	3.745	1.184	-1.301	2.293	0.565	1.415	0.873
setd1a	LS	Lon	gene39555	M	X	.	X	X	U	.	gene45302	M	.	.	.	X	.	.	i	1.614	0	i	0.567	0	i	2.518	0	0.188	0	2.932	0	2.743	0	0.505	0	0.169	0	0.588	0
h3-3b	LS	Both	gene662	M	.	X	X	X	D	D	gene7570	M	.	X	X	X	D	D	i	2.395	0	i	3.391	2.158	i	7.765	5.251	0.885	0.854	8.71	6.691	7.825	5.837	1.209	0.355	2.351	1.534	1.44	1.624
rap2c	LS	unk	gene354	M	.	.	X	.	.	.	gene4911	M	.	.	.	.	.	.	e	0.196	0.183	i	1.32	0	i	4.589	2.08	-0.636	-0.18	5.615	1.972	6.251	2.151	-2.205	-0.557	1.315	-1.095	1.315	-0.174
ddx39a	LS	Both	gene42815	M	X	X	X	X	U	D	gene13485	M	X	X	X	X	U	D	i	1.469	2.515	i	4.238	2.086	i	8.037	5.528	-1.896	-2.593	5.674	3.393	7.57	5.986	-0.482	-0.418	3.758	1.742	2.972	1.41
mmadhc	LS	Lon	gene17870	M	.	.	X	.	.	.	gene14998	M	.	.	.	.	.	.	i	1.293	0	i	1.154	0	i	2.505	0	-0.242	0	3.762	0	4.005	0	-0.044	0	0.138	0	0.371	0
kdm6b	LS	Lon	gene43597	M	X	X	X	X	U	D	gene6742	M	.	.	.	.	.	D	i	2.547	0	i	2.172	0	i	2.501	0	-1.812	0	1.9	0	3.713	0	0.802	0	0.574	0	0.597	0
hypk	LS	unk	gene19365	M	.	.	X	X	.	.	gene798	M	.	.	.	X	D	.	i	0.001	3.128	i	1.548	0	i	4.705	2.225	-0.374	-0.141	5.397	3.179	5.77	3.32	0.609	0.129	1.051	-2.007	0.498	0.571
ankle2	LS	Lon	gene4450	M	.	.	X	X	.	U	gene50429	M	.	.	.	.	.	.	i	0.809	0	i	0.019	0	i	2.475	0	0.076	0	3.252	0	3.176	0	-1.256	0	0.15	0	1.32	0
map3k2	LS	Lon	gene8024	M	.	.	X	X	.	.	gene35240	M	.	.	.	.	.	.	i	0.997	0	i	1.332	0	i	2.471	0	-0.534	0	2.531	0	3.065	0	0.344	0	0.694	0	0.189	0
ventx3.2	LS	Both	gene3475	.	.	X	X	X	.	.	gene9217	.	.	X	X	X	.	.	i	4.252	0	e	6.788	4.476	e	10.001	7.533	0.298	0.014	10.792	7.456	10.494	7.442	2.104	1.498	4.76	3.631	4.113	0.194
rrp9	LS	Lon	gene9252	M	.	.	X	.	U	.	gene14091	M	.	.	.	X	.	.	i	1.021	3.024	e	0.264	0.208	i	2.724	0.26	-1.162	-0.754	2.246	0.615	3.408	1.369	0.192	0.258	0.128	0.236	0.23	0.269
sec14l3	LS	Both	gene734	.	.	X	X	.	D	D	gene13569	.	.	.	X	.	D	D	e	0	0.192	i	6.853	2.939	i	8.12	5.665	1.858	0.314	8.434	7.803	6.576	7.488	5.15	3.915	4.918	2.312	0	0.091
btbd6	LS	unk	gene15224	M	X	X	X	X	.	D	gene479	M	.	.	.	.	.	.	i	2.811	0	i	5.083	2.939	i	6.411	3.958	0.475	-0.191	6.493	3.318	6.018	3.508	3.367	-0.356	3.648	2.268	1.09	2.362
f11r	LS	Lon	gene3290	M	.	.	X	X	U	.	gene18413	M	.	.	.	X	U	.	i	2.548	0.674	i	0.169	0.844	i	3.937	1.484	-1.396	-2.16	3.559	1.616	4.955	3.776	-1.12	-0.053	-0.007	-0.187	0.481	0.23
nudc	LS	Both	gene1446	M	X	.	X	X	U	.	gene11924	M	.	.	X	.	.	.	i	1.949	1.17	i	1.984	0.832	i	3.89	1.44	-1.159	-0.154	4.08	1.246	5.239	1.401	1.27	0.587	1.592	0.581	1.748	0.814
kpna2	LS	unk	gene1991	M	.	.	X	X	.	.	gene1600	M	.	.	.	X	.	.	i	1.808	1.135	i	1.008	1.621	i	4.197	1.749	-0.997	-0.197	3.249	1.658	4.246	1.855	0.959	1.052	1.906	0.326	0.572	-0.063
ptpn4	LS	Lon	gene11858	M	X	X	X	X	U	.	gene18650	M	.	.	.	.	.	.	i	1.956	0	i	0.916	0	i	2.442	0	-0.096	0	3.462	0	3.557	0	0.698	0	0.264	0	0.632	0
utp25	LS	Lon	gene2827	M	.	.	X	.	.	.	gene5327	M	.	.	.	.	.	.	i	1.343	0	e	0	0.088	i	2.441	0	-0.323	0	1.484	0	1.807	0	0.217	0.163	-0.159	0.073	-0.15	0.132
ssu72	LS	Both	gene18539	M	X	.	X	X	U	.	gene15715	M	X	.	X	X	.	.	i	2.226	1.569	i	1.697	0.992	i	5.602	3.174	0.287	-0.049	5.989	4.073	5.702	4.122	0.6	0.756	1.798	1.013	1.174	0.246
ccnb1.2	LS	Both	gene8397	M	.	X	X	.	.	D	gene20026	M	.	.	X	X	U	.	i	0.61	0.618	i	3.404	1.088	i	6.525	4.101	-0.112	-0.592	6.64	3.904	6.752	4.496	1.881	0.442	2.401	0.526	1.312	0.591
naa50	LS	Both	gene7691	M	.	.	X	.	.	.	gene37837	M	.	.	X	.	U	.	i	0.81	0.004	i	2.78	1.273	i	7.05	4.627	0.016	-0.667	7.961	4.623	7.945	5.29	-2.103	-1.307	5.459	0.314	5.238	1.262
nxf1	LS	Lon	gene12839	M	X	.	X	X	U	.	gene1909	M	.	.	.	X	.	U	i	1.465	3.225	i	0.723	0.597	i	3.542	1.129	-0.529	-0.111	4.132	2.528	4.662	2.639	-0.049	-1.129	0.265	-0.298	0.787	0.753
kiaa1522	LS	Both	gene35270	M	X	X	X	X	U	D	gene11795	M	.	.	X	X	U	D	i	1.547	0.811	i	5.134	1.433	i	6.09	3.677	-1.06	-2.218	7.497	4.44	8.557	6.659	0.556	0.702	5.532	2.139	4.401	0.726
dnajc14	LS	Lon	gene5167	M	.	.	X	.	.	.	gene1253	M	.	.	.	.	.	.	e	0.274	0.599	i	0.327	0	i	2.41	0	-0.023	0	3.648	0	3.671	0	0.675	0	-0.687	0	0.246	0
ucp2	LS	Both	gene12302	M	X	X	X	.	U	D	gene7320	M	X	X	X	.	U	D	i	2.362	5.84	i	3.711	2.619	i	4.523	2.116	0.164	-0.616	5.285	1.76	5.121	2.376	1.452	2.441	3.682	2.737	2.601	0.298
ephb3	LS	Both	gene9595	M	X	X	X	X	D	D	gene4858	M	.	X	X	X	D	D	i	2.81	1.055	i	3.899	3.981	i	7.092	4.687	2.682	2.091	7.498	5.838	4.817	3.746	2.742	3.832	3.779	3.227	0.252	0.087
rbm8a	LS	Lon	gene6927	M	.	.	X	X	.	.	gene868	M	.	.	.	X	.	.	i	0.368	1.811	i	0.752	0.415	i	5.05	2.646	-0.601	-0.793	4.4	3.546	5.001	4.339	0.581	-0.238	-0.275	0.906	0.518	1.256
pard6b	LS	Both	gene47669	M	X	X	X	.	U	D	gene9350	M	.	X	X	.	U	D	i	4.81	1.81	i	5.634	3.693	i	8.245	5.842	-1.095	-2.248	7.743	4.691	8.838	6.939	0.591	-0.915	5.882	3.749	4.125	3.195
eif3l	LS	Lon	gene7212	M	.	.	X	.	.	.	gene11320	M	.	.	.	.	.	.	i	1.975	0	i	0	0	i	2.384	0	0.23	0	3.936	0	3.706	0	-1.062	0	-0.825	0	0.618	0
raver1	LS	Lon	gene46345	M	.	X	X	.	.	D	gene18610	M	.	.	.	.	.	.	i	1.011	0	i	2.108	0	i	2.375	0	-0.739	0	1.92	0	2.659	0	0.691	0	1.435	0	-0.156	0
hhex	LS	Both	gene48431	.	.	X	X	X	U	D	gene38233	M	.	X	X	X	U	D	e	0.043	0	i	8.607	6.2	i	9.126	6.755	-1.433	-0.735	8.288	6.033	9.72	6.768	2.231	6.21	7.789	4.642	4.994	-0.767
bcl9l	LS	Lon	gene17650	M	.	.	X	.	.	.	gene123	M	.	.	.	.	.	.	e	0.561	0.363	i	1.359	0	i	2.364	0	0.283	0	3.87	0	3.587	0	0.041	0	1.396	0	0.99	0
rhbdd2	LS	Both	gene19993	M	X	X	X	X	D	.	gene36195	M	.	.	X	X	U	.	i	2.728	0.609	i	1.999	0	i	7.087	4.734	1.907	-0.715	8.008	5.358	6.101	6.073	0.458	-0.484	1.218	-1.382	1.043	0.643
gnai1	LS	Both	gene3589	M	.	X	X	X	U	D	gene624	M	X	.	X	.	.	.	i	0	1.68	i	4.106	0.773	i	4.735	2.406	-0.8	-0.305	4.888	2.79	5.687	3.095	0.116	-0.169	4.124	1	2.988	0.148
kdm3a	LS	Both	gene45486	M	.	X	X	X	U	.	gene39013	M	X	X	X	X	U	.	i	0.045	1.04	i	1.947	1.118	i	5.473	3.147	-0.303	-1.072	4.685	2.082	4.988	3.153	1.165	0.763	0.897	0.341	0.154	0.234
ccne1	LS	Both	gene4820	M	.	X	X	X	U	.	gene323	M	X	.	X	X	U	.	i	0.945	2.211	i	1.689	0.199	i	3.847	1.529	-0.4	-0.418	4.535	2.311	4.934	2.729	-1.464	-0.275	1.754	-1.114	1.923	-0.389
gon4l	LS	Lon	gene14798	M	.	.	X	X	.	.	gene38561	M	.	.	.	X	.	.	i	1.328	0.81	i	0.282	0	i	3.252	0.94	-0.173	0.576	2.756	1.579	2.93	1.003	0.942	0.292	0.104	-1.927	0.135	-0.052
usp33	LS	Lon	gene38545	M	.	.	X	X	U	.	gene39632	M	.	.	.	.	.	.	i	0.9	0	i	0	0	i	2.307	0	-0.171	0	2.607	0	2.778	0	-0.778	0	0.107	0	-0.432	0
foxi4.2	LS	Both	gene16107	.	X	X	X	X	.	D	gene79	.	X	X	X	X	D	D	e	4.837	6.712	e	9.931	7.483	e	12.506	10.206	0.066	1.284	11.639	9.65	11.573	8.366	3.525	4.597	9.311	7.085	6.75	2.973
fbxo5	LS	Lon	gene14368	M	.	X	X	X	U	.	gene2254	M	.	.	.	X	U	.	i	1.395	3.163	e	1.001	1.091	i	3.489	1.193	-1.245	-2.383	4.335	0.667	5.58	3.05	0.254	0.072	0.899	1.055	0.374	1.252
smc3	LS	Lon	gene37725	M	.	.	X	X	U	.	gene9432	M	.	.	.	X	.	.	i	0.538	0.594	i	1.072	0.113	i	2.783	0.49	-0.325	-0.285	3.138	2.02	3.463	2.306	-0.334	-0.55	0.615	-1.491	0.979	0.553
plpp3	LS	Both	gene40314	.	.	X	X	.	D	D	gene17745	.	.	X	X	.	D	D	e	1.588	0	i	11.389	7.602	i	11.623	9.33	2.078	1.643	13.264	9.812	11.186	8.169	3.031	2.03	11.216	6.403	8.694	5.137
irx3	LS	unk	gene17580	.	.	X	X	X	.	.	gene15512	.	.	.	.	X	.	.	i	3.252	0	e	7.352	6.881	e	7.693	5.401	-0.733	-0.736	7.181	4.67	7.914	5.406	1.445	1.716	6.583	5.848	4.13	4.319
abce1	LS	Lon	gene1725	M	X	.	X	X	.	.	gene19372	M	.	.	.	.	.	.	i	1.537	0	i	0.221	0	i	2.291	0	-0.177	0	3.378	0	3.555	0	-1.048	0	-0.016	0	0.75	0
hdac1	LS	Both	gene11397	M	.	X	X	X	U	D	gene5062	M	X	X	X	X	U	.	i	0.732	1.629	i	3.482	1.643	i	5.881	3.595	0.249	-1.753	6.188	2.585	5.939	4.338	0.943	0.377	3.19	1.023	2.215	1.238
dhrs3	LS	Both	gene19346	M	X	X	X	X	D	D	gene6807	M	X	X	X	X	D	D	i	4.033	1.568	i	5.639	3.192	i	6.339	4.059	1.235	1.471	5.814	4.939	4.579	3.468	2.759	0.809	4.826	2.707	1.998	1.579
impdh2	LS	Lon	gene5125	M	X	.	X	X	.	.	gene17625	M	.	.	.	X	.	.	e	1.169	0	i	0.546	0	i	2.279	0	-0.585	0	1.879	0	2.464	0	-1.699	0	0.672	0	1.105	0
tmem45b	LS	Lon	gene3979	M	.	.	X	X	D	.	gene17765	M	.	.	.	.	.	.	i	1.073	0	e	0.001	0	i	2.276	0	1.225	0	3.928	0	2.703	0	0.567	-0.312	0.079	-0.016	-0.068	-0.13
nradd	LS	Both	gene41563	.	X	X	X	X	.	D	gene19686	.	X	X	X	X	.	D	e	3.461	4.617	i	7.353	6.787	i	8.093	5.822	-0.468	-0.618	8.037	6.183	8.505	6.801	1.193	-1.399	7.953	6.355	5.533	5.124
scaf4	LS	Both	gene20273	M	.	X	X	X	.	D	gene36232	M	X	X	X	X	U	D	i	0.432	1.5	i	3.858	2.709	i	6.178	3.913	-0.187	-0.05	6.378	4.889	6.565	4.939	0.14	-0.781	4.025	2.485	3.178	2.739
efs	LS	Both	gene8168	.	.	X	X	X	U	D	gene11210	.	.	X	X	X	.	.	e	0.395	0	i	10.044	3.147	i	6.553	4.293	-0.735	-0.809	7.961	3.865	8.697	4.673	4.892	0.012	9.562	2.314	4.853	0.683
tut7	LS	Lon	gene9847	M	.	.	X	X	.	.	gene40684	M	.	.	.	.	.	.	i	0.77	0	i	0	0	i	2.26	0	-0.141	0	2.7	0	2.842	0	0.358	0	-1.368	0	-0.352	0
rbm45	LS	Both	gene19973	M	.	.	X	X	.	.	gene10046	M	.	.	X	X	U	.	i	1.811	1.002	i	0	0.62	i	6.613	4.353	0.774	-0.738	7.348	4.32	6.574	5.058	0.917	-1.727	0	-1	3.53	0.691
kif20a	LS	Lon	gene12180	M	.	.	X	X	D	.	gene3563	M	.	.	.	.	.	.	i	1.183	0	i	0	0	i	2.26	0	1.269	0	3.169	0	1.899	0	-0.056	0	0.212	0	0.648	0
usf3	LS	Lon	gene9811	M	.	.	X	.	.	.	gene5895	M	.	.	.	.	.	.	e	0.169	0.222	i	0	0	i	2.259	0	-0.676	0	3.584	0	4.26	0	-2.049	0	0.766	0	1.882	0
map2k1	LS	Both	gene7745	M	.	X	X	.	D	.	gene16662	M	X	X	X	.	U	.	i	0.591	1.718	i	2.788	2.538	i	6.705	4.45	2.86	0.287	8.255	4.087	5.395	3.8	-0.547	0.74	2.238	1.422	2.088	1.293
ppp2r3b	LS	Lon	gene1206	M	X	.	X	X	.	.	gene6938	.	.	.	.	.	.	.	i	1.12	0	e	0.549	0	i	2.227	0	0.175	0	2.809	0	2.635	0	0.168	0	0.558	0	0.593	0
abcf2	LS	Lon	gene6381	M	.	.	X	X	.	.	gene37485	M	.	.	.	.	U	.	i	0.487	0	i	1.443	0	i	3.333	1.108	-0.37	-1.693	3.806	0.802	4.176	2.495	0.931	0.849	1.254	-0.142	1.036	-0.082
ruvbl1	LS	Lon	gene17014	M	.	.	X	X	U	.	gene17476	M	.	.	.	.	.	.	i	0.92	0	i	1.213	0	i	2.224	0	-0.633	0	3.149	0	3.782	0	0.244	0	0.754	0	0.95	0
ip6k2	LS	Both	gene19547	M	.	.	X	.	D	D	gene3786	M	.	.	X	X	D	D	i	1.227	0.394	i	2.088	1.794	i	5.774	3.55	1.814	0.765	6.626	3.925	4.812	3.16	2.492	2.912	2.549	0.314	1.3	0.228
notch1	LS	Both	gene48394	M	X	X	X	X	U	D	gene49280	M	X	X	X	X	.	D	i	0.367	2.497	i	6.782	3.946	i	8.265	6.046	-0.348	0.348	8.234	5.79	8.582	5.442	1.49	2.064	6.645	3.903	4.909	1.768
nfe2l1	LS	Both	gene12390	M	.	X	X	X	D	.	gene13593	M	.	.	X	X	D	.	i	0.813	2.138	i	2.859	1.878	i	5.84	3.623	1.731	0.375	5.712	4.769	3.981	4.394	0.092	1.099	1.448	1.32	1.843	1.1
gpt	LS	Lon	gene20048	M	.	.	X	.	D	D	gene10370	M	.	.	.	.	.	.	i	1.805	0	i	1.8	0	i	2.207	0	1.887	0	1.671	0	-0.217	0	3.212	0	2.384	0	-0.154	0
calr	LS	Both	gene477	M	.	X	X	X	D	D	gene38918	M	.	X	X	X	.	.	i	3.395	0.811	i	8.567	5.875	i	8.295	6.089	0.891	-0.817	8.622	5.807	7.731	6.623	3.87	1.921	7.577	3.485	5.614	3.088
cbs	LS	Lon	gene18688	M	.	X	X	.	U	.	gene14496	M	.	.	.	.	.	.	i	1.587	0	i	2.503	0	i	2.187	0	-1.919	0	1.855	0	3.774	0	0.707	0	2.115	0	1.134	0
tamalin	LS	Both	gene9277	M	.	X	X	.	.	D	gene7739	M	X	X	X	X	U	D	i	0.225	2.002	i	5.758	5.8	i	8.841	6.656	0.421	-0.865	6.251	5.684	5.83	6.55	2.768	1.169	5.403	5.658	2.339	4.137
trhd	LS	Lon	gene39420	M	.	.	X	X	.	.	gene19849	M	.	.	.	.	.	.	i	0.42	0	i	0.324	0	i	2.179	0	-0.447	0	2.802	0	3.249	0	-0.06	0	0.443	0	0.341	0
rrp1b	LS	unk	gene12215	M	.	.	X	.	.	.	gene14718	M	.	.	.	X	.	.	i	1.809	3.188	i	0.116	0	i	4	1.821	-0.176	-0.057	4.076	1.932	4.252	1.989	-0.233	0.418	0.305	-0.754	0.444	-0.028
gnaq	LS	Both	gene8346	M	.	X	X	X	.	D	gene46068	M	.	X	X	X	D	D	i	0.307	1.119	i	3.487	3.272	i	5.769	3.597	0.633	0.975	5.434	4.323	4.801	3.348	0.39	1.365	3.485	2.791	1.943	1.582
epha4	LS	Both	gene18257	.	X	X	X	X	D	D	gene35973	M	.	X	X	X	U	D	i	5.252	0.488	i	9.071	7.168	i	9.817	7.645	0.84	0.223	10.09	8.058	9.25	7.834	2.898	3.639	8.205	6.587	5.349	3.133
fbxo28	LS	Both	gene15838	M	.	X	X	X	U	.	gene156	M	.	X	X	X	U	.	i	2.81	0.605	i	5.628	2.483	i	7.454	5.283	-1.023	-0.207	7.743	5.621	8.765	5.828	1.304	0.538	4.752	1.841	4.527	1.444
mphosph8	LS	Both	gene7866	M	X	X	X	.	U	D	gene8894	M	X	X	X	X	U	.	i	2.159	1.304	i	4.679	2.195	i	5.564	3.394	-1.48	-1.381	3.201	2.885	4.681	4.266	1.343	0.025	4.561	1.602	1.528	1.504
marf1	LS	Lon	gene6024	M	.	.	X	X	U	.	gene16001	M	.	.	.	.	.	.	i	0.718	0	i	0.124	0	i	2.161	0	-0.469	0	2.325	0	2.794	0	-1.466	0	-0.129	0	0.597	0
sdc4	LS	Both	gene16414	M	.	X	X	X	U	D	gene49668	M	X	X	X	X	.	D	i	1.488	2.473	i	6.029	3.757	i	8.06	5.903	-0.564	-0.315	8.18	5.833	8.745	6.148	4.38	0.556	5.501	2.822	1.09	1.63
myh9	LS	Lon	gene5948	M	X	X	X	.	U	D	gene2099	M	.	.	.	.	.	.	i	0.885	0	i	2.317	0	i	2.156	0	0.049	0	3.354	0	3.305	0	1.654	0	1.484	0	0.515	0
sap130	LS	Lon	gene4303	M	X	.	X	.	U	.	gene9737	M	.	.	.	.	.	.	i	1.287	0	i	0.282	0	i	2.155	0	-0.769	0	3.127	0	3.896	0	-0.202	0	-0.373	0	1.072	0
arf1	LS	Both	gene9642	M	.	X	X	X	.	D	gene10022	M	.	X	X	X	U	.	e	0.318	0	i	5.816	2.318	i	6.221	4.072	0.174	-1.179	7.125	3.964	6.951	5.143	1.237	-0.454	5.416	1.896	2.904	2.021
tp53	LS	unk	gene42862	M	.	.	X	.	U	.	gene41018	M	.	.	.	.	.	.	i	1.221	1.809	i	0.102	0.205	i	6.157	4.014	-1.439	-1.563	2.32	1.496	3.76	3.059	0.116	0.2	-0.098	0.32	0.328	0.085
cacul1	LS	Lon	gene5093	M	.	X	X	.	.	.	gene20373	M	.	.	.	X	.	.	i	0.806	1.023	i	2.758	0	i	3.53	1.405	-0.096	-0.036	4.108	0.854	4.204	0.889	-0.186	0.411	2.828	-1.643	2.196	-0.678
has2	LS	Both	gene7237	.	.	X	X	.	.	D	gene39058	.	.	X	X	X	.	D	e	3.253	0	i	7.607	5.129	i	10.861	8.747	0.31	-0.871	11.073	8.922	10.763	9.793	1.6	0.011	6.427	5.328	4.045	3.118
pkdcc.2	LS	Both	gene15740	.	.	X	X	X	U	D	gene2163	.	.	X	X	X	U	D	i	4.252	0	i	10.202	6.897	i	8.546	6.433	-1.578	-1.318	6.653	5.09	8.231	6.408	1.472	4.025	10.265	6.249	7.494	1.969
itprip	LS	Both	gene50590	.	.	.	X	X	.	.	gene9761	.	.	.	X	X	.	.	i	4.253	0	i	3.397	0	i	9.139	7.027	0.359	0.963	9.568	6.968	9.209	6.005	1.498	0	1.755	0	1.637	0
fzd10	LS	Lon	gene13313	.	.	X	X	X	D	D	gene2331	.	.	.	.	X	.	D	e	2.547	0.488	e	3.43	2.407	e	3.36	1.25	1.186	1.073	4.215	1.638	3.03	0.566	2.14	1.117	2.818	1.735	0.938	-0.014
arid3b	LS	Both	gene45696	M	X	X	X	X	U	U	gene37318	M	X	X	X	X	U	.	i	1.358	1.723	i	3.617	2.842	i	5.7	3.591	-3.434	-1.964	3.394	2.619	6.828	4.583	-1.679	-1.139	2.404	1.804	2.783	2.199
rnf4	LS	Lon	gene38490	M	.	.	X	.	.	.	gene11200	M	.	.	.	.	.	.	i	1.457	0	e	0	0.189	i	2.099	0	0.065	0	2.603	0	2.538	0	0.086	-0.009	0.367	0.816	0.262	0.6
crkl	LS	Both	gene11346	M	.	X	X	.	.	D	gene6534	M	X	X	X	.	U	D	i	0.81	1.724	i	3.945	3.253	i	6.708	4.61	-0.253	-0.311	6.992	4.961	7.245	5.272	0.593	0.397	3.617	2.307	2.342	1.619
hic2	LS	Both	gene37354	M	X	X	X	X	D	D	gene8930	M	X	X	X	.	D	D	i	1.588	1.811	i	4.595	2.193	i	6.678	4.586	1.716	2.353	4.856	4.334	3.14	1.981	3.794	2.399	3.756	1.931	0.086	-0.84
sec23ip	LS	Lon	gene16455	M	.	.	X	X	.	.	gene46072	M	.	.	.	.	.	.	e	0.337	0	i	0.606	0	i	2.089	0	-0.243	0	2.657	0	2.9	0	-0.053	0	0.018	0	0.402	0
adcyap1	LS	Lon	gene19245	.	.	X	X	.	.	.	gene50106	.	.	.	.	.	.	.	i	0	0.365	i	5.445	2.325	i	5.346	3.27	-1.487	2.036	5.942	4.152	7.429	2.117	2.071	-0.943	4.923	2.328	1.637	0.186
tlcd2	LS	Lon	gene9342	M	.	.	X	.	U	D	gene6137	M	.	.	.	.	.	.	i	2.032	0	i	0.558	0	i	2.07	0	-0.834	0	2.457	0	3.291	0	-0.357	0	0.359	0	0.484	0
cnot1	LS	Both	gene6913	M	X	X	X	X	.	D	gene8877	M	X	.	X	X	U	.	i	1.299	1.34	i	1.551	0.189	i	4.295	2.228	0.104	-1.355	4.108	1.737	4.004	3.092	-0.359	-0.721	0.882	0.372	1.116	0.831
plekhn1	LS	Both	gene37861	.	.	X	X	X	D	D	gene36182	M	.	X	X	X	U	D	i	0	1.487	i	5.491	2.909	i	7.405	5.338	1.351	0.337	5.857	3.081	4.506	2.744	4.573	1.784	4.424	1.919	-0.091	0.275
acer3	LS	Both	gene18246	M	.	X	X	X	U	D	gene10010	M	.	.	X	X	U	D	i	1.092	0	i	3.648	0.65	i	4.315	2.249	-0.726	-1.209	3.605	2.123	4.33	3.332	0.867	-0.032	3.585	0.316	2.379	0.395
dipk2a	LS	Both	gene37279	M	X	X	X	.	U	D	gene15455	M	X	X	X	.	.	D	i	1.341	4.225	i	6.276	4.477	i	7.947	5.892	-0.191	-0.52	7.652	5.741	7.842	6.26	1.792	1.144	5.332	3.94	3.728	2.654
leng8	LS	unk	gene11782	M	X	.	X	X	.	.	gene1651	M	.	.	.	X	.	.	i	1.444	0.64	i	1.655	0	i	4.47	2.416	-0.007	0.252	5.41	3.478	5.418	3.226	-1.321	-1.684	1.662	0.384	2.306	1.066
birc2	LS	Both	gene13981	M	.	X	X	X	U	D	gene11710	M	.	X	X	X	.	D	i	1.487	0	i	5.6	4.354	i	7.058	5.006	-0.208	0.651	7.783	5.764	7.991	5.113	1.245	1.714	6.3	3.537	3.683	1.671
rabgap1l	LS	Both	gene1216	M	X	X	X	X	D	D	gene10021	M	.	X	X	.	.	D	i	1.688	0.019	i	4.589	2.427	i	6.656	4.608	0.952	-0.27	6.75	4.781	5.798	5.052	2.129	0.051	5.289	2.496	2.183	0.904
klhl20	LS	Lon	gene20458	M	.	.	X	X	.	.	gene10371	M	.	.	.	.	.	.	i	1.199	0	i	0.259	0	i	2.037	0	0.203	0	3.329	0	3.126	0	-0.332	0	1.258	0	1.204	0
dusp6	LS	Both	gene6308	M	X	X	X	.	.	.	gene593	M	X	X	X	X	.	D	e	1.227	1.497	i	4.998	4.084	i	7.849	5.834	0.275	-0.516	8.345	6.315	8.07	6.831	0.756	0.76	3.311	3.943	3.259	3.405
tnpo3	LS	Both	gene47234	M	.	X	X	X	U	.	gene35292	M	X	.	X	X	U	.	i	0	1.672	i	2.473	0.854	i	6.66	4.649	-1.012	0.062	6.577	5.731	7.589	5.669	0.692	0.282	1.709	1.119	1.63	1.408
snrpb	LS	Both	gene47961	M	.	.	X	X	.	.	gene5140	M	.	.	X	X	.	.	i	0.488	1.395	i	1.358	0	i	6.113	4.105	0.04	-0.676	6.661	3.919	6.621	4.595	-0.078	-0.27	1.313	0.122	2.092	0.549
snrnp70	LS	Both	gene11382	M	.	X	X	X	.	D	gene4770	M	X	X	X	X	U	D	i	1.488	2.246	i	4.904	3.906	i	8.136	6.136	0.328	-0.218	8.433	6.363	8.105	6.581	1.523	0.472	4.561	4.486	3.147	3.009
fdps	LS	unk	gene262	M	.	.	.	.	U	.	gene18314	M	.	.	X	.	.	.	i	1.082	0.364	i	1.907	2.571	i	5.447	3.45	-1.931	-0.612	5.276	2.256	7.206	2.868	0.606	1.228	3.483	1.181	2.084	-0.262
birc5l	LS	Lon	gene17619	M	.	.	X	.	.	.	gene7185	M	.	.	.	X	.	.	i	3.395	0	i	1.036	2.296	i	4.289	2.295	-0.155	-0.151	4.738	2.713	4.893	2.864	-0.987	1.418	0.32	0.564	0.943	-0.49
fam193b	LS	Lon	gene2812	M	.	.	X	.	D	.	gene19820	M	.	.	.	.	.	.	i	0.588	0	i	0	0	i	1.978	0	2.212	0	2.669	0	0.457	0	0.833	0	-1.235	0	-0.535	0
esrp1	LS	Lon	gene8023	M	X	.	X	X	D	.	gene8815	M	.	.	.	.	.	.	i	1.334	0	i	0.471	0	i	1.976	0	1.09	0	3.778	0	2.689	0	0.112	0	0.117	0	0.583	0
cnn2	LS	Both	gene13123	.	.	X	X	X	.	D	gene4165	.	X	X	X	X	D	D	e	0	4.132	i	5.886	2.348	i	8.221	6.252	0.492	2.523	9.728	6.677	9.236	4.154	2.821	2.933	5.763	1.466	1.637	-0.645
usp39	LS	Lon	gene19538	M	.	.	X	X	.	.	gene46038	M	.	.	.	.	.	.	i	0	0.812	i	0	1.117	i	3.042	1.073	0.376	-1.129	4.106	2.779	3.73	3.908	-0.274	0.122	0.049	2.24	0.954	0.573
usp53	LS	Both	gene3965	M	.	X	X	X	.	D	gene38372	M	.	X	X	.	U	.	i	0.225	0.864	i	4.955	2.904	i	7.095	5.127	-0.135	-0.44	7.316	5.43	7.451	5.87	1.663	-0.308	3.352	1.848	2.225	2.393
rps3	LS	Both	gene7927	M	.	.	X	X	U	.	gene7116	M	.	.	X	X	.	.	i	0	1.296	i	0	0	i	4.43	2.468	-0.062	0.369	5.206	3.129	5.268	2.76	-0.202	-0.281	0.966	-0.159	0.091	0.236
lefty	LS	Both	gene3712	.	.	X	X	.	.	D	gene14493	.	.	X	X	X	.	.	i	0	3.252	e	7.144	6.048	e	11.033	9.08	0.249	0.192	10.753	9.659	10.504	9.467	3.596	2.186	6.67	5.458	3.116	4.339
ino80e	LS	Lon	gene49678	M	.	.	X	.	U	.	gene50310	M	.	.	.	.	.	.	i	0.079	0	i	0.604	0	i	1.953	0	-0.102	0	2.658	0	2.76	0	-0.787	0	0.477	0	0.473	0
slc35e1	LS	Both	gene10333	M	X	.	X	X	.	.	gene14979	M	X	.	X	.	.	.	i	3.129	0.809	i	1.045	1.287	i	3.711	1.76	-0.118	0.946	4.173	2.492	4.291	1.545	-0.247	0.884	-0.419	0.613	0.943	0.146
mau2	LS	Lon	gene2561	M	X	.	X	X	.	.	gene42242	M	.	.	.	.	.	.	i	1.394	0	i	0.645	0	i	1.949	0	0.058	0	2.503	0	2.445	0	-0.131	0	0.504	0	0.815	0
rpl17	LS	Both	gene7526	M	.	.	X	X	U	.	gene6895	M	.	.	X	X	.	.	i	0.488	1.588	i	1.368	0.087	i	5.856	3.909	-0.28	-0.109	6.18	4.184	6.461	4.293	-1.391	1.139	1.636	-0.069	2.082	-0.442
pa2g4	LS	Both	gene10979	M	X	X	X	.	U	D	gene14012	M	X	X	X	X	.	.	i	2.348	2.489	i	2.822	1.948	i	4.505	2.559	-0.006	0.39	5.05	3.538	5.056	3.148	0.548	0.413	2.775	1.358	1.909	0.295
hes3	LS	Lon	gene8908	.	.	X	X	X	.	D	gene35204	.	.	.	.	X	.	.	i	0	0	e	9.947	5.42	e	5.49	3.551	0.973	0.828	5.395	4.714	4.422	3.887	2.819	-0.008	9.824	4.343	7.032	4.478
scamp5.2	LS	Lon	gene3559	M	X	.	X	.	.	.	gene19638	M	.	.	.	.	.	.	i	2.076	0	e	0	0.389	i	1.934	0	0.105	0	3.281	0	3.176	0	0.028	0.111	0.157	0.56	-0.152	0.578
cks2	LS	Both	gene3934	M	.	.	X	X	.	.	gene15508	M	.	X	X	X	D	U	i	0.489	1.81	i	0.955	0.148	i	4.737	2.823	-0.367	-0.153	5.647	3.591	6.014	3.743	1.134	-1.221	1.542	-0.769	0.671	1.005
ctps1	LS	Both	gene14814	M	.	.	X	X	.	.	gene5660	M	X	.	X	.	U	.	i	0.382	2.03	i	0	0.462	i	3.651	1.758	-1.158	-1.484	0.723	0.797	1.88	2.281	-0.916	-0.198	-0.727	-0.314	0.187	0.418
gar1	LS	Both	gene47037	M	.	.	X	X	.	.	gene17265	M	.	.	X	X	U	.	i	0.673	1.543	i	1.592	0	i	5.101	3.213	-0.311	-0.991	6.024	3.973	6.335	4.963	-4.92	-1.588	1.73	-2.49	2.592	0.471
sap18	LS	unk	gene6748	M	.	.	X	X	.	.	gene5633	M	.	.	.	X	U	.	i	1.226	0	i	2.825	0	i	8.304	6.418	-0.112	-0.287	8.503	8.224	8.615	8.511	-1.832	-0.404	1.754	0	2.527	2.544
kansl1	LS	Both	gene11855	M	X	X	X	X	U	D	gene9951	M	X	X	X	X	.	D	i	2.158	2.438	i	4.294	2.515	i	6.435	4.552	-0.226	-0.214	6.469	4.829	6.695	5.043	0.334	0.681	4.258	2.672	3.34	1.055
bag4	LS	Both	gene2849	M	.	.	X	X	.	.	gene16808	M	.	.	X	.	.	.	i	0	1.806	i	2.538	0.885	i	6.768	4.894	-0.441	-1.177	5.578	1.576	6.018	2.753	2.492	-0.621	2.125	0.163	-0.798	0.433
rpl4	LS	Both	gene4958	M	.	.	X	X	.	.	gene11398	M	.	.	X	X	.	.	i	0.893	0.432	i	1.628	0.109	i	3.857	2	0.052	-0.456	3.987	2.018	3.935	2.474	0.382	-0.699	1.59	0.705	1.573	1.14
gspt1	LS	Both	gene17145	M	.	X	X	X	U	D	gene9843	M	.	X	X	X	U	U	i	0.766	0.674	i	2.119	1.545	i	5.544	3.692	-0.474	-1.535	6.251	3.721	6.725	5.255	-1.414	-1.824	2.176	0.325	2.432	1.663
taf4	LS	Both	gene37839	M	.	X	X	.	.	D	gene39548	M	X	X	X	X	U	.	i	1.166	2.1	i	5.143	1.809	i	7.024	5.173	-0.168	-0.269	7.214	4.934	7.382	5.202	0.665	0.034	4.591	1.284	3.854	0.731
prc1	LS	Both	gene36438	M	.	X	X	X	.	D	gene6962	M	.	.	X	X	U	.	i	0.873	0.281	i	3.077	0.204	i	4.213	2.364	-0.392	-0.624	4.028	1.908	4.42	2.532	0.034	-0.503	3.204	0.647	1.835	0.859
ptp4a3	LS	Both	gene14810	M	.	X	X	.	U	D	gene13057	M	.	X	X	.	U	D	i	1.429	1.132	i	5.023	2.086	i	4.74	2.904	-1.045	-1.323	3.698	3.164	4.743	4.487	0.288	-0.999	5.137	2.073	3.9	2.011
arid4a	LS	Both	gene37367	M	X	X	X	.	U	D	gene35547	M	X	X	X	X	U	D	i	1.81	1.418	i	4.057	1.607	i	4.888	3.069	-1.486	-0.902	4.502	2.853	5.988	3.755	0.176	-1.945	3.528	1.206	2.69	0.814
pdgfra	LS	Both	gene10104	M	.	X	X	X	U	D	gene1515	.	.	.	X	X	U	.	e	0.439	0	i	5.79	0	i	9.943	8.13	-1.159	-1.261	8.326	7.378	9.485	8.638	4.451	0	5.467	1.758	0	0
plk3	LS	Both	gene9015	M	X	X	X	.	D	D	gene48800	M	X	X	X	.	D	.	i	1.994	1.375	i	4.762	2.135	i	5.144	3.331	0.953	1.277	5.099	3.896	4.146	2.619	0.93	0.352	4.507	1.395	2.92	1.306
rpa2	LS	Lon	gene11188	M	.	.	X	X	.	.	gene14050	M	.	.	.	.	.	.	i	0.962	0	e	0	0.255	i	1.803	0	-0.721	0	2.179	0	2.901	0	-0.239	0.219	-0.227	0.049	0.068	0.103
dnmt1	LS	Lon	gene34548	M	X	.	X	.	.	.	gene4753	M	.	.	.	.	.	.	i	1.136	0	i	0.422	0	i	1.802	0	0.185	0	3.729	0	3.544	0	-0.563	0	0.623	0	1.305	0
taf15	LS	Both	gene49283	M	X	.	X	X	.	U	gene40037	M	X	.	X	X	U	U	i	1.395	1.463	i	1.016	0.062	i	4.604	2.819	0.123	-0.936	5.939	3.797	5.816	4.733	-1.267	-1.587	0.312	-1.935	1.958	1.25
psmd8	LS	Lon	gene15430	M	.	.	X	.	.	.	gene6031	M	.	.	.	.	.	.	i	1.226	0	i	1.805	0.738	i	4.213	2.434	0.121	-1.103	4.411	2.367	4.289	3.471	0.233	-0.594	1.129	1.703	1.271	1.278
snip1	LS	Both	gene17803	M	.	.	X	.	U	.	gene19023	M	X	.	X	.	.	.	i	1.077	2.81	i	1.041	0.415	i	4.232	2.456	-0.427	-0.319	4.769	3.621	5.196	3.941	-0.072	0.282	0.578	-0.995	0.777	-0.892
lin9	LS	Lon	gene14101	M	.	.	X	.	.	.	gene18339	M	.	.	.	.	.	.	i	0.867	0	i	1.351	0	i	1.776	0	0.376	0	3.029	0	2.653	0	0.404	0	0.782	0	0.436	0
ventx1.1	LS	Both	gene12073	.	.	X	X	X	.	D	gene43505	.	.	.	X	X	.	.	e	0.367	0	e	6.258	4.091	e	9.815	8.04	0.842	0.323	9.598	8.601	8.756	8.278	3.293	2.454	7.301	3.331	2.532	0
insig1	LS	unk	gene11958	M	.	.	.	.	U	.	gene47935	M	.	X	X	.	D	.	i	1.812	0	i	4.053	3.419	i	6.144	4.372	-3.558	-1.262	1.844	3.838	5.402	5.1	-1.385	0.472	2.935	1.312	2.078	1.351
amd1	LS	Lon	gene924	M	X	X	X	X	.	D	gene4848	M	.	.	.	X	U	.	i	2.053	0.374	i	2.393	2.155	i	3.56	1.789	0.717	-2.056	3.205	2.297	2.488	4.353	1.176	-0.892	1.22	1.981	0.946	2.706
hnrnpk	LS	Both	gene89	M	X	X	X	X	U	D	gene2764	M	X	X	X	X	U	D	i	1.723	1.617	i	5.387	3.816	i	8.483	6.728	-0.777	-0.919	7.549	6.576	8.326	7.495	0.438	-0.35	4.492	3.09	3.858	3.288
cdc25b	LS	Both	gene10443	.	X	X	X	X	D	D	gene48135	M	.	X	X	X	D	D	e	4.837	0	e	8.9	2.815	i	9.652	7.91	0.866	3.969	10.969	9.518	10.104	5.549	3.678	3.459	7.99	2.074	5.395	-0.075
myc	LS	unk	gene4512	M	X	X	X	.	D	.	gene39952	M	.	.	.	.	.	.	i	2.813	3.394	i	3.322	3.039	i	3.978	2.243	2.726	-1.88	4.894	0.489	2.169	2.37	1.969	1.548	1.767	1.434	1.423	0.596
mcm7	LS	Both	gene8157	M	X	X	X	.	U	D	gene20446	M	.	X	X	.	U	.	i	1.943	1.26	i	2.794	2.081	i	5.457	3.737	-1.259	-0.945	4.868	3.601	6.127	4.545	-0.138	-1.431	2.517	2.2	2.675	2.269
dhx15	LS	Both	gene34330	M	X	X	X	X	U	D	gene20464	M	.	.	X	X	U	.	i	1.125	0	i	4.163	1.239	i	6.17	4.45	-0.326	-0.048	6.228	4.894	6.554	4.942	0.358	-0.27	4.554	0.622	2.831	1.051
gtf2a2	LS	Both	gene16038	M	X	.	X	X	U	.	gene3719	M	.	.	X	.	.	.	i	2.225	1.547	i	0.702	0	i	5.052	3.333	-0.168	0.328	5.478	3.899	5.646	3.571	2.823	-0.29	-0.909	-0.064	-2.611	0.616
dhx37	LS	Lon	gene38454	M	.	.	X	.	D	.	gene6603	.	.	.	.	.	.	.	i	0.853	0	i	0	0	i	1.718	0	0.97	0	3.153	0	2.182	0	-0.683	0	-0.832	0	0.597	0
atp1a1	LS	Both	gene14665	M	X	X	X	X	U	D	gene39150	M	X	X	X	X	U	D	i	2.225	2.811	i	5.829	4.175	i	5.861	4.145	-1.216	-1.864	4.663	2.737	5.879	4.601	2.416	2.617	5.502	4.26	3.587	2.14
rasl11b	LS	Both	gene16590	M	.	X	X	.	.	D	gene6164	.	X	X	X	.	.	D	i	3.253	5.253	i	7.52	8.253	i	11.617	9.908	0.569	-0.198	11.231	10.603	10.662	10.801	2.574	1.901	6.51	8.292	5.111	6.621
ptma	LS	Both	gene6497	M	.	X	X	X	U	D	gene5564	M	X	X	X	X	U	D	i	0.903	1.658	i	5.086	4.524	i	7.466	5.761	-0.27	-0.637	7.602	5.682	7.872	6.318	0.964	1.919	4.925	2.804	3.619	1.682
sox17b.1	LS	Both	gene2328	.	.	X	X	X	U	D	gene15871	M	X	X	X	X	U	D	i	0	5.574	e	6.56	5.385	e	8.545	6.843	-0.76	-0.785	7.669	5.978	8.428	6.763	0.537	1.201	5.122	5.106	4.153	2.981
ccnt2	LS	Both	gene18015	M	.	X	X	X	D	D	gene37760	M	.	X	X	X	.	D	i	0.641	0.98	i	2.946	1.418	i	6.786	5.084	0.615	0.133	8.221	5.873	7.606	5.74	0.644	0.115	2.644	0.285	2.179	0.932
calu	LS	Both	gene6188	M	.	.	X	.	U	.	gene47552	M	.	.	X	X	.	.	i	1.808	0.741	i	0.372	0.174	i	5.02	3.323	-0.569	-0.39	6.005	4.041	6.574	4.43	-1.245	0.186	0.902	0.105	1.674	0.306
fam168a	LS	Both	gene37169	M	.	X	X	X	U	D	gene6502	M	X	X	X	X	U	D	i	0.489	1.757	i	5.515	3.553	i	6.15	4.457	-0.15	-0.645	6.277	3.652	6.427	4.296	-0.024	0.816	5.193	3.009	4.231	1.977
snrnp40	LS	Lon	gene16016	M	X	.	X	X	.	.	gene2633	M	.	.	.	X	.	.	i	1.811	0	i	0	1.168	i	2.974	1.286	0.05	-0.208	3.526	3.242	3.476	3.45	-0.516	-2.382	-0.749	0.939	0.026	1.1
prdm10	LS	Lon	gene6338	M	X	.	X	.	D	.	gene7609	M	.	.	.	.	.	.	i	1.241	0	i	0.219	0	i	1.688	0	1.083	0	3.012	0	1.928	0	-0.303	0	-0.089	0	0.53	0
hnrnpab	LS	Both	gene5823	M	X	X	X	X	.	D	gene12761	M	X	X	X	X	U	U	i	1.506	1.98	i	4.732	2.032	i	8.488	6.803	-0.135	-1.174	8.537	6.06	8.672	7.234	-0.295	-1.723	3.628	0.838	3.351	1.875
senp5	LS	Both	gene44234	M	.	.	X	X	.	.	gene19678	M	.	.	X	.	.	.	i	0.933	1.221	i	1.189	0	i	3.44	1.76	-0.259	0.029	3.637	2.158	3.897	2.129	-0.223	-0.789	0.199	-0.754	0.101	0.984
ndufs1	LS	Lon	gene5936	M	.	.	X	.	U	.	gene14640	M	.	.	.	.	.	.	i	0.887	0	e	0	0.151	i	1.674	0	-0.357	0	2.06	0	2.417	0	-0.017	-1.044	-0.24	-0.024	0.054	-0.002
arhgap29	LS	Both	gene13595	M	X	X	X	.	U	D	gene13563	M	.	X	X	.	U	D	i	1.534	0.704	i	6.529	4.567	i	6.561	4.901	-0.911	-0.687	5.42	4.181	6.331	4.867	1.34	1.74	5.874	3.927	3.953	1.588
aplnr	LS	Both	gene3001	.	.	X	X	X	U	D	gene8028	.	.	.	X	X	U	.	e	0	0.367	e	6.698	0	e	10.602	8.944	-1.266	-0.284	7.677	4.544	8.943	4.829	1.694	1.455	6.58	-1.256	4.141	-2.344
ppp4r3b	LS	Both	gene5700	M	X	X	X	X	.	.	gene3932	M	X	.	X	X	U	.	i	1.384	1.249	i	1.561	0.695	i	4.118	2.466	0.467	-0.029	5.037	2.784	4.57	2.813	-0.537	-0.412	1.25	0.483	1.669	0.118
szrd1	LS	unk	gene17521	M	.	.	.	X	.	.	gene17033	M	.	.	X	.	.	.	i	1.128	0	i	3.943	0.786	i	5.155	3.502	-0.828	-0.057	5.344	3.812	6.173	3.87	2.19	1.505	2.634	-1.862	1.091	-2.972
wwtr1	LS	Both	gene8636	M	X	X	X	X	U	D	gene12296	M	X	X	X	X	.	D	i	2.158	2.283	i	6	4.145	i	6.647	4.995	-0.053	-0.738	6.468	4.812	6.521	5.549	2.619	1.01	5.607	3.893	3.017	2.439
maff	LS	Both	gene2910	M	.	X	X	X	D	D	gene11304	M	.	X	X	X	U	D	i	1.432	1.618	i	3.397	3.178	i	5.471	3.826	1.199	-0.433	6.26	4.312	5.061	4.745	0.022	0.579	3.034	2.237	2.092	2.276
c11orf58	LS	Both	gene15353	M	.	.	X	.	.	.	gene14366	M	X	.	X	.	U	.	i	1.804	2.226	i	1.53	0.199	i	4.989	3.344	-0.387	-1.019	4.704	4.034	5.091	5.053	2.053	-0.15	1.726	-1.196	0.489	0.076
ppia	LS	Both	gene36410	M	.	X	X	X	.	D	gene11892	M	.	X	X	.	U	.	i	0.808	1.131	i	4.752	2.751	i	6.33	4.687	0.091	-0.666	8.001	5.321	7.91	5.987	0.654	0.126	4.747	1.577	3.793	2.293
brd1	LS	Both	gene16400	M	.	X	X	X	U	.	gene9314	M	.	X	X	X	.	D	i	0.224	0.757	i	2.786	2.687	i	5.308	3.667	-0.726	-0.102	5.705	4.681	6.43	4.783	-0.126	-0.052	1.569	2.743	2.902	2.204
sinhcaf	LS	Lon	gene18985	M	.	X	X	X	U	D	gene45073	M	.	.	.	.	.	.	i	0.226	2.237	i	1.961	1.572	i	4.838	3.198	-1.595	-0.943	3.361	2.734	4.956	3.677	0.555	-3.836	0.798	0.315	0.811	1.497
ube2d4	LS	Both	gene5536	M	.	X	X	.	.	.	gene5244	M	.	X	X	.	D	D	i	0.812	0.647	i	2.993	2.526	i	3.808	2.175	1.302	1.789	3.666	2.516	2.364	0.727	0.988	2.1	2.263	2.084	1.496	0.387
slc9a3r1	LS	Lon	gene50	M	.	.	X	.	U	.	gene10448	M	.	.	.	.	.	.	i	1.505	0	i	1.061	0	i	1.624	0	-1.885	0	0.772	0	2.657	0	0.879	0	-0.079	0	-0.061	0
m6pr	LS	Lon	gene19147	M	X	.	X	X	.	.	gene42357	M	.	.	.	X	.	.	i	2.681	0	e	0.256	0.113	i	1.622	0	-0.565	0	1.603	0	2.168	0	0.12	-0.535	0.571	0.123	0.706	-0.152
cox7a2	LS	Lon	gene11536	M	.	X	X	.	.	.	gene18434	M	.	.	.	.	D	.	i	0	0.807	i	1.34	0	i	3.533	1.931	-0.42	-0.123	4.207	3.21	4.628	3.333	-0.389	3.48	0.994	-0.67	0.355	-2.75
sub1	LS	Both	gene1803	M	.	X	X	X	.	.	gene13228	M	.	.	X	X	U	.	i	1.224	2.038	i	2.236	0	i	3.685	2.087	-0.84	-1.094	3.771	2.039	4.612	3.133	1.335	0.387	1.203	-1.051	0.855	0.381
acsl3	LS	Both	gene70	M	.	X	X	X	D	D	gene18410	M	X	X	X	X	.	D	i	1.072	0.987	i	4.616	1.239	i	5.096	3.518	1.737	0.255	6.3	4.819	4.563	4.563	2.289	0.379	4.148	0.854	1.846	0.325
max	LS	Both	gene6204	M	.	X	X	X	.	.	gene36036	M	.	.	X	X	.	.	i	0.81	0.224	i	2.949	2.283	i	6.45	4.905	0.435	-0.59	6.458	4.975	6.023	5.565	0.188	-0.229	2.481	1.903	1.827	2.085
phc1	LS	Both	gene19143	M	X	.	X	X	U	.	gene3679	M	.	.	X	X	.	.	i	2.005	1.225	i	1.498	0.852	i	4.141	2.597	-0.919	-0.172	3.495	3.21	4.414	3.382	-0.723	0.605	0.407	-0.548	1.748	0.347
mxi1	LS	Both	gene1080	M	.	X	X	X	U	.	gene10876	M	.	.	X	X	D	U	i	0.368	0	i	5.819	2.681	i	7.965	6.423	-2.212	1.323	8.203	7.222	10.416	5.899	-0.395	2.452	4.34	0.313	4.119	-0.765
cdc42	LS	Both	gene44948	M	X	X	X	X	U	.	gene18173	M	.	X	X	X	U	.	i	2.034	1.351	i	2.75	2.605	i	5.843	4.31	-0.445	0.234	5.806	4.156	6.252	3.921	0.327	2.345	1.189	1.398	1.362	0.366
hap1	LS	Both	gene42459	.	.	X	X	X	.	D	gene47859	.	.	X	X	X	.	D	e	0.488	0	i	7.748	4.406	i	9.082	7.551	0.159	0.16	10.294	9.124	10.136	8.964	3.274	4.469	6.617	6.019	3.856	1.637
itprid2	LS	Both	gene2226	M	.	X	X	.	U	.	gene38498	M	.	X	X	.	U	D	i	0.317	1.04	i	3.116	2.483	i	5.457	3.927	-0.801	-0.573	4.756	3.727	5.557	4.3	-0.391	-0.136	2.199	2.286	2.002	1.641
vgll4l	LS	Both	gene17200	.	X	X	X	X	U	D	gene14806	M	.	X	X	X	U	.	e	5.112	0.632	i	7.614	3.353	i	8.847	7.32	-1.071	-2.289	8.941	6.279	10.012	8.568	1.853	2.595	6.361	3.313	4.998	2.895
kat6a	LS	Both	gene787	M	X	X	X	X	U	D	gene17234	M	X	.	X	X	.	D	i	1.408	2.94	i	2.634	0	i	3.762	2.24	-0.486	-0.557	4.582	2.462	5.068	3.019	0.132	0.627	2.533	0.219	1.993	0.078
fgfr4	LS	Both	gene15271	M	X	X	X	X	D	D	gene10749	M	.	X	X	X	D	D	i	2.325	2.132	i	8.585	5.74	i	8.491	6.971	1.046	0.932	9.124	7.147	8.078	6.215	1.165	2.204	8.738	5.057	6.695	2.746
rbx1	LS	Lon	gene41689	M	.	.	X	X	D	.	gene114	M	.	.	.	.	.	.	i	1.222	0.443	e	0.131	0.378	i	2.453	0.933	-0.31	0.684	3.448	1.89	3.758	1.206	0.77	0.687	0.08	0.318	0.16	0.188
hnrnpul2	LS	Both	gene8193	M	.	X	X	X	U	D	gene5009	M	.	.	X	X	U	.	i	0.547	1.397	i	2.791	0	i	5.575	4.06	-0.483	-0.245	6.328	4.892	6.811	5.137	0.483	-3.837	2.441	-0.333	1.878	-0.368
kbtbd8	LS	Lon	gene13143	M	.	.	X	X	.	.	gene831	M	.	.	.	.	.	.	i	2.133	1.982	i	0.475	0.167	i	2.631	1.121	-0.387	0.492	3.244	0.374	3.631	-0.118	0.876	-0.087	0.176	-0.272	-0.054	-0.371
slc16a1	LS	Lon	gene4309	M	X	.	X	X	.	.	gene338	M	.	.	.	.	.	.	i	1.243	0	e	0	0.108	i	1.5	0	-0.376	0	1.642	0	2.018	0	-0.433	-0.76	0.25	0.695	0.319	0.771
gata2	LS	Both	gene12232	.	X	X	X	X	U	D	gene19445	.	.	X	X	X	U	D	i	3.252	0.811	i	9.421	9.164	i	6.762	5.267	-3.104	-4.043	4.326	2.241	7.43	6.284	1.263	2.633	8.943	8.586	6.565	5.259
cnnm4	LS	Both	gene7820	M	.	X	X	.	U	.	gene10463	M	.	.	X	.	.	.	i	1.287	0.372	i	2.474	0.351	i	4.616	3.121	-0.779	-0.257	4.331	3.245	5.109	3.503	0.492	0.318	1.6	0.748	1.091	0.82
cass4	LS	Both	gene4208	.	.	X	X	X	D	D	gene19988	.	X	X	X	X	U	D	e	0	4.837	i	6.948	5.495	i	9.451	7.957	1.023	0.547	8.506	7.935	7.483	7.388	4.876	5.146	6.105	6.09	0.678	1.637
mcm2	LS	Both	gene6554	M	.	X	X	.	U	.	gene18692	M	X	.	X	.	U	.	i	1.034	2.416	i	1.812	0	i	3.723	2.23	-1.398	-1.068	3.691	2.03	5.09	3.098	-0.057	-0.671	1.344	0.19	1.61	0.358
ttbk1	LS	unk	gene978	M	X	.	X	X	U	.	gene48542	.	.	.	.	.	U	.	i	1.597	6.997	i	0.53	0	i	2.352	0.863	0.291	-1.424	2.555	-0.277	2.264	1.147	0.389	4.595	0.288	-4.238	-0.283	-3.639
sox21	LS	Both	gene16644	.	.	X	X	.	D	D	gene48886	.	.	X	X	.	D	D	i	0	0	e	8.771	6.784	e	9.589	8.11	4.032	3.308	9.739	7.243	5.707	3.935	4.709	1.028	8.098	7.18	3.11	5.113
ier2	LS	unk	gene12740	M	.	X	X	X	.	D	gene11475	M	.	.	.	.	.	.	i	0	0	e	2.311	1.21	e	2.531	1.075	-0.046	-0.194	2.643	1.396	2.689	1.59	0.556	-0.042	1.911	1.11	1.334	1.476
tial1	LS	Both	gene16395	M	X	X	X	.	U	D	gene8087	M	.	X	X	X	U	D	i	1.53	0.447	i	1.798	1.847	i	5.131	3.688	-0.217	-0.222	5.665	4.209	5.881	4.431	-1.861	-1.043	2.336	2.35	1.75	1.739
magoh	LS	Both	gene17117	M	.	.	X	X	U	.	gene45547	M	.	.	X	X	.	.	i	1.035	0.813	i	0	0.203	i	4.781	3.339	-0.874	-0.794	4.69	4.186	5.564	4.979	-0.894	-1.397	-0.802	-1.849	1.203	-0.075
ep300	LS	Both	gene44096	M	X	X	X	X	U	D	gene50487	M	.	X	X	X	U	D	i	1.621	0.406	i	3.799	3.175	i	6.155	4.715	-0.394	-0.35	6.621	4.856	7.015	5.206	-0.223	0.061	3.644	3.125	3.25	2.235
rnf111	LS	Lon	gene41248	M	X	.	X	X	.	.	gene37018	M	.	.	.	X	.	.	i	1.301	0	i	0.551	0	i	1.434	0	0.176	0	3.151	0	2.975	0	-0.319	0	0.48	0	1.273	0
msl1	LS	Both	gene18904	M	X	X	X	X	U	D	gene17977	M	X	X	X	X	.	D	i	2.291	3.393	i	2.485	1.736	i	3.84	2.408	0.146	0.186	3.637	3.447	3.491	3.26	1.646	0.191	2.038	0.982	-0.009	0.41
midn	LS	Both	gene3928	M	.	X	X	X	U	D	gene18239	M	.	X	X	X	U	D	i	0	1.659	i	5.787	4.757	i	8.255	6.827	-0.736	-0.49	8.883	7.438	9.62	7.927	1.148	1.095	4.983	5.049	4.095	3.298
ece1	LS	Lon	gene17301	M	.	.	X	X	U	.	gene16050	M	.	.	.	X	U	.	i	0.226	1.806	i	1.076	0.064	i	3.263	1.835	-1.538	-2.228	3.16	1.392	4.698	3.619	-0.182	-1.036	0.315	0.163	1.014	1.222
tbx2	LS	Both	gene7822	.	.	X	X	X	U	D	gene45099	.	.	X	X	X	U	D	i	0	0	i	8.235	8.349	i	5.876	4.452	-0.425	-1.503	5.85	3.345	6.275	4.848	2.926	3.247	8.411	8.1	5.575	4.866
fhl3	LS	Both	gene13319	.	X	X	X	X	U	.	gene2057	.	X	X	X	X	D	D	i	0	3.252	i	3.481	3.969	i	7.056	5.639	-0.101	1.289	7.251	5.305	7.351	4.016	1.829	6.077	2.817	3.269	0.09	-1.718
sumo1	LS	Both	gene37598	M	.	X	X	.	U	.	gene45822	M	.	X	X	.	.	D	i	1.584	1.073	i	4.07	4.525	i	8.143	6.73	-0.64	-0.539	8.03	6.637	8.67	7.176	-1.267	1.342	4.216	3.95	3.545	2.315
hmgb3	LS	Both	gene10103	M	X	X	X	X	D	D	gene49481	M	.	X	X	X	D	D	i	1.925	1.297	i	4.233	4.053	i	7.705	6.299	2.139	2.057	7.351	6.349	5.212	4.291	2.247	2.756	2.582	3.053	1.472	0.74
fbxo11	LS	Both	gene5708	M	X	X	X	X	D	D	gene17445	M	.	X	X	X	U	D	i	2.81	0.374	i	5.17	3.676	i	7.493	6.09	0.843	-0.272	7.437	6.513	6.594	6.785	1.644	0.456	5.061	3.935	2.987	3.012
ldlr	LS	Both	gene16748	M	X	X	X	.	U	D	gene42388	M	X	X	X	.	U	.	i	2.073	2.228	i	6.665	2.887	i	6.224	4.842	-0.139	-0.839	6.743	4.034	6.882	4.874	1.112	1.901	5.372	1.845	4.411	1.265
glul	LS	Both	gene17632	M	.	X	X	X	U	D	gene15186	M	X	.	X	X	U	.	i	1.587	1.809	i	3.28	1.047	i	3.648	2.272	-1.261	-2.036	3.32	1.807	4.581	3.844	2.877	0.232	2.715	-0.191	0.36	0.665
clns1a	LS	Both	gene1040	M	.	X	X	.	.	D	gene1709	M	.	.	X	.	.	.	i	0	0.962	i	4.444	2.752	i	5.32	3.953	-0.369	-0.692	6.463	5.627	6.832	6.319	-0.975	-1.245	4.228	2.422	2.675	2.674
foxf1	LS	Lon	gene14364	.	.	X	X	X	U	D	gene3222	.	.	.	.	X	U	D	i	0	0	e	8.666	6.397	e	4.272	2.911	-2.625	-4.133	3.83	0.824	6.455	4.957	0.977	2.613	8.395	5.996	7.075	3.902
rbbp4	LS	Both	gene3571	M	.	X	X	.	.	D	gene7333	M	X	.	X	.	U	.	i	1.173	1.81	i	2.13	0.461	i	3.871	2.515	-0.11	-0.101	5.254	3.533	5.364	3.634	0.284	0.124	1.902	0.462	1.647	0.621
capza2	LS	Both	gene15387	M	.	.	X	.	.	.	gene14350	M	.	.	X	.	U	.	i	0.907	0	i	0.843	0.201	i	4.566	3.217	0.071	-0.714	5.422	3.499	5.352	4.213	-0.077	-0.324	0.797	-0.764	0.766	1.086
depdc7	LS	Both	gene7789	M	.	X	X	X	.	D	gene3055	M	.	X	X	.	.	.	i	1.12	1.3	i	2.679	1.42	i	3.572	2.223	-0.177	0.122	4.263	1.694	4.44	1.573	0.65	0.273	3.375	0.155	1.539	0.515
unkl	LS	Both	gene17903	M	X	X	X	.	D	D	gene15570	M	X	X	X	X	D	D	i	1.986	1.072	i	2.404	3.84	i	6.116	4.782	0.209	1.421	7.215	6.129	7.006	4.708	0.994	1.994	0.921	2.719	1.965	1.517
pou3f2	LS	Both	gene18658	.	X	X	X	.	.	.	gene48264	.	X	X	X	.	.	.	e	3.397	1.94	e	2.313	1.031	e	3.013	1.69	-0.436	-0.171	1.923	0.817	2.359	0.987	2.153	1.365	1.282	0.395	0.987	-0.112
hipk1	LS	Both	gene4398	M	X	X	X	X	D	D	gene14597	M	X	X	X	X	U	D	i	1.36	1.133	i	3.558	2.251	i	5.419	4.099	1.4	0.387	6.288	4.512	4.887	4.125	0.439	0.602	3.939	2.112	2.127	0.806
rest	LS	Lon	gene43918	M	X	.	X	X	U	.	gene46185	M	.	.	.	X	U	.	i	1.844	1.296	i	0.228	0	i	2.733	1.423	0.158	-1.084	3.893	1.161	3.736	2.245	0.157	-0.928	-0.038	-0.528	0.533	0.622
peli2	LS	Both	gene10665	M	X	X	X	X	U	.	gene19777	M	.	.	X	X	U	.	i	2.51	1.225	i	2.642	1.738	i	6.297	4.989	-3.138	-2.684	3.497	3.442	6.636	6.126	-0.065	-0.123	1.815	0.527	1.761	1.402
efna1	LS	Both	gene45979	M	.	X	X	X	U	D	gene43718	M	.	X	X	X	U	.	i	1.489	0	i	5.986	4.429	i	6.868	5.573	-1.064	-2.98	6.731	2.964	7.796	5.944	2	2.027	5.109	3.572	3.769	1.9
rnf44	LS	Both	gene50171	M	X	X	X	X	U	.	gene1975	M	X	.	X	X	U	.	i	2.151	1.565	i	2.273	1.012	i	5.386	4.091	-0.545	0.026	5.665	4.752	6.21	4.725	-0.693	-0.487	1.46	0.058	1.915	1.176
epb41l5	LS	Lon	gene19632	M	X	.	X	.	U	.	gene290	M	.	.	.	.	.	.	i	1.511	0	i	0.359	0	i	1.282	0	-0.816	0	2.487	0	3.304	0	0.778	0	0.008	0	-0.062	0
mtss1.2	LS	Both	gene45861	M	.	X	X	X	U	D	gene10249	M	X	X	X	X	U	D	i	0.878	2.073	i	4.076	2.105	i	6.308	5.032	-1.268	-1.061	6.095	4.691	7.363	5.752	-0.416	-0.306	3.039	0.922	2.82	1.537
upk2	LS	Both	gene39954	M	X	.	X	X	D	D	gene1540	.	.	.	X	X	D	.	e	0.995	0	i	2.347	1.795	i	8.375	7.108	0.696	3.371	8.933	7.542	8.237	4.171	3.778	1.457	2.637	1.76	-0.766	0
hes7.2	LS	Both	gene12321	.	X	X	X	X	D	D	gene43959	.	.	X	X	X	D	.	e	5.574	3.253	i	6.059	4.161	i	9.432	8.171	2.191	0.819	11.125	9.974	8.933	9.155	1.826	-0.943	5.219	1.757	3.116	1.637
fam193a	LS	Both	gene13616	M	.	X	X	X	U	D	gene6337	M	.	X	X	X	.	.	i	0.568	0.317	i	3.173	2.543	i	5.619	4.372	-0.335	-0.182	5.977	5.023	6.313	5.205	-0.507	-0.296	2.34	2.473	2.687	2.345
cdr2	LS	Both	gene2539	M	X	X	X	.	.	.	gene43308	M	X	X	X	.	U	D	i	3.811	2.812	i	3.215	1.851	i	5.428	4.199	-0.009	-0.34	6.025	3.909	6.034	4.25	-0.216	-1.472	2.446	2.029	2.899	1.288
mixer	LS	Both	gene15763	.	.	X	X	X	U	D	gene2723	.	.	X	X	X	U	.	i	0	0	e	6.935	4.616	e	12.143	10.916	-0.759	-1.384	11.413	10.234	12.172	11.618	0.866	0.602	6.71	4.559	4.849	2.531
alyref	LS	Both	gene19522	M	X	X	X	X	U	D	gene18345	M	.	.	X	.	U	D	i	2.717	0.675	i	2.322	1.258	i	5.925	4.699	-0.216	-0.641	6.357	5.527	6.573	6.168	-0.917	-0.564	1.88	1.755	1.153	1.448
rpl37	LS	Both	gene8434	M	.	.	X	X	.	.	gene46418	M	.	.	X	X	.	.	i	0	0	i	1.917	0	i	5.637	4.418	-0.608	-0.468	6.413	4.672	7.021	5.139	0.619	0.6	3.117	-3.927	1.08	-1.706
fbxo34	LS	Both	gene4469	M	X	X	X	.	D	D	gene17342	M	.	X	X	.	.	.	i	1.962	0	i	6.913	2.3	i	8.131	6.921	0.889	0.296	9.321	7.476	8.432	7.18	2.597	0.523	6.121	1.71	4.074	1.4
wnt8a	LS	Both	gene11585	.	.	X	X	X	.	D	gene17806	.	.	X	X	X	.	.	i	3.253	0	e	7.87	5.514	e	11.01	9.801	0.245	0.453	10.476	9.24	10.231	8.787	1.398	0	6.559	2.755	4.535	0
lemd3	LS	Both	gene6719	M	.	X	X	.	U	D	gene13211	M	.	X	X	.	U	D	i	0.905	0.989	i	2.443	2.874	i	5.875	4.668	-0.674	-0.454	5.802	5.135	6.476	5.588	0.049	0.094	1.561	2.573	1.643	2.245
vim	LS	Both	gene1965	M	X	X	X	X	D	D	gene3916	M	.	X	X	.	U	D	i	0.368	3.252	i	7.818	7.012	i	8.741	7.536	1.232	-1.451	8.393	6.277	7.161	7.729	3.301	3.797	5.765	5.248	2.534	0
pawr	LS	Both	gene14423	M	.	X	X	.	D	D	gene18681	M	.	X	X	.	U	D	i	1.043	0.811	i	3.366	4.185	i	7.23	6.029	4.409	-1.051	7.01	5.669	2.601	6.72	3.862	1.292	3.472	3.845	-0.911	1.675
hdgf	LS	Both	gene20325	M	.	X	X	X	D	D	gene17603	M	.	X	X	X	.	.	i	1.225	0	i	6.847	2.772	i	9.787	8.586	0.672	0.305	9.916	9.1	9.244	8.795	1.465	0.773	6.455	1.901	4.792	1.506
foxk2	LS	Both	gene4488	M	.	X	X	X	U	D	gene7588	M	X	X	X	X	U	D	i	0.295	1.911	i	3.878	3.189	i	5.439	4.242	-1.018	-1.84	5.557	3.689	6.575	5.529	0.449	-0.366	3.887	2.72	2.604	2.593
e2f7	LS	Both	gene48726	M	.	X	X	.	U	D	gene48864	M	X	X	X	X	U	D	i	0.351	1.605	i	4.384	4.8	i	7.92	6.723	-0.221	-0.58	8.058	7.525	8.278	8.105	0.351	-0.485	3.002	4.852	2.238	4.484
cltc	LS	Both	gene880	M	X	X	X	X	U	D	gene17440	M	X	X	X	X	.	D	i	1.525	2.081	i	4.255	1.783	i	4.265	3.069	-0.028	0.104	4.38	3.803	4.407	3.699	1.28	0.364	4.733	1.713	3.028	1.137
chst2	LS	unk	gene8361	.	.	X	X	X	.	D	gene12450	.	.	.	.	X	U	D	e	1.097	0.227	e	2.945	0.312	e	3.224	2.031	-0.102	-0.988	3.399	-0.151	3.5	0.838	3.067	2.689	2.796	1.075	-0.212	-0.741
ckap5	LS	Both	gene19906	M	.	X	X	X	.	.	gene10478	M	X	X	X	X	U	D	i	1.122	1.151	i	1.312	2.736	i	3.581	2.398	-0.565	-0.212	3.394	2.407	3.959	2.619	0.185	1.314	0.487	1.768	0.639	1.297
flrt3	LS	Both	gene5195	.	.	X	X	X	U	D	gene5136	.	.	X	X	X	U	D	i	0	0	i	7.1	6.386	i	11.68	10.498	-0.505	-0.342	11.359	10.31	11.864	10.652	0.869	0.604	5.453	6.143	3.851	3.115
spdl1	LS	Lon	gene12616	M	X	.	X	.	.	U	gene1599	M	.	.	.	.	.	.	i	2.326	0	i	0.454	0	i	1.179	0	-0.065	0	1.314	0	1.379	0	-2.33	0	-0.952	0	1.017	0
kirrel2	LS	Both	gene2831	.	X	X	X	X	.	D	gene38666	.	.	X	X	X	.	D	i	4.837	0.367	i	8.246	6.44	i	9.784	8.607	-0.148	-0.095	10.691	8.567	10.839	8.661	2.785	1.195	7.077	5.905	5.229	4.126
celsr1	LS	Both	gene38708	.	X	X	X	X	U	D	gene35639	M	X	X	X	X	.	D	i	3.547	0.968	i	6.443	5.498	i	5.914	4.741	0.521	0.164	6.236	5.087	5.715	4.923	1.456	0.995	7.106	5.878	4.308	3.498
alcam	LS	Both	gene17778	.	X	X	X	X	.	D	gene12056	.	.	X	X	X	.	D	e	2.25	0	i	8.235	7.777	i	9.534	8.369	0.043	0.437	10.075	9.054	10.032	8.617	0.447	3.009	7.64	7.111	6.951	4.695
xetrov90011961m	LS	Both	gene48079	.	.	X	X	X	U	.	gene50356	.	.	X	X	X	U	D	e	0.489	1.395	e	0.607	4.129	i	6.916	5.752	-0.57	-0.509	6.682	6.138	7.252	6.647	0.602	2.442	1.462	3.248	1.23	1.088
zhx3	LS	Both	gene4650	M	.	.	X	X	.	.	gene7017	M	.	.	X	.	U	.	i	1.279	1.324	i	1.605	1.179	i	5.312	4.149	0.408	-0.681	6.751	4.38	6.343	5.061	-0.03	-0.244	1.56	0.314	2.041	1.174
marchf8	LS	Both	gene85	M	.	X	X	X	D	D	gene15259	M	.	.	X	X	.	.	i	0	0	i	5.13	0	i	9.784	8.623	1.884	1.326	7.755	4.907	5.871	3.581	1.585	-0.528	4.385	0.153	1.836	0.204
nefl	LS	Both	gene39592	M	.	X	X	.	.	D	gene49650	.	.	.	X	.	.	.	e	0	1.221	i	5.769	2.808	i	7.48	6.329	-0.157	-0.682	6.638	5.935	6.795	6.617	1.249	2.51	5.454	0	4.338	1.637
sp1	LS	Both	gene41989	M	X	X	X	X	U	D	gene3193	M	X	X	X	X	U	D	i	1.547	1.875	i	3.006	1.547	i	6.051	4.902	-0.307	0.043	6.589	5.666	6.895	5.623	-0.023	0.041	2.619	1.936	2.415	1.652
wsb1	LS	Both	gene15952	M	.	.	X	X	U	.	gene15574	M	X	.	X	X	U	.	i	1.072	1.475	i	2.101	0.342	i	3.775	2.628	-0.66	-0.474	4.504	3.096	5.165	3.57	-0.009	0.701	2.323	1.314	2.082	0.76
inka1	LS	Both	gene1741	M	.	X	X	X	.	D	gene7052	.	.	X	X	X	.	D	e	0	3.252	i	6.607	6.419	i	9.149	8.003	-0.182	-1.069	9.003	6.469	9.185	7.538	3.836	3.857	6.083	5.084	2.534	2.534
lfng	LS	Both	gene20081	M	.	X	X	X	D	D	gene8485	M	X	X	X	X	.	D	e	0.136	1.446	i	6.826	6.303	i	8.033	6.891	0.611	-0.104	8.782	6.699	8.171	6.802	3.57	4.347	5.967	5.669	3.097	1.634
actn4	LS	Both	gene14393	M	X	X	X	X	U	D	gene11677	M	.	X	X	.	U	D	i	1.617	0.45	i	4.368	2.998	i	5.818	4.676	-2.132	-0.374	5.539	4.124	7.671	4.499	-0.031	-0.009	4.039	2.91	3.137	1.29
suds3	LS	Both	gene42438	M	.	X	X	.	D	D	gene44892	M	.	.	X	.	U	D	i	0.074	0.363	i	3.921	1.284	i	3.223	2.083	0.843	-0.865	3.719	2.65	2.875	3.515	1.711	-0.999	3.938	1.832	1.722	1.298
ppm1a	LS	Lon	gene1445	M	X	.	X	X	.	D	gene46702	M	.	.	.	.	.	.	i	1.378	0	i	0	0	i	1.134	0	0.237	0	1.632	0	1.395	0	1.218	0	0.452	0	-0.859	0
btg1	LS	Both	gene9403	M	.	X	X	X	U	D	gene2452	M	.	X	X	X	.	D	i	0.809	0.486	i	3.778	3.63	i	7.146	6.014	-0.708	0.27	7.82	5.633	8.528	5.363	2.927	1.583	3.43	3.284	0.829	1.415
usp4	LS	Both	gene6932	M	.	.	X	X	.	.	gene13757	M	X	.	X	X	.	.	i	0.527	1.113	i	0.6	0.322	i	3.737	2.607	0.249	0.372	5.104	3.901	4.855	3.529	-0.328	0.144	0.984	0.086	2.109	0.315
gadd45g	LS	Both	gene36266	.	.	X	X	X	.	D	gene49	.	.	X	X	X	.	D	i	4.251	3.253	e	10.743	9.777	e	9.871	8.743	-0.01	0.092	10.154	8.859	10.164	8.767	1.296	1.87	10.417	8.938	9.378	7.5
utp15	LS	Both	gene132	M	.	.	X	X	.	.	gene12153	M	.	.	X	X	U	.	i	0.11	0.954	i	2.118	1.464	i	4.768	3.64	-0.308	-0.358	5.554	4.295	5.863	4.653	-2.718	-0.208	0.642	1.077	2.417	1.841
rpa1	LS	Both	gene10223	M	.	.	X	.	U	U	gene48550	M	.	.	X	.	U	.	i	0	0.963	i	1.075	0.559	i	4.554	3.432	-0.855	-1.351	5.029	2.902	5.884	4.253	-1.914	-0.221	0.75	-0.418	2.111	0.863
rfx5	LS	Lon	gene46014	M	.	.	X	X	U	.	gene46883	M	.	.	.	.	.	.	i	1.813	0.233	i	0.805	0	i	2.147	1.027	-1.656	-0.456	1.159	1.076	2.814	1.532	0.954	-2.22	-0.029	-0.323	-0.133	-0.529
csde1	LS	Both	gene16932	M	.	X	X	X	U	D	gene18464	M	X	.	X	X	U	.	i	0.7	1.01	i	1.047	0	i	4.033	2.916	-2.101	-1.418	2.931	2.672	5.032	4.09	-1.357	-0.598	1.678	0.045	1.504	0.908
lpar2	LS	Both	gene8985	.	.	X	X	X	.	D	gene12643	M	.	X	X	X	U	D	i	0	0.81	i	6.485	5.214	i	8.603	7.489	0.119	-2.751	9.389	4.475	9.271	7.226	1.01	-0.201	6.077	5.078	4.688	4.369
stk17a	LS	Both	gene946	M	X	X	X	.	U	D	gene725	M	.	X	X	.	U	.	i	2.098	0	i	3.665	3.052	i	5.337	4.224	-1.341	-1.843	4.324	2.318	5.665	4.161	-0.007	-0.84	2.794	0.327	1.976	1.233
rbm47	LS	Both	gene14735	M	.	.	X	X	.	.	gene2731	.	.	.	X	X	.	.	i	0	0	e	0.801	0.792	e	2.027	0.926	0.555	0.486	2.583	1.96	2.028	1.473	0.682	0.844	-0.117	-1.066	0.288	-0.817
ppm1g	LS	Lon	gene10028	M	.	.	X	X	U	.	gene9079	M	.	.	.	X	.	.	i	1.59	1.573	i	0.826	0	i	2.808	1.724	-1.067	-0.259	3.064	2.326	4.132	2.586	-0.928	-0.694	-0.078	-1.676	0.522	-0.026
foxd4l1.1	LS	Both	gene1342	.	.	X	X	X	D	.	gene10515	.	.	X	X	X	D	D	i	0	0	e	5.892	6.717	e	9.461	8.381	5.219	4.097	10.426	8.288	5.207	4.191	1.021	1.434	5.649	6.667	3.114	3.86
sbds	LS	unk	gene7334	M	.	.	.	.	.	.	gene3080	M	.	.	X	.	.	.	e	0.122	0.468	i	0.631	0.105	i	3.688	2.61	-0.248	-0.552	4.402	2.744	4.649	3.296	-2.297	-1.306	0.882	-1.543	1.973	1.544
nme4	LS	unk	gene46705	M	.	.	X	X	U	U	gene2556	M	.	.	.	X	.	.	i	1.073	0	i	1.458	0.339	i	4.96	3.9	-0.936	-1.092	4.441	3.047	5.378	4.139	-2.211	0.004	1.311	-2.505	2.64	0.448
snrpe	LS	unk	gene35804	M	.	.	.	X	.	.	gene11444	M	.	.	X	X	.	.	i	1.072	1.13	i	0.889	1.025	i	3.676	2.618	-0.626	0.15	4.558	3.923	5.185	3.773	0.413	-0.983	0.306	0	2.071	0.944
paip2b	LS	Both	gene2554	M	.	X	X	X	U	.	gene13491	M	.	X	X	X	U	.	i	0.809	0.81	i	3.3	2.855	i	6.038	4.983	-1.266	-2.931	5.54	2.517	6.806	5.449	-1.317	-1.392	2.062	1.685	2.803	1.573
phactr4	LS	Both	gene6528	M	.	X	X	X	U	D	gene733	M	X	X	X	X	U	D	i	0.615	1.431	i	3.478	2.314	i	4.31	3.26	-1.808	-1.45	5.013	2.676	6.821	4.127	0.452	-0.377	3.651	2.327	2.747	1.608
sema6d	LS	Both	gene1797	M	X	X	X	X	D	D	gene39060	M	X	X	X	X	D	D	i	1.326	1.263	i	4.243	2.241	i	7.887	6.843	3.044	2.587	8.02	6.902	4.976	4.316	1.997	2.022	3.325	1.92	1.207	0.87
fam110c	LS	Lon	gene11135	M	X	X	X	.	.	.	gene16208	M	.	.	.	X	.	.	e	0.681	0.81	e	1.155	0.767	e	1.497	0.454	0.543	0.251	1.697	0.192	1.155	-0.059	0.676	1.11	0.218	0.233	0.868	0.055
akirin1	LS	Lon	gene2545	M	.	.	X	X	.	.	gene17527	M	.	.	.	X	.	.	i	2.132	0.884	i	0.911	1.313	i	2.844	1.809	1.197	1.022	3.491	3.298	2.294	2.276	1.015	-0.102	0.539	0	0.681	0.935
rhoa	LS	Both	gene12113	M	X	X	X	X	U	D	gene7349	M	.	.	X	X	U	.	i	2.488	1.547	i	2.456	1.942	i	5.869	4.841	-0.697	-0.899	6.337	4.866	7.034	5.765	-0.982	-0.055	3.265	1.205	1.672	0.752
bmpr1a	LS	Both	gene1511	M	.	X	X	.	D	D	gene16516	M	X	X	X	.	D	D	i	0.64	1.279	i	3.792	3.056	i	7.983	6.956	1.287	1.008	8.376	7.652	7.089	6.644	1.26	0.497	3.429	2.581	2.339	1.849
luc7l	LS	Both	gene7735	M	.	.	X	X	.	.	gene4902	M	.	.	X	X	.	.	e	0	0.091	i	1.37	0	i	4.816	3.791	0.108	-0.37	6.3	4.018	6.192	4.388	-1.527	-1.389	1.643	-0.259	2.542	0.838
ankrd37	LS	unk	gene38188	M	.	.	.	X	U	.	gene45616	M	.	X	X	X	U	.	i	2.81	0	i	0	3.076	i	6.198	5.192	-2.791	0.986	0	3.503	3.633	2.517	1.471	-2.836	5.068	0.872	0	1.088
rps12	LS	Both	gene34753	M	.	.	X	X	.	.	gene3507	M	.	.	X	X	.	.	i	3.808	1.157	i	1.507	0	i	3.872	2.87	-0.408	-0.469	3.101	3.09	3.509	3.559	-0.115	-0.754	1.825	0.782	0.096	0.904
ttc5	LS	unk	gene10054	M	.	.	.	.	.	.	gene36278	M	.	X	X	.	D	D	i	0	0	i	3.13	2.8	i	4.274	3.273	0.107	0.483	4.151	4.135	4.044	3.652	1.447	-0.183	2.125	2.811	1.41	2.803
rpl31	LS	Both	gene44147	M	.	.	X	X	.	.	gene10829	M	.	.	X	X	.	.	i	3.395	0.348	i	0.643	0	i	4.545	3.545	-0.154	-0.565	4.786	3.415	4.94	3.98	1.922	-0.276	0.904	-1.422	-0.908	0.226
ascl1	LS	Both	gene36163	M	.	X	X	.	.	D	gene46246	M	.	X	X	.	.	D	i	0	3.395	i	4.233	2.85	i	5.864	4.876	0.082	-0.206	5.152	3.991	5.071	4.197	1.499	1.6	2.735	1.653	1.637	0.669
cfl1	LS	Both	gene39251	M	X	X	X	.	U	D	gene15554	M	.	X	X	X	U	.	i	2.11	0.81	i	4.684	2.966	i	6.256	5.271	-2.208	-2.263	5.179	4.045	7.387	6.308	-0.69	-1.837	4.451	2.109	3.624	2.774
golph3	LS	Both	gene7325	M	.	X	X	X	U	.	gene19186	M	.	X	X	.	.	.	i	0	1.392	i	4.732	4.243	i	7.281	6.309	-1.504	-0.743	6.859	6.462	8.362	7.206	-2.095	0.365	4.402	4.316	4.788	2.91
racgap1	LS	Both	gene5806	M	X	.	X	X	U	.	gene18423	M	X	.	X	X	.	.	i	1.335	1.42	i	0	0.652	i	3.471	2.502	-0.117	0.579	4.852	3.519	4.968	2.94	-0.588	0.089	1.144	-0.558	1.004	1.058
mtf2	LS	Both	gene18034	M	X	.	X	X	.	.	gene39079	M	X	.	X	X	U	.	i	1.672	1.056	i	0.756	0.452	i	2.951	1.982	0.281	-0.738	4.093	2.634	3.812	3.373	0.056	-0.595	0.756	0.241	1.078	0.605
kdm5c	LS	Lon	gene40675	M	X	.	X	X	U	.	gene20226	M	.	.	.	X	.	D	i	1.706	1.705	i	1.108	1.769	i	1.971	1.018	-0.523	-0.686	2.941	1.759	3.464	2.444	-0.093	2.206	1.225	1.01	1.423	0.117
u2af1	LS	Both	gene11371	M	.	.	X	X	.	.	gene8732	M	.	.	X	X	.	.	i	2.226	1.022	i	1.391	0.45	i	5.009	4.08	-0.387	-0.429	4.917	4.4	5.304	4.829	3.46	0.669	-0.688	0.226	-1.766	0.482
spag9	LS	Both	gene44055	M	.	X	X	.	U	D	gene16494	M	X	X	X	X	U	.	i	0.894	0	i	3.642	2.703	i	5.485	4.569	-1.242	-2.029	4.17	2.635	5.412	4.664	0.562	0.498	3.005	2.03	2.027	1.125
dedd	LS	Both	gene17366	M	X	.	X	.	.	.	gene1301	M	.	.	X	X	.	.	i	0.81	0	i	1.47	1.017	i	4.196	3.293	-0.41	-0.24	4.057	3.38	4.466	3.621	-0.202	1.615	0.321	0.088	0.091	-1.141
lifr	LS	Both	gene13851	M	.	X	X	X	.	D	gene16192	M	.	X	X	X	U	D	i	0.811	1.279	i	5.245	4.923	i	7.431	6.535	-0.1	-0.539	5.528	6.411	5.628	6.95	1.525	0.367	4.492	4.696	1.671	3.925
rpl34	LS	Both	gene7812	M	.	.	X	X	.	.	gene10238	M	.	.	X	X	.	U	i	0.49	0	i	2.372	0.371	i	5.027	4.141	0.11	-0.396	5.909	5.039	5.799	5.435	-1.825	-3.152	1.328	0.307	1.08	0.816
thap1	LS	Son	gene1440	M	.	.	.	.	.	.	gene19546	M	.	.	X	.	.	.	i	1.393	1.227	i	1.151	0.697	i	3.054	2.172	-0.489	-0.651	4.25	3.086	4.739	3.737	-1.557	3.172	1.543	1.579	1.669	0.266
g3bp2	LS	Both	gene4173	M	X	.	X	X	U	.	gene5196	M	.	.	X	.	.	.	i	1.394	1.122	i	0	0	i	2.831	1.951	-0.295	-0.563	3.502	2.62	3.797	3.184	-0.385	-1.501	-1.445	0.078	0.022	0.474
tfap2a	LS	Both	gene18675	.	X	X	X	X	D	D	gene7348	.	X	X	X	X	D	D	i	4.838	5.837	i	7.582	7.555	i	8.891	8.013	4.811	3.896	8.778	8.122	3.967	4.226	2.663	4.667	7.791	7.722	4.278	2.229
pcbp3	LS	Both	gene39138	M	X	X	X	X	U	.	gene16451	M	X	X	X	X	.	D	i	1.433	1.384	i	2.701	1.993	i	5.045	4.168	0.327	0.325	6.016	4.87	5.689	4.545	-0.13	0.183	2.313	1.483	2.371	1.206
zfand6	LS	Both	gene10684	M	X	.	X	.	U	.	gene17651	M	.	.	X	.	.	.	i	2.247	0	i	0.745	0	i	3.776	2.902	-0.812	0.108	3.706	3.883	4.518	3.774	-0.593	-0.978	0.688	2.041	0.77	1.403
ankrd11	LS	Both	gene10961	M	X	X	X	X	.	D	gene8317	M	X	X	X	X	D	D	i	1.469	0.911	i	4.211	2.155	i	4.711	3.839	0.266	1.285	5.266	5.214	5	3.928	0.132	1.764	4.414	2.202	3.125	1.214
snrpd3	LS	Both	gene8994	M	.	.	X	.	U	U	gene5896	M	.	.	X	.	U	.	i	1.434	0.225	i	0	0	i	4.931	4.063	-0.181	-0.241	5.773	4.522	5.954	4.763	-3.249	-1.203	-0.198	-1.772	1.624	-0.186
rprd1b	LS	Both	gene4523	M	.	.	X	X	.	.	gene15878	M	.	.	X	X	D	.	e	0	0.211	i	1.569	0	i	5.373	4.513	-0.281	0.919	5.382	4.961	5.663	4.042	-0.721	-0.507	0.316	-1.419	0.836	0.474
smap2	LS	Both	gene11238	M	.	.	X	X	.	.	gene18744	M	.	.	X	.	.	.	i	0.976	1.251	i	0.87	0.069	i	3.539	2.68	0.388	0.066	4.815	3.625	4.427	3.559	-1.312	-0.524	-0.153	-1.453	1.008	0.595
bmi1	LS	unk	gene16629	M	.	.	.	X	.	D	gene17976	M	.	X	X	.	.	D	i	3.252	1.224	i	4.482	2.447	i	3.561	2.706	-0.213	-0.428	2.879	2.376	3.093	2.805	1.064	0.368	4.405	2.843	2.904	2.104
p4hb	LS	Both	gene14541	M	X	X	X	X	U	D	gene20072	M	.	X	X	X	U	.	i	1.811	1.073	i	2.082	2.888	i	3.728	2.874	-0.593	-1.19	3.679	2.441	4.272	3.631	0.04	0.398	1.734	2.181	1.861	1.979
fkbp1a	LS	Both	gene40292	M	.	.	X	X	.	.	gene12269	M	.	.	X	X	.	.	i	1.228	1.812	i	2.004	1.352	i	4.824	3.97	-0.584	-0.969	5.119	3.84	5.702	4.809	0.186	-1.088	0.573	-0.269	0.76	2.206
fam83d	LS	Lon	gene42926	M	.	.	X	X	.	.	gene2658	M	.	.	.	X	.	.	i	1.807	0.806	i	0.056	2.001	i	3.397	2.545	-0.23	-2.032	4.509	1.545	4.739	3.578	0.967	3.777	1.712	-1.69	0.588	-2.767
rdh10	LS	Both	gene2949	M	.	X	X	X	.	D	gene2258	M	X	X	X	.	.	D	i	1.325	2.225	i	6.624	4.911	i	7.714	6.863	0.039	0.227	7.75	6.878	7.71	6.651	3.508	1.097	4.86	4.575	2.043	2.59
fubp3	LS	Both	gene7944	M	.	.	X	X	U	.	gene2662	M	.	X	X	X	U	.	i	0.225	0.406	i	0.776	1.703	i	5.637	4.789	-2.08	-1.111	4.932	4.366	7.012	5.476	0.408	-0.451	2.056	1.052	1.499	1.289
dynll2	LS	Son	gene36168	M	.	.	.	.	.	.	gene40289	M	.	.	X	.	.	.	i	2.392	0.328	i	2.722	0.339	i	4.031	3.189	-0.589	-0.551	5.087	3.124	5.675	3.675	-1.542	-0.882	3.115	0.657	3.233	0.434
eif2s2	LS	Both	gene6509	M	.	.	X	X	U	.	gene18347	M	.	.	X	X	U	.	i	1.588	0	i	1	1.107	i	5.193	4.355	-0.733	-1.574	5.245	3.828	5.978	5.402	-0.982	0.336	-0.167	0.042	1.451	0.086
gid4	LS	Both	gene14185	M	.	X	X	X	.	.	gene11786	M	.	.	X	.	.	.	i	0.811	0	i	2.407	0.967	i	5.117	4.28	-0.226	0.537	4.975	4.994	5.201	4.457	-1.168	0.4	0.83	0.326	1.636	1.879
rbm24	LS	Both	gene9726	M	.	X	X	X	.	D	gene13381	M	.	X	X	.	.	D	i	1.812	0.617	i	6.371	3.917	i	5.082	4.253	-0.023	0.485	5.323	5.106	5.346	4.621	2.027	2.084	6.473	3.504	3.516	1.182
srrm1	LS	Both	gene5422	M	.	X	X	X	U	.	gene48485	M	X	X	X	X	U	D	i	0.838	1.439	i	1.466	1.057	i	3.942	3.113	-1.714	-0.656	4.013	3.483	5.727	4.139	0.278	0	0.854	1.507	1.175	1.17
myod1	LS	unk	gene16778	M	X	X	X	X	U	.	gene8594	.	.	.	.	X	U	.	e	1.986	0	e	1.385	6.087	i	6.861	6.034	-3.212	-3.798	5.811	4.999	9.023	8.797	1.762	2.344	0.308	4.766	-0.192	3.109
gab1	LS	Both	gene35026	M	X	X	X	.	U	D	gene15202	M	X	X	X	X	U	.	i	1.609	1.726	i	4.25	2.477	i	3.888	3.062	0.237	-0.816	4.413	2.95	4.175	3.766	1.911	-0.38	4.308	0.876	1.823	0.592
ddx47	LS	Both	gene14760	M	.	.	X	X	.	.	gene4257	M	.	.	X	.	.	.	i	0.98	0.481	i	1.725	0.815	i	4.425	3.6	0.325	-0.192	4.875	4.362	4.551	4.554	-0.245	0.311	1.701	1.639	1.946	1.52
epcam	LS	Both	gene18928	M	.	X	X	X	U	D	gene8648	M	X	X	X	X	U	D	i	0.226	3.432	i	3.75	3.35	i	6.193	5.372	-1.153	-0.843	6.442	5.845	7.595	6.688	-0.162	0.589	5.114	3.358	2.81	2.418
tubb4b	LS	Lon	gene5617	M	.	X	X	.	U	.	gene13019	M	.	.	.	.	U	.	i	4.251	0.475	i	2.361	2.938	i	2.645	1.825	-2.085	-3.346	1.539	1.503	3.624	4.849	0.338	0.878	1.218	1.582	0.864	1.289
ptbp1	LS	Both	gene13906	M	.	X	X	X	U	D	gene7463	M	.	X	X	X	U	D	i	0.26	0.81	i	2.586	3.299	i	5.806	4.988	-1.402	-0.545	5.242	5.481	6.645	6.026	-0.497	-0.202	2.016	2.671	1.915	2.297
krt7	LS	unk	gene3584	.	.	X	X	X	U	D	gene9991	.	.	.	.	X	U	D	e	0.81	0	i	7.347	5.009	i	7.787	6.969	-1.35	-1.833	9.565	7.749	10.915	9.582	1.742	5.374	8.732	6.279	5.999	0
ccng1	LS	Both	gene14278	.	.	.	X	X	U	.	gene8018	M	.	.	X	X	U	.	i	0	0	i	0	1.364	i	10.231	9.415	-1.471	-1.434	5.741	5.131	7.212	6.564	0	3.976	-1.136	0.319	-0.774	0.198
vps4b	LS	Both	gene10464	M	X	.	X	.	U	U	gene7670	M	.	.	X	.	U	.	i	1.662	1.046	i	0.336	0.905	i	3.638	2.823	-0.169	-0.246	4.62	4.837	4.789	5.084	-2.139	-1.398	1.377	1.224	2.42	1.903
atxn2l	LS	Both	gene35359	M	.	X	X	X	.	.	gene18842	M	.	.	X	X	U	.	i	0.587	1.682	i	1.98	1.017	i	3.653	2.84	-0.587	-0.535	3.874	3.02	4.462	3.555	0.717	0.216	1.313	0.928	1.271	1.136
ahdc1	LS	Both	gene42451	M	.	X	X	X	U	D	gene50366	M	.	X	X	X	U	D	i	1.463	0.936	i	3.993	3.098	i	5.451	4.64	-0.609	-0.857	4.44	3.32	5.049	4.177	0.319	0.614	3.602	3.104	2.768	1.774
cct6a	LS	Both	gene11901	M	.	.	X	X	.	.	gene10320	M	.	.	X	X	.	.	i	0	0.463	i	1.066	0.253	i	3.552	2.755	0.053	0.405	4.319	4.18	4.266	3.774	-0.073	-0.379	1.3	-0.266	1.76	1.172
ccnf	LS	Both	gene5622	M	X	X	X	X	U	D	gene47132	M	X	X	X	X	U	D	i	2.81	2.718	i	3.399	3.728	i	5.011	4.228	-0.342	-0.84	5.781	4.941	6.123	5.781	0.481	2.276	3.055	2.777	2.753	1.821
atad2	LS	Both	gene2062	M	.	.	X	.	.	.	gene36365	M	X	.	X	.	U	.	i	0.978	2.165	i	0.723	0	i	3.382	2.601	-0.418	-0.25	4.479	3.443	4.897	3.693	-0.863	-0.03	1.457	-0.151	2.143	0.218
mcm4	LS	Both	gene3021	M	.	.	X	.	.	.	gene14315	M	X	.	X	.	U	.	i	0.001	1.704	i	1.661	0.232	i	4.281	3.511	0.047	-0.297	5.496	4.395	5.449	4.692	-0.298	1.02	1.432	0.902	1.409	0.089
chrm4	LS	Both	gene2872	.	.	X	X	.	U	D	gene3433	.	X	X	X	.	U	D	i	0	2.394	i	5.597	6.678	i	7.138	6.376	-0.836	-2.385	5.715	6.114	6.551	8.499	2.728	0.811	4.638	7.11	2.091	5.058
nuak1	LS	Both	gene47975	.	.	X	X	X	U	D	gene16850	M	.	X	X	X	U	D	e	1.81	0.091	i	9.978	7.056	i	7.806	7.053	-0.49	-1.023	7.585	5.784	8.075	6.807	0.8	2.065	9.981	6.686	7.938	3.879
rpl18	LS	unk	gene44625	M	.	.	X	.	.	U	gene34820	M	.	.	.	X	.	.	i	1.075	0	i	0.957	0	i	4.293	3.539	-0.539	0.277	4.394	3.883	4.933	3.606	1.193	-0.835	0.637	-0.987	0.676	0.798
slc35a2	LS	Both	gene4562	M	.	X	X	X	.	.	gene37752	M	.	.	X	X	U	.	i	3.253	3.253	i	4.791	3.199	i	7.152	6.401	0.29	-0.696	7.368	6.576	7.078	7.273	-0.594	-1.39	1.754	3.64	4.328	3.085
sox9	LS	Both	gene4277	M	.	X	X	X	.	D	gene20103	.	X	X	X	X	.	D	i	0	4.836	i	7.324	5.872	i	6.811	6.064	-0.502	-0.615	5.279	4.35	5.781	4.966	3.964	5.419	3.743	3.872	1.637	0.092
eif1ax	LS	Both	gene40360	M	X	.	X	X	.	.	gene43469	M	X	.	X	.	.	.	i	1.808	3.268	i	1.563	0.854	i	4.378	3.631	-0.204	-0.771	5.184	4.033	5.389	4.803	0.605	-3.092	0.664	0.312	0.217	1.47
ctr9	LS	Lon	gene18099	M	.	.	X	X	.	.	gene16221	M	.	.	.	X	.	.	i	1.28	0.395	i	0.051	0	i	2.348	1.603	-0.136	0.434	2.316	2.318	2.453	1.884	0.099	-0.138	-1.508	-1.007	0.205	-0.917
ctsb	LS	Both	gene2902	M	.	X	X	X	U	D	gene15301	M	.	.	X	X	D	.	i	0.452	0	i	3.772	1.231	i	5.933	5.202	-1.086	1.14	5.676	6.472	6.762	5.332	-0.14	-0.855	3.271	1.982	2.417	2.192
pak2	LS	Both	gene13056	M	.	.	X	.	U	.	gene17561	M	X	X	X	.	.	D	i	0.396	1.81	i	0.813	1.83	i	4.827	4.106	-0.845	0.186	5.85	4.81	6.694	4.624	-0.024	-0.115	1.455	1.561	2.082	1.106
rhebl1	LS	Both	gene6083	M	X	X	X	X	D	D	gene46500	M	X	X	X	X	D	D	i	3.132	2.81	i	6.102	2.85	i	6.068	5.349	1.286	1.091	7.676	6.012	6.39	4.921	2.653	2.632	5.081	2.155	2.898	-0.102
gabpa	LS	Both	gene12876	M	.	.	X	X	U	.	gene14306	M	.	.	X	.	.	.	i	0.549	0.074	i	0.292	0.497	i	4.709	3.998	-1.43	-0.482	4.012	4.279	5.442	4.761	-0.522	-0.403	-0.538	0.64	0.958	1.091
stx6	LS	Both	gene39804	M	.	.	X	X	U	.	gene46761	M	.	.	X	X	U	.	i	0.811	1.64	i	0.736	0.784	i	4.754	4.044	-0.746	-0.167	5.083	4.419	5.829	4.586	1.183	0.602	0.314	-0.691	-0.496	-0.585
ppp1r10	LS	Both	gene15337	M	X	X	X	.	.	D	gene6553	M	.	X	X	X	.	D	i	1.547	0.348	i	3.064	2.166	i	4.472	3.762	0.527	0.039	4.545	4.273	4.018	4.234	0.421	0.214	1.466	1.241	1.264	1.583
chtop	LS	Both	gene14451	M	.	.	X	X	U	.	gene49964	M	.	.	X	X	U	.	e	0.183	0.455	i	0.5	0.551	i	3.785	3.079	-0.255	-1.09	3.736	2.975	3.991	4.065	0.328	1.514	0.716	0.96	0.77	0.609
h2az1	LS	Both	gene10681	M	.	X	X	X	U	D	gene13112	M	.	X	X	X	U	D	i	1.395	0.741	i	4.967	4.261	i	7.837	7.138	-1.439	-0.917	7.346	7.021	8.785	7.938	0.048	0.048	4.502	3.416	4.153	2.621
cep152	LS	Both	gene5743	M	.	X	X	X	D	D	gene47475	M	X	X	X	.	D	.	i	0.052	1.769	e	0.678	0.85	i	2.628	1.932	0.813	1.451	3.983	3.586	3.17	2.134	-0.001	0.03	0.801	0.668	0.872	0.929
rpl38	LS	Lon	gene34994	M	.	.	X	X	.	.	gene996	M	.	.	.	X	.	.	i	0.323	0.81	i	0.528	0	i	3.217	2.526	-0.273	0.37	4.356	4.554	4.629	4.185	-0.39	-1.565	-0.105	-0.415	1.197	0.942
ivns1abp	LS	Both	gene8164	M	X	X	X	.	U	.	gene2682	M	.	.	X	.	U	.	i	1.769	0.396	i	1.189	0.567	i	2.996	2.309	-0.334	-0.292	3.428	2.737	3.763	3.029	-0.23	-0.98	1.279	0.252	-0.139	0.673
snrpf	LS	Lon	gene17124	M	.	.	X	X	U	.	gene13859	M	.	.	.	X	.	.	i	1.4	0.483	i	0.324	0	i	2.999	2.316	-1.3	-1.013	2.918	2.524	4.218	3.536	0.799	0.847	0.04	-0.259	0.31	-0.185
ppp4r2	LS	Both	gene14994	M	.	X	X	.	.	D	gene19865	M	.	X	X	X	U	.	i	0	0.531	i	4.278	1.722	i	4.559	3.877	-0.162	-0.721	5.405	4.525	5.567	5.246	-0.389	-0.756	4.168	2.035	2.666	2.124
cdca5	LS	Both	gene10494	M	.	.	X	X	.	.	gene8510	M	.	.	X	X	.	.	i	0.075	0	i	1.062	0.747	i	5.522	4.856	-0.545	-0.553	5.536	4.537	6.081	5.09	-1.116	-1.202	-1.272	-0.678	1.817	0.9
impa2	LS	Both	gene14741	M	.	X	X	.	U	D	gene9131	M	.	X	X	X	U	D	i	1.659	0.395	i	4.452	2.768	i	6.181	5.523	-1.832	-1.415	4.097	2.428	5.928	3.843	1.154	-0.055	3.396	2.401	1.62	1.015
poldip3	LS	Both	gene10900	M	.	X	X	.	U	D	gene11044	M	.	X	X	X	U	.	i	0.695	0.35	i	2.021	2.864	i	5.546	4.897	-0.152	-0.075	6.186	5.43	6.338	5.504	0.299	-0.158	1.771	2.496	1.714	2.27
man2a1	LS	Both	gene45265	M	X	X	X	.	U	D	gene1542	M	.	X	X	.	U	D	i	1.15	0.754	i	4.556	4.715	i	4.972	4.333	0.082	-0.294	5.398	4.192	5.316	4.486	0.006	1.349	4.442	3.716	3.6	2.009
adnp	LS	Both	gene13391	M	X	.	X	X	D	.	gene4002	M	.	.	X	X	.	.	i	2.166	1.395	i	0.157	1.52	i	4.976	4.345	1.683	0.359	5.989	4.873	4.306	4.514	-0.152	0.6	0.669	0.153	1.785	0.259
itgb1	LS	Both	gene2507	M	.	X	X	X	U	D	gene45181	M	X	X	X	X	U	D	i	0.63	2.547	i	3.025	2.12	i	5.577	4.946	-0.975	-1.005	5.357	5.011	6.332	6.016	-0.942	0.024	2.701	1.608	2.393	1.156
zbed4	LS	Both	gene16743	M	.	.	X	X	.	.	gene13165	M	.	.	X	X	.	.	e	0.12	0.214	i	1.205	0	i	3.222	2.595	-0.456	-0.321	4.689	3.522	5.145	3.843	-0.975	0.142	0.603	-0.431	0.511	-0.199
vegt	LS	Both	gene35915	M	.	.	X	X	U	.	gene2660	M	.	.	X	X	U	.	i	1.657	0.225	i	1.591	0.244	i	5.421	4.796	-0.26	0.007	5.293	4.812	5.552	4.805	0.662	-0.616	1.22	-1.858	1.417	0.043
riok3	LS	Both	gene36938	M	X	X	X	.	.	.	gene9663	M	.	.	X	.	.	.	i	2.12	0.806	i	2.48	0.52	i	6.627	6.003	-0.471	-0.722	4.563	2.535	5.034	3.257	-0.963	2.6	2.77	0.644	2.476	-1.733
luc7l3	LS	Both	gene7114	M	.	X	X	X	U	D	gene9334	M	X	.	X	X	U	.	i	0.488	1.745	i	4.078	0.698	i	5.153	4.53	-0.887	-0.988	5.522	4.294	6.409	5.283	1.229	-0.078	4.596	-0.04	3.121	0.982
med14	LS	Both	gene44562	M	.	X	X	X	U	D	gene38203	M	.	.	X	X	U	.	i	1.056	0.191	i	2.39	1.396	i	4.538	3.925	-0.552	-0.52	4.947	4.418	5.499	4.938	-1.055	-1.132	2.55	1.172	2.504	1.834
rps4x	LS	Both	gene50915	M	.	.	X	X	U	.	gene4350	M	.	.	X	X	.	.	i	0.393	0	i	0.158	0.559	i	4.907	4.297	0.077	0.04	5.17	4.784	5.094	4.745	1.046	-0.717	1.128	0.729	0.552	-0.18
creb1	LS	Both	gene8610	M	.	X	X	.	D	.	gene15839	M	.	.	X	X	U	.	i	0	0.892	i	2.785	1.704	i	6.871	6.264	0.739	0.045	6.846	6.699	6.107	6.654	1.131	0.425	0.988	1.224	0.936	1.185
hmgn1	LS	Both	gene1566	M	.	X	X	X	U	D	gene2148	M	X	X	X	X	.	D	i	0.81	1.962	i	4.342	3.658	i	7.823	7.215	-0.358	-0.115	8.212	7.527	8.57	7.641	-0.141	0.042	3.412	3.294	3.452	2.935
mex3b	LS	Both	gene9910	M	.	X	X	X	D	D	gene3268	M	X	X	X	X	D	D	i	3.253	4.253	i	5.763	4.607	i	8.901	8.3	1.067	0.928	9.237	7.06	8.17	6.132	1.63	2.499	4.484	2.704	3.548	1.673
smarcc1	LS	Both	gene14782	M	X	X	X	X	U	D	gene1154	M	.	X	X	X	U	D	i	2.074	0.769	i	3.269	3.859	i	5.814	5.22	-0.675	-0.635	5.617	5.033	6.292	5.668	-0.068	-0.228	3.609	3.741	2.78	2.957
cnot6l	LS	Both	gene16982	M	X	X	X	X	U	.	gene44419	M	X	X	X	X	U	D	i	1.164	1.303	i	1.52	3.039	i	5.826	5.236	-0.484	-0.786	5.19	3.891	5.674	4.677	-0.863	0.658	1.618	2.168	1.86	0.982
naca	LS	Both	gene10708	M	.	.	X	X	.	.	gene44255	M	.	.	X	X	.	D	i	0.641	0.963	i	1.128	1.439	i	4.319	3.734	0.415	0.238	4.633	4.775	4.218	4.537	0.022	0.247	0.555	2.406	0.797	0.257
snrpa1	LS	Both	gene36401	M	X	.	X	X	U	.	gene838	M	X	.	X	X	U	.	i	0.289	2.471	i	1.044	0.78	i	4.021	3.437	-0.877	-1.683	3.656	3.805	4.533	5.488	0.007	-1.387	0.339	1.194	0.561	1.496
rprd2	LS	Both	gene1471	M	.	X	X	X	U	D	gene45185	M	X	X	X	X	.	.	i	0.56	1.952	i	2.294	1.863	i	3.734	3.15	0.106	-0.028	4.915	3.469	4.81	3.497	-0.318	0.019	2.023	1.766	1.275	1.257
coro1c	LS	Both	gene39325	M	X	X	X	.	.	D	gene7552	M	.	X	X	.	U	D	i	1.061	0.581	i	2.23	2.62	i	4.564	3.983	-0.022	-1.004	4.829	4.343	4.852	5.347	-0.032	0.749	2.367	2.455	1.783	1.872
btf3l4	LS	Both	gene17177	M	X	.	X	.	.	U	gene11599	M	X	.	X	X	.	U	i	1.413	1.643	e	0.194	0.249	i	2.445	1.865	-0.254	0.226	2.909	2.926	3.163	2.7	-0.364	-0.177	0.222	0.396	0.316	0.243
cdca7	LS	Both	gene1475	M	.	X	X	.	U	U	gene8238	M	X	.	X	.	.	.	i	1.136	2.137	i	1.686	1.915	i	4.384	3.809	-0.996	-0.461	4.598	4.575	5.594	5.036	-1.04	-1.904	1.136	2.434	0.917	2.595
sall4	LS	Both	gene11114	M	X	.	X	.	D	.	gene49536	M	X	.	X	X	D	.	i	2.926	1.811	i	0.013	0.764	i	5.741	5.176	5.439	3.659	6.125	5.67	0.686	2.011	1.782	0.948	-0.792	0.551	-0.81	0.159
rps17	LS	Lon	gene43880	M	.	.	X	X	U	.	gene45041	M	.	.	.	X	.	.	i	1.002	1.81	i	0	1.103	i	3.481	2.921	0.1	0.743	4.1	3.847	4	3.104	-1.543	0.169	-0.788	0.631	0.64	0.095
slc30a1	LS	Both	gene8063	M	.	X	X	X	U	D	gene4056	M	.	X	X	X	U	D	i	0	0.226	i	5.104	3.475	i	6.787	6.232	-0.419	-0.383	6.671	6.192	7.09	6.575	0.261	0.66	4.867	3.023	3.639	2.53
atf4	LS	Both	gene18245	M	.	X	X	X	U	D	gene18950	M	.	X	X	X	U	.	i	2.809	4.251	i	6.946	6.586	i	8.334	7.781	-0.683	-0.542	9.065	7.951	9.748	8.493	1.825	1.321	6.145	4.329	5.112	4.524
hat1	LS	Both	gene10162	M	X	X	X	X	.	.	gene17899	M	.	.	X	X	.	.	i	1.502	0.225	i	2.518	1.359	i	5.104	4.553	0.064	-0.02	5.814	5.1	5.75	5.12	-0.158	-2.055	2.529	1.579	2.38	2.015
gorasp2	LS	Both	gene3005	M	.	.	X	X	.	.	gene19375	M	.	.	X	X	.	.	i	1.306	1.487	i	1.45	0.066	i	3.368	2.818	0.15	-0.262	4.751	3.793	4.601	4.055	-0.561	-0.524	0.76	-0.153	1.243	0.086
tfap4	LS	Both	gene45094	M	.	X	X	.	U	.	gene46232	M	.	X	X	X	U	D	i	0.527	0.935	i	2.911	2.385	i	7.148	6.603	-1.774	-0.97	6.255	6.192	8.029	7.162	-0.516	0.218	1.9	1.942	2.791	0.894
znf652	LS	Both	gene10559	M	.	.	X	X	.	.	gene4697	M	.	.	X	X	U	.	i	0	0.696	e	0	0.05	i	4.025	3.483	-0.543	-1.545	3.965	2.783	4.507	4.327	0.259	0.379	0.028	-0.198	-0.165	-0.326
pias4	LS	Both	gene3060	M	.	.	X	X	.	.	gene2306	M	X	.	X	X	U	.	i	1.224	1.209	i	0	0.352	i	3.3	2.762	-0.347	-0.899	3.581	2.316	3.928	3.215	-0.974	-0.725	0.088	0.737	0.445	1.012
prpf6	LS	Both	gene16280	M	.	.	X	.	.	.	gene8693	M	.	.	X	X	.	.	i	3.023	0.961	i	0	0	i	3.228	2.692	0.032	-0.315	3.897	4.052	3.866	4.368	-3.391	-1.394	-1.688	-0.43	0.087	0.755
txlna	LS	Both	gene10739	M	X	.	X	.	U	.	gene9977	M	.	.	X	X	.	D	i	2.022	1.249	i	0.046	0.981	i	2.364	1.851	-1.006	-0.057	3.634	3.063	4.64	3.12	-0.563	0.178	-0.613	1.012	0.648	1.87
phf13	LS	Both	gene15375	M	X	X	X	.	.	D	gene13731	M	X	X	X	.	U	D	i	1.487	1.048	i	4.966	3.545	i	5.976	5.463	-0.351	-0.58	5.92	5.197	6.271	5.777	1.602	0.635	4.506	3.972	3.108	2.52
slbp	LS	Both	gene6668	M	.	X	X	X	D	D	gene2845	M	.	X	X	.	.	D	i	0.809	0.904	i	4.549	6.165	i	7.248	6.742	0.653	-0.073	8.152	7.345	7.498	7.418	-0.312	0.636	4.125	6.018	3.389	4.598
rpl30	LS	Both	gene2409	M	.	.	X	X	.	D	gene17147	M	.	X	X	X	.	D	i	0.003	0	i	0.628	2.402	i	5.362	4.858	-0.155	-0.356	5.653	5.102	5.808	5.458	-1.025	0.6	2.961	2.801	2.403	1.228
kansl2	LS	Both	gene18208	M	X	.	X	X	U	.	gene41761	M	.	.	X	X	U	.	i	1.641	0	i	0.893	0.434	i	4.322	3.82	-0.584	-0.544	4.81	4.065	5.394	4.609	-0.488	-1.264	1.146	-0.789	1.537	1.047
vkorc1l1	LS	Both	gene48845	M	X	X	X	X	U	.	gene47957	M	.	X	X	X	.	.	i	2.284	0.351	i	2.374	2.616	i	4.233	3.733	-0.445	-0.581	4.821	4.396	5.266	4.977	0.085	0.295	2.118	2.791	1.678	2.156
rpl7a	LS	Both	gene18372	M	.	.	X	.	.	U	gene5419	M	.	.	X	X	.	.	i	1.809	1.399	i	0	0.232	i	2.476	1.977	-0.044	-0.358	2.407	2.075	2.451	2.433	1.122	1.139	-0.354	-0.381	-0.859	-1.12
nodal	LS	Both	gene38431	.	.	.	X	.	U	.	gene46672	.	.	.	X	.	U	.	i	0	0	i	3.519	3.786	i	8.986	8.49	-0.319	-0.118	9.073	9.214	9.392	9.332	2.46	-0.943	3.128	0	-0.766	1.637
rreb1	LS	Both	gene48166	M	.	X	X	X	U	D	gene1847	M	X	X	X	X	.	D	i	0.658	1.157	i	5.511	4.899	i	5.076	4.582	-0.462	0.099	4.808	4.274	5.27	4.175	2.795	2.617	5.169	4.771	2.602	2.32
cdkn1a	LS	Both	gene3147	M	.	X	X	.	U	.	gene11957	.	.	X	X	.	U	D	i	0	3.253	i	1.884	6.313	i	8.306	7.814	-1.117	-0.81	4.615	5.712	5.732	6.522	3.271	3.705	0.099	6.333	-1.92	1.68
susd6	LS	Both	gene9871	M	.	X	X	X	U	.	gene36217	M	.	.	X	X	U	.	i	0.226	1.81	i	1.942	2.067	i	5.829	5.338	-0.592	-0.269	5.544	5.347	6.136	5.616	-1.097	0.277	1.204	2.132	0.977	1.414
acsl4	LS	Both	gene17661	M	X	X	X	X	U	D	gene18528	M	.	X	X	.	.	D	i	1.645	1.311	i	3.657	3.415	i	4.434	3.952	-0.101	-0.402	5	3.657	5.101	4.059	1.451	0.314	2.596	2.453	1.18	1.337
lmbr1l	LS	Both	gene42660	M	.	X	X	.	.	D	gene45341	M	.	X	X	X	.	D	i	1.004	1.49	i	3.596	2.78	i	3.758	3.28	0.47	-0.217	4.122	3.205	3.652	3.422	1.477	1.075	3.359	1.786	1.761	1.007
gatad2a	LS	Both	gene1547	M	X	X	X	X	U	D	gene36827	M	X	X	X	X	D	D	i	1.355	1.262	i	3.466	2.63	i	4.92	4.448	0.016	0.92	5.696	5.806	5.68	4.886	1.698	0.761	3.091	2.804	1.212	1.736
tbx1	LS	Both	gene20443	.	.	X	X	X	U	D	gene1166	.	.	X	X	X	.	D	e	0.486	3.253	i	10.084	10.286	i	7.63	7.158	-1.344	-0.935	7.114	6.984	8.457	7.919	2.518	0.957	9.452	10.177	7.499	8.76
efnb2	LS	Both	gene4314	.	.	X	X	X	U	D	gene35876	.	.	X	X	X	.	D	i	3.395	3.81	i	9.759	8.759	i	9.216	8.745	-0.988	-0.355	8.105	7.731	9.093	8.086	3.088	3.586	9.241	8.552	5.633	3.902
sesn1	LS	Both	gene4492	M	.	.	X	.	U	.	gene39303	M	.	X	X	.	D	.	i	1.52	1.589	i	1.36	1.401	i	5.647	5.189	-1.127	-0.46	2.33	2.047	3.457	2.507	0.166	-0.203	1.127	0.081	1.549	-0.277
lmo4.1	LS	Both	gene18156	M	X	X	X	X	U	D	gene10372	M	X	X	X	X	D	D	i	2.605	2.496	i	1.847	3.316	i	2.106	1.664	-1.025	1.842	1.266	2.836	2.291	0.995	2.051	3.166	2.005	3.035	0.042	0.023
jpt1	LS	unk	gene14489	M	.	.	.	.	U	.	gene5306	M	X	X	X	.	U	D	i	0.964	2.913	i	4.185	2.98	i	3.521	3.079	-1.239	-1.431	4.146	4.389	5.385	5.82	0.25	0.993	3.676	2.812	4.367	1.708
rnf40	LS	Both	gene7868	M	.	.	X	X	U	.	gene10862	M	X	.	X	X	.	.	i	1.073	2.729	i	1.287	0.915	i	4.397	3.956	-0.219	-0.05	4.623	3.856	4.842	3.906	0.69	1.08	1.402	0.312	1.089	0.891
pnhd	LS	Both	gene6168	.	.	X	X	X	D	.	gene9156	.	.	X	X	X	D	.	i	0	0	e	7.787	4.807	e	9.483	9.044	1.306	3.26	9.711	9.392	8.405	6.133	0.156	-1.386	6.159	4.575	5.438	3.521
cxadr	LS	Both	gene48522	M	.	X	X	X	U	D	gene4706	M	.	.	X	.	U	.	i	1.35	1.66	i	2.97	1.83	i	4.979	4.548	-0.391	-0.468	5.631	4.877	6.022	5.345	-0.9	-0.848	2.965	1.7	3.593	0.539
egln3	LS	Both	gene16603	M	.	X	X	X	U	.	gene5803	M	.	.	X	X	U	.	e	0.327	0	i	6.62	3.779	i	7.448	7.019	-1.648	-1.46	6.172	6.667	7.82	8.126	1.6	1.927	5.941	4.325	3.84	2.536
add1	LS	Both	gene6346	M	.	X	X	.	U	D	gene45784	M	X	X	X	X	.	.	i	0.343	1.64	i	3.943	2.381	i	4.477	4.053	-2.475	-0.464	2.014	3.4	4.489	3.864	0.745	0.672	3.729	1.822	1.712	1.234
csrnp1	LS	Both	gene15716	M	.	X	X	X	U	D	gene11113	M	X	X	X	X	U	D	i	0.548	2.002	i	4.988	3.127	i	3.545	3.138	-2.413	-1.476	2.487	2.3	4.9	3.776	1.193	0.976	4.466	2.668	3.257	1.047
rsbn1l	LS	Both	gene38201	M	.	X	X	.	U	.	gene41044	M	X	X	X	.	.	.	i	1.26	2.479	i	2.663	2.173	i	3.719	3.313	-0.902	0.283	3.838	3.846	4.74	3.563	1.156	-0.81	1.945	1.446	1.45	1.504
gsk3a	LS	Both	gene6032	M	X	X	X	X	U	D	gene15761	M	.	X	X	X	U	D	i	2.325	1.132	i	2.794	3.284	i	5.872	5.47	-0.892	-1.708	5.336	4.862	6.228	6.57	0.823	0.831	2.202	3.035	1.646	1.635
rrp15	LS	Both	gene50165	M	X	X	X	X	U	D	gene14487	M	X	X	X	X	U	D	i	2.063	1.694	i	1.203	1.423	i	4.201	3.8	-0.094	-0.428	4.362	4.143	4.456	4.571	-0.285	-0.019	0.914	1.556	0.975	0.875
sfrp2	LS	Both	gene49054	.	.	X	X	X	D	D	gene7346	M	X	X	X	X	D	D	i	3.253	4.252	i	8.885	8.685	i	9.784	9.387	2.112	2.697	10.235	7.896	8.123	5.199	2.965	3.635	8.071	8.082	5.525	4.001
ssbp3	LS	Both	gene2655	M	X	X	X	X	U	D	gene8248	M	.	X	X	X	.	D	i	2.158	0.651	i	4.792	4.874	i	7.265	6.872	-0.102	-0.169	7.851	7.195	7.952	7.364	0.057	0.175	5.269	5.07	4.086	4.002
med13	LS	Both	gene2542	M	.	X	X	X	U	D	gene44986	M	X	X	X	X	U	D	i	0.694	1.325	i	3.982	2.584	i	4.986	4.593	-0.256	-0.742	5.549	4.421	5.805	5.164	0.455	0.051	3.883	2.368	2.928	2.155
set	LS	Both	gene45893	M	.	.	X	X	.	.	gene7528	M	.	X	X	X	U	D	i	3.252	1.28	i	3.753	2.623	i	6.212	5.82	-0.528	-0.423	7.466	5.945	7.994	6.368	-0.736	0.345	4.074	2.54	3.864	2.033
srsf10	LS	Both	gene158	M	.	.	X	X	U	.	gene9912	M	.	.	X	X	U	D	e	0.164	0.289	i	0.241	0.747	i	4.953	4.562	-0.391	-0.23	5.829	5.412	6.219	5.641	0.06	-0.57	1.125	0.474	0.756	0.814
hunk	LS	Both	gene12223	.	X	X	X	X	D	D	gene46460	.	.	X	X	X	.	D	e	4.132	0.367	i	6.386	8.37	i	9.581	9.191	0.709	0.402	10.15	9.879	9.44	9.477	5.36	5.909	5.272	8.003	1.088	2.411
bcl2l12	LS	Both	gene1586	M	.	X	X	X	D	.	gene39304	M	.	X	X	X	D	.	i	1.109	0	i	2.208	2.909	i	5.047	4.666	2.862	2.544	6.439	5.239	3.577	2.694	1.215	3.268	1.845	1.319	0.553	-0.322
ddi2	LS	Both	gene46812	M	.	X	X	.	U	.	gene48946	M	.	.	X	X	.	.	i	1.396	2.397	i	3.805	3.246	i	5.132	4.752	-0.358	0.089	5.298	5.139	5.656	5.05	0.601	-0.38	2.317	1.625	2.226	1.067
srsf2	LS	Both	gene8572	M	.	X	X	X	D	D	gene1639	M	X	X	X	X	U	D	i	0.935	2.032	i	4.152	4.613	i	7.169	6.793	0.621	-0.637	6.724	6.669	6.103	7.306	1.224	0.381	3.649	3.466	2.044	3.294
cdk2ap1	LS	Lon	gene8367	M	.	.	X	.	U	.	gene16958	M	.	.	.	X	D	.	i	1.636	1.809	i	1.178	1.145	i	2.816	2.441	0.747	1.187	2.947	4.413	2.2	3.227	0.702	0.194	0.776	3.37	0.562	2.078
fbxo33	LS	unk	gene20085	M	.	X	X	.	U	.	gene2158	M	.	.	.	.	.	.	i	0.225	0.357	i	2.972	0	i	4.5	4.126	-0.141	-0.769	5.469	3.896	5.61	4.665	-0.168	-0.395	2.729	1.917	2.101	2.398
syn1	LS	Both	gene20052	.	X	X	X	.	U	D	gene9260	.	.	X	X	X	U	.	i	3.325	2.809	i	4.682	2.931	i	5.452	5.087	-1.685	-2.995	5.183	3.516	6.867	6.511	1.409	2.706	3.857	2.558	2.86	1.788
id3	LS	Both	gene6843	.	.	X	X	X	U	D	gene12621	.	.	X	X	X	U	D	e	1.81	0	e	9.26	9.049	e	10.441	10.079	-1.295	-1.639	10.921	10.138	12.216	11.777	0.275	0.555	9.489	9.536	8.293	8.09
trim28	LS	Both	gene6587	M	.	.	X	X	U	.	gene42177	M	.	.	X	X	D	.	i	0.363	0.807	i	0.652	0.919	i	2.933	2.572	-1.101	0.808	3.643	4.18	4.745	3.372	-0.391	-0.525	0.517	-0.211	0.727	1.02
pgrmc2	LS	Both	gene13002	M	.	X	X	.	.	.	gene41850	M	.	X	X	X	.	.	i	0.806	0.227	i	5.403	4.649	i	7.631	7.271	-0.661	-0.775	8.392	7.718	9.054	8.493	1.225	-3.646	3.336	3.755	4.349	4.34
glg1	LS	Both	gene51029	M	X	X	X	X	U	.	gene40546	M	X	X	X	.	.	.	i	1.284	1.981	i	1.55	1.643	i	5.708	5.352	-0.146	-0.096	5.498	5.559	5.644	5.655	-0.416	-1.601	0.907	1.594	1.515	2.185
rad21	LS	Both	gene3973	M	X	X	X	X	U	D	gene9201	M	.	.	X	X	U	.	i	1.64	0.351	i	2.729	1.186	i	6.472	6.119	-1.013	-0.845	6.406	6.283	7.42	7.128	-1.492	-2.108	2.218	1.674	1.846	1.638
ncbp1	LS	Both	gene9675	M	X	.	X	.	U	.	gene1226	M	.	.	X	X	D	.	i	1.583	0.916	e	0	0.038	i	2.86	2.51	0.004	0.623	3.883	3.769	3.879	3.146	-0.157	-0.372	-0.127	0.279	-0.036	0.385
ccnl2	LS	Both	gene40330	M	X	X	X	X	U	D	gene2850	M	.	.	X	.	U	.	i	1.446	1.006	i	2.167	1.305	i	4.32	3.986	0.147	0.105	5.058	5.174	4.911	5.069	-0.018	0.095	1.601	0.9	1.767	0.823
pnn	LS	Both	gene5554	M	.	.	X	X	U	.	gene48860	M	.	X	X	X	U	.	e	0.282	0.057	i	1.544	2.726	i	6.386	6.057	-0.312	-0.319	6.91	6.49	7.222	6.809	-0.396	0.192	0.898	1.993	2.092	2.346
ski	LS	Both	gene37491	M	X	X	X	X	U	D	gene40873	M	X	X	X	X	U	D	i	1.319	2.285	i	5.721	5.563	i	6.409	6.081	-0.128	-0.325	5.943	5.21	6.071	5.535	0.717	0.918	5.783	5.287	3.774	3.38
tmed7	LS	unk	gene4840	M	.	.	.	X	.	.	gene1410	M	X	.	X	.	.	.	i	0.218	3.1	i	0.174	0.709	i	2.939	2.615	-0.386	0.096	3.241	4.505	3.628	4.409	-1.618	-0.021	-1.477	0.76	1.087	0.959
stau1	LS	Both	gene10879	M	.	.	X	X	.	.	gene20	M	X	.	X	X	U	.	i	0	1.931	i	2.494	0.345	i	4.013	3.689	-0.993	-2.275	3.793	2.184	4.786	4.459	-1.97	1.458	0.9	-0.262	1.659	0.844
ptp4a2	LS	Both	gene11268	M	X	.	X	X	U	.	gene2076	M	.	.	X	.	U	.	i	2.252	0	i	0	1.248	i	3.786	3.469	-0.485	-0.699	4.242	3.966	4.727	4.665	-0.439	0.663	0.024	0.591	0.759	0.988
pim3	LS	Both	gene19517	M	.	X	X	.	.	D	gene20098	M	.	X	X	.	.	.	i	1.487	1.129	i	2.472	3.313	i	5.334	5.02	0.608	0.047	4.966	5.091	4.358	5.044	1.167	0.55	1.898	1.952	1.733	2.526
foxa4	LS	Both	gene16247	.	.	X	X	X	.	.	gene14309	.	.	X	X	X	.	.	i	0	0	e	5.625	5.258	e	11.543	11.229	0.313	0.518	11.338	10.495	11.024	9.977	-0.136	1.461	4.076	1.755	3.856	0
hs3st3a1	LS	Both	gene20154	.	.	X	X	X	.	D	gene2272	.	.	X	X	.	.	D	i	3.252	1.809	i	7.819	8.405	i	7.682	7.37	0.363	-0.851	6.973	6.026	6.61	6.877	2.397	2.02	6.85	7.764	3.998	4.849
anxa7	LS	Both	gene19590	M	.	X	X	X	D	D	gene6617	M	.	X	X	X	.	D	i	0.148	0	i	2.446	4.48	i	6.296	5.988	0.623	0.227	6.779	7.001	6.156	6.774	0.259	0.625	2.447	3.863	1.676	3.678
endod1	LS	Both	gene46391	M	.	X	X	X	.	D	gene3223	M	.	X	X	X	.	.	i	0.366	0	i	7.764	4.811	i	8.085	7.787	-0.226	-0.025	7.784	6.82	8.011	6.845	3.544	3.461	6.457	4.083	4.342	0
jarid2	LS	Both	gene5227	M	X	X	X	X	U	D	gene3868	M	X	X	X	X	D	.	i	1.583	1.162	i	2.12	1.882	i	4.093	3.795	-0.115	0.665	3.789	3.63	3.904	2.965	0.277	1.006	0.935	0.488	1.512	0.541
ythdf1	LS	Both	gene7750	M	.	X	X	X	U	D	gene34981	M	.	X	X	X	.	D	i	1.002	1.072	i	3.471	2.99	i	6.178	5.881	-0.118	0.166	6.987	6.916	7.105	6.75	0.557	0.779	3.206	3.01	2.672	1.995
nedd9	LS	Both	gene3791	.	.	X	X	X	D	D	gene13536	.	.	X	X	.	D	D	e	0	1.81	i	7.83	6.984	i	9.033	8.743	8.602	7.211	10.357	10.141	1.755	2.93	9.275	8.901	6.778	6.565	-0.767	-1.804
tpd52	LS	Both	gene39996	M	.	X	X	X	.	D	gene46795	M	.	X	X	X	.	D	i	0	0.81	i	8.56	5.814	i	6.929	6.642	-1.023	0.203	5.603	5.678	6.626	5.475	2.207	1.448	8.439	5.933	6.296	3.922
hp1bp3	LS	unk	gene10170	M	.	.	.	X	.	.	gene9653	M	.	.	X	X	.	.	i	4.838	1.55	i	0	1.694	i	4.246	3.96	-1.231	-0.952	3.032	3.009	4.263	3.961	1.581	0.461	0.819	-0.166	-0.206	1.149
smndc1	LS	Lon	gene1025	M	.	.	X	X	U	.	gene12794	M	.	.	.	.	.	.	e	0.07	1.306	i	1.36	3.512	i	3.748	3.468	-1.145	-0.473	3.535	3.926	4.68	4.4	-0.159	0.455	1.401	4.635	1.388	3.404
prpf38b	LS	Both	gene11816	M	X	.	X	X	.	.	gene45879	M	.	.	X	X	.	.	i	2.429	0.691	i	0.666	0.363	i	3.569	3.29	-0.29	-0.328	4.229	4.29	4.518	4.619	-0.33	0.508	0.698	-0.153	2.083	0.641
colgalt1	LS	Both	gene6450	M	.	X	X	.	.	D	gene16490	M	.	.	X	.	U	.	i	0.227	0.483	i	3.327	0.35	i	4.664	4.385	-0.011	-1.511	3.59	4.505	3.601	6.016	2.299	-0.13	2.335	0.741	0.392	-0.166
bcl7a	LS	Both	gene3924	M	X	.	X	X	U	.	gene8328	M	.	X	X	.	D	.	i	1.81	1.077	i	1.21	1.433	i	4.076	3.801	0.333	1.099	4.645	5.088	4.312	3.989	-0.151	-0.32	0.068	0.533	0.841	1.164
sf3b4	LS	Both	gene6199	M	.	.	X	X	U	.	gene18594	M	.	.	X	X	.	.	i	0.069	1.55	i	0.93	0.959	i	5.488	5.217	-0.375	-0.751	5.618	5.106	5.992	5.856	-1.899	0.575	0.313	1.306	3.179	1.103
dck.1	LS	Both	gene8312	M	X	X	X	.	.	D	gene6019	M	.	X	X	.	U	D	i	2.327	0.808	i	3.632	2.693	i	3.784	3.515	0.663	-1.195	4.421	2.451	3.757	3.646	1.961	2.118	3.734	1.685	2.013	1.342
msl3	LS	Both	gene7231	M	.	.	X	X	.	U	gene3720	M	.	.	X	.	.	.	e	0.283	0.003	e	0.451	0	i	3.566	3.297	-0.491	0.253	4.077	3.949	4.568	3.695	-0.347	0.295	0.574	1.838	0.705	0.183
bmp2	LS	Both	gene3881	M	.	.	X	.	.	.	gene6864	M	.	X	X	.	U	D	i	0	1.397	i	0.37	4.033	i	6.233	5.966	-0.612	-0.955	5.497	4.92	6.11	5.875	-1.408	0.347	0.314	3.068	2.103	2.16
tjap1	LS	Both	gene6869	M	.	.	X	X	U	.	gene45338	M	.	.	X	X	U	.	i	0.887	0.168	i	1.22	1.165	i	2.539	2.276	-1.042	-1.578	2.194	1.386	3.236	2.964	0.503	0.785	-0.196	0.257	0.717	0.503
dazap2	LS	unk	gene5548	M	.	.	.	X	U	.	gene14686	M	X	.	X	X	.	.	e	0.163	0.772	i	2.434	0	i	4.58	4.317	-1.25	0.537	4.169	5.445	5.419	4.908	0.612	-1.715	1.881	-0.167	1.813	-0.394
rbm5	LS	Both	gene8463	M	X	X	X	X	U	D	gene6311	M	X	X	X	X	U	D	i	1.74	1.568	i	3.423	2.909	i	5.773	5.511	-0.212	-1.897	6.038	4.33	6.25	6.227	0.654	-0.504	3.423	2.915	1.993	1.49
evx1	LS	unk	gene37585	.	.	X	X	X	.	D	gene41194	.	.	.	.	X	U	.	i	0	0	e	6.406	5.87	e	5.358	5.096	-1.619	-1.188	5.267	5.357	6.886	6.545	0.968	0.998	6.822	4.581	5.233	3.11
nop16	LS	Son	gene1296	M	.	.	.	X	.	.	gene13574	M	.	.	X	.	.	.	i	0	1.544	i	0	1.825	i	3.865	3.605	-0.359	-0.978	5.744	4.205	6.103	5.182	0	1.482	0	1.757	0	0.679
eomes	LS	Both	gene15630	.	.	X	X	X	U	D	gene9150	.	.	X	X	X	D	D	e	3.253	1.81	e	10.464	7.125	e	11.401	11.148	-0.06	0.802	10.882	10.957	10.942	10.155	1.168	1.831	10.094	6.075	8.273	4.705
plk2	LS	Both	gene9232	.	.	X	X	X	U	.	gene4666	M	.	.	X	.	U	.	i	3.253	4.25	e	6.209	0.514	i	9.173	8.928	-2.949	-2.192	4.407	4.599	7.356	6.791	0.973	-2.542	5.019	0.392	4.027	1.029
csnk1a1	LS	Both	gene763	M	.	X	X	X	U	D	gene45503	M	.	X	X	X	U	D	i	0.422	1.132	i	3.667	4.096	i	6.252	6.008	-1.99	-1.246	5.438	5.666	7.429	6.912	-1.026	0.472	3.437	4.021	3.269	3.001
gmeb1	LS	Both	gene6347	M	.	.	X	.	.	.	gene3282	M	.	.	X	.	.	.	i	0	0	i	1.952	1.196	i	4.766	4.527	-0.421	0.472	5.407	5.087	5.828	4.615	0.619	-1.85	2.792	1.454	1.886	1.22
cldn5	LS	Both	gene12434	.	.	X	X	.	U	D	gene15103	.	X	X	X	.	U	D	e	0.369	4.838	e	8.038	7.031	e	7.985	7.746	-1.355	-1.722	6.387	5.842	7.742	7.564	4.651	1.857	6.083	6.721	2.538	5.007
lef1	LS	unk	gene41430	.	.	X	X	X	.	D	gene34407	.	.	.	.	X	.	.	e	3.252	0	e	5.059	5.654	e	5.462	5.226	0.404	0.324	4.757	5.85	4.352	5.526	1.154	-1.406	4.105	5.828	1.109	3.537
eif3b	LS	Both	gene17008	M	.	.	X	.	U	.	gene14685	M	.	.	X	X	.	.	i	1.099	0	e	0.183	0.264	i	3.209	2.974	-0.35	-0.197	3.435	3.282	3.784	3.478	0.181	0.015	-0.075	0.207	-0.126	0.363
srsf6	LS	Both	gene2161	M	X	X	X	X	U	D	gene17640	M	.	X	X	X	U	D	i	1.547	1.462	i	4.403	5.019	i	6.931	6.696	-0.191	-0.606	6.914	6.313	7.104	6.919	0.813	2.371	3.881	4.038	3.015	2.009
pds5a	LS	Both	gene40234	M	X	.	X	X	U	.	gene5429	M	.	.	X	X	U	.	i	2.159	0.734	i	0.975	0.968	i	4.639	4.406	0.108	-0.552	5.425	5.179	5.316	5.732	-0.266	-1.478	0.274	1.371	0.609	1.953
lamp1	LS	Both	gene13990	M	.	X	X	.	.	D	gene7362	M	.	X	X	.	U	D	i	0.371	1.142	i	2.465	2.177	i	3.26	3.03	0.318	-0.413	5.284	3.753	4.966	4.165	0.433	0.752	2.6	1.946	1.263	1.876
rbm25	LS	Both	gene11834	M	.	X	X	X	U	.	gene6752	M	.	X	X	X	U	D	i	0.489	0.412	i	1.902	2.117	i	5.212	4.986	-0.567	-1.011	4.986	4.632	5.553	5.643	-1.693	-0.854	1.257	2.443	1.891	2.089
hnrnpl	LS	Both	gene4752	M	X	X	X	X	U	D	gene48984	M	X	X	X	X	.	D	i	1.258	2.296	i	2.199	1.722	i	5.442	5.218	-0.343	-0.068	5.625	5.153	5.968	5.221	0.319	0.396	2.06	1.826	1.524	0.98
rpl10	LS	Both	gene19003	M	.	X	X	.	U	.	gene6971	M	X	.	X	X	.	.	i	2.226	3.547	i	1.506	0.468	i	3.034	2.813	0.178	-0.824	3.195	1.966	3.017	2.79	1.951	0.776	0.669	1.076	-0.373	-0.444
snw1	LS	Both	gene47554	M	.	.	X	X	U	.	gene19459	M	X	.	X	X	.	.	i	1.394	1.369	i	1.953	0.166	i	5.433	5.218	-0.242	-0.15	6.062	5.814	6.304	5.963	0.726	-0.718	1.046	0.124	1.959	1.416
epn1	LS	Both	gene12783	M	.	X	X	X	U	.	gene12485	M	X	X	X	X	U	D	i	0.926	1.52	i	1.553	3.763	i	3.751	3.538	-1.137	-0.647	3.764	3.646	4.902	4.294	0.332	1.006	0.923	3.781	0.867	1.509
eef2.1	LS	Both	gene2783	M	.	.	X	X	U	.	gene7584	M	X	.	X	X	.	.	i	0.159	1.813	i	0.526	0.885	i	3.401	3.196	0.353	0.06	4.503	3.717	4.149	3.657	-0.351	-1.308	0.819	0.702	0.815	1.703
tra2a	LS	Both	gene12779	M	X	X	X	X	.	D	gene3651	M	X	X	X	X	U	D	i	2.225	0.226	i	5.048	4.553	i	7.38	7.177	0.218	0.13	7.74	7.704	7.522	7.574	1.982	0.967	4.804	2.766	2.694	1.874
xbp1	LS	Both	gene45069	M	.	X	X	X	.	D	gene12324	M	.	X	X	X	D	D	i	1.226	0	i	5.018	5.018	i	7.037	6.838	0.093	1.39	7.607	8.486	7.513	7.096	2.439	2.42	4.563	4.474	2.107	2.202
atoh1	LS	Both	gene37549	M	.	X	X	.	U	D	gene36959	.	X	X	X	.	U	D	e	1.159	3.428	e	3.289	5.319	e	2.435	2.236	-1.585	-1.994	0.584	2.561	2.169	4.555	2.456	2.991	2.555	4.52	0.952	1.626
atp5po	LS	unk	gene233	M	.	.	.	.	.	.	gene16039	M	.	.	X	.	.	.	i	2.074	0	i	0.08	1.234	i	3.137	2.943	0.074	-0.069	3.089	4.104	3.015	4.173	0.104	-0.025	-0.244	1.798	1.179	1.848
mbd5	LS	Both	gene16067	M	X	X	X	X	D	.	gene9715	M	X	.	X	.	U	.	i	1.543	1.571	i	1.852	0.959	i	4.278	4.084	0.59	-0.27	5.015	4.188	4.425	4.458	0.305	0.646	1.521	0.582	1.141	0.093
hyal2	LS	Both	gene6387	M	.	.	X	X	U	.	gene41710	M	.	.	X	X	U	.	i	1.811	0	i	0.934	0.026	i	3.741	3.551	-1.014	-1.009	5.116	4.118	6.13	5.127	-0.979	-1.393	1.314	1.322	0.671	1.237
rps7	LS	Both	gene42482	M	.	X	X	X	U	D	gene20191	M	.	X	X	X	U	D	i	2.225	1.073	i	2.201	3.163	i	5.743	5.556	-0.207	-0.454	5.619	6.012	5.826	6.466	1.071	-0.023	2.081	3.252	0.889	1.842
znf654	LS	unk	gene4501	M	.	.	.	X	U	.	gene47218	M	.	.	X	X	.	.	i	0.073	0.394	i	1.328	0.801	i	3.772	3.587	-1.398	-0.956	2.845	2.582	4.243	3.538	0.122	-1.52	0.56	0.497	0.566	1.558
gtpbp2	LS	unk	gene11352	M	.	.	X	.	U	.	gene17313	M	.	.	.	.	U	.	i	0	4.84	i	0	1.298	i	4.185	4.012	-2.399	-1.314	1.446	1.7	3.845	3.014	1.268	0.093	0.445	1.525	-1.033	1.086
upk1b	LS	Both	gene12347	M	.	.	X	X	D	.	gene18615	M	.	.	X	X	U	.	i	2.81	1.002	i	1.007	0.696	i	4.363	4.194	1.096	-0.846	4.986	3.442	3.89	4.288	-1.069	1.602	0.093	-1.646	1.287	-0.787
polr2a	LS	Both	gene11531	M	.	X	X	X	.	.	gene41988	M	.	X	X	X	.	.	i	1.589	1.811	i	3.169	1.44	i	3.932	3.763	-0.611	-0.552	4.853	3.605	5.463	4.158	-0.052	1.098	2.435	0.904	2.172	-0.117
ckap2	LS	Both	gene7632	M	.	X	X	.	U	D	gene13926	M	.	.	X	.	U	.	i	0.546	1.451	i	3.131	0	i	6.113	5.944	-0.326	-1.704	5.063	2.673	5.389	4.377	0.876	1.362	2.108	0.615	1.551	-0.314
ventx2.1	LS	Both	gene38519	.	.	X	X	X	D	D	gene2529	.	X	X	X	X	.	D	e	0	6.06	e	4.925	5.58	i	10.613	10.444	0.734	0.282	11.093	11.511	10.359	11.23	0.525	2.186	4.158	4.677	2.259	2.553
kpna4	LS	Both	gene7097	M	.	X	X	X	U	.	gene9211	M	.	.	X	X	U	.	i	0.773	0.037	i	1.39	0.814	i	2.574	2.408	-0.162	-0.608	3.312	3.126	3.474	3.734	-0.916	-0.214	1.03	-0.009	1.382	0.538
skida1	LS	Both	gene15926	.	.	X	X	X	.	D	gene17335	.	.	X	X	X	D	D	e	0	2.396	e	5.932	6.136	e	3.875	3.711	0.516	1.111	4.888	4.284	4.372	3.173	2.58	2.706	4.607	5.039	3.587	3.557
eif2s3	LS	Both	gene2744	M	X	.	X	X	.	.	gene7163	M	X	.	X	X	U	.	i	1.811	1.919	i	0	0	i	2.916	2.759	-0.334	-0.375	3.705	3.874	4.039	4.249	-0.78	0.098	0.449	-0.27	1.404	0.712
pabpn1	LS	Both	gene6393	M	X	.	X	X	U	.	gene11058	M	X	X	X	X	U	D	i	1.511	2.313	i	1.275	2.489	i	5.341	5.185	-1.11	-1.265	5.263	4.952	6.373	6.217	-0.182	-0.754	1.314	2.249	0.359	1.647
usp7	LS	Both	gene13898	M	.	X	X	X	.	D	gene10531	M	.	X	X	X	.	D	i	0.246	0.773	i	1.629	2.168	i	3.233	3.078	0.397	0.033	4.48	4.38	4.083	4.347	-0.767	-0.496	1.903	1.505	1.764	1.474
ankrd10	LS	Both	gene8408	M	X	X	X	X	.	D	gene42531	M	X	X	X	X	.	D	i	1.447	1.696	i	2.553	3.984	i	1.917	1.765	0.063	0.47	2.703	3.626	2.64	3.156	1.696	0.674	1.85	3.231	0.457	2.33
acsl1	LS	Both	gene17415	M	.	X	X	X	U	.	gene2183	M	X	X	X	.	.	D	i	0	2.099	i	3.742	3.825	i	5.413	5.272	-2.332	-0.447	3.344	4.535	5.675	4.981	-0.272	0.363	2.479	3.344	2.744	1.62
adnp2	LS	Both	gene15151	M	.	.	X	X	U	.	gene20253	M	.	.	X	X	U	.	i	0.935	0.722	i	0	0.61	i	4.198	4.058	-0.688	-1.368	4.242	2.861	4.93	4.229	0.154	-0.896	0.542	0.409	0.171	1.019
csrnp2	LS	Both	gene12992	M	.	X	X	X	D	D	gene19176	M	X	X	X	X	D	D	i	0	3.454	i	6.103	4.917	i	5.421	5.285	1.258	1.06	5.398	5.687	4.141	4.627	3.034	1.517	5.478	4.186	2.339	3.136
spry1	LS	Both	gene3809	M	.	X	X	X	.	.	gene13291	M	.	X	X	.	D	.	i	2.811	0	i	5.401	6.104	i	8.808	8.672	-0.381	1.466	8.805	9.321	9.186	7.856	1.046	0.387	5.937	5.664	4.996	5.442
herpud1	LS	Both	gene8860	M	.	.	X	X	.	.	gene4602	M	X	X	X	X	.	.	i	1.113	5.253	i	1.205	2.337	i	3.677	3.555	-0.747	-0.815	3.627	3.204	4.374	4.019	-0.158	-0.043	0.61	2.049	1.386	0.749
srsf9	LS	Both	gene7976	M	.	X	X	X	.	.	gene12482	M	.	X	X	X	.	.	i	1.348	1.325	i	2.455	2.53	i	7.093	6.974	-0.03	-0.219	7.767	7.57	7.798	7.79	-0.628	-0.716	2.317	2.704	2.826	2.732
cops7b	LS	Both	gene8657	M	.	.	X	X	U	.	gene9146	M	.	.	X	.	.	.	i	0.642	1.13	i	0	1.502	i	3.842	3.726	-0.122	-0.585	4.984	3.883	5.106	4.469	-0.397	-0.919	0.143	1.256	1.238	1.303
taf12	LS	Both	gene11060	M	.	.	X	.	D	.	gene2729	M	.	.	X	.	D	D	i	1.642	1.226	i	2.461	1.67	i	5.979	5.864	0.442	0.581	6.434	6.435	5.993	5.853	-1.195	0.609	2.912	2.643	2.316	1.789
mycl	LS	Both	gene3755	M	X	X	X	.	.	D	gene48686	M	.	X	X	X	U	D	i	1.627	1.306	i	4.012	4.299	i	4.812	4.701	0.576	-0.758	5.024	5.301	4.448	6.059	1.456	1.484	3.452	3.563	1.83	2.091
ddx19b	LS	Both	gene19492	M	.	.	X	.	U	D	gene44915	M	.	.	X	.	.	.	e	0.065	0	i	0.114	1.118	i	3.722	3.614	-0.443	-0.313	4.103	4.058	4.546	4.371	-1.195	0.977	0.583	1.681	-0.357	0.995
canx	LS	Both	gene42840	M	.	X	X	X	U	.	gene3002	M	.	.	X	X	U	.	i	0.141	0.224	i	2.316	1.249	i	3.983	3.874	-1.296	-0.768	2.529	3.526	3.825	4.294	-0.487	-0.132	1.714	1.429	1.17	0.608
foxb1	LS	Both	gene19621	.	.	X	X	X	.	.	gene6711	.	.	X	X	X	.	.	e	0	0.367	e	6.305	5.774	e	5.37	5.262	0.425	1.292	4.015	5.47	3.59	4.178	3.481	1.577	5.67	5.09	2.524	3.851
fam168b	LS	Both	gene37172	M	X	.	X	.	.	.	gene16954	M	X	.	X	X	.	.	i	1.976	3.396	i	0	0	i	1.376	1.272	-0.116	0.163	1.517	2.568	1.633	2.405	-0.617	-0.211	-1.679	-1.265	-0.603	-0.677
ccni2	LS	Both	gene8008	M	.	.	X	X	.	.	gene6614	M	.	.	X	X	U	.	i	0.368	0	i	0.349	0.88	i	4.492	4.389	-0.552	-0.401	4.805	3.805	5.357	4.206	0.186	1.141	1.732	-0.143	0.503	-0.659
tuba5	LS	unk	gene2320	M	.	.	.	.	U	.	gene6000	M	X	X	X	X	U	D	e	0	0.813	i	1.925	1.954	i	3.519	3.418	-2.593	-1.992	3.791	3.237	6.383	5.229	0.284	0.235	0.722	1.131	0.823	1.028
ilf3	LS	Both	gene49813	M	.	X	X	X	U	D	gene13518	M	.	X	X	X	U	D	i	0.893	1.118	i	5.858	5.131	i	7.209	7.114	-0.426	-0.39	7.223	7.04	7.65	7.43	0.453	0.224	5.901	5.159	4.156	3.838
upf1	LS	Both	gene19932	M	X	.	X	.	U	.	gene12327	M	X	.	X	.	D	U	i	1.367	1.379	i	0.357	0.634	i	3.829	3.745	-1.103	-0.377	4.087	4.068	5.19	4.446	-0.148	-1.325	0.265	-0.135	0.908	0.712
gadd45a	LS	Both	gene2743	M	X	X	X	.	D	D	gene39030	M	X	X	X	X	U	D	i	2.395	3.547	i	6.41	5.037	i	7.699	7.617	0.812	0.149	7.807	7.503	6.995	7.354	2.601	1.253	6.323	4.445	3.417	2.481
hnrnpdl	LS	Both	gene327	M	X	X	X	X	D	D	gene35573	M	X	X	X	X	U	D	i	1.703	2.004	i	3.36	3.891	i	6.619	6.542	0.854	-0.176	7.453	7.102	6.598	7.278	1.05	0.528	3.183	3.346	2.237	2.951
foxd3	LS	Both	gene43111	.	.	X	X	X	D	D	gene41506	.	X	X	X	X	.	.	e	0.367	4.838	e	6.189	5.462	e	5.276	5.202	1.131	1.337	5.413	4.967	4.282	3.63	4.173	5.092	4.698	3.616	1.672	1.082
larp4b	LS	Both	gene36968	M	.	X	X	X	.	D	gene41658	M	X	X	X	X	.	.	i	0.373	1.684	i	3.11	1.498	i	4.148	4.085	-0.334	-0.097	4.94	4.622	5.273	4.719	0.368	-0.407	2.903	1.287	2.159	1.768
prdm14	LS	Both	gene9045	.	.	X	X	X	.	D	gene4736	.	.	X	X	X	D	D	e	3.395	0	i	9.068	9.165	i	7.009	6.946	-1.186	3.635	5.597	7.583	6.783	3.948	5.52	4.344	8.96	8.715	3.535	4.536
sertad1	LS	unk	gene10492	M	.	.	.	.	.	.	gene1276	M	X	X	X	.	D	D	i	1.815	1.81	i	5.093	3.948	i	5.766	5.707	-0.347	2.453	5.191	4.881	5.538	2.427	1.305	2.656	3.757	2.916	3.117	0.911
stox1	LS	Both	gene18657	M	X	X	X	X	.	D	gene599	M	X	X	X	X	D	D	i	2.717	1.811	i	4.16	3.284	i	7.692	7.634	-0.025	1.138	6.55	6.726	6.575	5.589	-1.808	3.516	2.688	1.899	1.756	-1.503
atp5f1b	LS	unk	gene19969	M	.	.	.	.	.	.	gene13760	M	.	.	X	.	U	.	i	2.034	1.677	i	1.432	0	i	2.774	2.717	0.735	-0.165	3.291	2.748	2.556	2.913	1.234	0.329	1.545	0.041	0.372	0.008
vezf1	LS	Both	gene16961	M	X	X	X	.	.	D	gene7337	M	.	X	X	X	.	.	i	1.918	0.395	i	3.313	2.76	i	5.295	5.243	0.014	0.489	6.342	6.011	6.329	5.522	1.097	0.299	2.176	1.415	1.208	2.49
mknk2	LS	Both	gene9784	M	.	X	X	X	.	D	gene41709	M	X	X	X	X	.	D	i	1.053	0.37	i	2.581	3.506	i	4.377	4.326	-0.095	0.141	3.875	3.551	3.97	3.41	1.172	3.009	2.691	3.349	1.335	0.661
rps23	LS	Both	gene347	M	X	.	X	X	.	.	gene46642	M	.	.	X	X	.	.	i	2.808	0.221	i	0	0.48	i	3.882	3.832	-0.531	-0.017	3.354	3.468	3.885	3.485	-1.215	1.6	-0.683	1.063	0.316	-0.494
sfpq	LS	Both	gene18146	M	X	X	X	X	U	D	gene11773	M	X	X	X	X	.	D	i	1.202	2.017	i	4.163	3.717	i	6.884	6.836	-0.488	0.024	7.107	7.245	7.596	7.221	0.134	0.78	4.434	3.729	2.733	2.048
egr1	LS	Both	gene9650	.	.	X	X	X	.	.	gene47664	M	.	.	X	X	.	.	e	0	0.001	i	3.46	0	i	6.219	6.174	-0.026	0.024	5.937	5.952	5.963	5.928	3.808	-0.943	4.071	1.748	0	1.637
sox1	LS	Both	gene9219	.	.	X	X	X	U	D	gene8918	.	.	X	X	.	U	.	e	3.253	0.368	e	7.205	3.65	e	4.751	4.706	-1.578	-1.361	4.253	3.604	5.831	4.965	4.585	1.471	4.567	1.178	2.68	0.083
pafah1b3	LS	Both	gene38659	M	.	.	X	.	.	.	gene45999	M	.	X	X	X	D	D	i	0.81	0	i	0	3.168	i	4.184	4.141	-1.343	2.018	3.24	4.787	4.583	2.768	1.023	0.217	-3.44	3.394	-0.641	1.811
rbm33	LS	Both	gene40870	M	.	X	X	X	U	.	gene42456	M	.	X	X	X	.	D	i	1.022	0	i	1.496	1.994	i	3.752	3.709	-0.393	-0.242	4.324	5.807	4.717	6.049	-0.281	-1.874	1.382	2.027	1.285	2.209
phax	LS	Lon	gene10020	M	.	.	X	.	U	.	gene36219	M	.	.	.	.	.	.	i	1.224	0.395	i	0	0	i	2.551	2.508	-0.441	-0.637	3.242	3.331	3.683	3.969	0.31	0.383	-0.618	0.333	-0.837	0.319
zbtb34	LS	Both	gene4515	M	.	.	X	X	.	.	gene3457	M	X	X	X	X	U	.	i	1.81	2.618	i	2.199	1.921	i	5.254	5.217	-0.471	-0.754	4.885	4.774	5.356	5.529	-0.239	-0.884	2.138	0.676	1.77	1.095
sp3	LS	Both	gene6464	M	X	.	X	X	U	.	gene3621	M	.	.	X	X	U	.	i	1.811	1.225	i	0.729	0.228	i	4.11	4.077	-0.707	-0.75	4.082	4.267	4.789	5.017	0.248	-0.125	0.035	-0.067	0.003	0.34
axin2	LS	Both	gene50943	M	X	X	X	X	.	D	gene10843	M	.	X	X	X	U	D	i	1.184	0.351	i	2.608	2.277	i	3.356	3.324	-0.024	-0.901	4.066	3.505	4.09	4.406	-0.053	0.323	2.918	2.369	2.243	1.998
ctdsp2	LS	Both	gene20361	M	.	.	X	X	.	.	gene39186	M	X	.	X	X	.	.	i	0	3.224	i	1.353	1.385	i	4.126	4.097	-0.559	0.027	3.831	3.936	4.39	3.908	0.936	0.338	0.664	1.551	0.738	0.509
acin1	LS	Both	gene2362	M	.	X	X	X	U	D	gene19443	M	X	X	X	X	U	D	i	0.942	1.3	i	1.268	0.976	i	3.691	3.675	0.085	-0.313	4.395	4.131	4.31	4.444	-0.53	0.443	1.468	0.941	1.142	0.666
eif3a	LS	Both	gene1120	M	X	X	X	X	U	D	gene40629	M	X	.	X	X	.	.	i	1.183	2.395	i	0.968	0.649	i	3.134	3.118	-0.582	-0.098	3.164	3.216	3.746	3.314	0.018	-0.583	1.222	0.209	0.723	0.7
fbrs	LS	Both	gene2652	M	.	X	X	X	U	D	gene16562	M	.	X	X	X	.	D	i	1.395	1.045	i	1.719	2.154	i	4.631	4.618	-0.799	0.158	4.518	5.438	5.317	5.28	-0.644	-0.572	2.243	2.174	1.679	1.581
trir	LS	Both	gene4726	M	.	.	X	X	.	.	gene8421	M	.	.	X	X	.	.	i	0.367	1.297	i	1.771	1.657	i	4.591	4.579	-0.599	-0.564	4.303	4.738	4.901	5.302	0.18	0.257	1.894	1.798	0.506	1.585
dtl	LS	Both	gene5946	M	.	.	X	.	U	.	gene42804	M	.	X	X	.	U	.	i	0	0.49	i	1.148	1.314	i	2.968	2.958	-0.812	-1.281	2.206	2.638	3.018	3.919	-0.617	-1.349	0.407	0.61	0.52	1.185
rpl29	LS	Both	gene3756	M	.	.	X	X	.	.	gene15650	M	.	.	X	X	.	.	i	0.805	2.029	i	2.314	1.601	i	4.757	4.748	-0.243	-0.188	5.626	5.091	5.868	5.279	-0.125	1.057	1.315	0.731	2.643	1.504
yme1l1	LS	Both	gene17272	M	X	.	X	.	U	.	gene20380	M	.	.	X	.	D	.	i	3.073	0.61	i	0.938	0	i	3.174	3.166	0.09	0.842	3.792	3.705	3.702	2.863	-0.267	-0.578	-0.424	-1.336	0.813	0.269
smtn	LS	Both	gene14980	M	X	X	X	X	U	D	gene11435	M	X	X	X	.	.	D	i	1.325	1.114	i	3.149	2.553	i	3.988	3.981	0.017	0.016	4.348	4.063	4.331	4.046	1.418	1.058	2.96	3.026	1.047	1.029
vcp	LS	unk	gene44785	M	.	X	X	.	.	.	gene10712	M	.	.	.	.	U	.	i	0.866	2.269	i	1.997	1.58	i	1.867	1.862	0.127	-0.288	2.651	3.158	2.523	3.446	1.055	-0.153	1.136	1.918	0.714	1.172
letm2	LS	Both	gene4910	M	.	.	X	.	.	.	gene20553	M	.	.	X	.	.	.	i	1.223	0.965	i	2.136	0	i	3.529	3.527	-0.479	-0.218	3.38	2.526	3.859	2.744	-0.713	-0.997	1.913	0.166	0.413	0.534
ssr1	LS	Both	gene13482	M	.	.	X	X	U	.	gene6958	M	.	X	X	X	.	D	i	0.488	0.809	i	1.287	4.472	i	4.622	4.63	-0.618	-0.361	5.199	5.844	5.817	6.205	0.383	0.095	0.142	3.857	0.725	3.709
syncrip	LS	Both	gene12287	M	X	X	X	X	U	D	gene16373	M	.	X	X	X	U	D	i	1.324	0.352	i	3.114	2.966	i	6.018	6.03	-0.368	-0.46	6.503	6.514	6.871	6.974	-0.186	0.306	3.666	2.905	2.774	1.616
slc1a5	LS	Both	gene18564	M	X	X	X	.	D	D	gene8251	M	.	X	X	.	U	D	i	2.227	0	i	4.387	5.542	i	7.075	7.089	0.879	-0.611	6.267	6.36	5.388	6.971	2.314	1.358	2.746	4.15	1.767	2.543
dazap1	LS	Both	gene10997	M	.	X	X	X	U	D	gene6419	M	X	X	X	X	U	.	i	0.853	1.29	i	2.14	1.295	i	4.728	4.742	-1.431	-1.587	4.038	4.07	5.468	5.657	0.124	-0.501	1.428	1.061	1.78	1.305
pcdh7	LS	Both	gene2494	.	X	X	X	X	D	D	gene42799	.	.	X	X	X	U	D	e	4.133	3.395	i	8.1	8.62	i	9.611	9.631	0.662	0.459	10.124	9.936	9.462	9.477	1.971	4.101	7.343	6.219	6.344	5.231
kdm1a	LS	Both	gene17754	M	X	X	X	X	U	.	gene164	M	.	X	X	X	U	D	i	1.674	0.225	i	2.754	3.457	i	4.52	4.543	-0.379	-0.356	5.102	5.398	5.481	5.754	0.188	1.024	2.501	3.314	2.454	2.373
lhx1	LS	Both	gene16543	.	.	X	X	X	U	.	gene1335	M	.	X	X	X	U	D	i	0.367	0.367	i	4.981	8.802	i	8.959	8.984	-1.379	-1.102	8.251	8.386	9.631	9.488	2.828	-0.641	4.761	8.692	1.637	7.515
myd88	LS	Both	gene35579	M	.	.	X	.	U	D	gene15114	M	.	.	X	.	U	.	i	1.332	0.596	i	1.146	0	i	3.697	3.728	-1.691	-1.174	4.513	4.169	6.204	5.343	-0.98	-0.769	0.906	-0.679	1.417	1.204
unc5b	LS	Both	gene42466	M	X	X	X	X	D	D	gene46311	M	.	X	X	X	D	D	i	1.126	0.717	i	5.079	4.614	i	4.333	4.374	2.863	1.85	5.789	5.481	2.926	3.631	2.65	3.154	5.235	4.438	1.86	0.838
bcor	LS	Both	gene40017	M	X	X	X	.	U	D	gene5990	M	X	X	X	.	U	D	i	2.148	1.869	i	4.5	4.455	i	2.847	2.887	0.606	-0.398	3.309	4.112	2.703	4.51	0.884	0.603	4.152	4.839	3.508	3.247
wdr83os	LS	unk	gene15742	M	.	.	X	X	U	.	gene16203	M	.	.	.	X	.	.	i	0	0.369	i	1.359	2.808	i	6.792	6.837	-0.445	-1.265	7.322	6.34	7.768	7.605	-0.812	1.485	1.313	0	2.092	1.637
sp8	LS	unk	gene3386	.	.	.	.	X	.	D	gene48859	.	.	X	X	X	U	D	i	0	0	e	7.519	8.507	e	5.273	5.319	0.608	-0.253	5.591	6.078	4.983	6.331	3.271	2.985	6.236	8.41	3.992	6.025
zranb2	LS	Both	gene42447	M	X	.	X	X	.	U	gene875	M	X	.	X	X	U	.	i	0.892	1.101	i	0	0.34	i	3.574	3.621	0.301	0.256	4.45	5.151	4.149	4.894	-1.672	-0.89	-0.37	0.732	1.172	1.319
rnf11	LS	Both	gene1514	M	.	X	X	.	U	D	gene17427	M	.	X	X	.	U	.	i	0.488	0.811	i	5.044	4.922	i	6.978	7.026	-1.229	-1.024	6.483	7.384	7.712	8.408	0.989	0.019	4.867	4.271	2.791	2.996
bcl2l11	LS	Both	gene19178	M	.	X	X	.	U	D	gene9855	M	X	X	X	X	U	D	i	1.23	3.394	i	4.247	4.633	i	5.446	5.497	-0.476	-1.414	3.727	4.025	4.203	5.439	2.046	0.767	3.416	3.988	1.008	2.707
ppp4r1	LS	Both	gene12277	M	.	X	X	X	U	.	gene6494	M	X	.	X	X	U	.	i	0.861	1.613	i	1.549	0.461	i	3.041	3.106	-0.372	-0.389	4.057	3.556	4.43	3.945	-0.297	-0.456	0.595	0.449	1.42	0.87
chd7	LS	Both	gene45283	M	X	X	X	X	U	D	gene13221	M	X	X	X	X	U	D	i	1.892	2.135	i	3.335	3.996	i	5.494	5.56	-0.717	-0.731	4.422	5.009	5.139	5.74	-0.555	-0.372	2.56	4.111	2.485	3.239
hsph1	LS	Both	gene3180	M	X	.	X	X	.	.	gene15346	M	.	X	X	X	.	U	i	1.169	0	i	0.799	1.663	i	3.515	3.588	-0.066	-0.726	4.426	3.193	4.492	3.919	-0.824	-1.397	0.621	0.901	1.424	1.084
nup153	LS	Both	gene12054	M	.	X	X	X	U	D	gene6826	M	.	X	X	X	U	U	i	0.808	0.374	i	1.233	1.097	i	3.135	3.208	0.114	0.151	4.058	3.252	3.944	3.101	-0.292	-1.252	1.266	0.764	0.986	1.503
srrm2	LS	Both	gene7954	M	X	X	X	X	U	.	gene161	M	.	.	X	.	U	.	i	2.132	1.092	i	1.858	1.223	i	3.638	3.712	-1.157	-1.032	3.414	3.639	4.572	4.671	-0.977	-0.486	1.379	0.525	1.735	1.263
tcea1	LS	Both	gene16751	M	X	.	X	.	.	.	gene9321	M	.	.	X	X	U	.	i	1.448	1.029	i	0.273	0.084	i	1.953	2.029	-0.287	-0.752	3.191	1.75	3.478	2.502	-0.788	1.17	-0.571	-1.631	0.665	-0.936
rnf10	LS	Both	gene48647	M	.	.	X	X	.	.	gene10102	M	.	.	X	X	.	.	i	1.339	1.547	i	1.406	1.771	i	3.117	3.196	-0.182	-0.163	3.004	3.941	3.186	4.104	0.257	0.071	0.925	1.41	0.685	1.167
ier5l	LS	Both	gene1570	M	X	X	X	X	.	.	gene8878	M	X	.	X	X	D	.	e	1.34	1.04	e	0.594	0.199	e	0.754	0.839	-0.079	0.497	-0.108	0.759	-0.029	0.263	1.788	0.862	0.059	-0.191	-0.238	-0.165
foxn2	LS	Both	gene13727	M	X	X	X	X	.	.	gene11178	M	X	X	X	.	.	D	i	2.547	1.324	i	2.812	2.761	i	5.651	5.743	-0.005	-0.114	6.287	5.878	6.292	5.991	0.437	0.404	2.161	1.898	2.015	2.035
id2	LS	Both	gene4758	M	X	X	X	X	U	D	gene19655	M	.	X	X	.	U	D	i	1.45	0.228	i	5.179	5.083	i	5.096	5.188	-2.119	-2.495	3.434	3.658	5.553	6.153	1.892	2.717	4.202	4.79	2.511	2.27
rpl15	LS	Both	gene2403	M	.	.	X	X	.	.	gene14203	M	.	.	X	X	.	.	i	0	1.954	i	2.22	1.728	i	3.719	3.818	-0.256	-0.297	3.992	4.543	4.247	4.839	-0.843	0.602	2.26	0.643	0.952	0.417
cox7c	LS	Both	gene20239	M	.	.	X	X	.	.	gene7867	M	.	.	X	.	.	D	i	1.81	1.225	i	0.507	1.349	i	4.027	4.134	0.225	-0.199	4.813	4.383	4.588	4.582	0.865	0.821	1.087	1.708	-0.904	0.217
rbm27	LS	Both	gene19209	M	.	.	X	X	U	.	gene16062	M	X	X	X	X	.	.	i	1.004	1.395	i	0.692	1.218	i	3.452	3.56	-0.402	0.532	3.681	4.061	4.083	3.529	-0.084	0.124	-0.628	0.853	0.627	0.883
prrg2	LS	Both	gene3443	M	.	.	X	X	U	.	gene1551	M	X	X	X	X	.	D	i	3.129	2.811	i	0.362	3.657	i	5.57	5.679	-0.583	0.103	6.662	6.436	7.245	6.333	0.282	2.692	-0.275	4.406	0.821	0.896
cbx5	LS	Both	gene14119	M	.	X	X	X	.	D	gene4940	M	X	X	X	X	D	D	i	0.673	1.811	i	4.607	3.655	i	5.839	5.951	0.529	0.593	5.714	6.432	5.185	5.839	1.735	2.241	4.628	3.59	2.297	1.179
sptssa	LS	unk	gene37775	M	.	X	X	.	D	D	gene34605	M	.	.	.	X	D	D	i	0	2.393	i	3.937	7.007	i	6.873	6.987	0.708	0.01	7.706	7.737	6.998	7.726	0.608	2.922	3.839	6.89	2.408	3.842
nasp	LS	Both	gene14664	M	X	X	X	.	U	D	gene12754	M	.	.	X	.	U	.	i	1.561	1.147	i	1.564	0	i	3.232	3.35	-0.38	-0.477	2.838	1.903	3.219	2.38	0.485	-0.054	1.395	-0.484	0.974	0.512
rc3h1	LS	Both	gene3063	M	X	.	X	X	U	.	gene49495	M	X	.	X	X	.	.	i	1.116	1.551	i	0.279	0.365	i	3.555	3.678	-0.417	-0.126	4.154	4.131	4.571	4.256	0.075	0.11	0.423	-0.191	0.523	0.117
ddx21	LS	Both	gene11970	M	X	.	X	X	.	.	gene35661	M	.	.	X	.	U	.	i	1.548	0.179	i	0.265	0	i	4.053	4.177	-0.188	0.079	4.294	5.055	4.481	4.976	-0.49	0.75	0.261	0.168	0.722	0.939
tp53inp1	LS	Both	gene15817	M	.	X	X	X	U	.	gene12221	M	.	X	X	X	D	D	i	3.809	0	i	3.438	4.874	i	7.205	7.335	-0.076	0.631	5.615	6.432	5.691	5.801	1.509	0.2	2.43	3.955	1.978	3.156
eif3i	LS	unk	gene11788	M	.	.	.	X	.	.	gene11729	M	.	.	X	.	.	.	i	0	1.223	e	0	0.199	i	3.157	3.292	-0.772	0.499	3.202	4.919	3.974	4.42	0.082	0.315	-0.146	0.061	-0.17	0.1
dnaja2	LS	Both	gene43347	M	X	X	X	X	.	.	gene15542	M	.	.	X	X	.	.	i	2.461	1.172	i	1.844	1.734	i	4.172	4.313	0.545	0.484	4.957	5.696	4.412	5.212	0.676	0.447	1.414	0.575	0.535	1.017
smarcd1	LS	Both	gene50236	M	X	.	X	X	U	.	gene5434	M	.	.	X	X	U	.	i	1.587	1.157	i	0	0	i	3.008	3.149	-0.398	-0.503	2.913	3.7	3.31	4.203	-1.039	-0.129	-1.235	-0.622	-0.402	0.092
nop58	LS	Both	gene1442	M	.	.	X	X	U	.	gene36171	M	.	X	X	X	U	D	i	0.56	0.447	i	1.752	4.323	i	5.322	5.466	-0.06	-0.168	6.105	6.722	6.165	6.89	0.044	1.079	1.847	4.634	1.901	2.847
smad4	LS	Both	gene3335	M	.	X	X	X	U	D	gene20210	M	.	X	X	X	D	D	i	0.132	1.073	i	3.12	3.271	i	5.247	5.409	-0.296	-0.636	6.171	5.614	6.467	6.25	-0.229	0.035	2.217	3.043	2.468	2.047
pkn2	LS	Both	gene11882	M	X	.	X	X	U	.	gene10572	M	.	.	X	X	.	.	i	1.604	0.696	i	0	0.019	i	2.664	2.826	-0.454	-0.317	2.785	3.795	3.239	4.112	-0.401	0.069	-0.334	0.236	0.903	0.703
anp32c	LS	Both	gene17236	M	.	X	X	X	.	D	gene15272	M	X	X	X	X	.	D	i	0.488	1.466	i	3.61	4.817	i	8.157	8.323	-0.046	0.429	8.632	8.473	8.677	8.045	1.136	1.718	2.575	4.489	2.385	2.619
ube2d3	LS	Both	gene18510	M	.	X	X	X	U	.	gene3922	M	.	X	X	X	U	D	i	0.895	0.029	i	1.628	2.711	i	4.133	4.3	-0.42	-0.668	4.673	4.66	5.092	5.328	-0.105	-0.398	0.953	2.156	1.514	2.384
ddx3x	LS	Both	gene529	M	.	X	X	X	U	.	gene1150	M	X	X	X	X	U	.	i	0.935	1.38	i	1.345	2.323	i	3.967	4.143	0.535	0.541	4.84	5.212	4.305	4.672	-0.346	0.049	1.12	1.906	0.995	1.85
ak6	LS	Both	gene4921	M	.	.	X	.	.	.	gene1360	M	.	X	X	.	D	.	i	1.809	1.223	e	0.265	0.595	i	4.021	4.201	-0.009	-0.319	4.497	5.001	4.506	5.32	-0.042	-0.033	-0.162	0.655	-0.026	0.931
c6orf62	LS	Son	gene13229	M	.	.	.	X	.	.	gene6208	M	X	.	X	X	D	.	i	0.814	2.153	i	0	1.63	i	3.2	3.389	0.208	1.223	4.634	4.616	4.426	3.392	-0.418	-0.535	0.753	0.734	1.831	1.379
grhl1	LS	Both	gene15909	M	X	X	X	X	U	D	gene18890	M	X	X	X	X	U	D	i	0.942	1.482	i	3.027	3.481	i	2.547	2.737	-0.266	-0.889	3.322	3.444	3.588	4.333	1.793	1.449	3.839	4.122	0.766	1.925
dr1	LS	Both	gene44852	M	.	.	X	.	.	.	gene14437	M	.	.	X	X	U	.	e	0.423	0.036	i	2.31	0.344	i	5.314	5.507	0.112	-0.199	6.824	6.376	6.712	6.575	-0.203	0.603	0.903	-3.125	1.897	0.09
tmpo	LS	Both	gene11832	M	.	.	X	X	U	D	gene49612	M	.	.	X	X	U	.	i	1.119	0	i	1.498	1.801	i	5.415	5.608	-0.671	-0.979	5.314	5.432	5.984	6.411	0.184	-0.61	1.524	1.636	0.974	1.89
irf2bp2	LS	Both	gene35182	M	.	X	X	.	.	D	gene4176	M	X	X	X	X	U	.	i	1.433	2.912	i	3.573	5.199	i	4.898	5.094	-0.272	-0.752	5.681	5.347	5.953	6.099	-0.027	1.921	2.85	3.023	2.511	2.63
mosmo	LS	Both	gene11145	M	.	X	X	.	U	D	gene802	M	.	X	X	X	.	D	i	1.11	1.395	i	3.079	3.312	i	6.045	6.243	-0.219	-0.069	6.011	6.444	6.23	6.514	0.879	0.594	2.78	2.645	1.201	1.757
lrig3	LS	Both	gene43218	M	.	X	X	X	.	D	gene14120	M	.	X	X	X	.	D	i	1.132	1.1	i	3.863	4.533	i	6.703	6.906	-0.282	-0.269	7.098	6.6	7.38	6.869	-2.479	-0.995	3.607	4.545	3.659	3.183
top2b	LS	Both	gene15286	M	X	X	X	X	U	D	gene19611	.	.	X	X	X	U	.	i	1.255	0.225	i	3.444	2.325	i	5.665	5.869	-1.524	-0.012	4.994	6.168	6.518	6.181	-1.012	-0.438	2.4	0.863	2.289	1.434
tmem184b	LS	Both	gene17431	M	X	X	X	X	U	.	gene5153	M	X	X	X	.	U	D	i	1.533	2.926	i	2.146	2.776	i	3.337	3.558	0.124	-0.809	5.247	5.219	5.124	6.027	1.015	1.911	1.903	2.095	2.177	0.963
zmym2	LS	Both	gene17501	M	.	X	X	X	U	D	gene19169	M	X	X	X	X	U	D	i	0.045	2.685	i	2.847	3.588	i	4.664	4.891	-0.621	-0.522	4.679	5.019	5.301	5.541	-0.25	0.068	2.271	3.349	2.222	2.593
mex3c	LS	Both	gene12421	M	X	X	X	X	U	D	gene783	M	X	X	X	X	U	D	i	1.81	0	i	6.161	6.247	i	8.506	8.745	-2.811	-1.561	6.491	7.1	9.302	8.661	-2.756	0.677	5.572	5.872	5.035	4.088
ing2	LS	Both	gene15006	M	.	X	X	.	U	.	gene1039	M	.	X	X	.	U	.	i	0	1.488	i	2.3	2.992	i	4.188	4.433	-1.267	-1.636	3.169	4.187	4.436	5.823	2.134	-0.209	0.626	1.31	0.08	2.157
srsf1	LS	Both	gene45282	M	.	X	X	X	U	D	gene40133	M	.	X	X	X	.	D	i	0	1.324	i	4.988	3.53	i	7.602	7.849	-0.3	-0.149	7.783	8.07	8.083	8.218	2.108	0.167	3.829	3.247	2.163	2.276
lmo4.2	LS	Both	gene36053	M	.	X	X	X	U	D	gene15321	M	.	X	X	X	U	D	i	0	0.694	i	5.132	6.874	i	4.425	4.672	-1.692	-1.958	3.379	4.63	5.071	6.588	2.035	2.258	4.552	6.248	3.025	5.044
admp	LS	Both	gene16268	.	.	X	X	X	D	.	gene7858	.	.	.	X	X	D	.	i	0	3.253	e	6.251	4.128	e	10.81	11.059	1.606	2.052	11.508	11.391	9.902	9.339	3.489	4.454	4.568	1.757	1.637	0
mpdu1	LS	Lon	gene678	M	.	.	X	X	.	.	gene39118	M	.	.	.	X	.	.	i	0.227	0.227	i	2.179	6.141	i	3.39	3.639	-0.532	0.098	3.238	3.258	3.77	3.16	2.107	0.354	2.204	5.879	0.587	5.816
rbl1	LS	Both	gene8725	M	.	X	X	X	U	D	gene3980	M	X	X	X	X	.	D	i	0.911	1.668	i	1.57	2.001	i	5.042	5.292	-0.434	-0.216	4.889	5.379	5.323	5.595	0.01	-0.325	2.223	2.412	1.155	1.672
ilf2	LS	Both	gene45720	M	.	X	X	X	U	D	gene5983	M	.	.	X	.	U	.	i	0.369	0	i	1.906	1.032	i	5.114	5.366	-1.074	-0.084	4.969	5.598	6.042	5.682	0.679	0.448	1.578	0.15	0.58	0.7
wdr43	LS	Both	gene3642	M	.	X	X	X	U	.	gene38309	M	.	X	X	X	U	D	i	1.057	0.707	i	1.684	2.038	i	3.264	3.53	-1.301	-1.403	2.691	2.918	3.991	4.321	0.401	0.526	1.127	1.813	0.788	1.514
nipbl	LS	Both	gene13936	M	X	X	X	X	U	D	gene35395	M	.	X	X	X	U	D	i	0.982	0.63	i	3.15	2.562	i	5.02	5.289	-0.202	-0.37	5.824	5.918	6.026	6.288	0.054	-1.054	3.376	2.843	2.58	2.613
phf12	LS	Both	gene46184	M	X	X	X	.	U	D	gene239	M	X	X	X	.	.	D	i	1.534	1.993	i	3.426	3.895	i	6.172	6.443	-0.305	-0.199	6.971	7.502	7.276	7.701	0.426	-0.501	3.305	4.901	2.567	3.872
pdcd4	LS	Both	gene331	M	.	X	X	.	U	.	gene14529	M	.	X	X	X	U	.	i	1.225	0	i	3.373	3.261	i	3.945	4.234	-2.644	-2.094	1.839	2.564	4.483	4.659	-1.233	-0.488	2.846	2.106	2.253	1.941
acvr2a	LS	Both	gene15661	M	.	.	X	X	U	.	gene19850	M	.	X	X	X	U	.	i	0	1.27	i	1.174	2.131	i	4.801	5.094	0.126	-0.469	6.203	5.16	6.077	5.629	0.376	0.334	0.53	1.321	0.727	1.026
sf3b3	LS	Both	gene14277	M	.	.	X	X	U	.	gene13394	M	.	.	X	X	U	.	i	0.81	0.605	i	0.681	0.485	i	3.982	4.277	0.212	-0.408	4.853	4.368	4.642	4.777	-0.215	0.371	1.216	-0.293	1.094	0.903
atg16l1	LS	Both	gene41268	M	X	X	X	X	D	.	gene20043	M	X	X	X	X	.	.	i	1.7	1.26	i	2.03	2.28	i	8.092	8.388	0.206	-0.503	7.318	5.934	7.112	6.437	0.142	0.104	0.376	1.253	1.611	1.37
smad7	LS	Both	gene9873	M	.	X	X	X	U	D	gene16011	M	X	X	X	.	U	D	i	1.618	1.81	i	6.459	5.978	i	5.863	6.166	-0.987	-0.628	6.011	5.635	6.998	6.264	0.781	1.826	6.885	6.083	5.261	3.668
sox8	LS	Both	gene6967	.	.	X	X	.	U	D	gene5376	.	.	X	X	.	U	D	i	0	3.252	i	7.469	7.471	i	6.856	7.159	-1.602	-1.188	6.459	6.803	8.061	7.991	0.656	1.225	7.941	6.092	6.223	4.547
znf653	LS	Both	gene12486	M	.	X	X	X	U	.	gene8987	M	.	X	X	.	.	D	i	1.81	0	i	3.582	4.516	i	5.546	5.851	0.015	-0.177	5.982	5.583	5.968	5.76	0.87	0.832	2.726	3.5	1.832	2.857
chrd.1	LS	Both	gene46524	.	.	.	X	X	.	.	gene41888	.	.	X	X	X	U	D	e	0	0.367	i	3.39	7.046	i	11.789	12.094	0.432	-0.18	12.435	12.289	12.002	12.469	0.014	1.762	2.758	5.341	3.121	4.535
gigyf1	LS	Both	gene8481	M	.	.	X	X	.	.	gene16759	M	.	.	X	X	U	.	i	1.009	0.639	i	0.887	0.416	i	2.475	2.781	-0.555	-1.07	2.849	2.474	3.404	3.544	0.528	-0.05	-0.057	-0.53	0.635	-0.651
metrnl	LS	Both	gene9313	M	X	X	X	X	.	D	gene15629	M	X	X	X	X	U	D	i	2.81	3.547	i	5.243	5.512	i	6.667	6.974	-0.351	-0.629	7.214	7.05	7.565	7.679	1.759	1.679	4.566	5.613	3.07	3.332
krt8.1	LS	Both	gene17810	M	X	X	X	X	U	D	gene5042	M	X	X	X	X	U	D	i	1.712	2.395	i	5.404	5.253	i	5.494	5.807	-1.186	-1.115	4.765	4.479	5.952	5.594	0.923	3.103	5.598	5.066	4.146	1.904
chaf1a	LS	Both	gene34725	M	X	X	X	X	.	.	gene10089	M	X	.	X	X	U	.	i	1.425	1.093	i	1.09	0.831	i	1.727	2.042	-0.405	-0.381	2.567	3.09	2.972	3.471	0.534	-0.43	0.076	1.506	0.716	1.413
ubr7	LS	Both	gene13160	M	.	.	X	X	U	.	gene2001	M	.	.	X	X	.	.	i	0.619	0.226	i	0	1.062	i	2.965	3.281	-0.783	-0.494	3.405	3.686	4.188	4.18	-2.203	-0.083	0.216	0.833	1.095	1.089
ran	LS	Both	gene1798	M	.	X	X	X	U	D	gene960	M	X	X	X	X	U	D	i	1.003	1.737	i	2.481	3.215	i	4.623	4.947	-0.549	-0.435	5.033	5.424	5.582	5.859	-0.103	-0.032	1.996	3.435	1.857	2.78
pcna	LS	Both	gene6760	M	.	X	X	.	U	D	gene50055	M	.	X	X	.	.	D	i	1.134	1.225	i	3.083	4.069	i	5.802	6.127	-0.475	0.173	5.388	5.966	5.863	5.793	0.339	0.968	1.661	4.043	1.56	3.208
ctcf	LS	Both	gene20356	M	X	X	X	.	.	D	gene3157	M	.	.	X	X	.	.	i	1.503	0	i	1.371	1.398	i	4.544	4.872	-0.289	0.068	5.073	6.257	5.363	6.189	-0.421	-1.437	0.743	1.018	1.017	1.132
cul4b	LS	Both	gene8002	M	.	.	X	X	U	.	gene10416	M	.	X	X	X	U	.	i	0.71	0.892	i	0	1.978	i	2.263	2.592	-0.604	-0.566	2.514	3.472	3.118	4.038	0.276	0.139	-1.083	1.135	-0.258	1.113
serbp1	LS	Both	gene18796	M	.	.	X	X	.	U	gene10142	M	.	.	X	X	.	U	i	0.172	1.491	i	1.012	1.091	i	3.181	3.512	0.103	0.182	4.034	4.066	3.932	3.884	1.104	1.275	0.761	0.309	0.024	0.543
prr5l	LS	Both	gene34370	.	.	.	X	X	.	.	gene11746	.	.	.	X	.	.	.	e	0	3.253	i	1.984	2.939	i	7.278	7.61	0.564	-0.1	7.353	4.515	6.789	4.615	2.455	-0.943	2.322	0.311	-0.765	-0.794
rpl27	LS	Son	gene4077	M	.	.	.	X	.	.	gene8856	M	.	.	X	X	.	.	i	0	0	i	0	0.03	i	2.085	2.42	-0.089	-0.559	3.226	2.312	3.315	2.871	1.101	-2.197	-0.548	-0.021	-0.542	-0.433
hells	LS	unk	gene18479	M	.	.	.	.	.	U	gene15035	M	.	.	X	.	U	D	i	1.204	0.52	i	0.869	0	i	2.538	2.876	-0.387	-0.31	3.187	3.83	3.574	4.14	-1.151	-0.015	1.376	0.077	2.471	0.221
ahsa1	LS	Son	gene15450	M	.	.	.	.	.	.	gene14011	M	.	.	X	X	U	.	i	0.64	0.618	e	0.483	0.142	i	2.913	3.252	-0.134	-0.265	4.21	4.011	4.343	4.276	-0.021	0.088	0.405	0.03	0.979	0.24
ipo7	LS	Both	gene46861	M	.	.	X	.	.	.	gene19154	M	X	.	X	X	.	.	i	0.921	1.972	i	0.58	1.009	i	1.932	2.281	0.003	0.363	1.527	3.267	1.524	2.904	0.374	-0.169	-0.059	0.44	0.545	1.008
znf292	LS	Both	gene16779	M	.	.	X	X	U	.	gene13266	M	.	.	X	X	.	.	i	0	0.639	i	1.189	1.22	i	4.92	5.275	-0.485	0.08	5.385	5.784	5.869	5.704	-0.68	-1.043	1.736	0.311	2.009	0.638
acbd3	LS	Both	gene15895	M	X	X	X	.	U	.	gene11078	M	.	X	X	X	U	.	i	0.367	1.81	i	3.596	5.132	i	7.113	7.47	-2.16	-2.21	5.75	5.954	7.91	8.164	-0.064	-1.563	3.651	4.213	3.088	4.267
snx18	LS	Both	gene39884	M	X	X	X	X	.	D	gene35256	M	.	X	X	.	.	D	e	0.753	0	i	6.446	7.922	i	9.429	9.79	0.467	-0.086	8.444	8.962	7.977	9.048	-0.078	1.401	6.811	7.382	4.868	4.533
cadm1	LS	Both	gene35019	M	X	X	X	X	U	D	gene17083	M	.	X	X	X	D	.	i	0.835	0.81	i	3.17	3.013	i	4.846	5.215	-1.047	-0.081	4.293	4.22	5.34	4.301	1.277	0.699	2.471	1.084	1.581	1.118
depdc1	LS	unk	gene42782	M	.	.	.	X	U	.	gene50040	M	.	.	X	.	.	.	i	1.254	1.16	i	0.438	0	i	2.195	2.568	-1.175	0.715	1.716	2.937	2.891	2.222	-1.539	-4.139	1.897	0.474	1.341	1.524
tm9sf3	LS	Both	gene14632	M	X	X	X	X	U	.	gene12416	M	.	.	X	X	U	.	i	1.995	1.134	i	1.615	0.986	i	3.831	4.204	-0.109	-0.182	4.922	4.933	5.031	5.115	0.094	-1.119	1.408	0.669	1.395	0.964
gapdh	LS	Both	gene4780	M	.	X	X	.	U	D	gene16557	M	.	X	X	.	U	.	i	1.807	1.81	i	3.131	2.657	i	3.601	3.99	-0.299	-1.08	2.908	2.576	3.207	3.657	1.875	1.506	1.808	1.548	0.96	0.513
ubxn7	LS	Both	gene16295	M	.	.	X	.	U	.	gene2472	M	.	.	X	.	U	.	i	0.738	0.81	i	1.144	0.527	i	4.743	5.133	-0.161	-0.407	5.51	5.757	5.671	6.164	-0.976	-0.15	1.94	1.319	1.668	1.846
lsm3	LS	Both	gene16278	M	X	.	X	X	.	.	gene5302	M	.	.	X	X	.	.	i	0.962	0.81	i	0.877	1.206	i	4.883	5.273	-0.018	-0.318	5.294	5.739	5.312	6.057	-2.096	-0.656	0.322	0.31	1.467	1.356
gnas	LS	Both	gene44113	M	.	X	X	X	U	D	gene41445	M	.	X	X	X	U	D	i	0.641	0.315	i	3.858	3.169	i	4.657	5.051	-0.728	-0.694	4.205	4.864	4.934	5.559	0.118	0.589	3.705	3.476	2.097	2.139
slc39a9	LS	Both	gene50105	M	.	.	X	.	U	.	gene8172	M	.	.	X	X	.	D	i	1.603	1.812	i	0.848	0.369	i	3.993	4.392	-0.939	-0.021	4.003	4.854	4.942	4.875	0.718	1.661	-0.02	1.6	1.573	0.095
b3gnt2	LS	Both	gene18368	M	.	X	X	X	U	D	gene34842	M	X	.	X	X	.	.	i	0.981	4.838	i	3.233	1.837	i	5.433	5.833	-0.275	-0.462	6.211	5.414	6.486	5.876	0.897	1.927	3.552	-0.103	1.641	-0.909
mix1	LS	Both	gene40654	.	.	X	X	X	U	.	gene6878	.	.	X	X	X	.	D	e	0	3.395	e	7.672	8.39	e	12.14	12.546	-0.29	-0.377	11.562	12.098	11.852	12.476	3.771	0.6	5.076	7.278	2.531	5.702
irs4	LS	Both	gene19663	M	.	X	X	X	U	D	gene48376	M	.	X	X	X	.	D	i	0	1.49	i	5.803	6.837	i	8.099	8.508	-1.001	-0.211	7.903	8.568	8.904	8.779	-0.86	0.387	4.917	6.285	4.775	5.381
extl3	LS	Both	gene36629	M	.	X	X	X	.	D	gene19091	M	.	X	X	X	.	D	i	1.396	0	i	3.052	2.033	i	4.204	4.616	0.064	-0.591	4.436	4.043	4.373	4.634	0.497	1.367	3.013	2.717	1.183	0.733
fgfr2	LS	Both	gene44510	M	X	X	X	X	U	D	gene14780	.	.	X	X	X	U	D	i	0	3.395	i	7.078	7.173	i	9.768	10.183	0.003	-0.7	7.436	7.903	7.434	8.603	2.795	3.689	7.268	7.218	3.842	2.897
ddx18	LS	Both	gene14177	M	.	.	X	X	D	.	gene48285	M	.	.	X	.	U	.	i	1.68	0.895	i	0.234	1.006	i	3.962	4.382	1.016	-0.123	4.324	4.474	3.308	4.597	0.7	0.726	-0.554	-0.203	0.536	0.289
ubap2	LS	Both	gene35448	M	X	X	X	X	U	D	gene19043	M	.	.	X	X	.	.	i	2.189	0.722	i	2.201	1.4	i	3.984	4.406	-0.453	-0.215	5.117	5.124	5.57	5.339	0.998	-0.324	2.415	0.795	1.531	0.907
celf1	LS	Both	gene47449	M	X	X	X	X	U	.	gene43370	M	.	.	X	.	U	.	i	1.753	0.093	i	0.945	0.445	i	3.172	3.596	-1.185	-1.314	2.155	2.241	3.34	3.555	0.276	-0.31	0.44	-0.173	0.116	-0.396
nap1l1	LS	Both	gene3398	M	.	X	X	.	.	D	gene2968	M	.	X	X	.	.	D	i	0.199	0.672	i	1.725	2.417	i	3.841	4.268	0.442	-0.046	5.704	5.816	5.262	5.862	0.313	-0.695	1.473	2.444	1.498	2.388
ubald2	LS	unk	gene7608	M	.	.	.	X	.	D	gene49104	M	X	X	X	X	U	D	i	0.812	1.535	i	4.571	3.62	i	4.542	4.969	-1.025	-1.178	3.787	4.095	4.812	5.273	2.285	0.785	3.889	2.815	2.081	1.499
tcf7l1	LS	Both	gene805	M	.	X	X	X	D	D	gene43592	M	X	X	X	X	D	D	i	0.867	1.962	i	5.184	5.966	i	6.807	7.234	0.892	0.692	7.167	7.136	6.275	6.444	1.367	1.185	5.241	6.093	3.306	4.114
ccne2	LS	Both	gene11302	M	.	X	X	X	D	D	gene41395	M	.	X	X	X	D	D	i	1.074	0.918	i	4.933	5.039	i	7.01	7.437	0.818	2.348	6.748	7.907	5.93	5.559	1.774	1.945	4.767	4.329	2.885	2.228
mcl1	LS	Both	gene42816	M	.	X	X	X	.	D	gene8056	M	.	X	X	.	D	D	i	0.81	1.811	i	4.357	4.757	i	7.544	7.972	-0.448	1.516	7.657	8.646	8.104	7.13	0.507	1.189	2.864	4.18	2.239	2.409
itm2a	LS	Both	gene13828	M	X	X	X	X	D	D	gene13371	M	.	.	X	X	U	.	i	1.702	0	i	2.995	0	i	4.91	5.342	1.455	-0.172	4.439	5.153	2.984	5.324	1.325	-2.302	3.113	1.462	1.328	1.671
c19orf47	LS	Both	gene35590	M	.	.	X	.	.	.	gene41652	M	.	.	X	X	.	.	i	0	1.487	i	0.038	0.567	i	4.425	4.857	0.188	0.153	5.406	5.439	5.218	5.286	-1.194	-1.096	-2.004	1.187	0.574	1.204
ppig	LS	Both	gene9769	M	.	.	X	X	D	.	gene11700	M	.	.	X	X	.	.	i	0.663	1.111	i	1.042	1.249	i	3.5	3.935	0.78	0.128	4.589	4.753	3.809	4.625	-0.399	-1.657	0.31	0.969	0.325	1.865
nucks1	LS	Both	gene12108	M	.	X	X	X	U	.	gene11316	M	.	X	X	X	.	D	i	0.811	0	i	3.675	2.639	i	6.607	7.044	-0.856	0.282	6.353	7.656	7.209	7.374	0.163	0.158	2.248	2.159	2.159	1.413
lsm14b	LS	Both	gene10767	M	.	X	X	X	.	D	gene2593	M	.	X	X	.	.	.	i	0	0.804	i	3.846	3.541	i	3.477	3.915	0.284	-0.476	4.568	3.338	4.284	3.814	0.625	1.161	3.307	2.762	2.589	1.667
smu1	LS	Both	gene20152	M	X	.	X	X	.	.	gene795	M	X	.	X	X	U	.	i	1.464	1.616	i	0	0	i	3.655	4.095	-0.02	-0.308	4.785	5.117	4.806	5.425	-0.142	-0.915	-0.383	-0.272	1.601	1.446
eif3m	LS	Both	gene45607	M	X	.	X	.	.	.	gene3207	M	.	.	X	.	.	.	i	2.25	1.117	i	1.258	0.689	i	3.778	4.218	-0.415	0.053	3.852	4.758	4.267	4.705	-1.21	-0.3	1.883	0.804	0.897	1.088
usp37	LS	Both	gene1916	M	.	X	X	.	U	.	gene1781	M	.	.	X	.	U	.	i	0	0.782	i	2.282	0.808	i	3.382	3.822	-1.41	-0.586	2.919	4.288	4.329	4.874	-0.477	-0.539	1.543	0.699	2.096	1.191
dpy30	LS	Lon	gene13849	M	.	.	X	X	.	.	gene14431	M	.	.	.	X	.	.	i	1.07	0	i	0.686	0	i	3.268	3.718	-0.147	-0.599	3.379	4.334	3.526	4.933	0.11	-0.365	-0.189	1.64	0.58	2.086
aplp2	LS	Both	gene14841	M	.	X	X	X	U	D	gene13029	M	X	X	X	X	.	D	i	0.81	1.429	i	3.247	2.217	i	4.652	5.11	-0.741	0.081	4.933	5.895	5.674	5.813	0.315	0.961	2.805	1.453	1.922	1.141
paxbp1	LS	Both	gene12766	M	.	X	X	X	U	D	gene8351	M	.	X	X	X	U	D	i	0.567	0.309	i	3.873	3.973	i	5.53	5.997	-1.139	-0.133	5.11	6.429	6.249	6.562	-0.478	0.794	3.654	3.881	2.936	1.897
usp10	LS	Both	gene43763	M	X	.	X	X	.	U	gene5779	M	X	.	X	X	.	.	i	1.155	1.185	i	0.018	0.062	i	2.675	3.144	0.032	-0.067	3.538	4.287	3.506	4.354	-1.118	-0.231	0.261	1.196	1.272	0.816
lin28a	LS	Both	gene14646	.	.	.	X	X	D	.	gene16	.	.	X	X	X	D	D	i	0.367	0	i	2.806	4.199	i	6.93	7.398	3.558	2.462	9.346	9.085	5.787	6.623	4.037	4.151	1.757	3.903	0	0.826
rps16	LS	Both	gene11891	M	.	.	X	X	.	.	gene5344	M	.	.	X	X	.	.	i	0.591	0	i	0	1.102	i	4.345	4.815	-0.762	-0.068	4.41	5.357	5.172	5.425	0.186	-0.57	-2.01	0.061	-0.232	0.684
ywhab	LS	Both	gene5480	M	.	X	X	X	U	.	gene17923	M	.	.	X	X	.	.	e	0.27	0.216	i	2.809	1.835	i	4.887	5.364	-0.943	-0.184	4.84	5.879	5.783	6.063	-0.737	-0.278	1.678	1.685	2.62	1.231
sin3a	LS	Both	gene6407	M	.	X	X	X	U	D	gene13514	M	.	X	X	.	U	D	i	0.768	0.879	i	2.4	3.797	i	4.017	4.508	-0.512	-0.58	4.129	5.179	4.641	5.759	0.88	0.496	1.905	2.631	1.515	2.59
arl5c	LS	Both	gene15843	M	.	X	X	.	D	D	gene45471	M	X	X	X	.	D	D	i	1.809	0	i	4.514	5.191	i	6.842	7.336	1.329	1.177	8.582	8.274	7.253	7.097	2.121	1.771	4.537	4.597	3.028	3.679
mybl2	LS	Both	gene10094	M	X	X	X	X	U	D	gene39136	M	X	.	X	X	.	.	i	1.421	1.955	i	1.813	0.836	i	1.537	2.033	-1.11	-0.393	1.787	2.408	2.896	2.801	1.135	-0.123	1.534	-0.116	0.688	1.095
zfta	LS	Both	gene3709	M	.	X	X	X	.	.	gene34653	M	X	X	X	.	.	.	i	2.134	2.397	i	5.479	4.589	i	6.623	7.12	-0.972	-0.685	5.513	7.461	6.485	8.146	0.308	0.373	4.773	4.935	3.552	4.348
hnrnpa2b1	LS	Both	gene6979	M	.	X	X	X	D	D	gene2189	M	.	X	X	X	D	D	i	0.003	1.81	i	4.428	5.284	i	7.781	8.281	1.038	1.406	8.455	8.612	7.418	7.206	1.931	2.308	4.653	5.051	3.095	3
hand2	LS	Both	gene452	.	.	X	X	.	.	.	gene50650	.	.	X	X	.	.	D	e	2.811	2.396	i	5.506	7.337	i	6.343	6.842	-0.58	0.013	5.156	5.246	5.736	5.233	2.093	3.539	2.776	6.511	1.637	3.116
polr2f	LS	Both	gene42561	M	.	.	X	.	.	.	gene49009	M	X	.	X	X	.	.	i	0.109	2.395	i	0.797	0.333	i	3.617	4.118	-0.421	-0.394	3.405	4.947	3.826	5.341	-0.718	-2.861	0.491	-0.1	0.411	1.558
ppp4r3a	LS	Both	gene4582	M	.	X	X	.	U	D	gene4361	M	X	X	X	.	U	D	i	0.52	1.731	i	4.129	2.104	i	3.816	4.326	-1.194	-0.578	5.044	5.233	6.238	5.811	-0.674	-0.213	4.561	2.616	3.687	1.852
abcf3	LS	Both	gene5949	M	.	.	X	.	.	.	gene6363	M	.	.	X	X	.	.	i	1.075	1.033	i	0	0	i	3.797	4.31	0.176	-0.207	5.186	5.239	5.01	5.446	-2.853	-0.477	1.169	-0.175	1.23	1.368
hnrnpu	LS	Both	gene35541	M	.	X	X	X	.	D	gene512	M	.	X	X	X	.	D	i	0.974	0.883	i	4.096	5.159	i	8.028	8.543	-0.197	0.515	7.752	8.912	7.95	8.397	0.485	0.417	4.401	5.332	3.097	4.228
rad51	LS	Lon	gene2381	M	.	.	X	X	.	.	gene42808	M	.	.	.	.	.	.	i	0.893	0.811	e	0.405	0	i	1.954	2.471	-0.112	0.055	2.169	2.981	2.28	2.926	0.621	-0.086	0.245	0.536	0.152	0.827
habp4	LS	unk	gene16392	M	.	.	.	.	.	.	gene13425	M	.	.	X	.	.	.	i	1.142	0.732	i	0.161	0.838	i	2.006	2.523	-0.349	-0.827	2.035	2.075	2.384	2.901	-0.51	-0.099	-0.237	0.499	0.841	0.506
hmgb2	LS	Both	gene43861	M	.	X	X	X	.	D	gene3081	M	X	X	X	X	.	D	i	0	2.948	i	4.096	4.322	i	7.258	7.777	-0.314	-0.28	7.72	7.919	8.034	8.199	-0.009	0.795	4.112	4.7	3.856	3.79
prmt1	LS	Both	gene9411	M	.	X	X	X	.	D	gene8191	M	X	X	X	X	D	D	i	0.266	1.588	i	4.59	5.2	i	7.751	8.273	0.456	0.477	8.255	8.634	7.799	8.157	0.505	0.227	3.887	4.542	3.327	4.008
sh3bp4	LS	Both	gene14497	M	.	X	X	X	U	D	gene20316	M	.	X	X	X	.	D	i	1.81	0.225	i	5.455	5.321	i	5.969	6.493	-0.959	0.446	5.923	6.719	6.881	6.273	1.564	3.821	4.836	5.336	2.226	1.677
pcdh10	LS	Both	gene3393	.	X	X	X	X	U	D	gene41338	.	X	X	X	.	U	D	i	5.253	5.837	i	9.517	9.313	i	9.209	9.742	-2.841	-1.955	5.834	7.367	8.675	9.323	2.22	-0.089	9.059	7.934	5.883	5.749
fam76b	LS	Both	gene19165	M	X	X	X	X	.	.	gene18377	M	.	.	X	X	U	.	i	1.812	0.62	i	1.501	1.886	i	3.751	4.287	0.025	-1.511	4.604	4.455	4.579	5.966	-1.095	-0.943	0.552	-0.683	1.617	2.754
sppl3	LS	Both	gene3100	M	X	X	X	X	U	D	gene2380	M	.	X	X	X	D	D	i	2.032	0.746	i	3.518	3.296	i	4.36	4.898	-0.317	1.033	5.123	6.108	5.44	5.075	1.07	0.38	3.115	3.717	2.092	2.701
znf839	LS	Both	gene637	M	.	.	X	.	.	.	gene4751	M	X	.	X	.	U	.	e	0	0.854	i	0.105	0	i	3.866	4.404	0.061	0.655	5.332	5.578	5.271	4.923	-1.149	-1.984	1.416	-1.267	1.361	1.095
calm2	LS	Both	gene16771	M	.	X	X	X	.	.	gene3485	M	.	X	X	.	U	.	i	0.955	2.227	i	2.751	3.27	i	4.436	4.977	-1.329	-2.004	3.185	2.758	4.513	4.762	0.523	0.468	2.318	2.176	2.061	2.179
ranbp1	LS	Both	gene4544	M	X	.	X	.	.	.	gene9972	M	.	.	X	.	.	.	i	2.386	0.394	i	0	0	i	2.116	2.662	-0.242	-0.203	3.664	4.215	3.906	4.418	-0.318	-0.26	-0.797	-0.627	0.624	-0.226
bix1.1	LS	Both	gene6547	.	.	X	X	.	.	D	gene1452	.	X	X	X	.	.	D	e	0	4.838	e	4.361	6.564	e	10.476	11.026	0.261	-0.236	10.849	10.71	10.588	10.946	2.408	3.667	4.56	4.757	2.673	1.637
nog	LS	Both	gene11303	.	X	.	X	X	.	.	gene7513	M	.	X	X	.	.	.	e	1.432	0	e	0.856	1.692	e	2.232	2.787	-0.062	0.137	1.58	2.528	1.642	2.391	0.707	0.3	0.424	1.224	-0.238	0.481
foxn3	LS	Both	gene8996	M	.	X	X	X	U	D	gene7563	M	X	X	X	X	U	D	i	0.607	2.546	i	4.553	2.965	i	4.599	5.156	0.154	-1.025	5.169	5.254	5.016	6.28	2.274	0.599	3.966	3.072	1.975	1.916
eif4enif1	LS	Both	gene6548	M	.	.	X	X	.	.	gene10718	M	.	.	X	.	.	.	i	1.034	0.709	e	0	0	i	1.479	2.038	-0.428	-0.584	2.616	2.661	3.044	3.244	0.168	0.15	-0.042	-0.333	-0.047	-0.153
rpl6	LS	Both	gene2290	M	.	.	X	X	.	.	gene6704	M	.	.	X	X	.	.	i	1.183	1.448	e	0.229	0	i	2.609	3.169	0.183	-0.371	3.367	3.904	3.185	4.275	-0.433	-0.379	0.325	0.117	0.391	-0.053
skil	LS	Both	gene13862	M	.	X	X	X	.	D	gene12607	M	X	X	X	X	.	D	i	0	1.151	i	3.905	1.645	i	4.961	5.522	0	-0.398	5.679	5.504	5.679	5.902	3.064	1.185	2.637	2.113	1.084	0.151
clk3	LS	Both	gene34885	M	.	.	X	X	.	.	gene9145	M	.	.	X	X	U	.	i	0.59	0.148	i	0.316	1.294	i	3.718	4.281	-0.021	-0.405	5.171	5.042	5.192	5.447	-1.406	-1.125	0.89	0.785	1.091	1.438
ddx6	LS	Both	gene15717	M	X	.	X	X	.	.	gene14340	M	X	.	X	X	.	.	i	0.506	1.4	i	0	0	i	2.613	3.179	-0.204	0.083	3.516	3.88	3.72	3.797	-0.784	-0.683	0.43	0.321	1.505	1.757
fubp1	LS	Both	gene13196	M	X	.	X	X	.	.	gene19206	M	X	X	X	X	U	D	i	1.104	2.516	i	0.519	1.71	i	5.271	5.841	0.279	-0.545	6.268	5.991	5.988	6.536	-0.667	-0.296	-1.063	1.345	0.748	1.56
morf4l1	LS	Both	gene44103	M	X	X	X	X	.	.	gene35358	M	.	X	X	X	U	D	i	2.269	1.268	i	2.259	2.676	i	3.82	4.39	-0.161	-0.299	4.587	4.701	4.749	5	0.144	0.631	1.428	2.307	1.598	1.581
smarce1	LS	Both	gene16052	M	.	.	X	X	U	.	gene4808	M	X	.	X	X	U	.	i	0.693	2.334	i	0	0.163	i	4.274	4.86	-0.436	-0.612	4.712	4.804	5.149	5.416	-0.08	-1.244	-0.163	-0.36	1.14	1.259
cdc73	LS	Both	gene11285	M	X	X	X	X	U	.	gene12638	M	.	.	X	X	.	.	i	0.979	0.164	i	1.405	0	i	4.382	4.974	-0.152	-0.547	3.51	4.323	3.662	4.869	-0.194	-0.491	1.273	1.319	1.675	2.569
hmgn2	LS	Both	gene6351	M	X	X	X	X	U	D	gene40812	M	X	X	X	X	U	D	i	2.396	2.341	i	3.398	4.146	i	5.734	6.327	-0.884	-0.079	5.891	6.697	6.775	6.776	0.307	0.678	2.87	3.489	2.22	2.602
eif4b	LS	Both	gene8804	M	X	.	X	X	.	D	gene38978	M	.	X	X	X	.	.	i	1.304	1.188	i	1.029	2.132	i	3.976	4.591	-0.057	-0.405	4.52	5.182	4.577	5.587	-0.076	0.208	1.206	2.242	1.164	1.865
isg20l2	LS	unk	gene6181	M	.	.	X	X	.	.	gene11246	M	.	.	.	X	.	.	i	0.81	0	i	1.156	4.731	i	5.378	5.997	-0.256	0	5.963	6.821	6.219	6.822	-1.388	3.439	-0.685	0	1.678	0
ncl	LS	Both	gene41610	M	.	X	X	X	U	D	gene11052	M	X	X	X	X	U	D	i	0	1.862	i	3.809	3.86	i	6.225	6.844	-0.77	-0.683	7.723	7.398	8.493	8.081	-0.305	0.584	3.634	3.409	2.412	2.952
mdh1	LS	Both	gene12194	M	.	X	X	X	.	.	gene17035	M	.	.	X	.	.	.	i	0.056	2.132	i	2.165	0.587	i	3.44	4.061	0.364	0.361	2.44	3.974	2.076	3.613	1.851	-1.487	1.394	0.061	0.085	1.604
ppwd1	LS	Both	gene37819	M	.	.	X	X	U	.	gene2477	M	X	.	X	.	U	.	i	0.808	1.904	i	0	0.673	i	3.389	4.014	-1.154	-0.414	3.576	4.499	4.73	4.913	-1.33	0.061	0.516	0.7	2.04	1.223
vgll4	LS	Both	gene14714	M	.	X	X	X	U	D	gene1175	M	.	X	X	X	U	D	i	0	1.395	i	4.142	3.709	i	5.421	6.049	-0.979	-0.732	4.926	6.004	5.905	6.735	1.056	1.792	3.814	3.855	2.579	2.086
cbx2	LS	unk	gene11813	M	.	.	X	.	.	.	gene41028	M	.	.	.	.	.	.	i	1.976	2.622	i	0.975	2.909	i	3.498	4.128	-0.902	-0.738	3.203	4.868	4.104	5.606	-2.109	-0.986	-1.489	1.645	1.588	1.678
ube2e3	LS	Both	gene20352	M	.	.	X	X	U	.	gene17622	M	X	.	X	X	U	D	i	0.927	1.515	i	0.361	0.841	i	2.918	3.555	-0.315	-0.668	3.815	3.506	4.13	4.175	0.436	-0.266	-0.241	1.242	0.147	0.499
pum1	LS	Both	gene4383	M	.	.	X	X	.	.	gene8780	M	X	.	X	X	U	D	i	0.927	1.244	i	0.835	0.987	i	3.263	3.901	0.459	-0.268	4.357	4.445	3.898	4.713	-0.6	-0.92	0.324	1.318	0.576	1.246
tpm3	LS	Both	gene35741	M	.	X	X	.	U	.	gene5900	M	.	X	X	.	.	D	i	0.812	0.431	i	3.352	4.288	i	5.751	6.39	-0.879	-0.453	5.351	6.596	6.229	7.049	-0.184	0.118	2.802	4.295	2.947	3.535
srsf7	LS	Both	gene16866	M	X	X	X	.	D	D	gene2965	M	X	X	X	X	.	D	i	1.287	1.888	i	5.046	5.679	i	7.972	8.611	0.653	0.28	8.59	8.787	7.937	8.507	1.865	0.771	3.687	5.406	2.772	4.359
oat	LS	Both	gene10844	M	.	X	X	.	D	D	gene18433	M	.	X	X	.	U	D	i	0.545	0.492	i	3.867	2.879	i	4.598	5.239	0.821	0.015	4.472	5.116	3.65	5.101	-0.022	1.278	3.079	3.423	2.047	1.587
snx27	LS	Both	gene11057	M	.	.	X	X	U	.	gene16876	M	.	.	X	X	.	.	i	1.449	1.225	i	1.132	1.204	i	3.55	4.196	-0.466	-0.465	4.1	4.756	4.566	5.221	0.138	0.287	1.073	-0.358	0.738	0.419
sarnp	LS	Both	gene48638	M	X	.	X	X	U	.	gene5836	M	.	.	X	X	U	.	i	1.096	0.226	i	0.605	0.176	i	3.378	4.025	-0.388	-0.691	4.434	4.22	4.821	4.912	-0.735	-0.977	0.625	0.058	1.86	0.9
eif4a1	LS	Both	gene17828	M	X	X	X	X	U	D	gene19373	M	X	X	X	X	U	D	i	2.032	3.736	i	2.472	3.214	i	3.463	4.115	-1.945	-1.14	2.095	3.359	4.04	4.499	-0.235	0.38	1.962	2.622	1.675	2.222
kpna3	LS	Both	gene9003	M	.	X	X	.	.	D	gene14416	M	.	X	X	X	U	D	i	0.857	0.363	i	2.95	3.515	i	5.135	5.792	-0.275	-0.569	5.132	6.006	5.407	6.574	0.176	-0.074	2.957	3.183	2.649	2.92
tead4	LS	Both	gene13450	M	X	X	X	X	U	D	gene16174	M	X	X	X	X	D	D	i	0.81	2.588	i	8.584	5.962	i	8.024	8.685	-0.025	2.357	9.039	9.263	9.064	6.906	2.285	2.63	8.668	5.679	6.614	3.11
emc7	LS	Both	gene18249	M	.	.	X	X	.	.	gene11942	M	X	.	X	X	.	.	i	0	4.839	i	0.939	2.324	i	5.323	5.989	0.048	-0.58	5.447	6.974	5.399	7.553	-1.268	-1.973	-0.694	0.316	1.541	2.669
sec61a1	LS	Both	gene4180	M	.	.	X	X	.	.	gene14349	M	.	.	X	X	.	.	i	1.659	1.81	i	0	1.098	i	5.789	6.466	0.216	0.242	6.729	7.242	6.513	7.001	-1.145	0.15	-0.277	2.317	1.832	1.962
znf281	LS	Both	gene13257	M	.	X	X	X	U	.	gene14774	M	.	.	X	X	U	.	i	0.394	0.81	i	3.72	2.679	i	7.136	7.814	-0.714	-1.065	7.202	6.824	7.916	7.888	-1.537	2.503	2.819	2.308	2.969	0.194
smad1	LS	Both	gene50842	M	X	X	X	X	U	D	gene20185	M	X	X	X	X	U	D	i	1.29	2.12	i	3.081	3.469	i	4.299	4.976	-1.742	-1.046	4.72	4.646	6.463	5.692	-0.012	0.36	3.415	3.64	2.378	1.908
zfp36l2	LS	Both	gene12439	M	X	X	X	X	D	D	gene11893	M	.	X	X	X	D	D	i	1.81	0.367	i	7.142	6.676	i	8.346	9.029	1.664	0.633	9.415	10.209	7.751	9.576	3.125	2.827	5.407	5.928	3.093	3.899
trhde	LS	Son	gene9127	.	.	.	.	.	.	U	gene3313	.	.	X	X	.	.	D	e	1.002	0.671	e	0.278	0.899	e	0.5	1.198	0.299	-0.298	1.521	0.459	1.223	0.756	-3.329	1	0.013	0.678	1.4	-0.444
gsc	LS	Both	gene15635	.	.	X	X	X	U	.	gene10355	.	.	X	X	X	.	D	e	3.253	0	i	5.581	7.306	i	9.015	9.716	-1.216	-0.479	8.283	9.445	9.499	9.924	3.049	0.688	3.756	7.695	0	5.527
peli1	LS	Both	gene12440	M	.	.	X	X	.	.	gene20402	M	.	X	X	X	.	.	e	0	0.182	i	1.542	2.783	i	4.468	5.169	-0.197	0.115	5.084	5.136	5.281	5.02	-0.239	1.344	1.594	1.921	1.453	0.942
mespa	LS	Both	gene17572	.	.	X	X	X	.	.	gene3869	.	.	.	X	X	.	.	i	0	0	e	6.294	1.793	e	6.24	6.942	-1.195	-1.96	6.125	5.236	7.32	7.196	1.464	0	4.568	0	0	0
khdrbs1	LS	Both	gene12803	M	.	X	X	X	U	D	gene18071	M	X	X	X	X	.	D	i	0.002	1.178	i	4.189	2.546	i	6.6	7.303	-2.119	-0.16	5.306	7.785	7.425	7.945	-0.647	0.79	3.687	2.315	2.344	1.46
cacybp	LS	Both	gene10819	M	.	.	X	.	.	.	gene15552	M	.	X	X	X	U	D	i	3.253	3.809	i	1.343	3.237	i	4.587	5.295	-0.944	-1.13	3.402	4.982	4.346	6.112	1.49	2.114	1.524	3.254	-1.392	2.091
actg1	LS	Son	gene50982	M	.	.	.	.	.	.	gene5277	M	.	X	X	.	U	.	i	1.545	2.616	i	1.311	2.579	i	2.268	2.989	-0.105	-1.4	2.925	3.743	3.031	5.143	0.288	2.398	-0.097	1.907	0.416	0.879
igf2bp3	LS	Both	gene18830	M	X	X	X	X	U	D	gene8965	M	X	X	X	X	U	D	i	1.74	1.907	i	3.601	2.789	i	3.736	4.462	-0.288	-0.418	4.532	4.997	4.819	5.415	0.547	0.3	3.714	2.646	2.856	2.324
gata4	LS	Both	gene2026	.	.	X	X	X	U	D	gene14171	.	.	X	X	X	U	D	i	0.368	0.367	i	7.88	7.953	i	9.003	9.734	-2.089	-2.282	8.196	8.062	10.284	10.344	0.121	-1.312	8.595	8.833	7.059	6.238
tgif2	LS	Both	gene18148	M	.	X	X	X	D	D	gene12949	M	.	X	X	.	D	D	i	1.395	1.81	i	6.01	5.734	i	7.572	8.304	0.893	5.026	7.84	8.596	6.947	3.57	1.836	2.867	5.863	5.162	3.503	2.516
kif22	LS	Both	gene6790	M	.	.	X	X	U	.	gene10307	M	X	.	X	X	.	.	i	1.002	2.224	i	0	0	i	2.211	2.953	-2.065	-0.384	1.517	3.177	3.582	3.56	-0.741	0.816	0.311	-1.317	1.138	-0.546
agpat3	LS	Both	gene5727	M	.	.	X	X	.	.	gene13045	M	.	.	X	X	U	.	i	0.004	0.586	i	0	0.91	i	3.149	3.892	-0.03	-0.709	3.007	4.291	3.037	5	0.01	2.407	0.103	1.896	0.669	-0.919
ywhaq	LS	Both	gene2969	M	.	X	X	.	.	D	gene1467	M	.	X	X	.	U	D	i	0.673	1.362	i	5.011	4.86	i	6.372	7.118	0.533	-1.971	7.373	6.391	6.84	8.362	1.685	0.189	4.035	4.891	2.892	3.209
phldb3	LS	Both	gene15315	M	.	X	X	X	.	D	gene13444	.	.	X	X	X	.	D	e	0	1.074	i	7.012	7.156	i	8.694	9.446	0.558	-0.34	9.411	9.636	8.853	9.976	2.379	1.054	7.124	7.547	4.68	5.533
papola	LS	Both	gene18527	M	X	.	X	X	U	.	gene13497	M	.	.	X	X	.	.	i	1.224	0.464	i	0.837	0.715	i	3.484	4.237	-0.532	-0.315	4.654	5.149	5.185	5.464	-0.477	-0.54	1.203	0.678	1.657	1.093
rps8	LS	Both	gene36836	M	.	.	X	X	D	.	gene4684	M	X	.	X	X	U	.	i	0.717	1.853	i	0.576	0.976	i	3.887	4.645	0.737	0.146	4.589	4.777	3.852	4.631	-0.083	-0.489	0.455	0.523	0.614	1.01
fst	LS	Both	gene813	.	.	X	X	X	U	D	gene17766	.	.	.	X	X	.	.	i	0	0	i	8.811	4.086	i	6.348	7.108	-1.249	0.247	5.491	6.032	6.739	5.785	1.275	-0.943	9.762	2.756	6.634	1.637
atp1b3	LS	Both	gene4906	M	X	X	X	X	U	D	gene16064	M	.	X	X	X	U	D	i	1.81	0.488	i	5.626	6.876	i	7.195	7.962	-0.492	-0.468	6.117	6.91	6.609	7.377	2.253	1.537	4.551	6.603	2.461	4.814
srrt	LS	Both	gene40564	M	X	.	X	X	U	.	gene46662	M	X	.	X	.	.	D	i	1.588	5.252	i	1.061	0	i	3.989	4.768	-0.157	-0.707	4.838	5.98	4.996	6.686	-0.566	-0.127	1.125	2.626	1.344	3.415
ncoa5	LS	Both	gene7132	M	.	X	X	X	D	D	gene3376	M	.	.	X	X	U	.	i	1.133	0.891	i	1.73	0.906	i	3.756	4.536	0.518	-0.5	4.234	4.947	3.715	5.447	0.118	-0.206	2.198	1.486	1.162	0.809
rpl27a	LS	Both	gene9256	M	.	.	X	X	.	.	gene20511	M	.	.	X	X	.	.	i	0	0	e	0	0.281	i	2.992	3.773	0.148	-0.09	3.873	4.05	3.725	4.14	-1.164	-0.795	0.004	0.484	0.015	0.883
nsd2	LS	Both	gene18274	M	X	.	X	X	.	.	gene20506	M	X	.	X	X	.	.	i	1.598	1.488	i	0.398	0.613	i	1.464	2.255	0.137	-0.157	1.895	2.582	1.758	2.739	0.344	-0.281	0.87	0.583	0.27	0.699
crx	LS	Both	gene12082	.	.	X	X	X	.	D	gene14730	.	.	X	X	X	D	D	e	0	0.367	e	6.899	5.924	i	7.545	8.338	0.104	1.918	7.937	8.364	7.833	6.446	2.912	3.484	5.221	4.642	3.419	1.898
ets2	LS	Both	gene2114	M	.	X	X	X	.	D	gene209	M	X	X	X	.	.	D	i	1.142	2.395	i	5.625	6.029	i	7.564	8.357	-0.334	0.449	7.911	7.94	8.245	7.491	0.758	1.663	5.21	5.559	4.177	3.557
ccnb3	LS	Both	gene5379	M	.	X	X	X	.	.	gene17012	M	.	X	X	X	D	D	i	1.81	0.003	i	3.122	2.538	i	4.359	5.157	-1.033	-0.704	3.949	5.841	4.982	6.545	1.342	0.48	2.102	1.994	0.942	1.354
rpl13a	LS	unk	gene16349	M	.	.	X	.	.	.	gene37708	M	.	.	.	X	.	.	i	0.587	1.612	i	1.349	0.847	i	3.374	4.184	0.166	-0.281	3.206	4.444	3.041	4.724	1.781	-0.851	0.712	-0.416	0.377	1.233
bsg	LS	Both	gene8876	M	.	X	X	X	D	D	gene43891	M	X	X	X	X	D	D	i	0.91	2.35	i	3.2	6.413	i	7.122	7.944	1.898	1.083	7.122	7.44	5.225	6.358	1.691	3.89	1.421	6.473	0.965	2.139
cdk1	LS	Both	gene11162	M	.	X	X	X	D	.	gene8902	M	.	X	X	X	D	.	e	0.015	0	i	2.44	1.532	i	3.916	4.74	-1.152	-1.078	3.762	4.255	4.914	5.333	0.611	-0.263	1.776	1.088	1.887	1.598
rab40c	LS	Both	gene4822	M	.	X	X	X	U	.	gene5521	M	X	X	X	X	.	D	i	0.325	3.395	i	1.559	3.729	i	5.202	6.027	-0.001	0.056	5.385	5.935	5.386	5.879	0.704	1.818	0.967	3.228	0.091	1.198
ywhae	LS	Both	gene15793	M	.	X	X	X	U	D	gene13105	M	.	X	X	X	U	.	i	0.468	0	i	2.119	2.441	i	5.313	6.143	-0.497	-0.525	5.152	5.988	5.65	6.514	-0.153	0.027	1.435	2.236	1.569	2.156
zic1	LS	Both	gene16570	.	X	X	X	X	D	D	gene36199	.	.	X	X	X	D	D	i	4.837	3.252	i	8.887	9.28	i	8.768	9.617	0.37	2.066	8.849	10.529	8.479	8.463	2.759	1.676	8.477	9.774	6.23	7.057
hnrnpa1	LS	Both	gene36495	M	X	X	X	X	D	D	gene14449	M	X	X	X	X	.	D	i	2.599	2.64	i	4.844	6.148	i	7.996	8.846	0.94	0.482	7.84	9.326	6.9	8.844	1.603	1.747	4.895	5.704	2.962	4.182
ctdspl2	LS	Both	gene15802	M	.	.	X	X	.	.	gene13988	M	X	X	X	X	.	D	i	1.568	1.395	i	1.409	1.813	i	2.842	3.692	-0.069	0.216	3.613	4.455	3.682	4.239	0.5	-0.186	1.597	2.33	0.188	1.825
lgals3	LS	unk	gene10644	M	.	.	.	X	U	D	gene37640	.	.	X	X	.	.	.	e	0	1.227	i	3.022	6.876	i	6.16	7.015	-2.053	-1.124	4.951	7.049	7.004	8.173	1.445	0.285	3.122	5.465	2.903	4.864
myef2	LS	Both	gene3517	M	.	X	X	X	D	D	gene9447	M	.	X	X	X	.	D	i	0.771	0.489	i	3.408	3.889	i	6.892	7.752	1.043	0.496	7.012	8.119	5.97	7.623	2.448	0.765	2.885	3.28	0.945	1.969
ahcyl2	LS	Both	gene9310	M	.	X	X	X	.	D	gene6041	M	X	X	X	X	U	D	i	0.489	1.883	i	4.227	4.106	i	4.428	5.289	-0.284	0.316	4.164	5.701	4.448	5.386	0.739	0.471	4.313	2.919	3.06	2.388
pum2	LS	Both	gene8775	M	X	X	X	X	U	D	gene11969	M	X	X	X	X	.	D	i	1.106	1.278	i	2.364	3.025	i	4.774	5.637	-1.5	0.194	3.286	6.087	4.786	5.893	-0.775	0.855	1.755	3	0.822	1.664
wtap	LS	Both	gene5053	M	X	.	X	X	.	.	gene12563	M	.	.	X	X	U	.	i	1.597	0.616	i	0.331	0.271	i	1.383	2.248	-0.451	-0.383	2.066	2.608	2.517	2.99	-0.818	0.911	0.214	-0.243	0.018	-0.863
gna13	LS	Both	gene49788	M	X	X	X	X	.	.	gene19133	M	X	X	X	X	.	D	i	1.995	3.395	i	1.694	2.032	i	4.803	5.669	-0.416	-0.278	5.055	6.03	5.471	6.308	-0.106	-0.334	1.176	1.744	1.192	1.288
pik3r3	LS	Both	gene8776	M	.	.	X	.	.	.	gene16061	M	.	.	X	X	.	.	i	2.162	1.124	i	1.097	0	i	4.081	4.948	-0.214	0.017	1.674	2.678	1.888	2.661	-0.839	-0.454	1.169	0.989	0.964	1.279
mespb	LS	unk	gene13178	M	.	.	.	X	.	.	gene17539	.	.	.	X	X	.	.	i	0	0	e	6.433	0	e	5.246	6.114	-0.308	-1.905	5.286	3.624	5.595	5.529	1.484	0	4.931	1.742	4.117	0
mgc75753	LS	Both	gene12787	M	.	.	X	X	D	.	gene16227	M	.	X	X	X	D	.	e	0.29	0.077	i	2.73	3.687	i	5.553	6.423	1.623	1.948	6.676	6.57	5.054	4.622	1.498	1.865	1.328	3.056	0.198	0.824
mat2a	LS	Both	gene20351	M	.	X	X	X	U	D	gene14528	M	X	X	X	X	D	D	i	1.225	2.032	i	4.187	4.912	i	6.284	7.154	-0.253	0.683	6.389	7.241	6.642	6.558	0.686	1.205	3.854	3.625	2.956	3.018
plin2	LS	Both	gene12201	M	.	X	X	.	U	D	gene14482	M	.	.	X	.	.	.	i	1.602	2.171	i	2.473	2.26	i	3.963	4.835	-0.03	0.071	4.282	3.708	4.311	3.637	0.497	-0.396	2.182	1.646	1.601	1.084
foxo3	LS	Both	gene19280	M	X	X	X	.	U	D	gene40674	M	.	X	X	.	U	.	i	1.487	0.709	i	4.28	3.073	i	7.198	8.071	-1.661	-2.422	4.414	2.521	6.075	4.943	0.845	-0.191	3.182	2.286	1.394	1.34
dusp11	LS	Both	gene49693	M	.	.	X	X	U	.	gene5993	M	.	.	X	X	.	.	i	0.59	0.372	i	1.35	1.144	i	2.883	3.756	-0.83	-0.621	3.334	4.343	4.163	4.964	-0.759	-0.402	1.168	-0.42	1.46	1.091
bub3	LS	unk	gene9443	M	X	.	X	X	U	.	gene9071	M	.	.	.	X	.	.	i	1.873	1.587	i	0.431	1.08	i	2.896	3.774	-1.195	-0.763	2.637	3.388	3.832	4.151	-1.032	-1.753	0.341	0.554	0.546	1.884
arglu1	LS	Both	gene7887	M	.	X	X	X	U	.	gene13910	M	X	.	X	X	U	D	i	0.752	0	i	2.221	2.476	i	5.543	6.421	-0.069	-0.265	5.908	6.787	5.977	7.052	0.515	-0.519	1.637	2.532	1.595	2.213
otud5	LS	unk	gene46134	M	.	.	.	X	.	.	gene37638	M	.	X	X	X	U	D	i	1.549	0	i	1.791	2.19	i	3.157	4.037	-0.055	-0.243	3.072	3.78	3.127	4.023	0.017	0.92	0.688	2.579	0.451	1.235
myl6	LS	Both	gene18541	M	.	.	X	.	.	D	gene47578	M	.	X	X	X	U	D	i	1.388	1.283	i	1.537	3.712	i	2.81	3.692	0.814	-1.335	2.929	3.743	2.115	5.078	4.286	3.396	0.604	2.999	-3.062	0.639
arf4	LS	Both	gene34321	M	.	X	X	X	U	D	gene19999	M	X	X	X	X	U	D	i	2.395	3.173	i	3.397	4.974	i	6.091	6.976	-0.119	-0.978	6.98	7.373	7.099	8.351	0.642	0.463	2.832	4.664	2.529	4.089
six4	LS	Both	gene37421	M	.	X	X	X	U	.	gene47707	M	X	X	X	X	U	.	i	0	1.811	i	3.025	2.419	i	5.236	6.123	-0.61	-0.3	6.108	6.511	6.718	6.811	0.863	-0.4	1.313	0.993	0.823	1.773
ppp4c	LS	unk	gene10662	M	.	.	.	X	.	.	gene19277	M	.	.	X	.	.	.	i	0.229	0	i	1.478	1.03	i	2.854	3.743	-0.587	0.357	3.868	4.331	4.456	3.974	-0.975	-0.865	2.008	0.088	1.659	1.082
stmn1	LS	Both	gene892	M	.	X	X	X	U	.	gene48319	M	.	X	X	.	U	D	i	1.201	0.811	i	2.579	5.849	i	4.141	5.034	-1.785	-1.569	2.938	4.384	4.724	5.953	0.093	1.092	0.695	3.514	1.496	3.759
znf703	LS	unk	gene17264	M	.	.	.	X	.	.	gene9024	M	.	X	X	X	.	D	i	0.368	0.224	i	3.095	3.295	i	3.414	4.313	-0.133	0.219	2.48	3.791	2.613	3.572	1.181	1.597	1.763	2.645	0.664	1.419
tpi1	LS	Son	gene12836	M	.	.	.	.	.	.	gene8529	M	.	.	X	.	U	.	i	4.163	1.402	i	0	1.7	i	2.415	3.329	-0.588	-0.988	2.193	1.837	2.781	2.826	-0.868	2.711	1.433	-0.529	2.652	-1.502
chmp1b	LS	Both	gene16911	M	.	X	X	X	U	.	gene1178	M	.	X	X	.	U	.	i	0	2.225	i	1.797	2.922	i	4.162	5.087	-0.294	-2.027	4.861	4.296	5.154	6.322	-1.475	-0.711	1.056	2.128	1.904	2.728
fzd8	LS	Both	gene17389	.	X	X	X	X	.	D	gene1044	.	X	X	X	X	U	D	e	1.665	3.133	e	2.8	4.801	e	3.265	4.192	-0.631	-0.075	2.443	3.669	3.074	3.743	1.511	3.09	1.652	4.512	0.375	1.38
chkb	LS	unk	gene18424	M	.	.	X	.	D	.	gene3463	M	.	.	.	X	.	U	i	1.255	1.513	i	0.752	0	i	2.484	3.415	1.174	0.118	2.98	4.354	1.806	4.236	0.742	-2.443	0.196	1.023	0.713	2.848
ipmk	LS	Both	gene1714	M	.	X	X	.	U	D	gene36320	M	.	X	X	.	.	.	i	1.158	0	i	2.762	5.097	i	4.927	5.859	-0.801	-0.328	3.854	4.996	4.654	5.323	0.673	0.859	2.183	4.648	0.586	2.877
slc25a25	LS	Both	gene51032	M	.	X	X	.	U	D	gene8105	M	X	X	X	.	U	D	i	1.808	1.935	i	4.528	5.11	i	5.46	6.394	-3.582	-2.078	3.01	4.242	6.592	6.32	0.226	1.394	4.403	3.77	3.562	2.757
tbp	LS	Son	gene3192	M	.	.	.	.	.	.	gene7569	M	X	.	X	.	U	.	i	1.691	2.07	i	0.217	0	i	0.899	1.839	0.196	-1.647	1.498	1.481	1.302	3.128	-0.684	-0.584	-0.756	-0.021	0.432	0.864
ythdf2	LS	Both	gene19734	M	X	X	X	X	.	.	gene20488	M	.	.	X	X	.	.	i	1.439	1.431	i	1.743	0.598	i	3.384	4.325	0.019	0.286	4.063	4.567	4.044	4.281	0.001	0.603	1.487	1.361	1.858	0.707
rbmx	LS	Both	gene534	M	X	X	X	X	U	D	gene18450	M	.	X	X	X	.	D	i	2.033	0.811	i	2.126	2.864	i	5.772	6.714	-0.298	-0.122	6.154	6.951	6.452	7.072	-0.562	-0.198	2.057	2.507	1.813	2.003
gata6	LS	Both	gene43400	.	.	X	X	X	U	D	gene18030	.	X	X	X	X	U	D	e	0	6.422	i	9.093	9.671	i	8.165	9.11	-1.261	-2.181	6.661	7.788	7.922	9.969	3.067	-0.208	9.2	10.114	5.434	7.854
rps15	LS	Son	gene4510	M	.	.	.	X	.	.	gene7078	M	.	.	X	X	.	.	i	4.251	0.812	i	0.774	0.984	i	3.119	4.071	-1.128	-0.053	2.51	3.861	3.638	3.914	-0.612	-2.969	0.667	1.323	0.884	1.346
ube2c	LS	unk	gene18470	M	.	.	.	.	D	.	gene16814	M	.	.	X	X	.	.	i	1.642	0.935	e	0.757	0.017	i	2.06	3.014	-0.477	-0.454	2.558	2.643	3.035	3.097	0.244	0.06	0.834	0.331	1.129	0.455
pcif1	LS	unk	gene2887	M	.	.	.	.	U	.	gene6523	M	X	.	X	.	D	.	i	0.807	2.456	i	0	1.013	i	1.958	2.916	-1.635	-1.788	1.371	2.199	3.007	3.987	0.43	0.122	0.398	0.202	0.254	1.089
ppp1r37	LS	Both	gene45685	M	.	.	X	.	.	.	gene35564	M	.	.	X	X	.	.	e	0	0.048	i	0	1.379	i	3.383	4.349	-0.205	-0.02	3.93	4.765	4.135	4.785	-0.984	-0.264	0.319	0.307	-0.489	0.603
zbtb10	LS	Both	gene7316	M	X	X	X	X	.	D	gene49630	M	X	X	X	X	U	D	i	1.285	1.511	i	2.573	2.867	i	5.85	6.818	-0.154	-0.367	6.205	6.943	6.359	7.31	0.54	0.228	2.724	3.354	1.859	2.612
mapre1	LS	Both	gene6	M	.	X	X	X	.	D	gene7210	M	.	X	X	X	.	.	i	0.981	0	i	2.051	2.383	i	4.038	5.01	-0.017	0.023	4.638	5.448	4.655	5.425	-0.724	-0.546	1.864	1.306	1.677	1.385
mllt1	LS	Both	gene42220	M	.	.	X	.	.	.	gene37199	M	X	X	X	X	D	.	e	0.346	1.27	i	0.103	2.412	i	3.719	4.694	0.26	1.827	4.093	5.433	3.833	3.606	-0.155	1.298	1.309	1.833	1.076	1.29
acvr1	LS	Both	gene35625	M	X	X	X	.	U	D	gene50291	M	.	X	X	.	D	D	i	1.147	0.587	i	5.087	3.604	i	5.596	6.572	-0.105	0.786	6.464	6.852	6.568	6.066	1.356	1.416	5.119	3.658	3.348	2.058
ccno	LS	Both	gene8951	M	X	X	X	.	.	D	gene4519	M	X	X	X	X	U	D	e	0.944	1.128	i	7.281	8.307	i	9.393	10.372	-0.54	-0.328	9.555	10.358	10.096	10.687	1.524	-0.401	6.217	7.563	5.849	6.925
cdca4	LS	Both	gene15994	M	.	X	X	X	U	D	gene19555	M	X	X	X	X	U	D	i	2.133	3.132	i	2.32	4.151	i	5.708	6.701	-0.499	-0.48	6.256	6.455	6.755	6.934	-1.297	1.399	2.415	4.181	1.994	1.676
cks1b	LS	Both	gene38630	M	X	X	X	X	.	.	gene39891	M	.	.	X	X	U	.	e	1.557	0	i	4.932	3.944	i	6.483	7.478	-0.24	-1.288	6.749	6.501	6.989	7.788	-0.966	-0.394	4.331	4.134	3.107	2.676
eed	LS	Both	gene9009	M	X	.	X	.	.	.	gene43653	M	.	.	X	.	.	.	i	5.576	0.59	i	1.387	1.52	i	4.303	5.31	0.453	-0.005	4.923	5.583	4.47	5.588	-0.972	-0.496	1.328	1.769	0.35	1.984
usf2	LS	Both	gene39095	M	.	.	X	X	U	.	gene44159	M	.	.	X	X	.	.	i	0.733	0	i	1.003	3.201	i	3.838	4.847	-0.423	-0.158	4.511	6.288	4.934	6.446	-1.403	-1.2	0.599	2.319	1.282	2.899
ctnnb1	LS	Both	gene5453	M	X	X	X	X	.	D	gene17352	M	X	X	X	X	.	D	i	1.767	1.362	i	4.456	5.191	i	6.817	7.832	-0.227	0.106	6.867	8.04	7.094	7.934	0.549	0.611	4.075	4.69	2.722	3.335
tnrc6a	LS	Both	gene38312	M	X	X	X	X	U	.	gene4305	M	.	X	X	X	.	.	i	1.063	0.709	i	1.076	2.056	i	3.52	4.538	-0.035	-0.025	4.28	5.08	4.315	5.104	-0.666	-0.032	-0.185	1.628	1.274	1.645
qki	LS	Both	gene2613	M	.	X	X	X	U	D	gene12352	M	X	X	X	X	U	D	i	1.014	1.677	i	5.873	5.886	i	4.45	5.474	-0.079	-0.215	5.257	5.598	5.336	5.813	1.796	1.511	5.627	5.752	2.991	3.586
rnps1	LS	Both	gene19021	M	X	.	X	X	.	.	gene6017	M	.	.	X	X	U	.	i	1.809	0	i	0	0.661	i	3.787	4.811	-0.061	-1.665	4.154	4.085	4.215	5.75	-0.318	-1.715	-0.683	0.146	1.015	0.241
med26	LS	Both	gene1509	M	X	X	X	X	D	.	gene48205	M	.	X	X	X	U	D	i	1.529	2.547	i	1.854	3.033	i	4.285	5.322	0.694	-0.101	6.066	6.656	5.372	6.757	0.74	0.665	0.963	3.61	1.243	2.792
blzf1	LS	Both	gene11682	M	.	.	X	.	.	.	gene16651	M	.	.	X	.	.	.	i	0.809	0	i	0.579	0.651	i	2.941	3.978	-1.211	-0.856	3.285	4.737	4.496	5.593	-0.719	-0.716	0.739	0	-0.17	0.093
adarb1	LS	Both	gene18495	M	.	X	X	.	U	D	gene20069	M	X	X	X	.	.	D	i	0.632	1.639	i	4.066	2.672	i	3.319	4.359	-0.937	0.274	3.428	4.833	4.365	4.559	0.544	-0.004	3.741	2.423	2.418	1.761
clk2	LS	Both	gene3614	M	.	.	X	X	.	.	gene14923	M	.	.	X	X	.	.	i	0.71	0.694	i	0.882	0.785	i	1.926	2.966	-0.693	-0.313	1.484	3.067	2.176	3.38	0.238	0.068	0.865	-0.079	1.085	0.31
lsm14a	LS	Both	gene18213	M	.	.	X	X	U	.	gene6880	M	X	.	X	X	.	.	i	1.81	1.678	i	0.881	0.95	i	3.558	4.611	0.003	-0.186	4.461	5.269	4.458	5.455	-0.77	-0.393	0.66	0.721	0.879	1.827
ogdh	LS	Both	gene12448	M	X	X	X	X	D	D	gene13766	M	X	X	X	.	U	.	i	0.982	1.292	i	2.084	2.897	i	3.838	4.894	0.871	-0.625	4.505	4.325	3.634	4.95	1.019	-0.214	2.059	1.414	1.124	1.746
chst7	LS	Son	gene9113	M	.	.	.	X	.	.	gene18605	M	.	.	X	X	.	.	e	0.096	0.306	e	0	0.052	e	0.085	1.145	-0.235	-0.263	-0.005	1.23	0.23	1.493	1.288	1.448	-0.213	0.192	-0.718	0.006
epc2	LS	Both	gene36567	M	X	X	X	X	.	.	gene10776	M	.	X	X	X	.	.	i	1.256	0.073	i	2.341	2.434	i	4.113	5.175	0.479	-0.163	4.998	5.618	4.519	5.781	0.459	-0.353	1.383	2.225	1.191	2.045
lman2l	LS	Both	gene1281	M	.	.	X	X	.	.	gene7979	M	.	X	X	.	U	D	i	0.224	0.934	i	1.912	2.772	i	5.121	6.184	-0.55	0.067	3.898	5.971	4.448	5.904	0.617	-0.143	0.324	2.438	2.541	1.739
kmt5a	LS	Both	gene5741	M	.	X	X	.	D	D	gene16780	M	X	X	X	.	.	D	i	0.225	1.35	i	2.402	2.439	i	5.417	6.48	3.686	0.511	5.734	6.572	2.048	6.061	2.696	1.082	1.627	2.082	0.22	1.382
spry2	LS	Both	gene13048	M	.	X	X	X	D	D	gene8750	M	X	X	X	X	D	D	i	3.253	5.574	i	3.338	4.547	i	7.082	8.146	2.115	2.405	7.425	8.662	5.31	6.257	0.866	3.504	3.136	3.023	0.824	0.09
gmnn	LS	Both	gene19653	M	X	X	X	X	.	D	gene7291	M	.	X	X	.	D	D	i	2.326	0.35	i	2.192	2.027	i	3.463	4.532	-0.635	1.773	2.603	4.884	3.237	3.111	0.951	1.037	1.504	0.551	0.433	-0.012
chd1	LS	Both	gene13168	M	X	.	X	X	U	U	gene46071	M	X	X	X	.	U	.	i	1.342	1.171	i	0.843	1.329	i	2.659	3.728	-0.636	-0.372	3.757	4.368	4.393	4.739	-0.869	-0.324	0.462	1.004	1.981	1.56
pnrc2	LS	Both	gene18003	M	.	X	X	X	.	D	gene3867	M	.	X	X	X	.	D	i	0	1.81	i	4.971	5.086	i	6.882	7.957	0.219	0.559	6.366	8.34	6.148	7.781	1.83	1.54	4.842	5.27	2.632	3.497
ugcg	LS	Both	gene8521	M	.	X	X	X	.	D	gene16422	M	X	X	X	X	U	D	i	0.225	3.395	i	6.325	8.315	i	6.169	7.246	-0.039	-0.425	7.343	7.323	7.382	7.748	2.892	2.514	5.789	7.457	3.093	4.95
farp2	LS	Both	gene36992	M	.	X	X	.	U	D	gene17185	M	.	X	X	X	U	D	i	0.164	1.118	i	4.082	4.168	i	5.094	6.186	-1.061	-0.853	3.971	6.799	5.032	7.652	0.995	0.347	3.368	3.73	1.621	3.282
ackr3	LS	Both	gene12973	.	.	X	X	X	U	D	gene13736	.	.	X	X	X	U	D	i	0	0	i	5.311	6.976	i	7.216	8.315	-0.588	-0.544	7.499	8.902	8.087	9.446	1.256	2.141	5.241	5.603	3.795	3.677
ranbp3	LS	Both	gene8212	M	.	X	X	X	.	D	gene12446	M	.	X	X	X	.	.	i	0.293	0.786	i	3.257	3.854	i	3.121	4.224	0.372	0.032	4.047	5.085	3.675	5.053	1.056	-0.024	2.754	2.618	1.491	2.759
lmnb1	LS	Both	gene18772	M	X	X	X	.	U	D	gene9125	M	.	X	X	X	U	D	i	1.612	1.072	i	1.575	3.319	i	4.804	5.929	-0.622	-0.726	4.977	6.112	5.599	6.838	-0.9	-0.259	1.616	3.128	1.641	3.091
prpf40a	LS	Both	gene12425	M	.	.	X	X	U	.	gene1879	M	.	.	X	X	U	.	i	1.017	0.641	i	0.154	0.555	i	3.136	4.264	-1.4	-0.963	2.983	3.586	4.383	4.549	-0.441	-0.305	0.164	0.761	0.155	1.284
rnf121	LS	Both	gene8602	M	.	.	X	X	U	.	gene7963	M	.	.	X	.	U	.	i	0.344	0	i	0.733	0.489	i	2.778	3.912	-1.026	-1.731	2.902	3.295	3.928	5.026	-1.855	-2.277	0.531	0.666	1.374	1.83
dkk1	LS	Both	gene8044	.	.	X	X	X	D	D	gene927	.	X	X	X	X	D	D	e	0	7.159	e	7.149	7.09	i	7.412	8.557	1.769	1.876	8.458	8.905	6.689	7.029	6.31	2.537	5.073	6.396	0	4.116
stk40	LS	Both	gene20392	M	.	X	X	X	D	U	gene39851	M	X	X	X	X	D	.	i	0	1.505	i	2.911	2.394	i	4.616	5.764	1.943	2.281	5.963	5.911	4.02	3.629	-1.579	0.657	0.723	1.703	1.69	1.547
ubtf	LS	Both	gene3658	M	.	X	X	X	U	D	gene13870	M	.	X	X	X	U	D	i	1.431	1.547	i	2.48	3.509	i	4.818	5.968	-1.071	-2.019	4.161	4.796	5.231	6.815	0.58	0.092	2.507	3.178	2.286	1.81
ddit4	LS	Both	gene14940	M	.	X	X	.	.	D	gene9060	M	.	X	X	X	U	.	i	1.811	0	i	4.791	4.507	i	6.385	7.538	-0.56	-0.638	5.14	7.165	5.7	7.804	2.589	-0.284	3.575	4.012	0.829	3.789
ppat	LS	Both	gene3252	M	X	X	X	X	.	D	gene11392	M	.	X	X	.	U	.	i	1.926	0	i	3.224	3.115	i	3.625	4.78	0.456	-1.207	4.087	4.663	3.63	5.87	1.746	1.682	2.088	2.414	0.933	2.001
sri	LS	Both	gene5315	M	.	.	X	X	U	.	gene46247	M	X	X	X	X	U	.	i	1.807	2.295	i	1.629	2.842	i	3.738	4.895	-1.711	-1.812	3.88	4.693	5.592	6.505	2.769	0.262	1.054	1	-0.49	1.63
ubtd1	LS	Both	gene12739	M	X	X	X	X	U	D	gene46866	M	.	X	X	X	D	D	i	2.448	0.722	i	2.233	3.507	i	5.324	6.482	-1.087	0.798	5.254	6.473	6.341	5.676	-0.105	1.207	3.128	3.404	1.799	2.087
gnb1	LS	Both	gene15521	M	X	X	X	X	U	.	gene6355	M	.	X	X	X	U	D	i	0.886	0.898	i	1.608	3.008	i	4.667	5.825	-1.309	-2.083	4.239	4.381	5.548	6.463	-0.55	-1.09	0.934	2.818	1.73	2.505
ptmap12	LS	Both	gene2563	M	X	X	X	X	.	D	gene11772	M	X	X	X	X	.	D	i	1.395	1.489	i	3.8	5.171	i	5.949	7.11	0.003	-0.183	6.276	7.186	6.272	7.369	2.21	2.3	3.527	4.515	1.25	2.313
f2rl1	LS	Both	gene34767	M	.	X	X	.	D	.	gene13597	M	.	X	X	.	U	D	i	0.811	0.368	i	4.943	5.534	i	7.45	8.616	0.001	-1.969	8.053	8.032	8.052	10.001	0.179	-1.988	4.409	5.836	3.678	5.119
lrp10	LS	Son	gene37893	M	.	.	.	X	.	D	gene43486	M	X	.	X	X	.	D	e	0	1.256	e	0.52	0.164	i	3.024	4.201	0.022	-0.089	4.206	4.894	4.184	4.982	0.674	1.493	0.467	-0.195	-0.121	-1.017
fxr1	LS	Both	gene17701	M	.	.	X	X	U	.	gene11006	M	.	.	X	X	U	.	i	0.757	0.223	i	0.371	1.38	i	2.979	4.159	0.166	-0.44	3.984	4.056	3.818	4.495	-0.751	-1.201	0.733	1.202	1.058	1.316
snu13	LS	Both	gene1654	M	.	.	X	X	.	.	gene14148	M	.	.	X	X	.	.	i	0.808	0	i	2.262	0	i	4.697	5.882	-0.112	-0.554	6.128	6.538	6.241	7.092	1.613	-1.13	1.312	0.9	1.083	2.41
scamp2	LS	Both	gene12089	M	.	X	X	.	.	D	gene35566	M	X	X	X	X	.	D	i	1.002	2.132	i	4.909	3.963	i	4.717	5.903	-0.443	0.226	4.375	6.685	4.818	6.458	0.4	1.688	4.864	3.935	3.574	1.967
esyt2	LS	Both	gene45863	M	X	X	X	X	U	D	gene39715	M	X	X	X	X	U	D	i	1.81	1.81	i	5.501	6.685	i	5.885	7.072	-0.33	-0.685	5.671	6.171	6.001	6.856	2.768	2.877	5.261	6.697	2.508	3.422
rps10	LS	Both	gene17503	M	.	.	X	X	U	.	gene42202	M	X	.	X	X	.	.	i	0.762	2.271	i	0.3	0.616	i	2.826	4.019	-0.927	-0.225	2.388	2.751	3.315	2.976	0.041	-0.214	0.16	0.705	0.589	0.754
neurog3	LS	Both	gene4593	.	.	X	X	.	D	D	gene47194	.	X	X	X	X	D	D	e	4.251	4.838	e	8.207	9.453	e	5.201	6.394	3.724	2.32	7.338	6.276	3.614	3.956	4.341	2.827	6.942	8.998	4.517	5.87
pdk4	LS	Both	gene18914	.	.	X	X	X	.	D	gene12858	.	.	X	X	X	D	D	e	1.265	0.64	i	6.369	4.145	i	6.777	7.981	0.236	2.818	7.652	7.107	7.416	4.289	2.837	1.042	6.303	4.194	3.559	2.083
marcksl1	LS	unk	gene4017	M	.	.	.	X	.	.	gene8954	M	.	.	X	X	.	.	i	0	0.366	i	3.487	2.835	i	6.277	7.483	0.226	1.235	5.971	7.533	5.744	6.299	1.468	3.041	1.75	4.762	0	0
znf326	LS	Both	gene4599	M	.	X	X	X	U	.	gene10620	M	.	X	X	X	U	D	i	0.653	1.055	i	1.585	3	i	5.09	6.297	-0.448	-0.013	5.566	6.799	6.014	6.812	-0.91	-0.342	1.42	2.57	1.61	2.766
ulk1	LS	Both	gene46990	M	.	.	X	.	U	.	gene13964	M	.	X	X	X	.	D	e	0.191	0	i	0.819	2.175	i	6.816	8.028	-0.943	-0.25	3.151	4.044	4.093	4.295	0.352	2.129	-0.108	2.787	0.791	0.257
emg1	LS	Son	gene13024	M	.	.	.	.	.	.	gene18482	M	.	.	X	.	.	.	i	1.397	0	i	0.487	0	i	2.591	3.803	-1.305	-0.793	2.181	3.899	3.487	4.691	-4.448	1.836	-0.163	0.569	0.896	-0.651
ndrg2	LS	Both	gene40032	M	.	X	X	X	U	D	gene280	M	.	X	X	.	.	D	i	1.025	1.394	i	3.535	2.346	i	4.98	6.193	0.028	-0.501	5.252	4.523	5.223	5.023	1.284	0.65	3.084	2.158	1.874	1.696
hes5.7	LS	Both	gene45923	.	.	X	X	X	U	D	gene38808	.	.	X	X	.	U	D	e	0	1.81	e	5.82	5.688	e	3.477	4.691	-1.478	-0.8	4.315	5.356	5.793	6.155	2.678	0.8	5.409	5.36	2.684	3.797
ddx5	LS	Both	gene5879	M	.	X	X	X	.	D	gene41485	M	X	X	X	X	.	D	i	0.903	1.71	i	4.985	6.112	i	7.411	8.628	0.555	0.531	7.675	9.035	7.12	8.504	1.262	1.292	4.66	5.732	2.743	3.902
tram2	LS	Both	gene12708	M	.	X	X	.	.	D	gene11002	M	.	X	X	X	U	.	i	0.964	0	i	2.719	3.127	i	3.413	4.633	0.305	-0.534	4.46	5.514	4.156	6.048	2.214	0.02	2.162	1.769	0.667	2.002
hes5.10	LS	Both	gene7690	.	.	.	X	X	.	.	gene1474	.	.	X	X	X	.	D	i	0	0	e	2.76	5.476	e	5.333	6.554	-0.382	0.068	6.895	7.845	7.277	7.777	0.496	3.952	4.93	5.462	1.637	1.637
prpf39.1	LS	Both	gene40509	M	.	.	X	X	.	.	gene5820	M	.	.	X	X	U	.	i	0.093	1.094	i	0.414	1.444	i	3.442	4.669	-0.085	-1.194	4.44	4.785	4.525	5.979	-0.718	-1.464	0.16	1.437	1.09	2.151
yy1	LS	Both	gene6257	M	.	X	X	.	U	D	gene1323	M	.	X	X	.	U	.	i	1.811	0	i	3.605	3.235	i	6.557	7.792	-1.157	-0.864	6.384	6.31	7.54	7.174	-0.151	0.348	2.955	2.225	3.088	2.609
tmem39b	LS	Son	gene15733	M	.	.	.	.	.	.	gene8897	M	.	X	X	.	D	D	e	0.092	0	i	0	2.801	i	0.981	2.251	-0.328	1.307	2.568	4.577	2.897	3.27	-1.204	0.549	-0.561	1.951	0.428	2.029
larp1	LS	Both	gene15496	M	X	X	X	X	U	D	gene15768	M	.	X	X	X	U	D	i	1.225	0	i	3.892	3.912	i	5.9	7.173	-0.442	-2.06	6.099	5.735	6.54	7.795	1.197	-0.788	3.397	3.485	2.468	3.308
slc17a9	LS	Both	gene13659	M	.	.	X	X	.	.	gene1686	.	.	.	X	X	D	.	i	1.811	0.366	i	1.95	0	i	3.624	4.899	-0.234	0.994	4.418	7.548	4.652	6.554	1.608	3.817	0.731	0.316	0.504	0.196
ccnb2	LS	Both	gene19329	M	X	.	X	X	U	.	gene12948	M	X	.	X	X	.	.	i	2.926	2.49	i	1.417	0	i	3.263	4.554	-0.486	-0.273	4.261	4.095	4.747	4.369	1.726	-0.075	0.589	-0.392	0.363	0.078
ccnl1	LS	Both	gene858	M	X	.	X	X	.	.	gene35627	M	X	.	X	X	.	.	i	1.083	1.955	i	0	0	i	2.486	3.79	-0.046	-0.264	3.119	4.416	3.165	4.68	-0.471	-0.596	0.059	0.093	0.974	1.286
cox17	LS	Both	gene390	M	.	.	X	X	.	.	gene9823	M	.	.	X	.	.	.	i	0.814	0	i	1.703	0	i	3.07	4.395	-0.394	-0.078	4.076	3.681	4.47	3.759	-0.32	-0.658	1.172	1.302	1.582	1.671
elavl1	LS	Both	gene10263	M	X	.	X	X	.	.	gene17598	M	.	.	X	X	D	.	i	2.311	0.397	i	0.604	2.36	i	4.663	5.996	-0.136	0.602	5.989	7.512	6.125	6.91	-0.915	-0.033	-0.146	1.309	1.154	2.307
gpsm2	LS	Both	gene18878	M	.	X	X	X	.	D	gene12764	M	X	.	X	X	D	.	i	0	2.395	i	3.645	0.311	i	4.29	5.624	0.294	2.575	5.314	6.238	5.02	3.664	1.327	-0.744	3.038	-0.732	1.872	-0.058
msx1	LS	Son	gene10987	.	.	.	.	X	U	D	gene3256	.	.	X	X	X	U	D	i	0	3.253	i	8.301	6.428	i	4.204	5.547	-2.305	-1.156	4.505	4.406	6.81	5.561	0.594	0.707	8.403	6.69	6.579	5.025
thumpd1	LS	Son	gene10377	M	.	.	.	X	.	.	gene12183	M	.	.	X	.	.	.	i	1.215	0	i	0.22	0	i	2.112	3.466	0.235	-0.376	3.218	4.22	2.983	4.596	-1.821	-2.296	1.324	-1.688	2.329	1.982
safb	LS	Both	gene1851	M	.	.	X	X	U	.	gene10692	M	.	.	X	X	U	D	i	0.746	0.654	i	0	1.1	i	3.231	4.59	-0.099	-0.21	3.847	5.116	3.947	5.326	-0.58	-1.126	-0.347	1.509	0.046	1.756
tmbim6	LS	unk	gene7044	M	.	.	X	.	U	.	gene894	M	.	.	.	.	D	.	i	0.749	0	i	0.845	1.961	i	1.929	3.293	-0.342	1.301	2.314	5.631	2.656	4.33	-0.779	0.898	0.465	1.758	0.769	0.988
pbx2	LS	Both	gene40045	M	.	X	X	X	.	D	gene13904	M	.	X	X	X	U	D	i	2.131	0.431	i	3.469	2.891	i	3.488	4.863	0.3	-0.774	4.079	4.411	3.779	5.185	3.109	2.141	3.178	2.287	0.672	0.544
zfx	LS	Both	gene18647	M	.	.	X	X	U	.	gene12605	M	.	.	X	X	U	.	i	0.974	1.017	i	0	0.271	i	2.363	3.738	-1.714	-1.478	1.95	3.16	3.663	4.638	-0.778	-0.174	-0.397	0.435	0.882	0.385
lcor	LS	Both	gene48656	M	X	X	X	X	U	D	gene50149	M	.	X	X	X	.	D	i	2.19	0.66	i	1.756	1.736	i	2.23	3.61	-0.353	0.278	2.487	4.036	2.84	3.758	0.421	0.25	1.395	1.901	0.623	0.964
adgrl2	LS	Both	gene10944	M	X	X	X	X	.	D	gene4473	M	X	X	X	X	U	D	i	0.987	1.833	i	4.363	4.391	i	2.828	4.211	-0.538	0.048	3.319	4.986	3.857	4.939	1.086	0.749	3.929	4.227	2.201	2.486
csnk2a1	LS	Both	gene4060	M	X	.	X	X	U	.	gene49548	M	.	.	X	X	U	.	i	1.744	0.981	i	0	0.634	i	3.385	4.769	-1.584	-1.331	2.476	4.254	4.06	5.585	0.539	-1.135	0.319	0.993	0.589	0.504
ppp1r26	LS	unk	gene6706	M	.	.	X	X	.	.	gene11325	M	.	.	.	.	.	.	i	0.81	0.363	i	0.794	1.841	i	4.452	5.838	-0.419	-0.333	3.721	5.836	4.14	6.169	0.482	-0.415	1.31	1.749	0.972	2.545
marcks	LS	Both	gene18158	M	X	X	X	X	U	.	gene4201	M	.	X	X	X	.	D	i	1.925	0	i	1.66	4.467	i	4.824	6.213	-0.641	-0.027	5.072	6.765	5.713	6.791	-0.043	0.807	-0.006	4.275	0.99	3.09
ptp4a1	LS	Both	gene19882	M	.	.	X	.	.	.	gene41812	M	.	X	X	X	U	.	i	1.17	0.367	i	0.018	3.059	i	5.516	6.906	-0.113	0.038	5.566	7.351	5.679	7.314	-0.489	-1.918	-0.427	3.268	1.661	2.607
dsg2	LS	Both	gene9040	M	.	.	X	X	U	D	gene17432	M	X	X	X	X	U	D	e	0.273	2.345	i	1.596	4.629	i	3.344	4.739	-1.092	-1.081	3.544	5.8	4.636	6.88	0.944	-0.289	1.909	5.222	0.681	3.889
klf5	LS	Both	gene35533	M	.	X	X	X	U	D	gene47302	M	.	X	X	.	.	D	i	0.732	1.807	i	4.747	6.276	i	5.677	7.075	-1.105	-0.841	5.256	6.738	6.361	7.579	0.993	2.562	3.387	5.07	2.475	3.277
fgf20	LS	Both	gene12677	.	.	X	X	X	.	D	gene12904	.	.	X	X	X	.	D	i	3.253	0	e	7.085	5.422	i	6.828	8.23	-0.026	0.652	7.505	7.991	7.531	7.338	2.513	2.416	5.933	4.568	4.361	2.523
nufip2	LS	Both	gene863	M	.	X	X	X	D	D	gene36911	M	X	X	X	X	U	D	i	0.678	1.694	i	2.209	3.804	i	3.327	4.734	1.012	0.032	3.147	5.041	2.135	5.009	1.026	0.83	1.731	3.734	0.595	2.555
ralgds	LS	Both	gene44199	M	X	X	X	X	U	D	gene45390	M	.	X	X	X	U	D	i	1.571	0.81	i	4.588	3.069	i	2.934	4.342	-1.357	-2.113	3.03	4.65	4.387	6.762	1.311	2.109	3.773	3.176	2.375	1.344
lamc1	LS	Both	gene12929	M	X	X	X	X	U	D	gene5753	M	.	X	X	X	D	D	i	1	0.225	i	2.323	3.373	i	4.822	6.232	-0.072	1.069	4.567	5.611	4.639	4.541	1.254	1.618	2.231	2.758	0.648	1.047
rhpn2	LS	Both	gene9654	M	.	X	X	X	U	D	gene18546	M	.	X	X	X	.	D	i	0.35	0	i	5.886	4.936	i	6.93	8.34	-0.99	0.479	7.041	9.62	8.032	9.14	1.206	1.761	6.339	6.187	4.353	4.419
phf5a	LS	Both	gene1931	M	.	.	X	X	U	.	gene16676	M	.	.	X	.	.	.	i	1.293	0	i	0	2.225	i	3.929	5.345	-0.124	-0.297	4.937	5.09	5.061	5.387	-2.057	1.192	-0.896	0.73	1.535	-0.489
rbm12b.3	LS	Both	gene10040	M	X	.	X	X	U	.	gene35866	M	.	.	X	X	.	.	i	1.491	0	i	0.501	2.41	i	3.454	4.871	-0.758	-0.594	3.866	3.829	4.624	4.423	1.511	-0.943	-0.095	-1.122	-0.494	0.202
ywhaz	LS	Both	gene15998	M	X	X	X	X	.	.	gene11445	M	.	X	X	X	U	D	i	1.492	1.462	i	2.255	2.938	i	3.197	4.615	-0.354	-0.286	3.783	4.88	4.138	5.166	0.159	0.693	2.18	2.719	2.158	2.326
usp1	LS	Both	gene4404	M	X	.	X	.	.	.	gene13677	M	X	.	X	X	.	.	i	1.87	1.719	i	0.615	1.168	i	1.433	2.855	0.557	-0.169	2.649	3.443	2.092	3.612	1.067	-0.097	-0.186	0.531	-0.008	0.793
cnot4	LS	Both	gene15372	M	.	.	X	X	.	D	gene40689	M	.	X	X	X	.	D	i	0.662	0.645	i	1.004	1.762	i	2.199	3.627	0.234	-0.349	2.375	3.123	2.141	3.472	0.355	0.669	1.328	1.898	0.297	1.423
rps13	LS	Both	gene12432	M	.	.	X	X	.	.	gene1417	M	.	.	X	X	U	.	i	0	0.936	i	1.443	1.225	i	3.171	4.628	-0.505	-0.244	2.582	4.874	3.086	5.118	0.022	0.083	0.648	1.653	1.113	1.553
baz1b	LS	Both	gene8976	M	X	.	X	X	.	.	gene40207	M	.	.	X	X	.	.	i	0.932	0.576	i	0.618	1.005	i	1.608	3.066	-0.325	-0.148	2.169	3.093	2.495	3.24	-0.361	-0.974	0.75	0.497	0.5	1.284
mta2	LS	Both	gene19644	M	.	.	X	X	U	.	gene48230	M	.	.	X	X	U	.	i	0.434	0	i	0	0	i	3.753	5.212	-1.925	-2.439	2.578	3.341	4.503	5.78	-0.972	-0.87	-0.613	-0.091	-0.109	1.898
tpr	LS	Son	gene43582	.	.	.	.	.	.	.	gene1645	M	.	.	X	X	.	U	i	0	0.58	e	0.931	0	i	0	1.461	0	-0.016	0	2.811	0	2.827	3.461	-0.156	0.338	-0.345	-2.795	-0.044
brd4	LS	Both	gene12898	M	X	X	X	X	U	D	gene11939	M	.	X	X	X	U	D	i	1.536	0.809	i	1.774	3.383	i	3.825	5.29	-1.925	-1.209	2.661	5.152	4.586	6.361	-0.995	-1.115	2.068	2.974	1.684	2.804
pklr	LS	Son	gene43658	M	.	.	.	.	.	.	gene4759	M	.	X	X	.	.	.	i	0	0.4	i	0	1.319	i	0	1.465	0	-0.138	0	0.151	0	0.289	0	0.347	0	0.186	0	-0.22
zic3	LS	Both	gene3249	.	.	.	X	X	D	.	gene39558	.	.	.	X	X	D	.	i	0	0	e	0	4.117	e	8.264	9.732	8.04	6.617	9.765	10.826	1.725	4.21	1.464	3.043	0	2.759	0	0
selenot	LS	Both	gene41437	M	.	.	X	X	U	.	gene49698	M	.	.	X	X	.	D	i	0	0	i	0	2.49	i	3.656	5.124	-0.36	-0.28	4.297	6.03	4.657	6.311	2.339	0.482	0.737	3.202	-1.496	2.204
pdia3	LS	Both	gene45816	M	.	X	X	X	U	.	gene12353	M	X	X	X	X	.	D	i	0.809	1.547	i	2.729	3.129	i	2.93	4.402	-0.756	0.159	3.096	5.383	3.852	5.224	0.894	1.327	2.473	2.312	1.885	1.64
kiaa0232	LS	Both	gene5353	M	X	X	X	.	U	D	gene45575	M	.	X	X	X	U	D	i	1.942	1.225	i	2.817	4.055	i	3.832	5.304	0.067	-0.028	5.051	6.046	4.985	6.074	1.278	1.123	1.83	3.67	0.963	2.522
enc1	LS	Both	gene16747	M	.	X	X	X	U	D	gene18476	M	X	X	X	.	U	D	i	1.074	3.487	i	3.948	3.796	i	7.067	8.54	-0.696	-1.101	5.357	5.732	6.053	6.834	1.375	2.356	3.729	4.77	2.567	0.67
sf3a2	LS	Both	gene36439	M	X	.	X	X	U	.	gene47999	M	.	.	X	X	U	.	i	1.81	0	i	0	1.362	i	3.273	4.747	-1.354	-0.941	3.133	4.869	4.488	5.811	0.255	-0.381	-0.459	1.308	-0.337	1.493
lbr	LS	Both	gene8631	M	.	X	X	.	.	.	gene7184	M	.	X	X	X	U	D	i	1.07	0.587	i	3.273	3.896	i	3.747	5.222	-0.153	-1.66	4.064	4.634	4.217	6.295	0.686	-0.874	2.461	3.827	1.171	3.033
tent5a	LS	Both	gene9538	.	X	X	X	.	U	D	gene2479	.	.	X	X	.	U	D	i	3.252	3.253	i	3.601	6.938	i	6.799	8.282	-1.795	-1.455	3.187	6.859	4.981	8.314	1.588	2.618	2.446	5.998	-0.485	2.531
ssb	LS	unk	gene3310	M	X	X	X	.	U	.	gene16768	M	.	.	.	X	U	.	i	1.732	0.735	i	1.883	0.132	i	1.968	3.458	-0.936	0.1	2.233	3.49	3.169	3.389	0.208	0.706	0.533	-0.219	1.333	-0.152
[truncated: 628 more rows]

## Sheet: C. LS pairs v10.1 chromatin
Gene	Geneid.L	Geneid.S	Homeo_activation	s9_rna_L_vs_S_lfc	K4_s8_rpkm.L	K4_s8_rpkm.S	K4_s9_rpkm.L	K4_s9_rpkm.S	K27_s8_rpkm.L	K27_s8_rpkm.S	K27_s8_Upstream_rpkm.L	K27_s8_Upstream_rpkm.S
[truncated: 2,041 more rows]

[truncated: 2 more sheets: D. Lineage LS activation, Legend]
