# Supplementary material for: Hybridization led to a rewired pluripotency network in the allotetraploid Xenopus laevis
Source: eLife. 2023 Oct 3;12:e83952. doi: 10.7554/eLife.83952 (PMC10569791; doi:10.7554/eLife.83952)
Supplement: Supplementary file 3. [file elife-83952-supp3.xlsx]

## Sheet: A. All TSSs v9.2
Chr	Start	End	Geneid	RNA-seq_support	Strand
chr3L	67256401	67256402	gene1	.	-
chr3L	4359799	4359800	gene10	.	+
chr8S	79983349	79983350	gene100	X	-
chr2L	154042388	154042389	gene1000	X	-
chr8L	97024364	97024365	gene10000	X	+
chrUn_NW_016694837v1	929192	929193	gene10001	X	+
chr7L	97102804	97102805	gene10002	.	+
chr6S	50607907	50607908	gene10003	.	+
chr6L	41925311	41925312	gene10004	X	-
chr4S	112272744	112272745	gene10005	X	-
chr1L	141080956	141080957	gene10006	X	+
chr2S	48972551	48972552	gene10007	.	+
chr9_10L	106521968	106521969	gene10008	X	-
chr7S	16092147	16092148	gene10009	X	+
chr2L	158344310	158344311	gene1001	X	+
chr2S	154269044	154269045	gene10010	X	-
chr9_10L	52338980	52338981	gene10011	X	+
chr3L	144153449	144153450	gene10012	X	-
chr9_10L	15899103	15899104	gene10013	.	-
chr5S	103183379	103183380	gene10014	.	+
chr2S	67095365	67095366	gene10015	X	-
chr4L	64109062	64109063	gene10016	X	+
chr9_10S	9694017	9694018	gene10017	X	+
chr3L	80954753	80954754	gene10018	X	-
chr2L	110345463	110345464	gene10019	X	-
chr7L	102421514	102421515	gene1002	X	+
chr1L	169554245	169554246	gene10020	X	-
chr4S	71504590	71504591	gene10021	X	-
chr9_10S	6834254	6834255	gene10022	X	-
chr8L	112971186	112971187	gene10023	X	+
chr2S	58939064	58939065	gene10024	X	-
chr1L	101479485	101479486	gene10025	X	-
chr2L	171297978	171297979	gene10026	X	-
chr9_10L	70658207	70658208	gene10027	X	+
chr5L	158780664	158780665	gene10028	X	-
chr2S	84270836	84270837	gene10029	X	+
chr1S	68572584	68572585	gene1003	.	-
chr3L	46448900	46448901	gene10030	.	+
chr1S	59840668	59840669	gene10031	X	+
chr7L	6320534	6320535	gene10032	.	-
chr3L	48644711	48644712	gene10033	X	+
chr1L	109119026	109119027	gene10034	.	+
chr2L	174580318	174580319	gene10035	.	+
chr6S	105286805	105286806	gene10036	X	-
chr7L	16970428	16970429	gene10037	X	-
chr2S	95022622	95022623	gene10038	X	-
chr8L	99290411	99290412	gene10039	.	-
chr8S	82520418	82520419	gene1004	.	-
chr6L	128415938	128415939	gene10040	X	-
chr1L	131047987	131047988	gene10041	X	+
chr5L	19443279	19443280	gene10042	X	+
chr8S	15758979	15758980	gene10043	X	-
chr3L	54218836	54218837	gene10044	X	-
chr8S	98055	98056	gene10045	X	+
chr9_10S	62873130	62873131	gene10046	X	+
chr6S	32383646	32383647	gene10047	.	+
chr9_10L	113693407	113693408	gene10048	X	+
chr4L	27312119	27312120	gene10049	.	+
chr7L	1933024	1933025	gene1005	.	-
chr2S	137995752	137995753	gene10050	.	+
chr3L	49142342	49142343	gene10051	X	+
chr9_10S	63549425	63549426	gene10052	X	-
chr8L	33664420	33664421	gene10053	X	-
chr1L	141785332	141785333	gene10054	X	+
chr7S	83995379	83995380	gene10055	X	-
chr9_10L	89418254	89418255	gene10056	X	+
chr2L	60452444	60452445	gene10057	X	-
chr4L	83636938	83636939	gene10058	.	+
chr1L	148019251	148019252	gene10059	.	+
chr3L	12889594	12889595	gene1006	.	+
chr7L	118960713	118960714	gene10060	.	+
chr7S	30167184	30167185	gene10061	X	+
chr7S	41119270	41119271	gene10062	.	+
chr9_10S	35396601	35396602	gene10063	.	-
chrUn_NW_016694862v1	555746	555747	gene10064	X	-
chr4L	29515115	29515116	gene10065	X	-
chr6S	25356377	25356378	gene10066	.	+
chr2L	152045052	152045053	gene10067	X	-
chr1S	118768774	118768775	gene10068	X	+
chr2S	73793766	73793767	gene10069	X	-
chr3S	71342138	71342139	gene1007	X	+
chr2L	148376178	148376179	gene10070	X	-
chr9_10L	4759839	4759840	gene10071	.	+
chr4L	64567514	64567515	gene10072	X	-
chr8L	21688900	21688901	gene10073	X	-
chr5S	11837289	11837290	gene10074	X	-
chr1L	161626704	161626705	gene10075	X	+
chrUn_NW_016694822v1	524415	524416	gene10076	.	+
chr9_10S	13490854	13490855	gene10077	X	-
chr4L	130295980	130295981	gene10078	X	+
chr8L	55396160	55396161	gene10079	X	-
chr8L	93728486	93728487	gene1008	X	+
chr1L	15046395	15046396	gene10080	X	+
chr2L	113773130	113773131	gene10081	X	+
chr9_10L	97697663	97697664	gene10082	X	-
chr4L	87781619	87781620	gene10083	X	-
chr3L	129789928	129789929	gene10084	.	-
chr4L	135718225	135718226	gene10085	X	+
chr4S	711122	711123	gene10086	X	-
chr7L	123835545	123835546	gene10087	X	+
chr4L	23517953	23517954	gene10088	X	-
chr1S	78866768	78866769	gene10089	X	-
chr9_10S	89610783	89610784	gene1009	X	-
chr5S	44183056	44183057	gene10090	X	+
chrUn_NW_016694876v1	207950	207951	gene10091	.	-
chr9_10L	30350039	30350040	gene10092	X	+
chr8L	53495984	53495985	gene10093	X	+
chrUn_NW_016694832v1	1150163	1150164	gene10094	X	+
chr2L	14578108	14578109	gene10095	X	-
chr9_10L	1052066	1052067	gene10096	.	+
chr9_10L	22904697	22904698	gene10097	.	+
chr5L	75908722	75908723	gene10098	.	+
chr6L	46443905	46443906	gene10099	.	-
chr5S	131841841	131841842	gene101	.	-
chr7L	5832810	5832811	gene1010	.	+
chr9_10L	6218171	6218172	gene10100	X	+
chrUn_NW_016694830v1	1142222	1142223	gene10101	X	+
chr1S	125103788	125103789	gene10102	X	+
chr8L	36726952	36726953	gene10103	X	+
chr1L	32511256	32511257	gene10104	X	+
chr2S	28971432	28971433	gene10105	.	+
chr2S	129796408	129796409	gene10106	X	-
chr3S	66082937	66082938	gene10107	X	+
chr7L	19759661	19759662	gene10108	X	-
chr4S	62731267	62731268	gene10109	X	-
chr9_10L	83859451	83859452	gene1011	.	+
chr8S	42710902	42710903	gene10110	X	-
chr3L	107923804	107923805	gene10111	X	+
chr1L	10184436	10184437	gene10112	X	+
chr2L	59203831	59203832	gene10113	.	-
chr1L	136054242	136054243	gene10114	X	+
chr3L	18289700	18289701	gene10115	X	+
chr4S	21480262	21480263	gene10116	X	-
chrUn_NW_016694824v1	1185937	1185938	gene10117	X	-
chr3L	77988616	77988617	gene10118	X	-
chr8L	113623443	113623444	gene10119	X	+
chr6S	79289774	79289775	gene1012	X	+
chr8L	56083573	56083574	gene10120	X	+
chrUn_NW_016694833v1	1567599	1567600	gene10121	X	+
chr4L	126530116	126530117	gene10122	X	+
chr1S	56555284	56555285	gene10123	X	+
chr9_10S	95381864	95381865	gene10124	X	+
chr4S	86532382	86532383	gene10125	.	+
chr6S	5399984	5399985	gene10126	X	-
chr7S	3709550	3709551	gene10127	.	-
chr6S	19164089	19164090	gene10128	X	+
chr8L	57883939	57883940	gene10129	X	+
chrUn_NW_016694813v1	1103534	1103535	gene1013	X	-
chr6S	1284705	1284706	gene10130	X	+
chr2L	164850141	164850142	gene10131	X	-
chr3S	119469644	119469645	gene10132	X	-
chr7L	122369270	122369271	gene10133	X	+
chr5L	5293081	5293082	gene10134	X	-
chr9_10L	8627253	8627254	gene10135	X	+
chr8S	97074535	97074536	gene10136	X	+
chr6L	52155724	52155725	gene10137	.	-
chr1L	151282468	151282469	gene10138	X	-
chr1L	138071844	138071845	gene10139	X	-
chr2S	51503668	51503669	gene1014	.	+
chr2S	57132073	57132074	gene10140	X	+
chr2S	77811830	77811831	gene10141	X	+
chr4S	58125258	58125259	gene10142	X	+
chr3L	38577285	38577286	gene10143	X	+
chrUn_NW_016694812v1	4443768	4443769	gene10144	X	-
chr4S	80725997	80725998	gene10145	X	-
chr2L	87264097	87264098	gene10146	X	-
chr2S	78377660	78377661	gene10147	X	-
chr4L	2567762	2567763	gene10148	X	-
chr4S	67096797	67096798	gene10149	X	+
chr9_10L	3596875	3596876	gene1015	X	+
chr1L	132954898	132954899	gene10150	X	-
chr3L	29326406	29326407	gene10151	.	+
chr8L	33820647	33820648	gene10152	X	-
chr1S	93499378	93499379	gene10153	X	+
chr6L	73947674	73947675	gene10154	.	+
chr8S	3780515	3780516	gene10155	X	+
chr1L	185338511	185338512	gene10156	X	+
chr4S	64677382	64677383	gene10157	X	-
chr3L	135383514	135383515	gene10158	.	+
chr5L	158670093	158670094	gene10159	X	+
chr4L	1180712	1180713	gene1016	X	-
chr8S	93450841	93450842	gene10160	X	+
chr4L	28137136	28137137	gene10161	X	+
chr9_10L	65597419	65597420	gene10162	X	+
chr9_10L	48936918	48936919	gene10163	.	-
chr7L	98199637	98199638	gene10164	.	+
chr5S	85526949	85526950	gene10165	.	+
chr2S	92298333	92298334	gene10166	X	+
chrUn_NW_016694833v1	1611487	1611488	gene10167	X	-
chr5L	149075184	149075185	gene10168	X	-
chr8L	45541452	45541453	gene10169	.	+
chr2L	98951823	98951824	gene1017	X	+
chrUn_NW_016694863v1	278069	278070	gene10170	X	+
chr2L	167498242	167498243	gene10171	.	-
chr4L	100066776	100066777	gene10172	X	+
chr1S	115490241	115490242	gene10173	X	-
chrUn_NW_016694813v1	1861726	1861727	gene10174	X	-
chr5L	15833084	15833085	gene10175	X	+
chr1L	167731519	167731520	gene10176	X	+
chr6S	30916085	30916086	gene10177	X	-
chr8S	26302005	26302006	gene10178	X	-
chr4L	11613792	11613793	gene10179	X	-
chr9_10L	3500870	3500871	gene1018	X	-
chr1S	160147878	160147879	gene10180	X	+
chr3L	90621745	90621746	gene10181	X	+
chr2S	58188174	58188175	gene10182	.	-
chr7L	106235934	106235935	gene10183	X	-
chr9_10S	5235	5236	gene10184	X	+
chr4L	122247121	122247122	gene10185	.	-
chr9_10L	41907576	41907577	gene10186	X	+
chr1L	103159833	103159834	gene10187	X	-
chr1L	124965279	124965280	gene10188	X	+
chrUn_NW_016694812v1	2772390	2772391	gene10189	.	+
chr5L	131638307	131638308	gene1019	X	+
chr1S	29652347	29652348	gene10190	X	+
chr7S	31558713	31558714	gene10191	X	-
chr6L	92215315	92215316	gene10192	X	+
chr2L	151773282	151773283	gene10193	.	+
chr3L	94444934	94444935	gene10194	X	+
chr2S	125843857	125843858	gene10195	X	-
chr3L	141474433	141474434	gene10196	X	-
chr8L	116976484	116976485	gene10197	X	-
chr1L	142468013	142468014	gene10198	X	-
chr8L	99333840	99333841	gene10199	X	-
chr8L	30362124	30362125	gene102	X	+
chr8L	70754135	70754136	gene1020	X	+
chr1S	128397937	128397938	gene10200	X	+
chr9_10L	44758538	44758539	gene10201	.	+
chr6L	270383	270384	gene10202	X	+
chr7L	58775256	58775257	gene10203	X	-
chr7L	33598726	33598727	gene10204	.	-
chr7S	4544493	4544494	gene10205	X	-
chrUn_NW_016699419v1	111	112	gene10206	.	+
chr4L	124195094	124195095	gene10207	X	+
chr7L	56155841	56155842	gene10208	.	+
chr2S	86053331	86053332	gene10209	X	-
chr6S	71488230	71488231	gene1021	X	-
chr1L	164665842	164665843	gene10210	.	+
chr3S	58906759	58906760	gene10211	X	+
chr7L	121169707	121169708	gene10212	X	+
chrUn_NW_016694830v1	106635	106636	gene10213	.	-
chr8L	92647785	92647786	gene10214	X	-
chr6L	4103575	4103576	gene10215	X	-
chr1L	205797246	205797247	gene10216	X	-
chr6L	120084406	120084407	gene10217	.	-
chr3S	89003501	89003502	gene10218	X	+
chrUn_NW_016694813v1	2047883	2047884	gene10219	X	+
chr3L	79533261	79533262	gene1022	X	+
chr3L	54714842	54714843	gene10220	X	+
chr2L	159645804	159645805	gene10221	.	+
chr1L	7451217	7451218	gene10222	.	-
chr2L	35010443	35010444	gene10223	X	-
chr9_10S	74448616	74448617	gene10224	.	-
chr6S	66748770	66748771	gene10225	X	-
chr2L	145313535	145313536	gene10226	X	-
chr1L	20717329	20717330	gene10227	.	-
chr1L	118685019	118685020	gene10228	X	+
chr2L	42293072	42293073	gene10229	X	+
chr2L	46705008	46705009	gene1023	X	+
chr9_10L	50172312	50172313	gene10230	.	+
chr4L	76025366	76025367	gene10231	.	-
chr1L	76096543	76096544	gene10232	X	+
chr7S	80073781	80073782	gene10233	X	-
chr7S	10393696	10393697	gene10234	X	+
chr2L	103721770	103721771	gene10235	.	+
chr9_10S	4777655	4777656	gene10236	X	-
chr4L	38500742	38500743	gene10237	X	-
chr1S	55092543	55092544	gene10238	X	+
chr3S	12704724	12704725	gene10239	X	-
chrUn_NW_016694842v1	135970	135971	gene1024	.	+
chr2S	97518111	97518112	gene10240	.	+
chr9_10S	40241777	40241778	gene10241	.	-
chr9_10L	92148307	92148308	gene10242	X	+
chr8L	38305803	38305804	gene10243	X	-
chr8S	57105971	57105972	gene10244	.	-
chr9_10S	40716257	40716258	gene10245	X	+
chr3L	45230030	45230031	gene10246	X	+
chr3L	79863321	79863322	gene10247	X	+
chr1S	94702957	94702958	gene10248	X	+
chr9_10S	31993232	31993233	gene10249	X	-
chr7L	1795260	1795261	gene1025	X	+
chr3L	42327237	42327238	gene10250	.	-
chr1L	73578904	73578905	gene10251	X	-
chr9_10L	77930834	77930835	gene10252	.	-
chr1L	152813849	152813850	gene10253	X	-
chr8L	52511550	52511551	gene10254	X	+
chr4L	51144985	51144986	gene10255	.	-
chr7L	89476036	89476037	gene10256	.	+
chr3S	20797484	20797485	gene10257	.	+
chr1L	144235607	144235608	gene10258	X	+
chr2L	152875625	152875626	gene10259	X	+
chr8L	38455100	38455101	gene1026	.	+
chr4S	10265811	10265812	gene10260	X	-
chr4L	115327261	115327262	gene10261	X	+
chr5L	86973240	86973241	gene10262	X	+
chr1L	102030290	102030291	gene10263	X	+
chr3L	24729809	24729810	gene10264	X	-
chr2L	44599293	44599294	gene10265	X	-
chr1S	89787906	89787907	gene10266	.	-
chr5L	116040626	116040627	gene10267	X	-
chr7L	113873304	113873305	gene10268	X	+
chr1L	137956167	137956168	gene10269	X	+
chr4S	3589189	3589190	gene1027	X	+
chr3L	57717493	57717494	gene10270	X	-
chr3S	70365259	70365260	gene10271	X	+
chr2S	79214297	79214298	gene10272	X	-
chr1L	110733503	110733504	gene10273	.	-
chr5S	1934565	1934566	gene10274	X	-
chr2S	94521138	94521139	gene10275	X	+
chrUn_NW_016694815v1	1929895	1929896	gene10276	.	+
chr1L	40689983	40689984	gene10277	X	+
chr3L	41670659	41670660	gene10278	X	-
chr6L	68106793	68106794	gene10279	X	-
chr4L	16002160	16002161	gene1028	.	-
chr8S	94020273	94020274	gene10280	.	+
chr3L	117920586	117920587	gene10281	.	+
chr9_10S	26746325	26746326	gene10282	.	-
chr2L	46733625	46733626	gene10283	X	+
chr1L	88237832	88237833	gene10284	X	+
chr3L	24548507	24548508	gene10285	X	-
chr4S	12354939	12354940	gene10286	X	+
chr4S	95058561	95058562	gene10287	.	-
chr8L	117364207	117364208	gene10288	X	+
chr2S	59023046	59023047	gene10289	.	-
chrUn_NW_016694810v1	3332435	3332436	gene1029	X	+
chr9_10L	1109145	1109146	gene10290	.	+
chr2S	139789031	139789032	gene10291	X	+
chr7S	79962412	79962413	gene10292	.	-
chr5L	149167768	149167769	gene10293	X	+
chr6L	6563137	6563138	gene10294	.	+
chr9_10S	40770816	40770817	gene10295	.	+
chr5L	84806789	84806790	gene10296	X	+
chr9_10L	106789874	106789875	gene10297	X	+
chr7L	106123014	106123015	gene10298	X	-
chr1L	44727419	44727420	gene10299	X	+
chr4S	97480435	97480436	gene103	.	+
chr3L	47961608	47961609	gene1030	.	-
chr8L	82995618	82995619	gene10300	.	+
chr3S	583283	583284	gene10301	.	+
chr4S	104513826	104513827	gene10302	.	+
chr2S	143853891	143853892	gene10303	X	+
chr3S	87074788	87074789	gene10304	.	+
chrUn_NW_016694822v1	1956040	1956041	gene10305	.	-
chr6L	18024889	18024890	gene10306	X	+
chrUn_NW_016694820v1	1928009	1928010	gene10307	X	+
chr1L	136954	136955	gene10308	X	-
chr5L	96333905	96333906	gene10309	X	-
chr7L	6970799	6970800	gene1031	X	+
chr2L	140662345	140662346	gene10310	X	-
chr4L	76234392	76234393	gene10311	X	+
chr5L	97617796	97617797	gene10312	X	-
chr3S	88630057	88630058	gene10313	X	+
chr4L	85939432	85939433	gene10314	X	-
chr1L	163491081	163491082	gene10315	X	+
chr1L	169557347	169557348	gene10316	X	+
chr7S	61940748	61940749	gene10317	X	-
chr7L	103987264	103987265	gene10318	X	+
chr7L	100462136	100462137	gene10319	.	-
chr3L	51399097	51399098	gene1032	X	-
chr2S	80843330	80843331	gene10320	X	-
chr4L	29612325	29612326	gene10321	X	+
chrUn_NW_016694827v1	1667563	1667564	gene10322	X	-
chr9_10L	85737196	85737197	gene10323	X	-
chr8S	77678634	77678635	gene10324	X	-
chr5L	14869397	14869398	gene10325	X	+
chr7L	105574570	105574571	gene10326	X	+
chr4L	1122753	1122754	gene10327	X	-
chrUn_NW_016694821v1	68524	68525	gene10328	X	+
chr1S	92357358	92357359	gene10329	X	-
chrUn_NW_016694811v1	3943125	3943126	gene1033	X	-
chr1L	168557053	168557054	gene10330	X	-
chr9_10S	102520813	102520814	gene10331	.	-
chr3L	41229292	41229293	gene10332	X	-
chr1L	112561445	112561446	gene10333	X	-
chr5S	34361911	34361912	gene10334	.	-
chr1L	18531869	18531870	gene10335	X	+
chr8S	52702635	52702636	gene10336	.	-
chr8L	55823755	55823756	gene10337	X	-
chr6S	78138977	78138978	gene10338	X	-
chr5L	75944692	75944693	gene10339	.	-
chr3S	88159439	88159440	gene1034	X	-
chr4L	4597173	4597174	gene10340	X	+
chr2L	84407984	84407985	gene10341	X	+
chr1L	128759157	128759158	gene10342	X	+
chr9_10S	77221872	77221873	gene10343	X	+
chr4L	79868299	79868300	gene10344	X	+
chr2L	141507702	141507703	gene10345	X	-
chr8L	69011850	69011851	gene10346	.	+
chr4L	48317309	48317310	gene10347	X	+
chr7S	67161399	67161400	gene10348	X	-
chr9_10L	5135468	5135469	gene10349	X	+
chr4L	72113662	72113663	gene1035	X	-
chr4L	76916325	76916326	gene10350	.	+
chr2L	17462954	17462955	gene10351	X	+
chr9_10S	95243933	95243934	gene10352	X	+
chr3L	1705442	1705443	gene10353	X	+
chr1S	127274512	127274513	gene10354	X	-
chr8S	19970306	19970307	gene10355	X	+
chr8L	15763531	15763532	gene10356	X	-
chr5L	123053500	123053501	gene10357	X	+
chr9_10S	97649845	97649846	gene10358	.	+
chr1L	103998112	103998113	gene10359	X	-
chr2L	29365173	29365174	gene1036	.	-
chr9_10L	85286245	85286246	gene10360	X	-
chr6L	154782269	154782270	gene10361	X	+
chr7L	99531687	99531688	gene10362	X	+
chr1L	215332403	215332404	gene10363	X	-
chr9_10L	2984383	2984384	gene10364	X	-
chr8L	113461218	113461219	gene10365	.	+
chr2S	137122473	137122474	gene10366	X	-
chr3L	126958860	126958861	gene10367	X	-
chr5L	30414052	30414053	gene10368	X	-
chr8L	50988096	50988097	gene10369	X	-
chr2L	1983858	1983859	gene1037	X	-
chr6S	127167103	127167104	gene10370	X	-
chr4S	79869504	79869505	gene10371	X	-
chr4S	79513740	79513741	gene10372	X	-
chr2S	132767879	132767880	gene10373	X	+
chr2L	81208127	81208128	gene10374	X	+
chr7L	73310981	73310982	gene10375	.	+
chr6L	152975385	152975386	gene10376	X	-
chr9_10L	91097364	91097365	gene10377	X	-
chr6L	83449	83450	gene10378	X	+
chr2S	19994322	19994323	gene10379	X	-
chr9_10S	103550436	103550437	gene1038	.	-
chr4S	94908767	94908768	gene10380	X	-
chr2L	118635821	118635822	gene10381	X	+
chr5L	22777165	22777166	gene10382	X	-
chr4L	21761278	21761279	gene10383	X	+
chr9_10L	46684017	46684018	gene10384	X	-
chr2L	159473174	159473175	gene10385	X	-
chr4S	1761607	1761608	gene10386	X	-
chr6L	118775076	118775077	gene10387	X	-
chr7S	82534418	82534419	gene10388	.	-
chr8L	97896463	97896464	gene10389	X	-
chr1S	33901809	33901810	gene1039	X	-
chr1S	119797330	119797331	gene10390	X	-
chr4S	96739719	96739720	gene10391	X	-
chr7S	24960940	24960941	gene10392	.	-
chr8L	14944226	14944227	gene10393	.	+
chr4L	79913277	79913278	gene10394	X	+
chr9_10L	112588962	112588963	gene10395	X	+
chr2L	114625993	114625994	gene10396	X	-
chr4L	83706696	83706697	gene10397	.	-
chr8S	9919858	9919859	gene10398	X	-
chr7S	83944839	83944840	gene10399	X	-
chr9_10S	99287233	99287234	gene104	X	+
chr2L	170437762	170437763	gene1040	X	+
chr4L	63550160	63550161	gene10400	X	-
chr9_10S	90396030	90396031	gene10401	X	-
chr6L	95750764	95750765	gene10402	X	+
chr3S	48877079	48877080	gene10403	X	+
chr7L	59820580	59820581	gene10404	X	-
chr8S	5522432	5522433	gene10405	X	-
chr7L	111930431	111930432	gene10406	.	+
chr4S	105880665	105880666	gene10407	X	+
chr6L	124380357	124380358	gene10408	X	-
chr1L	218886897	218886898	gene10409	X	-
chr8L	1016489	1016490	gene1041	.	-
chr8S	65923593	65923594	gene10410	X	-
chr2S	137423778	137423779	gene10411	X	+
chr5L	154652854	154652855	gene10412	X	+
chr4S	6079359	6079360	gene10413	X	-
chrUn_NW_016694816v1	697992	697993	gene10414	.	+
chr3S	10443514	10443515	gene10415	X	+
chr8S	55997078	55997079	gene10416	X	+
chr1S	52669726	52669727	gene10417	X	-
chr5S	22229539	22229540	gene10418	.	+
chr1L	151221497	151221498	gene10419	X	-
chr2L	142608974	142608975	gene1042	X	-
chrUn_NW_016694820v1	1670533	1670534	gene10420	.	+
chr1L	99892132	99892133	gene10421	X	+
chr6S	1924495	1924496	gene10422	X	-
chr3L	38416976	38416977	gene10423	X	+
chr1L	38661527	38661528	gene10424	X	+
chr6L	94937048	94937049	gene10425	X	+
chr9_10L	35811745	35811746	gene10426	.	+
chr4L	133724976	133724977	gene10427	X	-
chr2L	46320722	46320723	gene10428	X	+
chr8L	24131970	24131971	gene10429	X	-
chrUn_NW_016694837v1	220330	220331	gene1043	X	+
chr2L	87806795	87806796	gene10430	X	+
chr1S	169598881	169598882	gene10431	.	-
chrUn_NW_016694888v1	222312	222313	gene10432	X	-
chr8S	80335255	80335256	gene10433	X	+
chr3S	65583282	65583283	gene10434	X	+
chr8L	56246091	56246092	gene10435	X	-
chr7L	43354429	43354430	gene10436	.	+
chr2L	107626007	107626008	gene10437	.	+
chr2S	42683263	42683264	gene10438	.	+
chr2L	41467255	41467256	gene10439	X	-
chr6S	14567102	14567103	gene1044	X	+
chr6L	2906849	2906850	gene10440	X	-
chr9_10S	76461800	76461801	gene10441	X	-
chr4L	55929876	55929877	gene10442	.	-
chr1L	6457687	6457688	gene10443	X	-
chr2S	103755669	103755670	gene10444	X	+
chr4S	39626462	39626463	gene10445	.	+
chrUn_NW_016694811v1	6923157	6923158	gene10446	.	-
chr2S	23946583	23946584	gene10447	X	+
chr9_10S	32684556	32684557	gene10448	X	+
chr8L	23461121	23461122	gene10449	X	-
chr4L	65065406	65065407	gene1045	X	+
chr6S	55900303	55900304	gene10450	X	+
chr5L	49123680	49123681	gene10451	.	-
chr6S	26694857	26694858	gene10452	X	+
chr4L	63730945	63730946	gene10453	X	-
chr7S	9994745	9994746	gene10454	X	+
chr6L	125583545	125583546	gene10455	X	-
chr6L	6656542	6656543	gene10456	X	-
chr7L	108682672	108682673	gene10457	X	+
chr2L	13610622	13610623	gene10458	X	+
chr7S	22472788	22472789	gene10459	X	+
chr2S	116949468	116949469	gene1046	X	+
chr7L	31617978	31617979	gene10460	X	-
chr4L	2576331	2576332	gene10461	X	-
chr2S	59572054	59572055	gene10462	X	+
chr3S	27079278	27079279	gene10463	X	-
chr6L	83792106	83792107	gene10464	X	-
chr2L	149144882	149144883	gene10465	X	+
chr4S	95849685	95849686	gene10466	X	+
chr6S	64961760	64961761	gene10467	X	-
chr2S	15198029	15198030	gene10468	.	+
chrUn_NW_016694936v1	25058	25059	gene10469	.	-
chr4L	186201	186202	gene1047	X	-
chr5L	16249418	16249419	gene10470	X	-
chr2L	150889121	150889122	gene10471	.	+
chr3S	47514735	47514736	gene10472	X	+
chr5S	84134044	84134045	gene10473	.	-
chr9_10S	34209008	34209009	gene10474	X	+
chr7L	6660633	6660634	gene10475	X	-
chr2S	57549395	57549396	gene10476	X	+
chr1L	173816559	173816560	gene10477	X	+
chr4S	14288416	14288417	gene10478	X	-
chr8L	108051002	108051003	gene10479	X	+
chr4L	41970944	41970945	gene1048	X	+
chr5L	139125335	139125336	gene10480	X	+
chr9_10S	46591214	46591215	gene10481	X	+
chr8L	119275081	119275082	gene10482	.	-
chr1S	173228310	173228311	gene10483	X	+
chr3L	41243770	41243771	gene10484	X	-
chr8L	21037653	21037654	gene10485	X	+
chr9_10S	6695690	6695691	gene10486	X	+
chr9_10S	67007227	67007228	gene10487	.	-
chrUn_NW_016694810v1	8320251	8320252	gene10488	X	+
chrUn_NW_016694812v1	3492636	3492637	gene10489	X	-
chr2L	34658989	34658990	gene1049	X	+
chr1L	131968511	131968512	gene10490	X	-
chr7L	85845650	85845651	gene10491	X	-
chr8L	56305879	56305880	gene10492	X	+
chr9_10L	43638681	43638682	gene10493	X	+
chr4L	23273690	23273691	gene10494	X	-
chr8S	31341229	31341230	gene10495	X	-
chr9_10L	10775151	10775152	gene10496	X	+
chr1L	202572259	202572260	gene10497	.	+
chr1L	139155612	139155613	gene10498	.	-
chr6L	52301099	52301100	gene10499	X	+
chr7L	74566135	74566136	gene105	X	+
chr6L	56877429	56877430	gene1050	.	-
chr7L	87420618	87420619	gene10500	X	+
chr7L	33860377	33860378	gene10501	X	-
chr8S	1900953	1900954	gene10502	X	-
chr1L	77178531	77178532	gene10503	.	+
chr7S	51618640	51618641	gene10504	X	-
chr1L	118854182	118854183	gene10505	.	+
chr7S	63769090	63769091	gene10506	X	+
chr7L	119620630	119620631	gene10507	X	+
chrUn_NW_016694811v1	1055861	1055862	gene10508	.	+
chr7S	62855866	62855867	gene10509	X	-
chr3L	97989705	97989706	gene1051	X	+
chr7L	73441373	73441374	gene10510	X	-
chr8S	15550314	15550315	gene10511	X	-
chr2L	92147336	92147337	gene10512	.	+
chr1L	127656813	127656814	gene10513	X	+
chr7L	97387341	97387342	gene10514	X	-
chr1S	104500246	104500247	gene10515	X	+
chr8S	5243694	5243695	gene10516	X	+
chr1L	47085205	47085206	gene10517	X	+
chr3S	115371570	115371571	gene10518	X	-
chr6L	145893278	145893279	gene10519	X	-
chr9_10S	25336213	25336214	gene1052	X	-
chr3L	79028559	79028560	gene10520	X	+
chr9_10L	74010060	74010061	gene10521	X	+
chr3S	45510694	45510695	gene10522	.	-
chr7S	74705890	74705891	gene10523	X	+
chr3L	79821483	79821484	gene10524	.	+
chrUn_NW_016694819v1	2823951	2823952	gene10525	X	+
chr5S	30567419	30567420	gene10526	X	-
chr9_10L	18299552	18299553	gene10527	X	-
chr4L	23829640	23829641	gene10528	X	-
chr7L	25270097	25270098	gene10529	X	-
chr9_10L	104906611	104906612	gene1053	X	-
chr3S	34404304	34404305	gene10530	X	+
chr9_10S	78623680	78623681	gene10531	X	-
chr8S	77335453	77335454	gene10532	X	+
chr1S	137674238	137674239	gene10533	X	+
chr7L	105483021	105483022	gene10534	.	+
chr4S	62710610	62710611	gene10535	X	-
chr4L	105452980	105452981	gene10536	.	-
chr3L	38517401	38517402	gene10537	X	-
chr1L	29797452	29797453	gene10538	.	-
chr1L	175772542	175772543	gene10539	X	+
chr6L	153527496	153527497	gene1054	X	-
chr7L	17575715	17575716	gene10540	X	+
chr6L	153582130	153582131	gene10541	X	-
chr4S	27146796	27146797	gene10542	.	+
chr5L	37765475	37765476	gene10543	X	+
chr9_10L	85656176	85656177	gene10544	X	-
chr8L	106516385	106516386	gene10545	X	+
chr6L	36626461	36626462	gene10546	X	+
chr2S	103131085	103131086	gene10547	X	-
chr9_10L	112836535	112836536	gene10548	.	-
chr1L	189836404	189836405	gene10549	X	-
chr1L	141810481	141810482	gene1055	X	-
chr8S	15501864	15501865	gene10550	X	+
chr2S	54576379	54576380	gene10551	X	+
chr9_10S	6250136	6250137	gene10552	.	-
chr7S	75852793	75852794	gene10553	X	-
chr9_10S	55211523	55211524	gene10554	X	+
chr5L	37911249	37911250	gene10555	X	+
chr3S	1418478	1418479	gene10556	X	-
chr1L	22503251	22503252	gene10557	X	+
chr9_10S	100925310	100925311	gene10558	X	-
chr9_10L	4334703	4334704	gene10559	X	-
chr2L	87116769	87116770	gene1056	X	-
chr7S	71927076	71927077	gene10560	X	+
chrUn_NW_016694827v1	1111809	1111810	gene10561	X	+
chr8L	115987822	115987823	gene10562	X	+
chr4S	1829516	1829517	gene10563	X	-
chr9_10L	52515315	52515316	gene10564	X	+
chr7L	97002084	97002085	gene10565	X	+
chr2S	49544525	49544526	gene10566	X	-
chr4S	3544156	3544157	gene10567	X	+
chr1S	86785446	86785447	gene10568	.	+
chr3S	71851948	71851949	gene10569	X	-
chr2L	164299799	164299800	gene1057	X	+
chr3S	88582356	88582357	gene10570	X	+
chr2L	159073064	159073065	gene10571	X	-
chr4S	78923195	78923196	gene10572	X	-
chr2S	123245808	123245809	gene10573	X	+
chr1L	112244315	112244316	gene10574	X	+
chr2L	53518993	53518994	gene10575	X	+
chr6L	54415774	54415775	gene10576	X	+
chr1L	193291981	193291982	gene10577	X	+
chr1L	10111950	10111951	gene10578	X	+
chr6L	38168187	38168188	gene10579	X	+
chr3S	107644295	107644296	gene1058	X	-
chrUn_NW_016694813v1	2651008	2651009	gene10580	X	+
chr8S	80013301	80013302	gene10581	.	-
chr7L	121808002	121808003	gene10582	.	+
chr2S	78399069	78399070	gene10583	X	+
chrUn_NW_016695117v1	10	11	gene10584	.	+
chr3L	130300519	130300520	gene10585	X	+
chr1S	21847816	21847817	gene10586	.	+
chr2S	24231680	24231681	gene10587	X	-
chr4L	125949171	125949172	gene10588	X	+
chr9_10L	61819922	61819923	gene10589	.	-
chrUn_NW_016695100v1	12029	12030	gene1059	.	+
chr2S	64852339	64852340	gene10590	X	+
chr3L	37348473	37348474	gene10591	.	+
chr1S	170307606	170307607	gene10592	X	+
chr4L	50676276	50676277	gene10593	X	+
chr8L	6785066	6785067	gene10594	X	+
chr3L	97797773	97797774	gene10595	.	+
chr2L	180610501	180610502	gene10596	.	+
chr1S	90111865	90111866	gene10597	X	-
chr2S	63985392	63985393	gene10598	X	+
chr3L	7858204	7858205	gene10599	X	+
chr6L	31951323	31951324	gene106	X	-
chr5L	54095262	54095263	gene1060	.	-
chr4S	40655262	40655263	gene10600	X	-
chr5L	112708158	112708159	gene10601	.	+
chr8L	15188617	15188618	gene10602	.	-
chr6L	122865292	122865293	gene10603	X	+
chr1L	136648779	136648780	gene10604	.	-
chr9_10L	13374324	13374325	gene10605	X	+
chr9_10L	85170666	85170667	gene10606	X	+
chr9_10L	93810998	93810999	gene10607	X	+
chr7L	85929800	85929801	gene10608	X	+
chr4L	86700197	86700198	gene10609	.	+
chrUn_NW_016694842v1	625893	625894	gene1061	X	-
chr9_10S	103694195	103694196	gene10610	X	-
chr5L	6706661	6706662	gene10611	.	+
chr2S	62192719	62192720	gene10612	X	+
chr8S	71865570	71865571	gene10613	X	+
chr9_10S	1832510	1832511	gene10614	.	-
chr2L	48798906	48798907	gene10615	.	+
chr4S	71224854	71224855	gene10616	.	-
chr4L	122229808	122229809	gene10617	X	-
chr9_10S	101393809	101393810	gene10618	X	-
chr6L	114602062	114602063	gene10619	.	-
chr6L	58222176	58222177	gene1062	X	-
chr4S	78664794	78664795	gene10620	X	-
chr8S	78606036	78606037	gene10621	X	-
chr8L	12994521	12994522	gene10622	.	+
chr2S	92636149	92636150	gene10623	.	-
chr9_10L	94554804	94554805	gene10624	X	+
chr2L	103479116	103479117	gene10625	X	+
chr7L	59542443	59542444	gene10626	X	-
chr1L	73360700	73360701	gene10627	X	-
chr8L	113488968	113488969	gene10628	X	+
chr7L	112506531	112506532	gene10629	.	+
chr1L	139750718	139750719	gene1063	.	-
chr5L	80313958	80313959	gene10630	X	+
chr1S	10825761	10825762	gene10631	X	+
chr5L	31516765	31516766	gene10632	X	+
chr8S	39912305	39912306	gene10633	X	+
chr1L	90522697	90522698	gene10634	X	+
chr7L	109343200	109343201	gene10635	X	-
chr9_10S	15037871	15037872	gene10636	X	+
chr6S	6150148	6150149	gene10637	.	-
chr6S	46023186	46023187	gene10638	X	+
chr6S	12258806	12258807	gene10639	.	-
chrUn_NW_016694820v1	2523198	2523199	gene1064	X	-
chr1S	463862	463863	gene10640	X	+
chr1L	53137665	53137666	gene10641	.	-
chr7L	5088490	5088491	gene10642	X	+
chr9_10S	70460912	70460913	gene10643	X	-
chr8L	81736436	81736437	gene10644	X	-
chr2L	142269489	142269490	gene10645	X	+
chr5S	13247115	13247116	gene10646	X	-
chr7L	61119053	61119054	gene10647	X	+
chr5S	98197600	98197601	gene10648	.	-
chrUn_NW_016694811v1	7924378	7924379	gene10649	X	-
chr6S	97531303	97531304	gene1065	X	-
chr2L	174728936	174728937	gene10650	.	-
chr3L	90621573	90621574	gene10651	X	-
chr6L	111621095	111621096	gene10652	X	+
chr4L	44616568	44616569	gene10653	.	-
chr3L	122762401	122762402	gene10654	X	+
chr3S	30332550	30332551	gene10655	.	+
chr6L	114421768	114421769	gene10656	X	+
chr8L	91191207	91191208	gene10657	X	+
chr6L	130552392	130552393	gene10658	X	-
chr5L	102466971	102466972	gene10659	X	-
chr8S	1021511	1021512	gene1066	.	-
chr8L	77569536	77569537	gene10660	X	-
chr9_10L	77320543	77320544	gene10661	.	-
chrUn_NW_016694813v1	1010497	1010498	gene10662	X	-
chr2S	156466357	156466358	gene10663	X	-
chr1L	60207577	60207578	gene10664	.	-
chr8L	81376050	81376051	gene10665	X	-
chr4L	58318359	58318360	gene10666	X	-
chr4S	39276415	39276416	gene10667	X	-
chr4L	139332368	139332369	gene10668	X	-
chr5L	89572969	89572970	gene10669	X	-
chr6S	79553799	79553800	gene1067	.	-
chrUn_NW_016694811v1	5455856	5455857	gene10670	.	-
chr1S	135403132	135403133	gene10671	X	+
chr2L	172247715	172247716	gene10672	X	-
chr2L	161863067	161863068	gene10673	X	+
chr1S	21545884	21545885	gene10674	X	-
chr3L	85454547	85454548	gene10675	X	-
chr1L	177697772	177697773	gene10676	X	+
chr1L	5499037	5499038	gene10677	X	+
chr7L	24594284	24594285	gene10678	.	-
chr7L	13299222	13299223	gene10679	X	+
chr7L	10989889	10989890	gene1068	X	-
chr5L	43227799	43227800	gene10680	.	-
chr1L	68078774	68078775	gene10681	X	+
chr7S	62608376	62608377	gene10682	X	+
chr8L	57697165	57697166	gene10683	X	+
chr3L	109928821	109928822	gene10684	X	+
chr2S	98698646	98698647	gene10685	X	-
chr9_10S	15384400	15384401	gene10686	X	-
chr4S	104762503	104762504	gene10687	X	-
chr6S	121099102	121099103	gene10688	.	-
chr1S	4544422	4544423	gene10689	X	-
chrUn_NW_016694820v1	1520221	1520222	gene1069	X	+
chr7L	79077982	79077983	gene10690	X	+
chr4L	57716238	57716239	gene10691	X	-
chr1S	90146609	90146610	gene10692	X	-
chr5L	24016010	24016011	gene10693	.	+
chr5L	137583687	137583688	gene10694	X	+
chr3L	17389196	17389197	gene10695	.	+
chr7S	8669028	8669029	gene10696	.	+
chr9_10S	30451460	30451461	gene10697	X	+
chr2S	87608980	87608981	gene10698	X	-
chr2S	56135638	56135639	gene10699	.	+
chr8L	102544682	102544683	gene107	X	+
chr5S	17977048	17977049	gene1070	X	-
chr1L	21687866	21687867	gene10700	.	+
chr8L	618150	618151	gene10701	X	+
chr9_10L	113026660	113026661	gene10702	X	-
chr6L	63148638	63148639	gene10703	X	+
chr6L	21558430	21558431	gene10704	X	-
chr3S	59569163	59569164	gene10705	X	-
chr9_10S	9555729	9555730	gene10706	X	+
chr4L	99919911	99919912	gene10707	.	+
chr2L	139921570	139921571	gene10708	X	+
chr3S	60223642	60223643	gene10709	X	+
chr4L	8455912	8455913	gene1071	.	+
chr4L	41545547	41545548	gene10710	X	+
chr4L	24354210	24354211	gene10711	X	-
chr1S	179845555	179845556	gene10712	X	-
chr3L	40457556	40457557	gene10713	X	-
chr6L	125916759	125916760	gene10714	X	+
chr3L	5471360	5471361	gene10715	X	-
chrUn_NW_016694857v1	555537	555538	gene10716	X	+
chr8S	13276659	13276660	gene10717	X	-
chr1S	125464623	125464624	gene10718	X	-
chr7S	212157	212158	gene10719	X	+
chr3L	129270239	129270240	gene1072	X	+
chr7L	104416254	104416255	gene10720	X	+
chr8S	83945202	83945203	gene10721	X	+
chr1S	41715056	41715057	gene10722	X	-
chr2L	103311260	103311261	gene10723	X	-
chr5L	92553681	92553682	gene10724	X	+
chr8S	70440903	70440904	gene10725	.	-
chr3L	39127220	39127221	gene10726	X	+
chrUn_NW_016694888v1	357349	357350	gene10727	X	-
chr5L	44279350	44279351	gene10728	X	+
chr1S	39019358	39019359	gene10729	X	+
chr5S	3093681	3093682	gene1073	X	-
chr4L	41139660	41139661	gene10730	X	-
chr6S	26794166	26794167	gene10731	X	+
chr3L	118310867	118310868	gene10732	.	+
chr2S	22862245	22862246	gene10733	.	+
chr5S	21885703	21885704	gene10734	.	+
chr1L	212322264	212322265	gene10735	X	-
chr5L	137968561	137968562	gene10736	X	+
chr2L	30937170	30937171	gene10737	X	+
chr1L	200151868	200151869	gene10738	X	+
chr2L	84368303	84368304	gene10739	X	+
chr7L	35739002	35739003	gene1074	X	-
chr5L	109373673	109373674	gene10740	X	+
chr1S	119504	119505	gene10741	X	-
chr1L	107430065	107430066	gene10742	X	+
chr3S	59791617	59791618	gene10743	X	+
chr8L	47536979	47536980	gene10744	X	+
chr5S	47460442	47460443	gene10745	X	+
chr9_10L	45440811	45440812	gene10746	.	+
chr3L	50307491	50307492	gene10747	X	+
chr3S	7593327	7593328	gene10748	X	-
chr3S	98891703	98891704	gene10749	X	+
chr4S	72160654	72160655	gene1075	X	-
chr8S	25622063	25622064	gene10750	X	-
chr1S	150287396	150287397	gene10751	.	+
chr4S	114712766	114712767	gene10752	X	-
chr7L	60445221	60445222	gene10753	.	-
chr9_10L	84191420	84191421	gene10754	X	+
chrUn_NW_016694836v1	1242891	1242892	gene10755	X	+
chr1L	106227034	106227035	gene10756	X	-
chr4L	117459812	117459813	gene10757	X	+
chr3L	7597392	7597393	gene10758	X	-
chr7S	71922098	71922099	gene10759	X	-
chr9_10L	94517341	94517342	gene1076	X	+
chr8L	104529398	104529399	gene10760	X	-
chr2L	142310615	142310616	gene10761	.	+
chr9_10L	81792435	81792436	gene10762	.	+
chr1S	19041913	19041914	gene10763	X	-
chr7S	48910254	48910255	gene10764	X	-
chrUn_NW_016694812v1	3444521	3444522	gene10765	X	-
chr3L	15876303	15876304	gene10766	X	-
chr9_10L	14974791	14974792	gene10767	X	-
chr9_10S	16148318	16148319	gene10768	.	-
chr2S	159634972	159634973	gene10769	X	+
chr3S	1222590	1222591	gene1077	X	+
chr1L	138146577	138146578	gene10770	X	+
chr8S	78193817	78193818	gene10771	X	-
chrUn_NW_016694891v1	85640	85641	gene10772	.	+
chr7L	14931553	14931554	gene10773	.	-
chr3L	60922982	60922983	gene10774	X	-
chr3L	143135819	143135820	gene10775	.	-
chr9_10S	52388169	52388170	gene10776	X	+
chr1L	184802096	184802097	gene10777	X	-
chr3L	126488970	126488971	gene10778	.	-
chr8S	14077499	14077500	gene10779	X	+
chr1L	129142508	129142509	gene1078	X	+
chr6L	35495288	35495289	gene10780	.	+
chr8S	52297985	52297986	gene10781	X	+
chr7S	4980963	4980964	gene10782	.	-
chr4L	65088912	65088913	gene10783	X	+
chr7L	31203905	31203906	gene10784	X	-
chr1L	132211769	132211770	gene10785	.	-
chrUn_NW_016694872v1	424944	424945	gene10786	X	-
chr9_10L	93033726	93033727	gene10787	X	+
chrUn_NW_016765959v1	3	4	gene10788	.	+
chr4S	95595890	95595891	gene10789	.	-
chr8S	76669342	76669343	gene1079	X	-
chr6S	93269742	93269743	gene10790	X	+
chr2L	63426195	63426196	gene10791	.	+
chr4S	58300826	58300827	gene10792	X	-
chr3S	44203116	44203117	gene10793	.	-
chr9_10S	25659200	25659201	gene10794	X	-
chr9_10S	38293127	38293128	gene10795	X	-
chr6S	33188574	33188575	gene10796	X	+
chr7L	6850082	6850083	gene10797	X	-
chr2L	138176574	138176575	gene10798	X	+
chr7L	26167350	26167351	gene10799	X	-
chr2L	103366633	103366634	gene108	X	-
chr7L	1821404	1821405	gene1080	X	-
chrUn_NW_016694811v1	4041608	4041609	gene10800	X	+
chr4S	18448883	18448884	gene10801	X	+
chr7L	104493625	104493626	gene10802	.	-
chr9_10S	308047	308048	gene10803	.	+
chr2S	87577141	87577142	gene10804	X	+
chr3S	37702202	37702203	gene10805	X	+
chr3L	48727347	48727348	gene10806	X	+
chr8L	24994551	24994552	gene10807	.	-
chr9_10S	4862826	4862827	gene10808	.	-
chr3L	94297754	94297755	gene10809	X	+
chr9_10L	30229211	30229212	gene1081	.	-
chr3S	47751374	47751375	gene10810	X	+
chr9_10L	93306895	93306896	gene10811	X	+
chr1L	141937621	141937622	gene10812	X	+
chr9_10S	38181226	38181227	gene10813	X	+
chr8L	60202113	60202114	gene10814	X	+
chr5S	136182226	136182227	gene10815	X	-
chr6L	26320435	26320436	gene10816	X	+
chr4L	103415845	103415846	gene10817	X	+
chr3S	119574078	119574079	gene10818	.	-
chr4L	88175300	88175301	gene10819	X	+
chr2L	41968793	41968794	gene1082	.	+
chr5S	98937102	98937103	gene10820	.	+
chrUn_NW_016694832v1	571293	571294	gene10821	X	-
chr3S	1739	1740	gene10822	.	+
chr5L	22761577	22761578	gene10823	X	-
chr5L	154804114	154804115	gene10824	X	-
chrUn_NW_016694904v1	115712	115713	gene10825	X	-
chr6S	100654373	100654374	gene10826	.	+
chr9_10S	41500376	41500377	gene10827	X	+
chrUn_NW_016694826v1	386044	386045	gene10828	.	+
chr2S	92496326	92496327	gene10829	X	+
chrUn_NW_016695050v1	14607	14608	gene1083	X	+
chr8S	94221355	94221356	gene10830	X	+
chr1L	179445207	179445208	gene10831	X	-
chr5L	83523464	83523465	gene10832	X	+
chr5S	112244839	112244840	gene10833	.	-
chr2S	66256545	66256546	gene10834	X	+
chr3S	66227679	66227680	gene10835	.	+
chrUn_NW_016694899v1	83249	83250	gene10836	.	+
chr2L	89791027	89791028	gene10837	X	+
chr7L	25121700	25121701	gene10838	X	-
chr9_10S	83531857	83531858	gene10839	.	-
chr8S	25720613	25720614	gene1084	X	-
chr1L	147954829	147954830	gene10840	X	-
chr6S	44553463	44553464	gene10841	X	-
chr6L	54600948	54600949	gene10842	X	-
chr7S	83237567	83237568	gene10843	X	-
chr7L	14451560	14451561	gene10844	X	+
chr8S	91765778	91765779	gene10845	X	-
chr1S	121770690	121770691	gene10846	X	+
chr9_10L	86103353	86103354	gene10847	X	+
chr1S	89208674	89208675	gene10848	X	+
chr6L	129087304	129087305	gene10849	X	-
chr4L	44661203	44661204	gene1085	X	-
chr2L	51769736	51769737	gene10850	X	+
chr2S	107921212	107921213	gene10851	.	-
chr1L	117529146	117529147	gene10852	X	+
chr4L	107531381	107531382	gene10853	X	-
chr4L	121378491	121378492	gene10854	X	-
chr9_10S	62225925	62225926	gene10855	.	-
chr8L	60151626	60151627	gene10856	X	+
chr7S	34997912	34997913	gene10857	X	-
chr2L	179575005	179575006	gene10858	X	-
chr2S	121240672	121240673	gene10859	.	+
chr9_10L	101536072	101536073	gene1086	X	+
chr2L	79434842	79434843	gene10860	X	+
chr7L	75273794	75273795	gene10861	X	+
chr9_10S	101553296	101553297	gene10862	X	+
chr3S	63048653	63048654	gene10863	X	-
chr3L	98865743	98865744	gene10864	X	+
chr8L	1584860	1584861	gene10865	X	-
chr9_10S	26569165	26569166	gene10866	X	-
chrUn_NW_016694812v1	5508516	5508517	gene10867	X	-
chr4L	26586442	26586443	gene10868	X	-
chr1L	98194015	98194016	gene10869	.	+
chr7L	19007410	19007411	gene1087	X	-
chr3L	80322548	80322549	gene10870	X	-
chr6S	64608319	64608320	gene10871	.	+
chr2L	50116048	50116049	gene10872	.	+
chr7L	99912741	99912742	gene10873	.	+
chr5S	131934425	131934426	gene10874	X	-
chr3L	89025634	89025635	gene10875	X	+
chr7S	1363939	1363940	gene10876	X	-
chr6L	102044711	102044712	gene10877	X	-
chr9_10L	106470636	106470637	gene10878	X	+
chr9_10L	8502242	8502243	gene10879	X	-
chr1L	185527597	185527598	gene1088	.	+
chr8S	97722972	97722973	gene10880	X	-
chr9_10L	5723152	5723153	gene10881	X	+
chr5L	23866812	23866813	gene10882	X	+
chr2L	99074071	99074072	gene10883	.	-
chr9_10L	68858353	68858354	gene10884	X	-
chr4S	3327339	3327340	gene10885	X	+
chr6L	149079886	149079887	gene10886	X	-
chr2L	26942716	26942717	gene10887	X	-
chr9_10S	44137992	44137993	gene10888	.	+
chr2L	115124210	115124211	gene10889	X	-
chr1L	189274449	189274450	gene1089	X	-
chr4L	56303408	56303409	gene10890	X	-
chrUn_NW_016694811v1	2588587	2588588	gene10891	X	-
chr1L	35378725	35378726	gene10892	X	-
chr1S	97316796	97316797	gene10893	.	+
chr9_10S	2195759	2195760	gene10894	X	+
chr6L	17921849	17921850	gene10895	X	-
chr4L	76185591	76185592	gene10896	X	+
chr3L	48942065	48942066	gene10897	X	-
chr6L	29037684	29037685	gene10898	X	-
chr4S	6691402	6691403	gene10899	X	+
chr8L	118294769	118294770	gene109	X	-
chr4L	28923026	28923027	gene1090	X	+
chr4L	106958815	106958816	gene10900	X	-
chr5L	67221961	67221962	gene10901	X	+
chr5L	81173913	81173914	gene10902	X	+
chrUn_NW_016694849v1	281377	281378	gene10903	X	+
chr8L	64229510	64229511	gene10904	X	-
chr2S	73877702	73877703	gene10905	X	-
chr9_10L	36903790	36903791	gene10906	X	-
chr5L	128718952	128718953	gene10907	X	-
chr6L	119869471	119869472	gene10908	X	-
chr5S	28870698	28870699	gene10909	X	+
chr6L	124553908	124553909	gene1091	.	-
chr7L	733259	733260	gene10910	X	+
chr6L	140129609	140129610	gene10911	.	+
chr8S	75426373	75426374	gene10912	.	+
chr1L	136959094	136959095	gene10913	X	-
chr2L	137944216	137944217	gene10914	.	-
chr3L	45670888	45670889	gene10915	X	-
chrUn_NW_016694865v1	708226	708227	gene10916	X	+
chr2L	13401316	13401317	gene10917	X	-
chr3L	24944758	24944759	gene10918	X	-
chr7S	10938033	10938034	gene10919	X	+
chr7L	89746790	89746791	gene1092	.	-
chr7L	25121847	25121848	gene10920	X	+
chr1S	117978443	117978444	gene10921	X	+
chr9_10S	80118310	80118311	gene10922	X	+
chr8L	77497500	77497501	gene10923	X	-
chr1L	70135677	70135678	gene10924	X	-
chr9_10S	27095371	27095372	gene10925	X	+
chr4L	73313298	73313299	gene10926	.	+
chr7L	27248923	27248924	gene10927	.	+
chr6S	6506348	6506349	gene10928	.	+
chr8S	93567153	93567154	gene10929	X	-
chr1S	288790	288791	gene1093	X	-
chr3L	109928639	109928640	gene10930	X	-
chr7L	20109051	20109052	gene10931	X	-
chr4L	11295676	11295677	gene10932	X	+
chr2L	52850949	52850950	gene10933	X	+
chr3L	124084251	124084252	gene10934	X	-
chr5L	147602605	147602606	gene10935	X	+
chr7S	79972862	79972863	gene10936	X	+
chr8S	37224375	37224376	gene10937	X	-
chr6S	95519898	95519899	gene10938	X	-
chr2L	157440840	157440841	gene10939	X	-
chr4S	80480170	80480171	gene1094	X	+
chr2S	7776442	7776443	gene10940	X	-
chr3L	121706638	121706639	gene10941	.	-
chr1L	138565091	138565092	gene10942	.	-
chr6L	4268672	4268673	gene10943	.	-
chr4L	68238041	68238042	gene10944	X	-
chr6S	24383378	24383379	gene10945	.	+
chr2L	116747126	116747127	gene10946	X	-
chr4S	8031314	8031315	gene10947	X	+
chrUn_NW_016694834v1	1283850	1283851	gene10948	X	-
chr8L	95373911	95373912	gene10949	.	+
chr4L	103335227	103335228	gene1095	.	-
chr5S	87283904	87283905	gene10950	.	+
chr6S	33553178	33553179	gene10951	.	-
chr9_10L	66940994	66940995	gene10952	X	+
chr8L	88480530	88480531	gene10953	X	-
chrUn_NW_016694810v1	8690525	8690526	gene10954	.	-
chr8S	9562680	9562681	gene10955	X	-
chrUn_NW_016694897v1	234902	234903	gene10956	.	-
chr8S	28386346	28386347	gene10957	.	-
chr6L	48878647	48878648	gene10958	X	+
chr3S	119162144	119162145	gene10959	X	-
chr4S	81573324	81573325	gene1096	.	+
chr3L	128826419	128826420	gene10960	.	-
chrUn_NW_016694842v1	426173	426174	gene10961	X	+
chr7L	7878722	7878723	gene10962	X	-
chrUn_NW_016694813v1	2876290	2876291	gene10963	X	+
chr1L	93442206	93442207	gene10964	X	-
chr1S	137046528	137046529	gene10965	X	+
chr2S	27727110	27727111	gene10966	X	+
chr3S	4769500	4769501	gene10967	X	+
chr2L	42191314	42191315	gene10968	X	-
chr2S	8224901	8224902	gene10969	X	-
chr2S	145201082	145201083	gene1097	.	+
chr9_10L	52651354	52651355	gene10970	.	+
chr6S	116045798	116045799	gene10971	X	-
chr5L	37670303	37670304	gene10972	X	+
chr1S	43250443	43250444	gene10973	.	+
chr4L	74468776	74468777	gene10974	X	+
chr3L	133964983	133964984	gene10975	X	-
chr4L	76965565	76965566	gene10976	X	+
chr2L	50155251	50155252	gene10977	.	+
chr3L	79591853	79591854	gene10978	.	-
chr2L	138658801	138658802	gene10979	X	-
chr9_10L	6389661	6389662	gene1098	X	+
chr8S	21293929	21293930	gene10980	X	+
chr4L	7087139	7087140	gene10981	X	+
chr2L	137731922	137731923	gene10982	X	+
chr2L	137977028	137977029	gene10983	X	+
chr1L	102990374	102990375	gene10984	X	+
chr7L	248836	248837	gene10985	.	+
chr3L	68594264	68594265	gene10986	X	-
chr1L	18326542	18326543	gene10987	X	-
chr6S	305081	305082	gene10988	.	+
chr5S	69515930	69515931	gene10989	.	+
chr8L	116172146	116172147	gene1099	X	-
chr9_10L	31497337	31497338	gene10990	X	+
chrUn_NW_016694858v1	235786	235787	gene10991	.	+
chr2L	119812526	119812527	gene10992	X	-
chr3S	12830412	12830413	gene10993	X	+
chr8S	26476189	26476190	gene10994	X	-
chr9_10S	3268942	3268943	gene10995	X	-
chr4L	92072989	92072990	gene10996	X	+
chr1L	96200080	96200081	gene10997	X	-
chr3L	71794514	71794515	gene10998	X	-
chr3S	1598555	1598556	gene10999	X	+
chr6L	67235258	67235259	gene11	.	+
chr2L	123741844	123741845	gene110	.	-
chr5L	38473653	38473654	gene1100	X	+
chr4L	70422484	70422485	gene11000	X	+
chr1L	200111102	200111103	gene11001	X	+
chr5S	130249567	130249568	gene11002	X	-
chr4S	70284926	70284927	gene11003	X	-
chr5S	66252947	66252948	gene11004	.	+
chr3L	4138157	4138158	gene11005	X	+
chr5S	89214674	89214675	gene11006	X	-
chr5S	86863585	86863586	gene11007	X	-
chr9_10L	106575060	106575061	gene11008	X	-
chr5L	24467481	24467482	gene11009	X	-
chr2S	108541216	108541217	gene1101	X	-
chr1L	178897195	178897196	gene11010	X	-
chr2L	118607215	118607216	gene11011	X	-
chr8S	96021212	96021213	gene11012	X	-
chr1L	151439398	151439399	gene11013	X	+
chr9_10S	17847479	17847480	gene11014	.	+
chr2L	157511555	157511556	gene11015	X	-
chr1S	128458916	128458917	gene11016	X	+
chr5L	154650332	154650333	gene11017	.	-
chr6L	67718355	67718356	gene11018	X	-
chr2L	87480422	87480423	gene11019	X	-
chr5S	108167864	108167865	gene1102	X	-
chr4L	121310635	121310636	gene11020	.	-
chr9_10S	55902181	55902182	gene11021	X	-
chr8L	3357105	3357106	gene11022	X	-
chr4S	13151723	13151724	gene11023	X	+
chr7L	116539653	116539654	gene11024	.	-
chr4S	5698593	5698594	gene11025	X	-
chr3S	107499968	107499969	gene11026	.	+
chr6L	2737409	2737410	gene11027	X	+
chr1L	165482634	165482635	gene11028	X	+
chr3L	38736070	38736071	gene11029	X	+
chrUn_NW_016694870v1	482509	482510	gene1103	X	-
chr9_10L	18483383	18483384	gene11030	.	-
chr1L	141756914	141756915	gene11031	X	+
chr6L	94391652	94391653	gene11032	.	-
chr2S	62481791	62481792	gene11033	X	+
chr4L	97820361	97820362	gene11034	X	+
chr3S	57914587	57914588	gene11035	X	+
chr2S	24751785	24751786	gene11036	X	+
chr7S	5683985	5683986	gene11037	X	+
chr1L	118722514	118722515	gene11038	X	-
chr5L	10545988	10545989	gene11039	.	+
chr8S	78938468	78938469	gene1104	X	-
chr8S	28231933	28231934	gene11040	X	+
chr2S	133717817	133717818	gene11041	X	+
chr1L	102548085	102548086	gene11042	.	+
chr6L	36977906	36977907	gene11043	.	+
chr4S	87684375	87684376	gene11044	X	-
chr9_10L	37421177	37421178	gene11045	X	-
chr9_10L	94454420	94454421	gene11046	X	-
chr2S	56762038	56762039	gene11047	X	-
chr5L	75031620	75031621	gene11048	X	+
chr4S	64589152	64589153	gene11049	X	-
chr4L	100029346	100029347	gene1105	X	-
chr7L	7133007	7133008	gene11050	.	+
chr8S	71915240	71915241	gene11051	X	-
chr5S	82801888	82801889	gene11052	X	-
chr9_10S	35478497	35478498	gene11053	.	+
chr7L	20564770	20564771	gene11054	X	-
chr4L	21590322	21590323	gene11055	X	+
chr3S	4563171	4563172	gene11056	.	-
chr8L	118413126	118413127	gene11057	X	-
chr1S	114950548	114950549	gene11058	X	+
chr5S	113182357	113182358	gene11059	X	+
chr2S	102943514	102943515	gene1106	X	+
chr2L	57818503	57818504	gene11060	X	+
chr2S	56061324	56061325	gene11061	X	+
chr1L	165551715	165551716	gene11062	X	+
chr9_10L	52716405	52716406	gene11063	X	-
chr7S	8298097	8298098	gene11064	X	-
chr9_10S	69107558	69107559	gene11065	X	+
chr4L	112081781	112081782	gene11066	X	-
chr6L	48211603	48211604	gene11067	X	-
chrUn_NW_016694896v1	191858	191859	gene11068	.	+
chr2L	64193072	64193073	gene11069	X	-
chr3L	84088194	84088195	gene1107	X	+
chr5L	40304341	40304342	gene11070	X	-
chr2L	173276496	173276497	gene11071	X	+
chr6S	50729447	50729448	gene11072	.	+
chr1L	74503309	74503310	gene11073	X	+
chr8L	116065509	116065510	gene11074	X	-
chr8L	29055754	29055755	gene11075	.	+
chr9_10L	91104978	91104979	gene11076	X	-
chr3L	212988	212989	gene11077	X	+
chr5S	12145332	12145333	gene11078	X	+
chr7L	34423438	34423439	gene11079	X	-
chr1S	174645434	174645435	gene1108	X	+
chrUn_NW_016694858v1	62286	62287	gene11080	X	+
chrUn_NW_016695338v1	6746	6747	gene11081	.	-
chr1S	124902527	124902528	gene11082	X	-
chr1L	97815031	97815032	gene11083	.	+
chrUn_NW_016694968v1	28090	28091	gene11084	.	+
chr8L	1072953	1072954	gene11085	X	-
chr3S	97901747	97901748	gene11086	X	+
chr3L	19361478	19361479	gene11087	X	+
chr2L	339535	339536	gene11088	X	+
chr3L	10123259	10123260	gene11089	X	+
chr5L	103684267	103684268	gene1109	X	+
chr1L	142467275	142467276	gene11090	X	+
chr8S	25948004	25948005	gene11091	X	-
chr7S	54458916	54458917	gene11092	X	+
chr1L	72586198	72586199	gene11093	X	-
chr1L	166725177	166725178	gene11094	X	+
chr8L	3590733	3590734	gene11095	X	-
chr8S	80310730	80310731	gene11096	X	+
chr1L	137822386	137822387	gene11097	.	-
chr2L	157557457	157557458	gene11098	X	+
chr3L	60651580	60651581	gene11099	X	+
chr2S	158846761	158846762	gene111	X	-
chr8L	23316338	23316339	gene1110	X	-
chr3L	82042371	82042372	gene11100	X	-
chr1L	89747560	89747561	gene11101	.	+
chr7L	6179256	6179257	gene11102	X	-
chr8L	14184072	14184073	gene11103	X	+
chr2S	74579633	74579634	gene11104	.	+
chr6L	7722338	7722339	gene11105	X	-
chr1S	92516642	92516643	gene11106	.	+
chr1L	41194519	41194520	gene11107	X	+
chr4L	26304187	26304188	gene11108	X	-
chr5L	103046243	103046244	gene11109	.	+
chr6L	111982290	111982291	gene1111	X	+
chr7L	86973927	86973928	gene11110	X	+
chr7S	85131766	85131767	gene11111	X	+
chr1L	133594372	133594373	gene11112	X	+
chr6S	7385892	7385893	gene11113	X	+
chr9_10L	11503470	11503471	gene11114	X	-
chr8L	93563364	93563365	gene11115	.	+
chrUn_NW_016694827v1	1135764	1135765	gene11116	X	-
chr1L	127769331	127769332	gene11117	X	+
chrUn_NW_016694816v1	3536669	3536670	gene11118	X	+
chr5L	103500051	103500052	gene11119	.	+
chrUn_NW_016694858v1	2273	2274	gene1112	X	+
chrUn_NW_016694820v1	3308863	3308864	gene11120	X	+
chr9_10L	32149450	32149451	gene11121	.	-
chr3L	127781162	127781163	gene11122	.	-
chr4L	87042414	87042415	gene11123	X	-
chr1L	166844915	166844916	gene11124	X	+
chrUn_NW_016694820v1	1799748	1799749	gene11125	.	+
chr7S	62806452	62806453	gene11126	X	+
chr3L	31773925	31773926	gene11127	X	-
chr2S	120326299	120326300	gene11128	X	-
chrUn_NW_016694822v1	710822	710823	gene11129	.	-
chr2S	30180560	30180561	gene1113	X	+
chr3L	36587580	36587581	gene11130	.	+
chr9_10L	83348472	83348473	gene11131	X	-
chr9_10L	4946944	4946945	gene11132	X	+
chr3S	11570876	11570877	gene11133	X	-
chr7S	17525911	17525912	gene11134	X	-
chr5L	133155071	133155072	gene11135	X	-
chr4L	127496539	127496540	gene11136	X	+
chr4S	91930244	91930245	gene11137	X	-
chr8L	59266417	59266418	gene11138	.	-
chr9_10S	3049273	3049274	gene11139	X	-
chr7S	22127196	22127197	gene1114	X	+
chr5S	27234091	27234092	gene11140	.	-
chr3L	98517609	98517610	gene11141	X	-
chr1L	96150251	96150252	gene11142	X	+
chr4L	111749345	111749346	gene11143	X	+
chr1S	87163079	87163080	gene11144	X	-
chr9_10L	101042159	101042160	gene11145	X	-
chr1L	68616385	68616386	gene11146	X	-
chr3S	57329950	57329951	gene11147	.	+
chr7L	25573233	25573234	gene11148	X	-
chr2L	134456062	134456063	gene11149	X	-
chr5L	22940296	22940297	gene1115	X	-
chr4S	36862261	36862262	gene11150	X	+
chr4L	24698107	24698108	gene11151	X	-
chr8L	7055896	7055897	gene11152	X	+
chr4L	17837489	17837490	gene11153	X	+
chr4S	101036582	101036583	gene11154	X	+
chr4L	120437427	120437428	gene11155	.	+
chr9_10L	84941739	84941740	gene11156	X	-
chr9_10L	30419755	30419756	gene11157	X	-
chr5L	98867392	98867393	gene11158	X	+
chrUn_NW_016694816v1	1467184	1467185	gene11159	X	+
chr7L	74455874	74455875	gene1116	X	-
chr2L	57574773	57574774	gene11160	X	+
chr9_10L	52056800	52056801	gene11161	X	+
chr7L	11430881	11430882	gene11162	X	+
chr5S	7089395	7089396	gene11163	X	+
chr9_10S	70072628	70072629	gene11164	.	+
chr5S	8288528	8288529	gene11165	.	+
chr4L	132185329	132185330	gene11166	X	-
chr9_10L	2012622	2012623	gene11167	.	-
chr4L	34154	34155	gene11168	X	+
chr7S	87252689	87252690	gene11169	X	+
chr2L	84100413	84100414	gene1117	X	+
chr1L	37788332	37788333	gene11170	.	+
chr3L	40869756	40869757	gene11171	X	+
chr3L	37032481	37032482	gene11172	X	-
chr8L	107000750	107000751	gene11173	.	+
chr7S	54956444	54956445	gene11174	.	+
chr4L	80363152	80363153	gene11175	X	+
chr4L	70367740	70367741	gene11176	X	+
chr2L	154678965	154678966	gene11177	X	-
chr5S	23034557	23034558	gene11178	X	+
chr4L	60247492	60247493	gene11179	X	+
chr3L	81042291	81042292	gene1118	X	+
chr9_10S	93391071	93391072	gene11180	X	+
chrUn_NW_016694813v1	4528003	4528004	gene11181	.	+
chr1S	126006878	126006879	gene11182	X	+
chr2S	66345011	66345012	gene11183	X	+
chr3S	96429457	96429458	gene11184	X	-
chr5L	36004874	36004875	gene11185	X	+
chr8L	73949002	73949003	gene11186	X	-
chr2S	151033498	151033499	gene11187	X	+
chr2L	56696555	56696556	gene11188	X	-
chr3L	46749596	46749597	gene11189	.	-
chr9_10L	32479671	32479672	gene1119	X	+
chr3S	65913406	65913407	gene11190	X	-
chr3L	108722830	108722831	gene11191	X	+
chr1L	152831010	152831011	gene11192	X	-
chr8L	64271935	64271936	gene11193	X	-
chr2L	179124334	179124335	gene11194	.	-
chr4S	3381281	3381282	gene11195	X	-
chr1L	189786354	189786355	gene11196	X	-
chr8S	56711352	56711353	gene11197	.	+
chr1S	11426999	11427000	gene11198	X	-
chr5S	124725796	124725797	gene11199	.	+
chr3S	628416	628417	gene112	X	-
chr7L	4891551	4891552	gene1120	X	-
chr1S	12920588	12920589	gene11200	X	+
chr4L	96894000	96894001	gene11201	X	+
chr9_10S	16966890	16966891	gene11202	X	-
chr1S	83856486	83856487	gene11203	X	+
chr5L	89041681	89041682	gene11204	X	-
chr1S	103077605	103077606	gene11205	X	+
chr1L	135800888	135800889	gene11206	X	-
chr7S	51645783	51645784	gene11207	X	+
chr5L	115488708	115488709	gene11208	.	+
chr3S	34740585	34740586	gene11209	X	+
chr4L	93787722	93787723	gene1121	X	+
chr1S	114983911	114983912	gene11210	X	-
chr2S	159223928	159223929	gene11211	X	+
chr7L	86061361	86061362	gene11212	X	-
chr4S	89858761	89858762	gene11213	.	+
chrUn_NW_016694812v1	4608958	4608959	gene11214	.	-
chr9_10S	54037704	54037705	gene11215	X	-
chr1L	139917767	139917768	gene11216	.	-
chr2L	58263682	58263683	gene11217	X	+
chr4S	2763053	2763054	gene11218	X	-
chr4L	41960042	41960043	gene11219	X	+
chr1L	137409544	137409545	gene1122	X	-
chr2L	125743531	125743532	gene11220	.	-
chr9_10L	43332894	43332895	gene11221	.	-
chr8L	1735395	1735396	gene11222	X	+
chr1L	50501570	50501571	gene11223	X	-
chr8L	33587224	33587225	gene11224	X	-
chr4L	121900708	121900709	gene11225	X	+
chr1L	79248086	79248087	gene11226	X	+
chr2L	135230750	135230751	gene11227	.	-
chr8S	94138955	94138956	gene11228	.	-
chr5S	87300672	87300673	gene11229	X	+
chr2L	139038646	139038647	gene1123	X	+
chr9_10L	18479797	18479798	gene11230	X	-
chr1S	5514821	5514822	gene11231	X	-
chr8S	12923145	12923146	gene11232	X	+
chr3S	86527785	86527786	gene11233	.	+
chr8S	83469578	83469579	gene11234	X	+
chr2L	139849645	139849646	gene11235	X	-
chr1S	105757138	105757139	gene11236	X	-
chr9_10S	7565344	7565345	gene11237	X	-
chr2L	85768694	85768695	gene11238	X	-
chr1S	163865967	163865968	gene11239	X	+
chr6L	130340984	130340985	gene1124	X	+
chr1L	89120317	89120318	gene11240	.	+
chr5S	70438060	70438061	gene11241	X	-
chr3S	108787966	108787967	gene11242	.	+
chr2L	29259999	29260000	gene11243	X	-
chr7S	72099293	72099294	gene11244	.	+
chr1L	140586316	140586317	gene11245	.	-
chr8S	92596214	92596215	gene11246	X	+
chr3S	35304532	35304533	gene11247	X	-
chr3L	52740715	52740716	gene11248	.	-
chr9_10S	83553631	83553632	gene11249	X	+
chr9_10L	45919252	45919253	gene1125	X	+
chr6S	4982643	4982644	gene11250	X	+
chr3L	49142241	49142242	gene11251	X	-
chr9_10L	41671489	41671490	gene11252	X	-
chr2S	54675563	54675564	gene11253	X	+
chr2L	162494990	162494991	gene11254	.	+
chr7L	78428270	78428271	gene11255	.	-
chr4S	3148470	3148471	gene11256	X	+
chr9_10S	3112542	3112543	gene11257	.	-
chr3L	49554100	49554101	gene11258	X	+
chr6S	104909109	104909110	gene11259	X	+
chr4S	88355893	88355894	gene1126	X	+
chr5L	154985861	154985862	gene11260	.	-
chr6S	86521759	86521760	gene11261	X	+
chr1S	91551397	91551398	gene11262	X	-
chr9_10L	128280	128281	gene11263	X	-
chr5L	90016342	90016343	gene11264	X	+
chr8L	57243762	57243763	gene11265	X	-
chr4L	224149	224150	gene11266	.	+
chr9_10S	33193665	33193666	gene11267	.	+
chr2L	84429403	84429404	gene11268	X	+
chr3L	55333026	55333027	gene11269	X	-
chr1L	112356160	112356161	gene1127	X	+
chr5L	40353294	40353295	gene11270	X	+
chr4L	141311273	141311274	gene11271	X	-
chr5S	73720627	73720628	gene11272	X	-
chr4L	87482795	87482796	gene11273	X	-
chr2S	66584319	66584320	gene11274	X	+
chr1L	110979224	110979225	gene11275	X	-
chr3S	81348449	81348450	gene11276	.	+
chr1S	123527498	123527499	gene11277	X	-
chr8S	66059505	66059506	gene11278	.	+
chr5L	17627603	17627604	gene11279	X	-
chr4L	8898107	8898108	gene1128	X	+
chr8S	76833181	76833182	gene11280	X	+
chr4L	28904613	28904614	gene11281	X	-
chr6L	119806091	119806092	gene11282	X	+
chr5S	33323482	33323483	gene11283	X	+
chr6S	84541985	84541986	gene11284	X	+
chr4L	105372679	105372680	gene11285	X	-
chr4S	12895389	12895390	gene11286	.	-
chr3S	35550870	35550871	gene11287	X	+
chr5L	86688720	86688721	gene11288	X	-
chr5L	17302124	17302125	gene11289	X	+
chr9_10S	16704965	16704966	gene1129	X	-
chr7S	11519915	11519916	gene11290	X	-
chr3S	75772855	75772856	gene11291	X	-
chr8L	109542139	109542140	gene11292	X	-
chr1L	179537432	179537433	gene11293	.	-
chr7L	85881813	85881814	gene11294	X	-
chr9_10S	103125751	103125752	gene11295	X	-
chr3L	7611138	7611139	gene11296	X	-
chr8S	85990475	85990476	gene11297	X	-
chrUn_NW_016694820v1	2946321	2946322	gene11298	X	-
chr2L	133230856	133230857	gene11299	X	+
chr4S	497725	497726	gene113	X	-
chr9_10S	29531307	29531308	gene1130	X	-
chr4L	35498548	35498549	gene11300	X	-
chr9_10L	40347117	40347118	gene11301	.	+
chr6L	131972850	131972851	gene11302	X	-
chr9_10L	27175155	27175156	gene11303	X	+
chr4S	95185269	95185270	gene11304	X	+
chr8L	53495993	53495994	gene11305	X	-
chr2S	946064	946065	gene11306	X	-
chr9_10S	19824138	19824139	gene11307	X	+
chr4S	75377810	75377811	gene11308	X	+
chr2S	37241748	37241749	gene11309	X	-
chr1L	117842163	117842164	gene1131	.	+
chr4L	17158061	17158062	gene11310	.	+
chr1S	3036628	3036629	gene11311	.	-
chr3L	43411735	43411736	gene11312	.	+
chr4S	52141107	52141108	gene11313	X	+
chr2S	120869741	120869742	gene11314	X	+
chr3L	138818409	138818410	gene11315	X	+
chr2S	58899700	58899701	gene11316	X	-
chr8S	90821045	90821046	gene11317	.	-
chr1L	20614167	20614168	gene11318	X	+
chrUn_NW_016694813v1	2241023	2241024	gene11319	X	-
chr5S	63733720	63733721	gene1132	.	-
chr4S	94950417	94950418	gene11320	X	+
chr2S	65187906	65187907	gene11321	.	-
chr8L	2435509	2435510	gene11322	X	-
chrUn_NW_016710227v1	759	760	gene11323	.	-
chr1S	145078092	145078093	gene11324	X	-
chr8S	29393309	29393310	gene11325	X	-
chr9_10L	73315302	73315303	gene11326	X	+
chr8S	32500816	32500817	gene11327	X	+
chr3S	26157063	26157064	gene11328	X	+
chr6S	126974000	126974001	gene11329	.	-
chr2L	174703834	174703835	gene1133	.	+
chr4L	117097903	117097904	gene11330	X	-
chr2L	132423587	132423588	gene11331	.	+
chr2S	92811832	92811833	gene11332	.	-
chr5L	15703360	15703361	gene11333	X	-
chr2S	75175692	75175693	gene11334	X	+
chr3L	49320164	49320165	gene11335	X	-
chr2S	159279010	159279011	gene11336	X	+
chr8S	12359291	12359292	gene11337	X	+
chr3L	108317110	108317111	gene11338	X	-
chr6L	121810836	121810837	gene11339	.	+
chr8S	95830074	95830075	gene1134	X	-
chr5L	137828678	137828679	gene11340	X	+
chr4S	15192231	15192232	gene11341	X	-
chr2S	118040399	118040400	gene11342	X	-
chr2S	9600319	9600320	gene11343	X	+
chr6S	115719550	115719551	gene11344	X	-
chr4S	74448701	74448702	gene11345	X	+
chr1L	152561092	152561093	gene11346	X	+
chr5L	90645212	90645213	gene11347	X	+
chr3L	65827153	65827154	gene11348	X	+
chr9_10L	78654468	78654469	gene11349	.	+
chr1S	128373687	128373688	gene1135	X	-
chr2S	137245443	137245444	gene11350	X	+
chr1L	206472947	206472948	gene11351	X	+
chr5L	22981768	22981769	gene11352	X	-
chr3S	36203362	36203363	gene11353	X	-
chr2L	87011528	87011529	gene11354	X	+
chr3L	3937139	3937140	gene11355	X	+
chr9_10S	3896563	3896564	gene11356	X	+
chr4S	57931623	57931624	gene11357	.	+
chr8L	110208904	110208905	gene11358	.	-
chr4L	4682026	4682027	gene11359	X	+
chr6L	100705138	100705139	gene1136	X	+
chr2L	110314011	110314012	gene11360	X	+
chr8L	65072888	65072889	gene11361	X	+
chr3S	38397828	38397829	gene11362	X	-
chr3S	57042135	57042136	gene11363	X	+
chr2S	16572233	16572234	gene11364	.	-
chr6L	41315121	41315122	gene11365	X	-
chrUn_NW_016694826v1	1963837	1963838	gene11366	X	-
chr1S	170872132	170872133	gene11367	X	-
chr9_10L	68888670	68888671	gene11368	.	-
chr1S	118193284	118193285	gene11369	.	-
chr2L	137418138	137418139	gene1137	X	-
chr2S	79360181	79360182	gene11370	X	-
chr2L	963804	963805	gene11371	X	-
chr9_10L	101128218	101128219	gene11372	X	+
chr2L	92010133	92010134	gene11373	X	+
chr4L	99222080	99222081	gene11374	X	+
chrUn_NW_016694810v1	8303329	8303330	gene11375	X	-
chr7L	73029938	73029939	gene11376	X	+
chrUn_NW_016694811v1	934717	934718	gene11377	X	+
chr9_10L	112845390	112845391	gene11378	.	-
chr2S	92095955	92095956	gene11379	.	+
chr4S	42503165	42503166	gene1138	X	-
chr1L	104896181	104896182	gene11380	X	-
chr2L	103479128	103479129	gene11381	X	-
chr7L	109055158	109055159	gene11382	X	+
chr1L	14409990	14409991	gene11383	X	-
chr8L	44176253	44176254	gene11384	X	-
chr8L	23644591	23644592	gene11385	X	-
chr6L	65698435	65698436	gene11386	X	-
chr2L	54423718	54423719	gene11387	X	+
chr2S	143056998	143056999	gene11388	X	-
chr5L	16132224	16132225	gene11389	X	-
chr4L	14943967	14943968	gene1139	X	-
chr8L	65227013	65227014	gene11390	X	-
chr9_10S	31873221	31873222	gene11391	X	-
chr1S	29870466	29870467	gene11392	X	-
chr8S	57279201	57279202	gene11393	X	-
chr3S	45623254	45623255	gene11394	.	-
chr5L	80457855	80457856	gene11395	X	-
chr5L	124438760	124438761	gene11396	.	-
chr2L	84186856	84186857	gene11397	X	-
chr3S	35816778	35816779	gene11398	X	+
chrUn_NW_016694815v1	3719840	3719841	gene11399	X	-
chr4S	88596744	88596745	gene114	X	-
chr7L	20727953	20727954	gene1140	X	-
chr9_10L	114618540	114618541	gene11400	X	-
chr9_10S	101898587	101898588	gene11401	.	+
chr1S	49187739	49187740	gene11402	.	+
chrUn_NW_016694850v1	179708	179709	gene11403	X	-
chr2S	107188755	107188756	gene11404	X	-
chr6L	83935927	83935928	gene11405	X	+
chr9_10L	46517342	46517343	gene11406	X	-
chr9_10S	89904661	89904662	gene11407	.	+
chr3L	100505053	100505054	gene11408	X	-
chr8L	47454887	47454888	gene11409	X	-
chr1L	49309292	49309293	gene1141	X	-
chr2L	79110489	79110490	gene11410	X	-
chr2S	107974916	107974917	gene11411	X	-
chr4L	31103619	31103620	gene11412	X	-
chr4L	30506480	30506481	gene11413	X	+
chr3S	1447586	1447587	gene11414	.	+
chr6L	86451416	86451417	gene11415	X	-
chr2L	139000847	139000848	gene11416	X	-
chr6L	129938954	129938955	gene11417	X	-
chr1L	129159418	129159419	gene11418	.	+
chr3L	29501252	29501253	gene11419	X	+
chr2S	28746868	28746869	gene1142	X	+
chr9_10S	765311	765312	gene11420	X	+
chr4S	15302662	15302663	gene11421	X	+
chr6L	102911625	102911626	gene11422	X	-
chr9_10L	50225057	50225058	gene11423	X	-
chrUn_NW_016694936v1	67754	67755	gene11424	X	-
chr2L	138260366	138260367	gene11425	X	-
chr8L	113640922	113640923	gene11426	X	+
chr8L	15570921	15570922	gene11427	.	-
chr5L	159153473	159153474	gene11428	.	-
chr3L	58254261	58254262	gene11429	.	-
chr3S	21824650	21824651	gene1143	X	-
chr3S	96393671	96393672	gene11430	.	-
chrUn_NW_016694815v1	4509391	4509392	gene11431	X	+
chr6L	39629853	39629854	gene11432	.	-
chr3S	72315158	72315159	gene11433	X	+
chr7L	88508592	88508593	gene11434	X	+
chr1S	117407143	117407144	gene11435	X	+
chrUn_NW_016694863v1	644871	644872	gene11436	X	+
chr9_10S	86006141	86006142	gene11437	.	-
chr7S	53530931	53530932	gene11438	X	+
chr6L	111802496	111802497	gene11439	X	+
chr2L	123333344	123333345	gene1144	X	-
chr4S	99388145	99388146	gene11440	.	+
chr2L	172255871	172255872	gene11441	X	+
chr6L	36734284	36734285	gene11442	.	+
chr2L	91536333	91536334	gene11443	.	-
chr4S	45139865	45139866	gene11444	.	-
chr6S	108587689	108587690	gene11445	X	-
chr5L	48573461	48573462	gene11446	.	-
chr7L	95516013	95516014	gene11447	X	+
chr4S	11502078	11502079	gene11448	.	-
chr2S	101766693	101766694	gene11449	.	+
chr8L	53385033	53385034	gene1145	X	-
chr6L	70656217	70656218	gene11450	X	-
chr5L	31530040	31530041	gene11451	X	+
chr2L	5961161	5961162	gene11452	X	+
chr2L	41531594	41531595	gene11453	.	+
chr6L	12354683	12354684	gene11454	.	+
chr8L	38544625	38544626	gene11455	X	+
chr9_10S	45668418	45668419	gene11456	X	-
chr7S	84498484	84498485	gene11457	X	-
chr7L	101976374	101976375	gene11458	X	-
chr5L	102142012	102142013	gene11459	X	-
chr6L	33983811	33983812	gene1146	X	-
chr8L	59608864	59608865	gene11460	X	+
chr6S	78372590	78372591	gene11461	X	-
chr6L	129212773	129212774	gene11462	X	-
chr2L	140042626	140042627	gene11463	X	-
chr4L	116885892	116885893	gene11464	X	-
chr4L	73208567	73208568	gene11465	X	-
chr2L	13459177	13459178	gene11466	X	-
chr3L	15393540	15393541	gene11467	X	+
chr9_10L	40563200	40563201	gene11468	X	-
chr5S	7180660	7180661	gene11469	X	+
chr9_10L	50045391	50045392	gene1147	X	-
chr8S	72811586	72811587	gene11470	X	+
chr9_10L	14955091	14955092	gene11471	X	+
chr5S	132340021	132340022	gene11472	X	+
chr6S	2117050	2117051	gene11473	X	-
chr9_10S	2293552	2293553	gene11474	X	-
chrUn_NW_016694811v1	2063633	2063634	gene11475	X	-
chr4S	49671137	49671138	gene11476	.	-
chr1L	187718173	187718174	gene11477	X	-
chr1S	128604593	128604594	gene11478	X	-
chr2S	15734485	15734486	gene11479	.	+
chr6S	92525473	92525474	gene1148	X	+
chr4L	53131149	53131150	gene11480	X	+
chr1L	170972188	170972189	gene11481	.	-
chr2S	71955656	71955657	gene11482	.	-
chr9_10L	70950273	70950274	gene11483	X	+
chr8S	47220036	47220037	gene11484	.	+
chr2S	7078237	7078238	gene11485	X	+
chr2L	48162325	48162326	gene11486	X	+
chr4S	49630759	49630760	gene11487	X	-
chr9_10L	7728618	7728619	gene11488	X	-
chr9_10L	6218171	6218172	gene11489	X	-
chr2L	103464143	103464144	gene1149	X	-
chr1L	207075081	207075082	gene11490	X	+
chr8S	81783757	81783758	gene11491	X	-
chr3S	69500171	69500172	gene11492	.	+
chr8L	59828324	59828325	gene11493	X	+
chr1L	140660748	140660749	gene11494	.	-
chr6S	42623649	42623650	gene11495	X	-
chr5S	107910387	107910388	gene11496	.	+
chr9_10S	3932368	3932369	gene11497	X	-
chr5L	123352925	123352926	gene11498	X	-
chr1L	18735454	18735455	gene11499	X	+
chr3S	45637718	45637719	gene115	.	+
chr2S	46081252	46081253	gene1150	X	-
chr4S	23217096	23217097	gene11500	.	+
chr3L	1917256	1917257	gene11501	.	-
chrUn_NW_016694813v1	2862946	2862947	gene11502	X	-
chr1S	290467	290468	gene11503	X	+
chr5S	112845912	112845913	gene11504	X	-
chr1L	38052430	38052431	gene11505	X	+
chr7L	125334655	125334656	gene11506	.	+
chr5L	16503000	16503001	gene11507	X	+
chr4L	120755471	120755472	gene11508	X	-
chr2S	88207531	88207532	gene11509	X	+
chr3S	68415732	68415733	gene1151	X	+
chrUn_NW_016694813v1	3446350	3446351	gene11510	X	+
chr8L	63519120	63519121	gene11511	.	-
chrUn_NW_016694813v1	2954373	2954374	gene11512	X	-
chr9_10L	97239249	97239250	gene11513	X	+
chr9_10S	26334406	26334407	gene11514	X	+
chr9_10S	1861958	1861959	gene11515	.	-
chr6S	50533636	50533637	gene11516	.	-
chrUn_NW_016694831v1	1297417	1297418	gene11517	X	-
chr5L	15792397	15792398	gene11518	X	+
chr7L	67449684	67449685	gene11519	X	+
chr3S	12379615	12379616	gene1152	X	-
chr8S	3158362	3158363	gene11520	X	+
chr3L	58358275	58358276	gene11521	.	-
chr2S	60204066	60204067	gene11522	X	-
chrUn_NW_016694838v1	105149	105150	gene11523	X	+
chr5S	36173492	36173493	gene11524	X	+
chr4S	104434814	104434815	gene11525	X	-
chr2L	114587436	114587437	gene11526	X	-
chr9_10L	77363316	77363317	gene11527	X	-
chr1L	155000272	155000273	gene11528	X	+
chr2S	131875532	131875533	gene11529	X	+
chr6S	81312944	81312945	gene1153	X	+
chr5S	78454658	78454659	gene11530	X	+
chr3L	144073895	144073896	gene11531	X	+
chr5L	134765323	134765324	gene11532	X	+
chr9_10S	89255943	89255944	gene11533	X	+
chr8S	31578804	31578805	gene11534	X	-
chr5S	43993411	43993412	gene11535	X	-
chrUn_NW_016694819v1	1688752	1688753	gene11536	X	-
chr4S	65124137	65124138	gene11537	X	+
chr2S	39218890	39218891	gene11538	X	-
chr6L	127024970	127024971	gene11539	X	-
chr6S	2869874	2869875	gene1154	X	-
chr8L	3427880	3427881	gene11540	X	-
chrUn_NW_016694863v1	313360	313361	gene11541	.	+
chr4L	24275904	24275905	gene11542	X	-
chr5L	84550830	84550831	gene11543	X	-
chr6S	98381874	98381875	gene11544	X	-
chr1S	144048241	144048242	gene11545	X	-
chr2L	134914187	134914188	gene11546	X	+
chr3S	24732048	24732049	gene11547	.	+
chr2S	118132427	118132428	gene11548	X	-
chr2L	123927317	123927318	gene11549	.	+
chrUn_NW_016694833v1	979285	979286	gene1155	X	-
chr1L	125427219	125427220	gene11550	X	-
chr6L	124583306	124583307	gene11551	X	+
chr5S	6072015	6072016	gene11552	X	-
chr2S	59346848	59346849	gene11553	X	+
chr7S	30115585	30115586	gene11554	X	-
chr9_10L	36648608	36648609	gene11555	X	+
chr1S	149388773	149388774	gene11556	X	-
chr9_10S	75193318	75193319	gene11557	.	+
chr2S	6085900	6085901	gene11558	X	+
chr6S	106830926	106830927	gene11559	.	-
chr1S	174909082	174909083	gene1156	X	-
chr2L	156057131	156057132	gene11560	.	+
chr6L	50965917	50965918	gene11561	.	-
chr7L	46659676	46659677	gene11562	.	+
chr1L	128759712	128759713	gene11563	X	-
chr5S	41764802	41764803	gene11564	X	-
chr8S	28396096	28396097	gene11565	.	+
chr9_10L	33666829	33666830	gene11566	X	+
chr8S	73022704	73022705	gene11567	X	+
chr4S	49417549	49417550	gene11568	X	+
chr2L	635252	635253	gene11569	X	-
chr3L	42725408	42725409	gene1157	X	-
chr3L	8588431	8588432	gene11570	X	-
chr7L	87839245	87839246	gene11571	X	+
chr3L	97990938	97990939	gene11572	X	-
chr5S	1044914	1044915	gene11573	X	-
chr9_10L	20773750	20773751	gene11574	X	-
chr1L	7505831	7505832	gene11575	X	+
chr1L	6672786	6672787	gene11576	.	-
chr4S	90562387	90562388	gene11577	.	-
chr3L	3094339	3094340	gene11578	X	-
chr4L	72847057	72847058	gene11579	X	+
chr5S	10188264	10188265	gene1158	.	+
chrUn_NW_016694830v1	979702	979703	gene11580	X	+
chr3L	120337291	120337292	gene11581	.	+
chrUn_NW_016694811v1	1310217	1310218	gene11582	X	-
chr8L	53189868	53189869	gene11583	.	-
chr2S	57884750	57884751	gene11584	X	+
chr3L	24522338	24522339	gene11585	X	-
chr3L	98414166	98414167	gene11586	X	+
chr7L	123588783	123588784	gene11587	X	+
chr2L	136939440	136939441	gene11588	X	+
chr2S	114837880	114837881	gene11589	X	-
chr4L	16576361	16576362	gene1159	X	-
chr6L	2928929	2928930	gene11590	X	+
chr7L	24181626	24181627	gene11591	X	+
chr7L	45663922	45663923	gene11592	.	+
chr5L	41233511	41233512	gene11593	X	-
chr3L	142485799	142485800	gene11594	X	-
chr9_10L	1966785	1966786	gene11595	X	+
chr8L	16160556	16160557	gene11596	X	-
chr7L	28454034	28454035	gene11597	.	+
chr5S	128916961	128916962	gene11598	.	-
chr4S	70360720	70360721	gene11599	X	+
chr7S	15522665	15522666	gene116	X	-
chr8S	44266374	44266375	gene1160	.	-
chr9_10S	41158879	41158880	gene11600	X	+
chr5S	95183471	95183472	gene11601	X	-
chr9_10S	8452120	8452121	gene11602	X	+
chr4L	89628963	89628964	gene11603	.	-
chr1L	139403706	139403707	gene11604	X	-
chr3L	86708561	86708562	gene11605	X	-
chr8S	25675933	25675934	gene11606	X	-
chr3S	29738464	29738465	gene11607	.	+
chr3L	106950113	106950114	gene11608	X	-
chr7L	107069674	107069675	gene11609	.	-
chr1S	134400795	134400796	gene1161	X	-
chr3S	61406235	61406236	gene11610	X	+
chr3L	918993	918994	gene11611	X	+
chr1L	89833183	89833184	gene11612	X	-
chr9_10S	100722004	100722005	gene11613	.	-
chr5L	68974647	68974648	gene11614	X	-
chr4L	115447888	115447889	gene11615	X	-
chr8L	1490828	1490829	gene11616	X	-
chr4L	86448153	86448154	gene11617	X	-
chr6L	57664258	57664259	gene11618	X	+
chr5S	87041055	87041056	gene11619	X	-
chr8S	5720700	5720701	gene1162	.	+
chr8L	116728528	116728529	gene11620	.	+
chr1L	125865130	125865131	gene11621	X	+
chr5L	100537927	100537928	gene11622	X	+
chr1L	108522711	108522712	gene11623	X	-
chr9_10L	46962529	46962530	gene11624	X	-
chr4S	110271242	110271243	gene11625	X	-
chr2S	7147253	7147254	gene11626	X	+
chr9_10L	104729846	104729847	gene11627	X	+
chr5S	85618873	85618874	gene11628	X	-
chr5L	7255992	7255993	gene11629	X	-
chr4L	112771641	112771642	gene1163	X	+
chr3L	66778520	66778521	gene11630	X	+
chr2S	116235317	116235318	gene11631	X	-
chr5L	6359785	6359786	gene11632	X	+
chr4S	96061958	96061959	gene11633	.	+
chr2L	2048888	2048889	gene11634	X	-
chr3L	133044869	133044870	gene11635	X	-
chr5S	47417074	47417075	gene11636	X	-
chr1S	90240456	90240457	gene11637	.	+
chr7L	114829306	114829307	gene11638	X	-
chr3L	798163	798164	gene11639	.	+
chr4L	7058423	7058424	gene1164	X	-
chr9_10L	41598540	41598541	gene11640	X	+
chr4L	11051563	11051564	gene11641	X	+
chr8S	96125263	96125264	gene11642	.	-
chr8S	27155441	27155442	gene11643	.	+
chr2L	155067093	155067094	gene11644	X	+
chr2L	173756138	173756139	gene11645	X	-
chr2S	97715373	97715374	gene11646	.	-
chr1L	101718611	101718612	gene11647	X	-
chr8L	78093454	78093455	gene11648	X	+
chr9_10L	113286894	113286895	gene11649	.	-
chr3S	25049245	25049246	gene1165	X	-
chr4S	43161018	43161019	gene11650	X	-
chr2L	147260245	147260246	gene11651	X	+
chrUn_NW_016694813v1	3305952	3305953	gene11652	.	+
chr8S	74815768	74815769	gene11653	X	+
chr1L	73589718	73589719	gene11654	X	-
chr1L	127061611	127061612	gene11655	X	-
chr3S	67557328	67557329	gene11656	X	-
chr7L	99676875	99676876	gene11657	X	-
chr2L	158779521	158779522	gene11658	.	-
chr2L	86092131	86092132	gene11659	X	-
chr1S	127706140	127706141	gene1166	X	+
chr1L	217632788	217632789	gene11660	.	-
chr9_10S	53109201	53109202	gene11661	X	+
chr1L	60555128	60555129	gene11662	X	+
chrUn_NW_016694821v1	182667	182668	gene11663	X	-
chr5L	1211635	1211636	gene11664	X	+
chrUn_NW_016694811v1	7042903	7042904	gene11665	X	+
chrUn_NW_016694811v1	5463482	5463483	gene11666	.	-
chr8L	46880248	46880249	gene11667	X	-
chr9_10S	2676617	2676618	gene11668	X	+
chr5L	99925364	99925365	gene11669	X	+
chr8S	29706483	29706484	gene1167	.	-
chr9_10L	29209290	29209291	gene11670	.	+
chr8S	7462063	7462064	gene11671	X	+
chr8S	19664198	19664199	gene11672	X	+
chr1S	61764494	61764495	gene11673	X	+
chr3L	9510104	9510105	gene11674	X	+
chr2L	58998242	58998243	gene11675	.	-
chr2S	97655525	97655526	gene11676	X	+
chr8S	83851833	83851834	gene11677	X	-
chr2L	33186013	33186014	gene11678	X	-
chr5S	33939048	33939049	gene11679	.	-
chr8S	87343187	87343188	gene1168	X	-
chr9_10L	105406409	105406410	gene11680	.	-
chr1L	126815260	126815261	gene11681	.	-
chr2L	78316654	78316655	gene11682	X	-
chr8S	9497589	9497590	gene11683	.	+
chr8L	82987875	82987876	gene11684	.	-
chr3S	4574452	4574453	gene11685	X	+
chr3L	121642409	121642410	gene11686	X	+
chr1S	88304458	88304459	gene11687	X	+
chr6L	47809425	47809426	gene11688	X	+
chr8L	2786567	2786568	gene11689	X	+
chr2L	43178902	43178903	gene1169	X	+
chr6L	63145640	63145641	gene11690	X	-
chr8S	76944482	76944483	gene11691	X	+
chrUn_NW_016695001v1	19332	19333	gene11692	.	+
chr3S	4444774	4444775	gene11693	X	-
chr5L	84806005	84806006	gene11694	X	-
chr4S	15486065	15486066	gene11695	X	+
chr2S	130546634	130546635	gene11696	.	+
chr6L	886846	886847	gene11697	X	+
chr2L	10624470	10624471	gene11698	.	-
chr5L	11277056	11277057	gene11699	X	+
chr8S	84932060	84932061	gene117	X	-
chr2L	89109602	89109603	gene1170	X	+
chr9_10S	59273505	59273506	gene11700	X	+
chr9_10S	41965386	41965387	gene11701	X	+
chr5S	116017939	116017940	gene11702	X	-
chr2L	80976802	80976803	gene11703	X	+
chr8S	35634283	35634284	gene11704	X	-
chr4S	9162249	9162250	gene11705	.	+
chr4L	1820400	1820401	gene11706	X	-
chr4L	80797511	80797512	gene11707	X	-
chr1S	99099360	99099361	gene11708	X	-
chr9_10L	29029984	29029985	gene11709	.	+
chr5L	1449605	1449606	gene1171	X	+
chr2S	141736205	141736206	gene11710	X	+
chr2S	5513362	5513363	gene11711	.	-
chr1L	121834035	121834036	gene11712	.	-
chr1L	132468700	132468701	gene11713	X	-
chr9_10S	28980696	28980697	gene11714	.	+
chr5L	38634332	38634333	gene11715	X	-
chr4L	106516497	106516498	gene11716	X	-
chr9_10L	47332049	47332050	gene11717	X	-
chr4S	7887848	7887849	gene11718	X	+
chr7L	88803282	88803283	gene11719	X	+
chr6L	2451301	2451302	gene1172	.	+
chr4S	40321584	40321585	gene11720	X	-
chr7L	101821097	101821098	gene11721	X	-
chr1S	160658599	160658600	gene11722	.	+
chr5L	45536415	45536416	gene11723	X	+
chr2S	21052355	21052356	gene11724	X	+
chr3L	49498320	49498321	gene11725	.	-
chr6L	4879609	4879610	gene11726	X	+
chr4S	94657957	94657958	gene11727	X	+
chr6L	32021300	32021301	gene11728	X	+
chr2S	70750711	70750712	gene11729	X	-
chr2L	56858315	56858316	gene1173	X	-
chr5S	66137350	66137351	gene11730	.	-
chr9_10L	107554111	107554112	gene11731	.	-
chr9_10L	17229348	17229349	gene11732	X	+
chr5S	39771777	39771778	gene11733	.	-
chr2L	54254544	54254545	gene11734	.	-
chr8S	34439194	34439195	gene11735	X	+
chr9_10L	100371546	100371547	gene11736	X	-
chr1L	116778794	116778795	gene11737	X	-
chr2S	143016951	143016952	gene11738	X	+
chr9_10L	112921905	112921906	gene11739	X	-
chr3S	89582925	89582926	gene1174	X	+
chr9_10L	65743926	65743927	gene11740	X	+
chr3S	91367437	91367438	gene11741	.	+
chr8L	106657067	106657068	gene11742	.	+
chr3S	87062161	87062162	gene11743	X	-
chr8L	82743933	82743934	gene11744	X	+
chr9_10L	75634664	75634665	gene11745	X	-
chr4S	15384653	15384654	gene11746	.	+
chr8L	64699759	64699760	gene11747	.	-
chr4L	28530455	28530456	gene11748	X	-
chr5S	34393358	34393359	gene11749	X	-
chrUn_NW_016694823v1	1776817	1776818	gene1175	X	-
chr8S	19026919	19026920	gene11750	X	-
chr9_10L	83160156	83160157	gene11751	X	+
chr1S	71633371	71633372	gene11752	.	-
chr8S	27336599	27336600	gene11753	X	-
chr1L	101762625	101762626	gene11754	.	-
chr4L	113599500	113599501	gene11755	X	+
chr2S	133717884	133717885	gene11756	X	-
chr6S	105162708	105162709	gene11757	X	+
chr4S	101344375	101344376	gene11758	X	+
chr2L	151883145	151883146	gene11759	X	-
chr4S	99214287	99214288	gene1176	X	+
chr7L	39660320	39660321	gene11760	X	+
chr4S	49062609	49062610	gene11761	X	+
chrUn_NW_016694822v1	1713855	1713856	gene11762	X	-
chr8S	98063056	98063057	gene11763	X	+
chr4S	5959703	5959704	gene11764	X	-
chr5L	115265609	115265610	gene11765	.	+
chr4L	61176136	61176137	gene11766	.	+
chr5L	16649811	16649812	gene11767	X	-
chr1L	73518327	73518328	gene11768	X	+
chr7L	31069905	31069906	gene11769	.	+
chr8S	31266527	31266528	gene1177	X	-
chr4L	16780713	16780714	gene11770	.	-
chr1L	27913950	27913951	gene11771	.	-
chr7S	64756419	64756420	gene11772	X	+
chr2S	66565422	66565423	gene11773	X	+
chr8S	27439877	27439878	gene11774	X	-
chr8S	2143499	2143500	gene11775	.	+
chr9_10L	105141677	105141678	gene11776	X	-
chr5L	36393650	36393651	gene11777	X	-
chr3L	119239125	119239126	gene11778	X	-
chr9_10S	13429938	13429939	gene11779	X	-
chr8S	71044393	71044394	gene1178	X	+
chr1S	115448932	115448933	gene11780	X	+
chrUn_NW_016694833v1	992641	992642	gene11781	X	+
chr7L	107294413	107294414	gene11782	X	-
chr3S	7714152	7714153	gene11783	X	+
chr3L	106693416	106693417	gene11784	X	+
chr3S	97026825	97026826	gene11785	.	+
chr9_10S	100015318	100015319	gene11786	X	+
chr2L	135488534	135488535	gene11787	X	+
chr2L	84252801	84252802	gene11788	X	-
chr8L	36986998	36986999	gene11789	X	+
chr6L	57665076	57665077	gene1179	X	-
chr3L	29134229	29134230	gene11790	.	-
chr5S	36290927	36290928	gene11791	X	+
chr1S	165427376	165427377	gene11792	.	+
chr4S	77432219	77432220	gene11793	X	-
chr8S	91793598	91793599	gene11794	X	+
chrUn_NW_016694858v1	55913	55914	gene11795	X	-
chr1S	119968366	119968367	gene11796	X	+
chr1L	187274996	187274997	gene11797	X	-
[truncated: 48,777 more rows]

## Sheet: B. All TSSs v10.1
Chr	Start	End	Geneid	RNA-seq_support	Strand
Chr1L	46900	46951	XBXL10_1g1	.	+
Chr1L	373991	374042	XBXL10_1g10	X	+
Chr1L	3467992	3468043	XBXL10_1g100	X	+
Chr2S	71256565	71256616	XBXL10_1g10003	.	+
Chr2S	71271038	71271089	XBXL10_1g10004	.	+
Chr2S	71440723	71440774	XBXL10_1g10008	X	+
Chr1L	60528816	60528867	XBXL10_1g1001	X	+
Chr2S	71709699	71709750	XBXL10_1g10014	X	+
Chr2S	71788941	71788992	XBXL10_1g10016	X	+
Chr2S	71869880	71869931	XBXL10_1g10019	X	+
Chr2S	72045264	72045315	XBXL10_1g10022	X	+
Chr1L	60861161	60861212	XBXL10_1g1003	X	+
Chr2S	72698232	72698283	XBXL10_1g10031	X	+
Chr2S	73036995	73037046	XBXL10_1g10037	X	+
Chr2S	73129654	73129705	XBXL10_1g10040	X	+
Chr2S	73222808	73222859	XBXL10_1g10041	X	+
Chr2S	73270017	73270068	XBXL10_1g10042	X	+
Chr2S	73358125	73358176	XBXL10_1g10045	X	+
Chr2S	73429308	73429359	XBXL10_1g10047	X	+
Chr2S	73584111	73584162	XBXL10_1g10048	X	+
Chr2S	73624580	73624631	XBXL10_1g10049	X	+
Chr2S	73642619	73642670	XBXL10_1g10050	X	+
Chr2S	73663377	73663428	XBXL10_1g10051	X	+
Chr2S	73720793	73720844	XBXL10_1g10052	.	+
Chr2S	74166430	74166481	XBXL10_1g10058	.	+
Chr2S	74470202	74470253	XBXL10_1g10059	.	+
Chr2S	74499078	74499129	XBXL10_1g10060	.	+
Chr2S	74702223	74702274	XBXL10_1g10064	X	+
Chr2S	74725433	74725484	XBXL10_1g10065	X	+
Chr2S	74932072	74932123	XBXL10_1g10066	X	+
Chr2S	74977688	74977739	XBXL10_1g10067	.	+
Chr2S	75046664	75046715	XBXL10_1g10069	X	+
Chr1L	61375655	61375706	XBXL10_1g1007	X	+
Chr2S	75111104	75111155	XBXL10_1g10076	X	+
Chr2S	75182183	75182234	XBXL10_1g10078	X	+
Chr2S	75260559	75260610	XBXL10_1g10081	X	+
Chr2S	75269355	75269406	XBXL10_1g10082	X	+
Chr2S	75276354	75276405	XBXL10_1g10083	X	+
Chr2S	75579234	75579285	XBXL10_1g10085	X	+
Chr2S	75682912	75682963	XBXL10_1g10086	.	+
Chr2S	76163371	76163422	XBXL10_1g10088	X	+
Chr2S	76443353	76443404	XBXL10_1g10090	X	+
Chr2S	76466362	76466413	XBXL10_1g10091	X	+
Chr2S	76484006	76484057	XBXL10_1g10092	X	+
Chr2S	76503749	76503800	XBXL10_1g10093	.	+
Chr2S	76619215	76619266	XBXL10_1g10095	.	+
Chr2S	77048297	77048348	XBXL10_1g10096	.	+
Chr1L	61602031	61602082	XBXL10_1g1010	X	+
Chr2S	77821204	77821255	XBXL10_1g10100	.	+
Chr2S	77823773	77823824	XBXL10_1g10101	X	+
Chr2S	77875799	77875850	XBXL10_1g10102	X	+
Chr2S	77901316	77901367	XBXL10_1g10104	X	+
Chr2S	77964004	77964055	XBXL10_1g10106	X	+
Chr2S	78004815	78004866	XBXL10_1g10108	X	+
Chr2S	78014176	78014227	XBXL10_1g10109	X	+
Chr2S	78020975	78021026	XBXL10_1g10110	X	+
Chr2S	78050470	78050521	XBXL10_1g10111	X	+
Chr2S	78170198	78170249	XBXL10_1g10112	X	+
Chr2S	78207108	78207159	XBXL10_1g10113	X	+
Chr2S	78773964	78774015	XBXL10_1g10115	.	+
Chr2S	79108994	79109045	XBXL10_1g10116	.	+
Chr2S	79203099	79203150	XBXL10_1g10117	X	+
Chr2S	79369280	79369331	XBXL10_1g10120	X	+
Chr2S	79450539	79450590	XBXL10_1g10122	X	+
Chr2S	79544575	79544626	XBXL10_1g10124	.	+
Chr2S	80596945	80596996	XBXL10_1g10126	X	+
Chr2S	80644123	80644174	XBXL10_1g10127	X	+
Chr2S	80649109	80649160	XBXL10_1g10128	X	+
Chr2S	80657855	80657906	XBXL10_1g10129	.	+
Chr1L	61871055	61871106	XBXL10_1g1013	X	+
Chr2S	80694156	80694207	XBXL10_1g10131	.	+
Chr2S	81106582	81106633	XBXL10_1g10140	.	+
Chr2S	81124072	81124123	XBXL10_1g10141	X	+
Chr2S	81235442	81235493	XBXL10_1g10144	X	+
Chr2S	81351697	81351748	XBXL10_1g10145	.	+
Chr2S	81420312	81420363	XBXL10_1g10146	X	+
Chr2S	81443532	81443583	XBXL10_1g10147	X	+
Chr2S	81495528	81495579	XBXL10_1g10148	X	+
Chr2S	81569363	81569414	XBXL10_1g10149	.	+
Chr2S	81653291	81653342	XBXL10_1g10150	X	+
Chr2S	81666311	81666362	XBXL10_1g10151	X	+
Chr2S	81799789	81799840	XBXL10_1g10155	X	+
Chr2S	81821317	81821368	XBXL10_1g10157	X	+
Chr2S	81843100	81843151	XBXL10_1g10158	X	+
Chr2S	81845297	81845348	XBXL10_1g10159	X	+
Chr2S	81864306	81864357	XBXL10_1g10160	.	+
Chr2S	81874008	81874059	XBXL10_1g10161	X	+
Chr2S	81914124	81914175	XBXL10_1g10163	X	+
Chr2S	81923499	81923550	XBXL10_1g10164	X	+
Chr2S	81956559	81956610	XBXL10_1g10166	X	+
Chr2S	81966763	81966814	XBXL10_1g10167	X	+
Chr2S	82003621	82003672	XBXL10_1g10169	X	+
Chr1L	62130695	62130746	XBXL10_1g1017	.	+
Chr2S	82042292	82042343	XBXL10_1g10171	X	+
Chr2S	82076464	82076515	XBXL10_1g10173	X	+
Chr2S	82152962	82153013	XBXL10_1g10175	X	+
Chr2S	82275718	82275769	XBXL10_1g10181	X	+
Chr2S	82284589	82284640	XBXL10_1g10182	.	+
Chr2S	82308680	82308731	XBXL10_1g10183	.	+
Chr2S	82360085	82360136	XBXL10_1g10184	X	+
Chr2S	82391025	82391076	XBXL10_1g10185	X	+
Chr2S	82526867	82526918	XBXL10_1g10186	.	+
Chr2S	82609774	82609825	XBXL10_1g10188	X	+
Chr1L	62188763	62188814	XBXL10_1g1019	X	+
Chr2S	82684988	82685039	XBXL10_1g10193	X	+
Chr2S	82794950	82795001	XBXL10_1g10196	X	+
Chr2S	82890534	82890585	XBXL10_1g10198	.	+
Chr2S	82920805	82920856	XBXL10_1g10199	.	+
Chr2S	83150635	83150686	XBXL10_1g10201	.	+
Chr2S	83221731	83221782	XBXL10_1g10202	X	+
Chr2S	83269965	83270016	XBXL10_1g10203	X	+
Chr2S	83355083	83355134	XBXL10_1g10205	X	+
Chr2S	83529530	83529581	XBXL10_1g10207	X	+
Chr2S	83672071	83672122	XBXL10_1g10208	X	+
Chr2S	83745472	83745523	XBXL10_1g10209	X	+
Chr2S	83881363	83881414	XBXL10_1g10210	.	+
Chr2S	84252855	84252906	XBXL10_1g10213	.	+
Chr2S	84691280	84691331	XBXL10_1g10214	X	+
Chr2S	84983555	84983606	XBXL10_1g10217	X	+
Chr2S	85054267	85054318	XBXL10_1g10218	X	+
Chr2S	85257505	85257556	XBXL10_1g10220	X	+
Chr2S	85286151	85286202	XBXL10_1g10221	X	+
Chr2S	85367369	85367420	XBXL10_1g10222	X	+
Chr2S	85438089	85438140	XBXL10_1g10224	X	+
Chr2S	85479186	85479237	XBXL10_1g10226	X	+
Chr2S	85557113	85557164	XBXL10_1g10227	X	+
Chr1L	62407534	62407585	XBXL10_1g1023	X	+
Chr2S	85687621	85687672	XBXL10_1g10232	X	+
Chr2S	85691508	85691559	XBXL10_1g10233	X	+
Chr2S	85765117	85765168	XBXL10_1g10235	X	+
Chr2S	85963778	85963829	XBXL10_1g10236	X	+
Chr2S	86196827	86196878	XBXL10_1g10237	.	+
Chr2S	86241117	86241168	XBXL10_1g10238	X	+
Chr2S	86332134	86332185	XBXL10_1g10240	X	+
Chr2S	86357174	86357225	XBXL10_1g10241	X	+
Chr2S	86447397	86447448	XBXL10_1g10242	X	+
Chr2S	86526681	86526732	XBXL10_1g10245	X	+
Chr2S	86592256	86592307	XBXL10_1g10247	X	+
Chr2S	86705538	86705589	XBXL10_1g10248	.	+
Chr2S	86840295	86840346	XBXL10_1g10249	X	+
Chr1L	62567208	62567259	XBXL10_1g1025	X	+
Chr2S	86943264	86943315	XBXL10_1g10250	X	+
Chr2S	86927245	86927296	XBXL10_1g10251	X	+
Chr2S	87024227	87024278	XBXL10_1g10254	X	+
Chr2S	87045295	87045346	XBXL10_1g10255	X	+
Chr2S	87701087	87701138	XBXL10_1g10260	.	+
Chr2S	87844620	87844671	XBXL10_1g10263	X	+
Chr2S	87934608	87934659	XBXL10_1g10265	X	+
Chr2S	87998467	87998518	XBXL10_1g10267	X	+
Chr2S	88573208	88573259	XBXL10_1g10269	.	+
Chr2S	89512688	89512739	XBXL10_1g10276	X	+
Chr2S	89701804	89701855	XBXL10_1g10277	X	+
Chr1L	62685261	62685312	XBXL10_1g1028	.	+
Chr2S	89774802	89774853	XBXL10_1g10280	X	+
Chr2S	89780047	89780098	XBXL10_1g10281	X	+
Chr2S	89787742	89787793	XBXL10_1g10282	X	+
Chr2S	89827749	89827800	XBXL10_1g10284	X	+
Chr2S	89897748	89897799	XBXL10_1g10293	X	+
Chr2S	89986500	89986551	XBXL10_1g10295	.	+
Chr2S	90020902	90020953	XBXL10_1g10296	X	+
Chr1L	62759032	62759083	XBXL10_1g1030	.	+
Chr2S	90962235	90962286	XBXL10_1g10300	.	+
Chr2S	91863298	91863349	XBXL10_1g10305	X	+
Chr2S	91863665	91863716	XBXL10_1g10306	X	+
Chr2S	91864103	91864154	XBXL10_1g10307	X	+
Chr2S	91864607	91864658	XBXL10_1g10308	X	+
Chr2S	91864815	91864866	XBXL10_1g10309	X	+
Chr2S	91865731	91865782	XBXL10_1g10310	X	+
Chr2S	91866025	91866076	XBXL10_1g10311	X	+
Chr2S	91866291	91866342	XBXL10_1g10312	X	+
Chr2S	91893015	91893066	XBXL10_1g10313	X	+
Chr2S	92340880	92340931	XBXL10_1g10318	X	+
Chr1L	62851188	62851239	XBXL10_1g1032	X	+
Chr2S	92400676	92400727	XBXL10_1g10321	X	+
Chr2S	92642057	92642108	XBXL10_1g10323	X	+
Chr2S	92689051	92689102	XBXL10_1g10324	X	+
Chr2S	92745375	92745426	XBXL10_1g10325	X	+
Chr2S	92905817	92905868	XBXL10_1g10326	.	+
Chr2S	93066192	93066243	XBXL10_1g10327	X	+
Chr2S	93230465	93230516	XBXL10_1g10330	.	+
Chr2S	93285531	93285582	XBXL10_1g10331	X	+
Chr2S	93297782	93297833	XBXL10_1g10332	X	+
Chr2S	93334185	93334236	XBXL10_1g10333	X	+
Chr2S	93546145	93546196	XBXL10_1g10334	.	+
Chr2S	93626425	93626476	XBXL10_1g10335	.	+
Chr2S	94241871	94241922	XBXL10_1g10337	.	+
Chr2S	94363796	94363847	XBXL10_1g10338	X	+
Chr1L	62939818	62939869	XBXL10_1g1034	.	+
Chr2S	94977993	94978044	XBXL10_1g10340	.	+
Chr2S	95101831	95101882	XBXL10_1g10342	.	+
Chr2S	95134210	95134261	XBXL10_1g10345	X	+
Chr2S	95499187	95499238	XBXL10_1g10347	X	+
Chr2S	96081448	96081499	XBXL10_1g10350	X	+
Chr2S	96091185	96091236	XBXL10_1g10351	X	+
Chr2S	96214074	96214125	XBXL10_1g10352	X	+
Chr2S	96304487	96304538	XBXL10_1g10353	X	+
Chr2S	96430286	96430337	XBXL10_1g10354	X	+
Chr2S	96497693	96497744	XBXL10_1g10356	X	+
Chr2S	96559232	96559283	XBXL10_1g10358	X	+
Chr2S	96577895	96577946	XBXL10_1g10360	X	+
Chr2S	96640756	96640807	XBXL10_1g10363	X	+
Chr2S	96679841	96679892	XBXL10_1g10366	X	+
Chr2S	96700102	96700153	XBXL10_1g10367	X	+
Chr2S	96876771	96876822	XBXL10_1g10368	.	+
Chr2S	97102784	97102835	XBXL10_1g10370	X	+
Chr2S	97137347	97137398	XBXL10_1g10371	X	+
Chr2S	97272189	97272240	XBXL10_1g10373	X	+
Chr2S	97584399	97584450	XBXL10_1g10379	X	+
Chr2S	98042321	98042372	XBXL10_1g10381	.	+
Chr2S	98498004	98498055	XBXL10_1g10383	.	+
Chr2S	98552713	98552764	XBXL10_1g10384	X	+
Chr2S	99551942	99551993	XBXL10_1g10385	X	+
Chr2S	99893749	99893800	XBXL10_1g10386	X	+
Chr2S	100062482	100062533	XBXL10_1g10389	.	+
Chr2S	100078082	100078133	XBXL10_1g10390	X	+
Chr2S	100139123	100139174	XBXL10_1g10391	X	+
Chr2S	100171561	100171612	XBXL10_1g10392	.	+
Chr2S	100553053	100553104	XBXL10_1g10394	.	+
Chr1L	3864944	3864995	XBXL10_1g104	.	+
Chr1L	63014960	63015011	XBXL10_1g1040	X	+
Chr2S	101168033	101168084	XBXL10_1g10400	.	+
Chr2S	101369999	101370050	XBXL10_1g10402	X	+
Chr2S	101411107	101411158	XBXL10_1g10403	X	+
Chr2S	101554778	101554829	XBXL10_1g10406	.	+
Chr2S	101567371	101567422	XBXL10_1g10407	X	+
Chr2S	101641510	101641561	XBXL10_1g10409	X	+
Chr1L	63020010	63020061	XBXL10_1g1041	X	+
Chr2S	101758084	101758135	XBXL10_1g10412	X	+
Chr2S	101903252	101903303	XBXL10_1g10414	.	+
Chr2S	101989265	101989316	XBXL10_1g10416	X	+
Chr2S	102183980	102184031	XBXL10_1g10417	.	+
Chr2S	102294108	102294159	XBXL10_1g10418	.	+
Chr2S	102328026	102328077	XBXL10_1g10419	.	+
Chr2S	102424537	102424588	XBXL10_1g10420	.	+
Chr2S	102432602	102432653	XBXL10_1g10421	.	+
Chr2S	102638460	102638511	XBXL10_1g10422	X	+
Chr2S	102772428	102772479	XBXL10_1g10423	.	+
Chr2S	102823004	102823055	XBXL10_1g10424	.	+
Chr2S	102862973	102863024	XBXL10_1g10426	X	+
Chr2S	102983380	102983431	XBXL10_1g10429	X	+
Chr2S	102992248	102992299	XBXL10_1g10431	.	+
Chr2S	103024195	103024246	XBXL10_1g10432	.	+
Chr2S	103028912	103028963	XBXL10_1g10433	.	+
Chr2S	103120346	103120397	XBXL10_1g10436	X	+
Chr2S	103240217	103240268	XBXL10_1g10437	.	+
Chr2S	103345901	103345952	XBXL10_1g10439	.	+
Chr1L	63571137	63571188	XBXL10_1g1044	X	+
Chr2S	103477881	103477932	XBXL10_1g10442	.	+
Chr2S	103613991	103614042	XBXL10_1g10443	X	+
Chr2S	103701371	103701422	XBXL10_1g10445	X	+
Chr2S	103718467	103718518	XBXL10_1g10446	X	+
Chr2S	103728447	103728498	XBXL10_1g10447	X	+
Chr2S	103745056	103745107	XBXL10_1g10448	X	+
Chr2S	103764290	103764341	XBXL10_1g10449	X	+
Chr2S	103834149	103834200	XBXL10_1g10450	X	+
Chr2S	103906572	103906623	XBXL10_1g10452	X	+
Chr2S	103922340	103922391	XBXL10_1g10453	X	+
Chr2S	104156411	104156462	XBXL10_1g10455	.	+
Chr2S	104231339	104231390	XBXL10_1g10457	.	+
Chr2S	104634706	104634757	XBXL10_1g10459	.	+
Chr2S	104778375	104778426	XBXL10_1g10460	.	+
Chr2S	105530152	105530203	XBXL10_1g10464	X	+
Chr2S	105563990	105564041	XBXL10_1g10466	X	+
Chr2S	105727715	105727766	XBXL10_1g10469	X	+
Chr1L	63958049	63958100	XBXL10_1g1047	.	+
Chr2S	105746831	105746882	XBXL10_1g10470	X	+
Chr2S	105817006	105817057	XBXL10_1g10472	X	+
Chr2S	106175605	106175656	XBXL10_1g10474	X	+
Chr2S	106513724	106513775	XBXL10_1g10477	.	+
Chr2S	106595194	106595245	XBXL10_1g10479	X	+
Chr1L	64106157	64106208	XBXL10_1g1048	X	+
Chr2S	106623130	106623181	XBXL10_1g10480	.	+
Chr2S	106653375	106653426	XBXL10_1g10481	X	+
Chr2S	106760193	106760244	XBXL10_1g10484	X	+
Chr1L	64157499	64157550	XBXL10_1g1049	.	+
Chr2S	107050133	107050184	XBXL10_1g10492	X	+
Chr2S	107752048	107752099	XBXL10_1g10495	X	+
Chr2S	107802017	107802068	XBXL10_1g10497	X	+
Chr2S	107866635	107866686	XBXL10_1g10499	X	+
Chr1L	3897038	3897089	XBXL10_1g105	.	+
Chr2S	107992314	107992365	XBXL10_1g10501	.	+
Chr2S	108243288	108243339	XBXL10_1g10502	X	+
Chr2S	108574622	108574673	XBXL10_1g10505	X	+
Chr2S	108617341	108617392	XBXL10_1g10506	X	+
Chr2S	109133135	109133186	XBXL10_1g10507	X	+
Chr2S	109164436	109164487	XBXL10_1g10508	X	+
Chr2S	109794530	109794581	XBXL10_1g10509	X	+
Chr2S	109978240	109978291	XBXL10_1g10510	.	+
Chr2S	110176234	110176285	XBXL10_1g10511	.	+
Chr2S	110195065	110195116	XBXL10_1g10512	.	+
Chr2S	110239435	110239486	XBXL10_1g10513	X	+
Chr2S	110270094	110270145	XBXL10_1g10514	X	+
Chr2S	110280191	110280242	XBXL10_1g10515	.	+
Chr2S	110309936	110309987	XBXL10_1g10516	.	+
Chr2S	110358245	110358296	XBXL10_1g10518	X	+
Chr2S	110401445	110401496	XBXL10_1g10519	X	+
Chr1L	64212023	64212074	XBXL10_1g1052	X	+
Chr2S	110867327	110867378	XBXL10_1g10522	X	+
Chr2S	111061924	111061975	XBXL10_1g10523	.	+
Chr2S	111139677	111139728	XBXL10_1g10524	.	+
Chr2S	111437580	111437631	XBXL10_1g10527	.	+
Chr2S	111483749	111483800	XBXL10_1g10528	.	+
Chr1L	64284364	64284415	XBXL10_1g1053	X	+
Chr2S	111720105	111720156	XBXL10_1g10531	.	+
Chr2S	111763827	111763878	XBXL10_1g10532	.	+
Chr2S	111792633	111792684	XBXL10_1g10533	.	+
Chr2S	111827203	111827254	XBXL10_1g10534	X	+
Chr2S	111992415	111992466	XBXL10_1g10535	.	+
Chr2S	112031599	112031650	XBXL10_1g10536	.	+
Chr2S	112251269	112251320	XBXL10_1g10540	X	+
Chr2S	112840768	112840819	XBXL10_1g10544	X	+
Chr2S	113095537	113095588	XBXL10_1g10546	X	+
Chr2S	113315255	113315306	XBXL10_1g10547	X	+
Chr2S	113370834	113370885	XBXL10_1g10549	X	+
Chr2S	115342631	115342682	XBXL10_1g10557	.	+
Chr2S	115997367	115997418	XBXL10_1g10558	X	+
Chr2S	116268773	116268824	XBXL10_1g10560	X	+
Chr2S	116548465	116548516	XBXL10_1g10561	X	+
Chr2S	116577622	116577673	XBXL10_1g10562	X	+
Chr2S	116736171	116736222	XBXL10_1g10564	.	+
Chr2S	116869470	116869521	XBXL10_1g10565	.	+
Chr2S	117078160	117078211	XBXL10_1g10569	X	+
Chr1L	64457756	64457807	XBXL10_1g1057	.	+
Chr2S	117238992	117239043	XBXL10_1g10570	X	+
Chr2S	117277079	117277130	XBXL10_1g10571	.	+
Chr2S	117314945	117314996	XBXL10_1g10572	.	+
Chr2S	117663264	117663315	XBXL10_1g10575	X	+
Chr2S	117673852	117673903	XBXL10_1g10576	X	+
Chr2S	117688482	117688533	XBXL10_1g10577	X	+
Chr2S	117863736	117863787	XBXL10_1g10579	X	+
Chr2S	118254127	118254178	XBXL10_1g10582	X	+
Chr2S	118273520	118273571	XBXL10_1g10584	X	+
Chr2S	118521900	118521951	XBXL10_1g10585	.	+
Chr2S	119166674	119166725	XBXL10_1g10588	X	+
Chr2S	120888642	120888693	XBXL10_1g10591	X	+
Chr2S	123553383	123553434	XBXL10_1g10595	.	+
Chr2S	123669027	123669078	XBXL10_1g10597	X	+
Chr1L	3915928	3915979	XBXL10_1g106	.	+
Chr2S	123845397	123845448	XBXL10_1g10601	X	+
Chr2S	123855919	123855970	XBXL10_1g10603	X	+
Chr2S	123939241	123939292	XBXL10_1g10606	X	+
Chr2S	124144351	124144402	XBXL10_1g10608	X	+
Chr2S	124269453	124269504	XBXL10_1g10609	X	+
Chr1L	64720811	64720862	XBXL10_1g1061	X	+
Chr2S	124341542	124341593	XBXL10_1g10610	X	+
Chr2S	124478939	124478990	XBXL10_1g10611	X	+
Chr2S	124978712	124978763	XBXL10_1g10614	.	+
Chr2S	125088789	125088840	XBXL10_1g10615	.	+
Chr2S	125216124	125216175	XBXL10_1g10617	X	+
Chr2S	125282895	125282946	XBXL10_1g10619	X	+
Chr1L	64769281	64769332	XBXL10_1g1062	X	+
Chr2S	125319166	125319217	XBXL10_1g10620	X	+
Chr2S	125340338	125340389	XBXL10_1g10622	X	+
Chr2S	125345684	125345735	XBXL10_1g10623	X	+
Chr2S	125434713	125434764	XBXL10_1g10628	X	+
Chr2S	125461172	125461223	XBXL10_1g10629	X	+
Chr2S	125745980	125746031	XBXL10_1g10631	X	+
Chr2S	125868937	125868988	XBXL10_1g10635	X	+
Chr2S	125990839	125990890	XBXL10_1g10637	X	+
Chr1L	64810316	64810367	XBXL10_1g1064	X	+
Chr2S	126440220	126440271	XBXL10_1g10642	X	+
Chr2S	126587231	126587282	XBXL10_1g10645	.	+
Chr2S	126645236	126645287	XBXL10_1g10646	X	+
Chr2S	126709199	126709250	XBXL10_1g10647	X	+
Chr2S	126846286	126846337	XBXL10_1g10648	X	+
Chr2S	126961903	126961954	XBXL10_1g10649	X	+
Chr2S	127077639	127077690	XBXL10_1g10652	X	+
Chr2S	127238463	127238514	XBXL10_1g10658	.	+
Chr1L	64877511	64877562	XBXL10_1g1066	X	+
Chr2S	127267232	127267283	XBXL10_1g10660	X	+
Chr2S	127447471	127447522	XBXL10_1g10661	X	+
Chr2S	127624224	127624275	XBXL10_1g10665	X	+
Chr2S	127639615	127639666	XBXL10_1g10666	X	+
Chr2S	127776349	127776400	XBXL10_1g10669	.	+
Chr2S	127849816	127849867	XBXL10_1g10670	X	+
Chr2S	128040771	128040822	XBXL10_1g10674	X	+
Chr2S	128209062	128209113	XBXL10_1g10680	X	+
Chr2S	128250465	128250516	XBXL10_1g10681	X	+
Chr2S	128474003	128474054	XBXL10_1g10683	.	+
Chr2S	128485536	128485587	XBXL10_1g10684	X	+
Chr2S	128528655	128528706	XBXL10_1g10685	X	+
Chr2S	128671661	128671712	XBXL10_1g10687	X	+
Chr2S	128690084	128690135	XBXL10_1g10688	X	+
Chr1L	65548010	65548061	XBXL10_1g1069	X	+
Chr2S	128758417	128758468	XBXL10_1g10690	.	+
Chr2S	128793740	128793791	XBXL10_1g10691	.	+
Chr2S	128826342	128826393	XBXL10_1g10693	X	+
Chr2S	128848621	128848672	XBXL10_1g10694	X	+
Chr2S	128912340	128912391	XBXL10_1g10696	X	+
Chr2S	128940954	128941005	XBXL10_1g10698	X	+
Chr1L	3956465	3956516	XBXL10_1g107	.	+
Chr2S	129040084	129040135	XBXL10_1g10700	X	+
Chr2S	129069751	129069802	XBXL10_1g10702	X	+
Chr2S	129246840	129246891	XBXL10_1g10708	X	+
Chr1L	65935107	65935158	XBXL10_1g1071	.	+
Chr2S	129445041	129445092	XBXL10_1g10714	X	+
Chr2S	129472388	129472439	XBXL10_1g10716	X	+
Chr2S	129664330	129664381	XBXL10_1g10721	X	+
Chr2S	129721414	129721465	XBXL10_1g10722	X	+
Chr2S	129874455	129874506	XBXL10_1g10725	X	+
Chr2S	129956850	129956901	XBXL10_1g10727	X	+
Chr2S	130072427	130072478	XBXL10_1g10729	.	+
Chr2S	130193887	130193938	XBXL10_1g10733	X	+
Chr2S	130207861	130207912	XBXL10_1g10734	.	+
Chr2S	130245964	130246015	XBXL10_1g10735	X	+
Chr2S	130407056	130407107	XBXL10_1g10741	X	+
Chr2S	130483175	130483226	XBXL10_1g10744	.	+
Chr2S	130787518	130787569	XBXL10_1g10749	.	+
Chr2S	131021715	131021766	XBXL10_1g10751	X	+
Chr2S	131263004	131263055	XBXL10_1g10752	.	+
Chr2S	131430003	131430054	XBXL10_1g10754	X	+
Chr2S	131873274	131873325	XBXL10_1g10758	X	+
Chr1L	67966285	67966336	XBXL10_1g1076	X	+
Chr2S	131956608	131956659	XBXL10_1g10760	.	+
Chr2S	132027136	132027187	XBXL10_1g10761	X	+
Chr2S	132164181	132164232	XBXL10_1g10762	.	+
Chr2S	132259078	132259129	XBXL10_1g10764	X	+
Chr2S	132308520	132308571	XBXL10_1g10766	X	+
Chr2S	132388268	132388319	XBXL10_1g10768	X	+
Chr2S	132477197	132477248	XBXL10_1g10769	X	+
Chr2S	132520700	132520751	XBXL10_1g10770	.	+
Chr2S	132612394	132612445	XBXL10_1g10771	.	+
Chr2S	132858731	132858782	XBXL10_1g10773	.	+
Chr2S	132971287	132971338	XBXL10_1g10775	X	+
Chr2S	133028892	133028943	XBXL10_1g10776	.	+
Chr2S	133049322	133049373	XBXL10_1g10777	.	+
Chr2S	133077385	133077436	XBXL10_1g10778	.	+
Chr1L	68191259	68191310	XBXL10_1g1078	X	+
Chr2S	133283719	133283770	XBXL10_1g10781	X	+
Chr2S	133338005	133338056	XBXL10_1g10782	X	+
Chr2S	133593282	133593333	XBXL10_1g10784	X	+
Chr2S	133639832	133639883	XBXL10_1g10785	X	+
Chr2S	133686856	133686907	XBXL10_1g10787	.	+
Chr2S	133859986	133860037	XBXL10_1g10790	X	+
Chr2S	133966680	133966731	XBXL10_1g10793	X	+
Chr1L	3987844	3987895	XBXL10_1g108	.	+
Chr2S	134213231	134213282	XBXL10_1g10800	.	+
Chr2S	134246715	134246766	XBXL10_1g10801	.	+
Chr2S	134817587	134817638	XBXL10_1g10804	X	+
Chr2S	135096422	135096473	XBXL10_1g10809	X	+
Chr1L	68251897	68251948	XBXL10_1g1081	X	+
Chr2S	135104569	135104620	XBXL10_1g10810	X	+
Chr2S	135276453	135276504	XBXL10_1g10813	.	+
Chr2S	135398480	135398531	XBXL10_1g10814	.	+
Chr2S	135612458	135612509	XBXL10_1g10815	.	+
Chr2S	135850438	135850489	XBXL10_1g10816	.	+
Chr2S	135935429	135935480	XBXL10_1g10817	X	+
Chr2S	135982512	135982563	XBXL10_1g10818	X	+
Chr2S	136045170	136045221	XBXL10_1g10819	X	+
Chr2S	136127692	136127743	XBXL10_1g10822	.	+
Chr2S	136194458	136194509	XBXL10_1g10824	.	+
Chr2S	136689442	136689493	XBXL10_1g10826	X	+
Chr2S	136962214	136962265	XBXL10_1g10828	X	+
Chr2S	137024818	137024869	XBXL10_1g10829	X	+
Chr1L	68294289	68294340	XBXL10_1g1083	X	+
Chr2S	137217164	137217215	XBXL10_1g10831	X	+
Chr2S	137243102	137243153	XBXL10_1g10833	X	+
Chr2S	137809527	137809578	XBXL10_1g10843	.	+
Chr2S	138180085	138180136	XBXL10_1g10846	X	+
Chr2S	138275036	138275087	XBXL10_1g10848	X	+
Chr2S	138290219	138290270	XBXL10_1g10849	X	+
Chr2S	138384540	138384591	XBXL10_1g10850	.	+
Chr2S	138418317	138418368	XBXL10_1g10852	X	+
Chr2S	138653972	138654023	XBXL10_1g10857	.	+
Chr2S	138872366	138872417	XBXL10_1g10862	X	+
Chr2S	139100531	139100582	XBXL10_1g10865	X	+
Chr2S	139377404	139377455	XBXL10_1g10869	X	+
Chr1L	69286228	69286279	XBXL10_1g1087	X	+
Chr2S	139450530	139450581	XBXL10_1g10870	.	+
Chr2S	139480369	139480420	XBXL10_1g10871	.	+
Chr2S	139493563	139493614	XBXL10_1g10872	.	+
Chr2S	139518774	139518825	XBXL10_1g10873	.	+
Chr2S	139535828	139535879	XBXL10_1g10874	.	+
Chr2S	139549570	139549621	XBXL10_1g10875	.	+
Chr2S	139581985	139582036	XBXL10_1g10876	X	+
Chr2S	139605387	139605438	XBXL10_1g10877	X	+
Chr2S	139638701	139638752	XBXL10_1g10878	.	+
Chr2S	139669412	139669463	XBXL10_1g10879	.	+
Chr2S	139744679	139744730	XBXL10_1g10881	.	+
Chr2S	139866200	139866251	XBXL10_1g10883	.	+
Chr2S	139920591	139920642	XBXL10_1g10884	.	+
Chr2S	139976815	139976866	XBXL10_1g10885	.	+
Chr2S	140062069	140062120	XBXL10_1g10886	.	+
Chr2S	140099499	140099550	XBXL10_1g10887	X	+
Chr2S	140267074	140267125	XBXL10_1g10889	.	+
Chr2S	140429001	140429052	XBXL10_1g10890	X	+
Chr2S	140464045	140464096	XBXL10_1g10891	X	+
Chr2S	140508351	140508402	XBXL10_1g10893	X	+
Chr2S	140629768	140629819	XBXL10_1g10896	X	+
Chr2S	140659814	140659865	XBXL10_1g10897	X	+
Chr2S	140770449	140770500	XBXL10_1g10898	X	+
Chr1L	69915065	69915116	XBXL10_1g1090	X	+
Chr2S	140860960	140861011	XBXL10_1g10900	X	+
Chr2S	140893987	140894038	XBXL10_1g10901	X	+
Chr2S	140915251	140915302	XBXL10_1g10902	X	+
Chr2S	140947512	140947563	XBXL10_1g10903	.	+
Chr2S	141028980	141029031	XBXL10_1g10905	X	+
Chr2S	141136357	141136408	XBXL10_1g10909	X	+
Chr2S	141598851	141598902	XBXL10_1g10913	.	+
Chr2S	141649060	141649111	XBXL10_1g10914	.	+
Chr2S	141739770	141739821	XBXL10_1g10916	X	+
Chr2S	141750777	141750828	XBXL10_1g10917	X	+
Chr2S	141850775	141850826	XBXL10_1g10919	.	+
Chr2S	141918667	141918718	XBXL10_1g10922	X	+
Chr2S	141984347	141984398	XBXL10_1g10924	X	+
Chr2S	142122032	142122083	XBXL10_1g10925	X	+
Chr2S	142477141	142477192	XBXL10_1g10927	X	+
Chr1L	69993462	69993513	XBXL10_1g1093	X	+
Chr2S	142692561	142692612	XBXL10_1g10930	X	+
Chr2S	142739876	142739927	XBXL10_1g10931	.	+
Chr2S	143135011	143135062	XBXL10_1g10934	.	+
Chr2S	143279831	143279882	XBXL10_1g10935	.	+
Chr2S	143502603	143502654	XBXL10_1g10936	X	+
Chr2S	143584215	143584266	XBXL10_1g10938	X	+
Chr2S	143672860	143672911	XBXL10_1g10940	X	+
Chr2S	143905790	143905841	XBXL10_1g10945	.	+
Chr2S	143953024	143953075	XBXL10_1g10946	.	+
Chr2S	144346949	144347000	XBXL10_1g10948	X	+
Chr2S	144863417	144863468	XBXL10_1g10949	X	+
Chr1L	70141187	70141238	XBXL10_1g1095	.	+
Chr2S	145178792	145178843	XBXL10_1g10952	X	+
Chr2S	145204206	145204257	XBXL10_1g10953	X	+
Chr2S	145609481	145609532	XBXL10_1g10955	.	+
Chr2S	146012880	146012931	XBXL10_1g10957	X	+
Chr2S	146138378	146138429	XBXL10_1g10962	X	+
Chr2S	146138806	146138857	XBXL10_1g10963	X	+
Chr2S	146139100	146139151	XBXL10_1g10964	X	+
Chr2S	146143466	146143517	XBXL10_1g10965	X	+
Chr2S	146178753	146178804	XBXL10_1g10967	X	+
Chr2S	146245558	146245609	XBXL10_1g10968	X	+
Chr2S	146423172	146423223	XBXL10_1g10969	X	+
Chr1L	70413932	70413983	XBXL10_1g1097	.	+
Chr2S	146519491	146519542	XBXL10_1g10970	.	+
Chr2S	146857195	146857246	XBXL10_1g10972	X	+
Chr2S	146864562	146864613	XBXL10_1g10973	X	+
Chr2S	146877982	146878033	XBXL10_1g10974	X	+
Chr2S	146898225	146898276	XBXL10_1g10975	.	+
Chr2S	146980276	146980327	XBXL10_1g10976	.	+
Chr2S	147100157	147100208	XBXL10_1g10978	.	+
Chr2S	147194344	147194395	XBXL10_1g10979	X	+
Chr1L	70523078	70523129	XBXL10_1g1098	X	+
Chr2S	147248242	147248293	XBXL10_1g10980	X	+
Chr2S	147429174	147429225	XBXL10_1g10984	.	+
Chr2S	147646036	147646087	XBXL10_1g10988	X	+
Chr2S	147761966	147762017	XBXL10_1g10989	.	+
Chr2S	148550816	148550867	XBXL10_1g10994	.	+
Chr2S	148607200	148607251	XBXL10_1g10995	.	+
Chr2S	148614144	148614195	XBXL10_1g10996	X	+
Chr2S	148775680	148775731	XBXL10_1g10997	X	+
Chr2S	148839365	148839416	XBXL10_1g10998	X	+
Chr1L	421578	421629	XBXL10_1g11	.	+
Chr1L	4178079	4178130	XBXL10_1g110	.	+
Chr1L	70574470	70574521	XBXL10_1g1100	X	+
Chr2S	149227274	149227325	XBXL10_1g11001	X	+
Chr2S	149622690	149622741	XBXL10_1g11003	X	+
Chr2S	149810176	149810227	XBXL10_1g11005	X	+
Chr2S	149875183	149875234	XBXL10_1g11007	.	+
Chr2S	149939253	149939304	XBXL10_1g11008	X	+
Chr2S	150046509	150046560	XBXL10_1g11009	X	+
Chr2S	150130552	150130603	XBXL10_1g11012	X	+
Chr2S	150213169	150213220	XBXL10_1g11014	.	+
Chr2S	150233856	150233907	XBXL10_1g11015	.	+
Chr2S	150517036	150517087	XBXL10_1g11019	X	+
Chr1L	70615487	70615538	XBXL10_1g1102	X	+
Chr2S	150528968	150529019	XBXL10_1g11020	X	+
Chr2S	150631930	150631981	XBXL10_1g11021	X	+
Chr2S	150704277	150704328	XBXL10_1g11022	X	+
Chr2S	150956950	150957001	XBXL10_1g11028	.	+
Chr2S	151793930	151793981	XBXL10_1g11036	.	+
Chr2S	152033982	152034033	XBXL10_1g11038	X	+
Chr1L	70678374	70678425	XBXL10_1g1104	X	+
Chr2S	152077003	152077054	XBXL10_1g11040	X	+
Chr2S	152591587	152591638	XBXL10_1g11045	X	+
Chr2S	152729520	152729571	XBXL10_1g11047	.	+
Chr2S	152731988	152732039	XBXL10_1g11048	.	+
Chr2S	152734206	152734257	XBXL10_1g11049	X	+
Chr2S	152743447	152743498	XBXL10_1g11050	.	+
Chr2S	152805509	152805560	XBXL10_1g11051	X	+
Chr2S	152867978	152868029	XBXL10_1g11052	X	+
Chr2S	153047287	153047338	XBXL10_1g11055	X	+
Chr2S	153367297	153367348	XBXL10_1g11056	.	+
Chr2S	153394413	153394464	XBXL10_1g11057	.	+
Chr2S	153509596	153509647	XBXL10_1g11058	.	+
Chr1L	70890964	70891015	XBXL10_1g1106	X	+
Chr2S	153618375	153618426	XBXL10_1g11060	X	+
Chr2S	153849802	153849853	XBXL10_1g11062	X	+
Chr2S	154051562	154051613	XBXL10_1g11064	X	+
Chr2S	154195511	154195562	XBXL10_1g11065	.	+
Chr2S	154452825	154452876	XBXL10_1g11067	X	+
Chr2S	155528728	155528779	XBXL10_1g11069	X	+
Chr2S	155934160	155934211	XBXL10_1g11070	X	+
Chr2S	156083135	156083186	XBXL10_1g11072	X	+
Chr2S	156139181	156139232	XBXL10_1g11074	X	+
Chr2S	156196390	156196441	XBXL10_1g11075	X	+
Chr2S	156342530	156342581	XBXL10_1g11078	X	+
Chr1L	70916983	70917034	XBXL10_1g1108	X	+
Chr2S	156909573	156909624	XBXL10_1g11085	X	+
Chr2S	157200548	157200599	XBXL10_1g11090	X	+
Chr2S	157328246	157328297	XBXL10_1g11092	.	+
Chr2S	157335260	157335311	XBXL10_1g11093	.	+
Chr2S	157342321	157342372	XBXL10_1g11094	.	+
Chr2S	157354171	157354222	XBXL10_1g11095	.	+
Chr2S	157374214	157374265	XBXL10_1g11096	.	+
Chr2S	157375974	157376025	XBXL10_1g11097	.	+
Chr2S	157398007	157398058	XBXL10_1g11098	.	+
Chr2S	157399349	157399400	XBXL10_1g11099	.	+
Chr2S	157758810	157758861	XBXL10_1g11101	X	+
Chr2S	158776689	158776740	XBXL10_1g11104	X	+
Chr2S	158794878	158794929	XBXL10_1g11105	X	+
Chr2S	158796494	158796545	XBXL10_1g11106	X	+
Chr2S	158843905	158843956	XBXL10_1g11107	X	+
Chr2S	158852521	158852572	XBXL10_1g11108	X	+
Chr2S	159010448	159010499	XBXL10_1g11110	.	+
Chr2S	159232127	159232178	XBXL10_1g11112	X	+
Chr2S	159441706	159441757	XBXL10_1g11113	X	+
Chr2S	159480827	159480878	XBXL10_1g11114	.	+
Chr2S	159880982	159881033	XBXL10_1g11116	X	+
Chr2S	160159505	160159556	XBXL10_1g11119	.	+
Chr2S	160234593	160234644	XBXL10_1g11121	.	+
Chr2S	160272750	160272801	XBXL10_1g11123	X	+
Chr2S	160368130	160368181	XBXL10_1g11126	X	+
Chr2S	161000125	161000176	XBXL10_1g11132	X	+
Chr2S	162145916	162145967	XBXL10_1g11149	X	+
Chr1L	71015583	71015634	XBXL10_1g1115	X	+
Chr2S	162212452	162212503	XBXL10_1g11151	X	+
Chr2S	163256489	163256540	XBXL10_1g11159	.	+
Chr2S	163263848	163263899	XBXL10_1g11160	.	+
Chr2S	163288454	163288505	XBXL10_1g11161	.	+
Chr2S	163290764	163290815	XBXL10_1g11162	.	+
Chr2S	163292841	163292892	XBXL10_1g11163	.	+
Chr2S	163296428	163296479	XBXL10_1g11164	.	+
Chr2S	163331364	163331415	XBXL10_1g11165	X	+
Chr2S	163533179	163533230	XBXL10_1g11168	X	+
Chr2S	163820744	163820795	XBXL10_1g11173	.	+
Chr2S	163949530	163949581	XBXL10_1g11175	X	+
Chr2S	164161245	164161296	XBXL10_1g11176	.	+
Chr1L	71419218	71419269	XBXL10_1g1118	X	+
Chr2S	164614296	164614347	XBXL10_1g11180	X	+
Chr2S	164881228	164881279	XBXL10_1g11184	X	+
Chr2S	165013238	165013289	XBXL10_1g11185	X	+
Chr2S	165017749	165017800	XBXL10_1g11186	X	+
Chr2S	165020029	165020080	XBXL10_1g11187	X	+
Chr2S	165021847	165021898	XBXL10_1g11188	X	+
Chr2S	165024073	165024124	XBXL10_1g11189	X	+
Chr1L	71473199	71473250	XBXL10_1g1119	X	+
Chr2S	165026679	165026730	XBXL10_1g11190	X	+
Chr2S	165493248	165493299	XBXL10_1g11198	.	+
Chr2S	165583408	165583459	XBXL10_1g11201	X	+
Chr2S	165597333	165597384	XBXL10_1g11203	X	+
Chr2S	165795006	165795057	XBXL10_1g11213	X	+
Chr2S	165811296	165811347	XBXL10_1g11215	.	+
Chr2S	165839207	165839258	XBXL10_1g11216	.	+
Chr2S	165848461	165848512	XBXL10_1g11217	.	+
Chr2S	165901946	165901997	XBXL10_1g11218	.	+
Chr2S	165916997	165917048	XBXL10_1g11219	.	+
Chr2S	165927922	165927973	XBXL10_1g11220	.	+
Chr2S	165937567	165937618	XBXL10_1g11221	X	+
Chr2S	165977371	165977422	XBXL10_1g11223	X	+
Chr2S	166034554	166034605	XBXL10_1g11224	X	+
Chr2S	166054509	166054560	XBXL10_1g11225	X	+
Chr2S	166076992	166077043	XBXL10_1g11227	X	+
Chr2S	166230693	166230744	XBXL10_1g11229	.	+
Chr2S	166254054	166254105	XBXL10_1g11230	X	+
Chr2S	166279351	166279402	XBXL10_1g11232	X	+
Chr2S	166352128	166352179	XBXL10_1g11233	X	+
Chr2S	166439660	166439711	XBXL10_1g11235	.	+
Chr2S	166446714	166446765	XBXL10_1g11236	X	+
Chr2S	166490266	166490317	XBXL10_1g11237	X	+
Chr2S	166504663	166504714	XBXL10_1g11238	X	+
Chr2S	166510055	166510106	XBXL10_1g11239	X	+
Chr1L	72154856	72154907	XBXL10_1g1124	.	+
Chr2S	166517366	166517417	XBXL10_1g11240	X	+
Chr2S	166696774	166696825	XBXL10_1g11245	.	+
Chr2S	166705467	166705518	XBXL10_1g11246	.	+
Chr2S	166722779	166722830	XBXL10_1g11247	.	+
Chr2S	166764928	166764979	XBXL10_1g11250	.	+
Chr2S	166775471	166775522	XBXL10_1g11251	.	+
Chr2S	166787728	166787779	XBXL10_1g11252	.	+
Chr2S	166798395	166798446	XBXL10_1g11253	.	+
Chr2S	166806665	166806716	XBXL10_1g11254	.	+
Chr2S	166812741	166812792	XBXL10_1g11255	.	+
Chr2S	166820255	166820306	XBXL10_1g11256	.	+
Chr2S	166836640	166836691	XBXL10_1g11257	.	+
Chr1L	72275756	72275807	XBXL10_1g1126	X	+
Chr2S	166921911	166921962	XBXL10_1g11261	X	+
Chr2S	167458857	167458908	XBXL10_1g11265	X	+
Chr2S	167674502	167674553	XBXL10_1g11270	.	+
Chr2S	167717889	167717940	XBXL10_1g11271	X	+
Chr2S	167734729	167734780	XBXL10_1g11273	X	+
Chr2S	167756345	167756396	XBXL10_1g11274	.	+
Chr2S	167766558	167766609	XBXL10_1g11275	X	+
Chr2S	167775609	167775660	XBXL10_1g11276	.	+
Chr2S	167791660	167791711	XBXL10_1g11277	.	+
Chr2S	167818103	167818154	XBXL10_1g11278	X	+
Chr2S	167820133	167820184	XBXL10_1g11279	X	+
Chr2S	167837275	167837326	XBXL10_1g11280	X	+
Chr2S	168117377	168117428	XBXL10_1g11287	X	+
Chr2S	168177156	168177207	XBXL10_1g11289	X	+
Chr1L	72478690	72478741	XBXL10_1g1129	X	+
Chr2S	168222315	168222366	XBXL10_1g11291	X	+
Chr2S	168238585	168238636	XBXL10_1g11292	X	+
Chr1L	4303541	4303592	XBXL10_1g113	.	+
Chr1L	72491065	72491116	XBXL10_1g1130	.	+
Chr2S	168466233	168466284	XBXL10_1g11305	.	+
Chr2S	168493556	168493607	XBXL10_1g11306	.	+
Chr2S	168496877	168496928	XBXL10_1g11307	.	+
Chr2S	168535553	168535604	XBXL10_1g11308	.	+
Chr1L	72504416	72504467	XBXL10_1g1131	.	+
Chr2S	168567097	168567148	XBXL10_1g11310	X	+
Chr2S	168583939	168583990	XBXL10_1g11311	X	+
Chr2S	168618728	168618779	XBXL10_1g11312	.	+
Chr2S	168684328	168684379	XBXL10_1g11314	X	+
Chr2S	168775005	168775056	XBXL10_1g11317	X	+
Chr2S	168803617	168803668	XBXL10_1g11319	X	+
Chr1L	72561551	72561602	XBXL10_1g1132	.	+
Chr2S	168829024	168829075	XBXL10_1g11320	X	+
Chr2S	168940408	168940459	XBXL10_1g11323	X	+
Chr2S	168988300	168988351	XBXL10_1g11325	.	+
Chr2S	169007197	169007248	XBXL10_1g11326	.	+
Chr2S	169161847	169161898	XBXL10_1g11328	.	+
Chr2S	169177693	169177744	XBXL10_1g11329	.	+
Chr1L	72596357	72596408	XBXL10_1g1133	X	+
Chr2S	169188812	169188863	XBXL10_1g11330	X	+
Chr2S	169195569	169195620	XBXL10_1g11331	.	+
Chr2S	169219596	169219647	XBXL10_1g11332	.	+
Chr3L	119988	120039	XBXL10_1g11334	X	+
Chr3L	220052	220103	XBXL10_1g11336	X	+
Chr3L	273507	273558	XBXL10_1g11338	.	+
Chr1L	72614798	72614849	XBXL10_1g1134	X	+
Chr3L	516712	516763	XBXL10_1g11340	X	+
Chr3L	521013	521064	XBXL10_1g11341	X	+
Chr3L	581684	581735	XBXL10_1g11342	X	+
Chr3L	597232	597283	XBXL10_1g11343	X	+
Chr3L	671087	671138	XBXL10_1g11344	.	+
Chr3L	756341	756392	XBXL10_1g11345	.	+
Chr3L	778843	778894	XBXL10_1g11346	.	+
Chr3L	792329	792380	XBXL10_1g11347	.	+
Chr3L	814228	814279	XBXL10_1g11349	.	+
Chr3L	866793	866844	XBXL10_1g11350	.	+
Chr3L	912027	912078	XBXL10_1g11352	.	+
Chr3L	953776	953827	XBXL10_1g11355	X	+
Chr1L	72657807	72657858	XBXL10_1g1136	X	+
Chr3L	1108188	1108239	XBXL10_1g11361	X	+
Chr3L	1626268	1626319	XBXL10_1g11364	X	+
Chr3L	1674100	1674151	XBXL10_1g11366	X	+
Chr3L	1678663	1678714	XBXL10_1g11367	X	+
Chr3L	1706028	1706079	XBXL10_1g11369	X	+
Chr3L	1734493	1734544	XBXL10_1g11370	X	+
Chr3L	1927288	1927339	XBXL10_1g11374	X	+
Chr3L	1947316	1947367	XBXL10_1g11376	X	+
Chr3L	2071288	2071339	XBXL10_1g11379	X	+
Chr3L	2170964	2171015	XBXL10_1g11382	X	+
Chr3L	2202915	2202966	XBXL10_1g11383	X	+
Chr3L	2303327	2303378	XBXL10_1g11387	X	+
Chr3L	2330604	2330655	XBXL10_1g11388	X	+
Chr3L	2376359	2376410	XBXL10_1g11391	X	+
Chr3L	2410555	2410606	XBXL10_1g11392	X	+
Chr3L	2431562	2431613	XBXL10_1g11393	X	+
Chr3L	2439625	2439676	XBXL10_1g11394	X	+
Chr3L	2480259	2480310	XBXL10_1g11396	X	+
Chr3L	2483239	2483290	XBXL10_1g11397	X	+
Chr3L	2505848	2505899	XBXL10_1g11398	X	+
Chr3L	2516652	2516703	XBXL10_1g11399	.	+
Chr1L	72839833	72839884	XBXL10_1g1140	X	+
Chr3L	2523595	2523646	XBXL10_1g11400	.	+
Chr3L	2716385	2716436	XBXL10_1g11408	.	+
Chr3L	2841307	2841358	XBXL10_1g11409	.	+
Chr3L	3064675	3064726	XBXL10_1g11412	.	+
Chr3L	3084442	3084493	XBXL10_1g11414	X	+
Chr3L	3257805	3257856	XBXL10_1g11427	X	+
Chr3L	3315714	3315765	XBXL10_1g11429	X	+
Chr1L	72893720	72893771	XBXL10_1g1143	.	+
Chr3L	3543728	3543779	XBXL10_1g11432	X	+
Chr3L	3675779	3675830	XBXL10_1g11437	X	+
Chr3L	3793794	3793845	XBXL10_1g11439	X	+
Chr1L	72926565	72926616	XBXL10_1g1144	.	+
Chr3L	3925819	3925870	XBXL10_1g11440	X	+
Chr3L	3953342	3953393	XBXL10_1g11443	X	+
Chr3L	3968164	3968215	XBXL10_1g11444	X	+
Chr3L	4262976	4263027	XBXL10_1g11449	X	+
Chr3L	4275727	4275778	XBXL10_1g11450	X	+
Chr3L	4350067	4350118	XBXL10_1g11451	X	+
Chr3L	4374390	4374441	XBXL10_1g11453	X	+
Chr3L	4475238	4475289	XBXL10_1g11456	X	+
Chr3L	4507331	4507382	XBXL10_1g11459	X	+
Chr3L	4569664	4569715	XBXL10_1g11461	X	+
Chr3L	4593790	4593841	XBXL10_1g11462	X	+
Chr3L	4615183	4615234	XBXL10_1g11463	X	+
Chr3L	4699368	4699419	XBXL10_1g11466	X	+
Chr3L	4758269	4758320	XBXL10_1g11468	.	+
Chr3L	4761756	4761807	XBXL10_1g11469	X	+
Chr1L	73589866	73589917	XBXL10_1g1147	X	+
Chr3L	4764526	4764577	XBXL10_1g11470	X	+
Chr3L	4772062	4772113	XBXL10_1g11471	X	+
Chr3L	4775920	4775971	XBXL10_1g11472	X	+
Chr3L	4824880	4824931	XBXL10_1g11474	X	+
Chr3L	4900005	4900056	XBXL10_1g11476	X	+
Chr3L	4905372	4905423	XBXL10_1g11477	.	+
Chr3L	4954032	4954083	XBXL10_1g11480	X	+
Chr3L	5237055	5237106	XBXL10_1g11483	.	+
Chr3L	5444778	5444829	XBXL10_1g11485	X	+
Chr3L	5643799	5643850	XBXL10_1g11490	X	+
Chr3L	5708011	5708062	XBXL10_1g11492	X	+
Chr3L	5849168	5849219	XBXL10_1g11493	X	+
Chr3L	5857890	5857941	XBXL10_1g11494	X	+
Chr3L	5902843	5902894	XBXL10_1g11496	.	+
Chr3L	5917461	5917512	XBXL10_1g11497	X	+
Chr1L	4454935	4454986	XBXL10_1g115	.	+
Chr1L	74354388	74354439	XBXL10_1g1150	X	+
Chr3L	6050603	6050654	XBXL10_1g11501	.	+
Chr3L	6172361	6172412	XBXL10_1g11504	X	+
Chr3L	6282086	6282137	XBXL10_1g11505	X	+
Chr3L	6406360	6406411	XBXL10_1g11506	.	+
Chr3L	6590489	6590540	XBXL10_1g11509	X	+
Chr1L	74462928	74462979	XBXL10_1g1151	X	+
Chr3L	6612858	6612909	XBXL10_1g11511	X	+
Chr1L	74464029	74464080	XBXL10_1g1152	X	+
Chr3L	6797220	6797271	XBXL10_1g11521	X	+
Chr3L	6797812	6797863	XBXL10_1g11522	X	+
Chr3L	6888412	6888463	XBXL10_1g11524	.	+
Chr3L	7022912	7022963	XBXL10_1g11527	X	+
Chr3L	7057897	7057948	XBXL10_1g11528	X	+
Chr3L	7062193	7062244	XBXL10_1g11529	X	+
Chr1L	74464813	74464864	XBXL10_1g1153	X	+
Chr3L	7065992	7066043	XBXL10_1g11530	X	+
Chr3L	7090523	7090574	XBXL10_1g11534	.	+
Chr3L	7137714	7137765	XBXL10_1g11537	X	+
Chr3L	7173514	7173565	XBXL10_1g11538	.	+
Chr3L	7206088	7206139	XBXL10_1g11539	.	+
Chr3L	7221380	7221431	XBXL10_1g11540	.	+
Chr3L	7376686	7376737	XBXL10_1g11544	X	+
Chr3L	7426561	7426612	XBXL10_1g11546	X	+
Chr3L	7442431	7442482	XBXL10_1g11547	.	+
Chr3L	7456061	7456112	XBXL10_1g11549	X	+
Chr1L	74623539	74623590	XBXL10_1g1155	.	+
Chr3L	7467983	7468034	XBXL10_1g11550	X	+
Chr3L	7503984	7504035	XBXL10_1g11552	X	+
Chr3L	7573453	7573504	XBXL10_1g11555	X	+
Chr3L	7810232	7810283	XBXL10_1g11559	X	+
Chr3L	7928077	7928128	XBXL10_1g11565	X	+
Chr3L	7990566	7990617	XBXL10_1g11569	X	+
Chr1L	74701481	74701532	XBXL10_1g1157	.	+
Chr3L	8059291	8059342	XBXL10_1g11572	X	+
Chr3L	8104693	8104744	XBXL10_1g11574	X	+
Chr1L	74852657	74852708	XBXL10_1g1158	.	+
Chr3L	8301105	8301156	XBXL10_1g11580	.	+
Chr3L	8418883	8418934	XBXL10_1g11582	.	+
Chr3L	8773373	8773424	XBXL10_1g11586	X	+
Chr3L	8905556	8905607	XBXL10_1g11587	X	+
Chr3L	8916253	8916304	XBXL10_1g11588	X	+
Chr3L	9007572	9007623	XBXL10_1g11589	X	+
Chr1L	74896959	74897010	XBXL10_1g1159	X	+
Chr3L	9060424	9060475	XBXL10_1g11592	X	+
Chr3L	9102969	9103020	XBXL10_1g11595	X	+
Chr3L	9216259	9216310	XBXL10_1g11598	X	+
Chr3L	9254744	9254795	XBXL10_1g11599	X	+
Chr1L	4482746	4482797	XBXL10_1g116	.	+
Chr3L	9267812	9267863	XBXL10_1g11600	X	+
Chr3L	9350194	9350245	XBXL10_1g11603	X	+
Chr3L	9362950	9363001	XBXL10_1g11604	X	+
Chr3L	9452367	9452418	XBXL10_1g11608	X	+
Chr3L	9573222	9573273	XBXL10_1g11610	X	+
Chr3L	9639083	9639134	XBXL10_1g11612	X	+
Chr3L	9927257	9927308	XBXL10_1g11618	X	+
Chr3L	10009730	10009781	XBXL10_1g11619	X	+
Chr1L	75032971	75033022	XBXL10_1g1162	.	+
Chr3L	10059045	10059096	XBXL10_1g11621	X	+
Chr3L	10088950	10089001	XBXL10_1g11622	X	+
Chr3L	10367051	10367102	XBXL10_1g11632	X	+
Chr3L	10394150	10394201	XBXL10_1g11634	X	+
Chr3L	10414983	10415034	XBXL10_1g11636	X	+
Chr3L	10488323	10488374	XBXL10_1g11638	X	+
Chr3L	10510508	10510559	XBXL10_1g11639	X	+
Chr3L	10539175	10539226	XBXL10_1g11641	X	+
Chr3L	10546653	10546704	XBXL10_1g11642	X	+
Chr3L	10656593	10656644	XBXL10_1g11647	X	+
Chr3L	10771167	10771218	XBXL10_1g11650	X	+
Chr3L	11059241	11059292	XBXL10_1g11653	X	+
Chr3L	11461464	11461515	XBXL10_1g11657	X	+
Chr3L	11462413	11462464	XBXL10_1g11659	X	+
Chr3L	11463361	11463412	XBXL10_1g11661	X	+
Chr3L	11464308	11464359	XBXL10_1g11663	X	+
Chr3L	11465256	11465307	XBXL10_1g11665	X	+
Chr3L	11466204	11466255	XBXL10_1g11667	X	+
Chr3L	11467151	11467202	XBXL10_1g11669	X	+
Chr3L	11468099	11468150	XBXL10_1g11671	X	+
Chr3L	11469046	11469097	XBXL10_1g11673	X	+
Chr3L	11469991	11470042	XBXL10_1g11675	X	+
Chr3L	11470938	11470989	XBXL10_1g11677	X	+
Chr3L	11471886	11471937	XBXL10_1g11679	X	+
Chr3L	11472834	11472885	XBXL10_1g11681	X	+
Chr3L	11473780	11473831	XBXL10_1g11683	X	+
Chr3L	11474727	11474778	XBXL10_1g11685	X	+
Chr3L	11475674	11475725	XBXL10_1g11687	X	+
Chr3L	11476622	11476673	XBXL10_1g11689	X	+
Chr1L	75656060	75656111	XBXL10_1g1169	X	+
Chr3L	11477569	11477620	XBXL10_1g11691	X	+
Chr3L	11478518	11478569	XBXL10_1g11693	X	+
Chr3L	11489636	11489687	XBXL10_1g11695	X	+
Chr3L	11490585	11490636	XBXL10_1g11697	X	+
Chr3L	11491534	11491585	XBXL10_1g11699	X	+
Chr3L	11492482	11492533	XBXL10_1g11701	X	+
Chr3L	11493430	11493481	XBXL10_1g11703	X	+
Chr3L	11494379	11494430	XBXL10_1g11705	X	+
Chr3L	11495680	11495731	XBXL10_1g11708	X	+
Chr3L	11496628	11496679	XBXL10_1g11710	X	+
Chr3L	11497577	11497628	XBXL10_1g11712	X	+
Chr3L	11498524	11498575	XBXL10_1g11714	X	+
Chr3L	11499470	11499521	XBXL10_1g11716	X	+
Chr3L	11501954	11502005	XBXL10_1g11718	X	+
Chr3L	11695135	11695186	XBXL10_1g11720	X	+
Chr3L	11697599	11697650	XBXL10_1g11721	X	+
Chr3L	11781672	11781723	XBXL10_1g11722	X	+
Chr3L	11853914	11853965	XBXL10_1g11727	X	+
Chr3L	11891999	11892050	XBXL10_1g11728	X	+
Chr1L	76014606	76014657	XBXL10_1g1173	X	+
Chr3L	11963045	11963096	XBXL10_1g11730	X	+
Chr3L	11963597	11963648	XBXL10_1g11731	X	+
Chr3L	11999691	11999742	XBXL10_1g11732	X	+
Chr3L	12039184	12039235	XBXL10_1g11733	X	+
Chr3L	12309223	12309274	XBXL10_1g11737	X	+
Chr3L	12503171	12503222	XBXL10_1g11739	X	+
Chr1L	76181489	76181540	XBXL10_1g1174	.	+
Chr3L	12547702	12547753	XBXL10_1g11740	X	+
Chr3L	12558371	12558422	XBXL10_1g11741	X	+
Chr3L	12661867	12661918	XBXL10_1g11746	X	+
Chr3L	12733980	12734031	XBXL10_1g11748	X	+
Chr3L	12893924	12893975	XBXL10_1g11749	X	+
Chr1L	76452826	76452877	XBXL10_1g1175	.	+
Chr3L	13010948	13010999	XBXL10_1g11751	X	+
Chr3L	13057113	13057164	XBXL10_1g11752	X	+
Chr3L	13096613	13096664	XBXL10_1g11755	X	+
Chr3L	13115929	13115980	XBXL10_1g11757	X	+
Chr3L	13188448	13188499	XBXL10_1g11761	X	+
Chr3L	13285894	13285945	XBXL10_1g11764	X	+
Chr3L	13324331	13324382	XBXL10_1g11766	X	+
Chr3L	13375132	13375183	XBXL10_1g11767	.	+
Chr1L	76506225	76506276	XBXL10_1g1177	X	+
Chr3L	13487381	13487432	XBXL10_1g11772	X	+
Chr3L	13499987	13500038	XBXL10_1g11774	X	+
Chr3L	13556406	13556457	XBXL10_1g11775	.	+
Chr3L	13595800	13595851	XBXL10_1g11777	X	+
Chr3L	13680140	13680191	XBXL10_1g11779	X	+
Chr3L	13870451	13870502	XBXL10_1g11781	X	+
Chr3L	14192798	14192849	XBXL10_1g11784	X	+
Chr3L	14581001	14581052	XBXL10_1g11787	X	+
Chr3L	14664883	14664934	XBXL10_1g11790	X	+
Chr3L	14721312	14721363	XBXL10_1g11791	X	+
Chr3L	14747206	14747257	XBXL10_1g11792	X	+
Chr3L	14757001	14757052	XBXL10_1g11793	X	+
Chr3L	14780228	14780279	XBXL10_1g11794	X	+
Chr3L	14792081	14792132	XBXL10_1g11795	X	+
Chr3L	14870789	14870840	XBXL10_1g11797	X	+
Chr3L	14963819	14963870	XBXL10_1g11798	X	+
Chr3L	14996831	14996882	XBXL10_1g11799	X	+
Chr3L	15080758	15080809	XBXL10_1g11801	X	+
Chr3L	15179108	15179159	XBXL10_1g11802	X	+
Chr3L	15259073	15259124	XBXL10_1g11805	X	+
Chr1L	76838709	76838760	XBXL10_1g1181	X	+
Chr3L	15482294	15482345	XBXL10_1g11827	X	+
Chr3L	15501857	15501908	XBXL10_1g11828	X	+
Chr3L	15504110	15504161	XBXL10_1g11829	X	+
Chr1L	76918952	76919003	XBXL10_1g1183	X	+
Chr3L	15512703	15512754	XBXL10_1g11830	X	+
Chr3L	15614919	15614970	XBXL10_1g11831	X	+
Chr3L	15626316	15626367	XBXL10_1g11832	X	+
Chr3L	15644199	15644250	XBXL10_1g11833	X	+
Chr3L	15773902	15773953	XBXL10_1g11834	X	+
Chr3L	15814629	15814680	XBXL10_1g11836	X	+
Chr3L	15821106	15821157	XBXL10_1g11837	X	+
Chr3L	16019610	16019661	XBXL10_1g11840	X	+
Chr3L	16024018	16024069	XBXL10_1g11841	X	+
Chr3L	16027865	16027916	XBXL10_1g11842	X	+
Chr3L	16040471	16040522	XBXL10_1g11843	X	+
Chr3L	16045908	16045959	XBXL10_1g11844	X	+
Chr3L	16049968	16050019	XBXL10_1g11845	X	+
Chr3L	16098014	16098065	XBXL10_1g11846	X	+
Chr3L	16098610	16098661	XBXL10_1g11847	X	+
Chr3L	16126807	16126858	XBXL10_1g11849	X	+
Chr3L	16134938	16134989	XBXL10_1g11850	X	+
Chr3L	16400297	16400348	XBXL10_1g11858	X	+
Chr3L	16434909	16434960	XBXL10_1g11859	X	+
Chr1L	77231389	77231440	XBXL10_1g1186	.	+
Chr3L	16489728	16489779	XBXL10_1g11861	X	+
Chr3L	16542027	16542078	XBXL10_1g11863	.	+
Chr1L	77454898	77454949	XBXL10_1g1187	.	+
Chr3L	17003619	17003670	XBXL10_1g11872	X	+
Chr3L	17039710	17039761	XBXL10_1g11873	X	+
Chr3L	17063034	17063085	XBXL10_1g11874	X	+
Chr3L	17108011	17108062	XBXL10_1g11875	X	+
Chr3L	17241980	17242031	XBXL10_1g11879	X	+
Chr1L	77540906	77540957	XBXL10_1g1188	.	+
Chr3L	17252570	17252621	XBXL10_1g11880	X	+
Chr3L	17268855	17268906	XBXL10_1g11881	X	+
Chr3L	17300331	17300382	XBXL10_1g11883	X	+
Chr3L	17346719	17346770	XBXL10_1g11884	X	+
Chr3L	17480146	17480197	XBXL10_1g11886	.	+
Chr3L	17536752	17536803	XBXL10_1g11888	.	+
Chr1L	77628774	77628825	XBXL10_1g1189	.	+
Chr3L	17671230	17671281	XBXL10_1g11891	.	+
Chr3L	17721146	17721197	XBXL10_1g11892	X	+
Chr3L	17869988	17870039	XBXL10_1g11895	.	+
Chr3L	18550865	18550916	XBXL10_1g11899	X	+
Chr1L	77760827	77760878	XBXL10_1g1190	.	+
Chr3L	18569777	18569828	XBXL10_1g11900	X	+
Chr3L	18769018	18769069	XBXL10_1g11902	X	+
Chr3L	18953031	18953082	XBXL10_1g11904	X	+
Chr3L	19263498	19263549	XBXL10_1g11906	.	+
Chr1L	77811774	77811825	XBXL10_1g1191	X	+
Chr3L	19576791	19576842	XBXL10_1g11912	X	+
Chr3L	19965076	19965127	XBXL10_1g11913	.	+
Chr3L	20620157	20620208	XBXL10_1g11916	.	+
Chr3L	20754496	20754547	XBXL10_1g11918	X	+
Chr3L	20841524	20841575	XBXL10_1g11919	.	+
Chr3L	20951421	20951472	XBXL10_1g11921	.	+
Chr3L	20999103	20999154	XBXL10_1g11922	X	+
Chr3L	21088582	21088633	XBXL10_1g11924	X	+
Chr3L	21332633	21332684	XBXL10_1g11929	X	+
Chr3L	21410381	21410432	XBXL10_1g11931	X	+
Chr3L	21543300	21543351	XBXL10_1g11935	.	+
Chr3L	21578681	21578732	XBXL10_1g11936	.	+
Chr3L	21611672	21611723	XBXL10_1g11937	X	+
Chr1L	77950868	77950919	XBXL10_1g1194	X	+
Chr3L	21953064	21953115	XBXL10_1g11942	X	+
Chr3L	22336573	22336624	XBXL10_1g11946	X	+
Chr3L	22361089	22361140	XBXL10_1g11947	X	+
Chr3L	22364432	22364483	XBXL10_1g11949	.	+
Chr1L	77971379	77971430	XBXL10_1g1195	.	+
Chr3L	22463250	22463301	XBXL10_1g11950	.	+
Chr3L	22479596	22479647	XBXL10_1g11952	X	+
Chr3L	22656118	22656169	XBXL10_1g11954	X	+
Chr3L	22813438	22813489	XBXL10_1g11955	.	+
Chr3L	22839645	22839696	XBXL10_1g11956	X	+
Chr3L	23013117	23013168	XBXL10_1g11959	X	+
Chr3L	23401558	23401609	XBXL10_1g11960	X	+
Chr3L	23538802	23538853	XBXL10_1g11964	X	+
Chr1L	78036815	78036866	XBXL10_1g1197	X	+
Chr3L	23719759	23719810	XBXL10_1g11970	.	+
Chr3L	23901867	23901918	XBXL10_1g11977	X	+
Chr3L	23926719	23926770	XBXL10_1g11978	X	+
Chr1L	78057859	78057910	XBXL10_1g1198	X	+
Chr3L	24046029	24046080	XBXL10_1g11981	X	+
Chr3L	24073532	24073583	XBXL10_1g11984	X	+
Chr3L	24149426	24149477	XBXL10_1g11988	X	+
Chr3L	24204179	24204230	XBXL10_1g11989	.	+
Chr3L	24258483	24258534	XBXL10_1g11992	X	+
Chr3L	24272161	24272212	XBXL10_1g11993	X	+
Chr3L	24336611	24336662	XBXL10_1g11995	.	+
Chr3L	24382119	24382170	XBXL10_1g11996	.	+
Chr3L	24434557	24434608	XBXL10_1g11997	.	+
Chr3L	24469838	24469889	XBXL10_1g11998	.	+
Chr3L	24512682	24512733	XBXL10_1g11999	.	+
Chr1L	78225764	78225815	XBXL10_1g1200	.	+
Chr3L	24584654	24584705	XBXL10_1g12001	X	+
Chr3L	24586182	24586233	XBXL10_1g12002	X	+
Chr3L	24622082	24622133	XBXL10_1g12003	X	+
Chr3L	24623584	24623635	XBXL10_1g12004	X	+
Chr3L	24624228	24624279	XBXL10_1g12005	X	+
Chr3L	24655702	24655753	XBXL10_1g12006	X	+
Chr3L	24658642	24658693	XBXL10_1g12008	X	+
Chr1L	78276891	78276942	XBXL10_1g1201	X	+
Chr3L	24689092	24689143	XBXL10_1g12011	X	+
Chr3L	24692223	24692274	XBXL10_1g12012	X	+
Chr3L	24718454	24718505	XBXL10_1g12013	X	+
Chr3L	24722399	24722450	XBXL10_1g12015	X	+
Chr3L	24764271	24764322	XBXL10_1g12016	X	+
Chr3L	24767139	24767190	XBXL10_1g12017	X	+
Chr3L	24871674	24871725	XBXL10_1g12019	X	+
Chr3L	24897544	24897595	XBXL10_1g12020	X	+
Chr3L	24901396	24901447	XBXL10_1g12021	X	+
Chr3L	24961325	24961376	XBXL10_1g12022	X	+
Chr3L	24965157	24965208	XBXL10_1g12024	X	+
Chr3L	25044702	25044753	XBXL10_1g12026	.	+
Chr3L	25052359	25052410	XBXL10_1g12028	.	+
Chr1L	78616623	78616674	XBXL10_1g1203	X	+
Chr3L	25124628	25124679	XBXL10_1g12034	.	+
Chr3L	25127517	25127568	XBXL10_1g12036	.	+
Chr3L	25251285	25251336	XBXL10_1g12037	.	+
Chr1L	78885767	78885818	XBXL10_1g1204	.	+
Chr3L	25705885	25705936	XBXL10_1g12040	X	+
Chr3L	25811257	25811308	XBXL10_1g12042	X	+
Chr3L	25868947	25868998	XBXL10_1g12043	X	+
Chr3L	26028509	26028560	XBXL10_1g12044	X	+
Chr3L	26137900	26137951	XBXL10_1g12045	.	+
Chr3L	26628601	26628652	XBXL10_1g12048	X	+
Chr3L	26876251	26876302	XBXL10_1g12053	.	+
Chr3L	26964994	26965045	XBXL10_1g12054	.	+
Chr3L	27016535	27016586	XBXL10_1g12056	.	+
Chr3L	27094528	27094579	XBXL10_1g12058	X	+
Chr1L	78941529	78941580	XBXL10_1g1206	X	+
Chr3L	27244414	27244465	XBXL10_1g12061	X	+
Chr3L	27349150	27349201	XBXL10_1g12066	X	+
Chr3L	27777461	27777512	XBXL10_1g12069	X	+
Chr3L	27910470	27910521	XBXL10_1g12073	X	+
Chr3L	28037006	28037057	XBXL10_1g12076	X	+
Chr3L	28067344	28067395	XBXL10_1g12077	X	+
Chr3L	28102361	28102412	XBXL10_1g12079	X	+
Chr1L	78977820	78977871	XBXL10_1g1208	X	+
Chr3L	28173081	28173132	XBXL10_1g12081	X	+
Chr3L	28218380	28218431	XBXL10_1g12083	X	+
Chr3L	28327698	28327749	XBXL10_1g12084	.	+
Chr3L	28366675	28366726	XBXL10_1g12085	X	+
Chr3L	28436623	28436674	XBXL10_1g12087	X	+
Chr3L	28621530	28621581	XBXL10_1g12089	X	+
Chr1L	78997150	78997201	XBXL10_1g1209	.	+
Chr3L	28809713	28809764	XBXL10_1g12091	X	+
Chr3L	28875721	28875772	XBXL10_1g12092	X	+
Chr3L	28877532	28877583	XBXL10_1g12093	X	+
Chr3L	28900354	28900405	XBXL10_1g12094	X	+
Chr3L	28956010	28956061	XBXL10_1g12095	X	+
Chr3L	28983089	28983140	XBXL10_1g12096	X	+
Chr3L	28994496	28994547	XBXL10_1g12097	X	+
Chr1L	4738978	4739029	XBXL10_1g121	X	+
Chr3L	29596990	29597041	XBXL10_1g12100	X	+
Chr3L	30016631	30016682	XBXL10_1g12103	X	+
Chr3L	30223777	30223828	XBXL10_1g12105	X	+
Chr3L	30292246	30292297	XBXL10_1g12107	X	+
Chr3L	30303506	30303557	XBXL10_1g12108	X	+
Chr3L	30328115	30328166	XBXL10_1g12109	.	+
Chr3L	30348364	30348415	XBXL10_1g12110	.	+
Chr3L	30406168	30406219	XBXL10_1g12112	X	+
Chr3L	30468653	30468704	XBXL10_1g12113	X	+
Chr3L	30605016	30605067	XBXL10_1g12114	X	+
Chr3L	30880615	30880666	XBXL10_1g12116	.	+
Chr3L	31200160	31200211	XBXL10_1g12119	X	+
Chr1L	79136989	79137040	XBXL10_1g1212	.	+
Chr3L	31371289	31371340	XBXL10_1g12120	X	+
Chr3L	32248653	32248704	XBXL10_1g12121	.	+
Chr3L	32264488	32264539	XBXL10_1g12123	.	+
Chr3L	32498389	32498440	XBXL10_1g12127	X	+
Chr3L	32530414	32530465	XBXL10_1g12129	X	+
Chr1L	79186306	79186357	XBXL10_1g1213	.	+
Chr3L	32672737	32672788	XBXL10_1g12131	X	+
Chr3L	32699409	32699460	XBXL10_1g12133	X	+
Chr3L	32768279	32768330	XBXL10_1g12134	X	+
Chr3L	32779970	32780021	XBXL10_1g12135	X	+
Chr3L	32810265	32810316	XBXL10_1g12136	X	+
Chr3L	32844182	32844233	XBXL10_1g12137	X	+
Chr3L	32894301	32894352	XBXL10_1g12139	X	+
Chr1L	79220712	79220763	XBXL10_1g1214	.	+
Chr3L	33010309	33010360	XBXL10_1g12141	X	+
Chr3L	33124042	33124093	XBXL10_1g12142	.	+
Chr3L	33139448	33139499	XBXL10_1g12143	.	+
Chr3L	33145902	33145953	XBXL10_1g12144	.	+
Chr3L	33160087	33160138	XBXL10_1g12145	.	+
Chr3L	33179332	33179383	XBXL10_1g12146	.	+
Chr3L	33200107	33200158	XBXL10_1g12147	.	+
Chr3L	33337806	33337857	XBXL10_1g12148	.	+
Chr3L	33353707	33353758	XBXL10_1g12149	.	+
Chr1L	79240529	79240580	XBXL10_1g1215	.	+
Chr3L	33371833	33371884	XBXL10_1g12150	.	+
Chr3L	33840188	33840239	XBXL10_1g12153	X	+
Chr1L	79321136	79321187	XBXL10_1g1216	.	+
Chr3L	34319372	34319423	XBXL10_1g12160	.	+
Chr3L	34739438	34739489	XBXL10_1g12163	.	+
Chr3L	35643972	35644023	XBXL10_1g12165	.	+
Chr3L	36055476	36055527	XBXL10_1g12166	X	+
Chr3L	36376434	36376485	XBXL10_1g12167	X	+
Chr3L	37332430	37332481	XBXL10_1g12168	X	+
Chr3L	37388345	37388396	XBXL10_1g12169	X	+
Chr1L	79348023	79348074	XBXL10_1g1217	.	+
Chr3L	37412299	37412350	XBXL10_1g12170	X	+
Chr3L	37565707	37565758	XBXL10_1g12174	X	+
Chr3L	37680943	37680994	XBXL10_1g12175	.	+
Chr3L	37715687	37715738	XBXL10_1g12176	X	+
Chr3L	37793723	37793774	XBXL10_1g12179	X	+
Chr1L	79373804	79373855	XBXL10_1g1218	.	+
Chr3L	37921101	37921152	XBXL10_1g12180	.	+
Chr3L	37954777	37954828	XBXL10_1g12181	X	+
Chr3L	38095929	38095980	XBXL10_1g12185	X	+
Chr3L	38125058	38125109	XBXL10_1g12186	X	+
Chr3L	38265857	38265908	XBXL10_1g12189	X	+
Chr3L	38284685	38284736	XBXL10_1g12190	X	+
Chr3L	38351666	38351717	XBXL10_1g12191	X	+
Chr3L	38388960	38389011	XBXL10_1g12192	X	+
Chr3L	38498511	38498562	XBXL10_1g12194	X	+
Chr3L	38777157	38777208	XBXL10_1g12197	.	+
Chr3L	38895567	38895618	XBXL10_1g12198	.	+
Chr1L	4739515	4739566	XBXL10_1g122	X	+
Chr1L	79436571	79436622	XBXL10_1g1220	X	+
Chr3L	39258093	39258144	XBXL10_1g12202	.	+
Chr3L	39550606	39550657	XBXL10_1g12204	X	+
Chr3L	39965278	39965329	XBXL10_1g12205	X	+
Chr3L	40007295	40007346	XBXL10_1g12206	X	+
Chr3L	40050491	40050542	XBXL10_1g12208	.	+
Chr3L	40334193	40334244	XBXL10_1g12210	.	+
Chr3L	40398733	40398784	XBXL10_1g12218	X	+
Chr1L	79513376	79513427	XBXL10_1g1222	X	+
Chr3L	40513241	40513292	XBXL10_1g12221	X	+
Chr3L	40747881	40747932	XBXL10_1g12226	X	+
Chr1L	79523851	79523902	XBXL10_1g1223	X	+
Chr3L	40801867	40801918	XBXL10_1g12230	X	+
Chr3L	43207033	43207084	XBXL10_1g12236	.	+
Chr3L	43703555	43703606	XBXL10_1g12242	.	+
Chr3L	43877821	43877872	XBXL10_1g12244	X	+
Chr3L	44057250	44057301	XBXL10_1g12246	X	+
Chr3L	44156673	44156724	XBXL10_1g12247	.	+
Chr3L	44432650	44432701	XBXL10_1g12248	X	+
Chr3L	44741102	44741153	XBXL10_1g12249	X	+
Chr3L	44944382	44944433	XBXL10_1g12250	.	+
Chr3L	45094712	45094763	XBXL10_1g12252	X	+
Chr3L	45094713	45094764	XBXL10_1g12253	X	+
Chr3L	45163697	45163748	XBXL10_1g12256	.	+
Chr3L	45220144	45220195	XBXL10_1g12258	X	+
Chr3L	45238796	45238847	XBXL10_1g12259	X	+
Chr1L	79699510	79699561	XBXL10_1g1226	.	+
Chr1L	80554259	80554310	XBXL10_1g1227	.	+
Chr3L	45389047	45389098	XBXL10_1g12273	X	+
Chr3L	45482769	45482820	XBXL10_1g12275	X	+
Chr3L	45580875	45580926	XBXL10_1g12277	X	+
Chr3L	45613237	45613288	XBXL10_1g12278	X	+
Chr3L	45720296	45720347	XBXL10_1g12283	X	+
Chr3L	46358197	46358248	XBXL10_1g12285	.	+
Chr3L	46419118	46419169	XBXL10_1g12286	.	+
Chr3L	46478836	46478887	XBXL10_1g12287	.	+
Chr3L	46485784	46485835	XBXL10_1g12288	.	+
Chr3L	46523126	46523177	XBXL10_1g12289	.	+
Chr3L	47267138	47267189	XBXL10_1g12292	X	+
Chr3L	47311057	47311108	XBXL10_1g12293	X	+
Chr3L	47439190	47439241	XBXL10_1g12295	X	+
Chr3L	47529661	47529712	XBXL10_1g12296	.	+
Chr3L	47574639	47574690	XBXL10_1g12297	X	+
Chr3L	47895310	47895361	XBXL10_1g12300	X	+
Chr3L	47895568	47895619	XBXL10_1g12301	X	+
Chr3L	47896919	47896970	XBXL10_1g12302	X	+
Chr3L	47897557	47897608	XBXL10_1g12303	X	+
Chr3L	47898805	47898856	XBXL10_1g12304	X	+
Chr3L	47899290	47899341	XBXL10_1g12305	X	+
Chr3L	47899549	47899600	XBXL10_1g12306	X	+
Chr3L	47900562	47900613	XBXL10_1g12307	X	+
Chr3L	47908464	47908515	XBXL10_1g12308	X	+
Chr3L	48028004	48028055	XBXL10_1g12309	X	+
Chr1L	81609441	81609492	XBXL10_1g1231	X	+
Chr3L	48316207	48316258	XBXL10_1g12314	X	+
Chr3L	48458608	48458659	XBXL10_1g12315	.	+
Chr3L	48933895	48933946	XBXL10_1g12317	X	+
Chr3L	49012612	49012663	XBXL10_1g12318	X	+
Chr3L	49086562	49086613	XBXL10_1g12319	X	+
Chr3L	49097756	49097807	XBXL10_1g12320	X	+
Chr3L	49270350	49270401	XBXL10_1g12322	.	+
Chr3L	49543669	49543720	XBXL10_1g12324	X	+
Chr3L	49709086	49709137	XBXL10_1g12327	.	+
Chr3L	50889266	50889317	XBXL10_1g12331	.	+
Chr3L	50953888	50953939	XBXL10_1g12332	.	+
Chr3L	51097552	51097603	XBXL10_1g12337	.	+
Chr3L	51210102	51210153	XBXL10_1g12338	.	+
Chr3L	51405223	51405274	XBXL10_1g12340	X	+
Chr3L	51557649	51557700	XBXL10_1g12341	X	+
Chr3L	51709411	51709462	XBXL10_1g12343	.	+
Chr3L	51740121	51740172	XBXL10_1g12344	.	+
Chr3L	51775597	51775648	XBXL10_1g12345	.	+
Chr3L	51813555	51813606	XBXL10_1g12347	.	+
Chr3L	52106144	52106195	XBXL10_1g12350	.	+
Chr3L	52333875	52333926	XBXL10_1g12352	.	+
Chr3L	52551303	52551354	XBXL10_1g12353	.	+
Chr3L	52681817	52681868	XBXL10_1g12354	.	+
Chr3L	52851499	52851550	XBXL10_1g12356	X	+
Chr3L	52881953	52882004	XBXL10_1g12358	.	+
Chr3L	52938617	52938668	XBXL10_1g12359	X	+
Chr3L	52946424	52946475	XBXL10_1g12361	X	+
Chr3L	52995166	52995217	XBXL10_1g12364	.	+
Chr3L	53040972	53041023	XBXL10_1g12365	X	+
Chr3L	53073168	53073219	XBXL10_1g12366	.	+
Chr3L	53108976	53109027	XBXL10_1g12367	.	+
Chr3L	53131885	53131936	XBXL10_1g12368	.	+
Chr3L	53199367	53199418	XBXL10_1g12370	X	+
Chr3L	53251133	53251184	XBXL10_1g12371	X	+
Chr3L	53474725	53474776	XBXL10_1g12375	X	+
Chr3L	53555070	53555121	XBXL10_1g12378	X	+
Chr3L	53589485	53589536	XBXL10_1g12379	X	+
Chr3L	53610302	53610353	XBXL10_1g12381	X	+
Chr3L	53831356	53831407	XBXL10_1g12385	X	+
Chr3L	53970921	53970972	XBXL10_1g12387	X	+
Chr1L	83535942	83535993	XBXL10_1g1239	X	+
Chr3L	54632424	54632475	XBXL10_1g12391	.	+
Chr3L	54686910	54686961	XBXL10_1g12392	.	+
Chr3L	54808128	54808179	XBXL10_1g12394	X	+
Chr3L	54871397	54871448	XBXL10_1g12396	X	+
Chr3L	54926689	54926740	XBXL10_1g12399	X	+
Chr1L	83670501	83670552	XBXL10_1g1240	.	+
Chr3L	54936451	54936502	XBXL10_1g12400	X	+
Chr3L	54947800	54947851	XBXL10_1g12401	X	+
Chr3L	54969977	54970028	XBXL10_1g12402	X	+
Chr3L	55081068	55081119	XBXL10_1g12404	X	+
Chr3L	55161106	55161157	XBXL10_1g12407	X	+
Chr1L	83720371	83720422	XBXL10_1g1241	X	+
Chr3L	55304417	55304468	XBXL10_1g12411	X	+
Chr3L	55322141	55322192	XBXL10_1g12412	X	+
Chr3L	55360263	55360314	XBXL10_1g12413	X	+
Chr3L	55386307	55386358	XBXL10_1g12414	X	+
Chr3L	55427406	55427457	XBXL10_1g12415	X	+
Chr3L	55550957	55551008	XBXL10_1g12416	X	+
Chr1L	83762790	83762841	XBXL10_1g1242	.	+
Chr3L	55695761	55695812	XBXL10_1g12421	X	+
Chr3L	55732218	55732269	XBXL10_1g12422	X	+
Chr3L	55764198	55764249	XBXL10_1g12423	.	+
Chr3L	55818881	55818932	XBXL10_1g12424	X	+
Chr3L	55890518	55890569	XBXL10_1g12426	X	+
Chr1L	83864189	83864240	XBXL10_1g1243	X	+
Chr3L	56040036	56040087	XBXL10_1g12430	X	+
Chr3L	56081759	56081810	XBXL10_1g12431	X	+
Chr3L	56152425	56152476	XBXL10_1g12433	.	+
Chr3L	56192685	56192736	XBXL10_1g12434	.	+
Chr3L	56265324	56265375	XBXL10_1g12435	X	+
Chr3L	56352711	56352762	XBXL10_1g12437	.	+
Chr1L	84006688	84006739	XBXL10_1g1244	X	+
Chr3L	56456929	56456980	XBXL10_1g12440	X	+
Chr3L	56544836	56544887	XBXL10_1g12443	X	+
Chr3L	56604818	56604869	XBXL10_1g12444	X	+
Chr3L	56627974	56628025	XBXL10_1g12446	X	+
Chr3L	56663056	56663107	XBXL10_1g12447	X	+
Chr3L	56891655	56891706	XBXL10_1g12449	.	+
Chr1L	84028182	84028233	XBXL10_1g1245	.	+
Chr3L	57072740	57072791	XBXL10_1g12451	X	+
Chr3L	57115968	57116019	XBXL10_1g12452	.	+
Chr3L	57189668	57189719	XBXL10_1g12456	X	+
Chr3L	57240331	57240382	XBXL10_1g12458	X	+
Chr3L	57305633	57305684	XBXL10_1g12459	.	+
Chr1L	84037667	84037718	XBXL10_1g1246	X	+
Chr3L	57530675	57530726	XBXL10_1g12461	X	+
Chr3L	57539017	57539068	XBXL10_1g12462	X	+
Chr3L	57576049	57576100	XBXL10_1g12464	X	+
Chr3L	57658043	57658094	XBXL10_1g12466	X	+
Chr3L	57721108	57721159	XBXL10_1g12468	.	+
Chr3L	57745720	57745771	XBXL10_1g12469	.	+
Chr3L	57874651	57874702	XBXL10_1g12471	X	+
Chr3L	58048214	58048265	XBXL10_1g12472	X	+
Chr3L	58198013	58198064	XBXL10_1g12473	X	+
Chr3L	58771191	58771242	XBXL10_1g12475	X	+
Chr3L	58793306	58793357	XBXL10_1g12476	X	+
Chr3L	58798465	58798516	XBXL10_1g12477	X	+
Chr3L	58799447	58799498	XBXL10_1g12478	X	+
Chr3L	58855749	58855800	XBXL10_1g12479	X	+
Chr3L	59120196	59120247	XBXL10_1g12480	X	+
Chr3L	59186523	59186574	XBXL10_1g12481	X	+
Chr3L	59389972	59390023	XBXL10_1g12483	X	+
Chr3L	59405490	59405541	XBXL10_1g12484	X	+
Chr3L	59533101	59533152	XBXL10_1g12485	.	+
Chr3L	59676044	59676095	XBXL10_1g12486	.	+
Chr3L	59688118	59688169	XBXL10_1g12487	X	+
Chr3L	59778796	59778847	XBXL10_1g12489	X	+
Chr3L	60126144	60126195	XBXL10_1g12492	X	+
Chr3L	60368153	60368204	XBXL10_1g12493	X	+
Chr3L	60798274	60798325	XBXL10_1g12495	X	+
Chr3L	60900430	60900481	XBXL10_1g12496	X	+
Chr3L	61086781	61086832	XBXL10_1g12498	.	+
Chr1L	84152434	84152485	XBXL10_1g1250	X	+
Chr3L	61424089	61424140	XBXL10_1g12501	X	+
Chr3L	62551370	62551421	XBXL10_1g12511	.	+
Chr3L	62633437	62633488	XBXL10_1g12512	X	+
Chr3L	62637646	62637697	XBXL10_1g12513	X	+
Chr3L	62648109	62648160	XBXL10_1g12514	X	+
Chr3L	62676672	62676723	XBXL10_1g12515	X	+
Chr3L	62813502	62813553	XBXL10_1g12517	.	+
Chr3L	63015752	63015803	XBXL10_1g12520	X	+
Chr3L	63106441	63106492	XBXL10_1g12525	X	+
Chr3L	63136452	63136503	XBXL10_1g12527	X	+
Chr3L	63166163	63166214	XBXL10_1g12529	X	+
Chr1L	84339967	84340018	XBXL10_1g1253	X	+
Chr3L	63300727	63300778	XBXL10_1g12530	.	+
Chr3L	63580494	63580545	XBXL10_1g12535	X	+
Chr3L	63593236	63593287	XBXL10_1g12536	.	+
Chr3L	63662278	63662329	XBXL10_1g12538	X	+
Chr3L	63709368	63709419	XBXL10_1g12539	X	+
Chr1L	84386626	84386677	XBXL10_1g1254	X	+
Chr3L	63969444	63969495	XBXL10_1g12546	X	+
Chr3L	63991157	63991208	XBXL10_1g12548	X	+
Chr3L	64059002	64059053	XBXL10_1g12551	X	+
Chr3L	64212304	64212355	XBXL10_1g12556	X	+
Chr3L	64218245	64218296	XBXL10_1g12557	X	+
Chr3L	64222033	64222084	XBXL10_1g12558	X	+
Chr1L	84492515	84492566	XBXL10_1g1256	X	+
Chr3L	64276266	64276317	XBXL10_1g12560	X	+
Chr3L	64635602	64635653	XBXL10_1g12564	X	+
Chr3L	64707483	64707534	XBXL10_1g12565	X	+
Chr3L	64754953	64755004	XBXL10_1g12567	X	+
Chr3L	64938612	64938663	XBXL10_1g12570	X	+
Chr3L	64962663	64962714	XBXL10_1g12571	X	+
Chr3L	65247720	65247771	XBXL10_1g12573	X	+
Chr3L	65257057	65257108	XBXL10_1g12574	X	+
Chr3L	65295883	65295934	XBXL10_1g12575	X	+
Chr3L	65354523	65354574	XBXL10_1g12576	X	+
Chr3L	65551989	65552040	XBXL10_1g12581	X	+
Chr3L	65667288	65667339	XBXL10_1g12582	X	+
Chr3L	65706331	65706382	XBXL10_1g12583	X	+
Chr3L	65781564	65781615	XBXL10_1g12585	X	+
Chr3L	65882288	65882339	XBXL10_1g12588	X	+
Chr3L	65905653	65905704	XBXL10_1g12589	X	+
Chr1L	84589709	84589760	XBXL10_1g1259	.	+
Chr3L	65969509	65969560	XBXL10_1g12592	X	+
Chr3L	66005262	66005313	XBXL10_1g12593	.	+
Chr3L	66092141	66092192	XBXL10_1g12594	X	+
Chr3L	66171868	66171919	XBXL10_1g12595	.	+
Chr3L	66510145	66510196	XBXL10_1g12599	X	+
Chr1L	84599320	84599371	XBXL10_1g1260	.	+
Chr3L	66542583	66542634	XBXL10_1g12600	X	+
Chr3L	66733719	66733770	XBXL10_1g12602	X	+
Chr3L	66762020	66762071	XBXL10_1g12603	X	+
Chr3L	66785048	66785099	XBXL10_1g12604	X	+
Chr3L	66840643	66840694	XBXL10_1g12605	.	+
Chr3L	67234000	67234051	XBXL10_1g12606	.	+
Chr3L	67914004	67914055	XBXL10_1g12609	X	+
Chr3L	67923700	67923751	XBXL10_1g12610	X	+
Chr3L	68266140	68266191	XBXL10_1g12615	X	+
Chr3L	68475212	68475263	XBXL10_1g12618	X	+
Chr3L	68954306	68954357	XBXL10_1g12619	X	+
Chr3L	69561770	69561821	XBXL10_1g12623	.	+
Chr3L	69930744	69930795	XBXL10_1g12625	X	+
Chr3L	70038476	70038527	XBXL10_1g12627	X	+
Chr3L	70136164	70136215	XBXL10_1g12629	.	+
Chr1L	84653781	84653832	XBXL10_1g1263	.	+
Chr3L	70210264	70210315	XBXL10_1g12630	.	+
Chr3L	70293695	70293746	XBXL10_1g12631	.	+
Chr3L	70390900	70390951	XBXL10_1g12634	X	+
Chr3L	70393697	70393748	XBXL10_1g12635	X	+
Chr3L	70433076	70433127	XBXL10_1g12636	X	+
Chr3L	70484196	70484247	XBXL10_1g12637	X	+
Chr3L	70675906	70675957	XBXL10_1g12640	.	+
Chr3L	70738879	70738930	XBXL10_1g12641	.	+
Chr3L	70975183	70975234	XBXL10_1g12643	.	+
Chr3L	71003942	71003993	XBXL10_1g12644	X	+
Chr3L	71041411	71041462	XBXL10_1g12646	X	+
Chr3L	71083860	71083911	XBXL10_1g12647	.	+
Chr3L	71420004	71420055	XBXL10_1g12648	X	+
Chr3L	71500090	71500141	XBXL10_1g12650	X	+
Chr3L	71515614	71515665	XBXL10_1g12651	X	+
Chr3L	71530940	71530991	XBXL10_1g12652	X	+
Chr3L	72210600	72210651	XBXL10_1g12657	X	+
Chr3L	72229935	72229986	XBXL10_1g12659	X	+
Chr1L	84747647	84747698	XBXL10_1g1266	X	+
Chr3L	72758463	72758514	XBXL10_1g12661	X	+
Chr3L	73275612	73275663	XBXL10_1g12664	X	+
Chr3L	73367937	73367988	XBXL10_1g12665	X	+
Chr3L	73389585	73389636	XBXL10_1g12666	X	+
Chr3L	73458283	73458334	XBXL10_1g12668	X	+
Chr1L	84772340	84772391	XBXL10_1g1267	X	+
Chr3L	73878485	73878536	XBXL10_1g12672	.	+
Chr3L	74120374	74120425	XBXL10_1g12673	X	+
Chr3L	74422950	74423001	XBXL10_1g12674	.	+
Chr3L	74607802	74607853	XBXL10_1g12676	X	+
Chr3L	74694998	74695049	XBXL10_1g12677	X	+
Chr3L	74726212	74726263	XBXL10_1g12678	.	+
Chr3L	74839839	74839890	XBXL10_1g12679	X	+
Chr3L	74928965	74929016	XBXL10_1g12680	X	+
Chr3L	74956169	74956220	XBXL10_1g12681	X	+
Chr3L	75128154	75128205	XBXL10_1g12684	.	+
Chr3L	75318522	75318573	XBXL10_1g12686	X	+
Chr3L	75694758	75694809	XBXL10_1g12688	.	+
Chr3L	75979562	75979613	XBXL10_1g12690	X	+
Chr3L	76000287	76000338	XBXL10_1g12691	X	+
Chr3L	76023750	76023801	XBXL10_1g12692	X	+
Chr3L	76196636	76196687	XBXL10_1g12693	.	+
Chr3L	76309031	76309082	XBXL10_1g12695	X	+
Chr1L	4742812	4742863	XBXL10_1g127	X	+
Chr3L	76844531	76844582	XBXL10_1g12703	X	+
Chr3L	76868965	76869016	XBXL10_1g12704	X	+
Chr3L	76950261	76950312	XBXL10_1g12706	X	+
Chr3L	76970611	76970662	XBXL10_1g12707	X	+
Chr1L	84854769	84854820	XBXL10_1g1271	X	+
Chr3L	77925608	77925659	XBXL10_1g12713	X	+
Chr3L	78058886	78058937	XBXL10_1g12714	X	+
Chr3L	78121145	78121196	XBXL10_1g12715	X	+
Chr3L	78197198	78197249	XBXL10_1g12716	X	+
Chr3L	78244897	78244948	XBXL10_1g12718	X	+
Chr3L	78333598	78333649	XBXL10_1g12721	.	+
Chr3L	78369864	78369915	XBXL10_1g12723	X	+
Chr3L	78441846	78441897	XBXL10_1g12725	X	+
Chr3L	78520388	78520439	XBXL10_1g12726	.	+
Chr3L	78563189	78563240	XBXL10_1g12727	.	+
Chr3L	78801469	78801520	XBXL10_1g12728	X	+
Chr3L	78903348	78903399	XBXL10_1g12729	X	+
Chr1L	84995660	84995711	XBXL10_1g1273	.	+
Chr3L	78960574	78960625	XBXL10_1g12732	X	+
Chr3L	80482951	80483002	XBXL10_1g12737	X	+
Chr3L	80993761	80993812	XBXL10_1g12739	X	+
Chr3L	81173437	81173488	XBXL10_1g12743	X	+
Chr3L	81735032	81735083	XBXL10_1g12749	X	+
Chr3L	81853354	81853405	XBXL10_1g12752	X	+
Chr3L	81973846	81973897	XBXL10_1g12753	.	+
Chr3L	81986774	81986825	XBXL10_1g12754	.	+
Chr3L	82259759	82259810	XBXL10_1g12756	.	+
Chr3L	82336881	82336932	XBXL10_1g12758	.	+
Chr3L	82412477	82412528	XBXL10_1g12760	.	+
Chr3L	82464518	82464569	XBXL10_1g12761	.	+
Chr3L	82531317	82531368	XBXL10_1g12762	.	+
Chr3L	82742777	82742828	XBXL10_1g12769	X	+
Chr3L	82986624	82986675	XBXL10_1g12774	X	+
Chr3L	83087111	83087162	XBXL10_1g12776	X	+
Chr3L	83148981	83149032	XBXL10_1g12777	X	+
Chr3L	83164724	83164775	XBXL10_1g12778	X	+
Chr3L	83219893	83219944	XBXL10_1g12780	X	+
Chr3L	83319808	83319859	XBXL10_1g12781	X	+
Chr3L	83373085	83373136	XBXL10_1g12784	X	+
Chr3L	83632621	83632672	XBXL10_1g12787	.	+
Chr3L	83855704	83855755	XBXL10_1g12788	X	+
Chr3L	83913210	83913261	XBXL10_1g12790	X	+
Chr3L	83951153	83951204	XBXL10_1g12792	X	+
Chr3L	83982922	83982973	XBXL10_1g12794	X	+
Chr3L	84081581	84081632	XBXL10_1g12797	X	+
Chr1L	4743362	4743413	XBXL10_1g128	X	+
Chr3L	84202777	84202828	XBXL10_1g12800	X	+
Chr3L	84259485	84259536	XBXL10_1g12801	X	+
Chr3L	84294994	84295045	XBXL10_1g12803	X	+
Chr3L	84901954	84902005	XBXL10_1g12805	X	+
Chr3L	84949420	84949471	XBXL10_1g12806	X	+
Chr3L	84975486	84975537	XBXL10_1g12807	.	+
Chr3L	86883099	86883150	XBXL10_1g12815	X	+
Chr3L	87097504	87097555	XBXL10_1g12817	X	+
Chr3L	87166688	87166739	XBXL10_1g12821	X	+
Chr3L	87240151	87240202	XBXL10_1g12822	X	+
Chr3L	87477461	87477512	XBXL10_1g12823	X	+
Chr3L	87624990	87625041	XBXL10_1g12825	.	+
Chr3L	87680351	87680402	XBXL10_1g12826	X	+
Chr3L	87707312	87707363	XBXL10_1g12827	.	+
Chr3L	87726533	87726584	XBXL10_1g12828	X	+
Chr1L	85417519	85417570	XBXL10_1g1283	X	+
Chr3L	87783262	87783313	XBXL10_1g12830	X	+
Chr3L	87832691	87832742	XBXL10_1g12832	X	+
Chr3L	87864791	87864842	XBXL10_1g12833	X	+
Chr3L	88115713	88115764	XBXL10_1g12836	X	+
Chr3L	88159110	88159161	XBXL10_1g12838	X	+
Chr1L	85456021	85456072	XBXL10_1g1284	.	+
Chr3L	88311410	88311461	XBXL10_1g12842	X	+
Chr3L	89624262	89624313	XBXL10_1g12848	X	+
Chr3L	89701430	89701481	XBXL10_1g12850	X	+
Chr3L	89799301	89799352	XBXL10_1g12852	X	+
Chr3L	90034697	90034748	XBXL10_1g12854	X	+
Chr3L	90263126	90263177	XBXL10_1g12857	.	+
Chr3L	90334706	90334757	XBXL10_1g12859	X	+
Chr3L	90352829	90352880	XBXL10_1g12860	X	+
Chr3L	90428146	90428197	XBXL10_1g12862	X	+
Chr3L	90633079	90633130	XBXL10_1g12865	X	+
Chr3L	90795636	90795687	XBXL10_1g12867	X	+
Chr3L	91826035	91826086	XBXL10_1g12871	X	+
Chr3L	92071613	92071664	XBXL10_1g12872	X	+
Chr3L	92138486	92138537	XBXL10_1g12874	.	+
Chr3L	92171347	92171398	XBXL10_1g12875	.	+
Chr3L	92369455	92369506	XBXL10_1g12876	.	+
Chr3L	92408348	92408399	XBXL10_1g12877	.	+
Chr3L	92449757	92449808	XBXL10_1g12879	X	+
Chr1L	85566602	85566653	XBXL10_1g1288	X	+
Chr3L	92467594	92467645	XBXL10_1g12880	.	+
Chr3L	92484424	92484475	XBXL10_1g12881	X	+
Chr3L	92506716	92506767	XBXL10_1g12882	X	+
Chr3L	92529061	92529112	XBXL10_1g12883	X	+
Chr3L	92621513	92621564	XBXL10_1g12885	X	+
Chr3L	92651372	92651423	XBXL10_1g12886	X	+
Chr1L	85651500	85651551	XBXL10_1g1289	X	+
Chr3L	92982108	92982159	XBXL10_1g12892	.	+
Chr3L	93053776	93053827	XBXL10_1g12893	.	+
Chr3L	93114186	93114237	XBXL10_1g12894	X	+
Chr3L	93123865	93123916	XBXL10_1g12895	.	+
Chr3L	93253241	93253292	XBXL10_1g12899	X	+
Chr1L	85761870	85761921	XBXL10_1g1290	X	+
Chr3L	93311361	93311412	XBXL10_1g12901	X	+
Chr3L	93380369	93380420	XBXL10_1g12903	X	+
Chr3L	93438895	93438946	XBXL10_1g12905	X	+
Chr3L	93532807	93532858	XBXL10_1g12906	.	+
Chr3L	94351917	94351968	XBXL10_1g12908	X	+
Chr3L	94704971	94705022	XBXL10_1g12909	.	+
Chr3L	94778346	94778397	XBXL10_1g12910	X	+
Chr3L	94853391	94853442	XBXL10_1g12913	X	+
Chr3L	94856325	94856376	XBXL10_1g12914	X	+
Chr3L	94857911	94857962	XBXL10_1g12915	X	+
Chr3L	94875790	94875841	XBXL10_1g12917	X	+
Chr3L	94913116	94913167	XBXL10_1g12919	X	+
Chr1L	86467003	86467054	XBXL10_1g1292	.	+
Chr3L	95060880	95060931	XBXL10_1g12921	X	+
Chr3L	95081654	95081705	XBXL10_1g12922	X	+
Chr3L	95117336	95117387	XBXL10_1g12924	X	+
Chr3L	95138224	95138275	XBXL10_1g12925	.	+
Chr3L	95180720	95180771	XBXL10_1g12927	X	+
Chr3L	95198712	95198763	XBXL10_1g12929	X	+
Chr3L	95252410	95252461	XBXL10_1g12931	X	+
Chr3L	95504256	95504307	XBXL10_1g12935	X	+
Chr3L	95521689	95521740	XBXL10_1g12936	.	+
Chr1L	86735861	86735912	XBXL10_1g1294	.	+
Chr3L	95643666	95643717	XBXL10_1g12941	.	+
Chr3L	95673560	95673611	XBXL10_1g12942	.	+
Chr3L	95688456	95688507	XBXL10_1g12943	X	+
Chr3L	95703284	95703335	XBXL10_1g12944	X	+
Chr3L	95826596	95826647	XBXL10_1g12948	X	+
Chr3L	95855226	95855277	XBXL10_1g12949	X	+
Chr3L	95880875	95880926	XBXL10_1g12951	X	+
Chr3L	95949452	95949503	XBXL10_1g12953	.	+
Chr3L	96159883	96159934	XBXL10_1g12955	X	+
Chr3L	96195585	96195636	XBXL10_1g12956	X	+
Chr1L	86774720	86774771	XBXL10_1g1296	.	+
Chr3L	96269252	96269303	XBXL10_1g12961	X	+
Chr3L	96296128	96296179	XBXL10_1g12962	X	+
Chr3L	96336379	96336430	XBXL10_1g12963	X	+
Chr3L	96356168	96356219	XBXL10_1g12964	X	+
Chr3L	96413191	96413242	XBXL10_1g12966	X	+
Chr3L	96543552	96543603	XBXL10_1g12968	X	+
Chr3L	96544117	96544168	XBXL10_1g12969	X	+
Chr1L	86797172	86797223	XBXL10_1g1297	X	+
Chr3L	96684302	96684353	XBXL10_1g12974	.	+
Chr3L	96742300	96742351	XBXL10_1g12976	.	+
Chr3L	96783045	96783096	XBXL10_1g12977	.	+
Chr3L	96827399	96827450	XBXL10_1g12978	.	+
Chr3L	96896104	96896155	XBXL10_1g12979	.	+
Chr1L	86815692	86815743	XBXL10_1g1298	.	+
Chr3L	96897812	96897863	XBXL10_1g12980	X	+
Chr3L	97102413	97102464	XBXL10_1g12983	X	+
Chr3L	97142358	97142409	XBXL10_1g12985	X	+
Chr3L	97372856	97372907	XBXL10_1g12989	X	+
Chr3L	97423898	97423949	XBXL10_1g12991	.	+
Chr3L	97572793	97572844	XBXL10_1g12992	.	+
Chr3L	97672933	97672984	XBXL10_1g12994	X	+
Chr3L	97713878	97713929	XBXL10_1g12996	.	+
Chr3L	97756997	97757048	XBXL10_1g12997	X	+
Chr3L	97847357	97847408	XBXL10_1g12999	X	+
Chr1L	86899381	86899432	XBXL10_1g1300	X	+
Chr3L	98007663	98007714	XBXL10_1g13001	.	+
Chr3L	98084831	98084882	XBXL10_1g13003	X	+
Chr3L	98146183	98146234	XBXL10_1g13006	X	+
Chr3L	98263274	98263325	XBXL10_1g13008	X	+
Chr3L	98290743	98290794	XBXL10_1g13009	X	+
Chr1L	86931530	86931581	XBXL10_1g1301	X	+
Chr3L	98356085	98356136	XBXL10_1g13011	X	+
Chr3L	98519744	98519795	XBXL10_1g13016	X	+
Chr3L	98799006	98799057	XBXL10_1g13018	X	+
Chr1L	86939778	86939829	XBXL10_1g1302	X	+
Chr3L	98877269	98877320	XBXL10_1g13020	X	+
Chr3L	98909027	98909078	XBXL10_1g13021	X	+
Chr3L	98937511	98937562	XBXL10_1g13022	X	+
Chr3L	99027059	99027110	XBXL10_1g13024	X	+
Chr3L	99385151	99385202	XBXL10_1g13028	X	+
Chr3L	99395284	99395335	XBXL10_1g13029	X	+
Chr1L	86982335	86982386	XBXL10_1g1303	X	+
Chr3L	99419858	99419909	XBXL10_1g13030	X	+
Chr3L	99450252	99450303	XBXL10_1g13032	X	+
Chr3L	99480984	99481035	XBXL10_1g13033	X	+
Chr3L	99676734	99676785	XBXL10_1g13037	.	+
Chr3L	99695536	99695587	XBXL10_1g13038	X	+
Chr1L	87005181	87005232	XBXL10_1g1304	X	+
Chr3L	99760934	99760985	XBXL10_1g13040	X	+
Chr3L	99839757	99839808	XBXL10_1g13043	X	+
Chr3L	100039944	100039995	XBXL10_1g13049	X	+
Chr1L	87210917	87210968	XBXL10_1g1306	X	+
Chr3L	100345512	100345563	XBXL10_1g13061	.	+
Chr3L	100357745	100357796	XBXL10_1g13063	X	+
Chr3L	100426014	100426065	XBXL10_1g13064	X	+
Chr3L	100462248	100462299	XBXL10_1g13065	X	+
Chr3L	100573264	100573315	XBXL10_1g13068	X	+
Chr3L	100597895	100597946	XBXL10_1g13070	X	+
Chr3L	100660299	100660350	XBXL10_1g13072	.	+
Chr1L	87343607	87343658	XBXL10_1g1308	X	+
Chr3L	100772427	100772478	XBXL10_1g13080	X	+
Chr3L	100805175	100805226	XBXL10_1g13081	X	+
Chr3L	100813373	100813424	XBXL10_1g13082	.	+
Chr3L	100849653	100849704	XBXL10_1g13085	X	+
Chr3L	100851315	100851366	XBXL10_1g13086	X	+
Chr3L	100851580	100851631	XBXL10_1g13087	X	+
Chr3L	100851845	100851896	XBXL10_1g13088	X	+
Chr3L	100852161	100852212	XBXL10_1g13089	X	+
Chr3L	100852426	100852477	XBXL10_1g13090	X	+
Chr3L	100852691	100852742	XBXL10_1g13091	X	+
Chr3L	100853007	100853058	XBXL10_1g13092	X	+
Chr3L	100853323	100853374	XBXL10_1g13093	X	+
Chr3L	100853639	100853690	XBXL10_1g13094	X	+
Chr3L	100853955	100854006	XBXL10_1g13095	X	+
Chr3L	100854271	100854322	XBXL10_1g13096	X	+
Chr3L	100854536	100854587	XBXL10_1g13097	X	+
Chr3L	100854853	100854904	XBXL10_1g13098	X	+
Chr3L	100855169	100855220	XBXL10_1g13099	X	+
Chr3L	100855434	100855485	XBXL10_1g13100	X	+
Chr3L	100855699	100855750	XBXL10_1g13101	X	+
Chr3L	100856015	100856066	XBXL10_1g13102	X	+
Chr3L	100856331	100856382	XBXL10_1g13103	X	+
Chr3L	100856647	100856698	XBXL10_1g13104	X	+
Chr3L	100856963	100857014	XBXL10_1g13105	X	+
Chr3L	100857279	100857330	XBXL10_1g13106	X	+
Chr3L	100857595	100857646	XBXL10_1g13107	X	+
Chr3L	100857911	100857962	XBXL10_1g13108	X	+
Chr3L	100858227	100858278	XBXL10_1g13109	X	+
Chr1L	87486864	87486915	XBXL10_1g1311	X	+
Chr3L	100858543	100858594	XBXL10_1g13110	X	+
Chr3L	100858859	100858910	XBXL10_1g13111	X	+
Chr3L	100859124	100859175	XBXL10_1g13112	.	+
Chr3L	100859440	100859491	XBXL10_1g13113	X	+
Chr3L	100859756	100859807	XBXL10_1g13114	X	+
Chr3L	100860072	100860123	XBXL10_1g13115	X	+
Chr3L	100860388	100860439	XBXL10_1g13116	X	+
Chr3L	100860704	100860755	XBXL10_1g13117	.	+
Chr3L	100860969	100861020	XBXL10_1g13118	X	+
Chr3L	100876069	100876120	XBXL10_1g13119	X	+
Chr1L	87518034	87518085	XBXL10_1g1312	X	+
Chr3L	100893871	100893922	XBXL10_1g13120	.	+
Chr3L	100926057	100926108	XBXL10_1g13121	X	+
Chr3L	100992171	100992222	XBXL10_1g13123	.	+
Chr3L	101061271	101061322	XBXL10_1g13125	X	+
Chr3L	101318639	101318690	XBXL10_1g13126	X	+
Chr3L	101841613	101841664	XBXL10_1g13128	X	+
Chr3L	101888737	101888788	XBXL10_1g13129	X	+
Chr1L	87577916	87577967	XBXL10_1g1313	X	+
Chr3L	102029887	102029938	XBXL10_1g13133	X	+
Chr3L	102302826	102302877	XBXL10_1g13136	.	+
Chr3L	102394971	102395022	XBXL10_1g13137	X	+
Chr3L	102464066	102464117	XBXL10_1g13139	X	+
Chr3L	102594616	102594667	XBXL10_1g13140	X	+
Chr3L	103036357	103036408	XBXL10_1g13142	X	+
Chr3L	103377125	103377176	XBXL10_1g13144	.	+
Chr3L	103417615	103417666	XBXL10_1g13145	X	+
Chr3L	103481129	103481180	XBXL10_1g13148	X	+
Chr3L	103598037	103598088	XBXL10_1g13149	X	+
Chr3L	104372367	104372418	XBXL10_1g13155	X	+
Chr3L	104548099	104548150	XBXL10_1g13157	X	+
Chr3L	104577700	104577751	XBXL10_1g13158	X	+
Chr3L	104589340	104589391	XBXL10_1g13159	X	+
Chr1L	87664835	87664886	XBXL10_1g1316	X	+
Chr3L	104644456	104644507	XBXL10_1g13161	X	+
Chr3L	104941795	104941846	XBXL10_1g13165	X	+
Chr3L	105115303	105115354	XBXL10_1g13167	.	+
Chr1L	87740724	87740775	XBXL10_1g1317	X	+
Chr3L	105268088	105268139	XBXL10_1g13170	X	+
Chr3L	105489403	105489454	XBXL10_1g13172	X	+
Chr3L	105561907	105561958	XBXL10_1g13173	X	+
Chr3L	105641936	105641987	XBXL10_1g13175	X	+
Chr3L	105727571	105727622	XBXL10_1g13176	X	+
Chr3L	105834267	105834318	XBXL10_1g13177	X	+
Chr3L	105933527	105933578	XBXL10_1g13178	X	+
Chr3L	105944641	105944692	XBXL10_1g13179	X	+
Chr1L	88011796	88011847	XBXL10_1g1318	X	+
Chr3L	105966364	105966415	XBXL10_1g13181	X	+
Chr3L	106016058	106016109	XBXL10_1g13183	X	+
Chr3L	106018150	106018201	XBXL10_1g13184	X	+
Chr3L	106056401	106056452	XBXL10_1g13185	X	+
Chr3L	106656265	106656316	XBXL10_1g13187	.	+
Chr3L	107111187	107111238	XBXL10_1g13189	.	+
Chr3L	107195766	107195817	XBXL10_1g13191	X	+
Chr3L	107233972	107234023	XBXL10_1g13192	X	+
Chr3L	107249969	107250020	XBXL10_1g13193	X	+
Chr3L	107362949	107363000	XBXL10_1g13194	X	+
Chr3L	107422749	107422800	XBXL10_1g13195	.	+
Chr3L	107455614	107455665	XBXL10_1g13196	X	+
Chr1L	4746646	4746697	XBXL10_1g132	X	+
Chr1L	88088025	88088076	XBXL10_1g1320	.	+
Chr3L	107736573	107736624	XBXL10_1g13200	X	+
Chr3L	107783772	107783823	XBXL10_1g13201	X	+
Chr3L	107844928	107844979	XBXL10_1g13203	X	+
Chr3L	108005141	108005192	XBXL10_1g13206	.	+
Chr3L	108493897	108493948	XBXL10_1g13208	X	+
Chr3L	108899411	108899462	XBXL10_1g13209	X	+
Chr3L	108972655	108972706	XBXL10_1g13210	X	+
Chr3L	109199024	109199075	XBXL10_1g13211	X	+
Chr3L	109278119	109278170	XBXL10_1g13213	X	+
Chr3L	109353277	109353328	XBXL10_1g13214	X	+
Chr3L	109607873	109607924	XBXL10_1g13217	X	+
Chr3L	109747110	109747161	XBXL10_1g13221	X	+
Chr3L	109898779	109898830	XBXL10_1g13223	X	+
Chr3L	109973651	109973702	XBXL10_1g13224	X	+
Chr3L	110193799	110193850	XBXL10_1g13227	X	+
Chr3L	110212871	110212922	XBXL10_1g13229	X	+
Chr1L	88346719	88346770	XBXL10_1g1323	.	+
Chr3L	110229536	110229587	XBXL10_1g13230	X	+
Chr3L	110282547	110282598	XBXL10_1g13231	X	+
Chr3L	110314021	110314072	XBXL10_1g13233	X	+
Chr3L	110340973	110341024	XBXL10_1g13234	X	+
Chr3L	110382617	110382668	XBXL10_1g13235	X	+
Chr3L	110457603	110457654	XBXL10_1g13236	X	+
Chr3L	110517415	110517466	XBXL10_1g13237	X	+
Chr3L	110565154	110565205	XBXL10_1g13240	X	+
Chr3L	110601706	110601757	XBXL10_1g13241	.	+
Chr3L	110666631	110666682	XBXL10_1g13243	X	+
Chr3L	110743466	110743517	XBXL10_1g13244	X	+
Chr3L	110899614	110899665	XBXL10_1g13247	X	+
Chr3L	111029044	111029095	XBXL10_1g13249	X	+
Chr1L	88389369	88389420	XBXL10_1g1325	X	+
Chr3L	111067084	111067135	XBXL10_1g13251	.	+
Chr3L	111236713	111236764	XBXL10_1g13254	X	+
Chr3L	111317403	111317454	XBXL10_1g13256	.	+
Chr3L	111595464	111595515	XBXL10_1g13258	X	+
Chr1L	88428462	88428513	XBXL10_1g1326	X	+
Chr3L	111854695	111854746	XBXL10_1g13260	X	+
Chr3L	112266008	112266059	XBXL10_1g13261	X	+
Chr3L	112310302	112310353	XBXL10_1g13262	X	+
Chr3L	112323140	112323191	XBXL10_1g13263	X	+
Chr3L	112617490	112617541	XBXL10_1g13267	X	+
Chr3L	112694089	112694140	XBXL10_1g13268	.	+
Chr3L	112700226	112700277	XBXL10_1g13269	X	+
Chr3L	112805836	112805887	XBXL10_1g13271	X	+
Chr3L	113032531	113032582	XBXL10_1g13273	.	+
Chr3L	113119660	113119711	XBXL10_1g13275	X	+
Chr3L	113154305	113154356	XBXL10_1g13276	X	+
Chr3L	113237295	113237346	XBXL10_1g13278	.	+
Chr3L	113262580	113262631	XBXL10_1g13279	X	+
Chr1L	88490695	88490746	XBXL10_1g1328	.	+
Chr3L	113303952	113304003	XBXL10_1g13281	X	+
Chr3L	113347147	113347198	XBXL10_1g13282	X	+
Chr3L	113407885	113407936	XBXL10_1g13284	X	+
Chr3L	113430014	113430065	XBXL10_1g13286	X	+
Chr3L	113560764	113560815	XBXL10_1g13287	X	+
Chr3L	113704713	113704764	XBXL10_1g13288	.	+
Chr3L	113790517	113790568	XBXL10_1g13289	X	+
Chr1L	88537213	88537264	XBXL10_1g1329	X	+
Chr3L	113851384	113851435	XBXL10_1g13290	X	+
Chr3L	113876564	113876615	XBXL10_1g13291	X	+
Chr3L	113895278	113895329	XBXL10_1g13292	X	+
Chr3L	113974501	113974552	XBXL10_1g13296	X	+
Chr3L	114218665	114218716	XBXL10_1g13298	X	+
Chr1L	4747196	4747247	XBXL10_1g133	X	+
Chr1L	88614974	88615025	XBXL10_1g1330	X	+
Chr3L	114301322	114301373	XBXL10_1g13300	X	+
Chr3L	114334157	114334208	XBXL10_1g13301	X	+
Chr3L	114367099	114367150	XBXL10_1g13302	.	+
Chr3L	114415539	114415590	XBXL10_1g13303	X	+
Chr3L	114510076	114510127	XBXL10_1g13306	X	+
Chr3L	114813183	114813234	XBXL10_1g13313	.	+
Chr3L	114829027	114829078	XBXL10_1g13314	X	+
Chr3L	114842646	114842697	XBXL10_1g13315	.	+
Chr3L	114906925	114906976	XBXL10_1g13317	.	+
Chr3L	114907689	114907740	XBXL10_1g13318	.	+
Chr3L	114909706	114909757	XBXL10_1g13319	X	+
Chr1L	88798809	88798860	XBXL10_1g1332	X	+
Chr3L	114910566	114910617	XBXL10_1g13320	X	+
Chr3L	114911671	114911722	XBXL10_1g13321	X	+
Chr3L	114912583	114912634	XBXL10_1g13323	X	+
Chr3L	114920088	114920139	XBXL10_1g13325	X	+
Chr3L	114931232	114931283	XBXL10_1g13326	X	+
Chr3L	114945080	114945131	XBXL10_1g13327	.	+
Chr3L	115020039	115020090	XBXL10_1g13329	X	+
Chr1L	88825685	88825736	XBXL10_1g1333	X	+
Chr3L	115058786	115058837	XBXL10_1g13331	X	+
Chr3L	115131093	115131144	XBXL10_1g13333	X	+
Chr3L	115154869	115154920	XBXL10_1g13334	.	+
Chr3L	115497751	115497802	XBXL10_1g13338	X	+
Chr3L	115555062	115555113	XBXL10_1g13340	X	+
Chr3L	115633915	115633966	XBXL10_1g13342	X	+
Chr3L	115714807	115714858	XBXL10_1g13343	X	+
Chr3L	116089577	116089628	XBXL10_1g13347	X	+
Chr3L	116167239	116167290	XBXL10_1g13349	X	+
Chr1L	88902467	88902518	XBXL10_1g1335	X	+
Chr3L	116535052	116535103	XBXL10_1g13351	.	+
Chr3L	117485621	117485672	XBXL10_1g13353	X	+
Chr3L	117715610	117715661	XBXL10_1g13355	.	+
Chr3L	117926602	117926653	XBXL10_1g13356	.	+
Chr3L	118296030	118296081	XBXL10_1g13357	.	+
Chr3L	118564371	118564422	XBXL10_1g13359	X	+
Chr1L	88945106	88945157	XBXL10_1g1336	X	+
Chr3L	119056691	119056742	XBXL10_1g13361	X	+
Chr3L	120165612	120165663	XBXL10_1g13363	X	+
Chr3L	120954031	120954082	XBXL10_1g13365	X	+
Chr3L	121095701	121095752	XBXL10_1g13367	X	+
Chr3L	121413366	121413417	XBXL10_1g13369	X	+
Chr3L	121415731	121415782	XBXL10_1g13370	.	+
Chr3L	121457993	121458044	XBXL10_1g13371	X	+
Chr3L	121608104	121608155	XBXL10_1g13372	X	+
Chr3L	121834254	121834305	XBXL10_1g13375	X	+
Chr3L	121937152	121937203	XBXL10_1g13377	X	+
Chr3L	122061252	122061303	XBXL10_1g13378	X	+
Chr3L	122103730	122103781	XBXL10_1g13379	X	+
Chr3L	122184384	122184435	XBXL10_1g13380	.	+
Chr3L	122315294	122315345	XBXL10_1g13383	.	+
Chr3L	122545169	122545220	XBXL10_1g13389	.	+
Chr1L	89850962	89851013	XBXL10_1g1339	.	+
Chr3L	122608738	122608789	XBXL10_1g13390	X	+
Chr3L	122650690	122650741	XBXL10_1g13392	X	+
Chr3L	122705967	122706018	XBXL10_1g13393	X	+
Chr3L	122715686	122715737	XBXL10_1g13394	X	+
Chr3L	122737089	122737140	XBXL10_1g13395	X	+
Chr3L	122747854	122747905	XBXL10_1g13396	X	+
Chr3L	122785895	122785946	XBXL10_1g13398	X	+
Chr1L	90149850	90149901	XBXL10_1g1340	X	+
Chr3L	122908926	122908977	XBXL10_1g13401	.	+
Chr3L	123158557	123158608	XBXL10_1g13406	X	+
Chr3L	123205044	123205095	XBXL10_1g13409	X	+
Chr3L	123327559	123327610	XBXL10_1g13412	X	+
Chr3L	123554867	123554918	XBXL10_1g13415	X	+
Chr3L	123621369	123621420	XBXL10_1g13416	X	+
Chr3L	123665867	123665918	XBXL10_1g13419	X	+
Chr3L	123765919	123765970	XBXL10_1g13429	X	+
Chr1L	90254115	90254166	XBXL10_1g1343	X	+
Chr3L	123823701	123823752	XBXL10_1g13430	X	+
Chr3L	123957375	123957426	XBXL10_1g13431	X	+
Chr3L	124051580	124051631	XBXL10_1g13433	X	+
Chr3L	124123758	124123809	XBXL10_1g13434	X	+
Chr3L	124144043	124144094	XBXL10_1g13435	X	+
Chr3L	124256740	124256791	XBXL10_1g13436	X	+
Chr3L	124308652	124308703	XBXL10_1g13437	X	+
Chr3L	124354859	124354910	XBXL10_1g13440	X	+
Chr3L	124461025	124461076	XBXL10_1g13442	X	+
Chr3L	124567297	124567348	XBXL10_1g13444	X	+
Chr3L	124631538	124631589	XBXL10_1g13445	X	+
Chr3L	124664348	124664399	XBXL10_1g13446	X	+
Chr3L	124789979	124790030	XBXL10_1g13450	X	+
Chr3L	124867221	124867272	XBXL10_1g13452	X	+
Chr3L	125013245	125013296	XBXL10_1g13458	X	+
Chr1L	90393372	90393423	XBXL10_1g1346	X	+
Chr3L	125270960	125271011	XBXL10_1g13461	.	+
Chr3L	125325393	125325444	XBXL10_1g13463	X	+
Chr3L	125345900	125345951	XBXL10_1g13464	X	+
Chr3L	125743883	125743934	XBXL10_1g13466	.	+
Chr3L	125846072	125846123	XBXL10_1g13467	X	+
Chr3L	125882303	125882354	XBXL10_1g13468	X	+
Chr3L	128208793	128208844	XBXL10_1g13476	.	+
Chr3L	128221612	128221663	XBXL10_1g13477	X	+
Chr3L	128252292	128252343	XBXL10_1g13478	X	+
Chr3L	128284641	128284692	XBXL10_1g13479	X	+
Chr1L	90472033	90472084	XBXL10_1g1348	X	+
Chr3L	128305148	128305199	XBXL10_1g13480	X	+
Chr3L	128437907	128437958	XBXL10_1g13483	X	+
Chr3L	128827580	128827631	XBXL10_1g13486	.	+
Chr3L	129132436	129132487	XBXL10_1g13488	X	+
Chr3L	129169923	129169974	XBXL10_1g13490	X	+
Chr3L	129227578	129227629	XBXL10_1g13491	X	+
Chr3L	129324416	129324467	XBXL10_1g13492	X	+
Chr3L	129395558	129395609	XBXL10_1g13496	X	+
Chr3L	129416398	129416449	XBXL10_1g13498	X	+
Chr1L	90628545	90628596	XBXL10_1g1350	X	+
Chr3L	129600198	129600249	XBXL10_1g13500	.	+
Chr3L	129868831	129868882	XBXL10_1g13503	X	+
Chr3L	129962406	129962457	XBXL10_1g13505	X	+
Chr3L	130011179	130011230	XBXL10_1g13506	X	+
Chr3L	130134877	130134928	XBXL10_1g13508	X	+
Chr3L	130305195	130305246	XBXL10_1g13514	.	+
Chr3L	130464146	130464197	XBXL10_1g13517	X	+
Chr3L	130472627	130472678	XBXL10_1g13518	X	+
Chr3L	130496996	130497047	XBXL10_1g13519	X	+
Chr1L	90741318	90741369	XBXL10_1g1352	X	+
Chr3L	130591853	130591904	XBXL10_1g13520	X	+
Chr3L	130621528	130621579	XBXL10_1g13521	.	+
Chr3L	131771311	131771362	XBXL10_1g13523	.	+
Chr3L	132409932	132409983	XBXL10_1g13524	.	+
Chr3L	132464725	132464776	XBXL10_1g13525	.	+
Chr3L	132541452	132541503	XBXL10_1g13526	X	+
Chr1L	90758739	90758790	XBXL10_1g1353	X	+
Chr3L	132702043	132702094	XBXL10_1g13532	X	+
Chr3L	132766062	132766113	XBXL10_1g13534	X	+
Chr3L	132774082	132774133	XBXL10_1g13535	X	+
Chr1L	90800422	90800473	XBXL10_1g1354	.	+
Chr3L	132937348	132937399	XBXL10_1g13540	X	+
Chr3L	132970527	132970578	XBXL10_1g13541	X	+
Chr3L	133200215	133200266	XBXL10_1g13544	X	+
Chr3L	133210828	133210879	XBXL10_1g13545	.	+
Chr3L	133231533	133231584	XBXL10_1g13546	X	+
Chr3L	133260467	133260518	XBXL10_1g13547	X	+
Chr3L	133291429	133291480	XBXL10_1g13549	X	+
Chr1L	91032367	91032418	XBXL10_1g1355	X	+
Chr3L	133370179	133370230	XBXL10_1g13550	X	+
Chr3L	133418460	133418511	XBXL10_1g13553	X	+
Chr3L	133442939	133442990	XBXL10_1g13554	X	+
Chr3L	133493441	133493492	XBXL10_1g13557	X	+
Chr3L	133553307	133553358	XBXL10_1g13559	.	+
Chr1L	91214769	91214820	XBXL10_1g1356	X	+
Chr3L	133659015	133659066	XBXL10_1g13561	X	+
Chr3L	133757033	133757084	XBXL10_1g13563	.	+
Chr3L	133863944	133863995	XBXL10_1g13565	X	+
Chr3L	134070589	134070640	XBXL10_1g13570	.	+
Chr3L	134077972	134078023	XBXL10_1g13571	.	+
Chr3L	134088226	134088277	XBXL10_1g13572	.	+
Chr3L	134094319	134094370	XBXL10_1g13573	.	+
Chr3L	134120976	134121027	XBXL10_1g13575	.	+
Chr3L	134351359	134351410	XBXL10_1g13581	.	+
Chr3L	134373412	134373463	XBXL10_1g13582	X	+
Chr3L	134392056	134392107	XBXL10_1g13584	X	+
Chr3L	134436411	134436462	XBXL10_1g13586	X	+
Chr3L	134527319	134527370	XBXL10_1g13590	X	+
Chr3L	134544075	134544126	XBXL10_1g13591	.	+
Chr3L	134590783	134590834	XBXL10_1g13593	X	+
Chr3L	134835690	134835741	XBXL10_1g13598	.	+
Chr1L	91481919	91481970	XBXL10_1g1360	.	+
Chr3L	134905121	134905172	XBXL10_1g13601	X	+
Chr3L	134924814	134924865	XBXL10_1g13603	X	+
Chr3L	134960139	134960190	XBXL10_1g13604	X	+
Chr3L	135049324	135049375	XBXL10_1g13606	X	+
Chr3L	135076985	135077036	XBXL10_1g13607	X	+
Chr3L	135226190	135226241	XBXL10_1g13610	X	+
Chr3L	135385556	135385607	XBXL10_1g13614	.	+
Chr3L	135423125	135423176	XBXL10_1g13615	.	+
Chr3L	135428661	135428712	XBXL10_1g13616	.	+
Chr3L	135530010	135530061	XBXL10_1g13619	.	+
Chr3L	135548229	135548280	XBXL10_1g13620	.	+
Chr3L	135730769	135730820	XBXL10_1g13623	.	+
Chr3L	135797756	135797807	XBXL10_1g13625	X	+
Chr3L	135904226	135904277	XBXL10_1g13628	X	+
Chr3L	136136584	136136635	XBXL10_1g13630	X	+
Chr3L	136209027	136209078	XBXL10_1g13631	.	+
Chr3L	136217765	136217816	XBXL10_1g13632	X	+
Chr3L	136258905	136258956	XBXL10_1g13633	X	+
Chr3L	136496931	136496982	XBXL10_1g13641	.	+
Chr3L	136553925	136553976	XBXL10_1g13643	.	+
Chr3L	136574087	136574138	XBXL10_1g13644	.	+
Chr3L	136578318	136578369	XBXL10_1g13645	.	+
Chr3L	136644662	136644713	XBXL10_1g13647	.	+
Chr3L	136648878	136648929	XBXL10_1g13648	.	+
Chr1L	92321461	92321512	XBXL10_1g1365	X	+
Chr3L	136697830	136697881	XBXL10_1g13650	.	+
Chr3L	136830317	136830368	XBXL10_1g13655	.	+
Chr3L	137204892	137204943	XBXL10_1g13662	X	+
Chr3L	137312739	137312790	XBXL10_1g13667	X	+
Chr1L	92709824	92709875	XBXL10_1g1367	.	+
Chr3L	137578472	137578523	XBXL10_1g13675	X	+
Chr3L	137800025	137800076	XBXL10_1g13679	X	+
Chr3L	137865465	137865516	XBXL10_1g13683	X	+
Chr3L	137879433	137879484	XBXL10_1g13684	.	+
Chr3L	137910471	137910522	XBXL10_1g13685	X	+
Chr3L	137985977	137986028	XBXL10_1g13687	X	+
Chr3L	138011766	138011817	XBXL10_1g13688	X	+
[truncated: 42,478 more rows]

## Sheet: Legend
Column	Description
Chr	chromosome
Start	start coordinate
End	end coordinate
Geneid	xenbase gene ID
RNA-seq_support	X = supported by RNA-seq, . = most upstream
Strand	strand of the gene
