# Supplementary material for: Hybridization led to a rewired pluripotency network in the allotetraploid Xenopus laevis
Source: eLife. 2023 Oct 3;12:e83952. doi: 10.7554/eLife.83952 (PMC10569791; doi:10.7554/eLife.83952)
Supplement: Supplementary file 5. [file elife-83952-supp5.xlsx]

## Sheet: A. All ATAC regions
chr	start	end	Enh_id	Category	noab	s8_k27ac_1	s8_k27ac_2	s8_k27ac_3	s8_k27ac_4	s9_k27ac_1	s9_k27ac_2	s8_atac_1	s8_atac_2	s8_atac_3	s9_atac_1	s9_atac_2	s9_atac_3
Chr1L	54983	55484	L_dist_lo_1	distal_low_conf	0.111	0.828	1.29	1.03	0.512	0.289	1.907	4.053	0	0	0.903	2.57	1.318
Chr1L	81469	81970	L_dist_noab_2	distal_noab_high	0.554	0.414	0.573	0.343	0.384	0.434	0.954	0	0	0	1.204	1.714	0.33
Chr1L	171677	172178	L_prox_noab_3	proximal_noab_high	0.444	0.828	0.43	0.343	0	0.145	0.381	0	1.97	0	8.728	8.853	7.25
Chr1L	176388	176889	L_dist_noab_4	distal_noab_high	0.665	0.828	0.573	1.716	0.897	0.867	0.954	0	0	0	3.311	1.999	2.307
Chr1L	180229	180730	L_dist_lo_5	distal_low_conf	0.333	0	1.577	0.686	1.025	1.156	0.572	0	3.941	8.334	3.311	3.427	3.295
Chr1L	180483	180984	L_dist_lo_6	distal_low_conf	0.111	0	0.86	0.343	1.153	0.434	0.572	0	5.911	8.334	2.408	3.427	2.636
Chr1L	183614	184115	L_prox_hi_7	proximal_high_conf	0.665	4.967	4.874	4.805	1.665	1.879	2.67	4.053	3.941	0	9.631	11.709	9.227
Chr1L	198200	198701	L_dist_noab_8	distal_noab_high	0.998	2.69	1.864	1.03	1.921	0.578	1.144	0	0	8.334	3.612	2.285	1.977
Chr1L	202246	202747	L_dist_noab_9	distal_noab_high	0.776	1.035	0.287	0.686	0.128	0.289	1.144	4.053	0	0	1.806	1.142	0.989
Chr1L	247399	247900	L_prox_lo_10	proximal_low_conf	0.222	0.414	0.43	0.686	0.64	1.012	0.381	0	5.911	0	5.116	7.997	4.284
Chr1L	263286	263787	L_dist_lo_11	distal_low_conf	0.111	0.414	0	0.343	0.384	0.289	0.191	0	0	0	1.505	1.999	0.659
Chr1L	336833	337334	L_prox_noab_12	proximal_noab_high	0.444	0.207	0.717	0.343	0.897	0.145	0.572	0	1.97	0	1.505	1.714	0.989
Chr1L	342041	342542	L_dist_noab_13	distal_noab_high	0.333	0.207	0.573	0.343	0.128	0.289	0.572	0	0	0	2.107	2.285	3.625
Chr1L	370914	371415	L_dist_noab_14	distal_noab_high	0.222	0.414	0.43	0	0.256	0.145	0.191	4.053	3.941	0	2.107	0.857	0.33
Chr1L	373706	374207	L_prox_hi_15	proximal_high_conf	0.222	2.69	3.154	5.149	1.793	1.012	0.954	0	1.97	0	5.116	3.427	4.284
Chr1L	374009	374510	L_prox_lo_16	proximal_low_conf	0.554	2.276	3.44	5.492	2.433	1.59	1.716	0	1.97	0	3.612	3.998	0.989
Chr1L	420338	420839	L_prox_noab_17	proximal_noab_high	0.333	0.207	0.143	0	0.384	1.012	0.381	0	1.97	0	1.505	2.285	0.989
Chr1L	421070	421571	L_prox_lo_18	proximal_low_conf	0.111	0	0.717	0.686	0.512	1.012	1.144	0	0	0	2.107	1.714	2.636
Chr1L	448940	449441	L_dist_noab_19	distal_noab_high	0.444	0.207	0.43	0.343	0.512	1.012	0.763	0	3.941	0	2.709	2.57	1.318
Chr1L	479240	479741	L_prox_hi_20	proximal_high_conf	0.444	1.449	1.29	2.403	0.64	0.578	0.572	0	1.97	0	3.612	5.426	4.943
Chr1L	479606	480107	L_prox_lo_21	proximal_low_conf	0.444	1.242	0.717	2.059	0.64	0.723	0.572	0	3.941	0	5.718	5.712	5.602
Chr1L	488071	488572	L_dist_noab_22	distal_noab_high	0.111	0	0.287	0	0.384	0.145	0.954	0	0	0	1.204	1.999	0.659
Chr1L	493829	494330	L_dist_noab_23	distal_noab_high	0.444	0.207	0.287	0.686	0.384	0.145	0.191	4.053	0	0	0.903	1.142	1.318
Chr1L	501655	502156	L_prox_lo_24	proximal_low_conf	0	0	0.287	0	0	0.434	0.191	4.053	0	8.334	2.709	2.57	2.307
Chr1L	502346	502847	L_prox_noab_25	proximal_noab_high	0.333	0.207	0.43	0	0.128	0.289	0.191	0	0	0	1.204	1.142	1.648
Chr1L	502925	503426	L_prox_lo_26	proximal_low_conf	0.333	0.414	1.147	1.373	0.384	0.434	0.572	0	1.97	0	0.602	1.714	1.648
Chr1L	520039	520540	L_dist_noab_27	distal_noab_high	0.333	0.621	0	0	0	0.145	0.191	0	3.941	0	2.408	2.285	0.33
Chr1L	530823	531324	L_prox_lo_28	proximal_low_conf	0.222	0.414	0.717	1.716	1.025	0.578	0.191	4.053	0	0	2.408	1.714	1.318
Chr1L	553261	553762	L_dist_noab_29	distal_noab_high	0.333	0	0.143	0.343	0.512	0.289	0	4.053	1.97	0	1.806	1.714	0.659
Chr1L	554691	555192	L_dist_lo_30	distal_low_conf	0.333	0.828	0.573	2.403	0.768	0.723	0.763	4.053	3.941	0	1.806	1.999	0.989
Chr1L	557885	558386	L_dist_noab_31	distal_noab_high	0.333	0.414	0.86	1.03	0.256	0.867	0.763	0	5.911	0	4.815	5.141	4.943
Chr1L	564925	565426	L_prox_lo_32	proximal_low_conf	0.444	2.483	2.437	0.343	0.768	0.867	2.289	0	3.941	0	5.116	3.427	3.954
Chr1L	565424	565925	L_prox_noab_33	proximal_noab_high	0.554	1.863	1.147	1.373	0.128	0.578	1.526	0	5.911	0	8.427	10.567	13.182
Chr1L	590401	590902	L_dist_lo_34	distal_low_conf	0.333	1.242	1.003	1.03	0.64	0.289	0.763	0	0	0	1.204	1.714	0.989
Chr1L	610469	610970	L_dist_lo_35	distal_low_conf	0.111	0.621	0.573	0	0.384	0.145	0.381	0	0	0	1.505	1.142	1.318
Chr1L	617254	617755	L_dist_noab_36	distal_noab_high	0.111	0.207	0.573	0	0.128	0.145	0.572	0	0	0	2.709	0	1.318
Chr1L	621156	621657	L_prox_noab_37	proximal_noab_high	0.111	0	0.143	0.343	0.128	0	0.191	0	7.882	0	1.806	2.57	4.284
Chr1L	623584	624085	L_dist_noab_38	distal_noab_high	0.333	0	0.143	0.343	0.128	0.289	0.191	0	0	0	2.107	2.856	2.307
Chr1L	651805	652306	L_dist_noab_39	distal_noab_high	0.554	0.414	0.717	0.343	0.768	0.578	1.335	0	3.941	8.334	3.01	1.714	0.989
Chr1L	656208	656709	L_dist_noab_40	distal_noab_high	0.222	0.207	0.573	0	0.512	0.723	0.381	0	0	8.334	2.709	3.427	1.648
Chr1L	667514	668015	L_prox_hi_41	proximal_high_conf	0.444	1.449	2.437	1.03	0.384	0.867	0.572	0	0	8.334	2.408	6.569	7.909
Chr1L	667976	668477	L_prox_hi_42	proximal_high_conf	0.111	1.656	2.58	1.373	0.897	1.156	0.954	8.106	7.882	8.334	4.213	5.141	7.909
Chr1L	677036	677537	L_dist_lo_43	distal_low_conf	0.554	2.276	3.727	0.686	0.768	0.867	0.954	0	1.97	0	2.107	4.284	2.307
Chr1L	678176	678677	L_dist_hi_44	distal_high_conf	0.665	3.725	5.161	2.746	1.409	1.012	1.716	0	3.941	8.334	7.223	5.141	5.273
Chr1L	679382	679883	L_dist_hi_45	distal_high_conf	0.333	1.449	2.437	1.03	1.281	0.289	1.526	0	3.941	0	1.806	1.428	1.318
Chr1L	679983	680484	L_dist_hi_46	distal_high_conf	0.998	4.553	4.014	2.403	1.281	0.867	3.051	4.053	1.97	0	3.01	2.856	2.307
Chr1L	684695	685196	L_dist_hi_47	distal_high_conf	0.222	2.897	3.154	1.373	1.025	0.578	0.381	4.053	0	16.667	2.107	2.57	3.295
Chr1L	684936	685437	L_prox_hi_48	proximal_high_conf	0.222	2.069	2.867	1.03	1.153	0.578	0.381	4.053	1.97	16.667	3.612	2.57	2.636
Chr1L	686697	687198	L_prox_lo_49	proximal_low_conf	0	1.656	0.86	0.686	0.384	0.434	0.191	0	1.97	0	3.311	1.428	1.648
Chr1L	687405	687906	L_dist_lo_50	distal_low_conf	0.444	1.656	0.86	0.686	1.153	1.012	0.191	0	3.941	0	3.311	1.714	2.636
Chr1L	689886	690387	L_dist_lo_51	distal_low_conf	0.111	0.828	0.43	0.343	0.256	0.145	0	8.106	1.97	0	4.213	3.141	5.932
Chr1L	691751	692252	L_dist_noab_52	distal_noab_high	0.333	0.621	0.287	0.343	0.384	0.434	0.572	0	3.941	0	2.107	2.856	1.977
Chr1L	693443	693944	L_prox_lo_53	proximal_low_conf	0.111	1.035	0.86	0.686	1.025	0.578	0.381	0	0	0	2.408	4.284	4.943
Chr1L	695307	695808	L_dist_noab_54	distal_noab_high	0.665	1.035	1.147	0.343	1.025	0.723	0.381	4.053	0	0	1.806	2.285	2.307
Chr1L	707760	708261	L_prox_hi_55	proximal_high_conf	0	2.069	4.157	2.059	1.409	1.445	0.572	12.158	9.852	0	12.64	11.995	12.193
Chr1L	708154	708655	L_prox_hi_56	proximal_high_conf	0.111	0.621	1.29	2.746	1.537	1.012	0.572	0	0	0	3.01	5.426	1.648
Chr1L	709122	709623	L_dist_lo_57	distal_low_conf	0.111	0	0.43	1.373	0.512	0.578	0.572	4.053	0	0	2.408	2.285	1.977
Chr1L	710137	710638	L_prox_noab_58	proximal_noab_high	0.887	0.414	0.143	0.343	0.256	0.434	0.381	0	1.97	0	3.01	3.427	2.966
Chr1L	710329	710830	L_prox_noab_59	proximal_noab_high	0.776	0.414	0.287	0.343	0.384	0.723	1.144	0	1.97	0	3.912	4.855	3.625
Chr1L	711308	711809	L_prox_noab_60	proximal_noab_high	0.222	0.207	0.287	0	0.384	1.445	0.572	0	0	8.334	5.417	4.569	2.636
Chr1L	712044	712545	L_prox_noab_61	proximal_noab_high	0.554	0.828	0.86	1.03	0.512	1.012	0.954	0	0	0	4.514	3.713	1.648
Chr1L	712672	713173	L_blklst_62	blacklisted	0.444	1.035	0.86	0.686	0.768	0.867	0.572	4.053	0	0	2.408	4.855	0.989
Chr1L	716347	716848	L_dist_lo_63	distal_low_conf	0.222	1.242	1.72	1.373	0.256	0.723	0.763	0	0	0	1.806	2.57	0.659
Chr1L	727827	728328	L_dist_lo_64	distal_low_conf	0.333	0.828	0.717	0.686	0.897	0.434	0.572	4.053	1.97	0	5.116	6.854	6.92
Chr1L	732719	733220	L_dist_noab_65	distal_noab_high	0.333	1.242	0.86	0.343	0.256	0.723	0.381	0	1.97	0	0.903	1.999	1.648
Chr1L	833648	834149	L_dist_noab_66	distal_noab_high	0.665	0.621	0.86	0	0.64	0.434	1.144	0	0	0	1.806	2.285	0.659
Chr1L	878878	879379	L_dist_noab_67	distal_noab_high	0.554	1.035	1.433	0	0.512	1.445	2.861	16.211	1.97	0	2.709	2.285	6.92
Chr1L	1816344	1816845	L_dist_lo_68	distal_low_conf	0.222	0.207	0.86	0.686	1.025	0.723	0.191	0	1.97	0	1.505	0.857	0.989
Chr1L	1900513	1901014	L_dist_noab_69	distal_noab_high	0.333	0.414	0.717	0	0.128	0.145	0	0	0	0	3.311	3.998	0.33
Chr1L	1910888	1911389	L_prox_noab_70	proximal_noab_high	0.554	0	0.717	1.03	0.256	0.723	0.572	4.053	3.941	0	1.806	1.142	1.648
Chr1L	2445178	2445679	L_dist_noab_71	distal_noab_high	0.444	0.621	0.86	0.343	0.384	0.867	0.572	0	0	0	3.311	2.285	0.659
Chr1L	2607220	2607721	L_dist_noab_72	distal_noab_high	0.444	0.207	0.43	0.343	0.512	0.145	0.191	0	1.97	0	1.204	0.571	1.648
Chr1L	2628225	2628726	L_dist_noab_73	distal_noab_high	0.444	0.207	0	0.343	0.128	0.434	0.763	0	0	0	0.903	2.856	1.648
Chr1L	2638419	2638920	L_dist_lo_74	distal_low_conf	0.554	1.656	0.86	2.059	0.512	3.035	1.526	0	0	0	1.204	1.428	2.307
Chr1L	2660249	2660750	L_dist_noab_75	distal_noab_high	0.665	0.828	0.573	0.343	0.512	0.578	1.144	0	0	0	5.718	4.284	1.977
Chr1L	3320001	3320502	L_dist_noab_76	distal_noab_high	0.887	0.621	0.43	0	0.64	0.578	1.144	0	3.941	0	2.107	1.428	0.989
Chr1L	3953196	3953697	L_dist_noab_77	distal_noab_high	0.222	0	0.287	0.343	0.768	0	0	0	0	0	0.602	1.714	0.989
Chr1L	4077432	4077933	L_dist_noab_78	distal_noab_high	0.444	1.656	0.717	0.686	0.384	1.156	0.763	0	0	0	3.311	1.999	1.318
Chr1L	4107738	4108239	L_dist_noab_79	distal_noab_high	0.554	0.621	1.864	0.686	0.768	0.723	0.954	0	0	0	1.204	1.428	1.648
Chr1L	4109573	4110074	L_dist_noab_80	distal_noab_high	0.222	0.207	0.143	0	0.384	0.289	0.191	0	0	0	1.505	1.142	1.648
Chr1L	4251103	4251604	L_dist_noab_81	distal_noab_high	0.776	1.035	1.29	0.686	0.512	1.734	4.196	0	0	0	1.505	0.857	1.648
Chr1L	4275481	4275982	L_dist_lo_82	distal_low_conf	0.111	0.621	0.43	0.686	0.64	1.012	2.479	0	1.97	0	1.806	3.141	1.648
Chr1L	4356307	4356808	L_prox_lo_83	proximal_low_conf	0	0.828	1.29	0.686	0.128	1.156	1.716	0	1.97	0	4.213	4.284	0.659
Chr1L	4433610	4434111	L_dist_lo_84	distal_low_conf	0.111	0.414	1.003	0.343	0	1.156	2.479	0	0	0	0.903	3.141	0.33
Chr1L	4750984	4751485	L_blklst_85	blacklisted	0.111	0.414	0.143	0.343	0.128	0.289	0	0	0	0	0.602	0	0.989
Chr1L	4755104	4755605	L_blklst_86	blacklisted	0.222	0.414	0.143	0	0.128	0.434	0.572	0	0	0	3.612	2.856	1.648
Chr1L	4755779	4756280	L_blklst_87	blacklisted	0.111	0.414	0	0	0.128	0.289	0	0	1.97	0	2.709	1.714	1.977
Chr1L	4757076	4757577	L_blklst_88	blacklisted	0	0	0	0	0	0	0	0	0	0	0.301	1.714	1.648
Chr1L	4773571	4774072	L_prox_noab_89	proximal_noab_high	0.222	0	0.287	0	0	0.145	0	0	0	0	0.301	0.286	4.943
Chr1L	4784828	4785329	L_blklst_90	blacklisted	0	0	0	0.686	0	0.145	0	0	0	0	1.204	0.857	2.966
Chr1L	4851232	4851733	L_prox_noab_91	proximal_noab_high	0.222	0.414	0.573	0.343	0	0.289	0.381	0	0	0	0	2.856	2.966
Chr1L	4852455	4852956	L_prox_noab_92	proximal_noab_high	0.665	0	0.143	0.343	0.256	0.723	1.335	0	0	0	2.709	1.999	0.33
Chr1L	4853049	4853550	L_prox_noab_93	proximal_noab_high	0.554	0.414	1.003	0.343	0.897	1.012	0.763	4.053	5.911	0	3.01	6.283	1.318
Chr1L	4856029	4856530	L_dist_noab_94	distal_noab_high	0.665	0.207	1.577	0.343	0.768	1.156	0.763	0	1.97	0	3.01	5.426	0.659
Chr1L	5421820	5422321	L_dist_lo_95	distal_low_conf	0.111	0	0.573	0.686	0.256	0.867	2.861	0	0	0	1.204	1.999	0.33
Chr1L	5648798	5649299	L_dist_lo_96	distal_low_conf	0	0.207	0	0	0.128	0	0.191	0	0	0	2.408	0.857	0.33
Chr1L	6167977	6168478	L_dist_lo_97	distal_low_conf	0.222	0	1.003	1.03	0.256	0.723	0.954	0	0	0	0.903	1.714	1.318
Chr1L	6701958	6702459	L_dist_lo_98	distal_low_conf	0	0.207	0.573	1.373	0	0	0.572	0	0	0	1.505	3.141	1.318
Chr1L	6716111	6716612	L_dist_lo_99	distal_low_conf	0.222	0.414	0.86	1.03	0.384	0.578	0.763	0	0	0	2.408	3.141	2.307
Chr1L	6717127	6717628	L_dist_noab_100	distal_noab_high	0.333	0.207	0.43	0.343	0.256	0	1.335	0	1.97	0	1.505	1.714	0.989
Chr1L	6805781	6806282	L_dist_noab_101	distal_noab_high	0.554	1.035	1.433	1.716	0.256	4.48	7.629	4.053	5.911	0	3.01	6.854	2.307
Chr1L	6997864	6998365	L_dist_lo_102	distal_low_conf	0	0.414	0.287	0	0.256	0.723	0.572	0	0	0	0.602	1.428	0.989
Chr1L	8162716	8163217	L_dist_lo_103	distal_low_conf	0.222	0.414	0.287	1.03	0.64	0.289	0.381	0	0	8.334	1.204	1.428	0.989
Chr1L	8455410	8455911	L_dist_noab_104	distal_noab_high	0.111	0	0	0	0.128	0.289	0.191	0	1.97	0	0.903	1.142	0
Chr1L	8592102	8592603	L_dist_noab_105	distal_noab_high	0.444	1.035	0.287	0.686	0.384	0.723	0.954	0	0	0	2.408	2.285	0.659
Chr1L	8602282	8602783	L_dist_noab_106	distal_noab_high	0.444	1.242	0.143	0.686	0.384	0.289	0	0	0	0	2.107	1.714	0
Chr1L	9053135	9053636	L_dist_noab_107	distal_noab_high	0.444	0.207	0.573	0.686	0.768	0.723	0.763	0	0	0	2.709	3.427	1.318
Chr1L	9053634	9054135	L_dist_noab_108	distal_noab_high	0.444	1.449	0.43	1.03	0.64	1.156	0.763	0	0	0	2.408	1.999	1.977
Chr1L	9056595	9057096	L_prox_lo_109	proximal_low_conf	0.333	0.414	1.003	1.373	0.384	2.601	5.531	0	0	0	3.01	0.286	1.648
Chr1L	9057310	9057811	L_prox_lo_110	proximal_low_conf	0.111	1.035	0.717	0.343	0.512	1.879	5.531	0	0	0	1.505	3.427	1.318
Chr1L	9057669	9058170	L_prox_noab_111	proximal_noab_high	0.554	1.242	1.003	1.373	0.512	3.035	6.675	0	0	0	4.514	4.284	1.977
Chr1L	9058309	9058810	L_dist_noab_112	distal_noab_high	0.665	0.621	0.287	0.343	0.256	1.879	4.577	0	0	0	2.107	1.428	0.659
Chr1L	9062981	9063482	L_dist_lo_113	distal_low_conf	0.333	0.828	0.287	1.03	1.025	1.59	0.954	0	0	0	2.408	1.999	0.989
Chr1L	9095481	9095982	L_prox_noab_114	proximal_noab_high	0.111	0.414	0.287	0	0	0.578	0.191	0	0	0	1.505	2.285	2.307
Chr1L	9101236	9101737	L_dist_lo_115	distal_low_conf	0.222	1.449	1.577	1.03	0.256	1.012	0.954	0	0	0	2.107	1.999	0
Chr1L	9555022	9555523	L_dist_noab_116	distal_noab_high	0.776	1.035	1.29	2.059	1.537	1.012	0.954	0	0	0	1.505	1.999	0.659
Chr1L	9695018	9695519	L_dist_lo_117	distal_low_conf	0.222	0.414	1.003	0.343	0.256	0.289	0.381	0	0	0	2.107	1.428	1.318
Chr1L	9696764	9697265	L_dist_noab_118	distal_noab_high	0.554	0.207	1.29	0.343	0.512	0.867	0.954	4.053	0	0	1.505	3.427	0.33
Chr1L	9712036	9712537	L_prox_lo_119	proximal_low_conf	0.554	1.656	2.15	1.03	0.897	0.289	0.954	0	1.97	0	6.019	3.713	4.284
Chr1L	9712320	9712821	L_prox_hi_120	proximal_high_conf	0.444	2.069	2.437	0.686	1.921	0.434	0.763	0	5.911	8.334	6.32	6.854	5.932
Chr1L	9714451	9714952	L_dist_noab_121	distal_noab_high	0.222	0.414	0.717	0	0.384	0.289	0.381	8.106	5.911	0	3.01	3.427	1.318
Chr1L	9715237	9715738	L_dist_lo_122	distal_low_conf	0.111	1.035	1.29	0.686	0.64	0.578	0.572	0	0	8.334	3.01	1.999	0.33
Chr1L	9715797	9716298	L_dist_noab_123	distal_noab_high	0.222	0.621	0.717	0	0.512	0.145	0.763	0	0	0	1.505	2.285	0.989
Chr1L	9722787	9723288	L_dist_noab_124	distal_noab_high	0.665	0.207	0.43	0.343	1.025	0.289	0.763	4.053	0	8.334	2.408	1.428	1.318
Chr1L	9736393	9736894	L_prox_noab_125	proximal_noab_high	0.887	0.828	1.147	2.059	0.64	0.289	0.191	4.053	0	0	1.204	1.999	1.648
Chr1L	9737457	9737958	L_prox_lo_126	proximal_low_conf	0.111	2.276	1.29	0.686	0.256	0.434	0.572	0	0	0	3.01	3.141	3.625
Chr1L	9737936	9738437	L_prox_lo_127	proximal_low_conf	0.222	0.621	1.72	0.343	0.64	0.723	0.572	4.053	0	0	4.213	5.141	2.307
Chr1L	9862551	9863052	L_prox_hi_128	proximal_high_conf	0.444	3.311	4.731	1.716	1.281	0.578	1.144	8.106	5.911	0	6.621	3.998	6.261
Chr1L	9862909	9863410	L_prox_hi_129	proximal_high_conf	0.222	3.725	3.584	1.373	1.281	1.301	1.526	4.053	1.97	0	4.815	3.998	4.943
Chr1L	9880659	9881160	L_dist_noab_130	distal_noab_high	0.998	0.414	0.717	0.343	0.768	0.434	0.572	0	0	0	1.505	1.428	1.648
Chr1L	9909177	9909678	L_dist_lo_131	distal_low_conf	0.554	2.069	2.007	0.686	0.384	1.59	3.242	0	0	0	2.408	2.856	0.989
Chr1L	9909735	9910236	L_dist_hi_132	distal_high_conf	0.554	1.863	1.577	0.343	1.281	1.734	1.716	0	0	0	2.408	1.428	1.977
Chr1L	9912772	9913273	L_dist_noab_133	distal_noab_high	0.444	0.828	0.143	0.686	0.768	0.578	1.144	8.106	0	16.667	1.505	1.714	1.318
Chr1L	9937881	9938382	L_dist_noab_134	distal_noab_high	0.554	0.414	0.717	0.343	0.768	0.723	0.191	12.158	1.97	0	2.107	1.428	2.307
Chr1L	9954845	9955346	L_dist_noab_135	distal_noab_high	0.665	0.621	1.29	0.343	0.512	0.867	1.907	0	0	0	1.505	3.998	1.318
Chr1L	9957390	9957891	L_dist_hi_136	distal_high_conf	0.665	2.276	2.15	2.059	0.768	2.601	4.577	4.053	3.941	0	6.922	6.854	2.966
Chr1L	9959680	9960181	L_dist_hi_137	distal_high_conf	0.887	3.518	3.584	2.403	1.025	3.179	5.721	8.106	1.97	0	8.427	9.996	5.602
Chr1L	9961477	9961978	L_dist_lo_138	distal_low_conf	0.554	3.104	2.724	2.059	0.64	2.89	3.051	0	0	8.334	2.107	3.141	0.659
Chr1L	9970867	9971368	L_dist_noab_139	distal_noab_high	0.333	0.828	1.147	0.343	0.384	1.012	2.479	0	0	0	2.408	1.714	0.659
Chr1L	9984788	9985289	L_dist_lo_140	distal_low_conf	0.554	4.139	2.15	1.03	0.897	3.468	3.814	0	0	0	2.408	3.141	0.659
Chr1L	9988121	9988622	L_dist_lo_141	distal_low_conf	0.444	1.449	1.433	1.03	0.768	1.879	3.433	8.106	0	0	1.505	1.999	0
Chr1L	9990349	9990850	L_dist_hi_142	distal_high_conf	0.887	3.104	5.447	2.403	1.153	2.746	6.294	0	3.941	8.334	9.33	8.282	6.591
Chr1L	9992980	9993481	L_dist_noab_143	distal_noab_high	0.444	1.242	1.147	0.686	0.256	0.723	1.716	0	0	0	1.204	1.142	0.659
Chr1L	9994816	9995317	L_dist_lo_144	distal_low_conf	0.665	3.311	4.874	1.716	1.281	1.879	3.433	0	5.911	0	4.514	7.14	1.318
Chr1L	9998067	9998568	L_prox_lo_145	proximal_low_conf	0.444	2.69	2.007	0.343	0.768	1.301	3.051	0	5.911	0	8.728	11.709	9.557
Chr1L	9999041	9999542	L_dist_hi_146	distal_high_conf	0.111	2.276	2.007	3.089	0.897	2.312	2.479	0	3.941	0	4.815	4.855	1.318
Chr1L	9999998	10000499	L_dist_lo_147	distal_low_conf	0.998	1.863	2.437	3.089	1.921	1.734	5.34	0	0	0	5.417	3.427	2.966
Chr1L	10000257	10000758	L_dist_lo_148	distal_low_conf	0.998	2.069	2.58	3.089	1.537	1.301	4.005	0	1.97	0	4.213	1.999	2.636
Chr1L	10000632	10001133	L_dist_lo_149	distal_low_conf	0.665	3.104	2.437	0.686	0.64	1.445	3.624	0	5.911	0	2.408	1.714	1.318
Chr1L	10002392	10002893	L_dist_hi_150	distal_high_conf	0.554	4.139	3.87	5.492	1.025	3.757	5.912	0	1.97	0	6.621	7.14	6.591
Chr1L	10004409	10004910	L_dist_lo_151	distal_low_conf	0.776	5.174	6.021	1.373	1.537	4.913	9.154	4.053	1.97	0	4.213	3.998	3.295
Chr1L	10007781	10008282	L_dist_noab_152	distal_noab_high	0.665	1.242	1.29	1.03	0.897	2.023	3.433	0	0	0	2.408	3.713	1.977
Chr1L	10040760	10041261	L_dist_noab_153	distal_noab_high	0.444	0	0.287	0.686	0.128	0.434	0.763	0	0	0	2.107	1.999	2.307
Chr1L	10052525	10053026	L_dist_lo_154	distal_low_conf	0.111	0.207	0.43	1.716	0.128	0.434	0	0	0	0	1.204	0.571	1.318
Chr1L	10081471	10081972	L_prox_hi_155	proximal_high_conf	0.333	2.897	1.72	2.059	1.025	1.734	1.144	0	3.941	0	4.514	6.283	8.239
Chr1L	10090629	10091130	L_dist_noab_156	distal_noab_high	0.776	0.621	0.717	0.343	0.256	1.156	0.572	0	0	0	1.505	3.141	0.989
Chr1L	10093272	10093773	L_dist_noab_157	distal_noab_high	0.554	0.621	0.143	1.03	0.512	0.434	0.763	0	0	8.334	0.602	1.714	2.636
Chr1L	10095385	10095886	L_prox_hi_158	proximal_high_conf	0.333	2.276	3.01	2.059	1.409	1.156	1.716	0	0	0	5.116	3.141	3.625
Chr1L	10097135	10097636	L_dist_lo_159	distal_low_conf	0.111	1.035	1.577	1.373	1.153	0.723	0.572	0	5.911	0	3.912	2.856	0.989
Chr1L	10097644	10098145	L_dist_hi_160	distal_high_conf	0.222	1.242	2.15	2.059	1.281	0.434	0.572	0	13.793	0	1.505	2.856	1.318
Chr1L	10121990	10122491	L_dist_hi_161	distal_high_conf	0.111	2.483	5.017	3.089	0.64	4.48	5.34	8.106	5.911	0	9.33	10.281	5.932
Chr1L	10127281	10127782	L_dist_lo_162	distal_low_conf	0.222	0.828	0.86	0.686	0.897	1.156	0.954	0	1.97	0	2.408	2.285	0.989
Chr1L	10129487	10129988	L_dist_noab_163	distal_noab_high	0.444	0.621	0.717	1.373	1.025	0.578	0.763	0	0	0	1.204	2.57	0.989
Chr1L	10134839	10135340	L_prox_hi_164	proximal_high_conf	0.554	2.276	1.864	1.716	0.897	2.168	1.144	8.106	0	0	3.612	3.998	2.966
Chr1L	10136131	10136632	L_dist_lo_165	distal_low_conf	0.111	1.449	0.43	0.686	0.384	0.723	1.526	0	0	0	2.709	1.999	0.989
Chr1L	10141599	10142100	L_dist_noab_166	distal_noab_high	0.333	0.414	0.717	0	0.512	1.156	0.954	4.053	1.97	0	1.806	1.714	2.307
Chr1L	10142937	10143438	L_dist_lo_167	distal_low_conf	0.333	1.035	0.86	1.03	0.384	1.879	1.526	0	5.911	0	9.33	5.712	3.295
Chr1L	10144343	10144844	L_dist_noab_168	distal_noab_high	0.333	0	0.43	0.343	0.384	0.867	0.572	0	1.97	0	0.903	4.284	0.659
Chr1L	10154072	10154573	L_dist_noab_169	distal_noab_high	0.665	0.414	0.717	0.686	0.128	0.867	0.572	0	5.911	0	2.709	2.57	1.318
Chr1L	10208926	10209427	L_prox_hi_170	proximal_high_conf	0.222	2.069	4.014	1.373	1.025	1.301	1.335	0	1.97	0	4.514	3.141	2.636
Chr1L	10209219	10209720	L_prox_hi_171	proximal_high_conf	0.333	2.069	2.867	0.686	1.025	0.867	1.144	0	1.97	0	1.505	4.284	2.307
Chr1L	10209730	10210231	L_prox_lo_172	proximal_low_conf	0.222	2.276	1.147	0.343	0.897	1.012	1.144	4.053	3.941	0	3.612	3.427	5.932
Chr1L	10218609	10219110	L_prox_lo_173	proximal_low_conf	0	0	0.287	0	0.128	0.578	0.572	0	0	0	2.709	3.427	1.318
Chr1L	10233018	10233519	L_prox_noab_174	proximal_noab_high	0.333	0.414	0.86	0.343	0.384	0	0	0	1.97	0	1.806	2.57	1.648
Chr1L	10234277	10234778	L_prox_lo_175	proximal_low_conf	0.111	1.035	1.003	0.686	0.256	0.289	0	0	0	0	0.903	1.999	0.659
Chr1L	10329891	10330392	L_prox_noab_176	proximal_noab_high	0.998	1.449	1.433	0	0.897	0.434	0.954	8.106	0	0	2.709	0.857	2.307
Chr1L	10342240	10342741	L_dist_noab_177	distal_noab_high	0.776	0.207	0.573	0.686	0.64	0.578	1.144	0	1.97	0	2.107	1.714	0.33
Chr1L	10381239	10381740	L_prox_lo_178	proximal_low_conf	0.887	3.932	4.014	0.686	1.025	0.723	1.144	8.106	1.97	0	6.621	8.853	9.886
Chr1L	10409197	10409698	L_prox_lo_179	proximal_low_conf	0.333	1.035	1.864	0.343	0.64	1.156	1.526	0	1.97	0	1.806	0.571	0.989
Chr1L	10435896	10436397	L_dist_noab_180	distal_noab_high	0.776	0.828	1.29	1.373	0.512	0.867	1.144	0	3.941	0	2.709	2.285	0.659
Chr1L	10451186	10451687	L_dist_lo_181	distal_low_conf	0.665	3.104	3.01	0.686	0.768	3.035	4.386	4.053	1.97	0	7.223	5.997	3.954
Chr1L	10453393	10453894	L_prox_noab_182	proximal_noab_high	0.665	1.035	1.577	1.716	1.153	2.601	3.242	4.053	1.97	0	6.019	5.997	4.614
Chr1L	10453849	10454350	L_prox_noab_183	proximal_noab_high	0.333	0.414	1.003	0.343	0.256	0.723	1.716	0	0	0	1.505	2.285	1.977
Chr1L	10454591	10455092	L_dist_noab_184	distal_noab_high	0.554	0.828	1.147	1.373	0.256	0.578	1.526	0	0	0	1.806	3.427	0.659
Chr1L	10461147	10461648	L_dist_noab_185	distal_noab_high	0.333	0.414	0.143	0.343	0.768	0.578	0.572	0	1.97	0	0.903	1.428	0.989
Chr1L	10477221	10477722	L_dist_noab_186	distal_noab_high	0.333	0.828	0.43	0	0.128	0.434	0.572	0	0	0	1.806	0.857	0.33
Chr1L	10482424	10482925	L_dist_noab_187	distal_noab_high	0.665	0	0.43	0.343	0.384	1.012	0.763	0	0	0	1.505	1.714	2.966
Chr1L	10485551	10486052	L_dist_noab_188	distal_noab_high	0.665	0.621	0.717	1.03	0.256	1.445	0.572	0	0	0	2.107	1.714	2.307
Chr1L	10488100	10488601	L_dist_noab_189	distal_noab_high	0.111	0.207	0.143	0	0.128	0.434	0.381	0	0	0	2.408	0.571	0.989
Chr1L	10499867	10500368	L_prox_hi_190	proximal_high_conf	0.111	1.449	2.007	1.03	1.153	1.445	2.479	8.106	3.941	0	6.621	4.855	2.966
Chr1L	10500240	10500741	L_prox_hi_191	proximal_high_conf	0.333	2.897	2.437	1.03	1.153	1.445	1.335	0	1.97	0	3.912	3.998	2.307
Chr1L	10503619	10504120	L_dist_noab_192	distal_noab_high	0.554	0.207	0.717	0.686	0.128	0.289	0.381	4.053	1.97	0	0.903	1.999	1.648
Chr1L	10574589	10575090	L_dist_lo_193	distal_low_conf	0.222	0.414	0.573	0.343	0.768	0.145	0.572	4.053	0	0	0.301	2.285	0.989
Chr1L	10648876	10649377	L_dist_noab_194	distal_noab_high	0.444	0.414	0.143	0.343	0.384	0.289	0.191	0	0	0	0.903	1.428	1.648
Chr1L	10753457	10753958	L_dist_noab_195	distal_noab_high	0.554	0.828	0.573	1.373	0.768	0.289	0.763	0	1.97	0	0.903	1.142	2.307
Chr1L	10757470	10757971	L_dist_lo_196	distal_low_conf	0.111	0.414	0.43	0	0.64	0.289	0.191	0	0	0	0.903	0.571	1.648
Chr1L	10793546	10794047	L_dist_noab_197	distal_noab_high	0.333	0.414	0.287	0	0.128	0.289	0.381	0	0	0	2.107	0.857	1.648
Chr1L	10809490	10809991	L_prox_hi_198	proximal_high_conf	0.444	1.656	2.007	1.716	1.153	2.023	1.907	8.106	3.941	8.334	12.339	13.137	8.568
Chr1L	10866345	10866846	L_prox_noab_199	proximal_noab_high	0.554	0.621	1.003	1.373	0.768	0.145	0.381	8.106	0	0	1.806	1.714	1.977
Chr1L	10907882	10908383	L_prox_noab_200	proximal_noab_high	0.665	1.035	0.573	1.03	0.897	0.578	1.907	0	0	0	1.505	1.428	2.307
Chr1L	10908441	10908942	L_prox_hi_201	proximal_high_conf	0.222	1.449	1.003	1.373	0.768	0.723	0.763	0	3.941	0	2.107	3.427	1.318
Chr1L	10911590	10912091	L_dist_noab_202	distal_noab_high	0.222	0.207	0.287	0	0.256	0.434	0	0	0	0	1.505	2.285	1.977
Chr1L	10912649	10913150	L_dist_hi_203	distal_high_conf	0.554	1.449	0.86	1.373	1.409	0.434	0.572	4.053	0	0	2.408	1.999	1.977
Chr1L	10937070	10937571	L_prox_noab_204	proximal_noab_high	0.222	0.207	0.43	0.686	0.256	1.012	0.191	0	0	8.334	1.806	0.857	0.659
Chr1L	10980092	10980593	L_dist_noab_205	distal_noab_high	0.333	0.207	0.717	1.03	0.384	0.289	0.191	4.053	0	0	1.204	2.285	0.33
Chr1L	10984215	10984716	L_dist_lo_206	distal_low_conf	0.111	1.449	0.717	0.343	0.256	1.156	0.381	0	3.941	0	1.505	1.999	0.659
Chr1L	10984915	10985416	L_dist_noab_207	distal_noab_high	0.444	0.414	0.717	1.03	0.64	1.156	0.381	0	1.97	0	1.505	1.428	0.989
Chr1L	10992387	10992888	L_dist_lo_208	distal_low_conf	0.333	0.828	1.003	1.03	0.64	0.867	1.716	0	1.97	0	3.01	4.284	1.318
Chr1L	10992773	10993274	L_dist_noab_209	distal_noab_high	0.665	1.035	1.147	1.03	0.384	0.867	1.716	0	0	0	2.408	3.998	2.636
Chr1L	10998772	10999273	L_dist_noab_210	distal_noab_high	0.444	0.828	1.864	0.343	0.384	2.601	5.912	0	0	0	7.223	5.141	1.318
Chr1L	11000408	11000909	L_dist_noab_211	distal_noab_high	0.554	1.035	1.003	0.343	0.384	2.023	3.433	0	1.97	0	2.408	2.285	0.659
Chr1L	11000909	11001410	L_dist_lo_212	distal_low_conf	0.111	1.035	0.287	0.343	0.512	1.301	2.098	4.053	5.911	0	2.107	5.997	1.318
Chr1L	11003496	11003997	L_dist_noab_213	distal_noab_high	0.998	0	0.43	0.343	0.256	0.723	0.572	0	1.97	0	3.912	3.427	1.977
Chr1L	11005091	11005592	L_dist_lo_214	distal_low_conf	0.222	3.104	2.007	0.686	0.512	1.445	4.577	0	1.97	0	4.514	5.997	2.636
Chr1L	11005335	11005836	L_dist_lo_215	distal_low_conf	0	2.276	1.72	0.343	0.128	1.301	3.051	0	0	0	3.311	4.569	2.636
Chr1L	11006459	11006960	L_prox_hi_216	proximal_high_conf	0.554	3.518	3.44	1.373	1.281	3.902	4.768	0	0	0	11.135	12.28	2.966
Chr1L	11007650	11008151	L_prox_lo_217	proximal_low_conf	0.222	4.139	3.87	0.343	0.384	2.746	2.67	0	1.97	8.334	14.747	15.136	13.511
Chr1L	11014619	11015120	L_dist_noab_218	distal_noab_high	0.444	1.242	0.43	0.686	0.512	0.578	0	0	3.941	0	2.408	2.285	0.989
Chr1L	11067769	11068270	L_dist_noab_219	distal_noab_high	0.554	1.035	0.573	0	0.256	0.578	2.098	0	3.941	8.334	1.505	1.714	0.33
Chr1L	11079128	11079629	L_dist_noab_220	distal_noab_high	0.444	0.414	0.287	1.373	0.64	2.023	2.289	0	0	0	2.107	3.141	0.989
Chr1L	11085608	11086109	L_dist_lo_221	distal_low_conf	0.333	1.242	1.29	1.03	0.768	2.601	2.861	0	0	0	2.709	2.285	0.989
Chr1L	11094098	11094599	L_dist_lo_222	distal_low_conf	0	0.621	0.43	1.03	0.128	1.301	0.954	0	0	0	0.602	2.856	1.648
Chr1L	11096882	11097383	L_dist_lo_223	distal_low_conf	0.111	1.449	1.147	0	0.256	1.301	0.763	0	0	0	2.709	2.57	1.318
Chr1L	11097905	11098406	L_dist_lo_224	distal_low_conf	0.222	1.035	1.147	0.686	0.512	1.012	3.051	0	0	0	1.204	2.57	0.33
Chr1L	11100350	11100851	L_dist_noab_225	distal_noab_high	0.554	1.656	0.43	0.343	0.256	2.601	3.242	0	1.97	0	3.01	1.428	0.989
Chr1L	11101991	11102492	L_dist_lo_226	distal_low_conf	0.222	1.242	0.43	0.686	0.512	1.301	3.242	0	1.97	0	3.311	2.285	1.648
Chr1L	11103093	11103594	L_dist_lo_227	distal_low_conf	0.222	2.69	1.72	1.373	1.025	1.879	6.103	8.106	0	0	4.213	5.141	0.33
Chr1L	11105953	11106454	L_dist_hi_228	distal_high_conf	0.444	4.346	2.437	1.716	1.281	3.613	7.819	0	1.97	0	5.116	8.282	2.636
Chr1L	11106221	11106722	L_dist_hi_229	distal_high_conf	0.554	4.346	3.297	1.716	1.281	4.335	8.582	4.053	1.97	0	6.621	12.852	2.966
Chr1L	11108800	11109301	L_dist_hi_230	distal_high_conf	0.444	3.311	3.44	1.716	0.512	3.902	4.386	4.053	1.97	0	7.223	7.711	1.977
Chr1L	11110208	11110709	L_dist_lo_231	distal_low_conf	0.222	0.828	2.437	1.03	0.512	2.746	3.624	0	0	0	3.612	1.999	0.659
Chr1L	11110757	11111258	L_dist_lo_232	distal_low_conf	0.998	2.897	3.44	1.373	1.153	3.757	6.866	0	3.941	0	2.408	6.283	2.307
Chr1L	11111516	11112017	L_dist_lo_233	distal_low_conf	0.665	4.553	2.007	1.373	0.64	2.168	3.433	0	0	0	1.806	1.142	1.977
Chr1L	11112038	11112539	L_dist_hi_234	distal_high_conf	0.776	4.346	3.01	2.746	0.897	6.792	8.392	4.053	0	0	3.612	4.284	2.636
Chr1L	11114895	11115396	L_dist_hi_235	distal_high_conf	0.222	5.381	3.584	3.089	1.153	5.925	9.345	4.053	1.97	8.334	8.427	12.28	7.909
Chr1L	11116667	11117168	L_dist_lo_236	distal_low_conf	0.444	2.483	3.154	1.373	0.512	4.191	5.721	0	0	0	2.107	0.857	0.989
Chr1L	11118809	11119310	L_prox_hi_237	proximal_high_conf	0.333	1.656	2.437	1.716	1.281	2.601	4.005	4.053	5.911	8.334	10.534	16.279	5.602
Chr1L	11119555	11120056	L_prox_noab_238	proximal_noab_high	0.665	1.242	1.147	1.03	0.512	3.613	3.051	0	0	0	3.01	4.284	0.659
Chr1L	11120211	11120712	L_prox_hi_239	proximal_high_conf	0.444	2.69	1.147	1.373	1.153	2.601	4.005	8.106	0	8.334	9.029	7.14	2.307
Chr1L	11121395	11121896	L_prox_noab_240	proximal_noab_high	0.998	0.828	0.573	1.03	0.512	1.879	3.051	0	1.97	0	5.417	6.854	1.648
Chr1L	11122229	11122730	L_prox_noab_241	proximal_noab_high	0.222	0.414	0.143	0.343	0	0.578	1.526	0	0	0	2.709	5.141	0.659
Chr1L	11122624	11123125	L_prox_noab_242	proximal_noab_high	0.665	0.621	0	0.686	0.128	1.445	1.526	0	0	0	3.612	1.999	0.989
Chr1L	11123375	11123876	L_dist_noab_243	distal_noab_high	1.109	0.621	1.003	0	0.768	1.879	2.479	0	0	0	4.213	4.569	0.659
Chr1L	11124031	11124532	L_dist_noab_244	distal_noab_high	0.554	1.035	0.717	0.343	1.025	2.023	2.098	0	0	0	3.01	3.998	1.318
Chr1L	11125116	11125617	L_dist_lo_245	distal_low_conf	0.444	1.242	0.86	1.03	0.64	2.457	2.098	0	0	0	3.311	5.712	1.318
Chr1L	11126393	11126894	L_dist_noab_246	distal_noab_high	1.109	0.621	1.147	1.716	0	1.734	3.814	0	0	0	8.427	10.281	4.943
Chr1L	11127247	11127748	L_dist_lo_247	distal_low_conf	0.333	0.414	1.433	1.03	0.768	2.168	1.716	0	0	0	2.709	3.141	0.33
Chr1L	11128401	11128902	L_dist_noab_248	distal_noab_high	1.109	1.242	2.15	1.716	0.128	1.301	2.289	0	3.941	0	5.718	4.284	1.648
Chr1L	11128851	11129352	L_dist_hi_249	distal_high_conf	0.665	1.656	1.577	1.716	0.768	1.445	2.098	0	0	0	5.718	4.569	2.307
Chr1L	11129904	11130405	L_dist_noab_250	distal_noab_high	0.444	0.621	0.717	1.03	0.384	1.301	1.144	0	0	0	2.107	2.57	0.659
Chr1L	11130511	11131012	L_dist_noab_251	distal_noab_high	0.554	0.828	0.573	0	0.512	1.012	0.381	0	0	0	2.709	3.141	1.648
Chr1L	11133823	11134324	L_dist_noab_252	distal_noab_high	0.444	1.242	0.573	0	0.384	0.145	0.381	0	0	0	1.806	2.57	0.989
Chr1L	11187415	11187916	L_prox_hi_253	proximal_high_conf	0.444	2.276	1.577	0.686	1.537	1.156	1.144	0	5.911	8.334	3.311	2.285	2.307
Chr1L	11204877	11205378	L_dist_noab_254	distal_noab_high	0.665	0.207	0.287	1.373	0.512	0.434	0.191	4.053	0	0	1.505	1.142	1.318
Chr1L	11476992	11477493	L_dist_noab_255	distal_noab_high	0.333	0.621	0.86	0.343	0.768	0.289	0.954	0	0	0	0.903	0.571	1.648
Chr1L	11885677	11886178	L_dist_hi_256	distal_high_conf	0.444	1.863	1.433	0.343	1.153	0.867	0.381	4.053	3.941	8.334	5.417	1.999	4.943
Chr1L	11887063	11887564	L_dist_lo_257	distal_low_conf	0.222	0.414	0.573	0	1.025	0.289	0.381	4.053	3.941	0	1.505	1.999	1.648
Chr1L	11890494	11890995	L_dist_noab_258	distal_noab_high	0.887	1.035	0.43	0.686	0.128	0.723	0.954	0	0	0	1.806	3.713	1.318
Chr1L	11950922	11951423	L_dist_noab_259	distal_noab_high	0.222	0.207	0	0	0.768	0.289	0.381	0	0	0	0.301	1.999	0.989
Chr1L	12082572	12083073	L_dist_lo_260	distal_low_conf	0.111	0.207	0.287	0.343	0.64	0.145	0.381	0	0	0	2.408	0.857	0.659
Chr1L	12083718	12084219	L_prox_lo_261	proximal_low_conf	0	1.035	0.43	0.686	1.153	0.578	0.954	0	5.911	0	2.408	2.285	3.295
Chr1L	12119444	12119945	L_dist_noab_262	distal_noab_high	0.222	0.207	0.143	0.343	0.512	0.289	0.763	0	1.97	0	2.107	1.714	1.648
Chr1L	12130662	12131163	L_dist_lo_263	distal_low_conf	0.665	2.276	2.58	0.343	1.281	3.179	4.005	4.053	1.97	0	4.213	4.284	3.954
Chr1L	12191669	12192170	L_dist_noab_264	distal_noab_high	0.444	0.207	0.43	0.686	0.512	0.723	0.954	0	0	0	3.01	4.569	1.648
Chr1L	12247174	12247675	L_dist_noab_265	distal_noab_high	0.554	0.207	0.573	0	0.256	0.145	0.381	0	1.97	0	1.505	0.571	0.989
Chr1L	12267052	12267553	L_dist_noab_266	distal_noab_high	0.222	0.414	0.43	0.343	0.768	1.156	1.144	0	0	0	1.505	0.857	0.33
Chr1L	12272354	12272855	L_prox_noab_267	proximal_noab_high	0.665	0.828	2.724	1.03	0.897	2.023	3.051	0	1.97	0	4.815	2.856	2.966
Chr1L	12278528	12279029	L_dist_lo_268	distal_low_conf	0.333	0.414	2.15	1.373	0.384	0.867	0.572	0	1.97	0	2.107	3.141	0.33
Chr1L	12304052	12304553	L_dist_noab_269	distal_noab_high	0.444	0.414	1.003	1.03	0.384	0.723	0.191	0	0	0	2.408	2.57	0.33
Chr1L	12360228	12360729	L_dist_lo_270	distal_low_conf	0.222	0.828	0.287	1.03	0.512	0.145	0.191	0	1.97	0	2.408	0.857	1.318
Chr1L	12366720	12367221	L_dist_noab_271	distal_noab_high	0.444	0.414	0.43	0.343	0.384	0.434	0.763	0	0	0	0.903	1.714	0.659
Chr1L	12392010	12392511	L_dist_noab_272	distal_noab_high	0.444	0.414	1.003	0.686	1.281	1.156	0.763	0	0	0	1.505	1.428	2.307
Chr1L	12417414	12417915	L_dist_lo_273	distal_low_conf	0.333	0.207	1.003	1.716	1.025	0.723	0.763	4.053	0	0	0.903	2.285	0.659
Chr1L	12418649	12419150	L_dist_noab_274	distal_noab_high	0.333	0.414	0.573	0	0	0.434	0	0	0	0	3.612	1.142	1.318
Chr1L	12420541	12421042	L_dist_lo_275	distal_low_conf	0.444	1.035	1.433	1.03	0.64	0.434	0.191	0	0	0	2.107	2.57	0.33
Chr1L	12421704	12422205	L_dist_hi_276	distal_high_conf	0.444	1.035	1.864	1.03	0.897	1.012	1.716	0	0	0	2.709	3.998	2.307
Chr1L	12422605	12423106	L_prox_hi_277	proximal_high_conf	0.444	2.069	3.297	2.746	1.025	2.601	2.098	0	1.97	0	3.912	1.999	2.307
Chr1L	12422821	12423322	L_prox_hi_278	proximal_high_conf	0.444	2.276	5.161	2.746	0.768	4.046	3.051	4.053	0	0	6.32	2.856	2.307
Chr1L	12423629	12424130	L_prox_hi_279	proximal_high_conf	0.444	6.208	5.734	2.059	1.409	3.757	3.814	8.106	7.882	0	12.941	19.135	16.807
Chr1L	12425303	12425804	L_dist_lo_280	distal_low_conf	0.111	0.621	0.717	0.686	0.64	0.867	1.526	0	0	0	0.301	2.856	3.295
Chr1L	12426921	12427422	L_dist_hi_281	distal_high_conf	0.444	3.518	1.29	1.716	0.64	2.457	3.433	0	1.97	0	2.408	2.285	1.977
Chr1L	12486902	12487403	L_prox_lo_282	proximal_low_conf	0.222	1.035	1.147	0	0.512	0.434	0.191	0	5.911	0	2.107	2.856	2.966
Chr1L	12487237	12487738	L_prox_noab_283	proximal_noab_high	0.665	1.449	2.294	0.343	0.768	0.867	0.381	0	3.941	0	2.107	2.856	4.284
Chr1L	12551693	12552194	L_dist_noab_284	distal_noab_high	0.333	0.828	0.573	0.343	0.512	1.879	0.572	0	0	0	1.806	0.857	2.636
Chr1L	12598225	12598726	L_dist_lo_285	distal_low_conf	0.222	0.621	0.717	0	0.768	0.145	0.191	0	0	0	0.903	1.428	1.318
Chr1L	12698072	12698573	L_dist_noab_286	distal_noab_high	1.22	0.414	0.143	0.686	0.512	0.145	0.191	0	0	0	2.408	1.142	1.318
Chr1L	12704153	12704654	L_dist_noab_287	distal_noab_high	0.444	0.621	0.573	0.343	0.128	0.434	0.381	4.053	0	0	3.01	2.856	1.977
Chr1L	12788534	12789035	L_prox_noab_288	proximal_noab_high	0.444	0.828	1.29	0.686	0.128	2.457	0.763	4.053	0	0	2.408	1.999	1.977
Chr1L	12789577	12790078	L_prox_hi_289	proximal_high_conf	0.998	3.518	5.591	2.403	2.305	3.324	5.149	16.211	7.882	8.334	9.631	8.853	10.875
Chr1L	12820575	12821076	L_dist_noab_290	distal_noab_high	0.554	0.621	0.43	0.343	0.512	0.723	0.763	0	0	0	2.408	2.285	1.977
Chr1L	12840326	12840827	L_dist_noab_291	distal_noab_high	0.554	1.656	0.86	1.03	0.512	1.445	0.572	0	0	0	2.709	1.714	0.33
Chr1L	12936777	12937278	L_dist_noab_292	distal_noab_high	0.665	0.207	0.573	0	0.512	0.867	0.763	0	0	0	1.204	1.142	1.318
Chr1L	12991956	12992457	L_prox_noab_293	proximal_noab_high	0.776	2.069	1.72	1.373	0.384	0.867	1.144	0	0	0	6.019	7.425	6.261
Chr1L	13041380	13041881	L_prox_lo_294	proximal_low_conf	0.111	1.656	1.003	0.686	0.897	0.723	0.381	4.053	3.941	16.667	6.019	5.712	4.284
Chr1L	13087510	13088011	L_dist_lo_295	distal_low_conf	0	0.828	0.573	0.686	0.897	0.145	0.381	0	0	0	2.107	1.428	0.33
Chr1L	13131176	13131677	L_dist_hi_296	distal_high_conf	0.333	1.242	2.007	1.716	0.897	0.723	1.144	0	0	0	5.417	3.427	2.307
Chr1L	13249581	13250082	L_dist_noab_297	distal_noab_high	0.554	0.414	0.717	0.686	0.64	0.434	0.381	0	3.941	0	1.806	2.285	1.318
Chr1L	13310802	13311303	L_dist_noab_298	distal_noab_high	0.222	0.414	0.287	0.343	0.897	0.434	0.191	0	0	0	0.903	1.714	1.977
Chr1L	13390484	13390985	L_prox_noab_299	proximal_noab_high	0.444	0.207	0.573	0	0.384	0.289	0.191	8.106	0	0	2.408	2.285	0.989
Chr1L	13550561	13551062	L_dist_lo_300	distal_low_conf	0.444	2.276	1.72	0.686	0.64	2.601	3.051	4.053	0	0	1.806	2.285	1.977
Chr1L	13554574	13555075	L_dist_noab_301	distal_noab_high	0.665	0.414	0.43	0.686	0.512	1.012	1.335	0	0	0	1.505	1.999	0.659
Chr1L	13639372	13639873	L_dist_lo_302	distal_low_conf	0.222	0	0.573	0.686	0.768	0.289	0.954	0	0	0	1.806	0.571	0.33
Chr1L	14214512	14215013	L_prox_hi_303	proximal_high_conf	0.444	2.069	2.007	2.403	0.64	1.59	1.335	0	0	0	4.213	4.855	2.966
Chr1L	14222745	14223246	L_dist_lo_304	distal_low_conf	0.111	0.414	1.003	0.343	0.512	0.434	0.954	0	0	0	0.903	1.999	0.659
Chr1L	14231746	14232247	L_dist_lo_305	distal_low_conf	0.444	1.449	1.864	0.686	1.409	0.578	0	0	0	0	1.806	2.856	0
Chr1L	14242792	14243293	L_prox_lo_306	proximal_low_conf	0.222	0.828	1.147	1.03	0.512	0.289	0.572	8.106	5.911	0	1.505	2.57	2.307
Chr1L	14288173	14288674	L_prox_hi_307	proximal_high_conf	0.776	3.311	3.297	1.716	0.897	1.734	1.907	0	1.97	0	3.311	3.998	3.954
Chr1L	14481427	14481928	L_dist_noab_308	distal_noab_high	0.665	0.207	0.86	0.343	0.128	0.867	0.381	0	0	0	2.709	2.285	0.989
Chr1L	14497725	14498226	L_prox_lo_309	proximal_low_conf	0.222	1.656	1.433	0.686	0.512	1.012	2.479	0	1.97	0	3.612	1.142	1.977
Chr1L	14498599	14499100	L_prox_hi_310	proximal_high_conf	0.444	1.656	2.437	1.373	0.64	0.578	1.526	0	3.941	0	5.116	5.997	5.602
Chr1L	14517707	14518208	L_dist_lo_311	distal_low_conf	0.111	0.414	0.143	1.03	0.512	0.578	0.191	0	0	0	1.806	1.428	0.989
Chr1L	14554267	14554768	L_prox_lo_312	proximal_low_conf	0.111	0.828	1.147	1.373	0.768	0.145	0.954	4.053	7.882	8.334	5.718	7.14	7.25
Chr1L	14582160	14582661	L_prox_lo_313	proximal_low_conf	0	1.656	0.717	0.686	1.025	1.012	0.572	4.053	0	0	4.815	4.855	5.932
Chr1L	14585170	14585671	L_dist_noab_314	distal_noab_high	0.887	0.621	1.003	0.343	1.281	0.578	0.763	20.264	1.97	0	3.612	6.569	6.261
Chr1L	14643544	14644045	L_dist_noab_315	distal_noab_high	1.109	1.449	0.287	0.343	1.025	0.867	0.954	0	0	0	1.806	2.57	0.659
Chr1L	14678769	14679270	L_prox_noab_316	proximal_noab_high	0.444	0.621	0.86	1.03	0.384	0.434	0.954	16.211	7.882	0	6.922	7.997	6.591
Chr1L	14849552	14850053	L_dist_noab_317	distal_noab_high	0.554	0.207	0.717	1.03	0.64	0.723	0.954	0	0	0	3.01	3.427	2.307
Chr1L	15257345	15257846	L_dist_lo_318	distal_low_conf	0.222	1.242	1.147	0.686	0.384	0.578	0.763	0	0	0	0.301	1.999	0.989
Chr1L	15714930	15715431	L_dist_noab_319	distal_noab_high	0.554	1.242	0.86	1.03	0.384	1.156	1.716	0	0	0	1.505	1.142	1.318
Chr1L	15823467	15823968	L_dist_noab_320	distal_noab_high	0.444	0.621	0.143	1.03	1.153	0.578	1.144	0	0	0	2.709	0.857	0.659
Chr1L	15947692	15948193	L_dist_noab_321	distal_noab_high	0.444	0.621	0.86	1.716	0.512	0.289	0.191	0	1.97	0	2.408	1.999	1.977
Chr1L	15949691	15950192	L_dist_noab_322	distal_noab_high	0.554	0	0.86	0.343	0.384	0.289	0.954	0	1.97	0	1.204	1.714	1.318
Chr1L	15960595	15961096	L_dist_hi_323	distal_high_conf	0.222	1.449	1.147	1.716	0.768	0.578	0.954	0	0	0	1.505	2.57	1.648
Chr1L	16003139	16003640	L_dist_noab_324	distal_noab_high	0.222	0.207	0.43	0.686	0.512	0.145	0.381	0	0	0	2.107	1.142	1.318
Chr1L	16658170	16658671	L_dist_lo_325	distal_low_conf	0	0.414	1.003	2.059	0.768	0.867	1.144	0	1.97	0	2.408	2.57	1.648
Chr1L	16906280	16906781	L_dist_noab_326	distal_noab_high	0.665	1.035	0.43	1.716	1.153	0.723	1.716	0	0	0	1.806	3.427	2.307
Chr1L	16912436	16912937	L_dist_noab_327	distal_noab_high	0.222	0.207	0.143	0	0.64	0.578	0.191	0	0	0	0.903	1.999	0.659
Chr1L	16919335	16919836	L_dist_lo_328	distal_low_conf	0.554	3.311	1.147	1.373	0.64	1.156	3.242	4.053	0	0	1.806	3.141	1.977
Chr1L	17069720	17070221	L_prox_lo_329	proximal_low_conf	0.333	1.035	0.573	1.03	0.897	1.012	1.907	0	3.941	0	2.408	2.57	2.966
Chr1L	17195049	17195550	L_prox_lo_330	proximal_low_conf	0	0.414	0.86	0.343	0.128	0.145	0	0	0	8.334	1.505	1.999	0.33
Chr1L	17234969	17235470	L_dist_lo_331	distal_low_conf	0.333	1.656	0.717	1.03	1.025	1.879	1.144	0	0	0	0.602	1.999	1.318
Chr1L	17242199	17242700	L_dist_noab_332	distal_noab_high	0.333	0	0.143	0.343	0.128	0.145	0	4.053	0	0	1.505	1.428	1.977
Chr1L	17249435	17249936	L_dist_lo_333	distal_low_conf	0.222	0.621	0.43	0.686	0.512	0.434	0	0	0	0	2.408	1.714	0.33
Chr1L	17249798	17250299	L_prox_lo_334	proximal_low_conf	0.111	1.656	0.573	2.059	0.897	0.723	0.191	0	0	0	3.912	1.142	0.659
Chr1L	17260588	17261089	L_prox_lo_335	proximal_low_conf	0.111	7.45	6.307	0.343	0.768	2.457	2.861	0	1.97	0	1.806	0.286	1.977
Chr1L	17267417	17267918	L_dist_noab_336	distal_noab_high	0.665	0.621	0.573	0.686	1.153	1.59	2.289	0	1.97	0	1.806	0.857	2.636
Chr1L	17317279	17317780	L_dist_noab_337	distal_noab_high	0.444	0.828	0.43	0	0.256	0.434	0.572	0	0	0	1.204	1.428	1.648
Chr1L	17359597	17360098	L_dist_noab_338	distal_noab_high	0.887	1.449	1.003	1.716	0.64	1.156	1.335	0	1.97	0	2.408	3.141	3.954
Chr1L	17908180	17908681	L_dist_noab_339	distal_noab_high	0.333	0.207	0.43	0.343	0.512	0.289	0.381	4.053	0	0	3.01	1.142	0.33
Chr1L	18052722	18053223	L_dist_noab_340	distal_noab_high	0.665	0.828	0.573	0.686	0.897	1.156	1.716	0	0	0	3.01	3.998	1.648
Chr1L	18074656	18075157	L_dist_noab_341	distal_noab_high	0.554	0.828	0.43	0.686	0.768	0.434	0.763	0	0	0	0.602	0.571	2.307
Chr1L	18080313	18080814	L_dist_noab_342	distal_noab_high	0.222	0.414	0.143	0.686	0.128	0.434	2.098	0	1.97	0	1.204	0.857	1.648
Chr1L	18083609	18084110	L_prox_hi_343	proximal_high_conf	0.333	3.311	2.294	0.686	1.153	1.879	2.289	8.106	5.911	0	2.709	6.854	6.591
Chr1L	18096596	18097097	L_dist_lo_344	distal_low_conf	0	0.414	0	0.686	0.384	0.867	0.954	4.053	0	0	1.806	0.857	1.648
Chr1L	18254107	18254608	L_dist_hi_345	distal_high_conf	0.444	3.311	5.161	3.432	1.281	3.757	8.582	0	1.97	0	7.825	9.424	7.25
Chr1L	18258325	18258826	L_prox_hi_346	proximal_high_conf	0	2.276	5.304	1.03	0.64	1.445	1.907	8.106	7.882	8.334	12.339	11.709	5.273
Chr1L	18259742	18260243	L_dist_noab_347	distal_noab_high	0.665	1.242	2.437	0	0.512	1.012	0.572	0	0	0	3.612	0.857	0
Chr1L	18260569	18261070	L_dist_lo_348	distal_low_conf	0.111	1.242	1.29	1.716	0.897	1.301	1.526	0	1.97	0	4.815	3.141	0.659
Chr1L	18260877	18261378	L_dist_lo_349	distal_low_conf	0.111	0.414	1.147	0.686	0.768	1.156	1.716	0	1.97	0	5.417	4.569	1.318
Chr1L	18261829	18262330	L_dist_lo_350	distal_low_conf	0.111	1.035	0.573	0.686	0.512	0.289	0.191	0	0	0	1.505	1.142	0.33
Chr1L	18269286	18269787	L_dist_noab_351	distal_noab_high	0.776	1.242	1.147	0.343	0.384	2.312	5.34	0	0	0	8.427	4.855	0.33
Chr1L	18271142	18271643	L_dist_noab_352	distal_noab_high	0.665	1.449	0.86	1.373	1.025	5.347	7.247	0	0	0	8.126	9.424	2.966
Chr1L	18282623	18283124	L_dist_noab_353	distal_noab_high	0.887	2.069	1.864	1.716	0.384	3.035	7.247	0	5.911	0	8.728	7.997	4.943
Chr1L	18464011	18464512	L_dist_noab_354	distal_noab_high	0.333	0.207	0.43	0	0.128	0.578	0.191	0	0	0	0.301	1.999	0.989
Chr1L	18596269	18596770	L_prox_hi_355	proximal_high_conf	0.333	4.76	4.444	2.746	1.153	3.324	3.433	4.053	11.823	0	4.815	5.997	6.92
Chr1L	18596653	18597154	L_prox_hi_356	proximal_high_conf	0	2.069	3.87	1.373	1.281	1.156	1.335	0	3.941	0	2.408	4.855	4.614
Chr1L	18739271	18739772	L_prox_hi_357	proximal_high_conf	0.333	1.449	2.724	0.686	1.793	1.156	2.861	4.053	7.882	0	3.311	2.285	2.636
Chr1L	18744593	18745094	L_prox_hi_358	proximal_high_conf	0.665	2.276	2.294	2.746	1.409	1.301	1.907	0	5.911	0	5.417	5.997	5.273
Chr1L	18768333	18768834	L_prox_hi_359	proximal_high_conf	0	1.656	3.584	2.059	0.384	1.59	1.907	4.053	0	0	2.107	2.856	1.648
Chr1L	18804239	18804740	L_prox_lo_360	proximal_low_conf	0.554	2.69	3.154	1.03	0.512	3.613	3.051	0	1.97	0	1.806	2.57	2.636
Chr1L	18804504	18805005	L_prox_lo_361	proximal_low_conf	0.665	2.483	4.874	1.373	0.897	3.613	4.768	0	1.97	0	1.806	3.713	2.307
Chr1L	18804905	18805406	L_prox_hi_362	proximal_high_conf	0.887	2.897	3.87	3.776	1.665	2.312	5.531	12.158	0	0	8.427	9.139	11.204
Chr1L	18811012	18811513	L_dist_lo_363	distal_low_conf	0.222	1.242	0.717	1.03	0.128	0.434	1.716	0	1.97	0	1.204	2.285	0.659
Chr1L	18813054	18813555	L_dist_lo_364	distal_low_conf	0.111	0.414	0.573	0.343	0.256	0.867	0.954	0	0	0	2.107	1.999	1.318
Chr1L	18815077	18815578	L_dist_lo_365	distal_low_conf	0.333	1.035	0.86	0.686	0.512	0.867	1.335	4.053	0	0	1.204	1.714	0.659
Chr1L	18914694	18915195	L_prox_hi_366	proximal_high_conf	0.554	1.863	1.72	3.776	1.921	1.156	1.907	0	1.97	0	1.806	2.856	4.284
Chr1L	18915271	18915772	L_prox_hi_367	proximal_high_conf	0.333	1.863	1.433	1.373	0.897	0.867	1.335	4.053	3.941	0	2.107	4.284	2.966
Chr1L	18966964	18967465	L_dist_hi_368	distal_high_conf	0.444	2.276	2.294	3.089	1.025	2.89	3.051	0	0	0	3.311	5.141	2.307
Chr1L	18968241	18968742	L_blklst_369	blacklisted	0.998	1.449	1.577	1.03	0.64	1.445	1.907	0	0	0	3.311	4.284	1.977
Chr1L	18977652	18978153	L_prox_lo_370	proximal_low_conf	0.554	1.242	2.867	0.686	1.153	1.156	0.572	4.053	0	8.334	4.815	6.283	2.636
Chr1L	18978567	18979068	L_prox_noab_371	proximal_noab_high	0.333	0.621	1.147	0	0.512	0.289	0.381	0	0	0	2.709	2.856	0.659
Chr1L	18979521	18980022	L_dist_noab_372	distal_noab_high	0.776	0.414	1.433	0.686	0.64	0.434	1.716	0	0	0	2.107	3.141	3.295
Chr1L	18986917	18987418	L_prox_noab_373	proximal_noab_high	0.998	0.207	1.433	0.343	0.64	1.012	2.289	0	0	0	5.417	5.712	6.261
Chr1L	19076092	19076593	L_dist_noab_374	distal_noab_high	0.222	0.207	0.43	0.686	0.128	0	0.763	0	0	0	2.107	0.857	0.33
Chr1L	19081101	19081602	L_prox_noab_375	proximal_noab_high	0.887	2.276	0.717	1.03	0.768	1.156	1.144	8.106	1.97	0	2.408	4.569	5.273
Chr1L	19083017	19083518	L_dist_noab_376	distal_noab_high	0.665	0.621	0.717	1.373	0.128	0.434	0.572	0	3.941	8.334	1.806	1.142	1.318
Chr1L	19100699	19101200	L_prox_lo_377	proximal_low_conf	0.554	1.863	3.154	1.03	0.384	0.723	0.954	0	0	0	1.806	2.285	2.966
Chr1L	19207591	19208092	L_dist_noab_378	distal_noab_high	0.444	0.621	0.143	0.686	1.409	0.434	0.381	0	0	0	1.204	1.428	1.648
Chr1L	19208269	19208770	L_dist_noab_379	distal_noab_high	0.665	0.414	0.573	0.343	0.64	0.145	0.381	0	0	0	0.301	1.999	0.989
Chr1L	19223370	19223871	L_dist_noab_380	distal_noab_high	0.665	1.035	1.577	0.686	0.384	0.723	1.144	0	0	0	1.806	1.999	3.954
Chr1L	19224433	19224934	L_dist_hi_381	distal_high_conf	0	2.69	2.294	2.403	0.897	1.734	2.861	0	0	0	4.213	4.569	2.636
Chr1L	19225468	19225969	L_dist_lo_382	distal_low_conf	0.222	1.242	1.72	1.03	0.512	0.723	0.572	0	0	8.334	0.602	1.142	1.977
Chr1L	19228764	19229265	L_dist_noab_383	distal_noab_high	0.444	0.621	0.143	0.343	1.025	0.867	0	0	0	0	1.204	1.142	2.307
Chr1L	19231835	19232336	L_dist_noab_384	distal_noab_high	0.776	0.207	1.29	0.686	0.768	0.867	0.763	0	1.97	0	2.709	0.857	0.659
Chr1L	19340027	19340528	L_dist_noab_385	distal_noab_high	0.444	1.656	0.86	0.343	0.384	1.012	0.381	0	0	0	2.107	0.571	0.659
Chr1L	19363816	19364317	L_prox_hi_386	proximal_high_conf	0.111	1.242	1.864	2.403	1.537	0.867	0.954	4.053	7.882	0	5.116	6.283	6.92
Chr1L	19364227	19364728	L_prox_hi_387	proximal_high_conf	0.444	1.449	2.58	2.059	2.305	0.723	2.289	0	7.882	0	3.311	3.713	3.954
Chr1L	19364514	19365015	L_prox_lo_388	proximal_low_conf	0.665	1.449	2.15	0.686	2.177	0.867	2.289	0	5.911	8.334	3.01	2.856	0.989
Chr1L	19386789	19387290	L_dist_lo_389	distal_low_conf	0.444	0.828	1.003	1.373	0.768	1.012	1.144	0	0	0	3.311	2.285	1.977
Chr1L	19822798	19823299	L_dist_hi_390	distal_high_conf	0.333	1.449	1.577	1.373	0.64	1.445	1.907	0	1.97	0	1.806	1.428	2.636
Chr1L	19823519	19824020	L_dist_noab_391	distal_noab_high	0.333	0.828	0.287	0.343	0.897	1.301	1.144	4.053	0	0	2.107	1.428	0.33
Chr1L	19871686	19872187	L_dist_noab_392	distal_noab_high	0.554	0.828	0.717	0.686	0.256	2.312	2.479	0	0	0	2.408	1.714	1.318
Chr1L	19888016	19888517	L_dist_noab_393	distal_noab_high	0.776	0.621	0.573	0.686	0.512	1.734	2.289	0	1.97	0	1.505	2.285	2.307
Chr1L	19892410	19892911	L_dist_hi_394	distal_high_conf	0.444	1.035	0.573	1.716	1.025	2.312	3.814	0	0	0	1.505	3.713	1.648
Chr1L	19898250	19898751	L_dist_noab_395	distal_noab_high	0.222	0.414	0.143	0	0.384	0.434	0.572	4.053	0	0	1.204	1.428	1.648
Chr1L	19936609	19937110	L_dist_noab_396	distal_noab_high	0.776	2.069	0.717	0.686	0.512	2.312	3.814	0	1.97	0	3.912	1.714	0.33
Chr1L	19940381	19940882	L_dist_noab_397	distal_noab_high	0.333	0.621	1.147	0	0.384	1.879	1.907	0	0	0	1.806	3.427	1.648
Chr1L	19944146	19944647	L_prox_noab_398	proximal_noab_high	1.109	2.897	2.007	1.03	0.64	3.324	4.386	0	0	0	3.912	3.427	4.614
Chr1L	19944717	19945218	L_prox_lo_399	proximal_low_conf	0.887	2.69	3.584	1.373	0.897	3.035	4.386	0	0	0	4.815	7.425	6.92
Chr1L	19946689	19947190	L_dist_hi_400	distal_high_conf	0.554	1.449	2.724	2.746	1.153	5.925	5.531	4.053	1.97	0	5.417	5.141	2.966
Chr1L	20200169	20200670	L_dist_noab_401	distal_noab_high	0.554	0.621	0.573	0.343	0.64	0.723	1.144	0	0	8.334	2.107	1.142	1.977
Chr1L	20203479	20203980	L_prox_hi_402	proximal_high_conf	0.222	2.069	1.433	1.03	1.409	2.168	2.861	4.053	5.911	0	5.116	5.141	3.295
Chr1L	20267387	20267888	L_prox_lo_403	proximal_low_conf	0.111	0.621	1.29	1.716	0.64	0.867	2.289	0	0	0	2.408	1.428	2.636
Chr1L	20280151	20280652	L_dist_noab_404	distal_noab_high	0.665	0.414	0.717	0.343	0.384	0.434	0.381	0	0	0	2.107	1.428	1.318
Chr1L	20322660	20323161	L_dist_noab_405	distal_noab_high	0.333	0.414	0.287	0.343	1.025	0.145	0.381	0	1.97	0	2.408	0.857	1.648
Chr1L	20736803	20737304	L_dist_noab_406	distal_noab_high	0.554	0.828	0.43	0	0.768	0.434	0.572	4.053	1.97	0	1.806	2.856	1.318
Chr1L	20833837	20834338	L_dist_noab_407	distal_noab_high	0.444	0.621	0.287	1.03	0.64	0.434	0.191	0	0	0	1.505	1.428	0.989
Chr1L	20837611	20838112	L_dist_noab_408	distal_noab_high	0.444	0.621	1.003	0	0.128	0.145	0.191	0	0	0	1.505	2.285	0.989
Chr1L	20870056	20870557	L_dist_noab_409	distal_noab_high	0.665	0.207	0.143	2.059	0.256	1.59	2.098	0	0	0	2.709	2.856	0.33
Chr1L	21061653	21062154	L_dist_noab_410	distal_noab_high	0.776	1.242	1.29	0.686	0.768	1.156	1.907	0	1.97	0	1.505	2.57	0.659
Chr1L	21062712	21063213	L_prox_hi_411	proximal_high_conf	0.444	3.725	5.017	8.581	1.921	3.035	4.959	4.053	0	0	2.408	2.57	1.318
Chr1L	21063083	21063584	L_prox_hi_412	proximal_high_conf	0.554	4.346	4.587	6.865	1.281	1.879	4.005	0	0	0	4.815	4.284	1.318
Chr1L	21063534	21064035	L_prox_hi_413	proximal_high_conf	0.444	2.69	4.3	1.716	1.665	0.867	1.907	4.053	3.941	0	4.213	5.141	3.295
Chr1L	21067803	21068304	L_dist_hi_414	distal_high_conf	0.333	2.897	3.01	2.746	0.768	3.468	3.624	0	0	0	2.709	2.57	1.977
Chr1L	21068158	21068659	L_dist_hi_415	distal_high_conf	0.333	1.035	2.724	2.746	0.512	3.324	5.149	0	0	0	2.408	4.855	1.977
Chr1L	21074740	21075241	L_dist_noab_416	distal_noab_high	0.444	0.621	1.147	0	0.512	1.301	1.526	0	0	0	1.806	2.856	1.977
Chr1L	21081778	21082279	L_dist_lo_417	distal_low_conf	0.222	1.242	0.573	0.343	0.64	0.289	0.572	0	0	0	1.204	2.57	0.989
Chr1L	21084464	21084965	L_prox_hi_418	proximal_high_conf	0.665	1.035	1.577	2.403	1.537	1.734	2.098	0	1.97	0	3.612	3.713	4.614
Chr1L	21089888	21090389	L_prox_lo_419	proximal_low_conf	0.333	0.828	2.007	2.746	0.64	1.445	1.907	0	1.97	0	3.912	3.998	3.625
Chr1L	21105531	21106032	L_dist_noab_420	distal_noab_high	0.665	0.621	0.86	0.343	0.64	1.879	0.381	0	0	0	1.204	1.714	1.648
Chr1L	21127489	21127990	L_dist_noab_421	distal_noab_high	0.665	0.414	0.573	0.686	0.897	0.867	1.716	0	3.941	0	0.602	1.142	2.307
Chr1L	21168738	21169239	L_dist_lo_422	distal_low_conf	0.444	1.863	1.003	0.686	0.384	0.578	0.763	4.053	0	0	3.01	1.142	0.989
Chr1L	21387578	21388079	L_dist_noab_423	distal_noab_high	0.444	0.828	1.29	1.03	0.256	0.723	0.191	0	0	8.334	1.204	1.999	0.33
Chr1L	21565953	21566454	L_dist_noab_424	distal_noab_high	0.444	0.621	0.86	0.343	0.64	0.723	0.954	0	0	0	2.408	1.142	0.989
Chr1L	21604082	21604583	L_dist_noab_425	distal_noab_high	0.333	0.414	0.717	0.686	0.256	0.578	0.572	0	0	0	2.107	1.714	0.659
Chr1L	21643809	21644310	L_prox_hi_426	proximal_high_conf	0.776	3.518	2.867	4.119	2.177	0.867	0.954	4.053	0	0	5.718	8.282	11.204
Chr1L	21853875	21854376	L_prox_noab_427	proximal_noab_high	0.333	0.414	0.86	1.03	0.384	1.879	1.907	8.106	1.97	0	2.107	2.856	3.954
Chr1L	21854795	21855296	L_prox_lo_428	proximal_low_conf	0.998	1.242	3.297	2.059	1.665	4.335	5.912	4.053	7.882	0	6.922	8.853	7.25
Chr1L	21856376	21856877	L_dist_noab_429	distal_noab_high	0.554	0.828	1.147	0.686	0.256	0.867	2.289	0	0	0	2.107	2.856	0.989
Chr1L	21862320	21862821	L_dist_lo_430	distal_low_conf	0.222	0.414	0.86	1.373	0.256	1.156	1.526	0	0	0	1.505	2.285	0.989
Chr1L	21872078	21872579	L_dist_noab_431	distal_noab_high	1.109	2.276	0.86	3.089	0.64	3.902	5.721	0	1.97	0	1.806	3.427	1.318
Chr1L	21878499	21879000	L_dist_hi_432	distal_high_conf	0.887	3.104	3.87	4.119	1.921	2.312	5.149	12.158	1.97	0	8.126	9.139	6.591
Chr1L	21887471	21887972	L_dist_noab_433	distal_noab_high	0.222	0.414	0.143	0	0.512	0.578	0.572	4.053	3.941	0	2.107	1.428	0.659
Chr1L	21888990	21889491	L_prox_hi_434	proximal_high_conf	0.554	2.069	2.437	1.03	1.921	3.757	1.907	4.053	9.852	0	4.815	4.855	6.591
Chr1L	22008358	22008859	L_dist_lo_435	distal_low_conf	0.222	0.621	0.573	2.059	0.64	0.434	0.381	4.053	0	0	2.107	1.142	1.318
Chr1L	22029459	22029960	L_prox_hi_436	proximal_high_conf	0.333	1.656	1.29	1.373	1.153	0.867	0.954	0	3.941	0	1.806	1.714	1.977
Chr1L	22127638	22128139	L_dist_noab_437	distal_noab_high	0.665	0.414	0.43	1.373	0.768	1.156	0.763	0	1.97	0	0.903	2.856	1.648
Chr1L	22130067	22130568	L_dist_noab_438	distal_noab_high	0.333	0.621	0.573	0.343	0.64	0.578	0.381	0	0	0	1.806	3.141	1.648
Chr1L	22130374	22130875	L_dist_lo_439	distal_low_conf	0.333	0.828	0.717	1.03	1.025	0.434	0.572	4.053	3.941	0	3.01	2.856	1.977
Chr1L	22146586	22147087	L_prox_hi_440	proximal_high_conf	0.222	1.863	1.577	1.03	1.409	1.012	1.144	8.106	0	0	3.912	3.427	3.625
Chr1L	22147626	22148127	L_dist_lo_441	distal_low_conf	0.333	0.414	1.433	1.373	0.897	0.145	0.763	0	0	0	2.107	1.999	0.989
Chr1L	22148569	22149070	L_dist_hi_442	distal_high_conf	0.444	1.035	1.29	2.059	0.768	0.578	0.763	4.053	0	0	2.107	1.999	1.318
Chr1L	22280620	22281121	L_prox_lo_443	proximal_low_conf	0.222	1.863	2.294	0.686	1.793	1.445	0.763	0	0	0	1.505	2.285	0.989
Chr1L	22322246	22322747	L_dist_lo_444	distal_low_conf	0.111	0.207	0.143	0.686	0.128	0.289	0.191	0	0	0	0.903	1.142	0.989
Chr1L	22350704	22351205	L_dist_noab_445	distal_noab_high	0.333	0.207	0.717	0.343	1.153	0.867	0.191	4.053	0	8.334	1.204	0.857	1.318
Chr1L	22369645	22370146	L_prox_noab_446	proximal_noab_high	0.776	1.242	1.29	1.373	1.409	1.445	1.144	0	3.941	0	8.427	5.712	4.284
Chr1L	22370925	22371426	L_dist_noab_447	distal_noab_high	0.333	0	0.573	1.373	0.512	0.289	0.381	0	1.97	0	2.107	2.57	1.977
Chr1L	22417745	22418246	L_dist_noab_448	distal_noab_high	0.444	0.414	0.86	0	0.897	0.867	0.381	0	1.97	8.334	1.204	1.714	1.648
Chr1L	22584238	22584739	L_prox_hi_449	proximal_high_conf	0.333	1.242	2.437	1.716	0.768	0.578	1.526	4.053	1.97	0	4.514	6.283	6.261
Chr1L	22584808	22585309	L_prox_lo_450	proximal_low_conf	0.222	0.828	1.864	0	0.384	0.289	0.763	0	0	0	3.612	3.141	1.318
Chr1L	22586833	22587334	L_dist_noab_451	distal_noab_high	0.333	0.207	0.287	0.343	0.512	0.867	0.572	0	0	0	0.602	2.57	1.648
Chr1L	22587610	22588111	L_prox_noab_452	proximal_noab_high	0.444	0	0.287	2.059	0.64	0.434	0.381	0	0	8.334	2.709	2.285	1.977
Chr1L	22588615	22589116	L_prox_hi_453	proximal_high_conf	0.333	1.035	1.29	1.373	1.025	0.867	0.954	0	0	8.334	5.417	2.856	5.932
Chr1L	22603182	22603683	L_dist_noab_454	distal_noab_high	0.444	0.828	0.573	0	0.512	0.289	0.763	0	0	0	0.903	2.285	0.989
Chr1L	22660948	22661449	L_prox_hi_455	proximal_high_conf	0.333	2.276	2.294	1.03	1.025	0.578	1.144	0	0	8.334	5.718	2.285	2.307
Chr1L	22661431	22661932	L_prox_hi_456	proximal_high_conf	0.665	3.104	2.867	2.403	1.153	0.867	3.051	0	0	8.334	4.213	1.714	5.273
Chr1L	22690377	22690878	L_prox_hi_457	proximal_high_conf	0.554	4.346	3.154	1.373	2.049	2.168	2.289	4.053	7.882	0	4.815	7.14	4.614
Chr1L	22691006	22691507	L_prox_hi_458	proximal_high_conf	0.665	2.897	3.44	1.03	2.305	2.457	6.103	0	5.911	8.334	2.107	4.284	3.625
Chr1L	22691451	22691952	L_prox_noab_459	proximal_noab_high	0.998	1.449	2.15	1.03	0.897	1.59	2.67	0	0	0	2.107	3.998	3.625
Chr1L	22695504	22696005	L_dist_noab_460	distal_noab_high	0.665	0	0.287	0.343	1.153	0.723	0.763	0	0	0	0.301	2.57	0.659
Chr1L	22723489	22723990	L_dist_lo_461	distal_low_conf	0.444	2.069	2.007	0.686	0.256	0.867	1.526	0	3.941	0	0.903	1.999	2.636
Chr1L	22772933	22773434	L_dist_noab_462	distal_noab_high	0.444	0.621	0.287	0.686	0.256	0.578	0	0	0	0	2.107	2.285	1.318
Chr1L	22792566	22793067	L_dist_noab_463	distal_noab_high	0.665	0.621	0.287	0	1.025	2.168	3.433	0	0	8.334	3.01	3.998	2.307
Chr1L	22831542	22832043	L_prox_noab_464	proximal_noab_high	0.887	1.035	2.294	2.403	1.153	1.156	1.335	4.053	1.97	0	1.204	1.714	4.284
Chr1L	22831913	22832414	L_prox_lo_465	proximal_low_conf	0.444	2.276	3.297	2.059	1.025	1.734	1.526	4.053	1.97	0	0.903	2.57	3.625
Chr1L	22939421	22939922	L_prox_noab_466	proximal_noab_high	0.111	0	0	0	0.256	0.289	0.381	0	0	0	1.505	2.285	0.989
Chr1L	22957281	22957782	L_prox_lo_467	proximal_low_conf	0.333	1.863	0.86	1.03	0.768	1.012	0.381	8.106	0	0	5.116	7.425	5.932
Chr1L	23071276	23071777	L_prox_noab_468	proximal_noab_high	1.109	2.276	2.724	1.716	0.64	1.445	2.098	4.053	0	8.334	8.126	10.567	8.239
Chr1L	23085521	23086022	L_dist_noab_469	distal_noab_high	0.333	0.621	0.717	0	0.384	0.723	0.381	0	0	0	2.408	0.571	1.648
Chr1L	23089031	23089532	L_dist_lo_470	distal_low_conf	0.222	0.828	1.147	1.03	1.281	1.301	1.526	0	0	0	0.903	1.999	0.659
Chr1L	23130690	23131191	L_dist_noab_471	distal_noab_high	0.665	0	0.43	0.343	0.768	0.723	0.191	0	1.97	0	1.505	0.857	2.966
Chr1L	23248539	23249040	L_prox_noab_472	proximal_noab_high	0.776	2.276	1.577	0.686	1.153	2.023	1.526	4.053	1.97	0	2.709	2.856	3.295
Chr1L	23332806	23333307	L_prox_noab_473	proximal_noab_high	0.776	1.035	2.15	0	1.409	0.867	0.381	0	3.941	0	2.709	2.285	1.977
Chr1L	23513074	23513575	L_prox_lo_474	proximal_low_conf	0.111	0.621	1.864	0.686	1.153	0.867	0.191	8.106	5.911	0	5.718	6.854	7.909
Chr1L	23683563	23684064	L_prox_noab_475	proximal_noab_high	0.554	1.035	0.717	0.343	0.897	0.723	1.335	0	3.941	8.334	3.311	5.141	1.318
Chr1L	23686192	23686693	L_prox_lo_476	proximal_low_conf	0.333	0.207	0.717	1.373	1.025	1.445	0.763	0	0	0	1.806	1.428	1.318
Chr1L	23731908	23732409	L_dist_noab_477	distal_noab_high	0.444	0.828	0.717	1.373	0.768	1.879	2.098	0	1.97	0	1.806	2.57	0.989
Chr1L	23739296	23739797	L_dist_noab_478	distal_noab_high	0.665	1.035	1.147	0.686	0.768	3.902	3.433	0	1.97	0	2.709	3.141	1.648
Chr1L	23742617	23743118	L_dist_noab_479	distal_noab_high	1.442	2.069	1.577	1.03	1.153	1.156	2.098	0	3.941	0	3.612	2.856	2.307
Chr1L	23765343	23765844	L_dist_noab_480	distal_noab_high	0.887	1.035	1.72	0.686	0.384	2.601	3.051	0	0	0	1.505	2.57	2.966
Chr1L	23804571	23805072	L_dist_noab_481	distal_noab_high	0.554	0.207	0.43	0.686	1.025	0.289	0.381	0	1.97	8.334	1.505	2.57	0.989
Chr1L	24001975	24002476	L_prox_lo_482	proximal_low_conf	0.665	0.828	2.867	2.746	0.768	1.445	1.335	0	3.941	0	3.01	3.141	4.943
Chr1L	24002251	24002752	L_prox_lo_483	proximal_low_conf	0.444	0.621	1.433	1.716	0.897	1.156	1.144	0	3.941	0	3.612	2.57	2.307
Chr1L	24242392	24242893	L_prox_hi_484	proximal_high_conf	0.554	1.863	1.29	0.686	1.665	1.445	2.098	0	0	8.334	1.505	3.427	2.636
Chr1L	24242825	24243326	L_prox_lo_485	proximal_low_conf	0.554	2.483	1.72	1.03	1.153	0.723	1.907	4.053	5.911	8.334	4.815	3.713	3.625
Chr1L	24243093	24243594	L_prox_hi_486	proximal_high_conf	0.222	1.863	1.147	1.716	0.897	0.434	1.144	0	5.911	0	5.116	4.569	2.636
Chr1L	24243791	24244292	L_dist_hi_487	distal_high_conf	0.444	0.828	1.29	2.059	1.025	1.156	0	0	5.911	0	1.505	3.713	2.307
Chr1L	24244602	24245103	L_dist_lo_488	distal_low_conf	0	0.828	1.577	0.343	0.512	1.012	0.954	4.053	0	0	3.912	3.998	1.318
Chr1L	24246581	24247082	L_dist_noab_489	distal_noab_high	0.554	0.207	0.86	0.686	0.512	0.578	0.954	0	0	0	2.107	4.284	0.989
Chr1L	24409432	24409933	L_dist_noab_490	distal_noab_high	0.444	0.414	0.143	0.686	0.512	0.723	0.572	0	3.941	0	1.505	1.714	1.977
Chr1L	24446408	24446909	L_dist_lo_491	distal_low_conf	0.222	0.621	1.003	0.343	0.897	0.723	0.763	4.053	3.941	0	3.311	3.998	3.295
Chr1L	24448723	24449224	L_prox_hi_492	proximal_high_conf	0	2.276	2.007	1.716	1.153	0.723	0.572	0	5.911	0	2.107	2.856	1.648
Chr1L	24449086	24449587	L_prox_hi_493	proximal_high_conf	0.444	1.449	2.007	1.373	1.153	0.723	0.572	0	1.97	0	2.107	2.856	1.977
Chr1L	24451811	24452312	L_dist_lo_494	distal_low_conf	0.444	0.621	1.003	2.059	0.256	0.867	0	0	1.97	0	0.903	1.714	0.989
Chr1L	24461229	24461730	L_prox_lo_495	proximal_low_conf	0.444	1.656	1.577	0	0.64	0.289	0.381	4.053	5.911	0	5.116	4.569	0.989
Chr1L	24598242	24598743	L_dist_hi_496	distal_high_conf	0.554	0.828	1.433	1.373	1.281	1.734	2.098	4.053	0	0	3.311	3.713	1.977
Chr1L	24627307	24627808	L_dist_noab_497	distal_noab_high	0.444	2.069	0.287	0.686	0.128	0.434	1.907	4.053	3.941	0	2.107	3.141	2.966
Chr1L	24629979	24630480	L_dist_hi_498	distal_high_conf	0.222	2.069	1.433	1.716	0.512	1.012	2.479	8.106	0	0	2.107	3.141	1.318
Chr1L	24735500	24736001	L_prox_hi_499	proximal_high_conf	0.333	1.242	1.577	1.373	0.768	0.723	1.716	0	3.941	0	1.806	3.141	2.307
Chr1L	24992666	24993167	L_prox_lo_500	proximal_low_conf	0.887	1.656	2.15	1.716	2.049	1.445	0.763	8.106	1.97	8.334	3.01	1.428	4.614
Chr1L	24993190	24993691	L_prox_hi_501	proximal_high_conf	0.887	2.897	2.724	2.059	2.69	1.445	2.289	0	5.911	0	5.417	4.569	3.954
Chr1L	25109725	25110226	L_prox_hi_502	proximal_high_conf	0	1.242	0.86	1.373	1.409	1.012	1.144	4.053	3.941	8.334	3.612	2.856	3.625
Chr1L	25175094	25175595	L_prox_hi_503	proximal_high_conf	0.222	1.449	1.147	1.373	1.281	0.723	0	4.053	3.941	0	6.621	5.426	7.579
Chr1L	25228214	25228715	L_dist_noab_504	distal_noab_high	0.665	0.207	0.287	0.686	0.768	0.434	0.572	4.053	0	0	1.505	1.999	0.989
Chr1L	25306385	25306886	L_dist_lo_505	distal_low_conf	0.222	0	0	1.373	0.897	0.578	0.191	0	3.941	0	4.213	5.141	4.943
Chr1L	25343268	25343769	L_prox_hi_506	proximal_high_conf	0.554	1.449	2.007	2.746	1.409	1.879	2.67	0	3.941	0	4.815	6.283	5.932
Chr1L	25343587	25344088	L_prox_hi_507	proximal_high_conf	0.444	0.621	1.003	1.03	1.409	1.734	1.335	0	1.97	0	3.311	2.856	3.625
Chr1L	25518162	25518663	L_dist_noab_508	distal_noab_high	0.998	0.207	0.717	0.686	0.897	0.289	0.381	0	1.97	8.334	1.505	1.714	1.648
Chr1L	25582660	25583161	L_dist_lo_509	distal_low_conf	0.333	0.828	0.86	0.343	0.897	0.723	0.763	0	1.97	0	2.107	1.428	3.295
Chr1L	25838951	25839452	L_dist_lo_510	distal_low_conf	0.222	0.828	0.86	1.373	0.256	0.723	1.335	4.053	0	0	0.602	2.285	0.659
Chr1L	26035036	26035537	L_prox_noab_511	proximal_noab_high	0.554	0.828	0.86	1.373	0.64	0.289	0.572	0	0	0	3.311	4.855	5.602
Chr1L	26051815	26052316	L_prox_hi_512	proximal_high_conf	0.333	1.656	1.433	1.03	1.025	0.578	0	4.053	1.97	0	2.709	3.713	4.284
Chr1L	26052319	26052820	L_prox_lo_513	proximal_low_conf	0.444	1.242	1.433	0.686	1.025	0.578	0.381	8.106	0	0	3.612	1.714	0.33
Chr1L	26076180	26076681	L_prox_hi_514	proximal_high_conf	0.444	3.104	1.72	1.716	1.281	1.445	1.526	0	0	8.334	2.107	1.714	3.295
Chr1L	26076570	26077071	L_prox_hi_515	proximal_high_conf	0.222	2.276	1.003	1.716	1.025	1.445	1.144	4.053	0	0	1.806	5.997	6.92
Chr1L	26105926	26106427	L_dist_lo_516	distal_low_conf	0.222	0.621	0.43	0.343	0.897	0.289	0.381	4.053	0	0	1.204	1.714	0.659
Chr1L	26137214	26137715	L_dist_noab_517	distal_noab_high	0.111	0.207	0.43	0	0.384	0.434	0.191	0	0	0	1.204	1.142	1.648
Chr1L	26153864	26154365	L_dist_lo_518	distal_low_conf	0.776	2.276	2.437	1.373	1.153	2.89	3.242	0	1.97	0	4.213	5.141	3.295
Chr1L	26160509	26161010	L_prox_hi_519	proximal_high_conf	0.111	1.656	2.294	1.03	0.897	0.867	1.526	0	0	0	4.514	5.426	3.295
Chr1L	26166339	26166840	L_dist_lo_520	distal_low_conf	0.222	0.414	1.003	0.686	0.384	0.578	0.381	0	0	0	1.505	2.57	0.659
Chr1L	26203908	26204409	L_dist_lo_521	distal_low_conf	0.111	0.207	0.86	0	0.384	0.434	0.572	0	1.97	0	2.107	1.428	0.33
Chr1L	26205243	26205744	L_dist_noab_522	distal_noab_high	0.444	0.828	0.287	0.686	1.153	0.867	0.191	0	1.97	0	3.01	3.713	0.989
Chr1L	26214167	26214668	L_dist_lo_523	distal_low_conf	0.111	0.621	1.147	0.686	0.768	0.434	0.954	0	1.97	0	3.912	3.141	0.989
Chr1L	26214867	26215368	L_dist_noab_524	distal_noab_high	0.998	1.242	1.577	0.686	0.768	1.156	0.954	0	0	0	4.213	4.284	2.636
Chr1L	26216574	26217075	L_dist_hi_525	distal_high_conf	0.554	2.69	2.15	0.686	1.409	1.59	0.763	4.053	1.97	0	2.709	2.285	1.977
Chr1L	26217274	26217775	L_prox_hi_526	proximal_high_conf	1.22	2.897	3.44	4.119	0.64	2.168	3.242	0	0	0	4.213	3.427	2.636
Chr1L	26217485	26217986	L_prox_lo_527	proximal_low_conf	1.331	4.967	4.014	4.119	1.025	2.023	4.386	0	0	0	3.311	3.998	2.636
Chr1L	26217928	26218429	L_prox_hi_528	proximal_high_conf	0.665	4.553	4.014	2.746	1.409	1.301	3.814	8.106	7.882	0	8.126	9.139	6.591
Chr1L	26237636	26238137	L_dist_hi_529	distal_high_conf	0.222	3.725	4.014	1.373	0.897	2.023	4.577	4.053	0	8.334	2.709	4.569	1.318
Chr1L	26238797	26239298	L_dist_hi_530	distal_high_conf	0.776	3.725	4.014	2.059	1.153	3.035	3.624	4.053	0	0	7.524	7.425	3.295
Chr1L	26240944	26241445	L_dist_hi_531	distal_high_conf	0.554	3.104	4.157	2.059	0.768	1.879	4.386	0	0	0	1.806	1.428	1.977
Chr1L	26241756	26242257	L_dist_lo_532	distal_low_conf	0.333	1.656	1.433	0.343	0.768	2.746	2.67	0	0	0	2.408	0.571	1.318
Chr1L	26242531	26243032	L_dist_hi_533	distal_high_conf	0.665	2.483	1.433	2.059	0.64	2.89	1.335	4.053	3.941	0	1.806	3.427	3.295
Chr1L	26346457	26346958	L_dist_noab_534	distal_noab_high	0.444	0.414	1.003	1.373	0.768	0.867	0.191	0	0	0	0.903	2.57	0.659
Chr1L	26387189	26387690	L_prox_noab_535	proximal_noab_high	0.554	0.621	1.577	0.343	1.025	0.723	0.954	4.053	3.941	0	5.417	3.998	7.579
Chr1L	26523844	26524345	L_prox_lo_536	proximal_low_conf	0.222	0.414	0.717	0.686	0.384	0.434	0.572	0	3.941	0	2.709	2.57	2.966
Chr1L	26524552	26525053	L_prox_hi_537	proximal_high_conf	0.444	1.656	1.433	1.03	0.897	1.012	0.763	0	3.941	0	6.922	8.853	5.932
Chr1L	26595130	26595631	L_dist_noab_538	distal_noab_high	0.776	1.035	0.717	0.686	1.025	0.578	2.289	0	1.97	0	1.806	1.714	0.989
Chr1L	26693081	26693582	L_prox_hi_539	proximal_high_conf	0.222	0.828	1.864	2.403	1.025	0.145	0	0	1.97	0	2.709	2.285	2.307
Chr1L	26767448	26767949	L_dist_noab_540	distal_noab_high	0.776	1.242	1.577	1.03	1.409	1.59	1.335	0	0	0	0.903	2.285	2.307
Chr1L	26804349	26804850	L_prox_lo_541	proximal_low_conf	0.111	1.242	2.15	0.686	0.897	0.867	1.907	0	0	0	1.806	2.57	2.636
Chr1L	26804695	26805196	L_prox_hi_542	proximal_high_conf	0	1.863	2.007	0.686	1.153	1.879	2.098	0	1.97	0	4.213	3.141	3.954
Chr1L	26854128	26854629	L_dist_noab_543	distal_noab_high	0.554	1.035	0.43	0	1.025	0.578	1.335	4.053	1.97	0	1.204	3.141	0.659
Chr1L	27020444	27020945	L_prox_hi_544	proximal_high_conf	0.665	2.483	3.297	2.059	1.281	0.723	0.572	0	1.97	0	2.709	1.999	2.307
Chr1L	27083217	27083718	L_dist_hi_545	distal_high_conf	0.444	2.276	2.58	3.776	0.768	1.156	3.242	0	0	0	3.612	5.712	3.295
Chr1L	27087133	27087634	L_dist_lo_546	distal_low_conf	0.554	0.414	1.433	2.403	0.512	1.301	2.479	0	0	0	2.408	1.142	0.989
Chr1L	27089147	27089648	L_dist_lo_547	distal_low_conf	0.554	2.276	2.437	2.059	1.281	1.301	3.624	8.106	0	0	2.408	3.713	0.989
Chr1L	27093910	27094411	L_prox_hi_548	proximal_high_conf	0.998	4.139	3.01	1.716	2.177	2.312	3.242	0	1.97	0	6.019	3.998	3.954
Chr1L	27094414	27094915	L_prox_lo_549	proximal_low_conf	0.665	2.069	2.007	0.686	1.153	1.734	0.954	0	1.97	0	2.709	1.714	0.989
Chr1L	27096632	27097133	L_dist_hi_550	distal_high_conf	0.333	1.242	2.007	1.373	0.768	1.445	1.716	4.053	1.97	0	5.417	3.141	2.966
Chr1L	27097286	27097787	L_dist_lo_551	distal_low_conf	0.554	1.035	3.01	2.059	0.256	1.734	1.716	4.053	0	0	4.815	0.857	2.636
Chr1L	27097577	27098078	L_dist_lo_552	distal_low_conf	0.333	0.621	1.29	1.03	0.64	1.734	0.954	0	0	0	3.912	0.571	2.636
Chr1L	27099796	27100297	L_dist_hi_553	distal_high_conf	0.222	1.449	0.86	1.373	1.153	0.578	1.907	0	0	0	2.709	1.142	1.318
Chr1L	27107530	27108031	L_dist_noab_554	distal_noab_high	0.776	0.207	0.717	0.686	0.384	0.867	0.763	0	0	0	3.01	1.142	1.318
Chr1L	27111260	27111761	L_dist_lo_555	distal_low_conf	0	0	0.287	0.686	0.768	0.867	0.191	0	0	0	1.204	2.285	1.318
Chr1L	27134215	27134716	L_dist_noab_556	distal_noab_high	0.887	1.656	2.15	0.343	0.512	3.468	3.814	0	0	0	1.806	3.998	1.977
Chr1L	27298255	27298756	L_prox_hi_557	proximal_high_conf	0.444	0.414	1.577	1.716	1.153	1.59	1.335	4.053	1.97	0	1.505	1.714	1.318
Chr1L	27298968	27299469	L_prox_hi_558	proximal_high_conf	0	2.069	1.433	1.716	1.665	0.867	0.572	0	1.97	0	1.806	1.428	1.648
Chr1L	27448166	27448667	L_dist_noab_559	distal_noab_high	0.333	0.414	0.43	0.343	0.64	0.434	0.191	4.053	1.97	0	2.107	2.285	3.954
Chr1L	27501203	27501704	L_prox_hi_560	proximal_high_conf	0.222	1.035	2.15	1.716	1.025	1.879	1.716	0	1.97	0	2.107	4.855	5.932
Chr1L	27552926	27553427	L_dist_noab_561	distal_noab_high	0.444	0.828	1.003	0.343	0.256	1.445	2.289	0	1.97	0	1.204	1.428	0.989
Chr1L	27616589	27617090	L_dist_noab_562	distal_noab_high	0.665	0.414	1.003	0.686	0.256	0.145	0.572	0	1.97	0	1.806	2.285	1.648
Chr1L	27716033	27716534	L_prox_hi_563	proximal_high_conf	0.444	1.449	0.86	1.373	1.281	0.578	0.572	4.053	0	8.334	3.612	3.427	2.966
Chr1L	27767719	27768220	L_dist_lo_564	distal_low_conf	0.111	1.449	0.717	1.03	0.256	1.012	1.716	0	0	0	2.709	0.857	0.33
Chr1L	27771690	27772191	L_prox_lo_565	proximal_low_conf	0.333	1.656	0.86	1.03	0.256	1.445	1.907	0	0	0	3.612	1.999	0.659
Chr1L	27774885	27775386	L_dist_noab_566	distal_noab_high	0.333	0.414	1.147	0.343	0.512	1.445	1.335	4.053	1.97	0	2.408	3.141	0.659
Chr1L	27889772	27890273	L_dist_noab_567	distal_noab_high	0.887	0.621	0.573	0.343	0.384	0.867	0.954	0	0	0	0.602	1.142	3.295
Chr1L	27958779	27959280	L_prox_hi_568	proximal_high_conf	0.665	2.069	2.867	0.686	1.665	0.723	2.479	8.106	0	0	3.01	4.284	6.591
Chr1L	27994090	27994591	L_prox_hi_569	proximal_high_conf	0.665	2.483	4.157	3.432	1.281	1.301	1.907	8.106	1.97	0	8.427	9.996	13.841
Chr1L	27994582	27995083	L_prox_hi_570	proximal_high_conf	0.444	1.656	1.72	2.403	0.897	1.156	0.572	8.106	0	0	2.408	1.142	2.307
Chr1L	28017238	28017739	L_dist_lo_571	distal_low_conf	0.111	1.863	4.014	0.343	0.64	1.879	2.67	0	0	0	1.505	3.998	0.659
Chr1L	28036337	28036838	L_prox_hi_572	proximal_high_conf	0.111	2.897	3.87	1.716	0.64	1.445	3.814	0	3.941	8.334	2.408	3.713	1.648
Chr1L	28036878	28037379	L_prox_hi_573	proximal_high_conf	0.222	3.311	3.297	2.746	1.281	2.312	4.005	0	0	0	2.408	1.428	1.977
Chr1L	28205235	28205736	L_prox_noab_574	proximal_noab_high	0.333	1.035	0.86	0.343	0.384	0.867	0.381	0	0	0	3.01	1.714	0.33
Chr1L	28207412	28207913	L_dist_noab_575	distal_noab_high	0.444	0.621	1.003	0.343	0.768	0.723	0.954	0	0	0	2.107	4.569	0.989
Chr1L	28209370	28209871	L_dist_noab_576	distal_noab_high	0.665	0.207	0.573	0.343	1.153	0.434	0.954	0	0	0	2.107	3.427	0.659
Chr1L	28210554	28211055	L_dist_noab_577	distal_noab_high	0.554	0.828	0.86	0.686	0.128	1.156	0.954	0	0	8.334	2.107	1.428	0.659
Chr1L	28211733	28212234	L_dist_noab_578	distal_noab_high	0.333	0.414	0.287	0.686	0.512	0.434	0.191	0	0	0	3.311	1.999	0.659
Chr1L	28212867	28213368	L_dist_noab_579	distal_noab_high	0.444	0.621	0.43	0	0.384	0.434	0.381	0	1.97	0	2.107	2.57	0.33
Chr1L	28217399	28217900	L_dist_lo_580	distal_low_conf	0.333	1.035	0.86	1.03	0.768	0.867	2.67	0	0	0	1.505	1.428	0.989
Chr1L	28218236	28218737	L_dist_hi_581	distal_high_conf	0.222	3.518	2.15	2.746	0.384	3.179	5.912	0	9.852	0	7.825	8.282	3.295
Chr1L	28220212	28220713	L_dist_hi_582	distal_high_conf	0.554	4.76	3.727	3.776	0.897	5.636	8.01	4.053	0	0	7.825	5.997	4.614
Chr1L	28221459	28221960	L_dist_noab_583	distal_noab_high	0.554	1.656	1.433	1.373	0.128	3.035	4.959	4.053	0	0	2.107	3.141	0.989
Chr1L	28223161	28223662	L_dist_hi_584	distal_high_conf	0.222	1.656	2.724	2.403	0.897	4.046	4.577	0	7.882	0	6.922	7.14	5.602
Chr1L	28421404	28421905	L_dist_lo_585	distal_low_conf	0.333	1.035	1.003	1.03	0.64	0.434	0.763	0	0	0	1.204	1.714	0.33
Chr1L	28735061	28735562	L_dist_hi_586	distal_high_conf	0.111	1.242	1.577	1.716	1.793	1.156	4.768	4.053	0	0	2.408	1.999	1.648
Chr1L	28735536	28736037	L_dist_lo_587	distal_low_conf	0.554	2.276	3.154	2.403	0.897	1.734	4.196	0	0	16.667	4.815	2.856	0.659
Chr1L	28841715	28842216	L_dist_noab_588	distal_noab_high	0.111	0	0	0	0.256	0.289	0	0	3.941	0	0.903	1.428	1.648
Chr1L	28903564	28904065	L_prox_hi_589	proximal_high_conf	0.444	0.828	1.577	3.089	2.177	1.156	1.526	4.053	1.97	0	1.806	3.713	2.636
Chr1L	28978388	28978889	L_dist_lo_590	distal_low_conf	0.444	1.242	1.577	0.686	0.64	0.578	0.763	0	0	0	1.204	1.428	0.989
Chr1L	29062987	29063488	L_dist_lo_591	distal_low_conf	0.333	1.863	0.717	0.343	0.384	2.023	3.624	4.053	0	0	3.311	3.141	1.977
Chr1L	29082730	29083231	L_dist_noab_592	distal_noab_high	0.554	1.035	1.72	0.686	0.512	2.023	3.051	0	1.97	0	4.213	3.713	1.318
Chr1L	29130678	29131179	L_dist_noab_593	distal_noab_high	0.444	1.449	1.147	0.343	0.384	1.445	1.716	4.053	0	0	3.311	3.427	0.989
Chr1L	29142163	29142664	L_dist_noab_594	distal_noab_high	0.665	1.035	0.573	0	1.281	0.145	0.381	0	0	0	1.505	1.999	1.318
Chr1L	29144651	29145152	L_prox_hi_595	proximal_high_conf	0.111	2.897	2.007	1.03	1.537	1.012	1.335	4.053	7.882	16.667	8.126	8.568	6.92
Chr1L	29145132	29145633	L_prox_hi_596	proximal_high_conf	0.554	1.449	3.727	2.746	1.025	1.012	2.289	0	11.823	0	3.612	1.999	1.318
Chr1L	29145483	29145984	L_prox_lo_597	proximal_low_conf	0.333	0.828	1.864	1.03	0.512	1.156	1.526	0	1.97	0	2.408	2.285	2.307
Chr1L	29146220	29146721	L_prox_hi_598	proximal_high_conf	0.444	1.863	2.867	1.373	0.897	1.734	2.098	0	9.852	8.334	1.505	3.141	1.318
Chr1L	29146387	29146888	L_prox_hi_599	proximal_high_conf	0.444	2.69	4.587	2.059	1.281	2.168	2.861	0	7.882	8.334	2.107	2.856	1.648
Chr1L	29146909	29147410	L_prox_hi_600	proximal_high_conf	0.554	2.69	6.737	2.746	1.665	1.879	3.433	0	1.97	0	6.922	5.997	5.273
Chr1L	29147401	29147902	L_prox_hi_601	proximal_high_conf	0.776	2.69	3.154	2.059	1.281	1.59	4.386	0	11.823	0	3.912	4.855	2.966
Chr1L	29148048	29148549	L_prox_lo_602	proximal_low_conf	0.111	1.656	2.294	0.343	0.768	2.023	1.907	12.158	0	0	6.621	6.854	3.625
Chr1L	29173558	29174059	L_dist_noab_603	distal_noab_high	0.444	1.242	0.287	1.03	0.384	0.289	1.144	0	0	0	0.602	1.999	0.989
Chr1L	29268633	29269134	L_dist_lo_604	distal_low_conf	0.222	1.656	0.573	0	0.512	1.012	0.572	0	0	0	1.204	1.999	0.989
Chr1L	29280773	29281274	L_prox_hi_605	proximal_high_conf	0.333	1.035	0.573	2.746	1.153	0.867	1.144	0	0	0	1.505	3.427	2.636
Chr1L	29384946	29385447	L_prox_hi_606	proximal_high_conf	0.444	1.242	0.86	2.403	1.025	1.734	1.716	0	3.941	0	5.116	2.57	4.614
Chr1L	29424050	29424551	L_dist_noab_607	distal_noab_high	0.776	1.863	1.72	0.686	0.64	1.301	0.954	0	0	0	2.107	2.856	0.33
Chr1L	29440689	29441190	L_dist_lo_608	distal_low_conf	0.222	0.414	0.573	0.343	0.897	0.867	0.763	0	0	0	3.01	2.285	0.989
Chr1L	29461125	29461626	L_dist_hi_609	distal_high_conf	0.111	3.311	3.01	1.373	1.537	1.59	0.763	4.053	1.97	0	8.126	7.425	6.261
Chr1L	29578708	29579209	L_dist_noab_610	distal_noab_high	0.554	1.035	1.147	1.373	0.64	1.301	1.335	8.106	0	0	2.107	2.856	1.318
Chr1L	29603200	29603701	L_prox_lo_611	proximal_low_conf	0.333	1.863	2.15	2.746	0.128	1.445	2.289	4.053	5.911	0	2.408	3.427	0.659
Chr1L	29603434	29603935	L_prox_hi_612	proximal_high_conf	0.333	2.483	1.577	2.403	1.025	1.301	1.716	4.053	3.941	0	3.311	3.713	1.318
Chr1L	29603764	29604265	L_prox_hi_613	proximal_high_conf	0.222	1.242	0.717	1.03	1.153	0.867	1.144	4.053	1.97	0	3.912	4.569	1.648
Chr1L	29654634	29655135	L_dist_noab_614	distal_noab_high	0.444	0.207	0.573	1.03	1.025	0.578	0	0	0	0	2.408	3.141	0.659
Chr1L	30085067	30085568	L_dist_lo_615	distal_low_conf	0.776	1.242	2.007	3.776	1.025	1.879	3.242	0	3.941	0	1.505	5.997	1.648
Chr1L	30137149	30137650	L_dist_lo_616	distal_low_conf	0	0.207	0	0.686	0	0.145	0.191	4.053	0	0	1.204	1.142	0.989
Chr1L	30213771	30214272	L_dist_noab_617	distal_noab_high	0.665	0.207	0.86	0.686	0.897	0.867	0.572	0	1.97	0	2.107	3.427	0
Chr1L	30215166	30215667	L_prox_lo_618	proximal_low_conf	0.887	2.483	2.867	1.716	1.281	2.168	3.051	4.053	3.941	0	4.213	5.712	2.636
Chr1L	30386913	30387414	L_dist_lo_619	distal_low_conf	0.111	0.414	1.433	0.686	0.768	1.012	1.526	0	1.97	0	0.602	3.713	1.318
Chr1L	30392223	30392724	L_dist_noab_620	distal_noab_high	0.444	1.863	0.86	0.343	0.128	1.012	2.098	0	1.97	0	2.709	1.714	0.659
Chr1L	30394328	30394829	L_dist_lo_621	distal_low_conf	0.222	0.414	0.717	1.373	0.897	0.289	0.763	0	0	0	1.204	0.571	1.318
Chr1L	30534329	30534830	L_dist_hi_622	distal_high_conf	0.333	1.035	1.433	1.03	0.256	0.867	2.289	4.053	0	0	1.806	3.998	2.307
Chr1L	30540307	30540808	L_dist_lo_623	distal_low_conf	0.222	0.414	1.147	0.686	0.384	0.145	0.763	0	0	0	1.505	1.142	1.318
Chr1L	31021383	31021884	L_prox_lo_624	proximal_low_conf	0.776	3.725	2.867	1.716	0.897	1.59	2.861	0	9.852	0	1.505	3.998	0.989
Chr1L	31021703	31022204	L_prox_hi_625	proximal_high_conf	0.554	2.069	2.724	1.716	0.64	1.301	2.861	0	7.882	0	2.709	3.427	1.648
Chr1L	31063719	31064220	L_dist_noab_626	distal_noab_high	0.111	0.414	0.143	0	0.128	0.289	0	0	0	0	0.903	0.857	0.659
Chr1L	31110195	31110696	L_dist_lo_627	distal_low_conf	0.333	2.69	1.72	0.686	0.512	1.879	2.861	0	3.941	0	2.107	1.999	1.648
Chr1L	31115431	31115932	L_dist_lo_628	distal_low_conf	0.333	0.621	0.717	0.686	1.409	0.723	0.381	0	1.97	0	2.709	1.714	2.307
Chr1L	31120005	31120506	L_prox_lo_629	proximal_low_conf	0.665	2.276	1.864	1.716	1.409	0.867	0.954	8.106	3.941	0	3.311	3.427	1.318
Chr1L	31120477	31120978	L_prox_noab_630	proximal_noab_high	0.554	1.863	1.433	0	1.153	0.289	0.954	0	5.911	0	2.408	3.141	4.284
Chr1L	31382954	31383455	L_dist_noab_631	distal_noab_high	0.444	0.621	0.287	0.686	0.256	0.578	0.763	0	1.97	0	1.204	1.142	0.659
Chr1L	31448155	31448656	L_dist_noab_632	distal_noab_high	0.665	0.207	0.573	1.03	0.384	0.578	1.716	0	3.941	0	2.107	3.141	0.659
Chr1L	31457795	31458296	L_dist_hi_633	distal_high_conf	0.333	1.863	1.577	1.03	0.64	0.867	4.386	4.053	1.97	0	2.107	3.141	1.318
Chr1L	31475435	31475936	L_dist_noab_634	distal_noab_high	0.444	0.621	0.43	0	0.384	1.012	1.144	0	0	0	0.903	2.856	1.648
Chr1L	31476094	31476595	L_dist_noab_635	distal_noab_high	0.554	1.035	0.717	0	0.512	1.445	2.098	0	0	0	0.602	2.285	1.648
Chr1L	31477766	31478267	L_dist_noab_636	distal_noab_high	0.665	1.035	3.154	0.686	0.256	4.191	6.103	0	1.97	0	5.116	10.281	1.648
Chr1L	31519872	31520373	L_dist_lo_637	distal_low_conf	0.776	2.276	2.724	1.03	0.768	2.312	3.624	4.053	1.97	0	3.612	5.426	3.295
Chr1L	31547318	31547819	L_dist_lo_638	distal_low_conf	0.111	0.621	1.003	1.373	0.512	1.156	2.861	0	0	0	5.116	2.57	1.977
Chr1L	31708393	31708894	L_prox_hi_639	proximal_high_conf	0.333	3.104	3.584	2.403	0.897	1.445	1.335	0	0	0	3.311	4.569	6.92
Chr1L	31931270	31931771	L_prox_noab_640	proximal_noab_high	0.333	0.207	0.86	0.343	0.512	0.434	0.191	0	0	8.334	0.903	1.142	1.648
Chr1L	31957903	31958404	L_dist_noab_641	distal_noab_high	0.333	0.207	0.143	0.343	0.128	0.723	0.191	0	1.97	0	1.204	1.714	1.318
Chr1L	32077167	32077668	L_prox_hi_642	proximal_high_conf	0.222	2.69	1.29	1.03	1.921	1.59	1.335	4.053	5.911	0	2.408	3.141	1.977
Chr1L	32077550	32078051	L_prox_hi_643	proximal_high_conf	0.333	1.656	1.72	1.716	1.409	1.59	1.716	4.053	5.911	0	4.213	4.284	2.636
Chr1L	32472557	32473058	L_prox_noab_644	proximal_noab_high	0.776	1.242	0.717	1.716	1.153	0.145	0.572	0	1.97	0	2.408	3.713	2.966
Chr1L	32476407	32476908	L_dist_noab_645	distal_noab_high	0.222	0.828	0.43	0	0.512	0.578	0.763	0	1.97	0	2.107	1.428	0.989
Chr1L	32683011	32683512	L_dist_noab_646	distal_noab_high	0.333	0.414	0	0	0.768	0.145	0.954	0	0	0	1.204	1.714	0.989
Chr1L	33306983	33307484	L_dist_lo_647	distal_low_conf	0.111	0.207	0.43	0	0.512	0.723	0.191	0	0	0	1.204	1.714	0.659
Chr1L	33328358	33328859	L_dist_noab_648	distal_noab_high	0.665	0.828	2.724	1.03	0.897	0.434	0.191	4.053	3.941	0	3.311	3.141	2.966
Chr1L	33376156	33376657	L_dist_lo_649	distal_low_conf	0	1.035	0.717	1.716	0.64	0.578	0.572	0	1.97	0	1.204	1.428	2.307
Chr1L	33382384	33382885	L_dist_lo_650	distal_low_conf	0.444	3.518	2.437	1.03	0.768	2.168	4.959	0	1.97	0	1.505	0.857	0.989
Chr1L	33386769	33387270	L_dist_noab_651	distal_noab_high	1.552	1.242	1.147	1.716	1.793	2.457	1.144	4.053	0	0	2.408	3.998	1.648
Chr1L	33390734	33391235	L_dist_noab_652	distal_noab_high	1.774	0.621	1.864	2.403	4.098	1.879	1.716	0	5.911	0	4.213	4.284	3.954
Chr1L	33403092	33403593	L_dist_noab_653	distal_noab_high	0.554	1.863	1.147	1.03	0.384	0.578	0.572	0	0	0	1.204	2.856	0.659
Chr1L	33406901	33407402	L_prox_hi_654	proximal_high_conf	0.222	1.863	4.014	2.059	1.793	4.046	3.814	4.053	1.97	0	1.806	2.285	1.648
Chr1L	33407252	33407753	L_prox_hi_655	proximal_high_conf	0.554	4.346	6.164	2.746	2.69	3.757	3.624	4.053	0	0	3.612	5.141	3.295
Chr1L	33407613	33408114	L_prox_hi_656	proximal_high_conf	0.554	4.346	5.161	2.403	1.921	1.734	2.67	12.158	7.882	8.334	10.534	14.28	10.545
Chr1L	33412789	33413290	L_dist_noab_657	distal_noab_high	0.776	0.621	0.287	0.343	0.897	0.578	0.381	0	0	0	1.806	1.714	2.966
Chr1L	33445776	33446277	L_dist_noab_658	distal_noab_high	1.109	2.897	3.154	1.373	0.768	1.301	3.624	0	0	0	4.213	2.856	1.648
Chr1L	33458964	33459465	L_dist_lo_659	distal_low_conf	0.333	2.897	3.87	0.686	0.768	0.867	2.67	0	1.97	0	3.612	3.141	1.977
Chr1L	33492104	33492605	L_prox_hi_660	proximal_high_conf	0.444	2.483	3.297	1.373	1.025	1.445	1.907	0	1.97	0	8.427	7.425	4.943
Chr1L	33493410	33493911	L_dist_noab_661	distal_noab_high	0.776	1.035	2.294	0.686	0.512	1.734	3.624	0	0	0	3.612	3.427	1.977
Chr1L	33497008	33497509	L_dist_hi_662	distal_high_conf	0.554	1.656	1.433	1.716	0.512	1.879	4.768	0	1.97	0	3.912	2.285	1.648
Chr1L	33501630	33502131	L_prox_lo_663	proximal_low_conf	0.111	1.035	0.287	0	0.64	1.734	1.335	0	0	0	2.408	2.285	1.648
Chr1L	33549291	33549792	L_dist_noab_664	distal_noab_high	0.333	0.621	0.573	0.343	0.256	0.867	1.335	4.053	0	0	1.204	1.142	2.966
Chr1L	33554385	33554886	L_dist_noab_665	distal_noab_high	0.444	0.414	0.573	0	0.64	0.289	0.191	0	3.941	0	0.903	1.714	1.318
Chr1L	33555049	33555550	L_dist_lo_666	distal_low_conf	0	0	0.143	0	0.384	0.145	0.572	0	0	0	0.903	1.714	1.977
Chr1L	33588318	33588819	L_prox_hi_667	proximal_high_conf	0.333	2.483	1.147	1.373	1.153	0.578	1.144	0	0	0	2.709	2.57	2.636
Chr1L	33588629	33589130	L_prox_hi_668	proximal_high_conf	0.444	3.518	1.003	1.716	1.025	1.156	1.335	4.053	1.97	0	3.01	3.141	3.295
Chr1L	33627341	33627842	L_prox_hi_669	proximal_high_conf	0.222	2.276	4.731	3.432	1.537	1.734	1.526	12.158	3.941	8.334	4.815	6.569	6.92
Chr1L	33627853	33628354	L_prox_hi_670	proximal_high_conf	0.111	1.242	2.58	2.059	1.153	1.301	2.098	0	1.97	0	2.107	2.856	2.636
Chr1L	33688949	33689450	L_prox_lo_671	proximal_low_conf	0.887	2.897	1.72	1.716	1.281	1.734	1.907	0	3.941	0	2.107	2.856	4.614
Chr1L	33737695	33738196	L_dist_hi_672	distal_high_conf	0.333	3.104	1.29	1.03	0.512	0.867	2.289	0	3.941	0	2.107	2.285	2.636
Chr1L	33742129	33742630	L_prox_hi_673	proximal_high_conf	0.887	1.863	2.294	2.059	1.665	3.035	4.959	4.053	7.882	0	3.311	6.283	3.954
Chr1L	33810160	33810661	L_dist_noab_674	distal_noab_high	0.887	0.207	0.86	0.343	0.256	0.723	0.572	0	0	0	0.903	2.285	1.648
Chr1L	33867994	33868495	L_dist_lo_675	distal_low_conf	0.111	0.207	0.86	0	0.64	0.578	0.572	0	3.941	8.334	3.311	2.57	1.648
Chr1L	33885835	33886336	L_dist_noab_676	distal_noab_high	0.554	1.449	2.007	0.343	0.768	2.746	2.861	0	0	0	1.806	4.284	3.295
Chr1L	33899310	33899811	L_dist_lo_677	distal_low_conf	0.554	2.069	1.864	1.03	1.153	2.601	4.196	4.053	1.97	0	3.912	4.284	2.307
Chr1L	33902725	33903226	L_dist_hi_678	distal_high_conf	0.444	2.276	1.72	1.716	1.281	2.023	0.954	0	1.97	0	4.815	5.712	7.579
Chr1L	33906620	33907121	L_prox_hi_679	proximal_high_conf	0.554	1.656	1.577	1.716	0.768	2.746	1.907	4.053	5.911	0	6.019	5.426	5.273
Chr1L	33906978	33907479	L_prox_hi_680	proximal_high_conf	0.444	2.069	2.294	2.059	1.153	3.324	3.433	4.053	3.941	0	2.709	6.854	2.636
Chr1L	33907167	33907668	L_prox_hi_681	proximal_high_conf	0.222	1.449	1.864	1.373	1.409	2.168	2.861	0	3.941	0	3.01	5.712	1.648
Chr1L	33937123	33937624	L_dist_noab_682	distal_noab_high	0.665	1.449	1.864	0.686	0.384	1.879	3.051	0	0	0	4.514	3.427	1.977
Chr1L	34029004	34029505	L_dist_noab_683	distal_noab_high	0.333	0.207	0.717	0	1.281	0.723	0.954	4.053	0	0	1.505	2.285	0.989
Chr1L	34069783	34070284	L_prox_hi_684	proximal_high_conf	0.554	2.897	1.72	2.059	2.433	1.59	1.907	0	1.97	0	5.718	6.283	4.943
Chr1L	34161364	34161865	L_prox_hi_685	proximal_high_conf	0.554	3.932	3.87	2.059	2.177	2.168	3.624	12.158	5.911	0	5.116	3.713	8.568
Chr1L	34161908	34162409	L_prox_hi_686	proximal_high_conf	0.665	3.518	3.584	1.373	2.049	3.613	3.814	8.106	5.911	8.334	4.815	5.426	2.636
Chr1L	35136173	35136674	L_prox_lo_687	proximal_low_conf	0.665	2.69	2.007	1.716	0.768	1.301	2.67	4.053	3.941	0	4.514	2.57	0.989
Chr1L	35136955	35137456	L_prox_hi_688	proximal_high_conf	0.111	1.449	2.724	2.403	1.025	0.867	2.098	0	5.911	0	1.505	3.427	1.318
Chr1L	35137660	35138161	L_prox_hi_689	proximal_high_conf	0.222	2.69	5.734	2.403	1.537	2.601	3.624	0	1.97	0	6.32	7.14	2.966
Chr1L	35137964	35138465	L_prox_hi_690	proximal_high_conf	0.333	3.518	4.731	2.403	1.153	2.023	3.814	4.053	5.911	0	5.417	6.854	2.307
Chr1L	35138344	35138845	L_dist_hi_691	distal_high_conf	0.665	4.139	5.734	2.746	2.305	3.035	3.624	0	7.882	0	6.019	5.426	2.966
Chr1L	35139378	35139879	L_prox_hi_692	proximal_high_conf	0.222	2.069	2.294	0.343	1.409	0.578	1.335	0	0	25.001	4.815	3.713	2.307
Chr1L	35139821	35140322	L_prox_hi_693	proximal_high_conf	0	3.932	3.297	2.746	1.537	1.156	2.861	4.053	3.941	8.334	4.514	7.997	2.966
Chr1L	35140164	35140665	L_prox_hi_694	proximal_high_conf	0.222	3.725	3.87	4.119	1.665	2.312	3.433	12.158	7.882	0	3.311	3.141	3.625
Chr1L	35140905	35141406	L_prox_hi_695	proximal_high_conf	0.111	2.069	2.724	2.746	1.921	2.457	3.433	0	0	0	5.718	5.997	6.261
Chr1L	35142046	35142547	L_dist_lo_696	distal_low_conf	0.222	1.242	0.86	1.03	0.384	1.156	2.289	0	0	0	2.408	1.999	2.636
Chr1L	35142386	35142887	L_dist_lo_697	distal_low_conf	0.222	1.242	1.147	0.686	0.64	0.434	1.526	0	0	0	2.107	3.427	1.318
Chr1L	35143179	35143680	L_dist_noab_698	distal_noab_high	0.554	1.035	0.287	1.03	0.512	1.301	1.144	0	0	8.334	2.408	3.141	0.33
Chr1L	35174777	35175278	L_dist_hi_699	distal_high_conf	0.776	2.69	2.007	3.432	0.64	3.179	3.433	0	0	8.334	6.32	5.997	2.966
Chr1L	35230478	35230979	L_dist_noab_700	distal_noab_high	0.665	0.414	0.717	1.373	0.512	0.289	0.191	0	0	0	2.107	1.999	0.659
Chr1L	35334376	35334877	L_dist_lo_701	distal_low_conf	1.22	4.346	3.727	2.403	0.64	3.035	4.005	0	0	8.334	3.01	4.284	2.307
Chr1L	35982357	35982858	L_dist_lo_702	distal_low_conf	0.222	0.621	0.86	0.686	0.128	0.434	0.572	0	1.97	0	2.709	2.856	0.33
Chr1L	36335817	36336318	L_dist_noab_703	distal_noab_high	0.554	0.621	0.287	0.343	0.64	0.289	0.763	0	1.97	0	1.204	0.857	1.318
Chr1L	36457458	36457959	L_prox_hi_704	proximal_high_conf	0.665	1.449	1.433	2.403	0.897	0.867	1.526	4.053	0	0	2.408	1.428	2.307
Chr1L	36460145	36460646	L_dist_hi_705	distal_high_conf	0.333	3.311	3.297	1.716	1.537	1.59	1.716	16.211	5.911	8.334	5.116	4.284	6.261
Chr1L	36538383	36538884	L_dist_noab_706	distal_noab_high	0.776	1.242	0.573	0.686	0.384	1.012	1.526	0	0	0	1.806	2.57	1.648
Chr1L	36578531	36579032	L_prox_hi_707	proximal_high_conf	0.333	2.276	3.01	3.776	0.64	2.168	3.433	8.106	0	8.334	3.612	4.569	2.966
Chr1L	36580786	36581287	L_dist_noab_708	distal_noab_high	0.554	0	1.29	1.03	0.128	0.578	1.526	0	0	0	1.204	2.856	0.989
Chr1L	36585526	36586027	L_dist_noab_709	distal_noab_high	0.776	1.035	0.717	1.03	1.153	2.168	1.526	0	0	0	3.612	3.141	2.636
Chr1L	36591200	36591701	L_dist_lo_710	distal_low_conf	0.554	2.276	4.157	2.746	1.153	0.723	4.386	0	1.97	0	2.107	3.141	0.989
Chr1L	36592867	36593368	L_dist_hi_711	distal_high_conf	0.444	2.069	3.727	1.716	1.025	1.879	4.005	0	1.97	0	1.505	2.57	1.648
Chr1L	36596022	36596523	L_dist_lo_712	distal_low_conf	0.998	3.104	4.014	2.746	0.64	4.335	6.866	4.053	0	0	2.408	2.57	1.977
Chr1L	36599390	36599891	L_dist_lo_713	distal_low_conf	0.554	3.932	7.311	1.03	0.64	4.624	4.768	0	1.97	0	2.408	3.998	2.636
Chr1L	36600618	36601119	L_dist_lo_714	distal_low_conf	0.333	3.311	5.304	2.746	1.153	4.913	6.294	0	0	0	0.301	3.713	2.307
Chr1L	36600939	36601440	L_dist_hi_715	distal_high_conf	0.554	1.656	4.874	1.716	0.768	3.324	5.531	4.053	0	0	1.806	2.285	1.318
Chr1L	36605609	36606110	L_dist_lo_716	distal_low_conf	0.554	1.656	1.864	0.686	0.512	1.879	3.242	0	0	0	1.806	3.427	0.989
Chr1L	36606336	36606837	L_dist_hi_717	distal_high_conf	0.111	1.656	1.29	1.03	0.768	2.457	5.149	0	0	0	3.311	4.855	2.966
Chr1L	36610090	36610591	L_dist_noab_718	distal_noab_high	0.554	1.242	1.003	0.343	0.768	1.445	1.526	0	0	0	1.806	2.57	1.318
Chr1L	36623496	36623997	L_dist_noab_719	distal_noab_high	0.222	0.621	0.573	0	0.128	0.723	0.191	0	1.97	0	1.505	1.714	1.318
Chr1L	36661895	36662396	L_prox_hi_720	proximal_high_conf	0.111	2.483	2.58	1.03	1.793	0.578	1.335	4.053	3.941	0	3.912	4.284	5.602
Chr1L	36670952	36671453	L_prox_hi_721	proximal_high_conf	0.333	2.897	2.724	1.373	1.153	1.301	1.144	0	3.941	0	5.116	3.141	3.625
Chr1L	36703075	36703576	L_dist_lo_722	distal_low_conf	0.222	2.69	0.573	0.343	1.153	0.578	1.526	0	3.941	0	3.01	5.997	5.602
Chr1L	36731347	36731848	L_prox_hi_723	proximal_high_conf	0.333	1.863	1.864	1.373	2.305	1.734	1.144	4.053	1.97	0	3.612	8.853	6.92
Chr1L	37121980	37122481	L_prox_hi_724	proximal_high_conf	0.444	2.483	4.731	2.059	1.537	1.012	2.289	4.053	7.882	0	2.709	6.569	3.954
Chr1L	37157840	37158341	L_prox_hi_725	proximal_high_conf	0.222	1.035	1.003	0.343	1.025	0.578	0.572	4.053	3.941	0	2.408	4.855	2.307
Chr1L	37207098	37207599	L_prox_lo_726	proximal_low_conf	0.222	1.863	1.003	1.03	0.768	0.289	1.526	0	1.97	0	0.903	2.57	1.977
Chr1L	37288129	37288630	L_prox_hi_727	proximal_high_conf	0.554	4.76	3.154	2.059	1.281	1.301	2.67	0	3.941	0	3.912	4.569	5.932
Chr1L	37304399	37304900	L_prox_hi_728	proximal_high_conf	0.444	2.483	2.867	0.686	1.281	0.867	1.526	0	7.882	0	4.815	4.284	1.318
Chr1L	37305399	37305900	L_prox_lo_729	proximal_low_conf	0.554	0.828	2.437	3.089	1.025	0.289	0.954	8.106	1.97	0	1.806	2.856	0.989
Chr1L	37312697	37313198	L_dist_lo_730	distal_low_conf	0.444	1.863	2.294	2.059	0.64	0.867	2.098	4.053	0	0	0.903	2.856	2.636
Chr1L	37378508	37379009	L_dist_lo_731	distal_low_conf	0.111	0.414	0.143	0	0.768	0.289	0.381	0	0	0	0.602	1.714	0.33
Chr1L	37399882	37400383	L_prox_hi_732	proximal_high_conf	0.554	2.276	1.577	2.059	0.768	1.301	3.433	4.053	3.941	0	4.213	6.283	7.909
Chr1L	37421303	37421804	L_prox_lo_733	proximal_low_conf	0.554	2.069	1.577	1.03	1.537	1.012	1.907	0	5.911	0	2.107	1.999	0.989
Chr1L	37421919	37422420	L_prox_hi_734	proximal_high_conf	0.776	3.725	2.867	3.776	1.153	1.445	2.289	4.053	1.97	8.334	8.427	9.139	6.92
Chr1L	37424021	37424522	L_dist_noab_735	distal_noab_high	0.554	0.207	0.43	1.373	0.768	0.434	0.381	4.053	0	0	1.806	1.428	2.307
Chr1L	37432860	37433361	L_prox_hi_736	proximal_high_conf	0.222	1.656	2.294	1.03	1.537	1.301	1.716	0	7.882	0	2.709	3.713	3.625
Chr1L	37433611	37434112	L_prox_lo_737	proximal_low_conf	0.222	0.414	1.003	1.373	0.512	0.578	0.191	0	0	0	1.806	0.571	2.307
Chr1L	37531158	37531659	L_prox_lo_738	proximal_low_conf	0.665	2.069	2.15	1.373	0.64	2.023	2.289	4.053	3.941	0	1.204	3.713	1.977
Chr1L	37531731	37532232	L_prox_hi_739	proximal_high_conf	0	2.69	1.433	0.686	1.153	0.867	2.861	0	0	0	3.612	3.141	3.625
Chr1L	37666328	37666829	L_dist_noab_740	distal_noab_high	0.222	0.207	0	0	0.384	0.145	1.144	0	0	0	1.806	1.142	1.648
Chr1L	37680549	37681050	L_prox_lo_741	proximal_low_conf	0.665	1.449	2.724	1.03	1.153	2.312	3.433	4.053	3.941	0	2.408	3.141	4.284
Chr1L	37683297	37683798	L_dist_hi_742	distal_high_conf	0.222	3.104	6.451	1.716	0.897	4.335	4.577	4.053	0	0	5.116	6.854	2.966
Chr1L	37687583	37688084	L_dist_lo_743	distal_low_conf	0.444	0.621	1.72	1.373	0.64	1.734	0.954	0	0	0	2.408	2.57	0.33
Chr1L	37750828	37751329	L_dist_hi_744	distal_high_conf	0.554	2.276	1.864	0.686	1.281	1.734	1.716	0	0	0	1.204	1.714	3.295
Chr1L	37787120	37787621	L_dist_lo_745	distal_low_conf	0.111	1.035	1.003	0.343	0.897	1.156	0.191	4.053	3.941	0	5.417	5.141	4.943
Chr1L	37791427	37791928	L_dist_hi_746	distal_high_conf	0.554	2.069	2.58	1.373	0.897	2.601	4.005	0	0	0	3.01	4.284	1.318
Chr1L	37825018	37825519	L_dist_hi_747	distal_high_conf	0.222	2.69	1.864	1.716	0.64	0.723	1.144	4.053	1.97	0	3.01	2.57	2.307
Chr1L	37828858	37829359	L_dist_lo_748	distal_low_conf	0.222	1.242	0.717	1.03	0.384	0.578	0.381	0	1.97	0	0.903	1.428	1.318
Chr1L	37833235	37833736	L_dist_noab_749	distal_noab_high	0.665	0.207	0.717	0.343	1.153	0	1.144	0	0	0	1.204	1.142	0.659
Chr1L	37837272	37837773	L_dist_lo_750	distal_low_conf	0.444	2.069	1.29	0.686	0.768	1.59	1.526	0	0	0	1.806	2.856	0.989
Chr1L	37838612	37839113	L_dist_noab_751	distal_noab_high	0.333	0.621	0.573	0.686	0.512	0.867	1.526	4.053	1.97	8.334	0.903	1.714	1.318
Chr1L	37970974	37971475	L_dist_noab_752	distal_noab_high	0.554	1.863	1.003	0.686	1.025	2.023	2.098	0	1.97	0	1.806	2.856	3.295
Chr1L	37982505	37983006	L_dist_noab_753	distal_noab_high	0.887	3.311	1.864	0.686	1.025	1.59	2.67	0	0	0	2.408	6.283	5.932
Chr1L	37989485	37989986	L_dist_noab_754	distal_noab_high	0.665	0.828	0.573	1.03	0.768	0.867	0.763	0	1.97	0	3.311	4.284	2.636
Chr1L	37997672	37998173	L_prox_noab_755	proximal_noab_high	0.554	0.828	0.717	1.373	1.409	1.012	0.954	0	0	0	2.709	1.714	2.636
Chr1L	38003269	38003770	L_prox_noab_756	proximal_noab_high	0.665	1.449	1.577	1.373	0.64	0.578	0.381	0	0	8.334	2.107	1.428	1.318
Chr1L	38003829	38004330	L_prox_hi_757	proximal_high_conf	0.111	2.897	2.15	1.03	2.305	0.723	0.381	4.053	3.941	0	2.408	1.142	1.977
Chr1L	38004465	38004966	L_prox_lo_758	proximal_low_conf	0.554	2.897	1.147	2.403	1.025	0.434	0	4.053	1.97	0	1.806	3.141	0.659
Chr1L	38043356	38043857	L_dist_lo_759	distal_low_conf	0.444	1.242	1.864	0.686	0.768	2.023	2.098	4.053	0	0	1.505	3.427	2.307
Chr1L	38052042	38052543	L_prox_hi_760	proximal_high_conf	0.444	1.242	1.577	2.059	2.433	0.578	1.526	4.053	5.911	0	5.417	4.284	3.295
Chr1L	38052425	38052926	L_prox_hi_761	proximal_high_conf	0.444	1.863	1.147	1.373	1.921	0.578	1.526	0	1.97	0	2.709	1.999	1.648
Chr1L	38053324	38053825	L_dist_noab_762	distal_noab_high	0.333	0.414	0.717	0.686	0.64	0.145	0.381	0	0	0	0.903	1.999	2.966
Chr1L	38220261	38220762	L_dist_noab_763	distal_noab_high	0.665	0.828	0.717	0	1.025	2.312	1.907	0	0	0	1.204	2.57	1.977
Chr1L	38227119	38227620	L_dist_noab_764	distal_noab_high	0.554	0.828	0.43	0.343	0.64	1.156	0.572	0	1.97	0	1.505	3.141	0.989
Chr1L	38245408	38245909	L_dist_noab_765	distal_noab_high	0.333	0.828	0.573	1.03	0.256	0.867	0.763	0	1.97	0	0.903	0.857	1.318
Chr1L	38430638	38431139	L_prox_hi_766	proximal_high_conf	0	3.518	2.007	2.403	1.665	1.301	1.716	0	3.941	0	2.107	3.998	3.295
Chr1L	38467761	38468262	L_prox_hi_767	proximal_high_conf	0.333	2.276	2.58	3.089	1.793	2.023	1.526	8.106	1.97	0	4.815	3.998	7.579
Chr1L	38592439	38592940	L_prox_hi_768	proximal_high_conf	0.222	2.276	1.147	0.343	1.281	1.301	0.572	4.053	0	0	1.806	4.284	2.307
Chr1L	38616168	38616669	L_dist_noab_769	distal_noab_high	0.776	0.414	0.287	1.03	1.153	0.723	0.381	0	0	8.334	0.602	1.714	1.977
Chr1L	38631936	38632437	L_dist_noab_770	distal_noab_high	0.554	0.414	0.287	0.343	1.025	0.578	0.191	0	0	0	2.408	1.428	0.33
Chr1L	38654807	38655308	L_prox_noab_771	proximal_noab_high	0.444	1.449	0.573	0.343	1.281	0.578	0.763	4.053	3.941	0	3.311	3.427	2.636
Chr1L	38655698	38656199	L_prox_lo_772	proximal_low_conf	0.333	0.828	1.864	0	1.153	1.012	2.098	0	1.97	0	2.107	2.57	1.648
Chr1L	38674894	38675395	L_dist_lo_773	distal_low_conf	0.222	0.621	0.717	0.686	0.256	0.578	0.572	0	0	0	1.204	1.142	0.659
Chr1L	38822227	38822728	L_dist_lo_774	distal_low_conf	0.333	1.656	2.15	0.686	0.256	1.156	1.716	0	0	0	1.204	3.713	1.977
Chr1L	38833562	38834063	L_prox_lo_775	proximal_low_conf	0.665	2.276	2.58	1.373	1.153	0.723	0.763	4.053	0	0	2.107	1.714	2.307
Chr1L	38834120	38834621	L_prox_hi_776	proximal_high_conf	0.665	2.483	2.867	1.716	1.537	1.445	3.051	8.106	5.911	0	5.417	3.427	3.295
Chr1L	39097571	39098072	L_dist_noab_777	distal_noab_high	0.887	1.863	0.143	2.403	1.153	1.012	2.098	0	0	0	1.806	1.999	2.307
Chr1L	39184795	39185296	L_prox_noab_778	proximal_noab_high	0.554	1.449	1.864	0	1.025	0.723	1.716	0	1.97	0	3.01	4.284	1.648
Chr1L	39489960	39490461	L_prox_hi_779	proximal_high_conf	0.222	1.449	1.577	0	1.025	1.012	0.572	4.053	0	8.334	1.204	1.999	3.295
Chr1L	39490716	39491217	L_prox_noab_780	proximal_noab_high	0.554	0.621	0.43	0.343	1.025	0.289	0	0	1.97	0	1.505	2.285	1.648
Chr1L	39678599	39679100	L_prox_lo_781	proximal_low_conf	0.776	1.449	2.15	1.716	1.537	2.023	2.67	0	3.941	0	2.107	3.998	4.614
Chr1L	39679837	39680338	L_prox_noab_782	proximal_noab_high	0.333	0.207	1.29	0.343	0.512	0.578	0.191	0	1.97	0	0.301	2.285	1.648
Chr1L	40045031	40045532	L_prox_hi_783	proximal_high_conf	0.554	3.518	2.007	2.059	1.409	1.59	2.289	12.158	0	0	6.32	5.712	5.602
Chr1L	40046275	40046776	L_dist_lo_784	distal_low_conf	0.333	2.483	1.864	0.686	0.768	0.434	0.381	4.053	0	0	2.107	1.999	0.33
Chr1L	40055578	40056079	L_dist_hi_785	distal_high_conf	0.222	0.621	2.58	1.03	1.409	1.879	3.242	0	3.941	0	3.01	2.57	3.295
Chr1L	40327511	40328012	L_dist_lo_786	distal_low_conf	0.111	0.414	0.287	0.686	0.384	0.145	0.954	4.053	3.941	0	1.806	3.141	1.318
Chr1L	40360926	40361427	L_prox_hi_787	proximal_high_conf	0.222	1.449	4.157	1.03	0.384	1.445	1.716	4.053	1.97	0	4.514	5.141	7.579
Chr1L	40406916	40407417	L_prox_hi_788	proximal_high_conf	0.333	2.69	1.147	2.403	1.025	0.145	0.763	0	1.97	0	1.806	3.427	5.932
Chr1L	40515466	40515967	L_dist_hi_789	distal_high_conf	0.665	1.449	2.007	1.716	0.64	1.445	1.716	0	0	0	2.107	3.427	3.625
Chr1L	40525451	40525952	L_prox_hi_790	proximal_high_conf	0.444	3.518	3.154	4.805	1.025	1.445	3.051	8.106	3.941	0	5.116	5.712	6.261
Chr1L	40525819	40526320	L_prox_hi_791	proximal_high_conf	0.222	2.69	2.724	2.403	1.281	2.457	3.242	4.053	3.941	8.334	3.612	2.57	4.284
Chr1L	40526211	40526712	L_prox_lo_792	proximal_low_conf	0.111	1.863	2.437	3.776	1.153	2.457	1.526	0	3.941	0	3.01	1.714	0.989
Chr1L	40647157	40647658	L_dist_hi_793	distal_high_conf	0.333	1.863	3.297	1.03	0.64	1.734	3.051	0	0	0	1.204	3.427	1.318
Chr1L	40723449	40723950	L_dist_hi_794	distal_high_conf	0.665	1.863	4.157	1.03	1.537	3.179	2.861	0	0	0	2.107	3.713	1.648
Chr1L	40724478	40724979	L_prox_lo_795	proximal_low_conf	0.444	1.863	5.017	0.686	0.512	2.746	3.433	0	0	0	3.311	2.57	0.989
Chr1L	40727284	40727785	L_dist_hi_796	distal_high_conf	0.333	3.932	4.444	1.716	0.897	4.046	6.484	4.053	0	0	5.718	5.426	5.602
Chr1L	40765660	40766161	L_dist_noab_797	distal_noab_high	0.776	0.207	1.433	0.686	0.512	0.578	2.289	0	1.97	0	0	3.713	1.977
Chr1L	40803595	40804096	L_prox_hi_798	proximal_high_conf	0.665	1.656	3.584	1.03	1.537	1.879	2.479	4.053	3.941	0	3.01	2.856	3.295
Chr1L	40804249	40804750	L_prox_lo_799	proximal_low_conf	0.887	2.69	4.587	1.716	1.281	1.012	2.67	4.053	1.97	0	7.825	9.424	8.898
Chr1L	40816837	40817338	L_prox_hi_800	proximal_high_conf	0.222	2.069	2.724	2.403	1.409	2.746	2.289	4.053	7.882	0	3.01	4.284	3.295
Chr1L	40871293	40871794	L_prox_noab_801	proximal_noab_high	0.887	1.035	0.86	0.343	1.025	0.434	1.144	0	3.941	0	3.612	5.712	4.614
Chr1L	41010563	41011064	L_dist_lo_802	distal_low_conf	0.444	1.863	0.86	1.03	1.537	1.012	1.526	0	1.97	0	0.903	1.714	1.318
Chr1L	41012531	41013032	L_dist_noab_803	distal_noab_high	0.444	0.621	0.43	0.686	1.025	0.578	0.191	8.106	0	0	1.204	0.857	1.977
Chr1L	41104445	41104946	L_dist_lo_804	distal_low_conf	0.776	4.139	4.014	1.03	0.64	5.925	6.294	4.053	3.941	0	4.213	3.141	2.636
Chr1L	41112077	41112578	L_prox_hi_805	proximal_high_conf	0.444	2.69	4.587	0.686	1.281	2.168	4.196	8.106	5.911	8.334	7.524	10.281	6.92
Chr1L	41113150	41113651	L_prox_noab_806	proximal_noab_high	1.109	1.863	3.297	2.059	1.025	1.445	4.005	0	0	0	2.107	4.569	1.648
Chr1L	41115322	41115823	L_dist_noab_807	distal_noab_high	0.444	0.621	1.147	0.343	1.409	0.434	2.289	0	0	0	1.806	2.57	1.318
Chr1L	41117907	41118408	L_dist_noab_808	distal_noab_high	0.444	1.035	1.433	0.343	0.64	1.445	2.098	4.053	0	0	3.01	2.57	1.977
Chr1L	41242650	41243151	L_dist_lo_809	distal_low_conf	0.333	0.414	1.003	1.373	0.512	1.445	3.433	0	0	0	1.505	1.142	1.318
Chr1L	41341547	41342048	L_prox_hi_810	proximal_high_conf	0.444	3.518	2.15	1.373	1.409	1.012	0.572	4.053	1.97	0	1.505	1.999	1.318
Chr1L	41365257	41365758	L_prox_hi_811	proximal_high_conf	0.111	1.035	1.147	1.03	1.409	1.445	1.144	4.053	1.97	0	1.806	2.57	1.977
Chr1L	41365802	41366303	L_prox_noab_812	proximal_noab_high	0.776	0.621	2.15	0.686	1.153	1.734	3.051	0	3.941	0	2.408	4.284	0.659
Chr1L	41420264	41420765	L_dist_noab_813	distal_noab_high	0.554	0.621	0.287	1.03	0.64	0	0.191	0	0	0	2.408	0.571	0.989
Chr1L	41539794	41540295	L_prox_lo_814	proximal_low_conf	0.333	1.656	1.433	1.716	0.897	0.723	0.954	0	3.941	0	1.505	3.427	0.989
Chr1L	41576662	41577163	L_dist_lo_815	distal_low_conf	0.776	2.69	3.154	1.373	0.64	1.445	2.289	0	0	0	1.505	1.999	3.625
Chr1L	41680551	41681052	L_prox_hi_816	proximal_high_conf	0.444	0.414	1.72	1.373	1.025	1.879	1.907	0	0	0	2.107	1.714	1.648
Chr1L	41688047	41688548	L_dist_noab_817	distal_noab_high	0.554	0.207	0.287	0.686	1.025	0.289	0.763	0	0	8.334	1.505	1.714	1.318
Chr1L	41706055	41706556	L_dist_noab_818	distal_noab_high	1.109	1.863	1.29	1.373	1.153	1.301	0.954	0	0	0	2.107	1.714	0.989
Chr1L	41706690	41707191	L_dist_lo_819	distal_low_conf	0.222	1.035	2.007	1.03	1.409	1.156	1.335	8.106	1.97	0	3.311	1.999	0.989
Chr1L	41706914	41707415	L_dist_lo_820	distal_low_conf	0.222	0.621	1.577	0.686	1.409	1.156	1.335	4.053	1.97	0	2.408	2.57	0.989
Chr1L	41747054	41747555	L_dist_hi_821	distal_high_conf	0.333	1.656	1.577	0.686	1.281	3.179	3.051	0	0	0	2.107	3.141	2.636
Chr1L	41754989	41755490	L_dist_noab_822	distal_noab_high	0.444	0.414	1.29	0	0.384	0.723	1.907	0	0	0	0.602	1.999	0.33
Chr1L	41755637	41756138	L_prox_noab_823	proximal_noab_high	0.554	1.035	0.717	0.686	0.128	1.156	1.335	0	3.941	0	2.709	0.857	1.318
Chr1L	41757794	41758295	L_dist_hi_824	distal_high_conf	0.444	1.863	4.587	1.716	1.921	2.023	3.051	0	0	0	2.408	2.285	1.318
Chr1L	41758389	41758890	L_dist_lo_825	distal_low_conf	0.665	3.311	3.01	0	0.64	2.601	3.624	4.053	1.97	8.334	3.01	1.142	0.659
Chr1L	41844944	41845445	L_dist_lo_826	distal_low_conf	0.887	3.725	1.577	1.373	1.025	2.457	1.907	0	1.97	0	2.107	1.999	2.307
Chr1L	41869761	41870262	L_dist_lo_827	distal_low_conf	0.333	1.035	0.717	0.686	0.64	0.723	0.954	0	1.97	0	1.204	0.286	1.318
Chr1L	41914099	41914600	L_dist_hi_828	distal_high_conf	0.444	1.863	2.007	1.373	0.64	2.746	2.289	0	0	0	1.204	1.428	2.307
Chr1L	41925986	41926487	L_prox_hi_829	proximal_high_conf	0.111	1.242	2.867	2.746	0.64	2.312	3.051	8.106	11.823	0	5.718	7.997	5.273
Chr1L	41952540	41953041	L_dist_noab_830	distal_noab_high	0.887	1.863	2.15	1.03	0.512	1.156	2.289	0	1.97	0	3.912	4.855	1.977
Chr1L	42073678	42074179	L_prox_hi_831	proximal_high_conf	0.776	2.897	2.724	2.059	1.281	1.012	1.335	0	1.97	0	2.107	2.856	3.625
Chr1L	42131457	42131958	L_prox_noab_832	proximal_noab_high	0.665	1.449	1.577	1.03	0.897	1.445	1.907	0	1.97	8.334	5.417	4.569	6.261
Chr1L	42134379	42134880	L_dist_hi_833	distal_high_conf	0.444	3.104	3.01	2.746	1.793	1.59	2.861	0	0	0	1.505	2.57	1.977
Chr1L	42143505	42144006	L_prox_hi_834	proximal_high_conf	0.222	1.449	1.864	0.686	1.537	0.723	1.144	8.106	1.97	0	4.514	1.999	5.273
Chr1L	42143728	42144229	L_prox_hi_835	proximal_high_conf	0.222	1.449	1.72	1.373	1.281	1.012	1.526	8.106	1.97	0	4.815	2.57	5.273
Chr1L	42147079	42147580	L_dist_noab_836	distal_noab_high	0.333	0.207	0.573	1.373	0.512	1.301	1.907	0	0	0	1.806	1.428	1.977
Chr1L	42147860	42148361	L_dist_lo_837	distal_low_conf	0.333	0.414	0.86	1.716	1.025	1.301	1.144	0	0	0	1.505	1.142	1.318
Chr1L	42150650	42151151	L_dist_noab_838	distal_noab_high	0.776	0.828	1.433	1.03	1.025	1.301	1.526	0	0	0	2.107	5.141	1.648
Chr1L	42222611	42223112	L_prox_lo_839	proximal_low_conf	0.665	1.242	2.007	1.03	1.921	2.89	2.098	0	0	0	2.408	3.141	3.295
Chr1L	42372520	42373021	L_dist_lo_840	distal_low_conf	0.333	1.449	0.86	1.03	0.512	1.156	1.335	4.053	1.97	0	3.01	2.285	2.307
Chr1L	42430864	42431365	L_prox_noab_841	proximal_noab_high	1.331	2.69	2.58	0.686	1.793	1.734	4.005	4.053	3.941	0	5.417	3.998	2.966
Chr1L	42612714	42613215	L_prox_hi_842	proximal_high_conf	0.333	2.276	3.87	3.776	0.512	1.59	2.67	0	13.793	16.667	8.126	9.424	13.841
Chr1L	42627090	42627591	L_dist_noab_843	distal_noab_high	0.665	0.621	1.003	1.373	0.384	0.289	0.954	0	0	0	1.505	1.142	1.318
Chr1L	42635367	42635868	L_dist_noab_844	distal_noab_high	0.554	0.828	0.287	0.343	0.256	0.289	0.763	0	0	0	1.806	1.428	0.989
Chr1L	42666667	42667168	L_prox_hi_845	proximal_high_conf	0.554	5.588	2.724	2.746	1.537	2.457	2.861	0	0	0	9.029	9.424	8.568
Chr1L	42687117	42687618	L_dist_lo_846	distal_low_conf	0.222	1.035	1.003	0.343	1.153	1.012	2.479	0	3.941	0	2.408	2.856	0.989
Chr1L	42694852	42695353	L_dist_noab_847	distal_noab_high	0.554	0.621	0.717	1.373	0.768	0.723	2.289	0	0	0	2.709	1.142	0.659
Chr1L	42698521	42699022	L_prox_hi_848	proximal_high_conf	0.554	2.069	2.294	2.746	1.537	2.023	2.67	0	1.97	0	2.709	4.855	2.966
Chr1L	42698874	42699375	L_prox_hi_849	proximal_high_conf	0.554	2.069	3.01	2.403	0.512	1.301	2.479	0	3.941	0	5.116	5.712	8.239
Chr1L	42721533	42722034	L_prox_hi_850	proximal_high_conf	0.554	1.863	2.437	1.373	0.768	2.023	3.624	8.106	7.882	0	4.815	6.283	7.25
Chr1L	42739334	42739835	L_dist_noab_851	distal_noab_high	0.222	0.207	0.573	0	1.025	0.723	0.191	0	0	0	1.204	0.571	1.318
Chr1L	42754877	42755378	L_prox_hi_852	proximal_high_conf	0.111	1.242	1.433	1.373	1.537	1.012	1.716	0	0	8.334	3.612	1.999	1.648
Chr1L	42856989	42857490	L_dist_noab_853	distal_noab_high	0.887	2.69	1.433	0.686	1.025	2.168	4.386	4.053	0	8.334	4.213	4.569	2.307
Chr1L	42858258	42858759	L_dist_noab_854	distal_noab_high	0.444	1.242	0.573	0.686	0.512	1.445	4.386	0	0	0	1.806	2.57	1.977
Chr1L	42863509	42864010	L_dist_lo_855	distal_low_conf	0.554	3.518	2.007	0	0.897	3.902	5.912	0	1.97	16.667	3.612	2.856	3.625
Chr1L	42864017	42864518	L_dist_lo_856	distal_low_conf	0.554	1.656	1.147	1.03	0.897	3.902	3.624	0	0	0	3.912	1.428	0.989
Chr1L	42866061	42866562	L_dist_lo_857	distal_low_conf	0.333	1.449	1.003	0.686	0.256	2.312	1.526	0	0	0	2.709	2.57	1.318
Chr1L	42868524	42869025	L_dist_lo_858	distal_low_conf	0.111	0.207	0.287	0.686	0.897	1.156	2.098	0	0	0	2.107	0.571	1.648
Chr1L	42871502	42872003	L_dist_hi_859	distal_high_conf	0.222	1.242	1.577	2.059	0.256	2.023	4.196	0	0	0	4.213	4.855	1.977
Chr1L	42871977	42872478	L_prox_hi_860	proximal_high_conf	0.222	1.242	2.724	3.089	0.897	3.179	6.294	0	3.941	0	3.912	5.426	1.977
Chr1L	42872692	42873193	L_prox_hi_861	proximal_high_conf	0.444	3.311	2.15	1.373	1.409	5.636	6.484	12.158	5.911	8.334	8.126	8.568	5.602
Chr1L	42875305	42875806	L_dist_hi_862	distal_high_conf	0.444	1.863	2.437	2.403	0.64	1.879	3.433	0	5.911	0	1.806	3.141	3.295
Chr1L	42876731	42877232	L_dist_noab_863	distal_noab_high	1.442	2.069	2.867	0.686	1.153	6.503	7.819	0	0	0	4.213	5.712	2.966
Chr1L	42940373	42940874	L_dist_lo_864	distal_low_conf	0.444	1.035	1.147	0.686	1.153	1.012	0.381	0	0	0	3.912	0.571	1.977
Chr1L	43067463	43067964	L_dist_lo_865	distal_low_conf	0.554	0.828	1.577	0.343	2.049	0.434	1.716	0	0	0	2.107	1.142	2.307
Chr1L	43218241	43218742	L_dist_lo_866	distal_low_conf	0.222	0.621	0.43	0.686	0.512	0.289	0.763	0	0	0	1.204	0.286	1.648
Chr1L	43382923	43383424	L_dist_noab_867	distal_noab_high	0.554	0.828	1.29	0.343	0.897	0.723	0	0	1.97	0	2.408	0.571	1.977
Chr1L	43847330	43847831	L_dist_hi_868	distal_high_conf	0.554	2.276	3.297	2.059	0.64	3.613	6.103	0	0	0	2.107	2.57	2.307
Chr1L	44004439	44004940	L_dist_hi_869	distal_high_conf	0.554	5.174	5.877	2.746	1.409	2.168	3.433	8.106	0	0	1.505	4.855	3.625
Chr1L	44005048	44005549	L_prox_lo_870	proximal_low_conf	0.333	4.553	6.307	0.686	1.793	3.757	3.242	0	5.911	0	3.612	4.284	0.989
Chr1L	44005462	44005963	L_prox_hi_871	proximal_high_conf	0.222	4.346	6.164	1.373	2.049	2.89	2.861	4.053	3.941	8.334	6.621	13.137	6.92
Chr1L	44020331	44020832	L_prox_lo_872	proximal_low_conf	0.776	1.242	2.437	3.776	0.512	1.301	1.335	4.053	1.97	8.334	5.116	1.999	2.966
Chr1L	44156751	44157252	L_prox_hi_873	proximal_high_conf	0.776	2.897	1.864	2.403	0.64	0.434	1.716	4.053	1.97	0	2.709	3.141	3.954
Chr1L	44266589	44267090	L_prox_hi_874	proximal_high_conf	0.333	2.069	2.15	1.716	1.281	1.445	1.716	4.053	5.911	0	3.311	3.713	3.625
Chr1L	44307438	44307939	L_dist_noab_875	distal_noab_high	0.776	1.863	0.717	0.343	0.256	2.023	1.526	0	0	0	2.107	3.141	2.636
Chr1L	44324170	44324671	L_prox_hi_876	proximal_high_conf	0.333	1.863	1.29	1.716	1.281	1.445	0.763	0	0	8.334	3.311	2.856	2.636
Chr1L	44484809	44485310	L_dist_lo_877	distal_low_conf	0.444	1.242	1.147	0.686	0.768	2.89	5.34	0	0	8.334	1.204	2.57	1.977
Chr1L	44486808	44487309	L_dist_noab_878	distal_noab_high	0.665	1.035	0.717	0.686	1.281	1.445	4.005	0	0	0	3.311	3.427	2.636
Chr1L	44487351	44487852	L_dist_noab_879	distal_noab_high	1.22	1.242	1.147	1.373	0.897	1.734	4.768	0	1.97	0	3.311	5.426	3.954
Chr1L	44489317	44489818	L_dist_noab_880	distal_noab_high	0.665	1.242	1.577	0.343	0.897	1.301	3.051	4.053	0	0	1.204	2.856	1.648
Chr1L	44586049	44586550	L_dist_lo_881	distal_low_conf	0.998	1.656	2.724	2.746	1.537	2.457	1.716	8.106	0	0	5.116	3.713	5.602
Chr1L	44635777	44636278	L_prox_hi_882	proximal_high_conf	0.665	2.483	1.864	3.432	1.921	1.59	1.907	4.053	0	0	3.311	4.569	3.625
Chr1L	44636114	44636615	L_prox_hi_883	proximal_high_conf	0.665	2.069	2.294	1.716	1.793	1.734	2.098	4.053	0	0	4.213	2.285	2.636
Chr1L	44639969	44640470	L_prox_hi_884	proximal_high_conf	0.222	2.069	1.72	2.059	1.921	1.734	3.051	4.053	5.911	0	1.204	7.14	2.966
Chr1L	44711475	44711976	L_dist_lo_885	distal_low_conf	0.554	1.242	2.007	1.373	1.025	0.723	1.335	4.053	0	0	2.107	0.286	0.989
Chr1L	44720286	44720787	L_dist_noab_886	distal_noab_high	0.665	0.414	0.43	1.03	0.897	0.434	0.381	0	0	0	1.806	0.571	1.648
Chr1L	44722495	44722996	L_prox_hi_887	proximal_high_conf	0.444	2.069	1.72	1.716	1.409	1.301	0.381	8.106	3.941	0	4.213	3.427	1.648
Chr1L	44732715	44733216	L_prox_hi_888	proximal_high_conf	0.554	2.897	2.007	3.432	1.665	3.035	3.051	0	1.97	8.334	1.806	1.714	3.954
Chr1L	45005590	45006091	L_dist_lo_889	distal_low_conf	0.444	1.863	3.154	0.343	0.512	0.867	1.335	0	1.97	0	1.505	3.141	1.318
Chr1L	45021486	45021987	L_dist_lo_890	distal_low_conf	0.111	1.449	2.437	2.746	0.897	0.578	0.572	0	0	0	1.204	3.141	0.989
Chr1L	45399637	45400138	L_dist_lo_891	distal_low_conf	0.111	1.035	0.86	1.03	0.897	0.434	0.763	8.106	0	0	2.107	1.714	0.989
Chr1L	45633725	45634226	L_dist_lo_892	distal_low_conf	0.554	1.242	2.15	1.716	0.384	1.012	1.335	0	0	0	1.204	1.142	2.307
Chr1L	45678864	45679365	L_prox_hi_893	proximal_high_conf	0.333	1.656	1.72	2.403	0.768	1.59	2.67	0	0	0	2.709	3.713	3.625
Chr1L	45679100	45679601	L_prox_hi_894	proximal_high_conf	0.111	1.656	1.577	2.746	0.897	1.012	2.479	0	1.97	0	1.806	3.427	3.625
Chr1L	45703663	45704164	L_dist_lo_895	distal_low_conf	0.222	0.414	0.43	0.686	0.897	1.445	1.144	0	3.941	0	2.107	1.142	0.33
Chr1L	45704983	45705484	L_prox_hi_896	proximal_high_conf	0.333	1.449	2.007	1.373	1.409	1.445	2.289	0	1.97	0	5.116	5.997	5.602
Chr1L	45705558	45706059	L_prox_lo_897	proximal_low_conf	0.222	2.483	1.577	1.716	1.921	1.879	4.768	0	1.97	0	1.505	2.856	0.989
Chr1L	45743093	45743594	L_dist_hi_898	distal_high_conf	0.887	4.139	2.437	2.403	1.025	3.179	1.907	0	1.97	8.334	3.912	3.427	1.977
Chr1L	45833763	45834264	L_prox_hi_899	proximal_high_conf	0.222	1.863	1.577	2.059	1.409	1.156	1.144	0	1.97	0	2.709	1.999	1.977
Chr1L	45873867	45874368	L_dist_hi_900	distal_high_conf	0.444	1.449	2.007	1.716	1.153	0.289	0.763	0	3.941	8.334	1.806	3.141	1.648
Chr1L	46187453	46187954	L_prox_lo_901	proximal_low_conf	0.665	2.897	2.58	3.776	1.537	2.023	2.479	0	3.941	0	2.709	1.999	1.318
Chr1L	46187672	46188173	L_prox_hi_902	proximal_high_conf	0.444	3.104	2.437	3.776	1.153	2.601	2.479	0	3.941	0	4.815	3.998	2.966
Chr1L	46221694	46222195	L_prox_hi_903	proximal_high_conf	0.111	2.897	2.867	1.716	1.153	1.879	1.526	20.264	1.97	0	4.815	3.998	1.977
Chr1L	46271661	46272162	L_dist_noab_904	distal_noab_high	0.444	0.828	0.717	0	0.128	0.434	0.763	4.053	0	8.334	0.602	2.285	1.318
Chr1L	46634228	46634729	L_prox_lo_905	proximal_low_conf	0.444	1.035	1.72	1.373	2.177	0.289	1.335	0	0	0	0.903	1.999	0.989
Chr1L	46635066	46635567	L_prox_lo_906	proximal_low_conf	0.333	1.656	2.15	1.716	0.897	0.867	2.098	4.053	0	0	3.01	3.427	0.989
Chr1L	46655578	46656079	L_prox_hi_907	proximal_high_conf	0	2.069	2.15	3.089	1.281	1.734	0.763	12.158	1.97	8.334	7.223	5.712	8.898
Chr1L	46679967	46680468	L_dist_noab_908	distal_noab_high	0.554	1.242	0.573	0.343	0.768	1.301	2.479	0	1.97	0	0.903	1.999	0.659
Chr1L	46792397	46792898	L_prox_hi_909	proximal_high_conf	0.554	1.656	1.72	2.059	1.281	1.156	0.763	4.053	0	0	2.709	3.713	1.648
Chr1L	46792860	46793361	L_prox_hi_910	proximal_high_conf	0.333	1.449	2.724	2.059	1.281	1.301	0.763	8.106	3.941	8.334	3.01	1.999	4.284
Chr1L	46806790	46807291	L_prox_hi_911	proximal_high_conf	0.333	1.035	1.29	2.746	1.153	0.434	1.526	4.053	0	0	1.505	1.428	2.307
Chr1L	46852090	46852591	L_prox_hi_912	proximal_high_conf	0.665	2.276	2.437	2.746	1.281	1.734	2.861	4.053	0	0	1.806	1.428	1.977
Chr1L	46947932	46948433	L_dist_hi_913	distal_high_conf	0.554	2.483	2.15	2.059	1.025	2.457	1.716	4.053	1.97	0	3.612	2.285	2.307
Chr1L	46974708	46975209	L_prox_hi_914	proximal_high_conf	0.444	2.276	5.591	3.776	1.025	2.746	3.814	0	5.911	0	6.32	7.997	11.534
Chr1L	46975695	46976196	L_prox_lo_915	proximal_low_conf	0.554	1.656	0.86	2.059	2.049	2.023	1.526	8.106	1.97	0	2.408	2.57	0.659
Chr1L	47000762	47001263	L_dist_lo_916	distal_low_conf	0.554	1.656	1.72	1.03	1.281	2.457	2.861	0	0	0	1.204	1.428	0.659
Chr1L	47001864	47002365	L_dist_noab_917	distal_noab_high	1.109	0.828	2.294	1.373	0.64	2.457	4.005	0	1.97	0	2.107	1.999	3.295
Chr1L	47012700	47013201	L_dist_lo_918	distal_low_conf	0.222	0.828	0.717	0.343	0.768	0.723	0.381	0	0	0	2.408	1.428	0.989
Chr1L	47026696	47027197	L_dist_lo_919	distal_low_conf	0.333	1.863	0.287	0.686	0.64	0.289	1.335	0	0	0	0.903	2.285	0.989
Chr1L	47028421	47028922	L_prox_lo_920	proximal_low_conf	0.333	1.242	1.003	1.03	0.768	1.156	1.335	0	1.97	0	1.806	2.57	0.989
Chr1L	47080009	47080510	L_prox_noab_921	proximal_noab_high	0.444	0.621	0.287	0.686	0.384	0.434	0.191	0	3.941	0	2.107	0.571	1.977
Chr1L	47213422	47213923	L_prox_hi_922	proximal_high_conf	0.554	2.897	4.3	1.716	1.409	2.168	1.907	4.053	1.97	0	7.223	6.283	6.92
Chr1L	47215761	47216262	L_dist_noab_923	distal_noab_high	0.665	0.414	0.573	0.686	1.409	1.012	0.954	0	3.941	8.334	2.107	2.285	0.659
Chr1L	47245728	47246229	L_dist_noab_924	distal_noab_high	0.998	0.828	0.573	0.686	0.512	1.012	0.763	0	3.941	0	1.204	3.141	0.989
Chr1L	47246596	47247097	L_dist_noab_925	distal_noab_high	0.554	1.449	0.717	1.373	0.384	1.59	1.716	0	3.941	0	2.107	1.428	1.318
Chr1L	47250863	47251364	L_dist_noab_926	distal_noab_high	0.444	0.414	0.86	0.686	1.153	0.578	0.572	4.053	1.97	0	1.505	1.142	2.307
Chr1L	47252107	47252608	L_prox_hi_927	proximal_high_conf	0.222	2.276	2.437	1.716	1.921	1.156	4.005	0	3.941	0	1.204	3.998	1.648
Chr1L	47252650	47253151	L_prox_hi_928	proximal_high_conf	0.554	3.725	4.014	1.373	1.153	2.601	4.005	4.053	7.882	0	3.01	3.998	1.318
Chr1L	47252955	47253456	L_prox_hi_929	proximal_high_conf	0.776	4.967	5.017	1.716	1.409	2.023	2.67	0	1.97	0	4.213	3.427	1.977
Chr1L	47253248	47253749	L_prox_hi_930	proximal_high_conf	0.998	3.932	4.157	2.059	1.793	2.168	2.67	0	1.97	0	4.815	2.57	3.295
Chr1L	47253815	47254316	L_prox_lo_931	proximal_low_conf	0.333	1.449	1.29	1.03	0.512	0.578	1.335	4.053	0	0	2.408	1.428	0.989
Chr1L	47297680	47298181	L_prox_noab_932	proximal_noab_high	0.444	0.621	0.287	0	0.768	1.301	0	4.053	1.97	0	1.806	1.999	1.318
Chr1L	47366865	47367366	L_dist_lo_933	distal_low_conf	0.333	1.242	0.573	1.373	0.897	1.734	2.861	0	0	0	1.204	0.857	1.318
Chr1L	47401710	47402211	L_dist_lo_934	distal_low_conf	0.665	2.69	2.724	2.059	1.409	2.601	3.433	0	0	0	3.612	6.283	1.318
Chr1L	47408441	47408942	L_dist_hi_935	distal_high_conf	0.776	3.725	4.014	2.746	1.665	3.757	4.768	0	1.97	0	4.514	4.569	4.284
Chr1L	47408976	47409477	L_dist_hi_936	distal_high_conf	0.776	4.553	5.447	3.776	2.177	4.335	6.675	0	9.852	0	5.417	5.426	2.966
Chr1L	47409639	47410140	L_dist_hi_937	distal_high_conf	0.333	3.518	5.304	1.716	1.793	4.191	5.531	12.158	7.882	0	4.213	3.427	3.295
Chr1L	47463229	47463730	L_dist_hi_938	distal_high_conf	0.444	1.656	1.433	2.746	1.793	1.156	2.098	8.106	1.97	0	5.718	3.427	2.636
Chr1L	47481616	47482117	L_dist_noab_939	distal_noab_high	0.887	0.828	1.003	0.343	0.128	1.445	0.954	0	0	0	1.505	3.427	0.989
Chr1L	47617901	47618402	L_prox_hi_940	proximal_high_conf	0.554	3.518	5.734	3.432	1.537	2.601	4.196	0	0	8.334	7.223	7.997	7.909
Chr1L	47618847	47619348	L_prox_hi_941	proximal_high_conf	0.444	3.518	5.734	1.03	0.64	1.879	2.861	4.053	0	8.334	5.417	7.14	6.591
Chr1L	47629742	47630243	L_dist_hi_942	distal_high_conf	0.998	4.346	4.444	2.746	3.074	3.468	4.768	4.053	1.97	0	5.417	6.854	5.602
Chr1L	47630103	47630604	L_dist_hi_943	distal_high_conf	0.333	4.967	5.877	2.403	2.305	2.457	5.721	4.053	1.97	0	3.01	5.712	4.943
Chr1L	47640943	47641444	L_dist_noab_944	distal_noab_high	0.776	2.483	1.577	1.373	0.64	2.457	4.386	0	0	0	5.116	6.283	2.966
Chr1L	47644060	47644561	L_prox_lo_945	proximal_low_conf	0.776	4.139	2.58	2.059	0.897	3.324	7.056	0	0	0	2.408	3.998	0.989
Chr1L	47644711	47645212	L_prox_hi_946	proximal_high_conf	0	4.967	5.304	2.746	1.665	4.913	6.294	0	3.941	0	2.408	3.427	2.636
Chr1L	47645124	47645625	L_prox_hi_947	proximal_high_conf	0.665	4.553	6.164	4.119	2.049	4.191	4.768	0	1.97	0	3.01	4.855	3.954
Chr1L	47836440	47836941	L_prox_hi_948	proximal_high_conf	0.665	2.276	2.437	1.716	1.537	2.746	2.479	0	0	0	4.213	4.284	3.295
Chr1L	47836829	47837330	L_prox_hi_949	proximal_high_conf	0.222	4.76	2.724	1.373	1.665	2.89	4.386	0	1.97	0	4.514	5.141	2.636
Chr1L	47837129	47837630	L_prox_hi_950	proximal_high_conf	0.222	3.725	2.007	2.059	1.921	1.59	3.814	0	1.97	8.334	6.922	6.283	3.295
Chr1L	47904969	47905470	L_prox_hi_951	proximal_high_conf	0.776	2.483	3.154	2.059	1.153	1.156	4.196	0	0	0	2.709	3.998	2.966
Chr1L	47926386	47926887	L_dist_lo_952	distal_low_conf	0.333	1.035	0.717	0.686	0.897	1.156	1.526	0	0	0	1.806	2.285	1.977
Chr1L	47929392	47929893	L_dist_lo_953	distal_low_conf	0.444	3.104	2.007	2.059	1.153	1.734	2.289	0	3.941	0	2.408	1.999	0.989
Chr1L	48081022	48081523	L_dist_lo_954	distal_low_conf	0.333	1.656	1.29	0	0.512	1.012	1.335	4.053	0	8.334	0.903	0.857	1.648
Chr1L	48104931	48105432	L_dist_lo_955	distal_low_conf	0.111	0.621	0.43	0.343	0.512	0.434	0	0	0	0	1.204	1.428	0.989
Chr1L	48114897	48115398	L_dist_hi_956	distal_high_conf	0.444	1.242	1.577	2.403	0.64	1.734	3.051	4.053	1.97	0	3.311	1.428	1.648
Chr1L	48256967	48257468	L_dist_lo_957	distal_low_conf	0.665	2.69	3.297	1.373	0.897	1.734	0.954	0	0	0	1.204	2.285	1.648
Chr1L	48306459	48306960	L_dist_lo_958	distal_low_conf	0.333	1.449	0.287	1.373	1.025	0.867	0.381	0	0	0	1.505	1.999	0.989
Chr1L	48419627	48420128	L_dist_noab_959	distal_noab_high	0.222	0.414	0.43	0.343	0.768	1.012	1.335	0	1.97	8.334	1.505	0.571	1.977
Chr1L	48420705	48421206	L_prox_hi_960	proximal_high_conf	0.222	3.311	3.297	2.403	1.281	2.312	5.721	8.106	11.823	0	6.32	6.569	5.273
Chr1L	48669022	48669523	L_dist_lo_961	distal_low_conf	0.444	0.621	1.29	2.059	0.768	1.156	3.051	12.158	0	8.334	0.903	1.428	2.636
Chr1L	48828148	48828649	L_prox_hi_962	proximal_high_conf	0.554	3.311	1.72	1.373	1.025	1.59	1.335	4.053	3.941	8.334	2.709	2.285	1.977
Chr1L	48828603	48829104	L_prox_lo_963	proximal_low_conf	0.554	3.518	2.294	1.03	0.897	1.445	2.479	4.053	7.882	25.001	3.01	4.284	4.614
Chr1L	49108219	49108720	L_dist_noab_964	distal_noab_high	0.554	0.414	1.147	0.343	1.153	1.301	1.144	0	0	0	1.505	0.571	1.318
Chr1L	49292893	49293394	L_dist_noab_965	distal_noab_high	0.444	0.621	0.143	0	0.64	0.578	0.191	0	1.97	0	1.806	3.427	0.659
Chr1L	49324032	49324533	L_dist_lo_966	distal_low_conf	0.554	1.449	0.717	2.059	0.64	1.156	1.144	0	1.97	0	1.505	1.428	1.648
Chr1L	49332439	49332940	L_dist_hi_967	distal_high_conf	0.665	5.588	4.157	3.432	1.281	3.468	5.912	4.053	0	0	7.223	9.424	4.284
Chr1L	49427193	49427694	L_dist_lo_968	distal_low_conf	0.665	2.276	3.44	1.373	0.64	2.312	3.433	0	1.97	8.334	1.505	2.57	2.966
Chr1L	49734129	49734630	L_dist_lo_969	distal_low_conf	0.222	0.414	0.287	1.03	0.897	0.578	0.763	4.053	1.97	0	3.01	1.428	1.648
Chr1L	49750539	49751040	L_dist_noab_970	distal_noab_high	0.665	1.035	0.573	0	0.64	0.723	0.572	0	1.97	0	1.806	1.714	1.648
Chr1L	49772029	49772530	L_dist_noab_971	distal_noab_high	0.665	0.828	1.147	0.343	0.512	0.867	1.335	0	0	0	2.408	2.57	2.636
Chr1L	49926567	49927068	L_prox_hi_972	proximal_high_conf	0.111	1.449	1.577	0.343	1.153	1.156	0.763	0	1.97	0	2.408	1.142	4.943
Chr1L	49926893	49927394	L_prox_noab_973	proximal_noab_high	0.554	0.621	1.577	0.686	1.153	0.578	0.954	0	0	0	2.408	1.428	1.977
Chr1L	49971941	49972442	L_prox_hi_974	proximal_high_conf	0.554	3.104	3.87	3.776	1.921	1.59	2.67	0	3.941	8.334	6.621	3.998	6.591
Chr1L	49972286	49972787	L_prox_hi_975	proximal_high_conf	0.444	1.242	2.294	2.059	1.281	1.445	1.526	0	1.97	0	2.408	2.285	4.284
Chr1L	50167420	50167921	L_prox_lo_976	proximal_low_conf	0.222	0.828	2.294	0.686	0.64	0.578	0.572	0	0	0	0.903	2.57	1.318
Chr1L	50168267	50168768	L_prox_lo_977	proximal_low_conf	0.776	1.242	4.444	1.373	1.281	0.434	0.763	0	3.941	0	3.912	3.713	2.307
Chr1L	50233076	50233577	L_dist_lo_978	distal_low_conf	0.333	1.242	3.154	0	0.897	1.301	1.335	0	1.97	0	1.806	1.428	1.318
Chr1L	50384985	50385486	L_prox_hi_979	proximal_high_conf	0.776	4.346	3.297	2.403	1.025	2.457	2.67	8.106	5.911	0	3.01	2.57	2.636
Chr1L	50431086	50431587	L_prox_lo_980	proximal_low_conf	0.222	0.414	2.15	0.343	1.281	0.434	0.954	0	0	0	0.301	1.999	1.318
Chr1L	50509476	50509977	L_prox_lo_981	proximal_low_conf	0.333	0.828	1.29	0.686	1.281	0.289	1.144	4.053	0	16.667	1.505	1.428	1.977
Chr1L	50574335	50574836	L_prox_hi_982	proximal_high_conf	0.333	1.035	1.147	1.03	1.153	0.723	1.335	0	7.882	0	2.709	4.855	2.636
Chr1L	50899033	50899534	L_dist_noab_983	distal_noab_high	0.333	1.449	0.86	0	0.512	2.023	2.67	0	0	0	1.505	0.857	1.977
Chr1L	50915676	50916177	L_prox_hi_984	proximal_high_conf	0.554	4.346	7.311	2.059	0.897	5.492	9.917	0	0	8.334	3.912	7.14	4.284
Chr1L	50916845	50917346	L_prox_hi_985	proximal_high_conf	0.222	5.795	7.884	3.432	0.897	5.347	8.773	0	0	0	8.427	8.568	4.943
Chr1L	50917945	50918446	L_dist_lo_986	distal_low_conf	0.333	6.208	6.307	2.746	1.665	5.203	9.345	0	0	0	3.01	3.427	0.989
Chr1L	51054235	51054736	L_prox_hi_987	proximal_high_conf	0	2.69	3.584	2.059	1.665	1.301	2.289	4.053	0	0	1.806	2.285	1.648
Chr1L	51054757	51055258	L_prox_hi_988	proximal_high_conf	0	1.242	2.007	2.403	1.537	0.867	1.144	4.053	3.941	0	4.514	5.997	3.295
Chr1L	51124300	51124801	L_dist_hi_989	distal_high_conf	0.333	1.449	1.29	1.03	1.153	1.156	0.763	0	1.97	0	1.505	1.714	1.977
Chr1L	51312119	51312620	L_dist_noab_990	distal_noab_high	0.665	1.863	0.573	2.059	0.897	0.578	0.381	0	0	0	0.903	0.857	1.648
Chr1L	51408119	51408620	L_prox_hi_991	proximal_high_conf	0.333	1.242	3.87	0.343	1.537	1.156	1.335	0	3.941	0	3.912	5.426	5.602
Chr1L	51408421	51408922	L_prox_hi_992	proximal_high_conf	0.776	2.069	4.3	1.373	2.69	2.168	1.716	0	3.941	0	3.01	4.284	3.625
Chr1L	51409029	51409530	L_prox_hi_993	proximal_high_conf	0.998	2.069	2.867	2.403	2.049	1.012	2.289	8.106	7.882	8.334	3.912	4.569	3.295
Chr1L	51413451	51413952	L_dist_noab_994	distal_noab_high	0.776	0.621	1.577	0.686	1.665	1.301	0.381	0	0	8.334	2.107	0.857	0.989
Chr1L	51414729	51415230	L_dist_hi_995	distal_high_conf	0.333	2.69	3.87	0.686	2.305	0.434	1.716	4.053	1.97	0	2.408	2.856	2.966
Chr1L	51415452	51415953	L_dist_hi_996	distal_high_conf	0.444	1.863	1.864	1.716	2.818	1.59	1.716	0	1.97	0	2.709	5.997	2.307
Chr1L	51419026	51419527	L_dist_hi_997	distal_high_conf	0.333	1.242	1.147	1.03	1.153	0.867	0.572	0	7.882	0	1.505	3.427	1.648
Chr1L	51421271	51421772	L_dist_hi_998	distal_high_conf	0.554	2.069	1.864	0.686	1.537	1.012	0.954	8.106	0	8.334	2.709	4.855	2.307
Chr1L	51422716	51423217	L_dist_hi_999	distal_high_conf	0.333	1.863	1.433	3.089	1.153	0.434	0.572	0	1.97	0	2.107	3.427	1.318
Chr1L	51433841	51434342	L_dist_noab_1000	distal_noab_high	0.333	1.035	0.43	0	0.512	0.434	0.572	0	1.97	0	1.806	2.285	4.614
Chr1L	51529783	51530284	L_dist_hi_1001	distal_high_conf	0.776	4.553	4.874	1.716	1.665	2.89	3.433	0	1.97	0	4.514	3.427	5.273
Chr1L	51531229	51531730	L_prox_hi_1002	proximal_high_conf	0.444	2.276	4.731	2.746	1.281	3.179	4.386	0	1.97	0	5.116	6.283	5.932
Chr1L	51567238	51567739	L_dist_lo_1003	distal_low_conf	0.665	1.863	1.864	2.403	0.64	4.624	7.247	0	0	0	2.709	3.427	1.318
Chr1L	51568420	51568921	L_prox_hi_1004	proximal_high_conf	0.444	5.381	8.458	2.746	1.409	4.624	12.397	4.053	0	0	2.107	4.284	2.307
Chr1L	51569325	51569826	L_prox_hi_1005	proximal_high_conf	0.554	4.553	7.454	2.746	0.897	3.179	5.912	0	3.941	0	14.446	18.849	11.863
Chr1L	51569976	51570477	L_prox_hi_1006	proximal_high_conf	0.444	6.622	6.737	4.462	1.921	5.203	7.247	0	7.882	8.334	6.922	9.139	3.625
Chr1L	51571759	51572260	L_dist_noab_1007	distal_noab_high	0.665	1.449	1.433	1.373	0.128	1.301	0.954	0	0	0	1.204	1.999	0.989
Chr1L	51601095	51601596	L_dist_lo_1008	distal_low_conf	0.333	2.897	0.86	1.373	0.512	5.203	5.912	0	0	0	2.408	2.285	1.318
Chr1L	51601512	51602013	L_dist_noab_1009	distal_noab_high	0.887	3.104	1.147	0.686	0.512	3.902	5.531	0	0	0	4.514	1.999	0.989
Chr1L	51603915	51604416	L_dist_lo_1010	distal_low_conf	0.333	0.621	1.864	1.03	0.384	4.191	7.819	0	0	0	1.505	3.141	1.977
Chr1L	51607159	51607660	L_dist_noab_1011	distal_noab_high	0.444	1.242	0.86	0.343	0.768	1.445	2.289	0	0	0	2.107	1.142	1.648
Chr1L	51613403	51613904	L_dist_lo_1012	distal_low_conf	0.222	1.656	1.147	0.686	0.384	1.445	2.098	0	0	8.334	1.505	2.856	1.648
Chr1L	51613826	51614327	L_dist_lo_1013	distal_low_conf	0.333	0.414	1.577	1.03	0.384	1.59	2.861	0	0	0	0.903	2.57	1.648
Chr1L	51620656	51621157	L_dist_lo_1014	distal_low_conf	0.111	1.242	1.72	0.686	0.64	1.59	2.479	0	0	0	2.408	1.999	1.648
Chr1L	51623421	51623922	L_dist_lo_1015	distal_low_conf	0.333	2.069	3.297	0.343	0.897	5.203	6.294	0	0	0	4.815	4.284	1.648
Chr1L	51623735	51624236	L_dist_lo_1016	distal_low_conf	0.333	1.863	2.867	0.343	0.897	3.757	5.34	0	0	0	2.408	1.428	1.648
Chr1L	51626657	51627158	L_dist_hi_1017	distal_high_conf	0.333	1.656	2.437	1.373	0.897	4.335	5.531	0	3.941	0	1.806	1.999	1.318
Chr1L	51627180	51627681	L_dist_hi_1018	distal_high_conf	0.444	3.311	2.007	1.373	1.281	4.48	8.01	0	1.97	0	2.107	4.284	2.307
Chr1L	51633955	51634456	L_dist_hi_1019	distal_high_conf	0.554	5.381	5.017	2.059	0.512	3.324	8.773	12.158	0	8.334	3.912	5.141	3.295
Chr1L	51634203	51634704	L_dist_hi_1020	distal_high_conf	0.444	5.588	6.307	2.403	0.768	5.058	11.634	12.158	0	8.334	4.213	4.855	1.648
Chr1L	51634445	51634946	L_dist_hi_1021	distal_high_conf	0.222	5.174	6.594	3.089	0.768	6.359	12.015	12.158	0	0	2.709	2.856	1.318
Chr1L	51635501	51636002	L_dist_lo_1022	distal_low_conf	0.998	3.932	4.157	1.716	0.897	5.058	8.01	4.053	1.97	8.334	3.01	3.141	3.295
Chr1L	51669261	51669762	L_dist_lo_1023	distal_low_conf	0.444	1.863	1.577	0.343	0.64	5.058	6.675	0	0	0	2.107	3.427	3.295
Chr1L	51785252	51785753	L_dist_noab_1024	distal_noab_high	0.665	0.207	0.287	1.03	0.256	1.156	0.381	0	1.97	0	0.602	1.428	1.977
Chr1L	52574175	52574676	L_dist_noab_1025	distal_noab_high	0.554	0	0.717	0.343	0.512	1.012	0.763	0	1.97	0	0.602	1.142	1.977
Chr1L	52662502	52663003	L_dist_noab_1026	distal_noab_high	0.665	1.242	1.29	1.716	0.897	2.168	2.289	0	1.97	0	3.912	3.713	1.318
Chr1L	52713003	52713504	L_prox_hi_1027	proximal_high_conf	0.554	2.069	3.44	3.089	1.281	1.59	2.289	4.053	1.97	0	6.922	5.997	4.943
Chr1L	52774019	52774520	L_dist_lo_1028	distal_low_conf	0.333	0.828	0.717	0.343	1.153	1.012	0.381	0	0	0	0.602	1.999	3.295
Chr1L	52775719	52776220	L_prox_noab_1029	proximal_noab_high	1.22	3.932	3.297	1.373	0.64	2.457	4.005	4.053	0	0	3.612	4.284	1.648
Chr1L	52832491	52832992	L_dist_noab_1030	distal_noab_high	0.776	0.621	0.717	0.686	0.897	1.59	3.433	0	0	0	1.806	1.714	0.659
Chr1L	52846336	52846837	L_prox_hi_1031	proximal_high_conf	0.444	1.863	1.433	3.432	0.768	0.867	0.763	4.053	1.97	0	3.612	2.856	6.92
Chr1L	52851276	52851777	L_prox_lo_1032	proximal_low_conf	0.665	1.035	1.29	3.089	1.793	2.023	2.67	0	0	0	3.01	3.141	1.318
Chr1L	52852199	52852700	L_prox_hi_1033	proximal_high_conf	0.333	2.69	3.01	1.373	1.793	1.879	1.526	0	1.97	0	2.107	2.856	2.966
Chr1L	52931051	52931552	L_dist_lo_1034	distal_low_conf	0.333	0.828	1.72	1.03	0.897	0.867	3.433	4.053	0	0	1.505	2.57	1.977
Chr1L	52976463	52976964	L_prox_hi_1035	proximal_high_conf	0.111	1.242	2.007	2.059	0.512	1.301	2.479	0	1.97	8.334	2.709	2.856	2.636
Chr1L	53258657	53259158	L_prox_hi_1036	proximal_high_conf	0.333	0.414	1.433	2.059	1.281	1.012	1.716	0	1.97	0	1.806	1.142	1.977
Chr1L	53505197	53505698	L_prox_hi_1037	proximal_high_conf	0.222	2.69	1.864	1.716	1.665	1.59	1.144	4.053	5.911	0	2.107	3.427	2.307
Chr1L	53505612	53506113	L_prox_hi_1038	proximal_high_conf	0.333	4.346	3.154	2.746	1.409	1.879	2.098	4.053	5.911	0	3.612	4.569	6.261
Chr1L	53764384	53764885	L_dist_noab_1039	distal_noab_high	0.333	0	1.003	0	0.768	0.723	0.572	0	0	0	0	0.857	2.966
Chr1L	53966195	53966696	L_dist_lo_1040	distal_low_conf	0.222	0.414	0.86	0	1.025	0.145	0.381	0	0	0	2.107	1.999	0.659
Chr1L	53970890	53971391	L_dist_lo_1041	distal_low_conf	0.444	1.449	0.717	1.03	0.768	0.723	0.572	0	0	0	2.107	0.571	0.33
Chr1L	53980135	53980636	L_dist_lo_1042	distal_low_conf	0	0.621	0.717	0	0.64	0.434	0.381	0	0	0	3.01	0	2.307
Chr1L	54056608	54057109	L_dist_lo_1043	distal_low_conf	0.665	2.069	3.87	1.716	0.64	5.203	5.531	0	0	0	2.408	2.856	0.989
Chr1L	54057129	54057630	L_dist_hi_1044	distal_high_conf	0.554	2.897	1.29	2.746	1.793	3.035	4.959	0	0	0	3.01	2.285	1.648
Chr1L	54070015	54070516	L_dist_noab_1045	distal_noab_high	0.776	1.035	0.717	1.03	1.409	2.601	2.861	0	0	0	2.408	4.855	2.636
Chr1L	54075820	54076321	L_prox_hi_1046	proximal_high_conf	0.222	3.518	5.734	1.716	1.281	2.023	3.624	0	5.911	0	3.01	3.713	2.966
Chr1L	54076453	54076954	L_prox_hi_1047	proximal_high_conf	0.333	3.725	3.01	1.373	1.281	2.89	4.196	0	1.97	0	3.612	2.285	3.295
Chr1L	54085327	54085828	L_dist_noab_1048	distal_noab_high	0.665	0.621	0.43	1.03	1.409	0.434	1.716	0	0	0	1.204	2.856	0.989
Chr1L	54156076	54156577	L_dist_noab_1049	distal_noab_high	0.444	0.621	0.143	0	0.256	0.145	0	0	0	0	1.505	0.857	0.989
Chr1L	54218023	54218524	L_dist_noab_1050	distal_noab_high	0.444	0.828	1.29	1.03	0.512	0.289	2.67	0	0	0	2.709	3.427	0.659
Chr1L	54218936	54219437	L_prox_hi_1051	proximal_high_conf	0.222	2.483	2.007	1.716	1.281	1.59	2.67	0	1.97	0	1.806	1.999	1.648
Chr1L	54219204	54219705	L_prox_hi_1052	proximal_high_conf	0.554	3.104	2.15	2.403	1.409	2.023	3.051	0	1.97	0	3.01	4.284	2.307
Chr1L	54237636	54238137	L_prox_hi_1053	proximal_high_conf	0.222	3.311	1.864	3.776	1.921	1.445	1.716	0	1.97	0	5.116	6.283	6.591
Chr1L	54317694	54318195	L_dist_lo_1054	distal_low_conf	0.222	0.621	0.287	0.686	1.025	0.578	1.144	0	0	0	2.107	2.57	0.33
Chr1L	54320328	54320829	L_prox_hi_1055	proximal_high_conf	0.111	1.656	3.01	1.373	1.025	2.023	1.716	0	1.97	0	6.621	4.284	4.614
Chr1L	54320966	54321467	L_prox_lo_1056	proximal_low_conf	0.444	2.483	4.014	2.403	1.025	1.301	2.67	0	3.941	0	3.01	0.571	2.307
Chr1L	54343907	54344408	L_dist_noab_1057	distal_noab_high	0.665	0.414	0.573	2.059	0.768	0.434	0.191	0	0	0	1.505	1.428	0.33
Chr1L	54346381	54346882	L_prox_hi_1058	proximal_high_conf	0.444	3.725	5.734	3.776	2.177	3.179	3.242	12.158	5.911	16.667	3.01	5.426	2.966
Chr1L	54381746	54382247	L_dist_noab_1059	distal_noab_high	0.776	1.449	0.287	0.343	1.153	1.734	2.861	0	0	8.334	3.01	2.285	0.989
Chr1L	54396045	54396546	L_dist_hi_1060	distal_high_conf	0.444	4.346	5.877	2.059	1.153	4.769	7.819	0	0	0	1.204	4.284	2.307
Chr1L	54406576	54407077	L_dist_hi_1061	distal_high_conf	0.333	2.897	1.29	1.03	0.64	5.058	9.154	4.053	1.97	0	4.514	7.425	4.943
Chr1L	54409193	54409694	L_prox_noab_1062	proximal_noab_high	0.665	1.242	1.433	0	1.025	3.179	5.149	0	1.97	0	5.116	3.141	1.977
Chr1L	54413235	54413736	L_dist_lo_1063	distal_low_conf	0.665	2.069	2.437	0.686	1.153	2.312	3.814	0	0	0	2.709	2.57	1.977
Chr1L	54424507	54425008	L_dist_lo_1064	distal_low_conf	0.222	1.449	0.717	0	0.512	2.457	3.433	8.106	1.97	0	0.602	2.285	0.659
Chr1L	54647298	54647799	L_dist_noab_1065	distal_noab_high	0.554	0.828	0.573	0.343	1.025	0.289	0.763	0	0	0	2.107	1.714	0.989
Chr1L	54651281	54651782	L_dist_noab_1066	distal_noab_high	0.444	1.242	0.287	1.373	0.512	0.723	1.144	0	0	0	1.505	1.714	1.977
Chr1L	54702811	54703312	L_prox_noab_1067	proximal_noab_high	0.887	1.449	1.577	1.373	1.281	1.012	1.144	0	1.97	0	3.01	2.856	3.295
Chr1L	54754376	54754877	L_dist_noab_1068	distal_noab_high	0.333	0	0.143	0	0	0.434	0.191	0	0	8.334	2.709	1.714	0.659
Chr1L	54757971	54758472	L_dist_noab_1069	distal_noab_high	0.222	0	0	0.343	0.128	1.301	0.954	4.053	1.97	0	4.213	2.57	2.307
Chr1L	54761107	54761608	L_dist_noab_1070	distal_noab_high	0.998	0.207	0.143	0.686	0.128	0.723	0.572	0	1.97	0	4.213	3.427	4.943
Chr1L	54764247	54764748	L_dist_noab_1071	distal_noab_high	0.222	0.414	0.143	0.343	0	0.867	0.191	0	0	0	0.903	2.285	0.659
Chr1L	54905442	54905943	L_prox_lo_1072	proximal_low_conf	0.665	2.276	3.44	1.716	1.409	2.457	2.861	8.106	0	0	0.602	1.999	2.307
Chr1L	55045377	55045878	L_dist_hi_1073	distal_high_conf	0.222	2.69	2.437	2.746	1.409	2.601	2.098	4.053	5.911	8.334	3.612	2.285	6.92
Chr1L	55857936	55858437	L_dist_noab_1074	distal_noab_high	1.442	3.311	3.727	1.716	1.025	3.324	4.959	0	1.97	0	3.912	2.856	1.648
Chr1L	55951570	55952071	L_dist_noab_1075	distal_noab_high	0.554	0.207	0.43	0.343	0.768	1.156	0.572	0	0	0	0.602	1.428	1.977
Chr1L	55995252	55995753	L_dist_lo_1076	distal_low_conf	0.222	1.449	0.43	0.686	0.256	2.89	4.768	0	0	0	1.204	2.57	1.318
Chr1L	55997615	55998116	L_dist_lo_1077	distal_low_conf	0.554	2.276	1.72	1.03	0.512	4.191	6.103	0	0	0	3.311	1.999	1.648
Chr1L	56030002	56030503	L_dist_hi_1078	distal_high_conf	0.554	3.311	2.724	2.059	0.897	1.59	2.67	0	1.97	0	2.408	1.999	1.977
Chr1L	56040947	56041448	L_dist_hi_1079	distal_high_conf	0.665	4.967	8.028	2.059	1.409	3.468	6.103	0	0	0	4.514	3.998	2.307
Chr1L	56042207	56042708	L_prox_hi_1080	proximal_high_conf	0.444	4.139	4.731	1.03	0.768	3.035	4.959	4.053	0	0	3.612	4.855	1.648
Chr1L	56119826	56120327	L_dist_noab_1081	distal_noab_high	0.554	0.828	1.147	1.03	0.897	0.434	1.144	0	0	0	0.602	1.999	0.989
Chr1L	56126679	56127180	L_dist_noab_1082	distal_noab_high	0.665	1.656	1.147	0.686	0.384	1.012	1.907	0	1.97	0	2.709	1.142	2.636
Chr1L	56127145	56127646	L_dist_lo_1083	distal_low_conf	0.444	1.656	0.717	1.03	0.512	1.301	2.098	0	1.97	0	2.107	2.57	1.648
Chr1L	56141665	56142166	L_prox_lo_1084	proximal_low_conf	0.665	2.483	1.72	1.03	0.512	1.59	2.861	4.053	3.941	0	6.019	4.569	2.307
Chr1L	56141972	56142473	L_prox_noab_1085	proximal_noab_high	0.776	1.863	1.72	0.686	0.768	2.168	2.67	4.053	7.882	0	2.709	5.426	3.295
Chr1L	56142403	56142904	L_prox_lo_1086	proximal_low_conf	0.222	0.828	1.72	0.343	0.384	0.867	1.907	4.053	9.852	0	1.806	2.285	1.648
Chr1L	56162548	56163049	L_prox_hi_1087	proximal_high_conf	0.554	2.897	1.433	2.403	0.768	1.301	1.907	12.158	1.97	8.334	1.204	3.141	3.954
Chr1L	56198017	56198518	L_prox_hi_1088	proximal_high_conf	0.554	1.242	2.007	0.343	1.409	1.445	2.479	4.053	1.97	0	3.612	1.428	2.307
Chr1L	56200683	56201184	L_dist_lo_1089	distal_low_conf	0	0.414	0.143	0.686	0.256	0.434	0.763	0	0	0	1.505	1.142	1.977
Chr1L	56203381	56203882	L_prox_lo_1090	proximal_low_conf	0.554	1.242	2.58	1.03	1.025	2.023	3.051	4.053	0	0	3.01	1.999	3.295
Chr1L	56340587	56341088	L_prox_lo_1091	proximal_low_conf	0.665	1.035	2.007	1.373	2.305	0.723	2.67	0	5.911	0	0.903	1.999	3.295
Chr1L	56453268	56453769	L_prox_lo_1092	proximal_low_conf	0.776	3.104	1.864	0.343	1.409	2.89	3.624	0	1.97	0	4.213	4.284	3.625
Chr1L	56454919	56455420	L_dist_noab_1093	distal_noab_high	0.333	0.414	0.143	0.686	0.128	0.434	0.191	0	1.97	0	1.505	0.857	0.989
Chr1L	56458772	56459273	L_dist_lo_1094	distal_low_conf	0.111	0.621	0.43	0	0.384	0.867	1.716	0	0	0	1.806	2.856	0.989
Chr1L	56461331	56461832	L_prox_noab_1095	proximal_noab_high	0.222	0.621	0.287	0.343	0.512	0.867	0.954	0	1.97	0	2.709	1.999	1.977
Chr1L	56461814	56462315	L_prox_hi_1096	proximal_high_conf	0.111	1.656	1.003	2.746	1.025	1.445	2.861	0	1.97	8.334	3.01	4.855	2.636
Chr1L	56462115	56462616	L_prox_hi_1097	proximal_high_conf	0.111	1.449	1.72	3.776	1.665	2.457	4.005	0	1.97	8.334	3.912	4.284	3.295
Chr1L	56462494	56462995	L_dist_hi_1098	distal_high_conf	0.333	1.863	2.437	1.373	1.793	1.301	3.433	0	0	0	4.514	2.57	4.284
Chr1L	56670175	56670676	L_dist_lo_1099	distal_low_conf	0.444	0.828	1.003	1.03	0.897	1.59	2.67	0	0	16.667	1.204	1.714	2.636
Chr1L	56687691	56688192	L_dist_hi_1100	distal_high_conf	0.111	1.242	1.003	0.343	2.305	1.301	1.716	0	1.97	0	2.709	2.285	3.295
Chr1L	56690167	56690668	L_prox_hi_1101	proximal_high_conf	0.333	1.863	3.44	0.343	2.305	0.434	0.954	4.053	3.941	8.334	2.709	3.713	3.295
Chr1L	56739157	56739658	L_dist_lo_1102	distal_low_conf	0.665	3.311	2.437	0.343	1.153	3.902	2.67	4.053	1.97	0	3.311	4.855	1.648
Chr1L	56797380	56797881	L_dist_noab_1103	distal_noab_high	0.554	1.863	0.43	1.03	0.256	2.746	3.051	0	0	0	3.01	5.426	3.295
Chr1L	56821335	56821836	L_prox_noab_1104	proximal_noab_high	0.554	1.656	0.573	0	1.409	0.289	0	0	0	0	1.505	2.285	1.318
Chr1L	57097810	57098311	L_prox_lo_1105	proximal_low_conf	0.665	2.276	3.584	0.343	1.281	1.879	2.289	8.106	1.97	0	4.213	3.998	2.966
Chr1L	57197872	57198373	L_prox_lo_1106	proximal_low_conf	0.333	0.621	0.43	0.686	1.409	0.434	0.381	0	0	0	1.505	0.857	0
Chr1L	57397227	57397728	L_prox_noab_1107	proximal_noab_high	1.109	1.035	1.433	2.403	0.897	1.012	1.716	0	1.97	0	2.709	2.856	2.966
Chr1L	57568134	57568635	L_prox_lo_1108	proximal_low_conf	0	0.414	0.86	0.686	0.384	0.578	0.191	0	1.97	0	0.602	2.57	0.989
Chr1L	57570055	57570556	L_dist_hi_1109	distal_high_conf	0.333	1.449	1.864	1.03	0.384	0.723	3.433	0	1.97	0	2.107	1.714	1.318
Chr1L	57696747	57697248	L_prox_lo_1110	proximal_low_conf	0.222	1.035	1.003	0.343	0.512	0.723	0.763	0	0	8.334	2.107	1.999	2.307
Chr1L	57710678	57711179	L_dist_hi_1111	distal_high_conf	0.554	1.242	1.29	2.059	0.64	1.59	3.624	0	1.97	0	3.01	2.57	1.977
Chr1L	57727791	57728292	L_dist_noab_1112	distal_noab_high	0.444	0.207	0.287	0	0.384	0.578	1.144	0	1.97	0	1.204	1.999	0
Chr1L	57806385	57806886	L_prox_hi_1113	proximal_high_conf	0.333	1.656	2.437	2.403	1.025	0.867	2.861	12.158	3.941	8.334	1.505	2.856	1.977
Chr1L	57888543	57889044	L_prox_hi_1114	proximal_high_conf	0.222	2.483	2.437	1.716	1.153	1.301	2.67	12.158	0	0	2.709	1.999	1.318
Chr1L	57947242	57947743	L_prox_lo_1115	proximal_low_conf	0.333	1.656	1.433	0.343	0.897	1.59	2.479	4.053	0	0	2.107	4.284	2.307
Chr1L	58278769	58279270	L_dist_hi_1116	distal_high_conf	0.333	2.069	2.867	1.716	1.153	5.781	8.392	4.053	1.97	0	10.233	7.14	3.954
Chr1L	58284124	58284625	L_prox_lo_1117	proximal_low_conf	1.22	4.967	8.458	2.059	1.025	3.757	7.819	0	0	0	6.922	7.997	1.977
Chr1L	58284605	58285106	L_prox_hi_1118	proximal_high_conf	0.665	4.76	7.598	2.746	1.281	5.203	9.345	4.053	3.941	0	4.815	4.855	2.966
Chr1L	58284987	58285488	L_prox_hi_1119	proximal_high_conf	0.111	3.518	4.731	1.716	1.153	5.492	6.484	8.106	1.97	0	3.311	4.569	1.648
Chr1L	58285342	58285843	L_prox_lo_1120	proximal_low_conf	0	1.449	2.58	0.686	0.768	3.902	3.242	4.053	0	0	2.709	3.141	0.33
Chr1L	58286191	58286692	L_dist_lo_1121	distal_low_conf	0.665	2.069	2.867	1.373	0.256	2.168	5.531	4.053	1.97	0	2.408	1.714	2.307
Chr1L	58288226	58288727	L_dist_lo_1122	distal_low_conf	0.111	0.621	1.003	0	0	1.59	1.716	0	0	0	0.602	2.57	0.33
Chr1L	58288953	58289454	L_dist_lo_1123	distal_low_conf	0.333	2.276	1.577	0.686	1.281	1.012	1.144	0	1.97	0	1.806	3.998	0.659
Chr1L	58334546	58335047	L_prox_noab_1124	proximal_noab_high	0.554	0.828	0.43	0.343	0.384	0.578	0.572	0	0	0	0.602	2.57	0.989
Chr1L	58429634	58430135	L_dist_noab_1125	distal_noab_high	1.109	1.863	2.724	0.686	1.409	2.457	3.242	0	0	0	3.01	6.569	1.318
Chr1L	58431635	58432136	L_dist_lo_1126	distal_low_conf	0.665	1.449	2.007	1.373	1.153	1.734	1.526	4.053	1.97	0	1.505	3.713	1.648
Chr1L	58432666	58433167	L_dist_hi_1127	distal_high_conf	0.111	1.449	2.724	1.373	1.409	1.734	3.814	0	0	0	2.107	1.142	1.648
Chr1L	58434036	58434537	L_prox_hi_1128	proximal_high_conf	0.665	2.69	4.444	1.716	1.537	3.324	4.386	0	5.911	0	3.612	4.284	3.625
Chr1L	58435030	58435531	L_prox_lo_1129	proximal_low_conf	0.554	1.656	1.864	1.716	0.897	0.434	2.098	12.158	0	0	3.311	1.999	0.659
Chr1L	58435311	58435812	L_dist_hi_1130	distal_high_conf	0.444	1.656	1.29	1.716	0.768	0.578	1.335	12.158	0	0	2.408	2.856	1.648
Chr1L	58614280	58614781	L_dist_noab_1131	distal_noab_high	1.331	0.828	1.577	1.03	0.64	1.879	3.051	0	0	0	0.903	1.714	2.307
Chr1L	58636181	58636682	L_dist_hi_1132	distal_high_conf	0.776	3.104	2.294	3.432	0.897	4.046	6.103	0	1.97	0	4.514	8.282	2.307
Chr1L	58636994	58637495	L_prox_noab_1133	proximal_noab_high	0.776	2.897	1.147	1.373	0.64	3.902	6.294	0	1.97	0	2.408	4.569	0.989
Chr1L	58640442	58640943	L_dist_noab_1134	distal_noab_high	0.776	2.276	1.29	1.03	1.025	2.312	5.34	0	1.97	0	4.815	3.141	0.989
Chr1L	58643778	58644279	L_dist_noab_1135	distal_noab_high	0.776	2.069	2.15	0.686	1.409	3.613	3.433	0	0	0	3.311	4.284	3.295
Chr1L	58644475	58644976	L_dist_hi_1136	distal_high_conf	0.665	2.483	2.15	1.03	1.665	3.179	7.629	4.053	0	0	2.408	3.427	1.648
Chr1L	58644760	58645261	L_dist_hi_1137	distal_high_conf	0.665	2.897	2.15	0.343	1.409	4.191	5.912	4.053	0	0	2.709	2.285	2.307
Chr1L	58646554	58647055	L_dist_lo_1138	distal_low_conf	0.554	1.035	1.577	1.03	1.025	2.601	4.577	4.053	1.97	0	4.213	3.141	1.648
Chr1L	58647465	58647966	L_dist_lo_1139	distal_low_conf	0.554	1.035	2.007	1.03	0.64	1.879	4.577	4.053	0	8.334	4.514	2.57	0.989
Chr1L	58648332	58648833	L_prox_hi_1140	proximal_high_conf	0.333	2.069	3.44	1.373	1.153	3.035	7.629	4.053	5.911	0	4.213	3.141	3.295
Chr1L	58651016	58651517	L_dist_lo_1141	distal_low_conf	0.444	1.449	2.437	1.03	0.897	2.89	6.484	0	0	0	2.107	2.285	0.659
Chr1L	58651345	58651846	L_dist_lo_1142	distal_low_conf	0.333	1.035	2.15	1.373	0.768	2.168	7.056	0	0	0	3.01	2.285	0.33
Chr1L	58652396	58652897	L_dist_lo_1143	distal_low_conf	0.444	1.656	3.44	1.03	0.512	1.879	4.577	0	0	0	0.602	3.713	3.625
Chr1L	58695683	58696184	L_dist_noab_1144	distal_noab_high	0.444	1.449	1.577	0	0.64	1.59	4.196	8.106	1.97	0	1.505	1.999	1.648
Chr1L	58701112	58701613	L_dist_lo_1145	distal_low_conf	0.111	1.035	2.007	2.746	0.64	2.023	3.051	4.053	0	8.334	3.912	2.856	0.659
Chr1L	58775155	58775656	L_prox_noab_1146	proximal_noab_high	0.776	1.449	0.573	2.059	0.768	1.156	0.572	0	0	0	1.204	1.714	0.989
Chr1L	58775879	58776380	L_prox_hi_1147	proximal_high_conf	0.776	1.863	2.867	2.403	1.665	1.156	2.861	8.106	1.97	0	3.912	3.713	3.625
Chr1L	58862770	58863271	L_dist_lo_1148	distal_low_conf	0.111	0.828	0.573	1.373	0	1.012	0.763	0	0	8.334	1.505	1.714	1.318
Chr1L	58872211	58872712	L_prox_hi_1149	proximal_high_conf	0.665	2.276	3.297	0.343	1.409	1.59	3.433	12.158	5.911	0	3.912	3.427	4.614
Chr1L	58962087	58962588	L_dist_lo_1150	distal_low_conf	0.444	0.828	0.717	2.403	0.384	0.578	0.572	0	1.97	0	1.505	1.428	0
Chr1L	58976114	58976615	L_prox_hi_1151	proximal_high_conf	0.444	4.967	2.007	2.746	1.537	1.879	2.861	8.106	3.941	0	4.815	4.855	5.602
Chr1L	58976691	58977192	L_dist_hi_1152	distal_high_conf	0.665	3.932	3.154	2.403	2.305	1.879	1.144	0	5.911	0	5.417	2.57	3.954
Chr1L	59049549	59050050	L_dist_noab_1153	distal_noab_high	0.554	2.069	0.717	1.03	0.64	0.867	1.716	4.053	0	0	2.408	2.856	2.307
Chr1L	59051857	59052358	L_dist_noab_1154	distal_noab_high	0.444	1.035	1.003	1.03	0.384	1.012	2.098	0	1.97	0	1.204	1.142	0.989
Chr1L	59487287	59487788	L_prox_hi_1155	proximal_high_conf	0.333	2.069	1.72	2.746	1.025	0.867	1.144	4.053	1.97	0	2.107	2.57	2.636
Chr1L	59652489	59652990	L_prox_hi_1156	proximal_high_conf	0.665	3.311	4.014	2.403	0.64	3.613	5.531	0	0	8.334	3.01	5.141	1.648
Chr1L	59652907	59653408	L_prox_hi_1157	proximal_high_conf	0.444	3.104	5.877	3.432	1.281	3.757	7.056	4.053	1.97	8.334	4.514	6.569	4.943
Chr1L	59658981	59659482	L_dist_hi_1158	distal_high_conf	0.665	4.346	4.3	1.716	0.64	3.613	6.103	0	0	0	2.709	3.141	1.648
Chr1L	59702677	59703178	L_dist_lo_1159	distal_low_conf	0.998	3.518	5.447	2.746	0.384	2.89	4.386	0	3.941	0	2.408	3.141	0.33
Chr1L	59709439	59709940	L_prox_hi_1160	proximal_high_conf	0.665	3.104	5.734	1.373	2.562	3.179	4.959	4.053	3.941	8.334	6.621	3.998	4.284
Chr1L	59709962	59710463	L_prox_hi_1161	proximal_high_conf	0.444	3.311	5.877	2.746	1.921	3.902	6.484	0	5.911	0	4.213	5.141	2.636
Chr1L	59791808	59792309	L_prox_lo_1162	proximal_low_conf	0.554	2.897	0.717	0.686	1.281	2.601	1.335	0	3.941	0	6.922	7.425	5.273
Chr1L	59809793	59810294	L_prox_hi_1163	proximal_high_conf	0.333	4.967	3.297	2.403	2.562	3.035	2.289	16.211	7.882	0	9.631	10.852	8.568
Chr1L	59810362	59810863	L_prox_hi_1164	proximal_high_conf	0.665	3.518	4.587	2.403	1.921	2.168	2.479	8.106	3.941	0	3.612	3.998	2.636
Chr1L	60028385	60028886	L_dist_hi_1165	distal_high_conf	0.444	1.656	2.58	1.716	1.025	0.723	1.335	4.053	1.97	0	2.408	3.998	1.318
Chr1L	60028945	60029446	L_dist_hi_1166	distal_high_conf	0.111	6.002	6.737	7.551	2.433	1.879	1.526	0	1.97	0	2.709	5.712	5.273
Chr1L	60029328	60029829	L_dist_hi_1167	distal_high_conf	0.554	5.174	6.881	4.462	1.537	1.734	3.051	0	0	0	2.709	2.57	1.648
Chr1L	60031678	60032179	L_dist_noab_1168	distal_noab_high	0.776	1.656	2.437	0.686	0.768	1.012	2.098	0	1.97	0	3.311	2.856	1.648
Chr1L	60032252	60032753	L_dist_hi_1169	distal_high_conf	0.444	1.656	1.003	1.03	0.768	1.301	3.433	4.053	5.911	0	1.505	3.998	2.307
Chr1L	60032600	60033101	L_prox_hi_1170	proximal_high_conf	0.222	2.69	1.72	2.746	0.768	1.156	2.289	4.053	9.852	0	3.311	4.855	1.977
Chr1L	60033506	60034007	L_prox_hi_1171	proximal_high_conf	0.776	2.276	4.874	3.432	2.433	1.445	2.289	0	13.793	8.334	5.417	7.14	5.602
Chr1L	60035344	60035845	L_dist_hi_1172	distal_high_conf	0.222	3.104	4.3	2.059	0.897	1.879	1.144	4.053	5.911	0	2.107	3.141	3.295
Chr1L	60035679	60036180	L_dist_hi_1173	distal_high_conf	0.776	3.725	5.447	2.059	2.177	1.59	1.716	4.053	5.911	8.334	3.311	3.998	3.625
Chr1L	60106960	60107461	L_dist_noab_1174	distal_noab_high	0.776	1.449	1.003	2.403	0.64	0.578	1.335	4.053	1.97	0	0.301	1.428	3.295
Chr1L	60299569	60300070	L_prox_hi_1175	proximal_high_conf	0.111	1.863	1.864	1.373	2.818	1.734	0.381	4.053	5.911	0	2.107	1.999	4.284
Chr1L	60299954	60300455	L_prox_hi_1176	proximal_high_conf	0.222	3.311	3.584	3.432	2.049	1.734	1.716	0	0	0	2.709	3.713	3.625
Chr1L	60300385	60300886	L_prox_hi_1177	proximal_high_conf	0.887	2.897	2.867	3.089	1.537	1.301	2.098	8.106	1.97	0	3.01	5.712	3.295
Chr1L	60308105	60308606	L_dist_noab_1178	distal_noab_high	0.554	0.414	0	0	0.384	0.145	1.144	0	1.97	0	0.903	1.142	1.318
Chr1L	60396809	60397310	L_dist_lo_1179	distal_low_conf	0.222	1.242	1.29	0	0.512	0.434	0.191	0	0	16.667	1.505	1.142	1.318
Chr1L	60528622	60529123	L_prox_hi_1180	proximal_high_conf	0.665	1.449	2.15	1.373	2.305	1.012	0.572	4.053	7.882	0	2.408	2.285	4.284
Chr1L	60529189	60529690	L_prox_hi_1181	proximal_high_conf	0.222	1.863	3.44	1.03	1.793	1.734	2.67	0	3.941	0	2.709	4.569	2.636
Chr1L	60529795	60530296	L_prox_lo_1182	proximal_low_conf	0.444	1.656	1.72	0.686	0.768	1.445	1.526	0	3.941	0	3.01	1.999	1.318
Chr1L	60739467	60739968	L_dist_lo_1183	distal_low_conf	0.222	0.828	0.573	1.03	1.025	1.156	1.716	0	0	0	1.204	2.57	1.318
Chr1L	60844961	60845462	L_prox_hi_1184	proximal_high_conf	0.444	1.449	2.007	1.373	1.793	1.879	2.289	0	3.941	0	3.01	1.428	1.648
Chr1L	60845577	60846078	L_prox_hi_1185	proximal_high_conf	0.444	2.69	3.44	2.059	1.281	3.035	1.144	8.106	5.911	0	3.912	3.713	3.295
Chr1L	60905456	60905957	L_prox_noab_1186	proximal_noab_high	1.109	3.104	1.433	1.03	1.665	1.156	1.144	8.106	0	0	3.912	3.998	4.943
Chr1L	60958566	60959067	L_dist_noab_1187	distal_noab_high	0.998	1.656	2.15	1.716	0.64	0.867	1.144	0	0	0	2.408	1.714	1.318
Chr1L	61189314	61189815	L_dist_noab_1188	distal_noab_high	0.554	0	0	0.343	0	0.578	0.381	4.053	1.97	0	4.815	4.284	1.318
Chr1L	61189687	61190188	L_dist_noab_1189	distal_noab_high	0.333	0	0.143	0.343	0	0.434	0.191	0	1.97	0	2.408	3.427	0.33
Chr1L	61190553	61191054	L_dist_lo_1190	distal_low_conf	0	0	0	0.343	0.256	0.578	0.381	4.053	0	0	1.806	1.714	0.659
Chr1L	61191864	61192365	L_dist_noab_1191	distal_noab_high	0.111	0	0.287	0.343	0.128	0.434	0.381	4.053	0	0	5.116	5.712	0.33
Chr1L	61192107	61192608	L_dist_noab_1192	distal_noab_high	0.222	0	0.143	0.343	0.256	0.434	0.381	4.053	0	0	6.621	5.997	0.33
Chr1L	61193454	61193955	L_dist_noab_1193	distal_noab_high	0.444	0	0	0	0.128	0.145	0.191	0	1.97	0	2.709	1.428	1.318
Chr1L	61221434	61221935	L_dist_noab_1194	distal_noab_high	0.554	0.621	0.287	0	1.025	0.434	0.381	0	1.97	0	1.806	2.285	1.318
Chr1L	61235744	61236245	L_dist_noab_1195	distal_noab_high	0.444	0	0.287	0.686	0.128	0.289	0.191	8.106	11.823	0	17.155	10.852	0.33
Chr1L	61237897	61238398	L_dist_noab_1196	distal_noab_high	0.998	0.621	0	0	0.128	1.012	0.763	0	3.941	0	3.01	3.141	0
Chr1L	61238616	61239117	L_dist_noab_1197	distal_noab_high	3.216	0.414	0.43	1.373	1.153	2.89	1.335	0	5.911	0	11.737	10.852	0
Chr1L	61239671	61240172	L_prox_noab_1198	proximal_noab_high	0.111	0	0	0	0.128	0.434	0.381	4.053	7.882	0	13.844	10.852	1.318
Chr1L	61240262	61240763	L_prox_noab_1199	proximal_noab_high	0.333	0	0	0	0	0	0.381	0	5.911	0	7.524	4.284	0.33
Chr1L	61240630	61241131	L_prox_noab_1200	proximal_noab_high	0.444	0	0	0	0.128	0.145	0	4.053	3.941	0	2.107	3.427	0.659
Chr1L	61242224	61242725	L_dist_noab_1201	distal_noab_high	1.22	0	0.573	1.03	1.153	1.012	0.191	8.106	9.852	8.334	14.145	11.709	4.614
Chr1L	61243421	61243922	L_dist_noab_1202	distal_noab_high	8.206	0.414	1.72	2.746	2.818	7.37	2.861	68.898	163.549	41.668	157.703	118.806	34.931
Chr1L	61244653	61245154	L_dist_noab_1203	distal_noab_high	0.222	0	0	0.343	0	0.145	0	0	1.97	0	2.709	1.428	0
Chr1L	61244978	61245479	L_dist_noab_1204	distal_noab_high	0.444	0	0	0.343	0	0.289	0.191	8.106	3.941	0	6.922	4.569	0
Chr1L	61245400	61245901	L_dist_noab_1205	distal_noab_high	3.216	1.035	0.287	1.03	1.409	3.757	0.381	24.317	27.587	8.334	29.795	28.845	6.92
Chr1L	61246964	61247465	L_dist_lo_1206	distal_low_conf	0.222	0.207	0.573	0.686	0.768	0.867	0.191	4.053	5.911	0	6.019	5.712	2.636
Chr1L	61256746	61257247	L_dist_noab_1207	distal_noab_high	0.333	0.207	0.287	1.03	0.384	0.289	0	0	1.97	0	1.806	2.285	0.659
Chr1L	61270502	61271003	L_dist_noab_1208	distal_noab_high	1.22	1.449	2.724	2.403	0.897	2.601	2.479	4.053	1.97	0	1.806	2.856	2.966
Chr1L	61371674	61372175	L_dist_noab_1209	distal_noab_high	0.776	1.035	0.287	0.686	0.64	0.723	0.572	0	0	0	1.505	1.714	0.33
Chr1L	61550883	61551384	L_dist_hi_1210	distal_high_conf	0.444	1.449	1.72	1.373	0.512	0.723	0.381	0	1.97	8.334	1.505	1.999	1.648
Chr1L	61551160	61551661	L_dist_noab_1211	distal_noab_high	0.998	2.276	2.437	2.403	0.768	0.867	0.572	0	1.97	8.334	2.408	1.999	1.648
Chr1L	61556849	61557350	L_dist_lo_1212	distal_low_conf	0.333	0.828	1.72	1.03	0.897	0.723	1.335	8.106	0	0	2.709	0.857	2.636
Chr1L	61557403	61557904	L_dist_hi_1213	distal_high_conf	0.333	1.242	2.58	1.03	0.64	1.012	1.144	0	5.911	0	3.01	3.427	1.977
Chr1L	61557879	61558380	L_prox_hi_1214	proximal_high_conf	0.222	1.035	2.007	1.03	1.281	1.012	1.526	0	5.911	0	2.107	3.427	3.954
Chr1L	61558947	61559448	L_prox_hi_1215	proximal_high_conf	0.887	1.863	2.58	3.089	0.64	0.723	1.144	4.053	5.911	8.334	3.01	3.713	2.307
Chr1L	61601826	61602327	L_prox_noab_1216	proximal_noab_high	1.22	2.276	2.58	2.403	2.433	1.156	1.907	4.053	5.911	0	3.01	5.141	3.954
Chr1L	61602028	61602529	L_prox_hi_1217	proximal_high_conf	0.887	2.069	2.437	3.432	2.049	1.156	2.479	0	7.882	0	3.311	4.284	4.614
Chr1L	61602355	61602856	L_prox_hi_1218	proximal_high_conf	0.665	2.276	2.294	3.432	1.537	1.59	2.67	4.053	5.911	8.334	3.612	4.284	3.954
Chr1L	61603762	61604263	L_dist_lo_1219	distal_low_conf	0.222	0.414	2.007	3.089	1.281	0.578	1.907	0	0	0	0.602	2.285	1.648
Chr1L	61696264	61696765	L_dist_noab_1220	distal_noab_high	0.444	0.828	0.573	0.343	0.512	1.156	0.381	0	0	8.334	1.505	2.285	1.318
Chr1L	61774282	61774783	L_prox_hi_1221	proximal_high_conf	0.333	1.656	2.294	2.746	0.897	2.601	3.814	0	5.911	0	1.806	2.57	3.954
Chr1L	61871251	61871752	L_prox_hi_1222	proximal_high_conf	0.444	1.656	1.433	1.373	1.409	1.879	3.433	0	3.941	0	3.311	4.284	3.625
Chr1L	61982618	61983119	L_dist_noab_1223	distal_noab_high	0.776	0.621	0.43	0.343	0.512	0.578	0.381	0	0	0	1.204	1.142	0.659
Chr1L	62054867	62055368	L_dist_noab_1224	distal_noab_high	0.554	0.414	0.143	0.686	1.153	0.145	0.381	0	1.97	0	0.301	0.571	1.977
Chr1L	62108987	62109488	L_prox_hi_1225	proximal_high_conf	0.222	2.897	3.297	1.716	0.512	2.746	3.814	0	3.941	0	4.514	4.569	3.625
Chr1L	62110012	62110513	L_prox_lo_1226	proximal_low_conf	0.665	2.276	4.3	0.686	1.153	3.902	4.577	0	0	8.334	5.116	6.283	5.273
Chr1L	62405270	62405771	L_dist_noab_1227	distal_noab_high	0.444	0.414	0.86	1.03	0.512	0.578	0.572	0	0	0	1.505	1.142	0.989
Chr1L	62407286	62407787	L_prox_hi_1228	proximal_high_conf	0.554	3.311	2.294	1.373	2.049	2.168	1.907	0	7.882	16.667	4.213	2.57	4.943
Chr1L	62408010	62408511	L_prox_hi_1229	proximal_high_conf	0.554	3.311	2.294	3.089	1.921	1.734	2.098	4.053	1.97	0	1.806	2.285	2.966
Chr1L	62456619	62457120	L_dist_lo_1230	distal_low_conf	0.222	2.483	2.58	1.03	0.768	2.746	3.624	0	0	0	1.204	2.285	0.989
Chr1L	62566909	62567410	L_prox_hi_1231	proximal_high_conf	0.222	2.483	2.867	1.03	1.537	1.734	2.861	8.106	3.941	8.334	3.612	3.713	4.284
Chr1L	62567206	62567707	L_prox_hi_1232	proximal_high_conf	0.665	2.483	3.44	1.716	1.537	2.023	3.624	0	3.941	0	3.311	3.427	2.966
Chr1L	62630237	62630738	L_dist_lo_1233	distal_low_conf	0.333	0.828	1.864	0.686	0.256	0.723	1.526	0	1.97	8.334	0.903	1.999	2.307
Chr1L	62755368	62755869	L_dist_noab_1234	distal_noab_high	0.887	1.035	0.287	1.373	0.897	0.867	0.763	0	0	0	2.107	2.856	0.659
Chr1L	62758983	62759484	L_prox_hi_1235	proximal_high_conf	0.111	2.69	3.297	3.432	1.921	1.445	2.861	4.053	7.882	8.334	6.922	6.283	4.943
Chr1L	62759414	62759915	L_prox_hi_1236	proximal_high_conf	0.222	2.483	3.297	1.716	2.049	2.168	4.386	0	7.882	8.334	5.718	5.712	1.977
Chr1L	62760191	62760692	L_dist_hi_1237	distal_high_conf	0.111	2.069	2.58	1.373	2.177	1.012	2.861	8.106	3.941	8.334	3.01	3.141	2.307
Chr1L	62760791	62761292	L_dist_hi_1238	distal_high_conf	0.333	1.242	2.15	1.716	1.281	2.168	0.954	0	0	0	4.815	5.141	3.954
Chr1L	62762276	62762777	L_dist_noab_1239	distal_noab_high	0.665	1.035	0.143	0.343	0.64	0.723	0.954	0	1.97	0	1.806	1.999	0.989
Chr1L	62802844	62803345	L_dist_noab_1240	distal_noab_high	0.444	1.242	0.573	0.686	0.64	0.867	0.572	0	0	0	1.204	1.142	2.307
Chr1L	62838879	62839380	L_prox_hi_1241	proximal_high_conf	0.333	3.311	3.727	1.03	1.665	2.168	3.624	12.158	3.941	0	5.116	6.283	4.614
Chr1L	62839720	62840221	L_prox_hi_1242	proximal_high_conf	0.333	2.069	2.867	2.746	1.409	1.59	3.051	4.053	3.941	0	5.718	3.427	6.92
Chr1L	62846924	62847425	L_dist_noab_1243	distal_noab_high	0.222	0.207	0.287	0	0.768	0.578	0.572	0	0	0	1.806	1.999	1.977
Chr1L	62927881	62928382	L_dist_hi_1244	distal_high_conf	0.333	2.069	3.01	2.059	1.409	2.746	1.716	0	0	0	1.204	4.855	1.318
Chr1L	62928799	62929300	L_prox_lo_1245	proximal_low_conf	0.222	2.483	2.294	1.03	1.025	2.312	2.098	4.053	0	0	0.602	2.285	0.989
Chr1L	62929422	62929923	L_prox_lo_1246	proximal_low_conf	0.444	1.863	1.864	2.403	1.409	2.601	2.479	4.053	0	0	2.709	1.999	0.659
Chr1L	62931295	62931796	L_dist_lo_1247	distal_low_conf	0	1.035	0.287	0.343	1.025	0.434	1.144	4.053	1.97	0	2.709	2.285	0.989
Chr1L	63067414	63067915	L_dist_noab_1248	distal_noab_high	0.665	0.207	0.43	0.343	0.897	0.578	0.191	0	0	0	2.408	2.57	0.33
Chr1L	63124474	63124975	L_dist_noab_1249	distal_noab_high	0.333	0.414	1.29	0	0.512	0.434	0.191	0	0	0	1.204	1.714	0.659
Chr1L	63584130	63584631	L_dist_lo_1250	distal_low_conf	0.222	1.242	1.577	2.059	1.025	1.59	3.051	0	0	0	1.505	2.856	0.989
Chr1L	63958682	63959183	L_prox_hi_1251	proximal_high_conf	0.222	1.035	1.29	1.373	1.665	0.434	1.335	0	1.97	0	2.709	2.57	3.954
Chr1L	63958932	63959433	L_dist_hi_1252	distal_high_conf	0.111	1.863	0.86	1.03	1.409	0.289	0.763	4.053	1.97	8.334	1.204	2.57	3.295
Chr1L	64177824	64178325	L_prox_noab_1253	proximal_noab_high	0.554	1.242	1.864	0.343	1.153	1.012	2.479	0	0	8.334	3.311	2.856	2.966
Chr1L	64211827	64212328	L_prox_lo_1254	proximal_low_conf	0.444	1.242	1.29	1.716	0.64	1.156	0.381	0	3.941	0	0.903	3.713	2.636
Chr1L	64212270	64212771	L_prox_lo_1255	proximal_low_conf	0.554	1.863	0.86	1.716	0.512	1.301	0.572	4.053	1.97	0	2.408	3.141	2.307
Chr1L	64312804	64313305	L_dist_lo_1256	distal_low_conf	0.333	0.828	0.717	0.343	1.153	0.289	0.763	4.053	1.97	0	1.505	1.999	0.659
Chr1L	64323135	64323636	L_prox_hi_1257	proximal_high_conf	0.222	2.897	3.154	2.746	1.921	1.301	2.289	0	7.882	0	4.213	5.997	7.579
Chr1L	64333084	64333585	L_dist_hi_1258	distal_high_conf	0.333	1.449	1.864	1.03	0.384	2.457	2.67	0	0	0	2.709	1.999	1.977
Chr1L	64341527	64342028	L_prox_hi_1259	proximal_high_conf	0.554	2.897	1.29	2.403	1.153	3.179	4.005	0	0	0	2.709	3.427	2.966
Chr1L	64457419	64457920	L_prox_hi_1260	proximal_high_conf	0.333	0.828	1.29	1.716	1.025	1.59	0.763	0	0	0	3.01	3.713	1.318
Chr1L	64458284	64458785	L_prox_hi_1261	proximal_high_conf	0.222	1.449	2.15	3.089	1.537	0.867	1.144	0	0	0	1.806	1.428	1.977
Chr1L	64552073	64552574	L_dist_noab_1262	distal_noab_high	0.665	0.207	0	0.343	0.128	0.289	0.381	0	0	0	1.505	1.999	0
Chr1L	64720508	64721009	L_prox_hi_1263	proximal_high_conf	0.665	1.863	1.433	1.716	1.153	0.867	1.144	4.053	0	0	3.612	1.999	2.307
Chr1L	64720953	64721454	L_prox_lo_1264	proximal_low_conf	0.665	2.276	2.437	3.089	1.153	1.301	2.861	0	1.97	0	2.107	2.57	1.318
Chr1L	64762803	64763304	L_dist_noab_1265	distal_noab_high	0.444	0.621	0.717	0	0.512	1.012	1.144	0	0	0	2.107	0.571	0.659
Chr1L	64769045	64769546	L_prox_noab_1266	proximal_noab_high	0.998	2.897	2.15	1.03	1.665	0.867	1.526	0	3.941	8.334	1.806	3.141	3.625
Chr1L	64769381	64769882	L_prox_hi_1267	proximal_high_conf	0.444	2.276	1.864	1.716	2.562	1.301	2.098	0	1.97	0	2.709	5.997	4.284
Chr1L	64793689	64794190	L_prox_lo_1268	proximal_low_conf	0.111	0.621	0.287	1.373	0.64	0.289	0.381	0	1.97	8.334	1.204	1.142	1.977
Chr1L	64794648	64795149	L_prox_lo_1269	proximal_low_conf	0.333	0.828	1.864	0.686	0.64	1.301	1.907	0	1.97	0	1.806	2.856	1.648
Chr1L	64840868	64841369	L_dist_noab_1270	distal_noab_high	0.554	0.621	0.573	1.373	1.793	0.723	0.763	0	3.941	0	1.505	2.57	1.318
Chr1L	64841198	64841699	L_dist_lo_1271	distal_low_conf	0.444	0.414	0.717	1.716	1.665	1.012	1.335	0	1.97	0	1.505	1.714	1.318
Chr1L	64849837	64850338	L_dist_noab_1272	distal_noab_high	0.554	0.207	0.573	0	0.512	0.434	0.191	4.053	1.97	0	0.903	1.714	0.989
Chr1L	64863152	64863653	L_prox_lo_1273	proximal_low_conf	0.665	1.242	2.15	1.373	1.281	0.723	1.716	0	1.97	0	2.107	4.284	2.307
Chr1L	64864681	64865182	L_prox_hi_1274	proximal_high_conf	0.111	1.035	1.003	0.686	1.537	0.434	1.144	0	1.97	0	1.806	2.285	2.966
Chr1L	64877499	64878000	L_prox_hi_1275	proximal_high_conf	0.665	2.276	2.867	3.089	1.793	1.879	3.433	4.053	3.941	8.334	2.107	2.856	3.954
Chr1L	64932203	64932704	L_prox_lo_1276	proximal_low_conf	0.333	0.828	1.577	0	1.025	0.289	1.907	8.106	1.97	0	1.505	2.285	1.648
Chr1L	64933004	64933505	L_prox_hi_1277	proximal_high_conf	0.554	1.656	2.15	1.03	2.049	2.746	4.577	0	9.852	0	2.408	4.855	4.614
Chr1L	64963937	64964438	L_dist_lo_1278	distal_low_conf	0.665	1.449	2.15	1.373	1.537	1.879	3.624	0	0	0	0.602	1.714	2.636
Chr1L	64974728	64975229	L_prox_hi_1279	proximal_high_conf	0.444	3.104	3.01	2.403	1.793	2.312	4.768	12.158	1.97	0	3.912	4.855	5.602
Chr1L	64975134	64975635	L_prox_lo_1280	proximal_low_conf	0.554	1.863	2.294	0.686	1.025	1.445	2.861	8.106	1.97	0	2.709	9.71	3.295
Chr1L	65024751	65025252	L_prox_hi_1281	proximal_high_conf	0.222	2.897	2.58	1.03	1.025	1.156	1.144	4.053	3.941	0	4.213	3.141	1.318
Chr1L	65025103	65025604	L_prox_lo_1282	proximal_low_conf	0.111	2.897	2.007	0.686	0.897	1.445	1.526	4.053	0	0	5.116	2.285	2.636
Chr1L	65025559	65026060	L_prox_lo_1283	proximal_low_conf	0.111	1.449	1.147	0.343	0.897	1.156	1.335	4.053	3.941	0	1.505	3.427	1.977
Chr1L	65057662	65058163	L_dist_lo_1284	distal_low_conf	0.333	1.242	1.003	2.059	0.256	2.457	2.67	0	0	0	0.903	2.57	0.989
Chr1L	65071865	65072366	L_dist_noab_1285	distal_noab_high	0.444	0.207	1.29	0	0.768	0.578	0.572	0	0	0	2.107	1.428	1.648
Chr1L	65102192	65102693	L_dist_noab_1286	distal_noab_high	0.333	0	0.143	0	0.128	0.145	0.381	0	0	0	1.505	0.857	0.659
Chr1L	65763435	65763936	L_dist_noab_1287	distal_noab_high	0.776	0.414	0.573	0.343	0.64	0.289	1.526	4.053	0	0	1.204	1.142	1.977
Chr1L	65928568	65929069	L_dist_hi_1288	distal_high_conf	0.665	5.174	6.881	3.776	1.921	3.902	5.721	0	7.882	0	7.825	5.426	5.602
Chr1L	65930037	65930538	L_dist_hi_1289	distal_high_conf	0.554	2.276	6.021	1.716	1.281	2.746	4.005	4.053	3.941	0	3.912	3.141	3.954
Chr1L	65935602	65936103	L_prox_hi_1290	proximal_high_conf	0.222	2.483	2.437	2.059	0.64	1.734	1.335	0	1.97	0	3.01	1.999	2.636
Chr1L	65936582	65937083	L_dist_hi_1291	distal_high_conf	0.333	2.069	2.724	2.403	1.281	4.335	4.005	8.106	5.911	0	3.912	4.569	2.636
Chr1L	66240341	66240842	L_dist_lo_1292	distal_low_conf	0.665	2.897	2.58	0.343	0.64	2.601	4.196	0	0	0	1.806	1.142	2.307
Chr1L	66419041	66419542	L_dist_lo_1293	distal_low_conf	0.444	1.449	1.29	1.373	0.512	1.59	0	0	0	0	0.903	1.714	0.33
Chr1L	66529414	66529915	L_dist_noab_1294	distal_noab_high	0.776	0.828	0.43	0.686	0.384	0.867	0.954	0	0	0	0.602	1.142	1.648
Chr1L	66834790	66835291	L_dist_noab_1295	distal_noab_high	0.222	0.207	0.573	0	0.128	0.289	0.191	0	1.97	0	1.505	2.285	2.307
Chr1L	66943752	66944253	L_dist_noab_1296	distal_noab_high	0.887	1.035	2.007	0.686	0.897	0.867	0.954	8.106	1.97	0	3.311	1.999	1.977
Chr1L	66946236	66946737	L_dist_hi_1297	distal_high_conf	0.333	1.242	2.294	1.03	0.897	1.445	1.144	8.106	0	0	2.408	1.999	1.648
Chr1L	66947734	66948235	L_dist_noab_1298	distal_noab_high	0.998	2.483	2.15	1.716	1.281	1.445	0.954	0	7.882	0	3.311	5.997	4.943
Chr1L	66948537	66949038	L_prox_lo_1299	proximal_low_conf	0.665	2.483	3.297	2.403	1.409	0.867	0.572	0	1.97	0	2.408	0.286	1.318
Chr1L	66949294	66949795	L_prox_hi_1300	proximal_high_conf	0.554	1.656	3.44	6.178	1.409	1.156	2.861	12.158	11.823	0	6.621	7.425	6.591
Chr1L	66950273	66950774	L_prox_hi_1301	proximal_high_conf	0.887	1.449	2.724	2.403	1.921	1.879	0.763	0	3.941	0	3.01	2.285	2.636
Chr1L	67072304	67072805	L_dist_noab_1302	distal_noab_high	0.222	0.621	0.43	0	0.897	0.578	0.572	0	1.97	8.334	2.408	1.428	0.659
Chr1L	67355213	67355714	L_dist_lo_1303	distal_low_conf	0.665	0.828	1.147	3.432	0.256	0.578	1.526	0	0	0	1.806	1.142	0.33
Chr1L	68079784	68080285	L_prox_hi_1304	proximal_high_conf	0.111	5.174	5.591	4.462	1.409	2.746	1.716	0	7.882	0	3.912	5.141	6.261
Chr1L	68080331	68080832	L_prox_lo_1305	proximal_low_conf	0.444	3.725	2.867	1.716	1.153	2.746	1.907	0	1.97	8.334	2.107	4.569	0.989
Chr1L	68150425	68150926	L_dist_lo_1306	distal_low_conf	0.333	0.414	0.86	1.373	0.768	1.734	1.716	0	0	0	1.505	1.714	1.977
Chr1L	68190989	68191490	L_prox_hi_1307	proximal_high_conf	0.111	6.415	4.014	1.716	2.049	2.168	4.196	8.106	3.941	8.334	6.32	6.854	5.602
Chr1L	68191431	68191932	L_prox_hi_1308	proximal_high_conf	0.111	3.932	4.731	1.716	2.177	3.035	4.005	4.053	9.852	0	2.408	4.569	4.614
Chr1L	68227729	68228230	L_prox_hi_1309	proximal_high_conf	0.554	3.104	5.161	3.432	1.281	3.324	6.675	0	5.911	0	2.709	5.141	3.295
Chr1L	68228146	68228647	L_prox_hi_1310	proximal_high_conf	0.444	4.553	3.584	2.403	1.281	2.746	3.242	0	5.911	0	6.019	7.997	5.932
Chr1L	68230630	68231131	L_dist_lo_1311	distal_low_conf	0.222	1.035	0.717	1.373	0.64	1.879	1.144	0	5.911	0	2.408	2.57	1.318
Chr1L	68233891	68234392	L_dist_hi_1312	distal_high_conf	0.333	2.897	1.433	0.686	1.025	1.012	1.526	0	0	0	1.204	2.285	1.318
Chr1L	68239522	68240023	L_dist_noab_1313	distal_noab_high	0.665	1.863	1.433	0.686	1.281	0.723	0.381	0	0	0	0.903	1.428	1.977
Chr1L	68250896	68251397	L_prox_hi_1314	proximal_high_conf	0.444	4.139	2.007	2.746	1.281	1.734	2.289	0	1.97	0	1.505	3.427	3.295
Chr1L	68262588	68263089	L_dist_lo_1315	distal_low_conf	0.554	2.069	1.864	1.03	0.897	0.723	1.526	0	0	0	1.505	0.857	0.989
Chr1L	68264416	68264917	L_dist_noab_1316	distal_noab_high	0.776	1.449	0.717	2.403	0.512	0.289	0.763	0	1.97	0	1.505	2.285	3.295
Chr1L	68293646	68294147	L_prox_hi_1317	proximal_high_conf	0.665	3.104	4.587	4.119	1.793	2.457	4.005	4.053	1.97	0	5.116	2.856	3.625
Chr1L	68294655	68295156	L_prox_hi_1318	proximal_high_conf	0.887	2.897	3.44	3.432	0.64	0.723	2.289	4.053	1.97	0	2.408	1.999	5.602
Chr1L	68849144	68849645	L_dist_noab_1319	distal_noab_high	0.444	0	0.86	1.03	0.384	0.434	0.381	0	0	0	0.602	1.142	1.318
Chr1L	69139385	69139886	L_dist_lo_1320	distal_low_conf	0.333	1.449	1.577	0.686	0.512	0.867	1.716	0	0	0	1.806	0.571	1.648
Chr1L	69152202	69152703	L_prox_lo_1321	proximal_low_conf	0.333	0.621	1.577	1.373	0.897	0.723	1.526	0	0	8.334	2.709	3.713	0.659
Chr1L	69152575	69153076	L_prox_lo_1322	proximal_low_conf	0.444	0.828	1.864	1.373	1.537	0.867	1.716	8.106	1.97	0	2.709	5.712	0.989
Chr1L	69153215	69153716	L_prox_hi_1323	proximal_high_conf	0.111	0.621	3.87	2.059	2.177	0.723	1.907	4.053	3.941	0	6.32	5.712	4.943
Chr1L	69154274	69154775	L_dist_noab_1324	distal_noab_high	1.22	1.656	1.433	0.686	1.793	1.301	1.526	4.053	0	0	1.806	1.714	2.966
Chr1L	69155792	69156293	L_dist_noab_1325	distal_noab_high	0.776	1.035	1.29	1.716	0.384	0.723	0.763	4.053	0	8.334	2.709	1.714	1.318
Chr1L	69285918	69286419	L_prox_hi_1326	proximal_high_conf	0.554	4.553	5.017	3.089	2.049	3.613	4.577	12.158	3.941	0	6.019	5.141	6.261
Chr1L	69286645	69287146	L_prox_lo_1327	proximal_low_conf	0.554	2.069	3.584	2.403	1.281	2.312	4.959	0	1.97	0	3.612	3.713	0.989
Chr1L	69290085	69290586	L_dist_lo_1328	distal_low_conf	0.111	0.828	0.86	0.343	0.897	0.578	1.144	4.053	0	0	0.903	2.57	0.989
Chr1L	69354877	69355378	L_dist_noab_1329	distal_noab_high	0.444	0	0.143	0	0.384	0.723	0	0	1.97	0	1.505	1.428	0.659
Chr1L	69557220	69557721	L_dist_noab_1330	distal_noab_high	0.222	0	0.573	0.686	0.64	0.289	0.381	0	0	0	2.107	0.857	0.33
Chr1L	69660573	69661074	L_prox_noab_1331	proximal_noab_high	0.887	1.035	1.864	1.716	1.153	0.867	2.479	0	0	8.334	2.709	3.998	0.659
Chr1L	69662447	69662948	L_prox_hi_1332	proximal_high_conf	0.333	1.863	1.72	0.343	1.025	3.613	2.861	0	0	0	5.417	6.854	2.966
Chr1L	69663708	69664209	L_prox_hi_1333	proximal_high_conf	0.333	3.932	6.594	3.432	1.665	3.468	3.433	8.106	5.911	0	6.922	5.712	6.261
Chr1L	69664559	69665060	L_prox_hi_1334	proximal_high_conf	0.665	6.415	9.174	2.059	2.049	5.636	7.247	4.053	5.911	8.334	5.417	7.711	4.284
Chr1L	69665664	69666165	L_dist_hi_1335	distal_high_conf	0.998	6.622	10.465	6.178	2.177	5.781	6.866	4.053	5.911	0	5.718	9.996	6.261
Chr1L	69666063	69666564	L_dist_hi_1336	distal_high_conf	0.665	4.76	6.737	4.462	2.049	6.503	7.438	4.053	1.97	0	4.213	7.14	1.977
Chr1L	69762281	69762782	L_dist_lo_1337	distal_low_conf	0.333	0.207	1.29	1.716	0.512	1.156	1.335	0	0	0	1.505	1.714	0
Chr1L	69784279	69784780	L_dist_lo_1338	distal_low_conf	0.776	2.69	3.87	3.089	1.153	1.445	3.242	0	1.97	8.334	1.505	1.428	1.977
Chr1L	69840591	69841092	L_dist_noab_1339	distal_noab_high	1.109	1.035	1.577	0.343	0.512	1.156	2.098	0	1.97	0	3.311	1.714	2.307
Chr1L	69914440	69914941	L_prox_hi_1340	proximal_high_conf	0.776	3.725	4.444	2.746	1.921	1.734	4.768	0	1.97	0	3.612	2.856	2.636
Chr1L	69993273	69993774	L_prox_lo_1341	proximal_low_conf	0.665	1.863	1.72	1.373	1.025	0.145	1.335	0	3.941	0	3.612	1.714	3.295
Chr1L	70135915	70136416	L_prox_noab_1342	proximal_noab_high	0.776	1.449	1.29	0.686	1.409	1.879	1.716	0	0	0	1.505	2.285	1.977
Chr1L	70316910	70317411	L_prox_noab_1343	proximal_noab_high	0.887	2.276	2.294	1.716	0.512	0.723	1.526	0	0	0	3.311	1.428	4.943
Chr1L	70523576	70524077	L_prox_hi_1344	proximal_high_conf	0.444	2.069	1.003	1.03	1.025	1.879	1.716	0	1.97	0	4.815	1.142	3.295
Chr1L	70560958	70561459	L_dist_hi_1345	distal_high_conf	0.111	1.656	1.864	1.03	0.512	1.445	1.335	0	0	0	1.505	3.427	1.318
Chr1L	70561225	70561726	L_dist_lo_1346	distal_low_conf	0.111	2.069	2.007	1.373	0.512	2.168	2.67	0	0	0	1.806	3.713	0.989
Chr1L	70566573	70567074	L_dist_noab_1347	distal_noab_high	0.776	2.276	1.72	0.686	0.64	2.89	4.386	0	0	0	5.417	4.284	1.977
Chr1L	70574240	70574741	L_prox_hi_1348	proximal_high_conf	0.222	7.45	5.304	3.089	2.305	5.781	9.917	0	1.97	0	5.116	5.426	2.636
Chr1L	70574649	70575150	L_prox_hi_1349	proximal_high_conf	0.665	6.002	3.727	3.776	2.177	5.925	8.773	0	5.911	0	2.107	4.284	3.954
Chr1L	70591580	70592081	L_dist_noab_1350	distal_noab_high	0.554	0.828	1.003	0.343	0.512	0.723	0.572	0	0	0	2.709	2.285	1.318
Chr1L	70597620	70598121	L_prox_noab_1351	proximal_noab_high	0.776	0.621	1.003	2.403	0.256	0.867	2.67	0	1.97	0	3.912	1.428	3.295
Chr1L	70657252	70657753	L_prox_lo_1352	proximal_low_conf	0.333	1.449	2.007	0.686	0.897	1.734	2.67	0	1.97	0	3.311	2.57	3.625
Chr1L	70675753	70676254	L_dist_noab_1353	distal_noab_high	0.665	0.828	0.143	0.686	0.384	0.289	0.381	0	0	0	3.01	0.857	0.989
Chr1L	70678093	70678594	L_prox_hi_1354	proximal_high_conf	0.776	2.897	2.58	2.059	1.537	1.879	1.526	4.053	1.97	8.334	5.417	3.427	7.579
Chr1L	70706981	70707482	L_dist_noab_1355	distal_noab_high	0.665	0.828	0.287	0.686	0.512	1.301	1.335	0	0	0	1.806	2.57	0.989
Chr1L	70786721	70787222	L_dist_lo_1356	distal_low_conf	0.333	1.863	2.867	1.373	0.64	2.89	2.098	0	0	0	2.709	1.999	0.33
Chr1L	70792134	70792635	L_prox_hi_1357	proximal_high_conf	0.444	3.932	2.437	4.462	0.768	2.89	3.624	0	5.911	16.667	2.709	3.998	4.943
Chr1L	70816161	70816662	L_dist_lo_1358	distal_low_conf	0.222	0.414	1.003	1.03	0.768	0.289	1.144	0	1.97	0	1.204	1.428	1.318
Chr1L	70917074	70917575	L_prox_lo_1359	proximal_low_conf	0.776	3.104	3.01	3.776	2.049	3.035	4.768	4.053	3.941	0	2.107	1.142	2.636
Chr1L	71014236	71014737	L_prox_noab_1360	proximal_noab_high	0.554	1.035	1.147	0.686	0.512	1.301	1.907	0	3.941	0	3.612	1.714	2.307
Chr1L	71014852	71015353	L_prox_hi_1361	proximal_high_conf	0.333	3.311	4.3	4.119	1.409	3.324	4.577	8.106	3.941	0	3.912	3.713	1.977
Chr1L	71015202	71015703	L_prox_hi_1362	proximal_high_conf	0.333	4.139	4.3	3.089	1.537	2.457	5.912	12.158	1.97	0	3.912	5.141	2.307
Chr1L	71078264	71078765	L_dist_noab_1363	distal_noab_high	0.444	0	0.717	1.03	0.384	0.145	0.381	0	0	0	0.301	2.285	1.318
Chr1L	71419008	71419509	L_prox_hi_1364	proximal_high_conf	0.333	1.449	1.72	2.059	1.921	0.867	0.763	4.053	1.97	0	2.709	2.57	1.977
Chr1L	71468168	71468669	L_dist_hi_1365	distal_high_conf	0.444	2.276	2.15	1.373	1.153	2.746	3.814	0	0	0	1.806	2.285	2.307
Chr1L	71472524	71473025	L_prox_hi_1366	proximal_high_conf	0.554	1.035	1.29	2.059	1.537	1.012	0.572	0	0	0	1.204	3.427	1.318
Chr1L	71472975	71473476	L_prox_hi_1367	proximal_high_conf	0.444	0.828	1.577	2.059	1.793	2.168	1.907	4.053	3.941	0	1.505	1.999	5.273
Chr1L	71584354	71584855	L_prox_noab_1368	proximal_noab_high	1.22	2.897	1.864	2.059	1.793	1.59	2.479	8.106	0	0	2.107	5.141	4.614
Chr1L	71780953	71781454	L_dist_lo_1369	distal_low_conf	0.333	1.656	0.43	1.373	0.384	5.058	7.056	0	1.97	0	1.204	3.141	2.307
Chr1L	71929637	71930138	L_dist_lo_1370	distal_low_conf	0.111	1.242	0.86	1.373	1.025	0.723	0.381	0	3.941	0	2.408	1.714	0.659
Chr1L	72138880	72139381	L_dist_hi_1371	distal_high_conf	0.554	1.449	2.15	2.746	0.897	0.578	1.716	0	3.941	0	2.107	3.998	3.295
Chr1L	72142349	72142850	L_dist_hi_1372	distal_high_conf	0.444	2.069	1.147	3.089	0.768	0.434	1.144	0	1.97	0	1.204	5.426	2.307
Chr1L	72154093	72154594	L_prox_hi_1373	proximal_high_conf	0.333	2.069	2.294	2.403	1.921	1.012	1.907	4.053	3.941	0	4.213	5.712	6.261
Chr1L	72154776	72155277	L_prox_hi_1374	proximal_high_conf	0.444	2.276	1.577	3.776	1.793	1.301	1.144	4.053	1.97	0	3.612	1.999	2.636
Chr1L	72157665	72158166	L_dist_hi_1375	distal_high_conf	0.554	1.863	2.15	2.746	2.049	1.445	1.907	16.211	1.97	0	5.116	4.569	5.273
Chr1L	72158647	72159148	L_dist_lo_1376	distal_low_conf	0.665	2.069	2.007	0.686	1.025	1.156	4.005	4.053	0	0	1.505	2.285	1.977
Chr1L	72161381	72161882	L_dist_hi_1377	distal_high_conf	0.554	2.276	2.15	2.403	0.897	1.734	2.861	0	0	0	2.408	3.427	3.295
Chr1L	72163334	72163835	L_dist_noab_1378	distal_noab_high	0.776	1.242	2.007	1.373	1.281	0.867	0.954	0	1.97	0	2.107	1.999	1.318
Chr1L	72210615	72211116	L_dist_noab_1379	distal_noab_high	0.222	0.828	0.287	0.343	0.128	0.145	0.572	0	0	0	2.408	0.571	0.659
Chr1L	72271781	72272282	L_dist_lo_1380	distal_low_conf	0.665	2.069	3.727	1.03	1.025	1.734	2.098	0	0	0	1.204	2.285	1.318
Chr1L	72272539	72273040	L_dist_noab_1381	distal_noab_high	0.554	1.035	2.007	0.686	0.512	1.879	2.479	0	0	0	2.107	1.714	1.318
Chr1L	72275581	72276082	L_prox_hi_1382	proximal_high_conf	0.776	3.725	4.157	1.716	1.665	1.445	1.716	0	1.97	0	4.815	3.141	3.295
Chr1L	72478479	72478980	L_prox_lo_1383	proximal_low_conf	0.998	2.276	2.867	1.716	1.409	2.023	2.67	8.106	9.852	0	3.01	2.285	2.966
Chr1L	72490727	72491228	L_prox_lo_1384	proximal_low_conf	0.887	2.276	1.72	1.716	1.665	1.879	2.479	12.158	1.97	0	2.709	2.856	4.614
Chr1L	72596106	72596607	L_prox_hi_1385	proximal_high_conf	0.111	2.276	2.15	2.059	1.281	1.879	2.67	12.158	5.911	0	5.116	3.998	2.636
Chr1L	72614687	72615188	L_prox_hi_1386	proximal_high_conf	0.222	2.897	1.147	2.059	1.793	1.445	2.479	0	1.97	0	2.107	1.999	3.295
Chr1L	72657530	72658031	L_prox_hi_1387	proximal_high_conf	0.444	3.311	2.724	3.776	0.897	1.445	3.242	4.053	1.97	8.334	3.01	4.284	2.307
Chr1L	72671232	72671733	L_dist_hi_1388	distal_high_conf	0.554	4.346	2.867	3.776	1.537	4.335	7.438	4.053	0	0	3.912	4.569	2.636
Chr1L	72706030	72706531	L_dist_noab_1389	distal_noab_high	0.776	1.035	1.003	1.03	0.64	0.867	1.526	4.053	0	0	1.806	0.857	2.966
Chr1L	72711853	72712354	L_dist_lo_1390	distal_low_conf	0.444	1.035	1.577	1.373	0.512	1.59	5.149	0	0	0	0.903	1.142	1.648
Chr1L	72776356	72776857	L_dist_noab_1391	distal_noab_high	0.665	1.863	1.147	0	1.281	1.879	2.289	0	0	0	1.806	2.57	2.636
Chr1L	72776669	72777170	L_prox_hi_1392	proximal_high_conf	0.222	2.69	2.007	1.716	1.793	2.312	3.624	0	1.97	0	3.311	1.999	2.636
Chr1L	72777210	72777711	L_prox_hi_1393	proximal_high_conf	0.222	2.483	2.724	2.746	1.409	2.457	2.67	0	1.97	8.334	4.213	2.856	3.295
Chr1L	72777973	72778474	L_prox_noab_1394	proximal_noab_high	0.554	1.242	1.577	0.343	0.897	1.445	2.289	0	1.97	8.334	3.612	3.998	6.92
Chr1L	72792357	72792858	L_dist_noab_1395	distal_noab_high	0.554	0.621	1.147	0	1.793	1.012	1.144	0	1.97	8.334	1.806	1.999	1.648
Chr1L	72882512	72883013	L_dist_lo_1396	distal_low_conf	0.333	1.656	1.577	0.686	0.897	3.468	4.959	0	0	0	2.107	3.427	1.318
Chr1L	72939518	72940019	L_dist_lo_1397	distal_low_conf	0.111	0.414	1.433	0.343	0.256	0.723	0.954	4.053	1.97	0	0.301	1.142	1.977
Chr1L	72960398	72960899	L_dist_lo_1398	distal_low_conf	0.222	0.414	2.437	0.686	1.537	0.723	0.381	0	3.941	0	3.311	1.999	2.966
Chr1L	73351514	73352015	L_dist_noab_1399	distal_noab_high	1.109	2.276	2.15	1.03	1.025	2.023	3.624	0	1.97	0	3.612	2.285	2.966
Chr1L	73375483	73375984	L_prox_hi_1400	proximal_high_conf	0.333	1.656	1.72	2.059	1.025	0.434	1.716	0	1.97	0	3.01	5.141	1.977
Chr1L	73376105	73376606	L_prox_lo_1401	proximal_low_conf	0.111	1.449	2.867	1.716	1.665	0.578	1.907	0	1.97	0	3.01	0.286	2.966
Chr1L	73377996	73378497	L_dist_noab_1402	distal_noab_high	0.222	0.414	0	0	0.768	0.867	0.954	0	1.97	0	2.107	1.142	1.648
Chr1L	73587343	73587844	L_dist_noab_1403	distal_noab_high	0.222	0.207	0.143	0.686	0.128	0.289	0.191	4.053	0	0	0	1.714	0.989
Chr1L	73700116	73700617	L_dist_noab_1404	distal_noab_high	0.665	1.035	1.147	1.373	0.64	1.445	1.716	0	0	0	1.806	2.285	0
Chr1L	74353736	74354237	L_prox_noab_1405	proximal_noab_high	0.444	0.828	1.864	0	0.512	1.012	1.526	4.053	0	0	2.408	1.999	1.318
Chr1L	74462646	74463147	L_prox_hi_1406	proximal_high_conf	0.333	2.276	3.44	2.059	1.537	2.89	4.768	4.053	0	8.334	5.116	5.712	4.284
Chr1L	74693672	74694173	L_prox_lo_1407	proximal_low_conf	0.222	2.276	0.86	1.03	0.64	1.445	0.381	0	0	0	2.709	2.57	3.954
Chr1L	74733995	74734496	L_dist_noab_1408	distal_noab_high	0.554	1.449	1.003	1.03	0.64	0.867	1.144	0	0	16.667	1.204	1.999	1.318
Chr1L	74741153	74741654	L_dist_lo_1409	distal_low_conf	0.222	1.035	0.573	1.03	0.768	0.434	0.572	0	5.911	0	1.806	0.857	2.636
Chr1L	74861894	74862395	L_dist_hi_1410	distal_high_conf	0.554	4.346	7.311	3.432	0.897	3.035	3.433	0	0	0	1.204	1.714	1.648
Chr1L	74863056	74863557	L_dist_lo_1411	distal_low_conf	0.333	3.311	5.734	3.776	0.897	2.168	3.242	0	0	0	0.903	1.428	2.636
Chr1L	74896720	74897221	L_prox_hi_1412	proximal_high_conf	0.665	1.449	2.437	1.716	1.153	3.324	3.242	8.106	0	0	4.815	4.855	5.932
Chr1L	74897408	74897909	L_prox_hi_1413	proximal_high_conf	0.333	1.656	2.437	2.059	1.281	1.734	1.907	0	0	0	2.107	1.714	3.954
Chr1L	74900426	74900927	L_dist_lo_1414	distal_low_conf	0.222	1.035	1.433	0.343	0.768	1.734	2.479	0	0	0	3.01	1.714	2.966
Chr1L	75006161	75006662	L_prox_hi_1415	proximal_high_conf	0.444	2.897	2.007	1.373	1.281	4.913	10.299	0	1.97	8.334	2.709	1.999	3.625
Chr1L	75006566	75007067	L_prox_hi_1416	proximal_high_conf	0.444	3.725	2.294	1.03	1.281	3.035	5.721	4.053	9.852	0	1.505	3.141	3.625
Chr1L	75146603	75147104	L_dist_noab_1417	distal_noab_high	0.444	1.656	1.147	0	0.768	1.012	0.954	4.053	1.97	0	2.107	2.285	0.659
Chr1L	75235624	75236125	L_prox_noab_1418	proximal_noab_high	0.665	0.414	1.147	1.03	0.512	1.012	1.716	0	5.911	0	1.204	2.285	0.659
Chr1L	75236489	75236990	L_prox_noab_1419	proximal_noab_high	0.887	0.828	1.147	2.403	1.281	0.723	1.907	0	1.97	0	1.505	1.714	2.307
Chr1L	75559823	75560324	L_prox_hi_1420	proximal_high_conf	0.554	2.897	3.154	2.746	2.946	2.457	4.196	0	1.97	0	3.01	3.427	2.636
Chr1L	75644203	75644704	L_prox_hi_1421	proximal_high_conf	0.444	2.276	2.437	2.403	2.69	1.445	1.907	0	7.882	0	3.612	5.712	8.568
Chr1L	75707577	75708078	L_dist_lo_1422	distal_low_conf	0.333	0.621	0.86	1.03	0.64	0.723	0.572	0	0	8.334	1.204	1.714	0.33
Chr1L	75810498	75810999	L_prox_noab_1423	proximal_noab_high	0.998	3.104	2.007	1.03	1.025	0.867	1.907	0	5.911	0	1.505	2.856	3.625
Chr1L	75999149	75999650	L_dist_noab_1424	distal_noab_high	0.887	0.621	0.717	0	1.025	0.434	0.381	0	1.97	0	1.505	1.714	0.989
Chr1L	76008212	76008713	L_dist_hi_1425	distal_high_conf	0.444	2.069	4.874	3.089	1.793	0.434	1.716	4.053	3.941	0	2.709	3.998	1.318
Chr1L	76008437	76008938	L_dist_hi_1426	distal_high_conf	0.444	3.104	4.444	3.089	1.537	0.578	1.526	0	1.97	0	2.709	3.713	1.318
Chr1L	76008733	76009234	L_dist_hi_1427	distal_high_conf	0.665	2.483	4.014	2.403	1.153	0.867	1.335	4.053	0	0	2.709	3.141	1.648
Chr1L	76014280	76014781	L_prox_hi_1428	proximal_high_conf	0.776	4.553	5.447	4.119	2.049	1.879	4.577	4.053	0	0	7.223	4.855	2.636
Chr1L	76015203	76015704	L_prox_lo_1429	proximal_low_conf	0.444	2.69	2.724	1.716	1.153	1.445	1.526	0	3.941	0	2.408	2.285	0.989
Chr1L	76502508	76503009	L_prox_noab_1430	proximal_noab_high	0.776	1.242	1.577	1.03	1.281	0.867	0.572	0	0	0	3.01	1.999	2.307
Chr1L	76505886	76506387	L_prox_hi_1431	proximal_high_conf	0.111	1.863	3.01	1.03	0.768	0.867	1.144	0	1.97	0	2.107	4.284	3.295
Chr1L	76594504	76595005	L_dist_noab_1432	distal_noab_high	0.665	0.828	1.433	1.373	0.384	1.301	0.191	0	0	0	2.408	0.571	0.659
Chr1L	76651733	76652234	L_dist_noab_1433	distal_noab_high	0.444	0.414	1.003	1.03	0.64	0.145	0.381	0	1.97	0	0.903	1.428	0.989
Chr1L	76901479	76901980	L_dist_noab_1434	distal_noab_high	1.109	1.449	0.86	2.403	0.256	1.59	3.051	4.053	0	8.334	0.903	1.714	1.318
Chr1L	76918746	76919247	L_prox_hi_1435	proximal_high_conf	0.444	3.932	2.724	2.059	2.305	3.035	2.67	4.053	1.97	0	4.514	5.712	5.602
Chr1L	77573122	77573623	L_dist_noab_1436	distal_noab_high	0.554	1.035	1.29	1.03	1.153	2.457	1.907	0	1.97	0	3.912	2.285	4.614
Chr1L	77605693	77606194	L_dist_noab_1437	distal_noab_high	0.444	0.207	0.86	0.343	0.256	0.434	0.954	0	3.941	0	2.408	3.141	0.989
Chr1L	77811532	77812033	L_prox_hi_1438	proximal_high_conf	0.222	4.967	4.874	3.432	2.433	2.457	3.624	0	1.97	0	2.107	2.285	2.966
Chr1L	77922679	77923180	L_prox_noab_1439	proximal_noab_high	0.776	1.656	2.294	0.686	1.409	1.301	2.67	0	1.97	0	2.709	2.285	3.295
Chr1L	78010273	78010774	L_dist_noab_1440	distal_noab_high	0.554	0.621	0.573	0	0.512	0.723	0.763	0	5.911	0	3.311	1.999	0
Chr1L	78029411	78029912	L_prox_hi_1441	proximal_high_conf	0.444	4.139	1.577	2.403	1.921	1.156	1.144	8.106	7.882	0	3.612	4.284	3.295
Chr1L	78029816	78030317	L_prox_lo_1442	proximal_low_conf	0.444	2.069	1.433	1.716	1.793	0.723	1.144	0	0	0	1.204	1.714	0.989
Chr1L	78036026	78036527	L_prox_lo_1443	proximal_low_conf	0.998	2.897	4.444	1.373	1.281	2.746	3.051	4.053	3.941	0	2.709	5.141	5.932
Chr1L	78036729	78037230	L_prox_hi_1444	proximal_high_conf	0	3.932	4.3	1.373	1.025	2.89	5.531	0	1.97	8.334	3.912	5.426	7.579
Chr1L	78037134	78037635	L_prox_hi_1445	proximal_high_conf	0.333	4.346	6.021	3.432	1.409	4.624	8.964	0	0	0	3.01	1.428	3.625
Chr1L	78037495	78037996	L_prox_hi_1446	proximal_high_conf	0.776	4.967	6.594	5.492	2.177	3.902	6.103	0	3.941	0	2.709	3.713	4.614
Chr1L	78037799	78038300	L_prox_lo_1447	proximal_low_conf	1.331	3.311	4.3	4.119	2.049	1.734	3.814	0	5.911	0	2.709	4.855	5.602
Chr1L	78042786	78043287	L_dist_noab_1448	distal_noab_high	0.554	0.207	0.573	0	1.153	0.867	0	0	1.97	0	1.505	2.285	0.989
Chr1L	78057908	78058409	L_prox_hi_1449	proximal_high_conf	0.333	2.897	4.3	2.059	1.409	1.445	2.289	4.053	1.97	0	4.514	3.141	1.648
Chr1L	78120212	78120713	L_dist_lo_1450	distal_low_conf	0.333	2.897	3.584	2.403	1.153	2.023	3.051	4.053	1.97	0	0.602	2.285	2.307
Chr1L	78174529	78175030	L_prox_hi_1451	proximal_high_conf	0.444	2.897	2.867	1.03	2.049	1.301	1.335	0	1.97	0	2.709	2.856	1.648
Chr1L	78174870	78175371	L_prox_hi_1452	proximal_high_conf	0.111	2.483	3.01	1.373	1.665	1.156	1.335	0	1.97	0	3.01	1.999	2.636
Chr1L	78225300	78225801	L_prox_lo_1453	proximal_low_conf	0.665	1.863	3.584	0	1.025	1.012	2.098	0	1.97	0	4.213	0.571	0.659
Chr1L	78226692	78227193	L_dist_lo_1454	distal_low_conf	0.776	2.069	4.014	2.403	1.409	2.746	3.814	4.053	3.941	8.334	1.505	5.141	2.636
Chr1L	78276795	78277296	L_prox_hi_1455	proximal_high_conf	0.333	1.656	1.433	3.776	1.281	0.867	1.716	0	3.941	0	4.815	2.57	3.954
Chr1L	78286607	78287108	L_dist_lo_1456	distal_low_conf	0.444	1.035	1.72	0.686	0.768	0.867	0.763	0	0	8.334	1.806	1.999	0.659
Chr1L	78341242	78341743	L_dist_noab_1457	distal_noab_high	0.776	0.414	0.43	1.03	0.64	0.434	0.954	0	0	8.334	0.903	1.142	1.648
Chr1L	78616688	78617189	L_prox_hi_1458	proximal_high_conf	0.333	2.897	1.433	2.746	1.153	1.012	1.144	4.053	5.911	8.334	3.612	2.57	3.954
Chr1L	78628815	78629316	L_dist_noab_1459	distal_noab_high	0.444	0	0.573	1.03	0.897	0.867	0.381	0	0	8.334	0.602	1.714	1.318
Chr1L	78683721	78684222	L_dist_lo_1460	distal_low_conf	0.333	1.035	0.86	1.03	0.512	0.867	0.954	4.053	0	8.334	0.301	1.142	1.977
Chr1L	78755859	78756360	L_dist_lo_1461	distal_low_conf	0.444	0.621	1.147	2.059	0.64	0.867	0.572	0	1.97	0	1.806	2.57	1.648
Chr1L	78756090	78756591	L_dist_lo_1462	distal_low_conf	0.444	0.414	1.147	2.059	0.768	0.289	0.763	0	1.97	0	2.408	2.57	0.989
Chr1L	78802191	78802692	L_dist_lo_1463	distal_low_conf	0.222	1.242	1.147	0.343	0.897	0.723	1.335	0	0	0	0	1.142	2.966
Chr1L	78941106	78941607	L_prox_hi_1464	proximal_high_conf	0.444	4.553	8.171	1.716	1.281	2.746	3.242	0	0	16.667	6.019	2.285	3.625
Chr1L	78941798	78942299	L_prox_lo_1465	proximal_low_conf	0.665	4.553	6.307	0.343	1.281	3.324	7.247	8.106	3.941	0	2.107	3.998	1.977
Chr1L	78945892	78946393	L_dist_noab_1466	distal_noab_high	0.222	0.414	0.573	0.343	0.64	0.289	0.572	0	0	0	0.301	1.999	1.648
Chr1L	78976282	78976783	L_dist_hi_1467	distal_high_conf	0.665	2.69	1.577	2.059	1.409	1.012	1.144	0	0	0	1.505	1.999	2.636
Chr1L	78977545	78978046	L_prox_hi_1468	proximal_high_conf	0.554	3.725	4.444	1.716	1.281	3.757	3.433	12.158	5.911	0	4.815	3.427	3.625
Chr1L	79060932	79061433	L_dist_lo_1469	distal_low_conf	0.222	1.242	0.573	0	1.281	0.434	1.335	0	0	0	2.709	1.999	1.648
Chr1L	79062994	79063495	L_prox_hi_1470	proximal_high_conf	0.665	2.69	2.724	2.059	1.921	1.445	0.954	0	5.911	8.334	4.213	3.141	2.636
Chr1L	79063779	79064280	L_prox_hi_1471	proximal_high_conf	0.665	4.967	3.297	2.746	2.305	1.59	1.716	0	1.97	0	3.01	2.57	2.307
Chr1L	79436294	79436795	L_prox_hi_1472	proximal_high_conf	0.444	1.242	1.864	0.686	1.281	0.723	1.144	0	3.941	0	2.408	3.427	3.954
Chr1L	79484489	79484990	L_prox_hi_1473	proximal_high_conf	0.444	3.725	3.297	3.089	1.665	1.301	1.716	12.158	5.911	0	3.311	4.284	7.25
Chr1L	79513002	79513503	L_prox_hi_1474	proximal_high_conf	0	2.069	2.867	3.089	1.793	1.734	2.479	0	0	0	3.311	3.713	3.954
Chr1L	79513584	79514085	L_prox_hi_1475	proximal_high_conf	0.554	4.76	5.877	4.119	2.562	4.191	7.629	8.106	5.911	0	4.213	5.997	3.295
Chr1L	79597943	79598444	L_prox_hi_1476	proximal_high_conf	0.554	1.449	2.15	1.373	0.897	1.012	1.526	4.053	3.941	0	2.107	1.999	4.284
Chr1L	79692885	79693386	L_prox_hi_1477	proximal_high_conf	0.333	1.656	2.294	3.089	2.946	1.012	0.954	0	5.911	0	5.718	3.713	8.239
Chr1L	79703545	79704046	L_dist_noab_1478	distal_noab_high	0.444	0.828	0.143	1.373	0.512	1.012	0.572	0	3.941	0	1.204	1.999	0.659
Chr1L	80554211	80554712	L_prox_noab_1479	proximal_noab_high	0.665	1.242	1.29	1.373	1.153	1.156	1.335	8.106	3.941	8.334	1.806	1.999	2.307
Chr1L	81072655	81073156	L_prox_lo_1480	proximal_low_conf	0.554	1.656	2.007	2.403	1.537	0.578	1.335	0	0	0	1.806	1.428	0.989
Chr1L	81586078	81586579	L_dist_lo_1481	distal_low_conf	0.333	1.035	0.573	0.686	0.897	0.289	0.572	0	0	0	2.107	1.999	1.318
Chr1L	81594738	81595239	L_prox_noab_1482	proximal_noab_high	0.333	0.621	0.287	0	0.64	1.156	1.335	0	1.97	0	1.505	1.428	0.659
Chr1L	81686944	81687445	L_prox_hi_1483	proximal_high_conf	0.444	3.104	2.294	1.373	1.153	1.734	2.861	8.106	1.97	0	3.01	3.141	4.284
Chr1L	81852314	81852815	L_dist_hi_1484	distal_high_conf	0.444	1.035	1.577	2.746	1.153	0.723	1.716	0	1.97	0	3.01	2.57	1.648
Chr1L	81858066	81858567	L_prox_hi_1485	proximal_high_conf	0.222	1.656	3.297	2.403	1.153	1.879	1.335	4.053	5.911	0	1.505	3.998	3.295
Chr1L	81858413	81858914	L_prox_hi_1486	proximal_high_conf	0.333	1.863	2.867	2.059	0.64	1.156	0.954	0	5.911	8.334	2.709	3.427	3.954
Chr1L	81858857	81859358	L_prox_hi_1487	proximal_high_conf	0.444	3.725	2.867	1.716	0.768	1.301	1.335	4.053	7.882	0	5.116	7.14	8.568
Chr1L	81859628	81860129	L_prox_hi_1488	proximal_high_conf	0.444	1.449	1.147	2.059	1.281	0.867	1.716	8.106	1.97	0	1.806	1.999	1.648
Chr1L	81861016	81861517	L_dist_noab_1489	distal_noab_high	0.665	0.621	0.287	1.373	0.384	0.578	0.572	0	0	0	1.806	1.714	0.33
Chr1L	81864189	81864690	L_dist_noab_1490	distal_noab_high	0.444	1.035	0.86	1.03	0.768	0.434	0.191	4.053	1.97	0	5.718	3.713	3.295
Chr1L	82162095	82162596	L_dist_noab_1491	distal_noab_high	0.554	1.242	0.573	0.343	0.897	1.59	1.144	0	0	0	1.505	2.285	2.636
Chr1L	82494135	82494636	L_prox_hi_1492	proximal_high_conf	0.111	1.242	1.29	1.03	2.433	0.578	0.763	0	0	0	3.01	1.714	2.307
Chr1L	82671975	82672476	L_dist_lo_1493	distal_low_conf	0.222	0.414	0.717	1.03	0.512	0.723	0.572	0	0	0	1.204	0.857	0.659
Chr1L	83364520	83365021	L_prox_hi_1494	proximal_high_conf	0.222	1.656	2.007	1.03	1.153	1.156	0.763	4.053	0	0	1.204	1.714	3.295
Chr1L	83525051	83525552	L_dist_noab_1495	distal_noab_high	0.554	0.828	0.43	1.716	1.025	1.012	2.289	0	0	0	1.806	0.857	0.659
Chr1L	83532690	83533191	L_dist_noab_1496	distal_noab_high	0.665	1.035	0.573	0.686	0.512	0.434	0.954	4.053	0	0	2.107	1.714	1.977
Chr1L	83863905	83864406	L_prox_hi_1497	proximal_high_conf	0.222	4.553	5.447	5.492	1.921	1.59	0.763	8.106	1.97	0	3.612	3.141	7.579
Chr1L	83947032	83947533	L_dist_hi_1498	distal_high_conf	0.333	3.104	4.731	1.03	1.921	1.734	1.907	4.053	3.941	0	4.514	5.141	5.602
Chr1L	83949152	83949653	L_dist_lo_1499	distal_low_conf	0.665	2.069	3.44	1.373	0.897	2.312	2.098	0	0	0	3.01	1.428	0.989
Chr1L	84006376	84006877	L_prox_noab_1500	proximal_noab_high	0.665	1.656	1.003	0.686	0.768	1.445	2.67	4.053	5.911	0	1.204	3.998	3.295
Chr1L	84037577	84038078	L_prox_hi_1501	proximal_high_conf	0.776	3.932	4.874	1.716	1.537	3.035	3.051	0	5.911	0	5.417	4.569	5.273
Chr1L	84264154	84264655	L_prox_hi_1502	proximal_high_conf	0.222	2.069	2.867	2.059	2.049	2.023	1.907	0	3.941	0	5.116	5.141	4.284
Chr1L	84339637	84340138	L_prox_hi_1503	proximal_high_conf	0.444	1.449	2.58	1.373	1.537	1.156	0.763	0	0	0	3.311	1.999	1.977
Chr1L	84424799	84425300	L_prox_lo_1504	proximal_low_conf	0.887	2.897	1.433	2.403	1.665	1.59	1.907	0	5.911	0	2.107	3.141	3.295
Chr1L	84484749	84485250	L_prox_hi_1505	proximal_high_conf	0.444	1.449	3.154	1.373	1.153	1.156	1.526	4.053	1.97	0	2.408	2.856	2.636
Chr1L	84485221	84485722	L_prox_hi_1506	proximal_high_conf	0.333	2.069	1.864	2.746	1.025	2.457	2.098	4.053	0	0	2.709	2.285	2.966
Chr1L	84499687	84500188	L_dist_noab_1507	distal_noab_high	0.444	0.621	0.43	0.686	0.512	0.867	1.907	0	0	0	1.806	2.856	1.648
Chr1L	84731360	84731861	L_prox_hi_1508	proximal_high_conf	0.444	3.311	3.44	2.403	1.537	1.734	3.051	0	1.97	0	3.01	2.57	2.307
Chr1L	84747407	84747908	L_prox_hi_1509	proximal_high_conf	0.444	2.69	2.58	1.716	1.793	2.457	2.098	12.158	3.941	8.334	3.311	6.283	6.261
Chr1L	84748049	84748550	L_prox_lo_1510	proximal_low_conf	0.333	3.104	1.29	1.373	1.537	1.879	2.289	0	0	0	1.204	1.142	0.989
Chr1L	84854710	84855211	L_prox_lo_1511	proximal_low_conf	0.554	2.483	3.297	1.373	2.433	2.89	3.814	8.106	1.97	8.334	3.01	1.142	2.966
Chr1L	84984552	84985053	L_prox_lo_1512	proximal_low_conf	0.887	3.725	2.15	1.03	1.153	1.156	1.907	4.053	1.97	0	3.01	3.998	1.977
Chr1L	85171626	85172127	L_dist_lo_1513	distal_low_conf	0	0.414	0.143	1.716	0.384	0.289	0.381	0	1.97	0	1.204	2.285	1.977
Chr1L	85249458	85249959	L_dist_noab_1514	distal_noab_high	0.665	0.621	0.287	0.343	0.64	1.012	0.954	0	0	0	2.408	0.286	0.659
Chr1L	85373269	85373770	L_dist_lo_1515	distal_low_conf	0.776	4.553	5.304	1.03	1.153	1.445	2.861	4.053	1.97	0	1.806	1.999	1.977
Chr1L	85548313	85548814	L_dist_lo_1516	distal_low_conf	0.776	2.483	2.437	3.432	0.512	2.601	2.861	4.053	1.97	0	1.505	1.428	2.307
Chr1L	85566336	85566837	L_prox_hi_1517	proximal_high_conf	0.665	3.725	3.584	3.089	1.793	2.023	3.051	4.053	3.941	0	4.815	3.998	4.614
Chr1L	85566795	85567296	L_prox_hi_1518	proximal_high_conf	0.333	1.863	3.584	2.403	1.281	2.601	4.005	4.053	3.941	0	3.612	5.141	4.943
Chr1L	85611829	85612330	L_dist_noab_1519	distal_noab_high	0.444	1.035	0.43	0.343	1.537	0.145	0.572	0	0	0	0.602	1.714	0.989
Chr1L	85646279	85646780	L_dist_hi_1520	distal_high_conf	0.222	1.242	0.43	1.03	1.153	1.734	1.907	0	0	0	1.806	1.428	2.636
Chr1L	85651326	85651827	L_prox_hi_1521	proximal_high_conf	0.665	1.863	2.007	2.746	0.768	1.156	2.479	4.053	1.97	0	3.612	1.999	1.977
Chr1L	85651621	85652122	L_prox_hi_1522	proximal_high_conf	0.444	2.276	2.007	2.403	1.153	1.301	2.861	4.053	0	0	3.912	1.714	4.284
Chr1L	85655084	85655585	L_dist_noab_1523	distal_noab_high	0.554	1.035	0.86	0.686	1.281	1.012	0	0	0	0	1.505	0.286	1.648
Chr1L	85761617	85762118	L_prox_hi_1524	proximal_high_conf	0.665	1.242	1.864	2.059	1.409	0.723	1.144	0	3.941	0	2.408	3.998	3.954
Chr1L	85773852	85774353	L_dist_noab_1525	distal_noab_high	0.444	0.414	0.43	0.686	0.64	1.012	0.572	0	0	0	1.806	1.714	0.989
Chr1L	85817519	85818020	L_dist_lo_1526	distal_low_conf	0.222	0.414	1.29	0.343	0.768	1.879	2.289	0	1.97	0	1.204	2.57	0.659
Chr1L	85899764	85900265	L_dist_lo_1527	distal_low_conf	0.222	0.828	0.86	0.343	0.64	0.867	0	0	0	0	1.806	1.142	2.307
Chr1L	85904034	85904535	L_dist_noab_1528	distal_noab_high	0.554	0.414	0.287	0.343	0.512	0.867	0.763	0	0	0	2.408	1.714	0.989
Chr1L	86674828	86675329	L_prox_hi_1529	proximal_high_conf	0.554	0.828	1.29	1.373	1.665	0.723	1.335	0	1.97	0	2.709	2.856	1.977
Chr1L	86807947	86808448	L_dist_lo_1530	distal_low_conf	0.111	0.207	0.43	0.343	0.384	0.289	0.954	0	0	0	2.107	2.57	2.307
Chr1L	86816559	86817060	L_dist_noab_1531	distal_noab_high	0.554	0.621	0.86	1.716	0.897	0.289	1.144	0	0	0	0.602	0.571	2.636
Chr1L	86868143	86868644	L_prox_hi_1532	proximal_high_conf	0.554	2.69	2.007	2.403	1.409	1.879	2.67	0	7.882	0	4.213	2.57	5.273
Chr1L	86899040	86899541	L_prox_hi_1533	proximal_high_conf	0.111	4.76	2.724	2.059	2.177	1.734	3.624	8.106	0	0	4.213	3.141	2.307
Chr1L	87005027	87005528	L_prox_noab_1534	proximal_noab_high	0.887	0.621	1.29	1.03	1.409	2.457	2.479	4.053	7.882	0	3.01	4.284	2.966
Chr1L	87005352	87005853	L_prox_lo_1535	proximal_low_conf	0.665	1.656	2.437	1.373	1.281	2.89	2.67	8.106	11.823	0	2.709	3.141	1.648
Chr1L	87005856	87006357	L_prox_hi_1536	proximal_high_conf	0.554	1.863	3.44	2.403	1.921	2.312	2.67	0	3.941	0	1.204	3.427	1.648
Chr1L	87100076	87100577	L_dist_noab_1537	distal_noab_high	0.665	0.414	0.573	0.343	0.384	0.434	0.381	0	0	0	2.408	1.999	0.659
Chr1L	87210786	87211287	L_prox_noab_1538	proximal_noab_high	0.444	0.414	1.433	0.686	0.64	1.301	1.335	0	0	0	2.408	1.142	1.977
Chr1L	87309831	87310332	L_prox_hi_1539	proximal_high_conf	0.333	3.104	2.15	2.746	1.665	3.179	3.051	0	1.97	8.334	5.718	2.285	2.636
Chr1L	87343394	87343895	L_prox_hi_1540	proximal_high_conf	0.776	4.76	4.157	2.746	1.153	1.59	2.479	0	3.941	0	3.311	3.998	4.943
Chr1L	87427216	87427717	L_dist_hi_1541	distal_high_conf	0.222	1.449	3.154	1.373	1.921	1.156	0.954	4.053	0	0	1.505	1.428	1.977
Chr1L	87625959	87626460	L_prox_lo_1542	proximal_low_conf	0.665	1.863	4.444	4.462	0.64	3.324	3.624	0	1.97	0	1.806	1.142	3.295
Chr1L	87626561	87627062	L_prox_hi_1543	proximal_high_conf	0.887	3.932	4.874	3.776	1.025	3.035	4.386	0	3.941	0	2.709	3.141	3.625
Chr1L	87648013	87648514	L_dist_lo_1544	distal_low_conf	0	0.207	0.287	0.343	0.768	0.289	0.763	0	0	0	2.107	1.142	0.659
Chr1L	87652528	87653029	L_dist_noab_1545	distal_noab_high	0.111	0	0.287	0	0.256	0.578	0.191	0	0	0	1.806	1.428	1.318
Chr1L	87734672	87735173	L_prox_noab_1546	proximal_noab_high	0.444	1.035	0.86	0.343	1.153	1.156	1.526	0	0	0	3.01	1.428	0.659
Chr1L	87735638	87736139	L_prox_lo_1547	proximal_low_conf	0.554	1.035	1.147	1.716	1.153	1.734	1.526	0	3.941	0	5.116	3.713	3.295
Chr1L	87930008	87930509	L_dist_lo_1548	distal_low_conf	0.333	0.828	1.433	0.343	0.64	0.289	2.67	0	0	0	0.602	1.714	1.977
Chr1L	87976334	87976835	L_dist_noab_1549	distal_noab_high	0.444	0.207	0.43	1.03	0.128	1.012	0.381	0	1.97	0	0.602	1.999	1.318
Chr1L	88011577	88012078	L_prox_hi_1550	proximal_high_conf	0.333	3.932	1.577	1.03	1.793	1.012	3.051	0	0	0	2.408	3.427	2.636
Chr1L	88068262	88068763	L_dist_noab_1551	distal_noab_high	0.554	0.414	1.003	0.686	0.384	1.734	0.954	0	3.941	0	2.709	1.142	1.648
Chr1L	88071292	88071793	L_prox_lo_1552	proximal_low_conf	1.109	2.69	2.724	2.059	1.665	2.312	2.289	4.053	1.97	0	1.806	2.57	4.943
Chr1L	88367593	88368094	L_dist_noab_1553	distal_noab_high	0.444	0.207	0.43	0.343	0.256	0.578	0	4.053	0	0	2.107	1.714	2.966
Chr1L	88534142	88534643	L_dist_lo_1554	distal_low_conf	0.998	2.69	5.304	1.716	0.512	4.046	4.386	0	1.97	8.334	2.408	3.141	1.977
Chr1L	88536952	88537453	L_prox_hi_1555	proximal_high_conf	0.665	7.243	5.161	4.805	2.177	4.335	6.294	0	0	0	3.01	1.714	2.966
Chr1L	88824837	88825338	L_prox_noab_1556	proximal_noab_high	0.776	1.242	1.433	1.373	1.153	1.59	0.763	0	1.97	0	2.408	1.714	2.636
Chr1L	88902299	88902800	L_prox_lo_1557	proximal_low_conf	0.776	1.242	3.727	1.03	0.768	1.734	2.098	0	1.97	0	0.301	1.428	2.966
Chr1L	88944798	88945299	L_prox_hi_1558	proximal_high_conf	0.776	2.69	2.437	2.403	0.64	1.156	1.907	4.053	3.941	0	2.709	3.141	2.966
Chr1L	89015170	89015671	L_dist_lo_1559	distal_low_conf	0.998	2.897	4.014	3.089	1.281	3.179	6.484	4.053	1.97	0	1.204	3.141	2.636
Chr1L	89017792	89018293	L_dist_lo_1560	distal_low_conf	0.554	3.104	5.304	0.343	0.64	3.179	4.005	4.053	1.97	0	2.408	0.857	2.966
Chr1L	89028621	89029122	L_prox_hi_1561	proximal_high_conf	0.554	1.656	3.584	1.373	0.64	1.156	1.716	4.053	0	0	2.408	2.57	1.318
Chr1L	89277931	89278432	L_dist_noab_1562	distal_noab_high	0.333	0	0.143	0.343	0.768	0.434	0.572	0	0	0	1.505	1.428	1.318
Chr1L	89617006	89617507	L_dist_lo_1563	distal_low_conf	0.222	0.207	0	1.716	1.153	0.434	0	0	0	0	1.806	1.142	0.989
Chr1L	89660119	89660620	L_prox_hi_1564	proximal_high_conf	0.554	3.104	3.154	2.746	1.665	0.578	0.763	8.106	1.97	0	2.408	3.141	2.636
Chr1L	89725703	89726204	L_dist_noab_1565	distal_noab_high	0.665	0.414	1.29	0	0.897	0.289	0.191	0	1.97	0	0.903	1.142	1.648
Chr1L	90150193	90150694	L_prox_hi_1566	proximal_high_conf	0.333	3.104	4.3	3.089	1.409	4.769	4.768	0	1.97	0	1.505	1.999	1.977
Chr1L	90388623	90389124	L_dist_lo_1567	distal_low_conf	0.222	0.207	0.573	0.686	0.512	0.867	0.191	0	0	0	1.505	1.142	1.977
Chr1L	90393774	90394275	L_prox_hi_1568	proximal_high_conf	0.333	2.069	3.01	1.716	1.409	1.879	3.051	0	1.97	0	1.204	1.428	3.625
Chr1L	90628627	90629128	L_prox_hi_1569	proximal_high_conf	0.554	2.069	2.294	3.432	0.768	2.168	3.242	0	0	0	2.408	2.856	2.636
Chr1L	90728840	90729341	L_dist_lo_1570	distal_low_conf	0.222	2.276	0.287	0.343	0.256	0	1.716	0	0	0	0.602	0.571	3.295
Chr1L	90730749	90731250	L_dist_noab_1571	distal_noab_high	0.665	1.449	1.147	0.686	0.512	1.301	4.386	4.053	1.97	0	1.505	1.714	2.636
Chr1L	90741970	90742471	L_prox_hi_1572	proximal_high_conf	0.444	3.725	9.174	4.119	2.562	5.636	8.392	0	3.941	16.667	4.213	4.855	7.909
Chr1L	90742442	90742943	L_prox_hi_1573	proximal_high_conf	0.554	4.76	6.881	2.746	0.897	4.913	8.201	0	1.97	0	4.514	2.285	1.977
Chr1L	90747680	90748181	L_dist_noab_1574	distal_noab_high	0.776	0.207	0.86	0.686	0.128	1.156	1.716	0	5.911	0	2.408	2.285	2.636
Chr1L	90823621	90824122	L_dist_noab_1575	distal_noab_high	0.444	1.035	0.43	0.686	0.384	0.434	0.763	0	0	0	1.806	1.714	1.318
Chr1L	90974303	90974804	L_prox_hi_1576	proximal_high_conf	0.444	5.588	5.161	4.119	1.281	4.624	7.056	0	1.97	0	3.01	4.569	2.966
Chr1L	91013610	91014111	L_dist_noab_1577	distal_noab_high	0.554	0.414	1.147	0.686	1.025	0.867	1.144	0	1.97	0	1.204	1.714	1.318
Chr1L	91032204	91032705	L_prox_lo_1578	proximal_low_conf	0.111	5.381	4.444	3.089	1.409	3.902	8.01	0	1.97	0	1.505	3.998	0.989
Chr1L	91109030	91109531	L_dist_noab_1579	distal_noab_high	0.665	0.828	1.29	1.03	0.512	1.445	0.763	0	0	0	1.806	1.714	1.318
Chr1L	91110402	91110903	L_dist_hi_1580	distal_high_conf	0.444	1.242	1.003	1.03	0.897	1.301	1.526	0	1.97	0	1.204	1.142	1.318
Chr1L	91214730	91215231	L_prox_hi_1581	proximal_high_conf	0.554	4.76	2.294	3.089	1.793	1.012	2.67	12.158	0	0	2.408	3.141	2.966
Chr1L	91379252	91379753	L_dist_noab_1582	distal_noab_high	0.998	2.69	1.003	1.03	0.64	2.312	2.098	0	0	0	2.408	2.285	0.989
Chr1L	92206409	92206910	L_dist_hi_1583	distal_high_conf	0.554	4.967	5.591	3.776	1.665	6.503	11.443	4.053	0	0	6.32	8.282	3.295
Chr1L	92209185	92209686	L_dist_lo_1584	distal_low_conf	0.333	0.414	2.724	3.089	0.897	2.168	3.433	0	0	0	1.505	0.857	0.33
Chr1L	92212125	92212626	L_dist_lo_1585	distal_low_conf	0.333	2.897	3.727	2.059	0.897	2.457	2.67	0	1.97	8.334	2.408	1.999	0.989
Chr1L	92215464	92215965	L_dist_hi_1586	distal_high_conf	0.554	3.725	4.587	2.403	0.64	3.324	4.768	4.053	1.97	0	4.213	3.427	2.636
Chr1L	92230609	92231110	L_dist_lo_1587	distal_low_conf	0.333	1.449	1.433	1.03	1.025	1.301	1.144	0	0	0	2.107	3.427	0.659
Chr1L	92668594	92669095	L_prox_lo_1588	proximal_low_conf	0.444	1.035	1.433	2.403	0.384	0.723	1.144	0	0	0	1.806	0.857	1.648
Chr1L	92762561	92763062	L_dist_noab_1589	distal_noab_high	0.444	0.414	0.717	0	0.512	0.434	0.381	0	1.97	0	3.311	1.714	0.33
Chr1L	92786926	92787427	L_dist_lo_1590	distal_low_conf	0.887	2.276	4.157	1.373	1.409	1.012	1.335	0	1.97	0	3.311	3.141	2.966
Chr1L	92823160	92823661	L_dist_noab_1591	distal_noab_high	0.998	0.414	1.577	0.343	0.384	1.734	1.716	4.053	0	0	1.806	0.857	1.648
Chr1L	92830782	92831283	L_dist_hi_1592	distal_high_conf	0.665	3.518	4.587	1.03	2.177	2.312	3.242	0	1.97	0	3.311	2.57	2.307
Chr1L	93144649	93145150	L_dist_lo_1593	distal_low_conf	0.222	0.414	0.43	0.686	0.897	1.445	0.763	0	0	0	2.408	0.857	0.33
Chr1L	93153083	93153584	L_dist_hi_1594	distal_high_conf	0.444	1.863	2.867	2.403	1.153	2.601	4.959	0	1.97	0	3.311	3.141	2.636
Chr1L	93153281	93153782	L_dist_hi_1595	distal_high_conf	0.665	2.069	3.01	1.716	1.025	2.312	4.577	0	1.97	0	3.311	2.285	2.307
Chr1L	93180660	93181161	L_dist_noab_1596	distal_noab_high	0.554	1.035	0.287	0.343	0.384	0	0.191	0	1.97	0	2.107	1.142	0.989
Chr1L	93921676	93922177	L_dist_noab_1597	distal_noab_high	0.222	0.207	0.573	0.343	0.128	0.434	0.763	0	0	0	1.806	2.285	0.659
Chr1L	93972787	93973288	L_dist_noab_1598	distal_noab_high	0.444	0.207	0.573	1.03	0.384	0.723	0.954	0	5.911	0	1.505	1.714	0.989
Chr1L	94252420	94252921	L_dist_noab_1599	distal_noab_high	0.665	1.242	0.717	1.373	0.768	0.434	0.954	0	5.911	0	1.806	1.142	0
Chr1L	94418839	94419340	L_dist_noab_1600	distal_noab_high	0.887	0.621	0.573	1.03	0.897	0.723	1.335	8.106	0	0	3.01	1.714	2.636
Chr1L	94662180	94662681	L_dist_lo_1601	distal_low_conf	0.222	0.621	0.573	1.03	0.256	1.012	0.191	0	1.97	0	2.107	1.999	1.318
Chr1L	94789564	94790065	L_dist_noab_1602	distal_noab_high	0.776	1.242	2.867	1.373	0.64	2.746	5.912	0	0	0	2.107	1.999	2.966
Chr1L	95101511	95102012	L_dist_hi_1603	distal_high_conf	0.333	1.656	2.437	1.03	0.384	1.445	3.242	0	0	8.334	3.311	2.285	2.307
Chr1L	95236500	95237001	L_dist_hi_1604	distal_high_conf	0.111	2.69	5.734	1.373	1.281	2.746	7.438	4.053	3.941	0	2.709	1.999	3.295
Chr1L	95296635	95297136	L_dist_lo_1605	distal_low_conf	0.333	1.035	0.717	1.03	0.128	0.434	0.572	0	0	0	0.602	1.142	1.648
Chr1L	95406901	95407402	L_dist_lo_1606	distal_low_conf	0.333	1.656	1.29	1.03	1.921	0.867	1.526	0	3.941	8.334	1.505	0.857	2.636
Chr1L	95521722	95522223	L_prox_hi_1607	proximal_high_conf	0.333	0.621	1.147	1.03	1.281	1.59	1.526	0	0	0	2.408	1.714	1.977
Chr1L	95522584	95523085	L_prox_noab_1608	proximal_noab_high	0.887	1.863	2.15	1.716	1.153	2.457	1.716	0	1.97	0	1.505	3.713	3.295
Chr1L	95685521	95686022	L_prox_lo_1609	proximal_low_conf	0.887	4.139	6.881	2.403	1.665	2.746	3.433	0	0	0	1.204	1.999	1.977
Chr1L	95833611	95834112	L_dist_noab_1610	distal_noab_high	0.444	0.414	0.717	0.343	0.897	0.434	0.381	0	1.97	0	1.204	1.714	1.318
Chr1L	96105634	96106135	L_dist_lo_1611	distal_low_conf	0.333	1.242	1.433	0.686	0.897	1.734	2.289	4.053	0	0	2.107	0.857	0.33
Chr1L	96133579	96134080	L_dist_noab_1612	distal_noab_high	0.444	0	0.573	1.03	0.897	0.578	0.763	0	0	0	1.204	1.714	2.307
Chr1L	96269702	96270203	L_prox_lo_1613	proximal_low_conf	0	1.035	1.433	0.343	0.256	2.457	4.196	0	1.97	0	2.408	2.57	2.307
Chr1L	96274904	96275405	L_dist_noab_1614	distal_noab_high	0.444	1.035	0.573	0	0.384	2.312	2.861	4.053	0	0	1.505	2.57	2.966
Chr1L	96275262	96275763	L_dist_noab_1615	distal_noab_high	0.444	0.207	1.433	0.686	0.384	4.191	3.624	8.106	0	0	1.806	2.57	2.966
Chr1L	96276293	96276794	L_dist_noab_1616	distal_noab_high	0.333	0.621	0.717	0.686	0.384	2.168	2.67	0	3.941	0	1.505	1.714	0.989
Chr1L	96787346	96787847	L_dist_noab_1617	distal_noab_high	0.444	0	0.43	0.343	0.768	0.578	0.191	0	0	0	0.903	1.142	0.33
Chr1L	97141895	97142396	L_prox_hi_1618	proximal_high_conf	0.554	1.242	2.007	0.686	1.409	1.301	3.433	4.053	5.911	0	3.01	4.284	2.636
Chr1L	97144489	97144990	L_dist_noab_1619	distal_noab_high	0.444	0.621	0.43	0.343	0.384	0.289	0.191	0	1.97	0	1.505	0	1.648
Chr1L	97357991	97358492	L_dist_lo_1620	distal_low_conf	0	0	0.43	0.343	0.128	0.723	0.381	0	0	0	1.505	0.857	0.659
Chr1L	98106106	98106607	L_dist_noab_1621	distal_noab_high	0.333	0.207	0.287	0.343	0.256	1.301	0.763	0	0	0	1.505	3.713	1.318
Chr1L	98173515	98174016	L_dist_noab_1622	distal_noab_high	0.444	0.621	0.143	1.373	0.512	0.867	0.191	0	0	0	2.107	0.857	2.307
Chr1L	98312889	98313390	L_dist_lo_1623	distal_low_conf	0.222	0.621	0.86	0.343	0.64	0.867	1.335	0	0	0	1.204	0.857	0.33
Chr1L	98313348	98313849	L_dist_lo_1624	distal_low_conf	0.333	0.414	0.86	1.03	0.64	0.867	1.144	0	0	0	4.514	1.714	0.989
Chr1L	98313767	98314268	L_dist_noab_1625	distal_noab_high	0.333	0.621	0.287	1.03	0.384	1.445	1.144	4.053	0	0	3.311	3.998	1.318
Chr1L	98314491	98314992	L_dist_lo_1626	distal_low_conf	0.444	0.207	1.003	1.716	1.281	1.879	0.381	0	0	8.334	5.417	5.426	0
Chr1L	98334685	98335186	L_dist_noab_1627	distal_noab_high	0.444	0.207	1.72	0	0.64	0.723	0.381	0	0	0	1.505	1.428	1.318
Chr1L	98433907	98434408	L_dist_noab_1628	distal_noab_high	0.444	0.621	0.43	0	0.768	0.289	0.763	0	0	0	2.107	1.142	0.659
Chr1L	98627922	98628423	L_dist_noab_1629	distal_noab_high	0.665	0.828	0.86	1.373	0.384	1.012	0.381	0	1.97	0	2.408	1.428	2.307
Chr1L	98698177	98698678	L_dist_lo_1630	distal_low_conf	0	0	0.287	0	0.512	0.289	0.381	4.053	1.97	0	1.505	1.428	1.648
Chr1L	98713415	98713916	L_dist_lo_1631	distal_low_conf	0.222	1.656	2.437	2.403	0.897	0.723	1.335	0	0	8.334	0.301	3.141	0.659
Chr1L	98978637	98979138	L_dist_noab_1632	distal_noab_high	1.663	0.828	2.58	2.059	2.946	2.601	1.526	0	9.852	0	4.213	2.57	1.648
Chr1L	99034347	99034848	L_prox_hi_1633	proximal_high_conf	0.554	2.69	4.157	3.089	1.793	3.613	3.624	0	1.97	0	4.213	1.714	3.954
Chr1L	99034870	99035371	L_prox_hi_1634	proximal_high_conf	0.554	2.69	6.737	3.432	1.025	6.07	8.773	4.053	3.941	0	4.815	2.856	1.648
Chr1L	99036796	99037297	L_dist_lo_1635	distal_low_conf	0.776	3.311	2.294	0.343	0.768	4.335	5.531	0	3.941	0	0.903	3.998	2.636
Chr1L	99051897	99052398	L_dist_noab_1636	distal_noab_high	0.554	0	0.573	0.343	1.025	0.867	0.763	0	1.97	0	0.903	3.141	0.659
Chr1L	99110585	99111086	L_dist_noab_1637	distal_noab_high	0.665	0.414	0.573	0	1.409	0.578	0.954	0	0	0	3.612	1.714	0.989
Chr1L	99158814	99159315	L_dist_lo_1638	distal_low_conf	0.111	0.828	3.44	3.089	1.153	0.723	0.763	0	0	0	1.806	0.857	1.318
Chr1L	99547457	99547958	L_dist_lo_1639	distal_low_conf	0.333	0.621	2.437	1.373	0.897	2.023	2.67	8.106	5.911	0	1.806	2.285	0.659
Chr1L	99685657	99686158	L_dist_hi_1640	distal_high_conf	0.444	1.035	3.44	1.716	0.256	0.723	0.763	0	1.97	0	2.107	2.285	1.648
Chr1L	99706773	99707274	L_dist_noab_1641	distal_noab_high	0.887	1.863	1.72	1.373	1.025	1.734	4.005	0	0	0	6.32	3.427	1.318
Chr1L	99707159	99707660	L_dist_lo_1642	distal_low_conf	0.554	3.311	2.294	1.716	1.025	2.168	3.242	0	0	0	9.33	6.569	0.989
Chr1L	99790226	99790727	L_dist_noab_1643	distal_noab_high	0.998	0.207	0.573	1.03	0.64	0.723	0.572	0	0	8.334	2.408	0.857	0.989
Chr1L	99835096	99835597	L_dist_noab_1644	distal_noab_high	0.444	0	0.86	0	0.384	0.434	0.572	8.106	0	0	1.806	1.714	1.648
Chr1L	99896866	99897367	L_dist_noab_1645	distal_noab_high	0.333	0.828	0.86	0.343	0.64	1.445	0.191	0	3.941	0	1.806	0.571	0.33
Chr1L	100144110	100144611	L_prox_hi_1646	proximal_high_conf	0.444	0.828	2.294	1.716	1.025	1.301	1.144	0	1.97	0	1.204	1.999	1.648
Chr1L	100144600	100145101	L_prox_lo_1647	proximal_low_conf	1.109	3.104	5.447	2.746	1.281	2.457	3.814	8.106	1.97	0	1.806	2.856	1.318
Chr1L	100296261	100296762	L_prox_hi_1648	proximal_high_conf	0.776	2.483	4.3	1.03	2.305	1.59	2.67	4.053	0	0	4.213	2.856	2.307
Chr1L	100308835	100309336	L_dist_noab_1649	distal_noab_high	0.444	0.621	1.003	1.373	0.256	0.723	0.572	0	3.941	0	2.107	0.571	1.648
Chr1L	100476886	100477387	L_prox_hi_1650	proximal_high_conf	0.444	2.69	3.154	2.059	0.64	2.457	4.386	8.106	3.941	0	1.505	1.428	2.307
Chr1L	100515820	100516321	L_prox_hi_1651	proximal_high_conf	0.998	5.795	3.44	4.119	1.793	3.757	4.577	0	7.882	0	3.612	2.856	2.966
Chr1L	100573578	100574079	L_prox_lo_1652	proximal_low_conf	0.222	2.897	3.154	1.373	1.281	1.156	2.861	4.053	1.97	0	0.903	2.856	0.659
Chr1L	100688402	100688903	L_dist_noab_1653	distal_noab_high	0.222	0.414	0.143	0.343	0.768	0.434	0.381	0	0	0	1.505	0.571	1.977
Chr1L	100802929	100803430	L_prox_lo_1654	proximal_low_conf	0.554	2.483	2.294	2.403	1.409	1.59	1.335	0	0	0	0.301	0.857	2.966
Chr1L	100875306	100875807	L_prox_hi_1655	proximal_high_conf	0.222	3.932	3.297	2.059	1.281	2.601	4.577	0	0	0	4.213	1.999	4.614
Chr1L	100877270	100877771	L_dist_noab_1656	distal_noab_high	0.665	1.035	1.147	1.373	1.409	1.879	1.716	0	1.97	0	3.01	0.571	2.307
Chr1L	100894137	100894638	L_prox_hi_1657	proximal_high_conf	0.333	1.656	0.717	1.373	1.281	0.578	0.954	0	0	16.667	1.806	3.713	1.977
Chr1L	100976186	100976687	L_prox_noab_1658	proximal_noab_high	0.887	1.449	2.724	2.059	1.025	2.168	1.335	0	3.941	8.334	4.213	1.999	1.318
Chr1L	101176845	101177346	L_prox_hi_1659	proximal_high_conf	0.554	1.242	2.294	2.403	1.281	0.867	2.289	4.053	0	0	1.806	1.999	2.966
Chr1L	101236758	101237259	L_prox_noab_1660	proximal_noab_high	0.665	1.035	1.433	0.343	1.025	1.156	1.335	0	3.941	0	1.806	0.857	1.318
Chr1L	101273166	101273667	L_dist_noab_1661	distal_noab_high	0.665	1.863	1.147	1.373	0.768	4.335	6.103	0	0	0	3.311	1.714	0.989
Chr1L	101418349	101418850	L_dist_noab_1662	distal_noab_high	0.222	0.207	0.43	0.686	0.128	0.434	0.191	0	0	0	3.01	1.714	1.648
Chr1L	101418916	101419417	L_prox_hi_1663	proximal_high_conf	0.111	1.863	2.867	4.805	1.793	1.012	0.954	0	0	0	2.107	2.57	2.636
Chr1L	101419540	101420041	L_prox_hi_1664	proximal_high_conf	0.554	1.863	2.867	3.432	1.793	1.012	0.954	0	3.941	0	3.912	3.427	4.943
Chr1L	101474155	101474656	L_dist_noab_1665	distal_noab_high	0.444	0.414	0.287	0.343	0.64	1.012	0.572	0	0	0	1.204	1.428	2.307
Chr1L	101482142	101482643	L_prox_hi_1666	proximal_high_conf	0.444	1.035	1.864	2.403	0.64	1.445	1.144	12.158	5.911	0	2.408	1.999	1.977
Chr1L	101558185	101558686	L_prox_hi_1667	proximal_high_conf	0.222	3.932	5.161	2.059	1.025	3.613	5.721	4.053	1.97	0	4.514	3.141	4.614
Chr1L	101860869	101861370	L_dist_hi_1668	distal_high_conf	0.444	3.104	3.297	2.403	1.793	2.457	4.196	0	1.97	0	2.107	3.713	1.977
Chr1L	102044344	102044845	L_prox_hi_1669	proximal_high_conf	0.444	2.69	2.437	1.373	0.897	1.445	3.051	0	1.97	0	3.01	3.713	3.625
Chr1L	102646040	102646541	L_prox_lo_1670	proximal_low_conf	0.998	2.483	2.437	3.089	1.281	1.59	3.051	0	3.941	0	1.806	1.714	1.318
Chr1L	102947921	102948422	L_dist_lo_1671	distal_low_conf	0.444	1.035	2.294	0.686	0.64	2.312	4.577	0	0	8.334	0.903	1.142	1.977
Chr1L	102949600	102950101	L_dist_lo_1672	distal_low_conf	1.109	1.863	5.017	3.432	2.69	4.335	6.866	0	1.97	0	4.514	5.997	1.648
Chr1L	102951004	102951505	L_dist_lo_1673	distal_low_conf	1.331	2.276	5.734	4.805	1.153	6.359	10.299	0	0	0	2.107	5.997	1.318
Chr1L	102951910	102952411	L_dist_lo_1674	distal_low_conf	1.442	3.518	4.874	3.089	1.025	5.925	8.392	0	0	0	3.311	8.568	3.295
Chr1L	103056817	103057318	L_dist_lo_1675	distal_low_conf	0.111	0.621	0.573	0.686	0.256	0.289	0.191	0	1.97	0	0.602	1.142	0.659
Chr1L	103075065	103075566	L_dist_noab_1676	distal_noab_high	0.444	1.242	0.573	0	0.768	0.434	0.763	0	3.941	0	1.505	1.142	1.318
Chr1L	103322814	103323315	L_dist_noab_1677	distal_noab_high	0.665	0.414	1.577	1.03	0.768	1.156	1.526	0	0	0	2.107	0.857	1.318
Chr1L	103557161	103557662	L_prox_hi_1678	proximal_high_conf	0.333	1.449	1.003	1.373	0.897	0.867	2.861	4.053	1.97	0	1.204	1.428	1.977
Chr1L	103559151	103559652	L_dist_hi_1679	distal_high_conf	0.887	3.518	4.587	2.746	1.025	4.769	6.675	4.053	0	0	6.019	5.141	4.284
Chr1L	103561076	103561577	L_prox_lo_1680	proximal_low_conf	0.554	2.069	2.15	1.03	2.049	3.902	6.484	0	0	0	1.806	2.57	0.989
Chr1L	104066417	104066918	L_prox_lo_1681	proximal_low_conf	0.444	2.069	2.437	0.686	1.793	1.012	0.954	0	1.97	0	0.903	2.856	1.648
Chr1L	104113027	104113528	L_prox_noab_1682	proximal_noab_high	0.887	2.069	1.003	0.686	0.768	0.578	2.098	0	1.97	0	1.806	1.999	0.659
Chr1L	104135226	104135727	L_prox_lo_1683	proximal_low_conf	0.444	1.863	1.864	1.373	1.921	1.301	1.144	0	0	0	3.612	2.856	0.659
Chr1L	104407555	104408056	L_dist_noab_1684	distal_noab_high	0.776	2.069	1.29	1.03	1.281	1.012	1.144	0	0	0	1.204	2.285	2.966
Chr1L	104508859	104509360	L_dist_noab_1685	distal_noab_high	0.665	0.828	0.717	0.343	1.025	0.434	0.381	0	0	0	1.806	1.428	0.989
Chr1L	104511400	104511901	L_prox_lo_1686	proximal_low_conf	0.554	1.449	1.864	1.716	0.897	1.879	1.716	8.106	3.941	0	0.903	2.856	3.954
Chr1L	105184488	105184989	L_prox_hi_1687	proximal_high_conf	0.665	4.553	4.014	2.746	2.049	2.168	2.861	0	0	0	1.806	4.284	5.602
Chr1L	105696212	105696713	L_dist_noab_1688	distal_noab_high	0.444	0.414	0.287	0	0.384	0.578	1.144	0	0	0	3.311	1.714	0.659
Chr1L	105701270	105701771	L_dist_noab_1689	distal_noab_high	0.444	1.242	0.86	0.686	0.512	2.023	1.526	0	0	0	1.204	2.57	1.977
Chr1L	105705151	105705652	L_dist_lo_1690	distal_low_conf	0.665	2.276	1.72	1.373	0.64	2.457	4.768	0	1.97	0	1.505	2.285	1.318
Chr1L	105796584	105797085	L_dist_lo_1691	distal_low_conf	0.333	0.414	1.147	0.686	0.64	1.012	1.144	0	0	0	1.505	1.142	2.307
Chr1L	105855630	105856131	L_prox_hi_1692	proximal_high_conf	0.444	2.897	2.58	2.403	1.921	1.879	1.907	0	0	0	2.107	1.999	2.636
Chr1L	105856200	105856701	L_prox_hi_1693	proximal_high_conf	0.333	2.069	2.724	1.373	1.409	1.012	2.098	4.053	5.911	8.334	1.806	5.426	5.602
Chr1L	105930765	105931266	L_prox_noab_1694	proximal_noab_high	0.665	1.242	1.433	0.686	1.025	1.445	1.144	0	3.941	0	2.107	4.569	3.295
Chr1L	105982046	105982547	L_prox_hi_1695	proximal_high_conf	0.444	2.69	2.007	3.776	0.897	1.156	0.763	0	1.97	0	2.408	1.714	2.966
Chr1L	106023001	106023502	L_dist_noab_1696	distal_noab_high	0.665	0.828	1.147	1.373	1.665	0.723	0.381	0	0	0	1.204	2.856	0.33
Chr1L	106032224	106032725	L_dist_noab_1697	distal_noab_high	0.222	0.207	0.717	0.343	0.384	0	0.191	0	0	0	2.709	1.714	0
Chr1L	106142810	106143311	L_dist_noab_1698	distal_noab_high	0.554	0.414	0.717	1.03	1.665	1.301	0.381	8.106	0	0	0.602	1.999	0.989
Chr1L	106200024	106200525	L_prox_hi_1699	proximal_high_conf	0.111	2.69	4.874	3.776	1.793	0.578	1.526	4.053	0	8.334	3.01	3.998	3.954
Chr1L	106200472	106200973	L_prox_hi_1700	proximal_high_conf	0.333	3.104	4.3	0.686	1.281	1.156	2.289	4.053	0	0	2.709	4.569	1.648
Chr1L	106438745	106439246	L_prox_hi_1701	proximal_high_conf	0.333	2.483	2.294	3.089	1.665	1.445	1.716	4.053	0	0	2.709	4.855	6.261
Chr1L	106508973	106509474	L_prox_hi_1702	proximal_high_conf	0.444	3.311	1.72	1.373	1.665	1.301	3.051	8.106	3.941	0	4.213	2.57	2.966
Chr1L	106617121	106617622	L_prox_lo_1703	proximal_low_conf	0.665	2.69	3.154	3.089	2.433	0.867	1.335	4.053	7.882	0	0.903	3.141	2.636
Chr1L	106863353	106863854	L_prox_hi_1704	proximal_high_conf	0.554	3.725	2.867	2.746	1.153	1.156	2.67	0	1.97	0	1.505	1.714	2.307
Chr1L	106863764	106864265	L_prox_hi_1705	proximal_high_conf	0.444	3.725	2.58	2.059	1.025	1.734	3.814	0	5.911	0	1.806	2.856	1.648
Chr1L	107068630	107069131	L_dist_lo_1706	distal_low_conf	0.554	1.863	1.72	1.373	1.793	0.578	2.098	0	0	0	0.602	1.999	2.307
Chr1L	107071174	107071675	L_prox_lo_1707	proximal_low_conf	0.665	2.276	1.433	1.373	0.897	0.723	0.763	4.053	7.882	0	2.107	2.57	2.636
Chr1L	107187982	107188483	L_dist_lo_1708	distal_low_conf	0.554	1.656	2.294	1.03	0.768	3.902	4.768	4.053	3.941	0	2.709	1.714	2.636
Chr1L	107255900	107256401	L_dist_noab_1709	distal_noab_high	0.776	1.242	1.147	1.373	0.64	1.445	1.907	0	0	0	1.204	4.284	1.977
Chr1L	107282934	107283435	L_prox_hi_1710	proximal_high_conf	0.333	3.311	2.724	4.119	1.281	1.734	3.051	0	0	8.334	2.408	1.428	4.284
Chr1L	107462443	107462944	L_prox_lo_1711	proximal_low_conf	0.776	4.76	3.727	1.373	2.818	3.757	5.531	0	1.97	16.667	1.204	1.714	3.295
Chr1L	107462836	107463337	L_prox_hi_1712	proximal_high_conf	0.444	3.725	4.444	2.746	3.074	2.457	4.005	4.053	3.941	0	2.408	1.999	2.636
Chr1L	107645029	107645530	L_prox_lo_1713	proximal_low_conf	0.776	2.069	2.007	1.716	1.537	1.879	2.289	0	1.97	8.334	2.107	1.428	2.636
Chr1L	107645589	107646090	L_prox_lo_1714	proximal_low_conf	0.887	1.863	3.01	3.432	1.281	1.445	1.716	16.211	3.941	0	5.116	1.142	2.966
Chr1L	107715916	107716417	L_dist_noab_1715	distal_noab_high	0.665	0.621	0.717	1.03	1.153	0.434	0.572	0	1.97	0	1.505	3.427	2.307
Chr1L	107726713	107727214	L_prox_hi_1716	proximal_high_conf	0.887	3.932	4.157	3.089	2.433	1.734	2.289	12.158	3.941	0	2.709	4.569	4.943
Chr1L	107795179	107795680	L_prox_noab_1717	proximal_noab_high	1.22	2.483	4.014	2.059	1.153	2.168	1.526	12.158	0	0	4.213	3.141	2.966
Chr1L	107795443	107795944	L_prox_lo_1718	proximal_low_conf	0.665	2.897	2.867	1.03	0.897	1.156	1.144	4.053	0	0	4.213	2.285	2.307
Chr1L	107807607	107808108	L_prox_hi_1719	proximal_high_conf	0.222	1.863	2.58	1.373	1.665	1.012	3.051	0	3.941	0	3.01	3.427	6.261
Chr1L	107835185	107835686	L_dist_noab_1720	distal_noab_high	0.554	0.207	0.573	1.716	0.64	0.578	0.763	0	1.97	0	1.505	1.999	0.33
Chr1L	107890464	107890965	L_prox_hi_1721	proximal_high_conf	0.887	3.104	3.727	3.432	1.409	1.156	4.005	0	1.97	0	2.709	1.999	2.636
Chr1L	107917449	107917950	L_dist_lo_1722	distal_low_conf	0.111	0.414	0.717	1.03	0.64	1.156	0.572	0	0	0	1.204	1.714	0.989
Chr1L	107932943	107933444	L_dist_hi_1723	distal_high_conf	0.887	2.897	3.44	2.746	0.897	2.746	4.768	4.053	3.941	0	4.213	6.283	2.307
Chr1L	108009440	108009941	L_dist_noab_1724	distal_noab_high	0.333	0.207	1.147	0	0.897	0.723	0.381	0	0	0	0.903	0.857	2.307
Chr1L	108223741	108224242	L_prox_hi_1725	proximal_high_conf	0.222	1.863	1.577	2.059	1.537	1.59	2.289	4.053	3.941	0	3.612	3.427	1.648
Chr1L	108261238	108261739	L_dist_noab_1726	distal_noab_high	1.885	1.242	1.147	1.03	0.897	1.879	1.716	4.053	7.882	0	5.417	7.997	5.602
Chr1L	108265226	108265727	L_dist_noab_1727	distal_noab_high	1.109	0.828	0.86	0.686	0.512	1.156	0.954	0	0	0	3.612	3.141	2.966
Chr1L	108266149	108266650	L_dist_noab_1728	distal_noab_high	0.998	1.449	0.43	0.686	0.897	0.434	1.526	0	0	0	2.408	4.569	1.318
Chr1L	108298712	108299213	L_prox_noab_1729	proximal_noab_high	0.887	2.069	1.577	1.03	0.897	1.879	1.907	0	0	0	2.709	1.999	4.284
Chr1L	108404633	108405134	L_dist_noab_1730	distal_noab_high	0.887	1.035	1.147	0.686	1.665	0.867	1.144	4.053	17.734	0	8.728	5.712	2.307
Chr1L	108708436	108708937	L_prox_hi_1731	proximal_high_conf	0.554	2.276	4.731	3.776	1.153	2.746	3.433	0	3.941	0	1.505	2.285	2.636
Chr1L	108725733	108726234	L_dist_lo_1732	distal_low_conf	0.554	2.276	3.727	1.373	0.768	2.457	4.196	0	1.97	0	0.602	1.428	3.295
Chr1L	108767442	108767943	L_dist_hi_1733	distal_high_conf	0.554	1.449	1.72	1.373	1.025	1.445	1.907	0	3.941	0	1.505	2.285	2.636
Chr1L	108768717	108769218	L_dist_noab_1734	distal_noab_high	0.444	1.035	1.433	0.343	0.64	1.156	2.098	8.106	0	0	2.709	3.427	2.966
Chr1L	108771081	108771582	L_prox_hi_1735	proximal_high_conf	0.776	5.381	7.024	3.776	1.281	5.492	11.634	4.053	3.941	8.334	2.408	2.57	2.307
Chr1L	108777389	108777890	L_dist_hi_1736	distal_high_conf	0.554	2.483	2.58	1.373	1.153	5.492	9.345	0	0	0	3.01	1.714	1.977
Chr1L	108781417	108781918	L_prox_hi_1737	proximal_high_conf	0.776	2.276	4.014	2.403	0.768	4.046	8.01	0	3.941	0	2.408	2.856	5.273
Chr1L	108813191	108813692	L_dist_noab_1738	distal_noab_high	1.109	1.863	2.15	0.343	1.409	2.457	5.721	0	0	0	3.01	3.713	2.307
Chr1L	108820309	108820810	L_prox_hi_1739	proximal_high_conf	0.444	2.276	4.874	3.432	2.69	3.324	3.433	0	0	0	3.912	3.713	7.579
Chr1L	108826010	108826511	L_dist_hi_1740	distal_high_conf	0.222	4.346	4.444	1.716	1.537	1.734	2.098	4.053	1.97	0	2.408	1.999	3.625
Chr1L	108827154	108827655	L_dist_noab_1741	distal_noab_high	1.331	2.276	4.157	2.403	1.153	2.601	2.098	4.053	1.97	0	2.709	3.998	2.636
Chr1L	108854692	108855193	L_prox_hi_1742	proximal_high_conf	0.333	4.553	3.297	2.059	1.793	2.457	2.098	0	3.941	0	2.107	3.141	2.307
Chr1L	108855937	108856438	L_dist_lo_1743	distal_low_conf	0.444	0.828	2.294	1.03	0.768	1.445	2.479	8.106	0	0	2.107	2.856	2.966
Chr1L	108874597	108875098	L_prox_hi_1744	proximal_high_conf	0.333	3.518	5.161	3.432	1.281	6.503	10.489	0	3.941	0	3.912	3.141	1.977
Chr1L	108874907	108875408	L_prox_hi_1745	proximal_high_conf	0.444	5.795	5.304	2.403	1.921	7.804	8.582	0	3.941	0	3.612	3.141	1.318
Chr1L	108915312	108915813	L_prox_hi_1746	proximal_high_conf	0.444	1.242	1.72	1.03	1.537	0.723	0.954	4.053	1.97	0	3.311	1.999	3.954
Chr1L	108963243	108963744	L_prox_hi_1747	proximal_high_conf	0.222	2.276	5.161	1.716	0.512	3.035	4.196	4.053	1.97	8.334	1.204	3.141	1.648
Chr1L	109038111	109038612	L_dist_lo_1748	distal_low_conf	0.333	1.035	1.003	0.686	0.897	0.723	0.381	0	0	0	2.107	0.571	1.648
Chr1L	109044242	109044743	L_prox_hi_1749	proximal_high_conf	0.665	2.483	2.437	2.403	1.409	1.445	5.34	0	1.97	0	3.01	2.856	1.648
Chr1L	109090023	109090524	L_prox_noab_1750	proximal_noab_high	0.887	2.897	1.72	1.03	1.153	0.867	1.144	0	1.97	0	1.806	2.856	3.295
Chr1L	109090433	109090934	L_prox_hi_1751	proximal_high_conf	0.554	2.897	1.577	0.686	1.281	1.301	1.526	0	3.941	0	1.505	2.285	1.977
Chr1L	109217914	109218415	L_prox_hi_1752	proximal_high_conf	0.444	1.449	2.437	2.403	1.025	0.578	2.098	8.106	5.911	0	1.204	2.57	4.943
Chr1L	109388130	109388631	L_prox_noab_1753	proximal_noab_high	0.998	1.242	1.577	0.686	1.537	1.734	1.526	0	1.97	0	1.204	1.999	1.977
Chr1L	109388562	109389063	L_prox_noab_1754	proximal_noab_high	0.776	1.449	1.433	1.716	1.153	1.445	2.479	0	5.911	0	2.709	3.141	0.989
Chr1L	109692777	109693278	L_dist_lo_1755	distal_low_conf	0.222	1.035	1.433	0.343	0.64	0.578	0.191	0	9.852	0	2.107	2.57	1.318
Chr1L	109694852	109695353	L_dist_lo_1756	distal_low_conf	0.333	1.656	4.731	2.403	0.897	0.578	1.335	0	0	0	2.408	0.571	2.966
Chr1L	109840322	109840823	L_dist_lo_1757	distal_low_conf	0.444	1.656	1.864	1.03	0.897	0.578	0.572	4.053	1.97	0	2.709	1.714	0.659
Chr1L	109859743	109860244	L_dist_lo_1758	distal_low_conf	0.333	0.414	0.43	1.716	0.768	1.012	0.763	0	0	0	3.01	1.142	1.648
Chr1L	109973312	109973813	L_prox_hi_1759	proximal_high_conf	0.111	2.483	3.87	1.373	1.665	2.746	5.912	8.106	1.97	0	3.311	1.999	3.954
Chr1L	109973908	109974409	L_prox_hi_1760	proximal_high_conf	0.444	5.795	5.734	3.089	1.153	3.902	6.103	0	5.911	0	5.116	2.856	3.625
Chr1L	110150088	110150589	L_prox_hi_1761	proximal_high_conf	0.554	2.483	1.29	1.373	1.153	0.867	1.335	4.053	1.97	0	1.204	1.428	2.636
Chr1L	110367942	110368443	L_prox_lo_1762	proximal_low_conf	0.665	4.139	4.014	3.432	1.281	2.457	4.768	8.106	3.941	0	2.408	3.427	1.318
Chr1L	110434368	110434869	L_prox_lo_1763	proximal_low_conf	0.333	0.414	2.58	2.746	1.921	2.168	2.098	0	0	0	1.806	1.999	0.659
Chr1L	110541800	110542301	L_dist_lo_1764	distal_low_conf	0.333	1.242	0.573	0.686	0.768	1.012	1.526	0	0	0	1.806	1.142	1.318
Chr1L	110543339	110543840	L_prox_lo_1765	proximal_low_conf	0.665	3.725	4.587	3.089	0.768	1.734	3.051	8.106	0	0	1.204	3.427	5.273
Chr1L	110544011	110544512	L_prox_hi_1766	proximal_high_conf	0.444	2.276	2.15	2.403	1.153	1.59	1.907	0	3.941	0	2.709	3.427	1.977
Chr1L	110572919	110573420	L_prox_hi_1767	proximal_high_conf	0.333	2.69	2.437	2.403	1.793	0.434	1.716	8.106	3.941	0	1.806	4.284	7.579
Chr1L	110619373	110619874	L_prox_hi_1768	proximal_high_conf	0.222	2.276	4.587	1.373	1.281	2.312	2.289	0	3.941	0	3.01	1.428	2.966
Chr1L	110619704	110620205	L_prox_hi_1769	proximal_high_conf	0.665	2.69	4.3	3.432	1.537	2.023	2.861	4.053	0	0	2.408	1.714	2.966
Chr1L	110810016	110810517	L_dist_lo_1770	distal_low_conf	0.665	1.863	1.433	1.716	0.897	1.156	1.526	4.053	0	0	1.505	0.571	1.648
Chr1L	110856241	110856742	L_prox_hi_1771	proximal_high_conf	0.222	1.863	1.864	2.403	1.409	1.734	3.624	0	0	0	2.408	1.999	1.977
Chr1L	110907495	110907996	L_dist_noab_1772	distal_noab_high	0.444	1.035	0.287	0.343	0.512	0.723	0	0	0	0	1.204	0.857	0.659
Chr1L	110924756	110925257	L_dist_noab_1773	distal_noab_high	0.554	0.621	0.43	0.686	1.409	1.156	1.144	0	0	0	2.408	0.857	2.307
Chr1L	110935381	110935882	L_prox_hi_1774	proximal_high_conf	0.554	3.311	3.87	3.432	1.025	3.613	3.051	4.053	3.941	8.334	2.709	1.714	4.614
Chr1L	111019772	111020273	L_dist_lo_1775	distal_low_conf	0.554	1.242	1.29	1.716	1.153	0.723	2.289	0	0	0	2.107	1.428	0.33
Chr1L	111036418	111036919	L_dist_lo_1776	distal_low_conf	0.333	2.69	3.727	1.373	0.512	2.601	4.959	0	0	0	2.107	1.714	0.989
Chr1L	111037279	111037780	L_dist_lo_1777	distal_low_conf	0.665	3.932	5.304	3.432	0.897	3.468	3.624	8.106	1.97	0	3.311	2.57	0.989
Chr1L	111038073	111038574	L_prox_hi_1778	proximal_high_conf	0.444	6.415	6.881	3.089	2.818	3.179	2.861	12.158	9.852	0	5.417	6.854	8.898
Chr1L	111066210	111066711	L_dist_hi_1779	distal_high_conf	0.665	3.932	3.87	4.462	1.409	4.191	4.386	0	5.911	16.667	2.709	3.427	2.636
Chr1L	111144434	111144935	L_prox_hi_1780	proximal_high_conf	0.444	2.897	2.15	1.716	1.025	2.312	3.433	8.106	0	0	2.408	5.426	2.966
Chr1L	111179792	111180293	L_dist_hi_1781	distal_high_conf	0.444	5.588	4.444	3.089	1.153	4.913	8.201	0	0	0	3.01	4.855	4.284
Chr1L	111181594	111182095	L_dist_hi_1782	distal_high_conf	0.333	5.174	5.161	3.089	1.793	3.613	4.577	0	1.97	0	4.514	2.57	1.977
Chr1L	111181876	111182377	L_dist_hi_1783	distal_high_conf	0.333	3.311	5.304	2.746	1.537	3.468	6.294	0	1.97	8.334	2.107	2.57	1.648
Chr1L	111213725	111214226	L_dist_hi_1784	distal_high_conf	0.333	4.346	4.731	1.373	0.64	4.191	8.964	4.053	1.97	0	1.806	2.57	2.966
Chr1L	111216584	111217085	L_prox_hi_1785	proximal_high_conf	0.444	6.415	5.591	2.403	1.409	3.757	7.438	4.053	1.97	0	3.612	1.999	2.636
Chr1L	111217817	111218318	L_prox_hi_1786	proximal_high_conf	0.554	3.311	6.021	2.059	0.64	2.168	7.438	4.053	1.97	0	1.505	2.57	3.295
Chr1L	111218865	111219366	L_dist_lo_1787	distal_low_conf	0.222	1.035	1.72	0.686	0.768	1.156	3.242	4.053	0	0	2.709	1.714	1.977
Chr1L	111361116	111361617	L_dist_lo_1788	distal_low_conf	0.887	4.139	4.157	1.03	0.768	2.89	6.294	4.053	0	0	3.01	0.857	3.295
Chr1L	111444627	111445128	L_dist_hi_1789	distal_high_conf	0.222	5.795	6.594	3.432	0.897	6.07	7.247	0	0	0	2.709	2.856	3.295
Chr1L	111447043	111447544	L_dist_lo_1790	distal_low_conf	1.109	5.588	6.021	4.805	0.897	6.07	8.01	0	1.97	0	3.01	3.713	1.648
Chr1L	111784030	111784531	L_dist_noab_1791	distal_noab_high	0.665	0.828	1.003	0.343	0.64	1.301	1.144	4.053	1.97	0	1.806	0.571	1.318
Chr1L	111872713	111873214	L_dist_noab_1792	distal_noab_high	0.665	0.621	1.433	0	0.256	0.578	0.763	0	1.97	0	1.806	2.285	1.648
Chr1L	111878959	111879460	L_prox_hi_1793	proximal_high_conf	0.776	2.69	5.304	0.686	2.562	2.601	2.289	8.106	1.97	0	3.01	2.285	4.614
Chr1L	111947418	111947919	L_prox_hi_1794	proximal_high_conf	0.444	3.725	3.87	2.746	1.921	3.179	5.531	0	3.941	0	3.01	2.285	5.932
Chr1L	111995938	111996439	L_dist_noab_1795	distal_noab_high	0.444	1.242	0.43	0.343	1.409	0.434	0.191	0	0	0	1.806	1.428	1.977
Chr1L	112029717	112030218	L_prox_lo_1796	proximal_low_conf	0.998	3.104	4.444	2.746	1.537	2.023	2.289	4.053	1.97	0	1.806	1.999	2.966
Chr1L	112102604	112103105	L_dist_noab_1797	distal_noab_high	0.444	0.828	0.43	0.343	0.897	0.289	0.381	0	1.97	0	1.505	1.428	0.989
Chr1L	112134618	112135119	L_prox_lo_1798	proximal_low_conf	0.776	4.139	5.304	2.403	2.305	3.179	4.196	4.053	1.97	0	2.408	3.427	1.318
Chr1L	112242924	112243425	L_prox_hi_1799	proximal_high_conf	0.111	4.553	5.304	1.373	3.33	5.058	5.721	4.053	5.911	0	4.213	5.141	5.932
Chr1L	112243977	112244478	L_prox_hi_1800	proximal_high_conf	0.776	4.346	4.444	2.059	1.281	5.925	8.773	0	3.941	0	4.514	5.712	3.295
Chr1L	112300962	112301463	L_prox_hi_1801	proximal_high_conf	0.444	4.139	3.44	1.03	1.793	1.734	2.67	0	1.97	8.334	1.204	2.285	2.966
Chr1L	112330816	112331317	L_prox_lo_1802	proximal_low_conf	0.665	1.449	2.007	1.716	0.384	1.012	1.526	0	0	0	2.107	2.856	0.659
Chr1L	112331157	112331658	L_prox_hi_1803	proximal_high_conf	0.776	2.276	2.437	2.403	0.64	1.156	2.289	0	0	0	2.107	2.285	1.977
Chr1L	112344283	112344784	L_dist_lo_1804	distal_low_conf	0.333	2.069	1.29	0	0.384	0.145	0.381	0	0	0	2.408	0.286	0.989
Chr1L	112432872	112433373	L_prox_lo_1805	proximal_low_conf	0.554	2.483	3.584	2.746	1.537	1.879	2.67	0	1.97	0	0.602	2.856	2.307
Chr1L	112433294	112433795	L_prox_hi_1806	proximal_high_conf	0.554	3.104	3.584	3.089	1.921	2.168	2.098	4.053	0	0	3.612	3.141	1.648
Chr1L	112450380	112450881	L_dist_noab_1807	distal_noab_high	0.554	0.207	0.717	0.343	0.64	0.578	0.763	0	0	0	1.204	1.428	1.318
Chr1L	112450737	112451238	L_dist_noab_1808	distal_noab_high	0.333	0.207	0.143	0.686	0.256	0.434	0.572	0	0	0	1.505	1.714	1.318
Chr1L	112687397	112687898	L_dist_lo_1809	distal_low_conf	0.333	0.828	1.433	0.686	0.512	2.312	5.912	4.053	1.97	0	1.806	1.999	2.307
Chr1L	112688444	112688945	L_dist_hi_1810	distal_high_conf	0.444	1.449	2.294	1.373	0.768	4.046	6.294	0	0	16.667	2.408	1.714	1.977
Chr1L	112765894	112766395	L_dist_hi_1811	distal_high_conf	0.444	3.104	2.15	1.373	1.025	3.179	3.624	4.053	1.97	0	2.709	3.427	2.636
Chr1L	112793570	112794071	L_dist_hi_1812	distal_high_conf	0.554	3.104	2.724	2.059	0.512	0.867	2.861	0	0	0	1.505	2.285	1.977
Chr1L	112800628	112801129	L_dist_noab_1813	distal_noab_high	0.665	1.656	0.287	0.343	0.768	0.578	0.954	0	0	0	1.204	1.714	0.659
Chr1L	112832582	112833083	L_dist_noab_1814	distal_noab_high	0.333	0	0.43	1.373	0.512	0.723	1.144	0	0	0	1.806	0.857	0.659
Chr1L	112988054	112988555	L_dist_lo_1815	distal_low_conf	0	0.828	0.717	1.03	1.025	0.723	1.335	0	0	8.334	1.806	1.142	1.648
Chr1L	113231104	113231605	L_dist_noab_1816	distal_noab_high	0.444	0.414	1.577	0.343	0	1.012	2.479	0	0	8.334	2.408	5.712	1.318
Chr1L	113241927	113242428	L_prox_noab_1817	proximal_noab_high	0.554	0.621	2.007	1.03	0.768	1.156	1.526	0	1.97	0	2.709	1.142	2.966
Chr1L	113256107	113256608	L_dist_lo_1818	distal_low_conf	0.665	2.276	2.294	1.03	0.768	0.723	0.954	4.053	0	8.334	2.408	1.142	0.659
Chr1L	113280276	113280777	L_dist_noab_1819	distal_noab_high	0.776	1.449	1.003	1.373	1.281	4.48	5.721	0	0	0	0.602	1.714	2.307
Chr1L	113384611	113385112	L_prox_hi_1820	proximal_high_conf	0.333	0.828	1.147	1.03	1.025	0.867	1.526	0	1.97	0	2.107	3.141	2.307
Chr1L	113434109	113434610	L_prox_lo_1821	proximal_low_conf	0.444	2.069	1.72	1.716	1.409	1.301	1.526	0	0	0	2.107	1.999	0.33
Chr1L	113457034	113457535	L_prox_hi_1822	proximal_high_conf	0.444	2.483	2.724	1.373	1.665	1.879	2.289	0	3.941	0	3.01	2.285	1.648
Chr1L	113537331	113537832	L_prox_hi_1823	proximal_high_conf	0.222	2.483	2.724	3.432	1.025	0.867	0.954	0	3.941	0	3.612	4.569	2.307
Chr1L	113595625	113596126	L_prox_hi_1824	proximal_high_conf	0.444	1.656	2.867	1.716	1.793	3.757	3.242	4.053	0	0	2.709	2.285	3.295
Chr1L	113615075	113615576	L_dist_lo_1825	distal_low_conf	0.776	4.76	3.297	1.716	1.153	2.312	4.005	0	0	0	3.01	1.142	1.648
Chr1L	113774112	113774613	L_prox_hi_1826	proximal_high_conf	0.554	4.139	5.591	4.462	2.177	3.902	6.866	0	3.941	0	3.311	3.141	5.273
Chr1L	113774346	113774847	L_prox_hi_1827	proximal_high_conf	0.554	4.346	7.311	5.835	2.177	4.48	7.819	0	1.97	0	3.612	3.713	5.932
Chr1L	113774990	113775491	L_prox_lo_1828	proximal_low_conf	0.776	3.104	6.594	2.403	2.562	2.746	7.629	4.053	1.97	0	3.01	2.285	0.989
Chr1L	113776187	113776688	L_dist_hi_1829	distal_high_conf	0.444	2.69	2.58	1.03	1.793	2.746	6.103	0	1.97	0	2.107	2.856	2.307
Chr1L	113906164	113906665	L_prox_hi_1830	proximal_high_conf	0.554	2.69	3.01	1.716	1.025	2.023	1.907	4.053	5.911	0	2.408	1.428	3.954
Chr1L	113906675	113907176	L_prox_hi_1831	proximal_high_conf	0.333	0.828	2.58	1.373	1.025	0.867	0.954	4.053	0	0	1.505	1.428	2.307
Chr1L	113961395	113961896	L_prox_lo_1832	proximal_low_conf	0.665	3.311	4.731	3.089	1.281	2.168	2.861	4.053	0	0	2.107	1.142	3.954
Chr1L	114052508	114053009	L_prox_hi_1833	proximal_high_conf	0.665	3.104	3.01	2.403	1.025	3.757	7.438	4.053	3.941	8.334	5.116	2.285	1.648
Chr1L	114052926	114053427	L_prox_lo_1834	proximal_low_conf	0.998	4.139	3.297	1.716	1.025	4.335	5.912	0	1.97	0	3.01	1.714	2.636
Chr1L	114076861	114077362	L_dist_hi_1835	distal_high_conf	0.333	3.104	3.727	1.03	1.281	1.59	1.526	4.053	1.97	0	2.107	2.285	2.966
Chr1L	114084666	114085167	L_prox_hi_1836	proximal_high_conf	0.554	5.588	5.017	2.403	2.69	3.757	3.624	0	1.97	0	3.01	2.285	2.966
Chr1L	114085061	114085562	L_prox_hi_1837	proximal_high_conf	0.333	4.967	6.737	3.776	2.69	5.636	8.392	4.053	5.911	0	2.408	2.856	3.954
Chr1L	114241354	114241855	L_dist_noab_1838	distal_noab_high	0.665	0.414	0.717	0.686	0.384	0.145	0.191	4.053	0	0	0.903	1.999	2.307
Chr1L	114260808	114261309	L_prox_hi_1839	proximal_high_conf	0.111	2.897	3.297	0.686	1.537	2.601	3.624	4.053	1.97	0	1.505	3.141	6.261
Chr1L	114743853	114744354	L_prox_noab_1840	proximal_noab_high	0.665	1.242	1.864	1.373	0.512	0.723	1.526	4.053	1.97	0	0.903	2.57	2.307
Chr1L	114764494	114764995	L_prox_lo_1841	proximal_low_conf	0.998	3.104	2.437	3.089	1.409	2.457	2.098	0	1.97	0	1.806	2.57	2.966
Chr1L	114764860	114765361	L_prox_hi_1842	proximal_high_conf	0.444	2.483	1.864	1.716	1.665	3.468	2.861	0	3.941	0	4.514	2.57	2.966
Chr1L	114778102	114778603	L_dist_hi_1843	distal_high_conf	0.222	1.863	1.864	1.373	1.537	0.867	1.144	0	1.97	0	3.612	3.998	1.977
Chr1L	114799993	114800494	L_prox_hi_1844	proximal_high_conf	0.554	3.518	5.017	3.776	1.665	2.89	3.814	4.053	5.911	0	3.311	4.855	7.579
Chr1L	114801088	114801589	L_prox_hi_1845	proximal_high_conf	0.111	3.104	4.3	3.089	2.946	2.168	3.624	0	5.911	0	4.213	3.713	3.625
Chr1L	114855294	114855795	L_dist_noab_1846	distal_noab_high	0.444	0.414	0.573	1.373	0.64	0.723	0.954	0	0	0	2.107	2.856	0.659
Chr1L	115069479	115069980	L_prox_hi_1847	proximal_high_conf	0.222	2.069	2.294	2.059	1.025	1.301	2.67	4.053	3.941	8.334	3.612	3.141	2.966
Chr1L	115100725	115101226	L_dist_noab_1848	distal_noab_high	0.333	1.035	0.287	0.343	0.897	0.723	0.572	0	1.97	8.334	0.903	2.285	0.989
Chr1L	115120598	115121099	L_prox_hi_1849	proximal_high_conf	0.111	3.104	1.864	2.746	1.025	2.312	2.861	0	0	0	1.505	3.713	1.648
Chr1L	115144306	115144807	L_prox_hi_1850	proximal_high_conf	0.333	2.069	2.437	1.373	1.025	3.757	4.196	0	1.97	0	1.806	3.713	1.977
Chr1L	115144942	115145443	L_prox_lo_1851	proximal_low_conf	0.554	2.69	1.72	1.373	0.64	3.613	6.294	0	1.97	0	3.612	1.999	0.33
Chr1L	115163710	115164211	L_dist_lo_1852	distal_low_conf	0.444	2.276	0.43	1.03	1.281	1.156	3.433	0	3.941	8.334	1.505	1.714	0.33
Chr1L	115165950	115166451	L_dist_lo_1853	distal_low_conf	0.887	2.069	3.727	1.716	1.025	3.324	6.484	0	1.97	0	1.204	3.427	3.295
Chr1L	115166236	115166737	L_dist_lo_1854	distal_low_conf	0.776	2.069	3.01	1.373	0.512	4.046	8.392	0	1.97	0	1.806	3.998	2.307
Chr1L	115169857	115170358	L_dist_lo_1855	distal_low_conf	0.554	2.897	0.86	2.059	0.897	3.035	8.964	0	1.97	0	3.311	2.856	1.318
Chr1L	115171892	115172393	L_dist_lo_1856	distal_low_conf	0.554	1.449	2.437	1.716	0.512	3.902	4.577	0	0	0	2.107	1.142	2.307
Chr1L	115173167	115173668	L_prox_noab_1857	proximal_noab_high	0.776	2.069	1.72	0.343	0.128	2.457	4.386	0	3.941	0	2.107	2.57	0.989
Chr1L	115174184	115174685	L_prox_hi_1858	proximal_high_conf	0.444	4.553	4.3	2.403	1.793	4.191	5.912	0	5.911	0	2.408	2.57	1.648
Chr1L	115174505	115175006	L_prox_lo_1859	proximal_low_conf	0.665	2.276	3.727	3.776	2.69	3.902	6.103	0	5.911	8.334	2.709	2.285	0.659
Chr1L	115178778	115179279	L_dist_hi_1860	distal_high_conf	0.554	0.828	1.29	1.716	1.665	0.723	1.526	0	0	0	3.311	3.998	1.648
Chr1L	115178994	115179495	L_dist_hi_1861	distal_high_conf	0.554	1.242	1.29	1.373	1.153	0.723	1.335	4.053	0	0	2.709	3.141	1.648
Chr1L	115217145	115217646	L_dist_noab_1862	distal_noab_high	0.554	0.414	0.573	0.686	0.64	0.434	0.381	8.106	1.97	0	0.903	2.57	1.648
Chr1L	115290469	115290970	L_prox_lo_1863	proximal_low_conf	0.998	3.518	4.014	2.059	1.153	0.723	0.954	4.053	1.97	0	1.505	3.998	2.966
Chr1L	115290982	115291483	L_prox_noab_1864	proximal_noab_high	0.776	1.656	1.72	2.059	0.64	1.012	0.381	4.053	0	0	0.903	2.856	0.989
Chr1L	115336332	115336833	L_prox_hi_1865	proximal_high_conf	0.333	2.069	4.3	4.462	2.305	2.746	3.624	0	5.911	0	1.806	3.713	1.648
Chr1L	115336671	115337172	L_prox_hi_1866	proximal_high_conf	0.222	1.656	3.297	4.119	1.409	1.445	1.716	0	3.941	0	2.709	1.714	2.966
Chr1L	115700907	115701408	L_prox_hi_1867	proximal_high_conf	0.333	1.449	1.433	2.746	1.281	1.156	1.526	8.106	0	0	1.806	2.285	1.648
Chr1L	115708893	115709394	L_dist_lo_1868	distal_low_conf	0.665	3.932	3.01	3.432	1.025	3.324	6.294	4.053	1.97	0	2.107	0.857	2.636
Chr1L	115946912	115947413	L_prox_hi_1869	proximal_high_conf	0.554	2.897	1.72	3.432	1.281	1.301	1.144	0	0	0	3.311	1.999	3.295
Chr1L	115947463	115947964	L_prox_hi_1870	proximal_high_conf	0.665	1.656	2.007	2.746	1.025	1.156	0.763	4.053	0	0	4.213	5.426	4.943
Chr1L	115948451	115948952	L_dist_noab_1871	distal_noab_high	0.444	0.621	0.86	0	0.768	0.578	0	0	1.97	0	2.408	1.714	0.659
Chr1L	116087836	116088337	L_prox_noab_1872	proximal_noab_high	1.109	2.276	2.007	3.432	1.153	1.879	2.861	0	5.911	0	0.602	1.714	2.966
Chr1L	116088492	116088993	L_prox_hi_1873	proximal_high_conf	0.554	1.863	3.584	1.716	1.409	1.301	1.335	0	1.97	0	4.815	5.426	5.932
Chr1L	116122469	116122970	L_prox_noab_1874	proximal_noab_high	0.887	1.863	1.72	1.716	1.665	1.445	1.716	0	1.97	0	1.204	3.713	0.989
Chr1L	116135319	116135820	L_prox_hi_1875	proximal_high_conf	0.333	1.449	3.297	2.059	1.153	1.734	1.716	0	0	0	2.408	1.714	2.966
Chr1L	116149491	116149992	L_prox_hi_1876	proximal_high_conf	0.333	2.276	2.007	2.059	2.305	1.734	2.67	0	1.97	0	2.408	2.856	1.977
Chr1L	116159717	116160218	L_prox_noab_1877	proximal_noab_high	0.887	2.69	0.717	2.059	1.281	2.023	1.144	0	0	0	1.806	1.714	3.954
Chr1L	116672959	116673460	L_dist_noab_1878	distal_noab_high	0.554	0	0.717	0.686	1.025	1.445	0.381	0	0	0	1.806	1.999	2.636
Chr1L	116910936	116911437	L_prox_hi_1879	proximal_high_conf	0.444	3.932	5.304	0.686	1.537	2.023	1.716	4.053	1.97	0	3.311	3.427	1.977
Chr1L	117016950	117017451	L_prox_lo_1880	proximal_low_conf	0.665	1.863	3.584	0.686	1.281	2.601	3.433	12.158	1.97	8.334	4.514	3.427	2.307
Chr1L	117053931	117054432	L_prox_lo_1881	proximal_low_conf	0.665	4.967	4.731	1.373	1.409	2.023	1.526	8.106	0	0	1.204	2.57	4.943
Chr1L	117192379	117192880	L_dist_noab_1882	distal_noab_high	0.887	1.449	2.15	1.373	1.409	1.879	2.479	0	0	0	2.709	0.571	1.648
Chr1L	117268635	117269136	L_dist_noab_1883	distal_noab_high	0.333	0.621	0.43	1.03	0.384	0.434	1.144	0	0	0	0.903	1.428	1.648
Chr1L	117298199	117298700	L_prox_hi_1884	proximal_high_conf	0.333	1.863	5.447	0.686	1.537	1.59	1.335	0	1.97	0	3.912	2.285	1.318
Chr1L	117298799	117299300	L_prox_lo_1885	proximal_low_conf	0.333	1.656	4.444	0.343	1.281	0.867	0.381	0	0	0	2.107	2.285	0.659
Chr1L	117299360	117299861	L_dist_hi_1886	distal_high_conf	0.222	2.483	3.87	0.686	1.921	0.867	0.763	0	1.97	0	3.612	2.57	2.966
Chr1L	117299877	117300378	L_dist_hi_1887	distal_high_conf	0	2.897	6.594	2.403	1.153	1.445	2.098	4.053	1.97	0	3.912	2.856	5.932
Chr1L	117300448	117300949	L_dist_hi_1888	distal_high_conf	0.444	2.69	5.734	1.716	1.409	1.734	3.814	4.053	0	0	2.107	1.428	1.977
Chr1L	117350501	117351002	L_dist_noab_1889	distal_noab_high	0.554	0.828	0.43	0.686	1.281	1.445	0.954	0	3.941	0	1.204	2.285	0
Chr1L	117365452	117365953	L_dist_noab_1890	distal_noab_high	0.554	0.621	0.86	0	1.025	0.867	1.716	4.053	1.97	0	1.806	1.999	1.648
Chr1L	117417669	117418170	L_prox_lo_1891	proximal_low_conf	0.554	1.449	2.724	0.686	1.153	0.723	1.335	4.053	3.941	0	2.408	0.857	1.318
Chr1L	117490880	117491381	L_dist_hi_1892	distal_high_conf	0.333	4.139	6.164	2.059	0.897	1.301	2.289	4.053	0	0	2.107	2.856	2.307
Chr1L	117492983	117493484	L_dist_lo_1893	distal_low_conf	0.554	4.553	3.297	0.343	1.921	1.445	1.335	0	3.941	0	1.505	1.714	0.659
Chr1L	117536313	117536814	L_prox_hi_1894	proximal_high_conf	0.333	2.69	2.294	1.716	1.281	3.035	5.721	0	0	0	2.107	2.57	1.977
Chr1L	117536622	117537123	L_prox_hi_1895	proximal_high_conf	0.222	2.69	2.007	2.403	1.665	2.168	5.149	0	1.97	0	2.709	2.57	2.636
Chr1L	117559203	117559704	L_dist_lo_1896	distal_low_conf	0.222	0.207	1.147	1.716	0.768	1.59	2.098	0	0	0	0.903	1.714	2.636
Chr1L	117651135	117651636	L_prox_hi_1897	proximal_high_conf	0.665	3.311	2.007	2.059	1.537	2.89	4.959	0	1.97	8.334	1.806	3.427	1.977
Chr1L	117672286	117672787	L_dist_hi_1898	distal_high_conf	0.554	1.242	2.15	1.716	0.512	2.023	3.242	0	0	0	1.806	2.285	1.648
Chr1L	117715675	117716176	L_prox_hi_1899	proximal_high_conf	0.222	2.69	4.444	1.716	1.665	3.179	3.242	16.211	1.97	0	5.718	7.14	7.579
Chr1L	117734049	117734550	L_dist_lo_1900	distal_low_conf	0.111	0.207	0.143	1.03	0.384	0.578	0	0	0	0	1.505	0	0.989
Chr1L	117768489	117768990	L_dist_lo_1901	distal_low_conf	0.554	2.483	1.147	0.343	0.897	1.445	2.098	0	0	0	1.204	1.428	0.659
Chr1L	117986000	117986501	L_prox_hi_1902	proximal_high_conf	0.776	1.863	2.867	2.059	1.281	2.601	3.814	4.053	0	0	3.311	1.999	3.625
Chr1L	117986366	117986867	L_prox_hi_1903	proximal_high_conf	0.554	1.863	2.437	2.059	2.562	3.613	4.005	4.053	3.941	0	4.213	2.285	3.625
Chr1L	117999789	118000290	L_dist_noab_1904	distal_noab_high	0.444	0.621	0.573	1.373	0.897	0.289	1.335	0	0	0	1.806	2.856	1.318
Chr1L	118100246	118100747	L_prox_hi_1905	proximal_high_conf	0.333	1.242	3.584	1.373	1.153	1.59	2.67	4.053	3.941	0	3.912	3.427	5.602
Chr1L	118226424	118226925	L_prox_hi_1906	proximal_high_conf	0.554	3.932	3.44	2.059	1.665	1.879	2.861	8.106	1.97	0	4.213	3.713	2.966
Chr1L	118316753	118317254	L_prox_lo_1907	proximal_low_conf	0.444	4.967	5.591	2.059	0.768	4.913	7.438	0	0	0	0.903	1.999	2.636
Chr1L	118324273	118324774	L_dist_lo_1908	distal_low_conf	0.887	2.069	3.584	2.059	0.64	5.058	6.103	4.053	5.911	0	1.204	2.856	0.989
Chr1L	118324823	118325324	L_dist_hi_1909	distal_high_conf	0.554	2.897	3.727	1.373	1.409	3.902	6.103	0	0	0	2.408	2.285	1.318
Chr1L	118326213	118326714	L_prox_lo_1910	proximal_low_conf	0.444	2.897	3.727	1.716	1.409	3.613	7.629	0	0	0	1.806	1.999	0.989
Chr1L	118326643	118327144	L_prox_lo_1911	proximal_low_conf	0.665	2.276	3.584	0.686	1.281	4.624	6.675	0	1.97	0	2.709	0.571	0.659
Chr1L	118329535	118330036	L_dist_hi_1912	distal_high_conf	0.554	4.76	3.727	0.686	1.409	3.902	6.866	0	1.97	0	2.107	1.428	2.307
Chr1L	118355903	118356404	L_prox_hi_1913	proximal_high_conf	0.222	2.483	1.29	1.373	0.897	2.168	4.386	8.106	3.941	0	4.213	1.714	2.307
Chr1L	118361035	118361536	L_dist_lo_1914	distal_low_conf	0.333	3.311	3.87	2.746	1.153	2.746	5.149	0	0	0	2.408	2.856	0.659
Chr1L	118444830	118445331	L_prox_hi_1915	proximal_high_conf	0.665	3.932	3.727	3.776	2.177	2.746	4.768	4.053	0	0	3.311	3.713	3.954
Chr1L	118507804	118508305	L_prox_hi_1916	proximal_high_conf	0.665	4.346	3.154	2.403	1.921	2.601	3.624	4.053	1.97	0	5.718	3.998	4.943
Chr1L	118515565	118516066	L_prox_lo_1917	proximal_low_conf	0.554	2.897	3.154	1.03	0.64	2.023	2.479	0	3.941	0	3.912	2.57	5.602
Chr1L	118537561	118538062	L_prox_noab_1918	proximal_noab_high	0.665	0.414	0.86	0	0.64	0.723	0	0	3.941	0	1.204	1.428	2.966
Chr1L	118540368	118540869	L_prox_lo_1919	proximal_low_conf	0.554	0.828	1.147	3.089	0.512	1.734	1.335	8.106	3.941	0	2.408	2.57	3.625
Chr1L	118654119	118654620	L_prox_lo_1920	proximal_low_conf	0.444	2.897	1.72	1.03	1.409	2.601	3.051	0	1.97	0	0.903	1.999	2.307
Chr1L	118668327	118668828	L_prox_hi_1921	proximal_high_conf	0.554	1.035	2.294	2.059	1.537	1.734	2.098	8.106	1.97	0	2.408	2.856	2.966
Chr1L	118734111	118734612	L_dist_lo_1922	distal_low_conf	0.444	1.449	2.58	2.403	1.409	0.723	2.098	0	0	0	1.806	1.428	0.659
Chr1L	118745925	118746426	L_prox_hi_1923	proximal_high_conf	0.887	2.69	4.444	4.805	1.921	1.301	1.716	0	0	0	3.612	3.998	4.943
Chr1L	118755649	118756150	L_prox_hi_1924	proximal_high_conf	0.554	1.656	1.864	2.746	1.409	1.734	1.716	0	1.97	0	3.311	2.285	3.625
Chr1L	118827042	118827543	L_prox_hi_1925	proximal_high_conf	0.665	2.897	6.164	2.746	1.665	2.168	2.479	0	5.911	0	2.408	3.713	2.307
Chr1L	118947504	118948005	L_prox_hi_1926	proximal_high_conf	0.333	2.897	1.864	0	1.153	0.867	1.526	8.106	0	0	1.505	1.142	1.977
Chr1L	118983034	118983535	L_dist_lo_1927	distal_low_conf	0.887	2.897	3.154	2.746	1.537	1.156	1.526	0	1.97	0	1.505	1.999	1.648
Chr1L	118989346	118989847	L_dist_lo_1928	distal_low_conf	0	0.621	0.573	1.373	0.64	0.434	0.763	0	1.97	0	0.903	1.428	1.318
Chr1L	118997396	118997897	L_prox_hi_1929	proximal_high_conf	0.665	3.311	4.444	2.059	2.177	2.168	1.335	8.106	5.911	8.334	5.718	4.569	5.602
Chr1L	118998639	118999140	L_prox_hi_1930	proximal_high_conf	0.333	1.449	3.154	1.373	1.665	1.012	0.763	4.053	1.97	0	2.107	2.856	2.636
Chr1L	119212425	119212926	L_prox_hi_1931	proximal_high_conf	0.222	1.863	2.58	0.686	1.665	1.012	2.67	0	3.941	0	2.709	1.142	2.307
Chr1L	119559228	119559729	L_prox_hi_1932	proximal_high_conf	0.554	2.897	4.444	3.776	1.025	3.179	4.386	4.053	3.941	0	5.116	4.569	4.614
Chr1L	119559877	119560378	L_prox_lo_1933	proximal_low_conf	0.776	2.897	4.874	1.373	1.025	3.468	5.912	8.106	7.882	0	3.311	4.284	1.318
Chr1L	119666788	119667289	L_dist_noab_1934	distal_noab_high	0.222	0.207	0.143	0	0.128	0.434	0	0	0	0	2.107	3.141	3.295
Chr1L	119707955	119708456	L_prox_hi_1935	proximal_high_conf	0.998	2.69	2.724	2.059	1.409	0.289	2.098	4.053	3.941	0	2.709	4.284	4.284
Chr1L	119715788	119716289	L_prox_hi_1936	proximal_high_conf	0.665	3.104	3.44	1.716	1.665	3.757	4.768	4.053	3.941	0	5.116	3.141	2.966
Chr1L	119716096	119716597	L_prox_lo_1937	proximal_low_conf	1.109	2.483	4.157	1.716	1.153	3.468	3.433	4.053	3.941	0	4.514	3.713	3.295
Chr1L	119760279	119760780	L_prox_hi_1938	proximal_high_conf	0.222	3.725	3.154	2.403	1.793	2.168	3.814	4.053	1.97	0	3.612	1.428	3.954
Chr1L	119763264	119763765	L_dist_hi_1939	distal_high_conf	0.554	3.518	3.584	2.746	0.897	3.324	7.056	4.053	0	0	4.815	2.856	1.977
Chr1L	119919511	119920012	L_dist_lo_1940	distal_low_conf	0.776	2.69	4.3	1.03	0.897	3.468	5.912	0	1.97	0	1.806	3.141	2.636
Chr1L	120364634	120365135	L_dist_lo_1941	distal_low_conf	0.444	1.242	0.86	1.03	0.897	0.578	0.191	0	0	0	2.107	1.428	0.659
Chr1L	120423910	120424411	L_prox_hi_1942	proximal_high_conf	0.111	1.242	2.437	2.059	1.153	2.312	3.624	0	1.97	0	2.408	3.998	2.636
Chr1L	120435334	120435835	L_dist_noab_1943	distal_noab_high	0.665	1.242	1.003	0	0.897	1.59	3.624	0	0	0	3.01	1.999	0.659
Chr1L	120452075	120452576	L_dist_lo_1944	distal_low_conf	0.554	2.897	2.437	1.03	0.768	2.89	4.005	0	0	8.334	0.903	2.856	0.989
Chr1L	120523911	120524412	L_prox_hi_1945	proximal_high_conf	0	1.449	2.15	1.373	0.768	1.301	3.624	0	0	0	1.204	1.999	1.977
Chr1L	120765976	120766477	L_dist_noab_1946	distal_noab_high	0.554	0.828	1.147	1.716	0.512	1.301	0.954	4.053	0	0	2.709	1.714	0.659
Chr1L	120780944	120781445	L_prox_hi_1947	proximal_high_conf	0.222	1.863	2.007	1.03	1.537	1.59	0.572	0	1.97	0	2.408	1.999	1.977
Chr1L	120794421	120794922	L_dist_noab_1948	distal_noab_high	0.333	0.414	0.43	0.343	1.281	1.734	0.572	0	0	0	1.505	2.57	1.977
Chr1L	120795020	120795521	L_dist_lo_1949	distal_low_conf	0.333	1.035	0.43	0.686	0.768	1.301	1.526	0	0	0	3.311	3.141	0.989
Chr1L	120795979	120796480	L_dist_noab_1950	distal_noab_high	0.776	0.621	1.72	1.03	0.897	2.457	3.814	0	1.97	0	2.408	3.427	1.977
Chr1L	120833079	120833580	L_prox_hi_1951	proximal_high_conf	0.333	3.518	2.58	1.373	1.153	2.023	2.098	4.053	5.911	0	3.01	1.142	3.295
Chr1L	120908773	120909274	L_dist_hi_1952	distal_high_conf	0.998	4.139	4.444	2.059	1.153	2.601	5.721	4.053	0	0	2.709	4.284	3.295
Chr1L	120933131	120933632	L_dist_noab_1953	distal_noab_high	0.554	0.414	0.143	0.686	0	0.434	0.381	0	0	0	1.505	1.142	0.659
Chr1L	120959521	120960022	L_prox_hi_1954	proximal_high_conf	0.444	1.863	1.72	0.686	1.025	1.156	1.335	8.106	5.911	8.334	3.612	8.282	11.204
Chr1L	120960019	120960520	L_prox_lo_1955	proximal_low_conf	0.333	1.656	2.867	1.716	1.409	1.734	2.098	4.053	1.97	8.334	0.903	3.141	4.284
Chr1L	121076886	121077387	L_dist_lo_1956	distal_low_conf	0.444	1.656	2.58	2.403	0.64	3.035	5.721	0	0	0	1.806	1.142	0.989
Chr1L	121095664	121096165	L_dist_lo_1957	distal_low_conf	0.333	1.656	3.44	1.03	0.64	0.578	2.098	0	0	0	2.709	3.427	0.659
Chr1L	121098686	121099187	L_dist_lo_1958	distal_low_conf	0.222	0.828	1.72	2.746	0.768	1.012	1.716	0	0	0	1.806	2.856	0.659
Chr1L	121207066	121207567	L_dist_noab_1959	distal_noab_high	0.998	0.414	0.43	0.343	0.897	0.145	0.381	4.053	0	0	1.204	1.999	0.33
Chr1L	121241521	121242022	L_prox_hi_1960	proximal_high_conf	0.444	2.897	1.003	1.716	2.049	1.012	1.907	0	5.911	8.334	2.408	3.427	2.307
Chr1L	121435983	121436484	L_dist_noab_1961	distal_noab_high	0.998	1.242	1.29	0.686	0.512	3.324	5.149	0	0	0	4.514	2.57	4.284
Chr1L	121451888	121452389	L_prox_hi_1962	proximal_high_conf	0.554	2.69	2.58	4.119	1.025	4.335	6.866	8.106	1.97	0	2.408	3.141	4.614
Chr1L	121491343	121491844	L_prox_lo_1963	proximal_low_conf	0.444	1.035	0.86	1.716	0.64	2.457	3.624	0	0	0	2.107	1.999	1.648
Chr1L	121665285	121665786	L_prox_hi_1964	proximal_high_conf	0.776	3.104	2.867	2.746	2.049	1.301	2.289	4.053	0	0	3.612	3.427	1.977
Chr1L	121702534	121703035	L_prox_hi_1965	proximal_high_conf	0.222	3.518	1.433	3.089	1.921	2.023	2.479	0	1.97	0	3.612	2.856	2.307
Chr1L	121855469	121855970	L_dist_noab_1966	distal_noab_high	0.776	0.828	0.573	0.343	1.409	0.867	0.763	4.053	3.941	0	2.709	3.141	1.318
Chr1L	121859323	121859824	L_prox_hi_1967	proximal_high_conf	0.444	2.483	2.437	1.373	1.793	3.179	3.814	0	1.97	0	4.213	5.426	4.614
Chr1L	121967546	121968047	L_dist_noab_1968	distal_noab_high	0.333	1.035	0.287	0	0.512	0.434	0.572	4.053	0	0	0.903	3.141	0.989
Chr1L	121990677	121991178	L_prox_hi_1969	proximal_high_conf	0.776	2.897	3.87	3.432	1.665	3.179	3.814	4.053	3.941	0	4.815	3.713	6.261
Chr1L	122097852	122098353	L_prox_hi_1970	proximal_high_conf	0.333	3.725	2.724	2.403	2.177	1.879	1.716	0	3.941	0	1.806	3.427	3.625
Chr1L	122115485	122115986	L_prox_hi_1971	proximal_high_conf	0.444	2.483	1.72	3.089	0.768	1.879	2.289	4.053	1.97	0	3.612	3.713	2.636
Chr1L	122116103	122116604	L_prox_hi_1972	proximal_high_conf	0.554	4.967	4.3	2.746	1.281	2.746	2.861	4.053	1.97	0	3.01	3.141	4.614
Chr1L	122197978	122198479	L_dist_hi_1973	distal_high_conf	0.333	2.483	2.294	1.373	2.049	1.59	1.526	8.106	1.97	16.667	3.311	3.998	2.636
Chr1L	122198437	122198938	L_prox_hi_1974	proximal_high_conf	0.333	2.897	3.01	2.059	1.793	1.59	1.526	4.053	7.882	0	4.514	3.713	3.295
Chr1L	122199156	122199657	L_prox_hi_1975	proximal_high_conf	0.444	3.104	2.007	2.746	0.897	1.59	1.907	0	0	0	3.311	2.856	2.636
Chr1L	122256040	122256541	L_prox_lo_1976	proximal_low_conf	1.109	1.656	2.294	3.432	1.921	3.468	4.005	0	1.97	0	4.514	4.569	5.273
Chr1L	122256565	122257066	L_prox_hi_1977	proximal_high_conf	0.776	2.483	2.007	1.03	2.177	2.168	3.624	0	1.97	0	3.311	2.285	2.636
Chr1L	122261572	122262073	L_dist_noab_1978	distal_noab_high	0.887	0.828	2.007	2.746	0.256	2.601	2.289	0	0	0	1.806	1.714	2.307
Chr1L	122267189	122267690	L_dist_hi_1979	distal_high_conf	0.554	3.725	2.724	3.432	1.281	2.746	5.912	0	1.97	0	2.107	1.999	2.636
Chr1L	122268165	122268666	L_dist_lo_1980	distal_low_conf	0.444	1.863	1.433	0.686	0.512	0.867	2.098	0	1.97	0	2.408	2.285	0.659
Chr1L	122358067	122358568	L_dist_lo_1981	distal_low_conf	0.444	0.621	1.29	2.403	0.64	0.867	0.381	0	0	0	1.204	1.428	0.989
Chr1L	122377160	122377661	L_prox_noab_1982	proximal_noab_high	0.444	1.035	0.143	1.03	0.64	0.578	0.381	0	0	0	0.301	1.142	1.977
Chr1L	122399611	122400112	L_prox_hi_1983	proximal_high_conf	0.111	2.069	2.724	1.373	1.537	2.168	2.479	0	7.882	0	5.718	3.998	3.295
Chr1L	122461279	122461780	L_dist_noab_1984	distal_noab_high	0.665	1.242	0.717	0.343	1.537	1.301	1.907	4.053	0	8.334	1.806	1.999	2.307
Chr1L	122476654	122477155	L_prox_lo_1985	proximal_low_conf	0.222	0.828	0.717	1.03	1.665	0.723	0.954	0	7.882	0	3.01	1.142	1.318
Chr1L	122477180	122477681	L_prox_hi_1986	proximal_high_conf	0.554	1.656	2.294	1.03	2.049	1.445	1.526	8.106	3.941	0	2.408	3.998	5.273
Chr1L	122640584	122641085	L_dist_lo_1987	distal_low_conf	0.222	1.035	0.287	0.343	0.512	1.012	0.572	0	0	0	0.903	1.714	0.659
Chr1L	122644857	122645358	L_dist_noab_1988	distal_noab_high	0.444	0.828	0.86	0.343	1.281	1.012	0.572	0	0	0	1.806	1.428	0.989
Chr1L	122702719	122703220	L_prox_hi_1989	proximal_high_conf	0.554	2.69	2.007	2.403	1.537	2.168	3.433	4.053	3.941	8.334	2.709	2.285	3.954
Chr1L	122741426	122741927	L_dist_noab_1990	distal_noab_high	0.554	0.414	0.717	0.343	0.768	0.867	1.144	4.053	1.97	0	2.709	3.427	1.318
Chr1L	122751757	122752258	L_dist_lo_1991	distal_low_conf	0.444	2.276	1.29	2.059	1.153	3.757	6.294	0	3.941	0	3.912	2.57	0
Chr1L	122752308	122752809	L_dist_hi_1992	distal_high_conf	0.333	3.518	2.15	3.776	1.281	4.046	8.392	12.158	13.793	0	5.417	6.569	2.966
Chr1L	122752879	122753380	L_dist_lo_1993	distal_low_conf	1.109	3.311	2.58	4.462	1.281	4.191	5.34	4.053	5.911	0	3.612	4.284	1.977
Chr1L	122759524	122760025	L_dist_hi_1994	distal_high_conf	0.554	6.415	5.304	2.746	2.049	5.492	5.531	4.053	11.823	0	2.408	3.998	2.307
Chr1L	122759933	122760434	L_dist_hi_1995	distal_high_conf	0.554	4.346	4.014	1.373	2.946	2.89	4.386	0	7.882	8.334	3.612	6.569	6.261
Chr1L	122803265	122803766	L_prox_hi_1996	proximal_high_conf	0.333	2.69	2.294	1.716	1.025	2.89	2.098	4.053	1.97	0	1.505	3.998	1.648
Chr1L	122803553	122804054	L_prox_hi_1997	proximal_high_conf	0.444	1.449	1.577	0.686	1.281	1.156	1.716	4.053	0	0	1.806	2.57	1.318
Chr1L	122806352	122806853	L_prox_lo_1998	proximal_low_conf	0.665	3.311	2.58	2.403	1.409	2.457	2.479	0	0	0	2.408	2.57	1.318
Chr1L	122811354	122811855	L_dist_noab_1999	distal_noab_high	0.333	0.621	0.717	0	0.512	0.578	0	0	1.97	0	1.204	2.856	0.659
[truncated: 56,224 more rows]

## Sheet: B. Pou,Sox bound elements
chr	start	end	id	PSbind	Pou_max_coord	Pou_rpkm	NoAb_rpkm1	Sox_max_coord	Sox_rpkm	NoAb_rpkm2
Chr1L	51529783	51530284	L_dist_hi_1001	S	Chr1L:51529910-51530110	0.257311	0.224991	Chr1L:51530161-51530361	0.622068	0.162495
Chr2L	98430378	98430879	L_dist_hi_10025	S	Chr2L:98430303-98430503	0.45395	0.224991	Chr2L:98430748-98430948	0.622068	0.162495
Chr2L	98430675	98431176	L_dist_hi_10026	S	Chr2L:98430675-98430875	0.45395	0.162495	Chr2L:98430748-98430948	0.622068	0.162495
Chr2L	101435422	101435923	L_dist_hi_10067	PS	Chr2L:101435729-101435929	0.925884	0.224991	Chr2L:101435588-101435788	2.47106	0.287486
Chr2L	101435709	101436210	L_dist_hi_10068	PS	Chr2L:101435729-101435929	0.925884	0.224991	Chr2L:101435619-101435819	2.42755	0.287486
Chr2L	106595152	106595653	L_dist_hi_10134	PS	Chr2L:106595093-106595293	2.14505	0.349981	Chr2L:106595218-106595418	4.95088	0.287486
Chr2L	107849444	107849945	L_dist_hi_10162	PS	Chr2L:107849532-107849732	0.729245	0.162495	Chr2L:107849532-107849732	0.904855	0.162495
Chr1L	51626657	51627158	L_dist_hi_1017	P	Chr1L:51626935-51627135	0.611261	0.287486	Chr1L:51626808-51627008	0.535057	0.287486
Chr1L	51627180	51627681	L_dist_hi_1018	PS	Chr1L:51627081-51627281	0.611261	0.287486	Chr1L:51627291-51627491	0.752585	0.287486
Chr1L	51633955	51634456	L_dist_hi_1019	PS	Chr1L:51634068-51634268	1.39782	0.349981	Chr1L:51634111-51634311	1.86198	0.349981
Chr1L	51634203	51634704	L_dist_hi_1020	PS	Chr1L:51634104-51634304	1.43714	0.349981	Chr1L:51634113-51634313	1.84023	0.349981
Chr2L	110843381	110843882	L_dist_hi_10215	S	Chr2L:110843381-110843581	0.296639	0.287486	Chr2L:110843454-110843654	1.03537	0.349981
Chr2L	110863625	110864126	L_dist_hi_10219	PS	Chr2L:110863574-110863774	1.04387	0.412476	Chr2L:110863560-110863760	1.20939	0.349981
Chr2L	113453036	113453537	L_dist_hi_10259	S	Chr2L:113453129-113453329	0.729245	0.474972	Chr2L:113453129-113453329	2.31879	0.474972
Chr2L	113632889	113633390	L_dist_hi_10262	PS	Chr2L:113633105-113633305	0.847228	0.224991	Chr2L:113633007-113633207	1.49218	0.224991
Chr2L	115942724	115943225	L_dist_hi_10301	S	Chr2L:115942625-115942825	0.414622	0.412476	Chr2L:115942918-115943118	0.687327	0.287486
Chr2L	119516173	119516674	L_dist_hi_10387	S	Chr2L:119516266-119516466	0.571934	0.474972	Chr2L:119516298-119516498	1.07888	0.474972
Chr2L	121159740	121160241	L_dist_hi_10425	PS	Chr2L:121159939-121160139	0.571934	0.224991	Chr2L:121159686-121159886	0.926608	0.349981
Chr2L	121160446	121160947	L_dist_hi_10426	S	Chr2L:121160557-121160757	0.45395	0.412476	Chr2L:121160627-121160827	0.948361	0.412476
Chr2L	121181010	121181511	L_dist_hi_10430	S	Chr2L:121181131-121181331	0.493278	0.162495	Chr2L:121181036-121181236	0.535057	0.224991
Chr2L	121185176	121185677	L_dist_hi_10431	S	Chr2L:121185111-121185311	0.414622	0.412476	Chr2L:121185438-121185638	0.687327	0.287486
Chr2L	121186184	121186685	L_dist_hi_10432	S	Chr2L:121186259-121186459	0.296639	0.287486	Chr2L:121186302-121186502	0.622068	0.224991
Chr1L	54057129	54057630	L_dist_hi_1044	S	Chr1L:54057030-54057230	0.571934	0.412476	Chr1L:54057137-54057337	1.38342	0.474972
Chr2L	122228097	122228598	L_dist_hi_10454	PS	Chr2L:122228104-122228304	0.689917	0.224991	Chr2L:122228122-122228322	0.709079	0.224991
Chr2L	123047601	123048102	L_dist_hi_10465	PS	Chr2L:123047988-123048188	0.729245	0.162495	Chr2L:123047876-123048076	1.53569	0.162495
Chr2L	123050459	123050960	L_dist_hi_10467	PS	Chr2L:123050631-123050831	0.729245	0.224991	Chr2L:123050575-123050775	0.513304	0.224991
Chr2L	123256319	123256820	L_dist_hi_10474	S	Chr2L:123256546-123256746	0.217983	0.224991	Chr2L:123256261-123256461	0.578562	0.287486
Chr2L	123257747	123258248	L_dist_hi_10477	PS	Chr2L:123257962-123258162	0.532606	0.224991	Chr2L:123257934-123258134	0.904855	0.224991
Chr2L	125702251	125702752	L_dist_hi_10513	P	Chr2L:125702423-125702623	0.571934	0.162495	Chr2L:125702152-125702352	0.491551	0.224991
Chr2L	125710524	125711025	L_dist_hi_10520	S	Chr2L:125710517-125710717	0.45395	0.162495	Chr2L:125710708-125710908	1.23115	0.224991
Chr2L	125731310	125731811	L_dist_hi_10531	S	Chr2L:125731454-125731654	0.45395	0.287486	Chr2L:125731419-125731619	0.687327	0.224991
Chr2L	125731878	125732379	L_dist_hi_10533	PS	Chr2L:125732277-125732477	0.532606	0.224991	Chr2L:125731820-125732020	0.513304	0.224991
Chr2L	125750559	125751060	L_dist_hi_10538	S	Chr2L:125750691-125750891	0.532606	0.537467	Chr2L:125750751-125750951	1.31816	0.599962
Chr2L	127416292	127416793	L_dist_hi_10570	S	Chr2L:127416570-127416770	0.611261	0.474972	Chr2L:127416431-127416631	1.16589	0.349981
Chr1L	54396045	54396546	L_dist_hi_1060	S	Chr1L:54395946-54396146	0.375295	0.162495	Chr1L:54396217-54396417	1.18764	0.224991
Chr2L	130519431	130519932	L_dist_hi_10602	S	Chr2L:130519615-130519815	0.532606	0.412476	Chr2L:130519662-130519862	1.2529	0.349981
Chr1L	54406576	54407077	L_dist_hi_1061	S	Chr1L:54406972-54407172	0.532606	0.412476	Chr1L:54406610-54406810	2.27528	0.412476
Chr2L	133023527	133024028	L_dist_hi_10658	S	Chr2L:133023553-133023753	0.689917	0.349981	Chr2L:133023701-133023901	1.55744	0.412476
Chr2L	135450968	135451469	L_dist_hi_10686	S	Chr2L:135450968-135451168	0.335967	0.224991	Chr2L:135451152-135451352	1.03537	0.349981
Chr2L	138316005	138316506	L_dist_hi_10705	S	Chr2L:138316160-138316360	0.650589	0.412476	Chr2L:138316397-138316597	0.883102	0.412476
Chr2L	138578197	138578698	L_dist_hi_10722	S	Chr2L:138578098-138578298	0.296639	0.287486	Chr2L:138578300-138578500	0.839596	0.287486
Chr2L	138582526	138583027	L_dist_hi_10724	PS	Chr2L:138582700-138582900	0.847228	0.349981	Chr2L:138582446-138582646	1.33991	0.287486
Chr2L	138599812	138600313	L_dist_hi_10726	S	Chr2L:138599856-138600056	0.375295	0.224991	Chr2L:138599961-138600161	0.883102	0.224991
Chr2L	139802621	139803122	L_dist_hi_10760	S	Chr2L:139802814-139803014	0.886556	0.474972	Chr2L:139802708-139802908	1.90549	0.474972
Chr2L	139998909	139999410	L_dist_hi_10763	S	Chr2L:139999092-139999292	0.45395	0.287486	Chr2L:139999057-139999257	2.4058	0.287486
Chr1L	56030002	56030503	L_dist_hi_1078	S	Chr1L:56030102-56030302	0.493278	0.162495	Chr1L:56030155-56030355	0.991866	0.162495
Chr2L	140727095	140727596	L_dist_hi_10781	S	Chr2L:140727217-140727417	0.689917	0.349981	Chr2L:140727232-140727432	1.03537	0.224991
Chr1L	56040947	56041448	L_dist_hi_1079	PS	Chr1L:56040933-56041133	0.729245	0.349981	Chr1L:56040876-56041076	1.86198	0.349981
Chr2L	141497221	141497722	L_dist_hi_10802	PS	Chr2L:141497388-141497588	1.71244	0.412476	Chr2L:141497388-141497588	3.66747	0.412476
Chr2L	141499216	141499717	L_dist_hi_10804	S	Chr2L:141499117-141499317	0.45395	0.224991	Chr2L:141499126-141499326	0.513304	0.224991
Chr2L	141501535	141502036	L_dist_hi_10806	PS	Chr2L:141501835-141502035	1.75177	0.287486	Chr2L:141501771-141501971	3.84149	0.287486
Chr2L	141636592	141637093	L_dist_hi_10813	PS	Chr2L:141636599-141636799	0.847228	0.224991	Chr2L:141636741-141636941	1.38342	0.224991
Chr2L	141739256	141739757	L_dist_hi_10822	S	Chr2L:141739157-141739357	0.296639	0.224991	Chr2L:141739398-141739598	1.14414	0.349981
Chr2L	142076987	142077488	L_dist_hi_10835	PS	Chr2L:142077156-142077356	0.768572	0.287486	Chr2L:142077128-142077328	1.51393	0.412476
Chr2L	142420458	142420959	L_dist_hi_10849	S	Chr2L:142420765-142420965	0.335967	0.162495	Chr2L:142420594-142420794	0.796091	0.162495
Chr2L	142620342	142620843	L_dist_hi_10855	S	Chr2L:142620480-142620680	0.414622	0.287486	Chr2L:142620425-142620625	0.883102	0.349981
Chr2L	142682167	142682668	L_dist_hi_10856	PS	Chr2L:142682218-142682418	0.532606	0.224991	Chr2L:142682162-142682362	0.513304	0.224991
Chr2L	142789333	142789834	L_dist_hi_10860	S	Chr2L:142789333-142789533	0.375295	0.349981	Chr2L:142789549-142789749	0.926608	0.1
Chr2L	143105631	143106132	L_dist_hi_10874	PS	Chr2L:143105935-143106135	0.611261	0.224991	Chr2L:143105644-143105844	2.38405	0.224991
Chr2L	143107036	143107537	L_dist_hi_10875	PS	Chr2L:143107171-143107371	0.689917	0.224991	Chr2L:143107149-143107349	1.16589	0.224991
Chr2L	143721294	143721795	L_dist_hi_10900	PS	Chr2L:143721604-143721804	0.886556	0.412476	Chr2L:143721600-143721800	1.2529	0.412476
Chr2L	144268700	144269201	L_dist_hi_10929	S	Chr2L:144268934-144269134	0.571934	0.349981	Chr2L:144268849-144269049	0.687327	0.287486
Chr2L	144598395	144598896	L_dist_hi_10954	S	Chr2L:144598661-144598861	0.414622	0.287486	Chr2L:144598459-144598659	1.07888	0.412476
Chr2L	144867374	144867875	L_dist_hi_10976	PS	Chr2L:144867615-144867815	1.55513	0.412476	Chr2L:144867706-144867906	1.60095	0.349981
Chr2L	147624118	147624619	L_dist_hi_11051	PS	Chr2L:147624290-147624490	1.71244	0.162495	Chr2L:147624299-147624499	2.53632	0.162495
Chr2L	147781431	147781932	L_dist_hi_11056	S	Chr2L:147781665-147781865	0.532606	0.349981	Chr2L:147781510-147781710	0.730832	0.349981
Chr2L	148435827	148436328	L_dist_hi_11073	PS	Chr2L:148436110-148436310	0.532606	0.162495	Chr2L:148436212-148436412	1.27465	0.287486
Chr2L	148455294	148455795	L_dist_hi_11087	PS	Chr2L:148455442-148455642	1.35849	0.287486	Chr2L:148455475-148455675	3.64571	0.287486
Chr2L	148455677	148456178	L_dist_hi_11088	PS	Chr2L:148455597-148455797	1.31916	0.224991	Chr2L:148455578-148455778	2.66683	0.224991
Chr1L	57570055	57570556	L_dist_hi_1109	S	Chr1L:57569956-57570156	0.375295	0.162495	Chr1L:57570108-57570308	0.665574	0.287486
Chr2L	148457897	148458398	L_dist_hi_11091	PS	Chr2L:148457798-148457998	0.925884	0.287486	Chr2L:148457812-148458012	1.57919	0.224991
Chr2L	148465630	148466131	L_dist_hi_11094	PS	Chr2L:148465733-148465933	0.8079	0.349981	Chr2L:148465733-148465933	1.27465	0.349981
Chr2L	148466833	148467334	L_dist_hi_11095	PS	Chr2L:148467156-148467356	1.43714	0.474972	Chr2L:148466950-148467150	2.42755	0.412476
Chr2L	148467202	148467703	L_dist_hi_11096	PS	Chr2L:148467413-148467613	1.86975	0.474972	Chr2L:148467398-148467598	3.10189	0.474972
Chr2L	148803398	148803899	L_dist_hi_11103	S	Chr2L:148803494-148803694	0.45395	0.162495	Chr2L:148803500-148803700	0.535057	0.162495
Chr1L	57710678	57711179	L_dist_hi_1111	S	Chr1L:57710678-57710878	0.886556	0.599962	Chr1L:57710902-57711102	1.42692	0.662457
Chr2L	150846775	150847276	L_dist_hi_11156	PS	Chr2L:150846707-150846907	0.532606	0.162495	Chr2L:150846722-150846922	0.796091	0.162495
Chr1L	58278769	58279270	L_dist_hi_1116	PS	Chr1L:58278966-58279166	0.571934	0.224991	Chr1L:58278847-58279047	1.29641	0.287486
Chr2L	151000962	151001463	L_dist_hi_11168	S	Chr2L:151001021-151001221	0.296639	0.162495	Chr2L:151001060-151001260	0.796091	0.162495
Chr2L	151779413	151779914	L_dist_hi_11179	S	Chr2L:151779515-151779715	0.257311	0.1	Chr2L:151779520-151779720	0.622068	0.1
Chr2L	153715194	153715695	L_dist_hi_11227	PS	Chr2L:153715116-153715316	0.571934	0.162495	Chr2L:153715144-153715344	1.31816	0.162495
Chr2L	153716944	153717445	L_dist_hi_11229	PS	Chr2L:153717176-153717376	0.768572	0.349981	Chr2L:153716981-153717181	2.64508	0.349981
Chr2L	153720631	153721132	L_dist_hi_11231	S	Chr2L:153720867-153721067	0.335967	0.1	Chr2L:153720832-153721032	0.730832	0.1
Chr2L	154048309	154048810	L_dist_hi_11241	S	Chr2L:154048309-154048509	0.296639	0.224991	Chr2L:154048440-154048640	0.535057	0.162495
Chr2L	154161435	154161936	L_dist_hi_11250	S	Chr2L:154161587-154161787	0.375295	0.224991	Chr2L:154161336-154161536	0.752585	0.1
Chr2L	154288807	154289308	L_dist_hi_11269	S	Chr2L:154289053-154289253	0.414622	0.474972	Chr2L:154288950-154289150	0.861349	0.412476
Chr2L	154354070	154354571	L_dist_hi_11274	S	Chr2L:154354198-154354398	0.414622	0.287486	Chr2L:154354266-154354466	0.600315	0.287486
Chr2L	154708807	154709308	L_dist_hi_11286	PS	Chr2L:154709074-154709274	1.00454	0.349981	Chr2L:154708993-154709193	1.51393	0.349981
Chr1L	58636181	58636682	L_dist_hi_1132	PS	Chr1L:58636308-58636508	1.00454	0.162495	Chr1L:58636291-58636491	1.73146	0.162495
Chr2L	155471077	155471578	L_dist_hi_11327	PS	Chr2L:155471401-155471601	1.27983	0.349981	Chr2L:155471130-155471330	1.88373	0.224991
Chr2L	155485486	155485987	L_dist_hi_11333	S	Chr2L:155485539-155485739	0.414622	0.224991	Chr2L:155485657-155485857	0.948361	0.349981
Chr1L	58644760	58645261	L_dist_hi_1137	S	Chr1L:58645104-58645304	0.217983	0.349981	Chr1L:58645002-58645202	0.55681	0.224991
Chr2L	157996593	157997094	L_dist_hi_11411	S	Chr2L:157996508-157996708	0.375295	0.287486	Chr2L:157996595-157996795	0.665574	0.287486
Chr2L	158306800	158307301	L_dist_hi_11416	S	Chr2L:158306704-158306904	0.296639	0.162495	Chr2L:158307033-158307233	0.796091	0.162495
Chr2L	160973068	160973569	L_dist_hi_11482	S	Chr2L:160973226-160973426	0.729245	0.537467	Chr2L:160973241-160973441	1.84023	0.537467
Chr2L	161605215	161605716	L_dist_hi_11494	PS	Chr2L:161605543-161605743	0.611261	0.162495	Chr2L:161605249-161605449	1.40517	0.349981
Chr2L	162010082	162010583	L_dist_hi_11506	PS	Chr2L:162010222-162010422	0.847228	0.349981	Chr2L:162010240-162010440	1.03537	0.349981
Chr2L	162015623	162016124	L_dist_hi_11507	PS	Chr2L:162015542-162015742	0.925884	0.349981	Chr2L:162015628-162015828	1.07888	0.349981
Chr2L	162019855	162020356	L_dist_hi_11509	PS	Chr2L:162020171-162020371	2.2237	0.224991	Chr2L:162020250-162020450	2.88436	0.287486
Chr2L	162020109	162020610	L_dist_hi_11510	PS	Chr2L:162020270-162020470	2.06639	0.287486	Chr2L:162020270-162020470	2.64508	0.287486
Chr2L	162020580	162021081	L_dist_hi_11511	PS	Chr2L:162020481-162020681	1.12252	0.287486	Chr2L:162020481-162020681	1.42692	0.287486
Chr2L	164618949	164619450	L_dist_hi_11574	PS	Chr2L:164619145-164619345	0.847228	0.412476	Chr2L:164619104-164619304	1.49218	0.224991
Chr2L	164619775	164620276	L_dist_hi_11575	PS	Chr2L:164619904-164620104	1.16185	0.287486	Chr2L:164619834-164620034	2.27528	0.349981
Chr1L	59658981	59659482	L_dist_hi_1158	S	Chr1L:59659232-59659432	1.12252	0.599962	Chr1L:59659269-59659469	1.90549	0.599962
Chr2L	166529488	166529989	L_dist_hi_11625	S	Chr2L:166529389-166529589	0.335967	0.224991	Chr2L:166529498-166529698	0.578562	0.224991
Chr1L	60028945	60029446	L_dist_hi_1166	PS	Chr1L:60028860-60029060	0.886556	0.349981	Chr1L:60029032-60029232	0.817844	0.224991
Chr1L	60029328	60029829	L_dist_hi_1167	S	Chr1L:60029254-60029454	0.335967	0.162495	Chr1L:60029520-60029720	0.55681	0.224991
Chr1L	60035344	60035845	L_dist_hi_1172	S	Chr1L:60035364-60035564	0.45395	0.412476	Chr1L:60035732-60035932	0.774338	0.224991
Chr1L	60035679	60036180	L_dist_hi_1173	PS	Chr1L:60035852-60036052	0.532606	0.1	Chr1L:60035746-60035946	0.796091	0.224991
Chr2L	171800729	171801230	L_dist_hi_11735	S	Chr2L:171800934-171801134	0.335967	0.287486	Chr2L:171800948-171801148	1.03537	0.287486
Chr2L	183140335	183140836	L_dist_hi_11996	S	Chr2L:183140335-183140535	0.45395	0.287486	Chr2L:183140535-183140735	0.991866	0.287486
Chr2L	183154920	183155421	L_dist_hi_12002	PS	Chr2L:183155204-183155404	0.611261	0.224991	Chr2L:183155107-183155307	0.861349	0.224991
Chr2L	183155400	183155901	L_dist_hi_12003	S	Chr2L:183155346-183155546	0.493278	0.224991	Chr2L:183155566-183155766	1.07888	0.349981
Chr2L	184034338	184034839	L_dist_hi_12030	S	Chr2L:184034539-184034739	0.335967	0.287486	Chr2L:184034459-184034659	1.36166	0.287486
Chr2L	184264860	184265361	L_dist_hi_12056	S	Chr2L:184264813-184265013	0.414622	0.162495	Chr2L:184265051-184265251	0.535057	0.224991
Chr2L	184851535	184852036	L_dist_hi_12105	S	Chr2L:184851540-184851740	0.45395	0.349981	Chr2L:184851601-184851801	0.535057	0.224991
Chr2L	186309094	186309595	L_dist_hi_12142	PS	Chr2L:186309338-186309538	0.965211	0.287486	Chr2L:186309275-186309475	1.86198	0.287486
Chr2L	186309668	186310169	L_dist_hi_12143	S	Chr2L:186309614-186309814	0.571934	0.474972	Chr2L:186309890-186310090	1.47043	0.224991
Chr2L	186314248	186314749	L_dist_hi_12144	PS	Chr2L:186314271-186314471	1.00454	0.162495	Chr2L:186314262-186314462	1.73146	0.162495
Chr2L	186315976	186316477	L_dist_hi_12145	PS	Chr2L:186316112-186316312	1.63378	0.474972	Chr2L:186316140-186316340	2.05776	0.474972
Chr2L	186821652	186822153	L_dist_hi_12166	S	Chr2L:186821757-186821957	0.296639	0.412476	Chr2L:186821828-186822028	1.10063	0.412476
Chr1L	62927881	62928382	L_dist_hi_1244	PS	Chr1L:62928059-62928259	0.8079	0.162495	Chr1L:62928021-62928221	2.31879	0.224991
Chr1L	64333084	64333585	L_dist_hi_1258	S	Chr1L:64333084-64333284	0.178656	0.287486	Chr1L:64333274-64333474	0.839596	0.224991
Chr1L	65928568	65929069	L_dist_hi_1288	PS	Chr1L:65928545-65928745	1.08319	0.287486	Chr1L:65928750-65928950	2.29704	0.287486
Chr1L	65930037	65930538	L_dist_hi_1289	S	Chr1L:65930434-65930634	0.689917	0.349981	Chr1L:65930437-65930637	1.73146	0.349981
Chr1L	68233891	68234392	L_dist_hi_1312	P	Chr1L:68233938-68234138	0.729245	0.349981	Chr1L:68234071-68234271	0.513304	0.349981
Chr1L	69665664	69666165	L_dist_hi_1335	PS	Chr1L:69665597-69665797	0.925884	0.412476	Chr1L:69665741-69665941	2.10126	0.474972
Chr1L	69666063	69666564	L_dist_hi_1336	S	Chr1L:69665964-69666164	0.611261	0.349981	Chr1L:69666278-69666478	0.622068	0.287486
Chr1L	70560958	70561459	L_dist_hi_1345	PS	Chr1L:70561067-70561267	0.689917	0.287486	Chr1L:70561292-70561492	0.904855	0.412476
Chr1L	9957390	9957891	L_dist_hi_136	S	Chr1L:9957494-9957694	0.45395	0.287486	Chr1L:9957766-9957966	1.40517	0.349981
Chr1L	9959680	9960181	L_dist_hi_137	PS	Chr1L:9959766-9959966	1.04387	0.349981	Chr1L:9959647-9959847	1.29641	0.474972
Chr1L	72138880	72139381	L_dist_hi_1371	S	Chr1L:72139089-72139289	0.296639	0.224991	Chr1L:72138993-72139193	0.687327	0.162495
Chr1L	72161381	72161882	L_dist_hi_1377	S	Chr1L:72161511-72161711	0.532606	0.412476	Chr1L:72161510-72161710	1.2529	0.412476
Chr1L	72671232	72671733	L_dist_hi_1388	PS	Chr1L:72671422-72671622	1.12252	0.287486	Chr1L:72671466-72671666	1.18764	0.349981
Chr1L	74861894	74862395	L_dist_hi_1410	PS	Chr1L:74862172-74862372	1.16185	0.412476	Chr1L:74862071-74862271	1.86198	0.412476
Chr1L	9990349	9990850	L_dist_hi_142	PS	Chr1L:9990456-9990656	0.689917	0.287486	Chr1L:9990609-9990809	2.55807	0.287486
Chr1L	76008212	76008713	L_dist_hi_1425	S	Chr1L:76008454-76008654	0.532606	0.349981	Chr1L:76008447-76008647	1.33991	0.349981
Chr1L	76008437	76008938	L_dist_hi_1426	S	Chr1L:76008454-76008654	0.532606	0.349981	Chr1L:76008447-76008647	1.33991	0.349981
Chr1L	76008733	76009234	L_dist_hi_1427	S	Chr1L:76008634-76008834	0.257311	0.349981	Chr1L:76008922-76009122	0.752585	0.287486
Chr1L	81852314	81852815	L_dist_hi_1484	S	Chr1L:81852258-81852458	0.375295	0.162495	Chr1L:81852661-81852861	0.687327	0.224991
Chr1L	10002392	10002893	L_dist_hi_150	PS	Chr1L:10002535-10002735	1.04387	0.224991	Chr1L:10002535-10002735	1.88373	0.224991
Chr1L	85646279	85646780	L_dist_hi_1520	PS	Chr1L:85646374-85646574	0.532606	0.162495	Chr1L:85646428-85646628	0.513304	0.162495
Chr3L	1352578	1353079	L_dist_hi_15722	S	Chr3L:1352733-1352933	0.335967	0.287486	Chr3L:1352688-1352888	1.33991	0.287486
Chr1L	92206409	92206910	L_dist_hi_1583	PS	Chr1L:92206707-92206907	0.8079	0.349981	Chr1L:92206748-92206948	2.34054	0.349981
Chr1L	92215464	92215965	L_dist_hi_1586	S	Chr1L:92215616-92215816	0.650589	0.349981	Chr1L:92215489-92215689	0.622068	0.287486
Chr3L	4448281	4448782	L_dist_hi_15887	P	Chr3L:4448623-4448823	0.532606	0.224991	Chr3L:4448573-4448773	0.469798	0.287486
Chr1L	92830782	92831283	L_dist_hi_1592	PS	Chr1L:92830703-92830903	0.886556	0.162495	Chr1L:92830926-92831126	0.665574	0.1
Chr1L	93153083	93153584	L_dist_hi_1594	S	Chr1L:93153452-93153652	0.8079	0.537467	Chr1L:93153405-93153605	1.9925	0.537467
Chr1L	93153281	93153782	L_dist_hi_1595	S	Chr1L:93153452-93153652	0.8079	0.537467	Chr1L:93153405-93153605	1.9925	0.537467
Chr1L	95236500	95237001	L_dist_hi_1604	S	Chr1L:95236717-95236917	0.611261	0.349981	Chr1L:95236822-95237022	1.12238	0.349981
Chr1L	10121990	10122491	L_dist_hi_161	PS	Chr1L:10122028-10122228	0.729245	0.349981	Chr1L:10122217-10122417	2.42755	0.349981
Chr3L	16487717	16488218	L_dist_hi_16140	S	Chr3L:16487912-16488112	0.414622	0.224991	Chr3L:16488041-16488241	0.513304	0.224991
Chr3L	17871676	17872177	L_dist_hi_16162	PS	Chr3L:17871772-17871972	0.571934	0.224991	Chr3L:17871778-17871978	0.817844	0.224991
Chr3L	18354589	18355090	L_dist_hi_16164	PS	Chr3L:18354664-18354864	1.59446	0.474972	Chr3L:18354707-18354907	1.81847	0.474972
Chr3L	18474398	18474899	L_dist_hi_16165	PS	Chr3L:18474508-18474708	0.729245	0.224991	Chr3L:18474753-18474953	1.29641	0.1
Chr3L	18474797	18475298	L_dist_hi_16166	PS	Chr3L:18474753-18474953	0.689917	0.1	Chr3L:18474840-18475040	1.38342	0.287486
Chr3L	21149220	21149721	L_dist_hi_16189	PS	Chr3L:21149357-21149557	0.8079	0.224991	Chr3L:21149332-21149532	0.970113	0.224991
Chr3L	22345602	22346103	L_dist_hi_16199	S	Chr3L:22345823-22346023	0.414622	0.224991	Chr3L:22345702-22345902	1.03537	0.224991
Chr3L	25983944	25984445	L_dist_hi_16238	S	Chr3L:25984182-25984382	0.296639	0.162495	Chr3L:25983845-25984045	0.535057	0.162495
Chr3L	26789002	26789503	L_dist_hi_16244	PS	Chr3L:26789225-26789425	1.71244	0.224991	Chr3L:26789362-26789562	2.23178	0.162495
Chr3L	26789446	26789947	L_dist_hi_16245	PS	Chr3L:26789362-26789562	1.43714	0.162495	Chr3L:26789362-26789562	2.23178	0.162495
Chr3L	28166586	28167087	L_dist_hi_16269	S	Chr3L:28166674-28166874	0.45395	0.287486	Chr3L:28166728-28166928	0.904855	0.224991
Chr3L	28169963	28170464	L_dist_hi_16270	PS	Chr3L:28170006-28170206	0.611261	0.287486	Chr3L:28170113-28170313	1.47043	0.224991
Chr3L	28171439	28171940	L_dist_hi_16271	S	Chr3L:28171531-28171731	0.532606	0.287486	Chr3L:28171587-28171787	0.513304	0.224991
Chr3L	30359702	30360203	L_dist_hi_16304	P	Chr3L:30359803-30360003	0.847228	0.224991	Chr3L:30359623-30359823	0.491551	0.287486
Chr3L	35004756	35005257	L_dist_hi_16346	S	Chr3L:35004830-35005030	0.650589	0.349981	Chr3L:35004798-35004998	1.07888	0.349981
Chr3L	36106910	36107411	L_dist_hi_16353	S	Chr3L:36106917-36107117	0.45395	0.287486	Chr3L:36107193-36107393	0.687327	0.162495
Chr3L	38253254	38253755	L_dist_hi_16398	S	Chr3L:38253355-38253555	0.611261	0.474972	Chr3L:38253358-38253558	1.60095	0.474972
Chr3L	43655823	43656324	L_dist_hi_16432	PS	Chr3L:43656064-43656264	0.689917	0.224991	Chr3L:43655986-43656186	1.29641	0.224991
Chr3L	49260298	49260799	L_dist_hi_16517	S	Chr3L:49260535-49260735	0.847228	0.474972	Chr3L:49260412-49260612	1.57919	0.224991
Chr3L	49484867	49485368	L_dist_hi_16524	S	Chr3L:49484928-49485128	0.414622	0.287486	Chr3L:49485011-49485211	0.600315	0.287486
Chr3L	50048414	50048915	L_dist_hi_16532	S	Chr3L:50048518-50048718	0.532606	0.349981	Chr3L:50048503-50048703	2.16652	0.349981
Chr3L	50089973	50090474	L_dist_hi_16535	S	Chr3L:50090369-50090569	0.532606	0.474972	Chr3L:50090151-50090351	0.578562	0.287486
Chr3L	50878722	50879223	L_dist_hi_16545	S	Chr3L:50878623-50878823	0.650589	0.412476	Chr3L:50878733-50878933	1.18764	0.474972
Chr3L	51046108	51046609	L_dist_hi_16551	PS	Chr3L:51046212-51046412	0.8079	0.287486	Chr3L:51046212-51046412	0.665574	0.287486
Chr3L	51047554	51048055	L_dist_hi_16552	S	Chr3L:51047512-51047712	0.375295	0.1	Chr3L:51047680-51047880	0.513304	0.224991
Chr3L	53747668	53748169	L_dist_hi_16620	PS	Chr3L:53747600-53747800	0.611261	0.224991	Chr3L:53747668-53747868	1.07888	0.287486
Chr3L	54500444	54500945	L_dist_hi_16630	S	Chr3L:54500666-54500866	0.414622	0.349981	Chr3L:54500533-54500733	0.883102	0.349981
Chr3L	54628724	54629225	L_dist_hi_16633	S	Chr3L:54629058-54629258	0.493278	0.224991	Chr3L:54629086-54629286	1.44868	0.224991
Chr3L	54669944	54670445	L_dist_hi_16635	S	Chr3L:54670240-54670440	0.847228	0.474972	Chr3L:54670337-54670537	1.33991	0.412476
Chr3L	55551745	55552246	L_dist_hi_16671	S	Chr3L:55551918-55552118	0.45395	0.412476	Chr3L:55551704-55551904	0.535057	0.224991
Chr3L	56557825	56558326	L_dist_hi_16696	S	Chr3L:56557891-56558091	0.217983	0.287486	Chr3L:56557958-56558158	0.991866	0.349981
Chr3L	57324118	57324619	L_dist_hi_16713	PS	Chr3L:57324248-57324448	0.689917	0.224991	Chr3L:57324315-57324515	0.730832	0.224991
Chr3L	59310559	59311060	L_dist_hi_16745	S	Chr3L:59310559-59310759	0.296639	0.287486	Chr3L:59310890-59311090	0.513304	0.224991
Chr3L	60903930	60904431	L_dist_hi_16758	S	Chr3L:60903831-60904031	0.335967	0.224991	Chr3L:60903831-60904031	0.622068	0.224991
Chr3L	62672099	62672600	L_dist_hi_16774	PS	Chr3L:62672244-62672444	0.689917	0.287486	Chr3L:62672235-62672435	0.948361	0.287486
Chr1L	103559151	103559652	L_dist_hi_1679	PS	Chr1L:103559473-103559673	0.689917	0.287486	Chr1L:103559462-103559662	2.64508	0.287486
Chr3L	64030474	64030975	L_dist_hi_16809	PS	Chr3L:64030799-64030999	0.650589	0.287486	Chr3L:64030798-64030998	1.40517	0.287486
Chr3L	64030715	64031216	L_dist_hi_16810	PS	Chr3L:64030799-64030999	0.650589	0.287486	Chr3L:64030798-64030998	1.40517	0.287486
Chr3L	64034217	64034718	L_dist_hi_16812	P	Chr3L:64034299-64034499	0.571934	0.224991	Chr3L:64034118-64034318	0.491551	0.162495
Chr3L	64043033	64043534	L_dist_hi_16819	S	Chr3L:64043084-64043284	0.493278	0.287486	Chr3L:64043208-64043408	0.991866	0.224991
Chr3L	64043342	64043843	L_dist_hi_16820	S	Chr3L:64043638-64043838	0.296639	0.349981	Chr3L:64043243-64043443	1.01362	0.287486
Chr3L	64045976	64046477	L_dist_hi_16823	PS	Chr3L:64045984-64046184	0.689917	0.224991	Chr3L:64046038-64046238	0.687327	0.287486
Chr3L	64597306	64597807	L_dist_hi_16843	S	Chr3L:64597454-64597654	0.493278	0.412476	Chr3L:64597503-64597703	1.73146	0.412476
Chr3L	64835583	64836084	L_dist_hi_16859	PS	Chr3L:64835939-64836139	0.925884	0.224991	Chr3L:64835981-64836181	2.25353	0.224991
Chr3L	64836141	64836642	L_dist_hi_16860	PS	Chr3L:64836147-64836347	1.59446	0.224991	Chr3L:64836153-64836353	2.34054	0.224991
Chr3L	64842285	64842786	L_dist_hi_16861	S	Chr3L:64842673-64842873	0.257311	0.287486	Chr3L:64842588-64842788	0.600315	0.287486
Chr3L	65029261	65029762	L_dist_hi_16868	S	Chr3L:65029191-65029391	0.414622	0.287486	Chr3L:65029214-65029414	0.948361	0.287486
Chr3L	68386575	68387076	L_dist_hi_16934	PS	Chr3L:68386527-68386727	0.965211	0.349981	Chr3L:68386704-68386904	2.64508	0.287486
Chr3L	69159272	69159773	L_dist_hi_16939	PS	Chr3L:69159526-69159726	0.847228	0.224991	Chr3L:69159460-69159660	1.94899	0.224991
Chr3L	70359638	70360139	L_dist_hi_16962	S	Chr3L:70359757-70359957	0.532606	0.287486	Chr3L:70359741-70359941	0.861349	0.287486
Chr3L	70425137	70425638	L_dist_hi_16965	PS	Chr3L:70425211-70425411	1.47647	0.224991	Chr3L:70425228-70425428	0.730832	0.224991
Chr3L	74929939	74930440	L_dist_hi_17045	S	Chr3L:74929840-74930040	0.375295	0.162495	Chr3L:74929849-74930049	0.709079	0.162495
Chr3L	74930406	74930907	L_dist_hi_17046	S	Chr3L:74930621-74930821	0.532606	0.349981	Chr3L:74930596-74930796	2.07951	0.412476
Chr3L	79077983	79078484	L_dist_hi_17137	S	Chr3L:79078219-79078419	0.532606	0.412476	Chr3L:79078129-79078329	0.730832	0.287486
Chr3L	81002109	81002610	L_dist_hi_17168	S	Chr3L:81002169-81002369	0.414622	0.537467	Chr3L:81002213-81002413	1.88373	0.412476
Chr3L	82321127	82321628	L_dist_hi_17196	P	Chr3L:82321291-82321491	0.729245	0.224991	Chr3L:82321278-82321478	0.295776	0.224991
Chr1L	107932943	107933444	L_dist_hi_1723	S	Chr1L:107933336-107933536	0.611261	0.474972	Chr1L:107933210-107933410	1.03537	0.412476
Chr3L	87068085	87068586	L_dist_hi_17272	S	Chr3L:87068363-87068563	0.611261	0.412476	Chr3L:87068381-87068581	0.926608	0.412476
Chr3L	87466022	87466523	L_dist_hi_17288	PS	Chr3L:87466162-87466362	0.965211	0.412476	Chr3L:87466093-87466293	2.34054	0.412476
Chr3L	88154874	88155375	L_dist_hi_17307	P	Chr3L:88154934-88155134	0.571934	0.224991	Chr3L:88155069-88155269	0.40454	0.224991
Chr3L	89508002	89508503	L_dist_hi_17319	S	Chr3L:89507919-89508119	0.375295	0.349981	Chr3L:89508014-89508214	0.709079	0.349981
Chr3L	89522302	89522803	L_dist_hi_17328	PS	Chr3L:89522649-89522849	0.611261	0.162495	Chr3L:89522630-89522830	1.12238	0.162495
Chr1L	108767442	108767943	L_dist_hi_1733	S	Chr1L:108767770-108767970	0.965211	0.537467	Chr1L:108767628-108767828	0.904855	0.287486
Chr3L	90154944	90155445	L_dist_hi_17342	PS	Chr3L:90154854-90155054	1.39782	0.287486	Chr3L:90155055-90155255	2.23178	0.287486
Chr3L	90155528	90156029	L_dist_hi_17343	PS	Chr3L:90155782-90155982	0.768572	0.287486	Chr3L:90155839-90156039	0.991866	0.349981
Chr3L	90159213	90159714	L_dist_hi_17347	PS	Chr3L:90159291-90159491	0.768572	0.287486	Chr3L:90159278-90159478	0.665574	0.287486
Chr1L	108777389	108777890	L_dist_hi_1736	PS	Chr1L:108777587-108777787	0.925884	0.224991	Chr1L:108777616-108777816	0.774338	0.224991
Chr3L	90455997	90456498	L_dist_hi_17360	S	Chr3L:90456188-90456388	0.296639	0.1	Chr3L:90456057-90456257	1.16589	0.1
Chr3L	91398504	91399005	L_dist_hi_17371	PS	Chr3L:91398591-91398791	1.90908	0.349981	Chr3L:91398641-91398841	1.9925	0.412476
Chr1L	108826010	108826511	L_dist_hi_1740	S	Chr1L:108826183-108826383	0.335967	0.412476	Chr1L:108826053-108826253	0.796091	0.287486
Chr3L	96214765	96215266	L_dist_hi_17466	S	Chr3L:96214666-96214866	0.335967	0.162495	Chr3L:96214992-96215192	1.01362	0.224991
Chr3L	97279090	97279591	L_dist_hi_17492	S	Chr3L:97279106-97279306	0.45395	0.287486	Chr3L:97279264-97279464	0.926608	0.224991
Chr3L	98093646	98094147	L_dist_hi_17513	S	Chr3L:98093646-98093846	0.257311	0.224991	Chr3L:98093777-98093977	0.883102	0.287486
Chr3L	98855978	98856479	L_dist_hi_17532	S	Chr3L:98855926-98856126	0.729245	0.412476	Chr3L:98856164-98856364	0.926608	0.1
Chr3L	98927532	98928033	L_dist_hi_17537	S	Chr3L:98927597-98927797	0.45395	0.349981	Chr3L:98927650-98927850	0.730832	0.287486
Chr3L	98938630	98939131	L_dist_hi_17541	S	Chr3L:98938811-98939011	0.729245	0.412476	Chr3L:98938756-98938956	0.883102	0.412476
Chr3L	100267563	100268064	L_dist_hi_17600	S	Chr3L:100267713-100267913	0.45395	0.162495	Chr3L:100267717-100267917	0.926608	0.162495
Chr3L	100761682	100762183	L_dist_hi_17625	PS	Chr3L:100761786-100761986	1.04387	0.162495	Chr3L:100761779-100761979	1.20939	0.162495
Chr3L	101671726	101672227	L_dist_hi_17642	S	Chr3L:101671963-101672163	0.571934	0.287486	Chr3L:101672103-101672303	1.18764	0.162495
Chr3L	102248487	102248988	L_dist_hi_17661	S	Chr3L:102248802-102249002	0.493278	0.224991	Chr3L:102248573-102248773	1.23115	0.412476
Chr3L	103965255	103965756	L_dist_hi_17691	PS	Chr3L:103965214-103965414	0.965211	0.287486	Chr3L:103965348-103965548	0.926608	0.287486
Chr3L	103965638	103966139	L_dist_hi_17692	S	Chr3L:103965616-103965816	0.650589	0.349981	Chr3L:103965686-103965886	1.03537	0.474972
Chr3L	103966974	103967475	L_dist_hi_17695	P	Chr3L:103967168-103967368	0.847228	0.349981	Chr3L:103967131-103967331	0.665574	0.349981
Chr3L	103970617	103971118	L_dist_hi_17697	S	Chr3L:103970558-103970758	0.45395	0.287486	Chr3L:103970855-103971055	1.20939	0.349981
Chr3L	103970818	103971319	L_dist_hi_17698	S	Chr3L:103970980-103971180	0.45395	0.537467	Chr3L:103970855-103971055	1.20939	0.349981
Chr3L	105331871	105332372	L_dist_hi_17728	PS	Chr3L:105332120-105332320	0.886556	0.287486	Chr3L:105332024-105332224	2.31879	0.349981
Chr3L	105704382	105704883	L_dist_hi_17743	S	Chr3L:105704358-105704558	0.532606	0.349981	Chr3L:105704382-105704582	0.948361	0.412476
Chr3L	105969002	105969503	L_dist_hi_17753	PS	Chr3L:105969225-105969425	0.965211	0.224991	Chr3L:105969241-105969441	1.29641	0.224991
Chr3L	106289936	106290437	L_dist_hi_17758	PS	Chr3L:106290009-106290209	0.571934	0.224991	Chr3L:106290147-106290347	0.665574	0.1
Chr3L	107108469	107108970	L_dist_hi_17767	PS	Chr3L:107108726-107108926	0.886556	0.349981	Chr3L:107108639-107108839	1.42692	0.474972
Chr3L	107108966	107109467	L_dist_hi_17768	PS	Chr3L:107108867-107109067	0.650589	0.287486	Chr3L:107108867-107109067	1.33991	0.287486
Chr3L	107198184	107198685	L_dist_hi_17775	PS	Chr3L:107198401-107198601	0.729245	0.162495	Chr3L:107198542-107198742	1.57919	0.224991
Chr3L	107726661	107727162	L_dist_hi_17790	S	Chr3L:107726770-107726970	0.611261	0.412476	Chr3L:107726727-107726927	1.31816	0.412476
Chr1L	111179792	111180293	L_dist_hi_1781	PS	Chr1L:111179805-111180005	1.5158	0.224991	Chr1L:111179956-111180156	2.66683	0.224991
Chr1L	111181594	111182095	L_dist_hi_1782	PS	Chr1L:111181660-111181860	1.27983	0.412476	Chr1L:111181741-111181941	1.12238	0.474972
Chr3L	108724941	108725442	L_dist_hi_17828	S	Chr3L:108725125-108725325	0.45395	0.1	Chr3L:108725100-108725300	1.05712	0.1
Chr3L	108909272	108909773	L_dist_hi_17831	PS	Chr3L:108909462-108909662	0.532606	0.224991	Chr3L:108909522-108909722	1.16589	0.287486
Chr3L	108978207	108978708	L_dist_hi_17835	S	Chr3L:108978214-108978414	0.925884	0.474972	Chr3L:108978397-108978597	2.18827	0.287486
Chr3L	108978514	108979015	L_dist_hi_17836	PS	Chr3L:108978514-108978714	1.08319	0.287486	Chr3L:108978415-108978615	1.9925	0.349981
Chr1L	111213725	111214226	L_dist_hi_1784	S	Chr1L:111213905-111214105	0.886556	0.474972	Chr1L:111213856-111214056	1.55744	0.349981
Chr3L	109259638	109260139	L_dist_hi_17848	S	Chr3L:109259698-109259898	0.335967	0.412476	Chr3L:109259906-109260106	0.861349	0.412476
Chr3L	109260963	109261464	L_dist_hi_17849	PS	Chr3L:109261028-109261228	1.20118	0.412476	Chr3L:109261068-109261268	1.79672	0.474972
Chr3L	109787515	109788016	L_dist_hi_17861	PS	Chr3L:109787591-109787791	0.532606	0.162495	Chr3L:109787619-109787819	0.709079	0.1
Chr3L	110323637	110324138	L_dist_hi_17874	P	Chr3L:110323682-110323882	0.611261	0.224991	Chr3L:110323767-110323967	0.382787	0.287486
Chr1L	111444627	111445128	L_dist_hi_1789	PS	Chr1L:111444638-111444838	0.611261	0.287486	Chr1L:111444835-111445035	1.84023	0.287486
Chr3L	110963246	110963747	L_dist_hi_17902	S	Chr3L:110963393-110963593	0.414622	0.287486	Chr3L:110963405-110963605	1.10063	0.287486
Chr3L	110967451	110967952	L_dist_hi_17903	S	Chr3L:110967597-110967797	0.886556	0.537467	Chr3L:110967554-110967754	1.88373	0.537467
Chr3L	111768755	111769256	L_dist_hi_17923	S	Chr3L:111768848-111769048	0.375295	0.1	Chr3L:111769043-111769243	0.55681	0.1
Chr3L	111771695	111772196	L_dist_hi_17924	PS	Chr3L:111771701-111771901	0.611261	0.287486	Chr3L:111771773-111771973	0.861349	0.287486
Chr3L	113657312	113657813	L_dist_hi_17989	PS	Chr3L:113657488-113657688	0.847228	0.162495	Chr3L:113657520-113657720	1.47043	0.162495
Chr3L	114095404	114095905	L_dist_hi_18001	PS	Chr3L:114095612-114095812	1.08319	0.287486	Chr3L:114095645-114095845	0.643821	0.224991
Chr3L	114325682	114326183	L_dist_hi_18005	S	Chr3L:114325682-114325882	0.335967	0.287486	Chr3L:114325744-114325944	0.904855	0.287486
Chr3L	114797992	114798493	L_dist_hi_18022	S	Chr3L:114798126-114798326	0.729245	0.599962	Chr3L:114798231-114798431	1.64445	0.537467
Chr3L	115157255	115157756	L_dist_hi_18039	S	Chr3L:115157255-115157455	0.414622	0.162495	Chr3L:115157491-115157691	0.665574	0.224991
Chr3L	115157903	115158404	L_dist_hi_18040	P	Chr3L:115158099-115158299	0.729245	0.162495	Chr3L:115158154-115158354	0.491551	0.1
Chr3L	115158609	115159110	L_dist_hi_18041	S	Chr3L:115158776-115158976	0.493278	0.224991	Chr3L:115158763-115158963	0.55681	0.224991
Chr3L	115158918	115159419	L_dist_hi_18042	S	Chr3L:115159079-115159279	0.257311	0.224991	Chr3L:115158819-115159019	0.578562	0.224991
Chr3L	115210424	115210925	L_dist_hi_18047	S	Chr3L:115210794-115210994	0.296639	0.162495	Chr3L:115210498-115210698	0.622068	0.1
Chr3L	115280156	115280657	L_dist_hi_18053	P	Chr3L:115280513-115280713	0.532606	0.224991	Chr3L:115280439-115280639	0.448045	0.287486
Chr1L	112688444	112688945	L_dist_hi_1810	S	Chr1L:112688345-112688545	0.335967	0.349981	Chr1L:112688430-112688630	1.10063	0.349981
Chr3L	118657141	118657642	L_dist_hi_18107	S	Chr3L:118657042-118657242	0.414622	0.287486	Chr3L:118657214-118657414	0.883102	0.162495
Chr1L	112765894	112766395	L_dist_hi_1811	PS	Chr1L:112766003-112766203	1.08319	0.162495	Chr1L:112766245-112766445	0.839596	0.162495
Chr3L	119482840	119483341	L_dist_hi_18119	PS	Chr3L:119482880-119483080	1.20118	0.224991	Chr3L:119483013-119483213	0.578562	0.224991
Chr1L	112793570	112794071	L_dist_hi_1812	S	Chr1L:112793617-112793817	0.493278	0.349981	Chr1L:112793743-112793943	1.38342	0.474972
Chr3L	121184995	121185496	L_dist_hi_18152	S	Chr3L:121185188-121185388	0.296639	0.224991	Chr3L:121185085-121185285	0.535057	0.224991
Chr3L	123679212	123679713	L_dist_hi_18223	S	Chr3L:123679212-123679412	0.729245	0.599962	Chr3L:123679595-123679795	1.53569	0.162495
Chr3L	123679583	123680084	L_dist_hi_18224	PS	Chr3L:123679720-123679920	0.650589	0.162495	Chr3L:123679667-123679867	1.6662	0.162495
Chr3L	124513172	124513673	L_dist_hi_18255	S	Chr3L:124513085-124513285	0.257311	0.1	Chr3L:124513432-124513632	0.55681	0.224991
Chr3L	125087786	125088287	L_dist_hi_18287	PS	Chr3L:125088059-125088259	1.00454	0.412476	Chr3L:125088023-125088223	1.44868	0.412476
Chr3L	125404862	125405363	L_dist_hi_18295	PS	Chr3L:125405155-125405355	1.16185	0.349981	Chr3L:125405093-125405293	1.47043	0.474972
Chr3L	128330617	128331118	L_dist_hi_18331	PS	Chr3L:128330801-128331001	0.571934	0.224991	Chr3L:128330813-128331013	2.55807	0.224991
Chr3L	128879642	128880143	L_dist_hi_18347	PS	Chr3L:128879810-128880010	0.571934	0.162495	Chr3L:128879782-128879982	1.6227	0.224991
Chr1L	114076861	114077362	L_dist_hi_1835	S	Chr1L:114076905-114077105	0.611261	0.412476	Chr1L:114076884-114077084	1.64445	0.349981
Chr3L	129992875	129993376	L_dist_hi_18376	S	Chr3L:129993004-129993204	0.493278	0.412476	Chr3L:129993158-129993358	1.05712	0.349981
Chr3L	133477042	133477543	L_dist_hi_18467	S	Chr3L:133477404-133477604	0.296639	0.224991	Chr3L:133477136-133477336	0.904855	0.162495
Chr3L	133477296	133477797	L_dist_hi_18468	S	Chr3L:133477404-133477604	0.296639	0.224991	Chr3L:133477271-133477471	0.665574	0.162495
Chr3L	134879247	134879748	L_dist_hi_18546	S	Chr3L:134879413-134879613	0.493278	0.474972	Chr3L:134879410-134879610	1.36166	0.474972
Chr3L	135326828	135327329	L_dist_hi_18571	P	Chr3L:135326993-135327193	0.768572	0.287486	Chr3L:135326933-135327133	0.361034	0.287486
Chr3L	135631853	135632354	L_dist_hi_18578	S	Chr3L:135632015-135632215	0.532606	0.287486	Chr3L:135631995-135632195	1.38342	0.349981
Chr3L	138390509	138391010	L_dist_hi_18665	S	Chr3L:138390770-138390970	0.729245	0.412476	Chr3L:138390739-138390939	0.904855	0.412476
Chr3L	138396860	138397361	L_dist_hi_18668	S	Chr3L:138396924-138397124	0.650589	0.349981	Chr3L:138396924-138397124	1.47043	0.349981
Chr3L	139414735	139415236	L_dist_hi_18692	S	Chr3L:139414645-139414845	0.335967	0.224991	Chr3L:139414852-139415052	0.817844	0.224991
Chr3L	141613147	141613648	L_dist_hi_18751	PS	Chr3L:141613048-141613248	0.571934	0.162495	Chr3L:141613148-141613348	1.23115	0.162495
Chr3L	142046218	142046719	L_dist_hi_18780	S	Chr3L:142046417-142046617	0.257311	0.349981	Chr3L:142046370-142046570	1.42692	0.287486
Chr3L	142151645	142152146	L_dist_hi_18792	P	Chr3L:142151716-142151916	0.571934	0.162495	Chr3L:142151822-142152022	0.317528	0.162495
Chr3L	142227182	142227683	L_dist_hi_18798	S	Chr3L:142227267-142227467	0.493278	0.412476	Chr3L:142227190-142227390	0.730832	0.349981
Chr3L	144001768	144002269	L_dist_hi_18844	PS	Chr3L:144001889-144002089	0.532606	0.162495	Chr3L:144001859-144002059	0.622068	0.162495
Chr3L	144005701	144006202	L_dist_hi_18846	PS	Chr3L:144005820-144006020	0.886556	0.162495	Chr3L:144005839-144006039	2.10126	0.162495
Chr3L	144175130	144175631	L_dist_hi_18858	PS	Chr3L:144175211-144175411	1.04387	0.412476	Chr3L:144175130-144175330	1.18764	0.537467
Chr1L	117299360	117299861	L_dist_hi_1886	S	Chr1L:117299560-117299760	0.375295	0.349981	Chr1L:117299414-117299614	0.535057	0.224991
Chr3L	144960340	144960841	L_dist_hi_18877	PS	Chr3L:144960400-144960600	1.16185	0.162495	Chr3L:144960709-144960909	0.883102	0.287486
Chr3L	145603793	145604294	L_dist_hi_18970	S	Chr3L:145603988-145604188	0.493278	0.287486	Chr3L:145603944-145604144	0.883102	0.287486
Chr1L	117672286	117672787	L_dist_hi_1898	S	Chr1L:117672286-117672486	0.217983	0.224991	Chr1L:117672316-117672516	0.665574	0.224991
Chr3L	146628163	146628664	L_dist_hi_18993	S	Chr3L:146628270-146628470	0.296639	0.287486	Chr3L:146628190-146628390	0.687327	0.287486
Chr3L	147584044	147584545	L_dist_hi_19024	S	Chr3L:147584076-147584276	0.375295	0.1	Chr3L:147584168-147584368	0.709079	0.162495
Chr3L	148813497	148813998	L_dist_hi_19097	S	Chr3L:148813827-148814027	0.493278	0.224991	Chr3L:148813710-148813910	1.84023	0.412476
Chr1L	118329535	118330036	L_dist_hi_1912	S	Chr1L:118329570-118329770	0.45395	0.224991	Chr1L:118329648-118329848	0.578562	0.287486
Chr3L	150116718	150117219	L_dist_hi_19171	PS	Chr3L:150116824-150117024	0.571934	0.1	Chr3L:150116906-150117106	1.47043	0.224991
Chr3L	150881057	150881558	L_dist_hi_19238	PS	Chr3L:150881368-150881568	0.8079	0.287486	Chr3L:150881211-150881411	2.71034	0.162495
Chr3L	150882402	150882903	L_dist_hi_19239	S	Chr3L:150882781-150882981	0.335967	0.287486	Chr3L:150882430-150882630	2.27528	0.349981
Chr3L	150899624	150900125	L_dist_hi_19250	PS	Chr3L:150899770-150899970	1.08319	0.412476	Chr3L:150899792-150899992	1.01362	0.412476
Chr3L	150900183	150900684	L_dist_hi_19251	P	Chr3L:150900490-150900690	0.768572	0.224991	Chr3L:150900419-150900619	0.426293	0.224991
Chr3L	150900835	150901336	L_dist_hi_19252	PS	Chr3L:150900736-150900936	0.571934	0.224991	Chr3L:150900736-150900936	0.578562	0.224991
Chr3L	151255218	151255719	L_dist_hi_19264	S	Chr3L:151255377-151255577	0.532606	0.412476	Chr3L:151255412-151255612	0.709079	0.349981
Chr3L	151260701	151261202	L_dist_hi_19267	P	Chr3L:151260649-151260849	0.532606	0.1	Chr3L:151260645-151260845	0.448045	0.1
Chr3L	151462775	151463276	L_dist_hi_19277	S	Chr3L:151462909-151463109	0.335967	0.162495	Chr3L:151462926-151463126	0.513304	0.162495
Chr3L	151941278	151941779	L_dist_hi_19290	PS	Chr3L:151941455-151941655	0.532606	0.224991	Chr3L:151941398-151941598	0.535057	0.224991
Chr3L	152320027	152320528	L_dist_hi_19294	P	Chr3L:152320196-152320396	1.24051	0.162495	Chr3L:152320306-152320506	0.382787	0.287486
Chr3L	153355031	153355532	L_dist_hi_19355	PS	Chr3L:153355423-153355623	0.532606	0.162495	Chr3L:153355401-153355601	1.01362	0.162495
Chr3L	153362907	153363408	L_dist_hi_19357	PS	Chr3L:153363161-153363361	1.27983	0.412476	Chr3L:153362918-153363118	2.05776	0.287486
Chr3L	153363916	153364417	L_dist_hi_19358	PS	Chr3L:153363916-153364116	1.86975	0.412476	Chr3L:153363933-153364133	2.36229	0.474972
Chr3L	153366949	153367450	L_dist_hi_19362	PS	Chr3L:153367077-153367277	1.12252	0.224991	Chr3L:153367014-153367214	2.16652	0.224991
Chr3L	153370433	153370934	L_dist_hi_19363	PS	Chr3L:153370567-153370767	0.886556	0.287486	Chr3L:153370439-153370639	1.81847	0.224991
Chr3L	153375517	153376018	L_dist_hi_19367	S	Chr3L:153375771-153375971	0.493278	0.287486	Chr3L:153375664-153375864	1.6227	0.287486
Chr3L	153407661	153408162	L_dist_hi_19376	PS	Chr3L:153407883-153408083	0.689917	0.162495	Chr3L:153407895-153408095	1.92724	0.224991
Chr3L	153408970	153409471	L_dist_hi_19379	PS	Chr3L:153409158-153409358	1.63378	0.474972	Chr3L:153409165-153409365	3.972	0.474972
Chr1L	119763264	119763765	L_dist_hi_1939	PS	Chr1L:119763495-119763695	0.650589	0.224991	Chr1L:119763422-119763622	2.68859	0.224991
Chr3L	155388379	155388880	L_dist_hi_19454	P	Chr3L:155388523-155388723	0.768572	0.349981	Chr3L:155388508-155388708	0.643821	0.349981
Chr1L	120908773	120909274	L_dist_hi_1952	PS	Chr1L:120908857-120909057	1.75177	0.412476	Chr1L:120908850-120909050	2.99313	0.412476
Chr3L	158477262	158477763	L_dist_hi_19530	P	Chr3L:158477635-158477835	0.611261	0.162495	Chr3L:158477356-158477556	0.295776	0.349981
Chr3L	159845642	159846143	L_dist_hi_19648	PS	Chr3L:159845760-159845960	1.31916	0.287486	Chr3L:159845837-159846037	3.27591	0.412476
Chr3L	159850261	159850762	L_dist_hi_19650	S	Chr3L:159850652-159850852	0.335967	0.1	Chr3L:159850285-159850485	1.10063	0.287486
Chr3L	161163245	161163746	L_dist_hi_19731	P	Chr3L:161163375-161163575	0.925884	0.162495	Chr3L:161163375-161163575	0.40454	0.162495
Chr1L	122267189	122267690	L_dist_hi_1979	PS	Chr1L:122267369-122267569	0.729245	0.287486	Chr1L:122267329-122267529	1.94899	0.287486
Chr1L	122752308	122752809	L_dist_hi_1992	S	Chr1L:122752471-122752671	0.375295	0.287486	Chr1L:122752517-122752717	0.665574	0.287486
Chr1L	122759933	122760434	L_dist_hi_1995	PS	Chr1L:122760037-122760237	0.611261	0.287486	Chr1L:122760037-122760237	0.796091	0.287486
Chr1L	123086754	123087255	L_dist_hi_2002	S	Chr1L:123086819-123087019	0.493278	0.287486	Chr1L:123086898-123087098	1.79672	0.287486
Chr1L	123505611	123506112	L_dist_hi_2013	S	Chr1L:123505738-123505938	0.650589	0.412476	Chr1L:123505743-123505943	0.752585	0.349981
Chr1L	123518381	123518882	L_dist_hi_2015	S	Chr1L:123518572-123518772	0.493278	0.224991	Chr1L:123518451-123518651	1.49218	0.349981
Chr1L	123520443	123520944	L_dist_hi_2016	S	Chr1L:123520643-123520843	0.650589	0.474972	Chr1L:123520689-123520889	1.44868	0.474972
Chr1L	123612315	123612816	L_dist_hi_2024	S	Chr1L:123612385-123612585	0.335967	0.412476	Chr1L:123612707-123612907	1.05712	0.349981
Chr1L	123612611	123613112	L_dist_hi_2025	S	Chr1L:123612692-123612892	0.296639	0.287486	Chr1L:123612963-123613163	1.2529	0.287486
Chr1L	124318429	124318930	L_dist_hi_2039	S	Chr1L:124318825-124319025	0.257311	0.224991	Chr1L:124318650-124318850	0.622068	0.224991
Chr1L	124319133	124319634	L_dist_hi_2040	S	Chr1L:124319217-124319417	0.296639	0.349981	Chr1L:124319034-124319234	1.01362	0.349981
Chr1L	124663846	124664347	L_dist_hi_2048	PS	Chr1L:124663976-124664176	1.55513	0.287486	Chr1L:124663986-124664186	1.60095	0.224991
Chr1L	130627380	130627881	L_dist_hi_2122	PS	Chr1L:130627563-130627763	0.571934	0.224991	Chr1L:130627577-130627777	0.513304	0.224991
Chr1L	139690070	139690571	L_dist_hi_2249	PS	Chr1L:139690203-139690403	0.650589	0.224991	Chr1L:139690271-139690471	1.49218	0.224991
Chr1L	139722355	139722856	L_dist_hi_2254	S	Chr1L:139722461-139722661	0.375295	0.224991	Chr1L:139722495-139722695	0.643821	0.224991
Chr1L	141108969	141109470	L_dist_hi_2279	S	Chr1L:141108870-141109070	0.414622	0.224991	Chr1L:141109141-141109341	0.535057	0.162495
Chr1L	11105953	11106454	L_dist_hi_228	PS	Chr1L:11106287-11106487	0.886556	0.349981	Chr1L:11106300-11106500	1.01362	0.349981
Chr1L	11106221	11106722	L_dist_hi_229	PS	Chr1L:11106287-11106487	0.886556	0.349981	Chr1L:11106391-11106591	1.14414	0.162495
Chr4L	3634826	3635327	L_dist_hi_22952	S	Chr4L:3634826-3635026	0.296639	0.224991	Chr4L:3634951-3635151	0.665574	0.287486
Chr1L	11108800	11109301	L_dist_hi_230	S	Chr1L:11108838-11109038	0.414622	0.287486	Chr1L:11108912-11109112	1.47043	0.349981
Chr4L	4821901	4822402	L_dist_hi_23009	S	Chr4L:4822052-4822252	0.493278	0.349981	Chr4L:4822162-4822362	1.68796	0.349981
Chr1L	143100978	143101479	L_dist_hi_2303	PS	Chr1L:143101228-143101428	1.00454	0.412476	Chr1L:143101114-143101314	3.75448	0.537467
Chr4L	9853795	9854296	L_dist_hi_23173	S	Chr4L:9854018-9854218	0.257311	0.162495	Chr4L:9853822-9854022	0.948361	0.224991
Chr4L	10356467	10356968	L_dist_hi_23203	P	Chr4L:10356691-10356891	0.571934	0.162495	Chr4L:10356641-10356841	0.448045	0.224991
Chr4L	12061055	12061556	L_dist_hi_23257	S	Chr4L:12061129-12061329	0.414622	0.162495	Chr4L:12060956-12061156	0.709079	0.224991
Chr4L	13842374	13842875	L_dist_hi_23295	S	Chr4L:13842383-13842583	0.375295	0.224991	Chr4L:13842552-13842752	0.752585	0.162495
Chr4L	14144878	14145379	L_dist_hi_23298	PS	Chr4L:14144937-14145137	0.532606	0.224991	Chr4L:14144938-14145138	0.752585	0.224991
Chr4L	14196431	14196932	L_dist_hi_23299	S	Chr4L:14196520-14196720	0.493278	0.162495	Chr4L:14196622-14196822	0.730832	0.224991
Chr4L	14274429	14274930	L_dist_hi_23300	S	Chr4L:14274330-14274530	0.217983	0.162495	Chr4L:14274553-14274753	0.513304	0.162495
Chr4L	16004454	16004955	L_dist_hi_23328	S	Chr4L:16004563-16004763	0.414622	0.224991	Chr4L:16004637-16004837	1.23115	0.224991
Chr1L	11112038	11112539	L_dist_hi_234	S	Chr1L:11112266-11112466	0.414622	0.224991	Chr1L:11112234-11112434	1.23115	0.224991
Chr1L	145269189	145269690	L_dist_hi_2346	S	Chr1L:145269502-145269702	0.414622	0.287486	Chr1L:145269099-145269299	0.643821	0.224991
Chr1L	145269810	145270311	L_dist_hi_2347	PS	Chr1L:145269712-145269912	0.571934	0.224991	Chr1L:145270101-145270301	0.774338	0.162495
Chr4L	25578079	25578580	L_dist_hi_23479	PS	Chr4L:25578176-25578376	1.63378	0.224991	Chr4L:25578176-25578376	3.12364	0.224991
Chr4L	25668239	25668740	L_dist_hi_23483	S	Chr4L:25668563-25668763	0.414622	0.412476	Chr4L:25668481-25668681	1.27465	0.537467
Chr4L	25668446	25668947	L_dist_hi_23484	S	Chr4L:25668563-25668763	0.414622	0.412476	Chr4L:25668481-25668681	1.27465	0.537467
Chr4L	25846463	25846964	L_dist_hi_23486	PS	Chr4L:25846714-25846914	0.925884	0.412476	Chr4L:25846388-25846588	1.01362	0.349981
Chr1L	11114895	11115396	L_dist_hi_235	PS	Chr1L:11114979-11115179	0.768572	0.287486	Chr1L:11115048-11115248	1.75322	0.287486
Chr1L	145273621	145274122	L_dist_hi_2351	PS	Chr1L:145273849-145274049	2.02706	0.349981	Chr1L:145273679-145273879	3.12364	0.412476
Chr4L	26509475	26509976	L_dist_hi_23516	PS	Chr4L:26509665-26509865	1.5158	0.162495	Chr4L:26509446-26509646	2.25353	0.162495
Chr1L	145277003	145277504	L_dist_hi_2353	PS	Chr1L:145277314-145277514	0.847228	0.162495	Chr1L:145277176-145277376	1.36166	0.287486
Chr1L	145277447	145277948	L_dist_hi_2354	PS	Chr1L:145277515-145277715	0.965211	0.349981	Chr1L:145277620-145277820	1.73146	0.349981
Chr4L	27819375	27819876	L_dist_hi_23551	S	Chr4L:27819408-27819608	0.257311	0.224991	Chr4L:27819575-27819775	1.49218	0.412476
Chr4L	29151005	29151506	L_dist_hi_23593	S	Chr4L:29151234-29151434	0.8079	0.412476	Chr4L:29151159-29151359	0.796091	0.349981
Chr4L	29930772	29931273	L_dist_hi_23623	S	Chr4L:29930772-29930972	0.611261	0.349981	Chr4L:29931006-29931206	3.47169	0.412476
Chr4L	30342053	30342554	L_dist_hi_23632	S	Chr4L:30342242-30342442	0.375295	0.287486	Chr4L:30342374-30342574	1.44868	0.349981
Chr4L	33473742	33474243	L_dist_hi_23666	PS	Chr4L:33473652-33473852	0.729245	0.349981	Chr4L:33473799-33473999	1.12238	0.224991
Chr4L	34592974	34593475	L_dist_hi_23674	S	Chr4L:34592884-34593084	0.493278	0.287486	Chr4L:34593115-34593315	0.861349	0.1
Chr4L	35541621	35542122	L_dist_hi_23685	PS	Chr4L:35541746-35541946	0.925884	0.162495	Chr4L:35541822-35542022	1.03537	0.224991
Chr4L	35761458	35761959	L_dist_hi_23693	PS	Chr4L:35761597-35761797	0.571934	0.224991	Chr4L:35761598-35761798	0.709079	0.224991
Chr4L	36383210	36383711	L_dist_hi_23696	PS	Chr4L:36383595-36383795	0.571934	0.162495	Chr4L:36383436-36383636	0.883102	0.162495
Chr4L	40801222	40801723	L_dist_hi_23735	S	Chr4L:40801248-40801448	0.571934	0.287486	Chr4L:40801432-40801632	1.60095	0.287486
Chr4L	40848086	40848587	L_dist_hi_23736	PS	Chr4L:40848101-40848301	1.98773	0.474972	Chr4L:40848178-40848378	1.14414	0.474972
Chr4L	41503630	41504131	L_dist_hi_23745	S	Chr4L:41503695-41503895	0.45395	0.224991	Chr4L:41503772-41503972	0.948361	0.162495
Chr4L	42593010	42593511	L_dist_hi_23753	P	Chr4L:42593023-42593223	0.611261	0.287486	Chr4L:42593032-42593232	0.448045	0.287486
Chr1L	146385483	146385984	L_dist_hi_2378	PS	Chr1L:146385712-146385912	0.847228	0.224991	Chr1L:146385672-146385872	1.57919	0.224991
Chr4L	44688689	44689190	L_dist_hi_23788	PS	Chr4L:44688882-44689082	2.38101	0.349981	Chr4L:44688871-44689071	0.730832	0.349981
Chr1L	146385770	146386271	L_dist_hi_2379	PS	Chr1L:146385712-146385912	0.847228	0.224991	Chr1L:146385672-146385872	1.57919	0.224991
Chr1L	146386578	146387079	L_dist_hi_2380	PS	Chr1L:146386667-146386867	1.75177	0.287486	Chr1L:146386687-146386887	3.31942	0.224991
Chr4L	50825753	50826254	L_dist_hi_23820	S	Chr4L:50825654-50825854	0.335967	0.224991	Chr4L:50825847-50826047	0.752585	0.162495
Chr4L	52759655	52760156	L_dist_hi_23863	PS	Chr4L:52759833-52760033	0.729245	0.287486	Chr4L:52759942-52760142	0.817844	0.349981
Chr4L	55380451	55380952	L_dist_hi_23904	PS	Chr4L:55380352-55380552	0.729245	0.224991	Chr4L:55380526-55380726	1.79672	0.349981
Chr4L	58372819	58373320	L_dist_hi_23936	PS	Chr4L:58372884-58373084	0.611261	0.1	Chr4L:58372955-58373155	0.600315	0.162495
Chr4L	59170736	59171237	L_dist_hi_23950	S	Chr4L:59171071-59171271	0.335967	0.224991	Chr4L:59170889-59171089	1.44868	0.287486
Chr4L	59865731	59866232	L_dist_hi_23968	S	Chr4L:59866090-59866290	0.493278	0.349981	Chr4L:59865873-59866073	1.33991	0.349981
Chr4L	59875987	59876488	L_dist_hi_23972	PS	Chr4L:59876279-59876479	0.689917	0.287486	Chr4L:59876333-59876533	1.33991	0.224991
Chr4L	60693787	60694288	L_dist_hi_23980	S	Chr4L:60694044-60694244	0.45395	0.412476	Chr4L:60693928-60694128	1.6662	0.412476
Chr4L	60850660	60851161	L_dist_hi_23984	PS	Chr4L:60850813-60851013	0.965211	0.162495	Chr4L:60850952-60851152	0.578562	0.224991
Chr4L	61296418	61296919	L_dist_hi_23988	P	Chr4L:61296523-61296723	0.532606	0.162495	Chr4L:61296319-61296519	0.361034	0.287486
Chr4L	64086846	64087347	L_dist_hi_24022	S	Chr4L:64086747-64086947	0.178656	0.162495	Chr4L:64086912-64087112	0.970113	0.224991
Chr1L	147308555	147309056	L_dist_hi_2407	PS	Chr1L:147308628-147308828	1.27983	0.412476	Chr1L:147308660-147308860	1.73146	0.474972
Chr4L	66444904	66445405	L_dist_hi_24072	P	Chr4L:66445285-66445485	0.650589	0.224991	Chr4L:66445112-66445312	0.448045	0.162495
Chr4L	66677653	66678154	L_dist_hi_24076	PS	Chr4L:66677934-66678134	0.689917	0.224991	Chr4L:66677907-66678107	0.817844	0.224991
Chr4L	69428129	69428630	L_dist_hi_24126	PS	Chr4L:69428406-69428606	1.31916	0.349981	Chr4L:69428340-69428540	1.94899	0.412476
Chr1L	147532757	147533258	L_dist_hi_2413	PS	Chr1L:147532658-147532858	1.12252	0.349981	Chr1L:147532746-147532946	3.08014	0.412476
Chr4L	69881421	69881922	L_dist_hi_24135	PS	Chr4L:69881521-69881721	0.768572	0.162495	Chr4L:69881545-69881745	1.12238	0.162495
Chr4L	69894999	69895500	L_dist_hi_24136	S	Chr4L:69895342-69895542	0.493278	0.412476	Chr4L:69895066-69895266	1.05712	0.287486
Chr1L	147533329	147533830	L_dist_hi_2414	S	Chr1L:147533334-147533534	0.571934	0.287486	Chr1L:147533446-147533646	0.709079	0.224991
Chr1L	147537012	147537513	L_dist_hi_2415	PS	Chr1L:147537122-147537322	1.04387	0.349981	Chr1L:147537408-147537608	1.51393	0.349981
Chr1L	147537800	147538301	L_dist_hi_2416	PS	Chr1L:147537710-147537910	1.63378	0.349981	Chr1L:147537701-147537901	3.1454	0.349981
Chr4L	71884180	71884681	L_dist_hi_24186	PS	Chr4L:71884323-71884523	0.965211	0.224991	Chr4L:71884292-71884492	1.57919	0.224991
Chr1L	147547585	147548086	L_dist_hi_2420	S	Chr1L:147547701-147547901	0.414622	0.412476	Chr1L:147547767-147547967	0.948361	0.349981
Chr4L	78099991	78100492	L_dist_hi_24264	PS	Chr4L:78099892-78100092	0.729245	0.287486	Chr4L:78099901-78100101	1.10063	0.287486
Chr4L	78204074	78204575	L_dist_hi_24270	PS	Chr4L:78204468-78204668	1.04387	0.474972	Chr4L:78204473-78204673	1.40517	0.474972
Chr4L	78204469	78204970	L_dist_hi_24271	S	Chr4L:78204604-78204804	1.16185	0.662457	Chr4L:78204607-78204807	1.64445	0.662457
Chr4L	78208778	78209279	L_dist_hi_24274	S	Chr4L:78208874-78209074	0.45395	0.412476	Chr4L:78208897-78209097	1.51393	0.474972
Chr4L	78225573	78226074	L_dist_hi_24276	S	Chr4L:78225856-78226056	0.257311	0.1	Chr4L:78225715-78225915	0.709079	0.224991
Chr4L	78547297	78547798	L_dist_hi_24286	S	Chr4L:78547297-78547497	0.414622	0.349981	Chr4L:78547364-78547564	0.796091	0.287486
Chr4L	79627092	79627593	L_dist_hi_24303	PS	Chr4L:79627250-79627450	1.00454	0.287486	Chr4L:79627166-79627366	1.90549	0.287486
Chr4L	79790392	79790893	L_dist_hi_24308	PS	Chr4L:79790558-79790758	1.08319	0.287486	Chr4L:79790552-79790752	0.970113	0.287486
Chr4L	79888101	79888602	L_dist_hi_24318	S	Chr4L:79888321-79888521	0.493278	0.474972	Chr4L:79888498-79888698	1.40517	0.474972
Chr4L	80802768	80803269	L_dist_hi_24334	S	Chr4L:80802951-80803151	0.532606	0.287486	Chr4L:80802918-80803118	0.709079	0.287486
Chr4L	82339790	82340291	L_dist_hi_24350	PS	Chr4L:82339989-82340189	1.04387	0.349981	Chr4L:82339914-82340114	1.60095	0.349981
Chr4L	82449406	82449907	L_dist_hi_24359	P	Chr4L:82449410-82449610	0.689917	0.224991	Chr4L:82449627-82449827	1.20939	0.662457
Chr1L	149143710	149144211	L_dist_hi_2445	S	Chr1L:149143873-149144073	0.650589	0.349981	Chr1L:149143932-149144132	0.796091	0.287486
Chr4L	86674435	86674936	L_dist_hi_24461	PS	Chr4L:86674543-86674743	1.27983	0.349981	Chr4L:86674559-86674759	2.92787	0.349981
Chr4L	86675828	86676329	L_dist_hi_24462	S	Chr4L:86676066-86676266	0.532606	0.349981	Chr4L:86676205-86676405	0.904855	0.287486
Chr4L	86676612	86677113	L_dist_hi_24463	PS	Chr4L:86676726-86676926	0.650589	0.162495	Chr4L:86676764-86676964	1.38342	0.224991
Chr4L	86677451	86677952	L_dist_hi_24464	PS	Chr4L:86677378-86677578	1.31916	0.349981	Chr4L:86677554-86677754	2.23178	0.287486
Chr4L	86685492	86685993	L_dist_hi_24465	S	Chr4L:86685804-86686004	0.45395	0.287486	Chr4L:86685882-86686082	0.970113	0.349981
Chr1L	149144718	149145219	L_dist_hi_2447	S	Chr1L:149144684-149144884	0.335967	0.412476	Chr1L:149144678-149144878	0.926608	0.412476
Chr1L	149145174	149145675	L_dist_hi_2448	PS	Chr1L:149145392-149145592	0.8079	0.224991	Chr1L:149145230-149145430	1.88373	0.287486
Chr1L	149147908	149148409	L_dist_hi_2449	PS	Chr1L:149148048-149148248	0.611261	0.224991	Chr1L:149147976-149148176	0.622068	0.287486
Chr4L	89137449	89137950	L_dist_hi_24521	S	Chr4L:89137849-89138049	0.335967	0.349981	Chr4L:89137600-89137800	0.665574	0.287486
Chr4L	89390155	89390656	L_dist_hi_24523	S	Chr4L:89390297-89390497	0.414622	0.474972	Chr4L:89390322-89390522	1.03537	0.474972
Chr1L	149152973	149153474	L_dist_hi_2453	S	Chr1L:149153361-149153561	0.45395	0.412476	Chr1L:149152973-149153173	0.643821	0.287486
Chr4L	91060705	91061206	L_dist_hi_24535	P	Chr4L:91060606-91060806	0.532606	0.162495	Chr4L:91060747-91060947	0.382787	0.287486
Chr4L	91237797	91238298	L_dist_hi_24540	S	Chr4L:91237893-91238093	0.414622	0.287486	Chr4L:91237861-91238061	0.774338	0.287486
Chr4L	91966808	91967309	L_dist_hi_24580	PS	Chr4L:91966932-91967132	0.571934	0.1	Chr4L:91966801-91967001	0.904855	0.287486
Chr4L	92004161	92004662	L_dist_hi_24590	PS	Chr4L:92004161-92004361	0.886556	0.224991	Chr4L:92004238-92004438	0.535057	0.162495
Chr4L	92565658	92566159	L_dist_hi_24602	S	Chr4L:92565776-92565976	0.257311	0.287486	Chr4L:92565766-92565966	1.20939	0.287486
Chr4L	92911017	92911518	L_dist_hi_24623	PS	Chr4L:92911167-92911367	0.729245	0.287486	Chr4L:92911144-92911344	0.600315	0.287486
Chr4L	92920936	92921437	L_dist_hi_24629	P	Chr4L:92920985-92921185	0.611261	0.162495	Chr4L:92921217-92921417	0.55681	0.287486
Chr4L	93180754	93181255	L_dist_hi_24643	PS	Chr4L:93180979-93181179	0.886556	0.412476	Chr4L:93180925-93181125	1.03537	0.412476
Chr4L	95206999	95207500	L_dist_hi_24668	S	Chr4L:95207268-95207468	0.45395	0.287486	Chr4L:95207131-95207331	0.883102	0.287486
Chr4L	96582995	96583496	L_dist_hi_24699	PS	Chr4L:96583057-96583257	1.35849	0.287486	Chr4L:96582995-96583195	1.90549	0.287486
Chr4L	96583427	96583928	L_dist_hi_24700	S	Chr4L:96583468-96583668	0.335967	0.412476	Chr4L:96583367-96583567	0.839596	0.287486
Chr4L	97513079	97513580	L_dist_hi_24739	S	Chr4L:97513355-97513555	0.45395	0.349981	Chr4L:97513271-97513471	1.23115	0.349981
Chr4L	99842079	99842580	L_dist_hi_24765	S	Chr4L:99842096-99842296	0.45395	0.474972	Chr4L:99842288-99842488	1.2529	0.349981
Chr4L	100478282	100478783	L_dist_hi_24792	S	Chr4L:100478407-100478607	0.45395	0.162495	Chr4L:100478278-100478478	0.643821	0.224991
Chr4L	100728323	100728824	L_dist_hi_24799	S	Chr4L:100728529-100728729	0.493278	0.224991	Chr4L:100728574-100728774	1.10063	0.287486
Chr4L	101026780	101027281	L_dist_hi_24803	S	Chr4L:101026693-101026893	0.296639	0.412476	Chr4L:101026948-101027148	0.926608	0.287486
Chr4L	101221949	101222450	L_dist_hi_24804	PS	Chr4L:101221962-101222162	0.8079	0.224991	Chr4L:101222003-101222203	1.2529	0.224991
Chr4L	101477306	101477807	L_dist_hi_24811	PS	Chr4L:101477335-101477535	0.689917	0.162495	Chr4L:101477329-101477529	0.709079	0.162495
Chr4L	101601387	101601888	L_dist_hi_24814	PS	Chr4L:101601288-101601488	0.925884	0.1	Chr4L:101601288-101601488	1.36166	0.1
Chr1L	150469222	150469723	L_dist_hi_2489	PS	Chr1L:150469123-150469323	0.729245	0.224991	Chr1L:150469282-150469482	0.839596	0.287486
Chr4L	107870284	107870785	L_dist_hi_24915	PS	Chr4L:107870353-107870553	0.689917	0.224991	Chr4L:107870385-107870585	1.42692	0.349981
Chr4L	108021832	108022333	L_dist_hi_24920	S	Chr4L:108021832-108022032	0.296639	0.162495	Chr4L:108021986-108022186	0.600315	0.1
Chr4L	108749321	108749822	L_dist_hi_24937	PS	Chr4L:108749533-108749733	1.43714	0.287486	Chr4L:108749488-108749688	2.88436	0.224991
Chr4L	110293971	110294472	L_dist_hi_24944	S	Chr4L:110294163-110294363	0.375295	0.162495	Chr4L:110294266-110294466	0.926608	0.1
Chr4L	110929440	110929941	L_dist_hi_24962	S	Chr4L:110929457-110929657	0.217983	0.412476	Chr4L:110929792-110929992	1.16589	0.474972
Chr4L	112241877	112242378	L_dist_hi_25009	PS	Chr4L:112241778-112241978	0.925884	0.224991	Chr4L:112241828-112242028	0.861349	0.224991
Chr4L	112621370	112621871	L_dist_hi_25029	PS	Chr4L:112621549-112621749	1.39782	0.162495	Chr4L:112621535-112621735	2.10126	0.162495
Chr4L	112694972	112695473	L_dist_hi_25032	S	Chr4L:112694972-112695172	0.45395	0.349981	Chr4L:112694940-112695140	0.861349	0.349981
Chr4L	112809420	112809921	L_dist_hi_25045	PS	Chr4L:112809420-112809620	1.39782	0.474972	Chr4L:112809420-112809620	1.84023	0.474972
Chr4L	112809946	112810447	L_dist_hi_25046	S	Chr4L:112809847-112810047	0.532606	0.287486	Chr4L:112809847-112810047	0.861349	0.287486
Chr4L	113016801	113017302	L_dist_hi_25052	S	Chr4L:113016872-113017072	0.571934	0.287486	Chr4L:113016956-113017156	0.948361	0.287486
Chr4L	113523039	113523540	L_dist_hi_25080	PS	Chr4L:113523182-113523382	0.965211	0.224991	Chr4L:113523182-113523382	2.25353	0.224991
Chr4L	115361398	115361899	L_dist_hi_25087	PS	Chr4L:115361683-115361883	0.965211	0.349981	Chr4L:115361686-115361886	1.40517	0.349981
Chr4L	116914695	116915196	L_dist_hi_25122	S	Chr4L:116914981-116915181	0.493278	0.287486	Chr4L:116914862-116915062	0.904855	0.287486
Chr4L	116915642	116916143	L_dist_hi_25124	PS	Chr4L:116916031-116916231	0.886556	0.349981	Chr4L:116916033-116916233	1.86198	0.349981
Chr4L	116916534	116917035	L_dist_hi_25126	PS	Chr4L:116916435-116916635	0.965211	0.349981	Chr4L:116916435-116916635	2.036	0.349981
Chr4L	116934259	116934760	L_dist_hi_25127	S	Chr4L:116934268-116934468	0.571934	0.474972	Chr4L:116934353-116934553	0.709079	0.349981
Chr4L	118641103	118641604	L_dist_hi_25169	PS	Chr4L:118641285-118641485	1.08319	0.474972	Chr4L:118641065-118641265	3.03663	0.474972
Chr1L	151013262	151013763	L_dist_hi_2517	S	Chr1L:151013459-151013659	0.650589	0.349981	Chr1L:151013409-151013609	1.14414	0.349981
Chr4L	118714587	118715088	L_dist_hi_25174	S	Chr4L:118714614-118714814	0.45395	0.224991	Chr4L:118714674-118714874	0.752585	0.349981
Chr4L	119144564	119145065	L_dist_hi_25192	PS	Chr4L:119144676-119144876	0.571934	0.162495	Chr4L:119144640-119144840	1.40517	0.162495
Chr4L	119410516	119411017	L_dist_hi_25194	S	Chr4L:119410459-119410659	0.493278	0.412476	Chr4L:119410819-119411019	0.535057	0.224991
Chr4L	119518287	119518788	L_dist_hi_25198	S	Chr4L:119518442-119518642	0.375295	0.1	Chr4L:119518580-119518780	1.12238	0.162495
Chr4L	121355183	121355684	L_dist_hi_25260	S	Chr4L:121355491-121355691	0.375295	0.287486	Chr4L:121355453-121355653	0.796091	0.224991
Chr4L	125528960	125529461	L_dist_hi_25377	S	Chr4L:125528872-125529072	0.571934	0.349981	Chr4L:125529058-125529258	1.31816	0.349981
Chr4L	125568010	125568511	L_dist_hi_25387	PS	Chr4L:125568096-125568296	2.42034	0.537467	Chr4L:125568198-125568398	4.12427	0.412476
Chr4L	126073972	126074473	L_dist_hi_25404	S	Chr4L:126074210-126074410	0.335967	0.224991	Chr4L:126074210-126074410	0.578562	0.224991
Chr1L	151558855	151559356	L_dist_hi_2541	S	Chr1L:151558855-151559055	0.375295	0.287486	Chr1L:151558873-151559073	1.03537	0.287486
Chr4L	127715950	127716451	L_dist_hi_25467	PS	Chr4L:127716321-127716521	1.12252	0.287486	Chr4L:127716230-127716430	1.40517	0.349981
Chr4L	127720473	127720974	L_dist_hi_25469	S	Chr4L:127720601-127720801	0.493278	0.412476	Chr4L:127720591-127720791	1.05712	0.412476
Chr1L	151672387	151672888	L_dist_hi_2549	PS	Chr1L:151672497-151672697	0.689917	0.287486	Chr1L:151672518-151672718	1.97074	0.287486
Chr4L	129139407	129139908	L_dist_hi_25494	S	Chr4L:129139707-129139907	0.375295	0.162495	Chr4L:129139535-129139735	0.55681	0.224991
Chr4L	132227486	132227987	L_dist_hi_25572	PS	Chr4L:132227570-132227770	0.965211	0.474972	Chr4L:132227521-132227721	0.970113	0.474972
Chr1L	153894937	153895438	L_dist_hi_2559	S	Chr1L:153895084-153895284	0.493278	0.162495	Chr1L:153895098-153895298	0.709079	0.1
Chr4L	133094204	133094705	L_dist_hi_25604	S	Chr4L:133094508-133094708	0.375295	0.162495	Chr4L:133094468-133094668	0.513304	0.162495
Chr4L	135288011	135288512	L_dist_hi_25643	PS	Chr4L:135288271-135288471	0.8079	0.287486	Chr4L:135288203-135288403	1.75322	0.287486
Chr4L	135484491	135484992	L_dist_hi_25664	PS	Chr4L:135484831-135485031	0.886556	0.287486	Chr4L:135484883-135485083	1.47043	0.287486
Chr4L	135682273	135682774	L_dist_hi_25674	S	Chr4L:135682426-135682626	0.414622	0.287486	Chr4L:135682456-135682656	0.926608	0.287486
Chr4L	136719259	136719760	L_dist_hi_25698	S	Chr4L:136719538-136719738	0.689917	0.349981	Chr4L:136719406-136719606	1.33991	0.349981
Chr4L	137524748	137525249	L_dist_hi_25742	PS	Chr4L:137524842-137525042	2.14505	0.287486	Chr4L:137524877-137525077	3.16715	0.412476
Chr4L	137554210	137554711	L_dist_hi_25745	PS	Chr4L:137554111-137554311	1.39782	0.287486	Chr4L:137554138-137554338	1.6662	0.287486
Chr4L	139345206	139345707	L_dist_hi_25794	PS	Chr4L:139345364-139345564	1.71244	0.474972	Chr4L:139345378-139345578	4.60284	0.474972
Chr4L	139370448	139370949	L_dist_hi_25800	PS	Chr4L:139370544-139370744	0.886556	0.287486	Chr4L:139370582-139370782	1.47043	0.287486
Chr4L	139828153	139828654	L_dist_hi_25819	PS	Chr4L:139828266-139828466	0.571934	0.224991	Chr4L:139828352-139828552	0.535057	0.224991
Chr4L	143948951	143949452	L_dist_hi_25908	PS	Chr4L:143949106-143949306	0.532606	0.162495	Chr4L:143949106-143949306	0.817844	0.162495
Chr4L	146182946	146183447	L_dist_hi_25951	PS	Chr4L:146183339-146183539	1.35849	0.412476	Chr4L:146183201-146183401	1.60095	0.474972
Chr4L	146912613	146913114	L_dist_hi_25971	S	Chr4L:146912533-146912733	0.375295	0.474972	Chr4L:146912758-146912958	1.14414	0.224991
Chr1L	155447210	155447711	L_dist_hi_2601	PS	Chr1L:155447349-155447549	2.38101	0.224991	Chr1L:155447355-155447555	3.36293	0.224991
Chr4L	149627197	149627698	L_dist_hi_26012	S	Chr4L:149627406-149627606	0.532606	0.287486	Chr4L:149627098-149627298	0.600315	0.224991
Chr4L	150357142	150357643	L_dist_hi_26051	PS	Chr4L:150357176-150357376	0.768572	0.287486	Chr4L:150357198-150357398	1.29641	0.287486
Chr1L	155528380	155528881	L_dist_hi_2609	S	Chr1L:155528618-155528818	0.571934	0.599962	Chr1L:155528623-155528823	1.55744	0.537467
Chr1L	155654769	155655270	L_dist_hi_2612	PS	Chr1L:155655128-155655328	1.7911	0.1	Chr1L:155655160-155655360	2.38405	0.1
Chr1L	155655066	155655567	L_dist_hi_2613	PS	Chr1L:155655128-155655328	1.7911	0.1	Chr1L:155655175-155655375	2.34054	0.1
Chr4L	153899113	153899614	L_dist_hi_26159	PS	Chr4L:153899254-153899454	0.650589	0.162495	Chr4L:153899175-153899375	1.27465	0.162495
Chr4L	154068167	154068668	L_dist_hi_26181	S	Chr4L:154068287-154068487	0.493278	0.162495	Chr4L:154068343-154068543	0.948361	0.162495
Chr4L	154070593	154071094	L_dist_hi_26182	S	Chr4L:154070700-154070900	0.45395	0.349981	Chr4L:154070974-154071174	1.27465	0.349981
Chr4L	154071952	154072453	L_dist_hi_26183	PS	Chr4L:154071938-154072138	1.00454	0.1	Chr4L:154072052-154072252	1.05712	0.1
Chr1L	156898907	156899408	L_dist_hi_2671	S	Chr1L:156898988-156899188	0.414622	0.224991	Chr1L:156898976-156899176	0.752585	0.224991
Chr1L	157004852	157005353	L_dist_hi_2678	S	Chr1L:157005083-157005283	0.925884	0.537467	Chr1L:157004998-157005198	3.75448	0.474972
Chr1L	157006819	157007320	L_dist_hi_2679	PS	Chr1L:157006916-157007116	1.39782	0.162495	Chr1L:157006800-157007000	4.90738	0.224991
Chr1L	157064035	157064536	L_dist_hi_2680	PS	Chr1L:157064189-157064389	1.24051	0.287486	Chr1L:157064226-157064426	2.23178	0.349981
Chr1L	157693938	157694439	L_dist_hi_2699	S	Chr1L:157694037-157694237	0.335967	0.224991	Chr1L:157693860-157694060	0.600315	0.162495
Chr1L	158119468	158119969	L_dist_hi_2724	PS	Chr1L:158119610-158119810	1.20118	0.1	Chr1L:158119549-158119749	2.29704	0.162495
Chr1L	158123368	158123869	L_dist_hi_2728	PS	Chr1L:158123563-158123763	1.31916	0.349981	Chr1L:158123570-158123770	2.31879	0.349981
Chr1L	159029375	159029876	L_dist_hi_2766	S	Chr1L:159029285-159029485	0.257311	0.287486	Chr1L:159029565-159029765	0.926608	0.349981
Chr1L	159863508	159864009	L_dist_hi_2788	PS	Chr1L:159863508-159863708	0.8079	0.349981	Chr1L:159863734-159863934	0.948361	0.224991
Chr1L	160233500	160234001	L_dist_hi_2800	S	Chr1L:160233713-160233913	0.571934	0.349981	Chr1L:160233690-160233890	1.31816	0.287486
Chr1L	160714125	160714626	L_dist_hi_2802	PS	Chr1L:160714290-160714490	1.00454	0.412476	Chr1L:160714246-160714446	1.81847	0.412476
Chr1L	160952604	160953105	L_dist_hi_2806	S	Chr1L:160952707-160952907	0.532606	0.349981	Chr1L:160952740-160952940	0.774338	0.287486
Chr1L	12426921	12427422	L_dist_hi_281	S	Chr1L:12427047-12427247	0.45395	0.224991	Chr1L:12427085-12427285	1.64445	0.162495
Chr1L	162254576	162255077	L_dist_hi_2812	S	Chr1L:162254813-162255013	0.493278	0.287486	Chr1L:162254904-162255104	1.14414	0.349981
Chr1L	162477761	162478262	L_dist_hi_2816	S	Chr1L:162477769-162477969	0.414622	0.224991	Chr1L:162477766-162477966	0.513304	0.224991
Chr5L	52573	53074	L_dist_hi_29020	P	Chr5L:52578-52778	0.571934	0.224991	Chr5L:52739-52939	0.448045	0.224991
Chr5L	5498619	5499120	L_dist_hi_29197	S	Chr5L:5498870-5499070	0.847228	0.537467	Chr5L:5498730-5498930	3.53695	0.474972
Chr5L	7619118	7619619	L_dist_hi_29258	S	Chr5L:7619204-7619404	0.375295	0.349981	Chr5L:7619278-7619478	1.68796	0.412476
Chr5L	8555892	8556393	L_dist_hi_29273	S	Chr5L:8555977-8556177	0.257311	0.224991	Chr5L:8556038-8556238	0.535057	0.224991
Chr5L	8556682	8557183	L_dist_hi_29274	S	Chr5L:8556887-8557087	0.257311	0.287486	Chr5L:8557083-8557283	1.2529	0.287486
Chr5L	8556936	8557437	L_dist_hi_29275	PS	Chr5L:8557237-8557437	0.611261	0.224991	Chr5L:8557175-8557375	1.49218	0.224991
Chr5L	8632795	8633296	L_dist_hi_29288	S	Chr5L:8632696-8632896	0.257311	0.349981	Chr5L:8633025-8633225	0.55681	0.1
Chr5L	8637166	8637667	L_dist_hi_29290	PS	Chr5L:8637297-8637497	0.847228	0.412476	Chr5L:8637327-8637527	1.70971	0.349981
Chr5L	8725099	8725600	L_dist_hi_29295	PS	Chr5L:8725352-8725552	0.925884	0.349981	Chr5L:8725250-8725450	1.86198	0.349981
Chr5L	8725354	8725855	L_dist_hi_29296	PS	Chr5L:8725540-8725740	1.20118	0.349981	Chr5L:8725556-8725756	1.81847	0.349981
Chr5L	8725858	8726359	L_dist_hi_29297	S	Chr5L:8726001-8726201	0.493278	0.349981	Chr5L:8726004-8726204	0.730832	0.349981
Chr5L	8728080	8728581	L_dist_hi_29299	PS	Chr5L:8728096-8728296	0.847228	0.162495	Chr5L:8728323-8728523	1.70971	0.412476
Chr5L	8730327	8730828	L_dist_hi_29301	S	Chr5L:8730565-8730765	0.414622	0.474972	Chr5L:8730284-8730484	1.64445	0.349981
Chr5L	9465095	9465596	L_dist_hi_29308	S	Chr5L:9465193-9465393	0.375295	0.349981	Chr5L:9465057-9465257	1.29641	0.287486
Chr5L	9538843	9539344	L_dist_hi_29315	S	Chr5L:9539219-9539419	0.689917	0.349981	Chr5L:9539230-9539430	2.036	0.349981
Chr5L	9542118	9542619	L_dist_hi_29317	S	Chr5L:9542275-9542475	0.532606	0.287486	Chr5L:9542368-9542568	0.904855	0.349981
Chr1L	165654197	165654698	L_dist_hi_2939	P	Chr1L:165654111-165654311	1.12252	0.412476	Chr1L:165654158-165654358	0.600315	0.537467
Chr5L	17874381	17874882	L_dist_hi_29506	PS	Chr5L:17874484-17874684	0.650589	0.162495	Chr5L:17874482-17874682	1.2529	0.162495
Chr5L	17922679	17923180	L_dist_hi_29516	S	Chr5L:17922580-17922780	0.296639	0.599962	Chr5L:17922871-17923071	0.622068	0.162495
Chr5L	17964725	17965226	L_dist_hi_29518	S	Chr5L:17965030-17965230	0.335967	0.287486	Chr5L:17964948-17965148	0.904855	0.224991
Chr5L	17978393	17978894	L_dist_hi_29521	PS	Chr5L:17978553-17978753	0.925884	0.162495	Chr5L:17978665-17978865	3.38468	0.162495
Chr5L	17983099	17983600	L_dist_hi_29522	S	Chr5L:17983430-17983630	0.296639	0.287486	Chr5L:17983191-17983391	2.01425	0.412476
Chr5L	17985806	17986307	L_dist_hi_29524	S	Chr5L:17985806-17986006	0.414622	0.412476	Chr5L:17985731-17985931	1.07888	0.349981
Chr5L	17999520	18000021	L_dist_hi_29529	PS	Chr5L:17999689-17999889	0.8079	0.349981	Chr5L:17999430-17999630	0.883102	0.287486
Chr5L	18003022	18003523	L_dist_hi_29530	PS	Chr5L:18003030-18003230	2.06639	0.599962	Chr5L:18003086-18003286	1.79672	0.599962
Chr5L	21127304	21127805	L_dist_hi_29612	PS	Chr5L:21127532-21127732	0.650589	0.287486	Chr5L:21127446-21127646	1.01362	0.224991
Chr1L	166795432	166795933	L_dist_hi_2977	PS	Chr1L:166795460-166795660	0.532606	0.162495	Chr1L:166795342-166795542	1.79672	0.224991
Chr1L	166834208	166834709	L_dist_hi_2981	S	Chr1L:166834398-166834598	1.16185	0.662457	Chr1L:166834364-166834564	1.90549	0.662457
Chr5L	25091532	25092033	L_dist_hi_29849	P	Chr5L:25091631-25091831	0.729245	0.224991	Chr5L:25091863-25092063	0.491551	0.162495
Chr5L	26991668	26992169	L_dist_hi_29878	PS	Chr5L:26991795-26991995	1.31916	0.287486	Chr5L:26991762-26991962	2.21003	0.287486
Chr5L	28455414	28455915	L_dist_hi_29888	S	Chr5L:28455576-28455776	0.414622	0.537467	Chr5L:28455481-28455681	1.01362	0.412476
Chr5L	29941507	29942008	L_dist_hi_29904	S	Chr5L:29941671-29941871	0.45395	0.287486	Chr5L:29941673-29941873	0.600315	0.287486
Chr5L	30086568	30087069	L_dist_hi_29912	S	Chr5L:30086748-30086948	0.729245	0.412476	Chr5L:30086678-30086878	0.730832	0.349981
Chr5L	31687932	31688433	L_dist_hi_29962	S	Chr5L:31687833-31688033	0.45395	0.224991	Chr5L:31688193-31688393	0.817844	0.162495
Chr5L	32129497	32129998	L_dist_hi_29974	PS	Chr5L:32129777-32129977	0.729245	0.349981	Chr5L:32129770-32129970	1.2529	0.349981
Chr5L	32131876	32132377	L_dist_hi_29975	S	Chr5L:32132072-32132272	0.493278	0.287486	Chr5L:32132091-32132291	1.12238	0.287486
Chr5L	32350325	32350826	L_dist_hi_29992	PS	Chr5L:32350552-32350752	0.965211	0.224991	Chr5L:32350416-32350616	1.68796	0.287486
Chr1L	167000002	167000503	L_dist_hi_3000	S	Chr1L:167000136-167000336	0.45395	0.287486	Chr1L:167000143-167000343	0.817844	0.287486
Chr1L	167001223	167001724	L_dist_hi_3001	S	Chr1L:167001153-167001353	0.414622	0.1	Chr1L:167001291-167001491	1.05712	0.287486
Chr5L	34376336	34376837	L_dist_hi_30012	PS	Chr5L:34376474-34376674	0.768572	0.224991	Chr5L:34376551-34376751	0.730832	0.287486
Chr5L	34842409	34842910	L_dist_hi_30020	PS	Chr5L:34842653-34842853	0.925884	0.224991	Chr5L:34842484-34842684	0.991866	0.349981
Chr5L	35355388	35355889	L_dist_hi_30030	S	Chr5L:35355740-35355940	0.493278	0.287486	Chr5L:35355641-35355841	0.709079	0.287486
Chr5L	35367588	35368089	L_dist_hi_30032	S	Chr5L:35367968-35368168	0.335967	0.349981	Chr5L:35367636-35367836	0.643821	0.162495
Chr5L	35371695	35372196	L_dist_hi_30033	S	Chr5L:35371803-35372003	0.335967	0.224991	Chr5L:35371759-35371959	0.55681	0.224991
Chr1L	167004495	167004996	L_dist_hi_3005	S	Chr1L:167004804-167005004	0.493278	0.287486	Chr1L:167004448-167004648	1.40517	0.412476
Chr5L	38413692	38414193	L_dist_hi_30076	PS	Chr5L:38413636-38413836	0.847228	0.412476	Chr5L:38413897-38414097	1.03537	0.412476
Chr1L	167010580	167011081	L_dist_hi_3008	S	Chr1L:167010833-167011033	0.493278	0.224991	Chr1L:167010492-167010692	0.904855	0.349981
Chr5L	38661601	38662102	L_dist_hi_30085	S	Chr5L:38661755-38661955	0.493278	0.287486	Chr5L:38661748-38661948	0.948361	0.287486
Chr1L	167015000	167015501	L_dist_hi_3011	P	Chr1L:167015400-167015600	0.532606	0.1	Chr1L:167015129-167015329	0.274023	0.724953
Chr1L	167015578	167016079	L_dist_hi_3012	PS	Chr1L:167015685-167015885	0.689917	0.287486	Chr1L:167015710-167015910	0.904855	0.287486
Chr5L	42604719	42605220	L_dist_hi_30137	PS	Chr5L:42604911-42605111	1.00454	0.224991	Chr5L:42604911-42605111	1.79672	0.224991
Chr5L	44842131	44842632	L_dist_hi_30169	S	Chr5L:44842076-44842276	0.45395	0.224991	Chr5L:44842411-44842611	0.817844	0.224991
Chr5L	44883178	44883679	L_dist_hi_30173	P	Chr5L:44883365-44883565	0.689917	0.287486	Chr5L:44883577-44883777	0.730832	0.412476
Chr5L	47490966	47491467	L_dist_hi_30213	S	Chr5L:47491258-47491458	0.493278	0.349981	Chr5L:47491122-47491322	1.01362	0.349981
Chr5L	51458601	51459102	L_dist_hi_30243	PS	Chr5L:51458709-51458909	0.886556	0.412476	Chr5L:51458670-51458870	2.01425	0.412476
Chr5L	51465220	51465721	L_dist_hi_30245	S	Chr5L:51465352-51465552	0.296639	0.224991	Chr5L:51465583-51465783	0.796091	0.287486
Chr5L	51465580	51466081	L_dist_hi_30246	S	Chr5L:51465670-51465870	0.689917	0.412476	Chr5L:51465686-51465886	0.991866	0.412476
Chr5L	51591129	51591630	L_dist_hi_30248	S	Chr5L:51591309-51591509	0.493278	0.349981	Chr5L:51591189-51591389	1.70971	0.412476
Chr1L	167266347	167266848	L_dist_hi_3030	PS	Chr1L:167266368-167266568	0.650589	0.224991	Chr1L:167266443-167266643	0.643821	0.162495
Chr5L	54839366	54839867	L_dist_hi_30303	S	Chr5L:54839686-54839886	0.45395	0.224991	Chr5L:54839613-54839813	1.64445	0.287486
Chr5L	59289632	59290133	L_dist_hi_30348	PS	Chr5L:59289861-59290061	0.729245	0.287486	Chr5L:59289879-59290079	0.643821	0.287486
Chr5L	59968533	59969034	L_dist_hi_30357	PS	Chr5L:59968746-59968946	1.08319	0.162495	Chr5L:59968687-59968887	1.51393	0.162495
Chr5L	60538724	60539225	L_dist_hi_30364	PS	Chr5L:60539094-60539294	0.689917	0.162495	Chr5L:60538873-60539073	1.75322	0.162495
Chr5L	63280619	63281120	L_dist_hi_30378	PS	Chr5L:63280619-63280819	1.16185	0.349981	Chr5L:63280619-63280819	1.05712	0.349981
Chr5L	63862501	63863002	L_dist_hi_30380	PS	Chr5L:63862607-63862807	2.38101	0.162495	Chr5L:63862619-63862819	1.97074	0.162495
Chr5L	65689761	65690262	L_dist_hi_30393	S	Chr5L:65689997-65690197	0.493278	0.412476	Chr5L:65689973-65690173	1.29641	0.412476
Chr5L	74079150	74079651	L_dist_hi_30450	PS	Chr5L:74079449-74079649	1.04387	0.349981	Chr5L:74079444-74079644	1.01362	0.349981
Chr5L	79258594	79259095	L_dist_hi_30506	S	Chr5L:79258649-79258849	0.335967	0.224991	Chr5L:79258906-79259106	0.774338	0.162495
Chr5L	79261543	79262044	L_dist_hi_30509	S	Chr5L:79261595-79261795	0.886556	0.537467	Chr5L:79261601-79261801	1.86198	0.537467
Chr1L	167723863	167724364	L_dist_hi_3053	PS	Chr1L:167723997-167724197	0.8079	0.287486	Chr1L:167723893-167724093	1.2529	0.162495
Chr5L	81838202	81838703	L_dist_hi_30536	PS	Chr5L:81838202-81838402	0.571934	0.224991	Chr5L:81838258-81838458	0.687327	0.287486
Chr5L	83153686	83154187	L_dist_hi_30557	PS	Chr5L:83153897-83154097	0.768572	0.287486	Chr5L:83153932-83154132	2.62333	0.224991
Chr5L	83156823	83157324	L_dist_hi_30560	S	Chr5L:83157137-83157337	1.04387	0.599962	Chr5L:83157128-83157328	2.12301	0.599962
Chr5L	83638688	83639189	L_dist_hi_30566	PS	Chr5L:83638918-83639118	1.5158	0.224991	Chr5L:83638810-83639010	2.38405	0.162495
Chr5L	83652172	83652673	L_dist_hi_30567	S	Chr5L:83652254-83652454	0.768572	0.537467	Chr5L:83652213-83652413	1.55744	0.599962
Chr5L	83653000	83653501	L_dist_hi_30568	S	Chr5L:83653073-83653273	0.493278	0.349981	Chr5L:83653236-83653436	0.687327	0.287486
Chr5L	83653167	83653668	L_dist_hi_30569	S	Chr5L:83653077-83653277	0.493278	0.349981	Chr5L:83653236-83653436	0.687327	0.287486
Chr5L	83655156	83655657	L_dist_hi_30570	PS	Chr5L:83655066-83655266	0.729245	0.224991	Chr5L:83655278-83655478	0.883102	0.349981
Chr5L	83655801	83656302	L_dist_hi_30571	PS	Chr5L:83655807-83656007	0.611261	0.224991	Chr5L:83655870-83656070	1.14414	0.287486
Chr5L	84070818	84071319	L_dist_hi_30577	PS	Chr5L:84071025-84071225	0.650589	0.224991	Chr5L:84071004-84071204	0.774338	0.224991
Chr5L	85861818	85862319	L_dist_hi_30600	P	Chr5L:85861810-85862010	0.965211	0.287486	Chr5L:85861875-85862075	0.469798	0.224991
Chr5L	86016782	86017283	L_dist_hi_30604	S	Chr5L:86016792-86016992	0.611261	0.537467	Chr5L:86016782-86016982	1.01362	0.474972
Chr5L	86026806	86027307	L_dist_hi_30612	S	Chr5L:86027061-86027261	0.650589	0.474972	Chr5L:86027043-86027243	1.64445	0.474972
Chr5L	88249945	88250446	L_dist_hi_30628	S	Chr5L:88249846-88250046	0.414622	0.412476	Chr5L:88250067-88250267	0.622068	0.224991
Chr5L	88344023	88344524	L_dist_hi_30629	S	Chr5L:88344213-88344413	0.414622	0.1	Chr5L:88344221-88344421	0.578562	0.1
Chr1L	167917660	167918161	L_dist_hi_3065	P	Chr1L:167917769-167917969	0.650589	0.224991	Chr1L:167917837-167918037	0.469798	0.349981
Chr5L	91369013	91369514	L_dist_hi_30668	S	Chr5L:91369120-91369320	0.335967	0.412476	Chr5L:91369381-91369581	1.55744	0.287486
Chr1L	167925628	167926129	L_dist_hi_3071	S	Chr1L:167925639-167925839	0.493278	0.349981	Chr1L:167925529-167925729	0.709079	0.349981
Chr1L	167926291	167926792	L_dist_hi_3072	S	Chr1L:167926527-167926727	0.335967	0.224991	Chr1L:167926394-167926594	0.796091	0.224991
Chr1L	167930806	167931307	L_dist_hi_3074	S	Chr1L:167930940-167931140	0.571934	0.287486	Chr1L:167930883-167931083	0.752585	0.224991
Chr5L	100418017	100418518	L_dist_hi_30770	S	Chr5L:100418373-100418573	0.414622	0.412476	Chr5L:100418292-100418492	0.883102	0.412476
Chr5L	101304977	101305478	L_dist_hi_30784	PS	Chr5L:101305156-101305356	1.27983	0.412476	Chr5L:101305093-101305293	1.07888	0.412476
Chr5L	101306010	101306511	L_dist_hi_30786	S	Chr5L:101306212-101306412	0.45395	0.162495	Chr5L:101306198-101306398	0.578562	0.162495
Chr1L	168305048	168305549	L_dist_hi_3082	PS	Chr1L:168305361-168305561	0.925884	0.412476	Chr1L:168305443-168305643	1.81847	0.412476
Chr5L	105613019	105613520	L_dist_hi_30852	S	Chr5L:105613178-105613378	0.335967	0.162495	Chr5L:105613243-105613443	0.752585	0.224991
Chr5L	107505398	107505899	L_dist_hi_30881	S	Chr5L:107505345-107505545	0.296639	0.224991	Chr5L:107505619-107505819	0.730832	0.162495
Chr5L	107657660	107658161	L_dist_hi_30888	S	Chr5L:107657867-107658067	0.296639	0.412476	Chr5L:107658048-107658248	0.513304	0.224991
Chr5L	107657814	107658315	L_dist_hi_30889	S	Chr5L:107657867-107658067	0.296639	0.412476	Chr5L:107658048-107658248	0.513304	0.224991
Chr5L	107658161	107658662	L_dist_hi_30890	S	Chr5L:107658386-107658586	0.375295	0.287486	Chr5L:107658367-107658567	0.687327	0.287486
Chr5L	109068106	109068607	L_dist_hi_30907	PS	Chr5L:109068173-109068373	0.8079	0.287486	Chr5L:109068229-109068429	1.75322	0.224991
Chr5L	109071689	109072190	L_dist_hi_30908	S	Chr5L:109071599-109071799	0.493278	0.162495	Chr5L:109071966-109072166	1.38342	0.224991
Chr5L	111417800	111418301	L_dist_hi_30939	PS	Chr5L:111417886-111418086	0.8079	0.349981	Chr5L:111417947-111418147	2.25353	0.224991
Chr5L	112904557	112905058	L_dist_hi_30961	S	Chr5L:112904629-112904829	0.335967	0.287486	Chr5L:112904954-112905154	0.861349	0.224991
Chr5L	113277035	113277536	L_dist_hi_30983	S	Chr5L:113277161-113277361	0.335967	0.287486	Chr5L:113277245-113277445	0.904855	0.287486
Chr5L	113549885	113550386	L_dist_hi_30989	PS	Chr5L:113550010-113550210	0.886556	0.287486	Chr5L:113550006-113550206	0.687327	0.287486
Chr5L	113833882	113834383	L_dist_hi_30995	PS	Chr5L:113833950-113834150	1.00454	0.287486	Chr5L:113833953-113834153	1.23115	0.287486
Chr5L	113847763	113848264	L_dist_hi_30997	PS	Chr5L:113847785-113847985	0.571934	0.224991	Chr5L:113847789-113847989	1.77497	0.224991
Chr5L	113867410	113867911	L_dist_hi_31004	P	Chr5L:113867605-113867805	0.611261	0.224991	Chr5L:113867773-113867973	0.469798	0.224991
Chr5L	114095194	114095695	L_dist_hi_31009	PS	Chr5L:114095245-114095445	2.69563	0.224991	Chr5L:114095271-114095471	0.839596	0.224991
Chr5L	114199436	114199937	L_dist_hi_31010	PS	Chr5L:114199643-114199843	1.20118	0.224991	Chr5L:114199547-114199747	1.6662	0.287486
Chr5L	114408526	114409027	L_dist_hi_31013	S	Chr5L:114408703-114408903	0.45395	0.412476	Chr5L:114408598-114408798	1.03537	0.349981
Chr5L	114816996	114817497	L_dist_hi_31020	PS	Chr5L:114816998-114817198	1.27983	0.287486	Chr5L:114817227-114817427	2.25353	0.162495
Chr5L	114961597	114962098	L_dist_hi_31029	S	Chr5L:114961628-114961828	0.414622	0.287486	Chr5L:114961700-114961900	0.926608	0.287486
Chr5L	114963308	114963809	L_dist_hi_31030	P	Chr5L:114963542-114963742	0.965211	0.412476	Chr5L:114963583-114963783	0.926608	0.537467
Chr5L	114973523	114974024	L_dist_hi_31037	S	Chr5L:114973538-114973738	0.414622	0.349981	Chr5L:114973703-114973903	1.01362	0.349981
Chr5L	115766794	115767295	L_dist_hi_31051	S	Chr5L:115766911-115767111	0.571934	0.287486	Chr5L:115766958-115767158	0.839596	0.224991
Chr5L	116185188	116185689	L_dist_hi_31070	S	Chr5L:116185574-116185774	0.335967	0.474972	Chr5L:116185534-116185734	0.839596	0.412476
Chr5L	117556147	117556648	L_dist_hi_31081	PS	Chr5L:117556312-117556512	2.65631	0.162495	Chr5L:117556208-117556408	1.79672	0.162495
Chr5L	118668807	118669308	L_dist_hi_31099	PS	Chr5L:118668945-118669145	0.729245	0.162495	Chr5L:118668880-118669080	1.07888	0.162495
Chr5L	118827143	118827644	L_dist_hi_31104	PS	Chr5L:118827355-118827555	1.7911	0.349981	Chr5L:118827242-118827442	1.57919	0.412476
Chr5L	118864252	118864753	L_dist_hi_31108	S	Chr5L:118864153-118864353	0.650589	0.412476	Chr5L:118864331-118864531	1.18764	0.474972
Chr5L	122079289	122079790	L_dist_hi_31155	S	Chr5L:122079393-122079593	0.375295	0.287486	Chr5L:122079442-122079642	1.16589	0.412476
Chr5L	123721075	123721576	L_dist_hi_31180	S	Chr5L:123721211-123721411	0.493278	0.287486	Chr5L:123721191-123721391	0.513304	0.224991
Chr5L	124014102	124014603	L_dist_hi_31189	S	Chr5L:124014291-124014491	0.650589	0.537467	Chr5L:124014256-124014456	1.14414	0.474972
Chr5L	124454451	124454952	L_dist_hi_31205	PS	Chr5L:124454549-124454749	0.611261	0.162495	Chr5L:124454481-124454681	0.817844	0.162495
Chr5L	126340916	126341417	L_dist_hi_31233	S	Chr5L:126341230-126341430	0.375295	0.287486	Chr5L:126340931-126341131	0.774338	0.287486
Chr5L	126870515	126871016	L_dist_hi_31250	S	Chr5L:126870687-126870887	0.335967	0.162495	Chr5L:126870694-126870894	0.709079	0.162495
Chr1L	170233892	170234393	L_dist_hi_3128	S	Chr1L:170234221-170234421	0.493278	0.162495	Chr1L:170234100-170234300	0.948361	0.224991
Chr5L	129939374	129939875	L_dist_hi_31295	S	Chr5L:129939427-129939627	0.493278	0.412476	Chr5L:129939500-129939700	1.64445	0.412476
Chr5L	129998126	129998627	L_dist_hi_31308	S	Chr5L:129998307-129998507	0.45395	0.537467	Chr5L:129998376-129998576	1.29641	0.537467
Chr5L	130003077	130003578	L_dist_hi_31310	S	Chr5L:130003077-130003277	0.45395	0.1	Chr5L:130003077-130003277	1.47043	0.1
Chr5L	130004188	130004689	L_dist_hi_31312	PS	Chr5L:130004446-130004646	1.27983	0.162495	Chr5L:130004535-130004735	2.57982	0.224991
Chr5L	130007691	130008192	L_dist_hi_31315	S	Chr5L:130007770-130007970	0.375295	0.224991	Chr5L:130007922-130008122	1.12238	0.224991
Chr5L	130008366	130008867	L_dist_hi_31316	S	Chr5L:130008466-130008666	0.375295	0.349981	Chr5L:130008267-130008467	0.687327	0.224991
Chr5L	130010380	130010881	L_dist_hi_31317	S	Chr5L:130010599-130010799	0.532606	0.287486	Chr5L:130010487-130010687	1.05712	0.1
Chr5L	130080205	130080706	L_dist_hi_31321	PS	Chr5L:130080353-130080553	0.729245	0.162495	Chr5L:130080355-130080555	0.752585	0.162495
Chr5L	130080997	130081498	L_dist_hi_31322	PS	Chr5L:130081147-130081347	1.43714	0.162495	Chr5L:130081147-130081347	2.7756	0.162495
Chr5L	130093441	130093942	L_dist_hi_31323	PS	Chr5L:130093712-130093912	1.75177	0.474972	Chr5L:130093707-130093907	3.1889	0.474972
Chr5L	133591531	133592032	L_dist_hi_31372	S	Chr5L:133591768-133591968	0.335967	0.224991	Chr5L:133591699-133591899	0.839596	0.224991
Chr5L	133797046	133797547	L_dist_hi_31386	S	Chr5L:133797046-133797246	0.532606	0.349981	Chr5L:133797350-133797550	1.6227	0.224991
Chr1L	171427017	171427518	L_dist_hi_3140	PS	Chr1L:171427294-171427494	1.00454	0.162495	Chr1L:171427205-171427405	1.57919	0.162495
Chr5L	134643552	134644053	L_dist_hi_31424	PS	Chr5L:134643792-134643992	1.04387	0.224991	Chr5L:134643916-134644116	1.23115	0.162495
Chr5L	134644023	134644524	L_dist_hi_31425	PS	Chr5L:134643946-134644146	0.847228	0.162495	Chr5L:134644006-134644206	1.20939	0.224991
Chr1L	171848866	171849367	L_dist_hi_3145	PS	Chr1L:171849112-171849312	1.20118	0.412476	Chr1L:171849078-171849278	2.7756	0.412476
Chr5L	135952131	135952632	L_dist_hi_31462	PS	Chr5L:135952283-135952483	1.08319	0.224991	Chr5L:135952371-135952571	2.21003	0.224991
Chr5L	137923101	137923602	L_dist_hi_31502	S	Chr5L:137923002-137923202	0.532606	0.474972	Chr5L:137923189-137923389	0.535057	0.224991
Chr1L	171900641	171901142	L_dist_hi_3151	PS	Chr1L:171901031-171901231	0.847228	0.287486	Chr1L:171900872-171901072	1.2529	0.287486
Chr5L	137964159	137964660	L_dist_hi_31514	S	Chr5L:137964527-137964727	0.296639	0.162495	Chr5L:137964338-137964538	0.730832	0.162495
Chr1L	171902015	171902516	L_dist_hi_3152	S	Chr1L:171902096-171902296	0.493278	0.287486	Chr1L:171902335-171902535	0.861349	0.349981
Chr5L	140963125	140963626	L_dist_hi_31587	S	Chr5L:140963331-140963531	0.45395	0.162495	Chr5L:140963303-140963503	1.10063	0.224991
Chr5L	141143742	141144243	L_dist_hi_31593	S	Chr5L:141144032-141144232	0.414622	0.287486	Chr5L:141143807-141144007	0.796091	0.224991
Chr1L	173000764	173001265	L_dist_hi_3161	S	Chr1L:173001083-173001283	0.768572	0.474972	Chr1L:173000890-173001090	1.03537	0.474972
Chr5L	144181546	144182047	L_dist_hi_31627	PS	Chr5L:144181514-144181714	0.768572	0.224991	Chr5L:144181699-144181899	0.578562	0.224991
Chr5L	144186688	144187189	L_dist_hi_31629	PS	Chr5L:144186699-144186899	1.04387	0.349981	Chr5L:144186785-144186985	1.60095	0.537467
Chr5L	144188533	144189034	L_dist_hi_31631	S	Chr5L:144188879-144189079	0.414622	0.287486	Chr5L:144188914-144189114	0.709079	0.287486
Chr5L	146758557	146759058	L_dist_hi_31668	S	Chr5L:146758839-146759039	0.296639	0.349981	Chr5L:146758657-146758857	0.643821	0.224991
Chr5L	146861137	146861638	L_dist_hi_31677	PS	Chr5L:146861173-146861373	1.71244	0.349981	Chr5L:146861169-146861369	2.90612	0.349981
Chr5L	148172013	148172514	L_dist_hi_31696	S	Chr5L:148171987-148172187	0.375295	0.162495	Chr5L:148172214-148172414	0.513304	0.162495
Chr5L	148173186	148173687	L_dist_hi_31698	S	Chr5L:148173087-148173287	0.532606	0.287486	Chr5L:148173578-148173778	0.839596	0.224991
Chr5L	148786224	148786725	L_dist_hi_31724	S	Chr5L:148786393-148786593	0.611261	0.474972	Chr5L:148786232-148786432	0.774338	0.287486
Chr5L	149043093	149043594	L_dist_hi_31738	S	Chr5L:149043173-149043373	0.689917	0.349981	Chr5L:149043210-149043410	1.14414	0.287486
Chr5L	153521639	153522140	L_dist_hi_31810	S	Chr5L:153521728-153521928	0.375295	0.224991	Chr5L:153521772-153521972	1.12238	0.224991
Chr5L	153522205	153522706	L_dist_hi_31811	S	Chr5L:153522106-153522306	0.414622	0.287486	Chr5L:153522205-153522405	0.665574	0.287486
Chr5L	155652699	155653200	L_dist_hi_31867	PS	Chr5L:155653031-155653231	1.00454	0.412476	Chr5L:155653039-155653239	2.036	0.474972
Chr5L	156681379	156681880	L_dist_hi_31873	PS	Chr5L:156681562-156681762	0.571934	0.224991	Chr5L:156681564-156681764	0.970113	0.224991
Chr5L	156798664	156799165	L_dist_hi_31875	S	Chr5L:156798903-156799103	0.493278	0.412476	Chr5L:156798723-156798923	0.991866	0.412476
Chr5L	157521674	157522175	L_dist_hi_31904	P	Chr5L:157521836-157522036	0.847228	0.412476	Chr5L:157521674-157521874	0.513304	0.287486
Chr5L	157522002	157522503	L_dist_hi_31905	P	Chr5L:157521933-157522133	0.729245	0.224991	Chr5L:157522249-157522449	0.40454	0.349981
Chr5L	157532243	157532744	L_dist_hi_31912	PS	Chr5L:157532528-157532728	1.04387	0.412476	Chr5L:157532386-157532586	2.25353	0.412476
Chr5L	158769558	158770059	L_dist_hi_31936	PS	Chr5L:158769682-158769882	0.532606	0.224991	Chr5L:158769858-158770058	0.665574	0.287486
Chr5L	161695192	161695693	L_dist_hi_31987	PS	Chr5L:161695304-161695504	1.24051	0.474972	Chr5L:161695283-161695483	1.03537	0.474972
Chr5L	162008931	162009432	L_dist_hi_31994	PS	Chr5L:162008983-162009183	0.925884	0.162495	Chr5L:162009083-162009283	2.25353	0.224991
Chr5L	162207328	162207829	L_dist_hi_32022	PS	Chr5L:162207406-162207606	0.768572	0.224991	Chr5L:162207475-162207675	1.86198	0.287486
Chr5L	162875739	162876240	L_dist_hi_32039	PS	Chr5L:162875855-162876055	0.611261	0.224991	Chr5L:162875909-162876109	0.665574	0.287486
Chr5L	163852748	163853249	L_dist_hi_32067	S	Chr5L:163852873-163853073	0.414622	0.287486	Chr5L:163852946-163853146	1.53569	0.224991
Chr5L	163857116	163857617	L_dist_hi_32070	S	Chr5L:163857017-163857217	0.493278	0.349981	Chr5L:163857309-163857509	1.07888	0.349981
Chr1L	174859351	174859852	L_dist_hi_3216	PS	Chr1L:174859715-174859915	1.27983	0.287486	Chr1L:174859420-174859620	2.62333	0.474972
Chr1L	174859821	174860322	L_dist_hi_3217	PS	Chr1L:174859857-174860057	1.27983	0.224991	Chr1L:174859792-174859992	1.79672	0.287486
Chr1L	174871403	174871904	L_dist_hi_3225	P	Chr1L:174871667-174871867	0.532606	0.224991	Chr1L:174871340-174871540	0.491551	0.349981
Chr1L	15960595	15961096	L_dist_hi_323	S	Chr1L:15960597-15960797	0.217983	0.412476	Chr1L:15960689-15960889	0.883102	0.287486
Chr1L	175594982	175595483	L_dist_hi_3265	PS	Chr1L:175595075-175595275	0.650589	0.287486	Chr1L:175595035-175595235	0.991866	0.224991
Chr1L	175988595	175989096	L_dist_hi_3282	S	Chr1L:175988835-175989035	0.296639	0.412476	Chr1L:175988595-175988795	0.774338	0.349981
Chr1L	176009959	176010460	L_dist_hi_3287	S	Chr1L:176010145-176010345	0.729245	0.412476	Chr1L:176010134-176010334	2.29704	0.412476
Chr1L	176162571	176163072	L_dist_hi_3299	PS	Chr1L:176162722-176162922	1.43714	0.349981	Chr1L:176162722-176162922	2.21003	0.349981
Chr1L	177701771	177702272	L_dist_hi_3359	PS	Chr1L:177701789-177701989	1.47647	0.224991	Chr1L:177701793-177701993	2.47106	0.224991
Chr1L	177704002	177704503	L_dist_hi_3360	PS	Chr1L:177704023-177704223	0.689917	0.224991	Chr1L:177704131-177704331	1.92724	0.287486
Chr1L	177718269	177718770	L_dist_hi_3364	S	Chr1L:177718598-177718798	0.296639	0.1	Chr1L:177718477-177718677	0.578562	0.1
Chr1L	178088421	178088922	L_dist_hi_3367	PS	Chr1L:178088530-178088730	0.768572	0.287486	Chr1L:178088610-178088810	1.36166	0.287486
Chr1L	178688443	178688944	L_dist_hi_3374	S	Chr1L:178688769-178688969	0.296639	0.1	Chr1L:178688716-178688916	0.55681	0.1
Chr1L	179024183	179024684	L_dist_hi_3385	S	Chr1L:179024084-179024284	0.375295	0.412476	Chr1L:179024352-179024552	1.07888	0.349981
Chr1L	179768653	179769154	L_dist_hi_3410	S	Chr1L:179768756-179768956	0.611261	0.412476	Chr1L:179768756-179768956	1.10063	0.412476
Chr1L	179814966	179815467	L_dist_hi_3414	PS	Chr1L:179814917-179815117	0.965211	0.224991	Chr1L:179815084-179815284	2.36229	0.287486
Chr1L	180463803	180464304	L_dist_hi_3426	PS	Chr1L:180463964-180464164	0.925884	0.287486	Chr1L:180463963-180464163	1.40517	0.287486
Chr1L	180861826	180862327	L_dist_hi_3446	PS	Chr1L:180862105-180862305	1.00454	0.224991	Chr1L:180862062-180862262	1.60095	0.349981
Chr1L	181013005	181013506	L_dist_hi_3449	S	Chr1L:181013183-181013383	0.965211	0.537467	Chr1L:181013283-181013483	1.6227	0.349981
Chr1L	18254107	18254608	L_dist_hi_345	PS	Chr1L:18254183-18254383	1.16185	0.224991	Chr1L:18254163-18254363	1.81847	0.224991
Chr1L	183268789	183269290	L_dist_hi_3487	S	Chr1L:183269135-183269335	0.45395	0.349981	Chr1L:183269005-183269205	1.01362	0.287486
Chr1L	183948934	183949435	L_dist_hi_3500	S	Chr1L:183948989-183949189	0.335967	0.224991	Chr1L:183949191-183949391	1.2529	0.412476
Chr6L	402927	403428	L_dist_hi_35024	S	Chr6L:403157-403357	0.45395	0.162495	Chr6L:403194-403394	0.600315	0.162495
Chr6L	2123223	2123724	L_dist_hi_35088	PS	Chr6L:2123365-2123565	1.7911	0.224991	Chr6L:2123369-2123569	1.44868	0.224991
Chr6L	2270211	2270712	L_dist_hi_35133	PS	Chr6L:2270289-2270489	0.965211	0.224991	Chr6L:2270404-2270604	2.71034	0.224991
Chr6L	2273770	2274271	L_dist_hi_35137	PS	Chr6L:2273929-2274129	1.12252	0.412476	Chr6L:2273943-2274143	1.42692	0.412476
Chr6L	2333265	2333766	L_dist_hi_35159	S	Chr6L:2333345-2333545	0.611261	0.349981	Chr6L:2333298-2333498	0.600315	0.287486
Chr6L	2338460	2338961	L_dist_hi_35162	PS	Chr6L:2338808-2339008	0.650589	0.1	Chr6L:2338797-2338997	0.622068	0.1
Chr6L	2338942	2339443	L_dist_hi_35163	S	Chr6L:2339141-2339341	0.532606	0.287486	Chr6L:2339339-2339539	1.31816	0.224991
Chr6L	2979544	2980045	L_dist_hi_35195	PS	Chr6L:2979454-2979654	1.75177	0.349981	Chr6L:2979544-2979744	1.53569	0.412476
Chr6L	3084205	3084706	L_dist_hi_35212	PS	Chr6L:3084544-3084744	0.532606	0.224991	Chr6L:3084409-3084609	0.948361	0.287486
Chr6L	3092394	3092895	L_dist_hi_35218	PS	Chr6L:3092430-3092630	1.63378	0.287486	Chr6L:3092447-3092647	1.6662	0.287486
Chr6L	3105694	3106195	L_dist_hi_35228	P	Chr6L:3105904-3106104	0.611261	0.224991	Chr6L:3105847-3106047	0.339281	0.287486
Chr6L	4063834	4064335	L_dist_hi_35282	PS	Chr6L:4063903-4064103	0.611261	0.162495	Chr6L:4063903-4064103	0.55681	0.162495
Chr6L	4077125	4077626	L_dist_hi_35285	S	Chr6L:4077054-4077254	0.375295	0.474972	Chr6L:4077313-4077513	1.23115	0.287486
Chr6L	4445840	4446341	L_dist_hi_35309	PS	Chr6L:4446085-4446285	0.532606	0.162495	Chr6L:4446085-4446285	0.839596	0.162495
Chr6L	4510224	4510725	L_dist_hi_35316	PS	Chr6L:4510391-4510591	0.571934	0.1	Chr6L:4510351-4510551	0.535057	0.1
Chr6L	4590118	4590619	L_dist_hi_35320	S	Chr6L:4590350-4590550	0.375295	0.224991	Chr6L:4590252-4590452	0.535057	0.224991
Chr6L	4692285	4692786	L_dist_hi_35324	PS	Chr6L:4692420-4692620	3.32488	0.349981	Chr6L:4692400-4692600	1.29641	0.349981
Chr6L	4696496	4696997	L_dist_hi_35326	PS	Chr6L:4696691-4696891	1.43714	0.474972	Chr6L:4696623-4696823	0.839596	0.349981
Chr6L	4706675	4707176	L_dist_hi_35328	P	Chr6L:4706837-4707037	1.00454	0.349981	Chr6L:4706816-4707016	0.491551	0.412476
Chr6L	5119795	5120296	L_dist_hi_35351	S	Chr6L:5119937-5120137	0.45395	0.349981	Chr6L:5119902-5120102	0.839596	0.412476
Chr6L	6837041	6837542	L_dist_hi_35467	PS	Chr6L:6837148-6837348	0.847228	0.287486	Chr6L:6837042-6837242	1.60095	0.287486
Chr6L	8222257	8222758	L_dist_hi_35484	S	Chr6L:8222187-8222387	0.493278	0.662457	Chr6L:8222488-8222688	1.05712	0.474972
Chr6L	8440465	8440966	L_dist_hi_35491	P	Chr6L:8440594-8440794	0.611261	0.224991	Chr6L:8440474-8440674	0.317528	0.162495
Chr6L	10911909	10912410	L_dist_hi_35532	PS	Chr6L:10912046-10912246	0.532606	0.224991	Chr6L:10912103-10912303	1.14414	0.224991
Chr6L	11664412	11664913	L_dist_hi_35557	PS	Chr6L:11664595-11664795	0.611261	0.287486	Chr6L:11664463-11664663	0.948361	0.224991
Chr6L	15179502	15180003	L_dist_hi_35621	S	Chr6L:15179738-15179938	0.414622	0.224991	Chr6L:15179773-15179973	0.600315	0.162495
Chr1L	187276324	187276825	L_dist_hi_3564	P	Chr1L:187276538-187276738	0.650589	0.287486	Chr1L:187276524-187276724	0.382787	0.287486
Chr6L	17192397	17192898	L_dist_hi_35666	PS	Chr6L:17192453-17192653	0.611261	0.224991	Chr6L:17192460-17192660	1.77497	0.224991
Chr6L	20287592	20288093	L_dist_hi_35718	S	Chr6L:20287780-20287980	0.689917	0.412476	Chr6L:20287792-20287992	1.6227	0.412476
Chr6L	20293695	20294196	L_dist_hi_35722	PS	Chr6L:20293947-20294147	0.768572	0.162495	Chr6L:20293930-20294130	2.12301	0.162495
Chr6L	24094214	24094715	L_dist_hi_35801	PS	Chr6L:24094311-24094511	1.47647	0.537467	Chr6L:24094360-24094560	1.40517	0.599962
Chr6L	25820859	25821360	L_dist_hi_35846	S	Chr6L:25820859-25821059	0.375295	0.162495	Chr6L:25820984-25821184	0.839596	0.162495
Chr6L	26081111	26081612	L_dist_hi_35854	S	Chr6L:26081264-26081464	0.493278	0.287486	Chr6L:26081183-26081383	0.578562	0.224991
Chr6L	26219972	26220473	L_dist_hi_35864	S	Chr6L:26220045-26220245	0.45395	0.224991	Chr6L:26220158-26220358	1.40517	0.224991
Chr6L	26222319	26222820	L_dist_hi_35866	S	Chr6L:26222482-26222682	0.493278	0.287486	Chr6L:26222482-26222682	0.796091	0.287486
Chr6L	26253415	26253916	L_dist_hi_35887	S	Chr6L:26253570-26253770	0.45395	0.349981	Chr6L:26253557-26253757	1.01362	0.349981
Chr6L	26598032	26598533	L_dist_hi_35897	S	Chr6L:26598281-26598481	0.729245	0.474972	Chr6L:26598139-26598339	1.10063	0.474972
Chr6L	26648675	26649176	L_dist_hi_35905	PS	Chr6L:26648868-26649068	0.925884	0.1	Chr6L:26648811-26649011	1.2529	0.1
Chr6L	26649009	26649510	L_dist_hi_35906	PS	Chr6L:26649200-26649400	0.729245	0.287486	Chr6L:26648910-26649110	1.07888	0.162495
Chr6L	26649623	26650124	L_dist_hi_35907	PS	Chr6L:26649812-26650012	1.43714	0.349981	Chr6L:26649927-26650127	2.38405	0.287486
Chr6L	26650759	26651260	L_dist_hi_35908	PS	Chr6L:26650852-26651052	1.20118	0.474972	Chr6L:26650871-26651071	2.14477	0.474972
Chr6L	26688006	26688507	L_dist_hi_35914	S	Chr6L:26688145-26688345	0.45395	0.349981	Chr6L:26688396-26688596	0.926608	0.224991
Chr6L	26693682	26694183	L_dist_hi_35920	PS	Chr6L:26693850-26694050	0.729245	0.287486	Chr6L:26693901-26694101	1.16589	0.224991
Chr6L	26838592	26839093	L_dist_hi_35926	PS	Chr6L:26838652-26838852	0.532606	0.162495	Chr6L:26838689-26838889	1.49218	0.162495
Chr6L	29411737	29412238	L_dist_hi_35959	PS	Chr6L:29412016-29412216	0.847228	0.162495	Chr6L:29411924-29412124	1.20939	0.162495
Chr6L	30449775	30450276	L_dist_hi_35969	P	Chr6L:30449931-30450131	0.532606	0.224991	Chr6L:30449837-30450037	0.361034	0.162495
Chr6L	31577603	31578104	L_dist_hi_35988	PS	Chr6L:31577809-31578009	0.611261	0.224991	Chr6L:31577759-31577959	1.05712	0.162495
Chr6L	33864121	33864622	L_dist_hi_36024	PS	Chr6L:33864169-33864369	0.611261	0.287486	Chr6L:33864396-33864596	1.68796	0.162495
Chr6L	33874594	33875095	L_dist_hi_36029	PS	Chr6L:33874693-33874893	0.611261	0.224991	Chr6L:33874835-33875035	0.687327	0.287486
Chr6L	33882150	33882651	L_dist_hi_36034	PS	Chr6L:33882339-33882539	0.532606	0.224991	Chr6L:33882339-33882539	2.25353	0.224991
Chr6L	33884783	33885284	L_dist_hi_36036	S	Chr6L:33884704-33884904	0.217983	0.224991	Chr6L:33884888-33885088	0.709079	0.349981
Chr6L	34439221	34439722	L_dist_hi_36054	PS	Chr6L:34439168-34439368	0.965211	0.412476	Chr6L:34439387-34439587	1.44868	0.537467
Chr1L	188541520	188542021	L_dist_hi_3607	PS	Chr1L:188541480-188541680	0.571934	0.224991	Chr1L:188541647-188541847	0.991866	0.349981
Chr6L	38386729	38387230	L_dist_hi_36092	S	Chr6L:38386743-38386943	0.493278	0.349981	Chr6L:38386778-38386978	1.18764	0.349981
Chr6L	38722043	38722544	L_dist_hi_36094	S	Chr6L:38722188-38722388	0.611261	0.474972	Chr6L:38722152-38722352	2.01425	0.537467
Chr6L	38745458	38745959	L_dist_hi_36097	S	Chr6L:38745781-38745981	0.571934	0.349981	Chr6L:38745623-38745823	1.49218	0.224991
Chr6L	39647246	39647747	L_dist_hi_36118	S	Chr6L:39647198-39647398	0.611261	0.537467	Chr6L:39647423-39647623	1.07888	0.537467
Chr6L	40028624	40029125	L_dist_hi_36129	S	Chr6L:40028724-40028924	0.571934	0.349981	Chr6L:40028641-40028841	0.948361	0.349981
Chr6L	41123761	41124262	L_dist_hi_36161	S	Chr6L:41123795-41123995	0.335967	0.287486	Chr6L:41123883-41124083	0.730832	0.224991
Chr6L	41127611	41128112	L_dist_hi_36162	S	Chr6L:41127771-41127971	0.493278	0.412476	Chr6L:41127685-41127885	0.970113	0.287486
Chr6L	41219769	41220270	L_dist_hi_36170	S	Chr6L:41220068-41220268	0.45395	0.1	Chr6L:41219986-41220186	1.51393	0.1
Chr6L	41223214	41223715	L_dist_hi_36172	S	Chr6L:41223305-41223505	0.45395	0.349981	Chr6L:41223330-41223530	0.883102	0.412476
Chr6L	42625062	42625563	L_dist_hi_36187	S	Chr6L:42624963-42625163	0.532606	0.412476	Chr6L:42625392-42625592	0.709079	0.1
Chr6L	42663925	42664426	L_dist_hi_36190	S	Chr6L:42664126-42664326	0.493278	0.412476	Chr6L:42664309-42664509	0.948361	0.287486
Chr6L	42725758	42726259	L_dist_hi_36192	S	Chr6L:42725867-42726067	0.493278	0.287486	Chr6L:42725917-42726117	0.665574	0.224991
Chr6L	42796272	42796773	L_dist_hi_36194	S	Chr6L:42796563-42796763	0.45395	0.287486	Chr6L:42796453-42796653	0.55681	0.162495
Chr6L	42810019	42810520	L_dist_hi_36199	PS	Chr6L:42809998-42810198	1.35849	0.224991	Chr6L:42810140-42810340	2.8191	0.349981
Chr6L	42814729	42815230	L_dist_hi_36200	PS	Chr6L:42814945-42815145	1.31916	0.162495	Chr6L:42814933-42815133	1.51393	0.162495
Chr6L	42816637	42817138	L_dist_hi_36201	PS	Chr6L:42817003-42817203	0.729245	0.287486	Chr6L:42816885-42817085	1.2529	0.287486
Chr6L	43547609	43548110	L_dist_hi_36234	PS	Chr6L:43547728-43547928	0.886556	0.224991	Chr6L:43547776-43547976	1.18764	0.224991
Chr6L	44866210	44866711	L_dist_hi_36246	S	Chr6L:44866518-44866718	0.689917	0.349981	Chr6L:44866384-44866584	1.12238	0.349981
Chr6L	48663639	48664140	L_dist_hi_36285	PS	Chr6L:48663694-48663894	0.532606	0.1	Chr6L:48663861-48664061	1.07888	0.162495
Chr6L	49449535	49450036	L_dist_hi_36291	PS	Chr6L:49449572-49449772	0.571934	0.162495	Chr6L:49449707-49449907	0.970113	0.287486
Chr6L	50118542	50119043	L_dist_hi_36305	PS	Chr6L:50118648-50118848	0.729245	0.162495	Chr6L:50118679-50118879	1.86198	0.224991
Chr6L	56041647	56042148	L_dist_hi_36396	S	Chr6L:56041618-56041818	0.375295	0.162495	Chr6L:56041754-56041954	0.904855	0.1
Chr6L	56618108	56618609	L_dist_hi_36399	S	Chr6L:56618153-56618353	1.08319	0.599962	Chr6L:56618169-56618369	2.25353	0.662457
Chr6L	56620140	56620641	L_dist_hi_36400	PS	Chr6L:56620299-56620499	0.689917	0.162495	Chr6L:56620294-56620494	1.6227	0.162495
Chr6L	56622913	56623414	L_dist_hi_36402	S	Chr6L:56622814-56623014	0.414622	0.287486	Chr6L:56622988-56623188	0.709079	0.224991
Chr6L	58273808	58274309	L_dist_hi_36433	PS	Chr6L:58273808-58274008	0.611261	0.162495	Chr6L:58273965-58274165	0.665574	0.162495
Chr6L	65632572	65633073	L_dist_hi_36488	S	Chr6L:65632804-65633004	0.689917	0.474972	Chr6L:65632705-65632905	0.991866	0.474972
Chr6L	71451914	71452415	L_dist_hi_36535	PS	Chr6L:71452119-71452319	0.650589	0.224991	Chr6L:71452019-71452219	1.18764	0.349981
Chr6L	71983485	71983986	L_dist_hi_36541	PS	Chr6L:71983568-71983768	1.43714	0.662457	Chr6L:71983691-71983891	3.90675	0.537467
Chr1L	192177245	192177746	L_dist_hi_3655	P	Chr1L:192177436-192177636	0.571934	0.224991	Chr1L:192177225-192177425	0.40454	0.224991
Chr6L	74754402	74754903	L_dist_hi_36556	PS	Chr6L:74754501-74754701	1.67311	0.224991	Chr6L:74754455-74754655	1.68796	0.224991
Chr1L	192197085	192197586	L_dist_hi_3657	S	Chr1L:192197335-192197535	0.8079	0.537467	Chr1L:192197371-192197571	2.66683	0.537467
Chr6L	79699861	79700362	L_dist_hi_36584	S	Chr6L:79700085-79700285	0.414622	0.349981	Chr6L:79700109-79700309	0.861349	0.287486
Chr6L	79765979	79766480	L_dist_hi_36587	PS	Chr6L:79766196-79766396	0.571934	0.1	Chr6L:79766189-79766389	1.40517	0.1
Chr6L	81812031	81812532	L_dist_hi_36601	S	Chr6L:81812122-81812322	0.689917	0.412476	Chr6L:81812263-81812463	1.14414	0.474972
Chr6L	82056740	82057241	L_dist_hi_36605	S	Chr6L:82056806-82057006	0.650589	0.349981	Chr6L:82056663-82056863	0.796091	0.287486
Chr6L	89933872	89934373	L_dist_hi_36630	S	Chr6L:89933773-89933973	0.493278	0.162495	Chr6L:89933894-89934094	0.861349	0.224991
Chr6L	90008219	90008720	L_dist_hi_36635	PS	Chr6L:90008617-90008817	0.847228	0.224991	Chr6L:90008563-90008763	1.14414	0.287486
Chr6L	90138448	90138949	L_dist_hi_36637	P	Chr6L:90138358-90138558	0.611261	0.162495	Chr6L:90138448-90138648	0.339281	0.287486
Chr6L	95512719	95513220	L_dist_hi_36708	PS	Chr6L:95512734-95512934	0.768572	0.287486	Chr6L:95512737-95512937	1.07888	0.287486
Chr6L	95513988	95514489	L_dist_hi_36709	S	Chr6L:95514133-95514333	0.45395	0.224991	Chr6L:95514145-95514345	0.600315	0.224991
Chr6L	97639735	97640236	L_dist_hi_36752	P	Chr6L:97639636-97639836	0.729245	0.162495	Chr6L:97640119-97640319	0.665574	0.349981
Chr6L	97642966	97643467	L_dist_hi_36757	S	Chr6L:97643340-97643540	0.45395	0.537467	Chr6L:97643182-97643382	0.970113	0.287486
Chr6L	97925889	97926390	L_dist_hi_36762	S	Chr6L:97925896-97926096	0.375295	0.287486	Chr6L:97926042-97926242	0.622068	0.287486
Chr6L	98497004	98497505	L_dist_hi_36773	S	Chr6L:98497035-98497235	0.375295	0.224991	Chr6L:98497098-98497298	1.81847	0.224991
Chr6L	99123256	99123757	L_dist_hi_36787	S	Chr6L:99123320-99123520	0.375295	0.162495	Chr6L:99123501-99123701	1.81847	0.287486
Chr1L	18966964	18967465	L_dist_hi_368	PS	Chr1L:18967109-18967309	1.12252	0.224991	Chr1L:18967148-18967348	1.07888	0.224991
Chr6L	103247478	103247979	L_dist_hi_36837	S	Chr6L:103247478-103247678	0.296639	0.224991	Chr6L:103247484-103247684	0.55681	0.224991
Chr6L	103525237	103525738	L_dist_hi_36845	S	Chr6L:103525561-103525761	0.611261	0.349981	Chr6L:103525458-103525658	1.16589	0.287486
Chr6L	104978864	104979365	L_dist_hi_36861	PS	Chr6L:104978987-104979187	0.532606	0.224991	Chr6L:104978936-104979136	1.14414	0.1
Chr6L	105557137	105557638	L_dist_hi_36866	PS	Chr6L:105557302-105557502	0.689917	0.162495	Chr6L:105557281-105557481	1.29641	0.162495
Chr1L	193676135	193676636	L_dist_hi_3688	S	Chr1L:193676220-193676420	0.45395	0.224991	Chr1L:193676245-193676445	0.926608	0.224991
Chr6L	110428752	110429253	L_dist_hi_36934	P	Chr6L:110428802-110429002	0.925884	0.349981	Chr6L:110428801-110429001	0.665574	0.349981
Chr6L	110575873	110576374	L_dist_hi_36936	S	Chr6L:110576035-110576235	0.45395	0.349981	Chr6L:110576051-110576251	1.42692	0.349981
Chr6L	111158980	111159481	L_dist_hi_36953	S	Chr6L:111158882-111159082	0.375295	0.162495	Chr6L:111159082-111159282	1.10063	0.162495
Chr6L	112368430	112368931	L_dist_hi_36970	S	Chr6L:112368528-112368728	0.414622	0.287486	Chr6L:112368730-112368930	0.970113	0.224991
Chr6L	113094198	113094699	L_dist_hi_36976	S	Chr6L:113094453-113094653	0.414622	0.1	Chr6L:113094275-113094475	0.774338	0.162495
Chr6L	115437880	115438381	L_dist_hi_37028	S	Chr6L:115437880-115438080	0.532606	0.474972	Chr6L:115438065-115438265	0.730832	0.224991
Chr6L	116259423	116259924	L_dist_hi_37052	S	Chr6L:116259563-116259763	0.532606	0.349981	Chr6L:116259568-116259768	1.44868	0.349981
Chr6L	118672216	118672717	L_dist_hi_37076	PS	Chr6L:118672382-118672582	1.00454	0.287486	Chr6L:118672425-118672625	1.42692	0.287486
Chr6L	118673535	118674036	L_dist_hi_37078	P	Chr6L:118673896-118674096	0.8079	0.224991	Chr6L:118673692-118673892	0.426293	0.162495
Chr6L	118673927	118674428	L_dist_hi_37079	PS	Chr6L:118674065-118674265	1.86975	0.224991	Chr6L:118674037-118674237	0.948361	0.224991
Chr6L	122895757	122896258	L_dist_hi_37147	PS	Chr6L:122895981-122896181	0.532606	0.162495	Chr6L:122896005-122896205	1.03537	0.162495
Chr6L	122908832	122909333	L_dist_hi_37151	S	Chr6L:122908934-122909134	0.571934	0.412476	Chr6L:122909079-122909279	1.33991	0.412476
Chr6L	123239346	123239847	L_dist_hi_37159	S	Chr6L:123239602-123239802	0.493278	0.287486	Chr6L:123239412-123239612	0.796091	0.287486
Chr6L	124869839	124870340	L_dist_hi_37190	PS	Chr6L:124869851-124870051	1.7911	0.349981	Chr6L:124869953-124870153	3.44994	0.287486
Chr6L	124927943	124928444	L_dist_hi_37193	PS	Chr6L:124928217-124928417	1.63378	0.412476	Chr6L:124928171-124928371	1.70971	0.474972
Chr1L	195212333	195212834	L_dist_hi_3720	S	Chr1L:195212470-195212670	0.925884	0.537467	Chr1L:195212437-195212637	1.47043	0.537467
Chr6L	125081913	125082414	L_dist_hi_37207	PS	Chr6L:125081814-125082014	1.12252	0.412476	Chr6L:125081824-125082024	1.42692	0.412476
Chr6L	125106882	125107383	L_dist_hi_37215	PS	Chr6L:125106942-125107142	1.27983	0.287486	Chr6L:125107030-125107230	1.20939	0.287486
Chr6L	126202837	126203338	L_dist_hi_37226	PS	Chr6L:126203006-126203206	0.925884	0.224991	Chr6L:126202988-126203188	2.84086	0.224991
Chr6L	128553854	128554355	L_dist_hi_37270	S	Chr6L:128553878-128554078	0.611261	0.537467	Chr6L:128553926-128554126	2.036	0.787448
Chr6L	128634664	128635165	L_dist_hi_37280	PS	Chr6L:128634768-128634968	0.532606	0.162495	Chr6L:128634797-128634997	1.27465	0.162495
Chr6L	129927787	129928288	L_dist_hi_37302	PS	Chr6L:129927787-129927987	0.729245	0.224991	Chr6L:129927709-129927909	1.14414	0.224991
Chr6L	133316279	133316780	L_dist_hi_37348	S	Chr6L:133316393-133316593	0.414622	0.287486	Chr6L:133316456-133316656	0.709079	0.349981
Chr6L	133324413	133324914	L_dist_hi_37351	P	Chr6L:133324498-133324698	0.689917	0.1	Chr6L:133324438-133324638	0.426293	0.162495
Chr6L	133366779	133367280	L_dist_hi_37361	S	Chr6L:133366733-133366933	0.375295	0.224991	Chr6L:133366897-133367097	0.730832	0.1
Chr6L	134624469	134624970	L_dist_hi_37385	PS	Chr6L:134624625-134624825	0.8079	0.349981	Chr6L:134624472-134624672	1.47043	0.349981
Chr6L	135896183	135896684	L_dist_hi_37413	P	Chr6L:135896345-135896545	0.532606	0.162495	Chr6L:135896422-135896622	0.491551	0.162495
Chr6L	135896855	135897356	L_dist_hi_37414	PS	Chr6L:135897033-135897233	0.768572	0.349981	Chr6L:135896855-135897055	0.535057	0.224991
Chr1L	196895416	196895917	L_dist_hi_3746	PS	Chr1L:196895658-196895858	0.729245	0.287486	Chr1L:196895564-196895764	0.904855	0.349981
Chr6L	137991248	137991749	L_dist_hi_37463	S	Chr6L:137991465-137991665	0.532606	0.287486	Chr6L:137991418-137991618	1.31816	0.224991
Chr1L	196906830	196907331	L_dist_hi_3748	S	Chr1L:196906918-196907118	0.335967	0.474972	Chr1L:196907027-196907227	0.883102	0.349981
Chr6L	139127346	139127847	L_dist_hi_37495	S	Chr6L:139127357-139127557	0.768572	0.412476	Chr6L:139127470-139127670	2.07951	0.412476
Chr6L	141152099	141152600	L_dist_hi_37549	S	Chr6L:141152252-141152452	0.571934	0.287486	Chr6L:141152189-141152389	0.730832	0.287486
Chr1L	197339479	197339980	L_dist_hi_3755	S	Chr1L:197339568-197339768	0.650589	0.349981	Chr1L:197339685-197339885	1.40517	0.287486
Chr6L	141155435	141155936	L_dist_hi_37551	PS	Chr6L:141155438-141155638	1.35849	0.287486	Chr6L:141155473-141155673	1.70971	0.349981
Chr6L	141963597	141964098	L_dist_hi_37571	S	Chr6L:141963737-141963937	0.414622	0.224991	Chr6L:141963749-141963949	0.687327	0.224991
Chr6L	147603892	147604393	L_dist_hi_37653	S	Chr6L:147603957-147604157	0.493278	0.474972	Chr6L:147603921-147604121	1.6662	0.474972
Chr6L	147684323	147684824	L_dist_hi_37657	S	Chr6L:147684696-147684896	0.532606	0.349981	Chr6L:147684720-147684920	1.01362	0.349981
Chr6L	148157244	148157745	L_dist_hi_37668	S	Chr6L:148157246-148157446	0.257311	0.162495	Chr6L:148157318-148157518	0.839596	0.162495
Chr6L	148192046	148192547	L_dist_hi_37671	PS	Chr6L:148192015-148192215	0.847228	0.224991	Chr6L:148192076-148192276	0.883102	0.224991
Chr6L	150507096	150507597	L_dist_hi_37708	PS	Chr6L:150507482-150507682	1.27983	0.474972	Chr6L:150507402-150507602	1.94899	0.537467
Chr6L	151259629	151260130	L_dist_hi_37731	PS	Chr6L:151259945-151260145	0.571934	0.1	Chr6L:151259845-151260045	1.14414	0.1
Chr6L	162173501	162174002	L_dist_hi_37920	S	Chr6L:162173736-162173936	0.335967	0.412476	Chr6L:162173595-162173795	0.970113	0.474972
Chr6L	163023221	163023722	L_dist_hi_38012	PS	Chr6L:163023461-163023661	0.8079	0.287486	Chr6L:163023527-163023727	0.622068	0.224991
Chr6L	163104651	163105152	L_dist_hi_38027	S	Chr6L:163104808-163105008	0.375295	0.162495	Chr6L:163104911-163105111	0.513304	0.162495
Chr6L	163106268	163106769	L_dist_hi_38029	S	Chr6L:163106516-163106716	0.45395	0.224991	Chr6L:163106446-163106646	0.665574	0.224991
Chr6L	163335398	163335899	L_dist_hi_38061	PS	Chr6L:163335511-163335711	1.08319	0.349981	Chr6L:163335497-163335697	0.904855	0.349981
Chr6L	163339686	163340187	L_dist_hi_38065	PS	Chr6L:163339764-163339964	0.965211	0.287486	Chr6L:163339587-163339787	0.926608	0.287486
Chr6L	163341134	163341635	L_dist_hi_38067	S	Chr6L:163341353-163341553	0.532606	0.474972	Chr6L:163341476-163341676	1.05712	0.349981
Chr6L	163342166	163342667	L_dist_hi_38069	S	Chr6L:163342248-163342448	0.45395	0.224991	Chr6L:163342368-163342568	0.513304	0.162495
Chr1L	200567561	200568062	L_dist_hi_3840	PS	Chr1L:200567805-200568005	0.925884	0.162495	Chr1L:200567775-200567975	1.31816	0.224991
Chr1L	201825899	201826400	L_dist_hi_3885	PS	Chr1L:201825907-201826107	0.650589	0.224991	Chr1L:201825924-201826124	0.839596	0.224991
Chr1L	202050923	202051424	L_dist_hi_3887	PS	Chr1L:202051306-202051506	0.8079	0.287486	Chr1L:202051166-202051366	0.817844	0.287486
Chr1L	202075501	202076002	L_dist_hi_3889	PS	Chr1L:202075601-202075801	0.847228	0.224991	Chr1L:202075722-202075922	0.665574	0.224991
Chr1L	203187781	203188282	L_dist_hi_3927	P	Chr1L:203187802-203188002	0.768572	0.349981	Chr1L:203187895-203188095	0.643821	0.412476
Chr1L	204383403	204383904	L_dist_hi_3950	S	Chr1L:204383572-204383772	0.650589	0.474972	Chr1L:204383541-204383741	1.53569	0.474972
Chr1L	205460960	205461461	L_dist_hi_3969	S	Chr1L:205461026-205461226	0.493278	0.162495	Chr1L:205461092-205461292	1.05712	0.162495
Chr1L	206195651	206196152	L_dist_hi_3982	PS	Chr1L:206195803-206196003	0.689917	0.1	Chr1L:206196003-206196203	0.687327	0.1
Chr1L	206199059	206199560	L_dist_hi_3984	PS	Chr1L:206199171-206199371	1.63378	0.412476	Chr1L:206199223-206199423	2.36229	0.349981
Chr1L	206202056	206202557	L_dist_hi_3985	PS	Chr1L:206202176-206202376	1.27983	0.162495	Chr1L:206202187-206202387	1.53569	0.162495
Chr1L	206203374	206203875	L_dist_hi_3986	P	Chr1L:206203515-206203715	0.650589	0.287486	Chr1L:206203553-206203753	0.426293	0.224991
Chr1L	19946689	19947190	L_dist_hi_400	PS	Chr1L:19946590-19946790	0.532606	0.224991	Chr1L:19946724-19946924	0.948361	0.162495
Chr7L	730397	730898	L_dist_hi_40647	P	Chr7L:730342-730542	1.12252	0.287486	Chr7L:730546-730746	0.361034	0.287486
Chr7L	742714	743215	L_dist_hi_40655	PS	Chr7L:742991-743191	1.04387	0.287486	Chr7L:743008-743208	1.81847	0.287486
Chr7L	1178830	1179331	L_dist_hi_40689	S	Chr7L:1178949-1179149	0.375295	0.162495	Chr7L:1179022-1179222	0.839596	0.162495
Chr7L	1183156	1183657	L_dist_hi_40694	S	Chr7L:1183519-1183719	0.335967	0.224991	Chr7L:1183308-1183508	0.730832	0.349981
Chr7L	1761597	1762098	L_dist_hi_40723	S	Chr7L:1761838-1762038	0.45395	0.412476	Chr7L:1761973-1762173	1.05712	0.474972
Chr7L	1761906	1762407	L_dist_hi_40724	S	Chr7L:1762079-1762279	0.768572	0.537467	Chr7L:1762080-1762280	1.51393	0.474972
Chr7L	1762364	1762865	L_dist_hi_40725	PS	Chr7L:1762279-1762479	0.847228	0.287486	Chr7L:1762290-1762490	0.948361	0.287486
Chr7L	1845768	1846269	L_dist_hi_40745	S	Chr7L:1845975-1846175	0.257311	0.162495	Chr7L:1845858-1846058	0.513304	0.224991
Chr7L	2645056	2645557	L_dist_hi_40768	S	Chr7L:2645200-2645400	0.650589	0.412476	Chr7L:2645425-2645625	0.600315	0.287486
Chr7L	2834221	2834722	L_dist_hi_40779	PS	Chr7L:2834122-2834322	0.532606	0.224991	Chr7L:2834133-2834333	0.839596	0.224991
Chr7L	2969519	2970020	L_dist_hi_40785	S	Chr7L:2969714-2969914	0.375295	0.1	Chr7L:2969646-2969846	0.55681	0.162495
Chr7L	3926855	3927356	L_dist_hi_40817	S	Chr7L:3926756-3926956	0.296639	0.162495	Chr7L:3926973-3927173	1.73146	0.287486
Chr7L	4563838	4564339	L_dist_hi_40833	S	Chr7L:4564085-4564285	0.611261	0.474972	Chr7L:4564194-4564394	1.07888	0.474972
Chr7L	7424096	7424597	L_dist_hi_40916	PS	Chr7L:7424390-7424590	0.650589	0.287486	Chr7L:7424211-7424411	1.97074	0.224991
Chr7L	7424586	7425087	L_dist_hi_40917	S	Chr7L:7424677-7424877	0.689917	0.412476	Chr7L:7424819-7425019	3.12364	0.474972
Chr7L	8789000	8789501	L_dist_hi_40965	PS	Chr7L:8789154-8789354	1.24051	0.162495	Chr7L:8789067-8789267	2.036	0.162495
Chr7L	11097423	11097924	L_dist_hi_40991	S	Chr7L:11097817-11098017	0.414622	0.287486	Chr7L:11097436-11097636	0.600315	0.287486
Chr7L	12515212	12515713	L_dist_hi_41020	S	Chr7L:12515417-12515617	0.532606	0.287486	Chr7L:12515495-12515695	0.622068	0.224991
Chr1L	208934578	208935079	L_dist_hi_4106	P	Chr1L:208934887-208935087	0.571934	0.162495	Chr1L:208934867-208935067	0.40454	0.162495
Chr7L	13544584	13545085	L_dist_hi_41060	S	Chr7L:13544521-13544721	0.532606	0.412476	Chr7L:13544663-13544863	2.53632	0.412476
Chr7L	13830631	13831132	L_dist_hi_41076	PS	Chr7L:13830853-13831053	0.689917	0.224991	Chr7L:13830819-13831019	1.47043	0.224991
Chr7L	15184164	15184665	L_dist_hi_41115	S	Chr7L:15184210-15184410	0.571934	0.412476	Chr7L:15184371-15184571	0.904855	0.349981
Chr7L	15271194	15271695	L_dist_hi_41116	S	Chr7L:15271334-15271534	0.296639	0.287486	Chr7L:15271341-15271541	0.970113	0.287486
Chr7L	15281179	15281680	L_dist_hi_41121	PS	Chr7L:15281499-15281699	0.571934	0.224991	Chr7L:15281496-15281696	1.31816	0.224991
Chr7L	15793576	15794077	L_dist_hi_41128	P	Chr7L:15793596-15793796	1.08319	0.474972	Chr7L:15793707-15793907	0.643821	0.537467
Chr7L	17003743	17004244	L_dist_hi_41151	PS	Chr7L:17003748-17003948	0.571934	0.224991	Chr7L:17003952-17004152	0.926608	0.349981
Chr7L	20038674	20039175	L_dist_hi_41192	S	Chr7L:20038825-20039025	0.571934	0.349981	Chr7L:20038946-20039146	0.687327	0.287486
Chr7L	20039160	20039661	L_dist_hi_41193	S	Chr7L:20039313-20039513	0.493278	0.287486	Chr7L:20039280-20039480	0.600315	0.224991
Chr7L	20058639	20059140	L_dist_hi_41195	PS	Chr7L:20058723-20058923	1.00454	0.162495	Chr7L:20058739-20058939	1.10063	0.162495
Chr7L	20361157	20361658	L_dist_hi_41206	S	Chr7L:20361058-20361258	0.375295	0.162495	Chr7L:20361157-20361357	0.55681	0.224991
Chr7L	20431263	20431764	L_dist_hi_41212	S	Chr7L:20431420-20431620	0.45395	0.224991	Chr7L:20431424-20431624	1.01362	0.224991
Chr1L	209644503	209645004	L_dist_hi_4123	S	Chr1L:209644585-209644785	0.296639	0.1	Chr1L:209644680-209644880	0.622068	0.1
Chr7L	26883131	26883632	L_dist_hi_41303	S	Chr7L:26883436-26883636	0.532606	0.349981	Chr7L:26883229-26883429	0.578562	0.224991
Chr7L	26883863	26884364	L_dist_hi_41305	PS	Chr7L:26884262-26884462	0.847228	0.412476	Chr7L:26884080-26884280	1.36166	0.224991
Chr7L	26885788	26886289	L_dist_hi_41306	S	Chr7L:26886093-26886293	0.296639	0.224991	Chr7L:26885974-26886174	0.687327	0.224991
Chr7L	26998226	26998727	L_dist_hi_41308	S	Chr7L:26998136-26998336	0.689917	0.474972	Chr7L:26998296-26998496	1.64445	0.412476
Chr1L	21067803	21068304	L_dist_hi_414	PS	Chr1L:21068172-21068372	1.04387	0.349981	Chr1L:21067934-21068134	1.12238	0.287486
Chr7L	35343495	35343996	L_dist_hi_41427	S	Chr7L:35343708-35343908	0.689917	0.412476	Chr7L:35343556-35343756	1.47043	0.287486
Chr7L	39057187	39057688	L_dist_hi_41499	S	Chr7L:39057461-39057661	0.335967	0.224991	Chr7L:39057391-39057591	1.05712	0.224991
Chr1L	21068158	21068659	L_dist_hi_415	PS	Chr1L:21068243-21068443	1.08319	0.349981	Chr1L:21068347-21068547	1.40517	0.349981
Chr7L	40851003	40851504	L_dist_hi_41513	S	Chr7L:40851287-40851487	0.375295	0.287486	Chr7L:40851189-40851389	0.817844	0.287486
Chr7L	41580759	41581260	L_dist_hi_41522	P	Chr7L:41580761-41580961	3.01026	0.224991	Chr7L:41580865-41581065	0.535057	0.287486
Chr7L	42118329	42118830	L_dist_hi_41533	PS	Chr7L:42118510-42118710	0.689917	0.1	Chr7L:42118640-42118840	1.57919	0.162495
Chr7L	43044632	43045133	L_dist_hi_41548	S	Chr7L:43044663-43044863	0.217983	0.162495	Chr7L:43044898-43045098	0.970113	0.1
Chr1L	210873897	210874398	L_dist_hi_4155	S	Chr1L:210873897-210874097	0.178656	0.224991	Chr1L:210874266-210874466	0.578562	0.162495
Chr1L	210888045	210888546	L_dist_hi_4156	P	Chr1L:210888145-210888345	0.965211	0.224991	Chr1L:210888145-210888345	0.274023	0.224991
Chr7L	45947666	45948167	L_dist_hi_41578	S	Chr7L:45947567-45947767	0.768572	0.412476	Chr7L:45947604-45947804	1.6227	0.412476
Chr7L	54084445	54084946	L_dist_hi_41631	S	Chr7L:54084545-54084745	0.650589	0.349981	Chr7L:54084624-54084824	1.14414	0.287486
Chr7L	59836810	59837311	L_dist_hi_41665	S	Chr7L:59836937-59837137	0.532606	0.412476	Chr7L:59836898-59837098	1.2529	0.349981
Chr7L	61186307	61186808	L_dist_hi_41677	P	Chr7L:61186503-61186703	0.532606	0.162495	Chr7L:61186448-61186648	0.40454	0.224991
Chr7L	62951646	62952147	L_dist_hi_41692	S	Chr7L:62951649-62951849	0.257311	0.224991	Chr7L:62951854-62952054	0.600315	0.1
Chr7L	65802178	65802679	L_dist_hi_41719	PS	Chr7L:65802421-65802621	1.00454	0.474972	Chr7L:65802342-65802542	2.25353	0.349981
Chr7L	65803055	65803556	L_dist_hi_41720	S	Chr7L:65803095-65803295	0.571934	0.287486	Chr7L:65802993-65803193	0.774338	0.287486
Chr7L	76013116	76013617	L_dist_hi_41813	S	Chr7L:76013275-76013475	0.257311	0.412476	Chr7L:76013179-76013379	1.18764	0.537467
Chr7L	78205421	78205922	L_dist_hi_41832	S	Chr7L:78205518-78205718	0.8079	0.412476	Chr7L:78205498-78205698	1.12238	0.412476
Chr7L	80053020	80053521	L_dist_hi_41850	PS	Chr7L:80053161-80053361	0.847228	0.349981	Chr7L:80053088-80053288	1.01362	0.349981
Chr7L	81608928	81609429	L_dist_hi_41866	S	Chr7L:81609256-81609456	0.335967	0.349981	Chr7L:81609242-81609442	0.578562	0.287486
Chr7L	82517458	82517959	L_dist_hi_41896	PS	Chr7L:82517688-82517888	1.5158	0.1	Chr7L:82517815-82518015	2.25353	0.1
Chr7L	82776191	82776692	L_dist_hi_41907	S	Chr7L:82776223-82776423	0.414622	0.224991	Chr7L:82776587-82776787	0.709079	0.287486
Chr7L	82776603	82777104	L_dist_hi_41908	S	Chr7L:82776673-82776873	0.414622	0.349981	Chr7L:82776587-82776787	0.709079	0.287486
Chr7L	85402478	85402979	L_dist_hi_41946	PS	Chr7L:85402499-85402699	0.729245	0.162495	Chr7L:85402554-85402754	0.904855	0.162495
Chr7L	87438650	87439151	L_dist_hi_41972	S	Chr7L:87438814-87439014	0.650589	0.349981	Chr7L:87438827-87439027	0.861349	0.412476
Chr7L	88847097	88847598	L_dist_hi_41982	S	Chr7L:88847280-88847480	0.611261	0.412476	Chr7L:88847283-88847483	1.07888	0.412476
Chr7L	89091649	89092150	L_dist_hi_41985	PS	Chr7L:89091819-89092019	0.532606	0.162495	Chr7L:89091769-89091969	1.36166	0.224991
Chr7L	90835539	90836040	L_dist_hi_41998	S	Chr7L:90835779-90835979	0.689917	0.474972	Chr7L:90835661-90835861	1.33991	0.474972
Chr7L	90947870	90948371	L_dist_hi_42000	P	Chr7L:90948011-90948211	1.47647	0.412476	Chr7L:90947954-90948154	0.796091	0.474972
Chr7L	90952118	90952619	L_dist_hi_42001	S	Chr7L:90952270-90952470	0.296639	0.1	Chr7L:90952088-90952288	0.970113	0.162495
Chr7L	90954120	90954621	L_dist_hi_42003	S	Chr7L:90954263-90954463	0.650589	0.349981	Chr7L:90954274-90954474	0.817844	0.349981
Chr7L	90954763	90955264	L_dist_hi_42004	PS	Chr7L:90955147-90955347	0.650589	0.224991	Chr7L:90955151-90955351	1.10063	0.224991
Chr7L	90957975	90958476	L_dist_hi_42007	PS	Chr7L:90958093-90958293	0.611261	0.162495	Chr7L:90958175-90958375	0.665574	0.224991
Chr7L	90965621	90966122	L_dist_hi_42010	S	Chr7L:90965668-90965868	0.45395	0.287486	Chr7L:90965631-90965831	0.709079	0.287486
Chr7L	91151305	91151806	L_dist_hi_42012	PS	Chr7L:91151549-91151749	0.886556	0.224991	Chr7L:91151484-91151684	3.21066	0.162495
Chr7L	91295278	91295779	L_dist_hi_42017	S	Chr7L:91295188-91295388	0.45395	0.412476	Chr7L:91295470-91295670	0.926608	0.287486
Chr7L	91917117	91917618	L_dist_hi_42036	S	Chr7L:91917241-91917441	0.532606	0.412476	Chr7L:91917311-91917511	0.817844	0.349981
Chr7L	92290271	92290772	L_dist_hi_42046	PS	Chr7L:92290463-92290663	1.24051	0.349981	Chr7L:92290498-92290698	1.86198	0.287486
Chr1L	214725131	214725632	L_dist_hi_4219	PS	Chr1L:214725117-214725317	0.532606	0.224991	Chr1L:214725284-214725484	0.752585	0.349981
Chr7L	98527013	98527514	L_dist_hi_42195	PS	Chr7L:98527222-98527422	0.571934	0.224991	Chr7L:98527340-98527540	1.36166	0.349981
Chr7L	98550902	98551403	L_dist_hi_42199	PS	Chr7L:98551155-98551355	1.47647	0.287486	Chr7L:98551109-98551309	4.03726	0.287486
Chr7L	103290023	103290524	L_dist_hi_42272	PS	Chr7L:103290357-103290557	0.768572	0.162495	Chr7L:103290351-103290551	4.18953	0.162495
Chr7L	103290578	103291079	L_dist_hi_42273	S	Chr7L:103290658-103290858	0.493278	0.287486	Chr7L:103290532-103290732	1.6662	0.224991
Chr7L	103301710	103302211	L_dist_hi_42278	PS	Chr7L:103301676-103301876	1.08319	0.287486	Chr7L:103301891-103302091	5.10315	0.412476
Chr7L	103303069	103303570	L_dist_hi_42279	PS	Chr7L:103303069-103303269	1.20118	0.474972	Chr7L:103303300-103303500	2.53632	0.162495
Chr7L	103533233	103533734	L_dist_hi_42285	P	Chr7L:103533143-103533343	0.532606	0.162495	Chr7L:103533524-103533724	0.382787	0.287486
Chr7L	103536449	103536950	L_dist_hi_42287	PS	Chr7L:103536617-103536817	0.571934	0.224991	Chr7L:103536676-103536876	0.970113	0.287486
Chr7L	103540806	103541307	L_dist_hi_42290	S	Chr7L:103540746-103540946	0.689917	0.412476	Chr7L:103541151-103541351	0.817844	0.349981
Chr7L	103541475	103541976	L_dist_hi_42292	PS	Chr7L:103541609-103541809	1.43714	0.349981	Chr7L:103541647-103541847	1.79672	0.349981
Chr7L	103542205	103542706	L_dist_hi_42293	S	Chr7L:103542360-103542560	0.375295	0.349981	Chr7L:103542400-103542600	0.817844	0.349981
Chr7L	103771736	103772237	L_dist_hi_42308	S	Chr7L:103771794-103771994	0.257311	0.349981	Chr7L:103771741-103771941	1.05712	0.287486
Chr7L	103789553	103790054	L_dist_hi_42309	S	Chr7L:103789715-103789915	0.925884	0.474972	Chr7L:103789707-103789907	1.92724	0.349981
Chr7L	103791951	103792452	L_dist_hi_42310	S	Chr7L:103792183-103792383	0.532606	0.474972	Chr7L:103792040-103792240	1.29641	0.349981
Chr7L	104048270	104048771	L_dist_hi_42318	S	Chr7L:104048426-104048626	0.45395	0.287486	Chr7L:104048376-104048576	1.73146	0.287486
Chr7L	104071256	104071757	L_dist_hi_42321	PS	Chr7L:104071364-104071564	0.532606	0.162495	Chr7L:104071412-104071612	1.07888	0.162495
Chr7L	104073219	104073720	L_dist_hi_42323	S	Chr7L:104073316-104073516	0.493278	0.287486	Chr7L:104073277-104073477	0.665574	0.224991
Chr7L	104073638	104074139	L_dist_hi_42324	S	Chr7L:104073539-104073739	0.414622	0.349981	Chr7L:104073735-104073935	0.730832	0.287486
Chr7L	104087019	104087520	L_dist_hi_42328	PS	Chr7L:104087155-104087355	1.12252	0.349981	Chr7L:104087093-104087293	3.21066	0.224991
Chr7L	104088496	104088997	L_dist_hi_42329	PS	Chr7L:104088543-104088743	0.650589	0.287486	Chr7L:104088628-104088828	1.31816	0.287486
Chr7L	104090977	104091478	L_dist_hi_42331	PS	Chr7L:104091082-104091282	0.8079	0.162495	Chr7L:104091247-104091447	1.07888	0.162495
Chr7L	107493858	107494359	L_dist_hi_42377	S	Chr7L:107494226-107494426	0.335967	0.287486	Chr7L:107494076-107494276	0.861349	0.162495
Chr7L	108685944	108686445	L_dist_hi_42402	S	Chr7L:108686040-108686240	0.650589	0.349981	Chr7L:108685845-108686045	0.752585	0.349981
Chr7L	111166969	111167470	L_dist_hi_42450	PS	Chr7L:111167124-111167324	1.43714	0.349981	Chr7L:111167210-111167410	2.21003	0.287486
Chr1L	215498735	215499236	L_dist_hi_4252	P	Chr1L:215498813-215499013	0.571934	0.162495	Chr1L:215498846-215499046	0.469798	0.162495
Chr7L	113955837	113956338	L_dist_hi_42525	P	Chr7L:113956100-113956300	0.611261	0.287486	Chr7L:113955747-113955947	0.361034	0.224991
Chr7L	114828683	114829184	L_dist_hi_42538	S	Chr7L:114828710-114828910	0.257311	0.224991	Chr7L:114828600-114828800	0.600315	0.287486
Chr7L	116600161	116600662	L_dist_hi_42573	PS	Chr7L:116600404-116600604	1.08319	0.537467	Chr7L:116600442-116600642	1.97074	0.474972
Chr7L	116699926	116700427	L_dist_hi_42584	PS	Chr7L:116700078-116700278	1.00454	0.412476	Chr7L:116700212-116700412	1.6662	0.287486
Chr7L	116701564	116702065	L_dist_hi_42585	PS	Chr7L:116701652-116701852	0.925884	0.349981	Chr7L:116701534-116701734	2.53632	0.349981
Chr7L	116727495	116727996	L_dist_hi_42591	PS	Chr7L:116727645-116727845	1.24051	0.412476	Chr7L:116727583-116727783	1.42692	0.349981
Chr7L	116730379	116730880	L_dist_hi_42594	PS	Chr7L:116730615-116730815	1.94841	0.349981	Chr7L:116730588-116730788	3.9285	0.349981
Chr7L	117545958	117546459	L_dist_hi_42628	PS	Chr7L:117546259-117546459	1.90908	0.474972	Chr7L:117546216-117546416	2.7756	0.474972
Chr7L	117906349	117906850	L_dist_hi_42643	S	Chr7L:117906581-117906781	0.375295	0.224991	Chr7L:117906686-117906886	0.622068	0.224991
Chr7L	119047491	119047992	L_dist_hi_42664	PS	Chr7L:119047627-119047827	0.965211	0.412476	Chr7L:119047653-119047853	1.79672	0.474972
Chr7L	120385858	120386359	L_dist_hi_42718	S	Chr7L:120386109-120386309	0.45395	0.287486	Chr7L:120385979-120386179	0.839596	0.162495
Chr7L	120392762	120393263	L_dist_hi_42719	S	Chr7L:120392816-120393016	0.414622	0.287486	Chr7L:120392672-120392872	0.970113	0.224991
Chr7L	120464285	120464786	L_dist_hi_42725	S	Chr7L:120464340-120464540	0.375295	0.287486	Chr7L:120464461-120464661	1.16589	0.224991
Chr7L	120466910	120467411	L_dist_hi_42727	S	Chr7L:120467011-120467211	0.375295	0.224991	Chr7L:120466985-120467185	1.36166	0.287486
Chr7L	122790028	122790529	L_dist_hi_42755	PS	Chr7L:122790275-122790475	0.847228	0.349981	Chr7L:122790417-122790617	1.33991	0.224991
Chr7L	122803610	122804111	L_dist_hi_42758	S	Chr7L:122803690-122803890	0.611261	0.474972	Chr7L:122803763-122803963	1.84023	0.412476
Chr7L	123612412	123612913	L_dist_hi_42774	PS	Chr7L:123612730-123612930	0.532606	0.224991	Chr7L:123612582-123612782	1.20939	0.287486
Chr7L	123761115	123761616	L_dist_hi_42779	S	Chr7L:123761267-123761467	0.375295	0.287486	Chr7L:123761326-123761526	1.01362	0.349981
Chr1L	216590190	216590691	L_dist_hi_4278	PS	Chr1L:216590351-216590551	0.965211	0.287486	Chr1L:216590191-216590391	1.79672	0.412476
Chr7L	123833152	123833653	L_dist_hi_42785	S	Chr7L:123833479-123833679	0.611261	0.349981	Chr7L:123833305-123833505	1.07888	0.349981
Chr7L	126870063	126870564	L_dist_hi_42815	P	Chr7L:126870255-126870455	0.571934	0.1	Chr7L:126870133-126870333	0.426293	0.162495
Chr7L	126872611	126873112	L_dist_hi_42817	PS	Chr7L:126872726-126872926	1.12252	0.287486	Chr7L:126872732-126872932	1.47043	0.287486
Chr7L	127805263	127805764	L_dist_hi_42832	S	Chr7L:127805432-127805632	0.375295	0.224991	Chr7L:127805454-127805654	1.75322	0.224991
Chr7L	130553471	130553972	L_dist_hi_42855	S	Chr7L:130553514-130553714	0.257311	0.224991	Chr7L:130553629-130553829	1.51393	0.224991
Chr7L	133000554	133001055	L_dist_hi_42896	S	Chr7L:133000877-133001077	0.493278	0.287486	Chr7L:133000681-133000881	1.68796	0.1
Chr7L	134988213	134988714	L_dist_hi_42923	S	Chr7L:134988114-134988314	0.296639	0.224991	Chr7L:134988363-134988563	1.12238	0.349981
Chr7L	135008069	135008570	L_dist_hi_42929	P	Chr7L:135008069-135008269	0.650589	0.162495	Chr7L:135008211-135008411	0.513304	0.349981
Chr7L	135129301	135129802	L_dist_hi_42948	S	Chr7L:135129336-135129536	0.375295	0.1	Chr7L:135129512-135129712	0.904855	0.224991
Chr7L	137539972	137540473	L_dist_hi_43089	PS	Chr7L:137540243-137540443	0.965211	0.162495	Chr7L:137540132-137540332	1.49218	0.1
Chr7L	137572502	137573003	L_dist_hi_43104	PS	Chr7L:137572764-137572964	0.689917	0.224991	Chr7L:137572740-137572940	0.839596	0.224991
Chr7L	137780790	137781291	L_dist_hi_43133	S	Chr7L:137780841-137781041	0.414622	0.162495	Chr7L:137780901-137781101	0.535057	0.162495
Chr7L	138841752	138842253	L_dist_hi_43235	S	Chr7L:138841775-138841975	0.45395	0.349981	Chr7L:138841908-138842108	1.47043	0.349981
Chr1L	218808237	218808738	L_dist_hi_4324	PS	Chr1L:218808582-218808782	0.650589	0.224991	Chr1L:218808503-218808703	0.622068	0.224991
Chr1L	218808824	218809325	L_dist_hi_4325	PS	Chr1L:218808985-218809185	0.532606	0.224991	Chr1L:218809026-218809226	1.84023	0.224991
Chr1L	218938034	218938535	L_dist_hi_4329	S	Chr1L:218938234-218938434	0.571934	0.287486	Chr1L:218938288-218938488	0.883102	0.349981
Chr7L	139171302	139171803	L_dist_hi_43294	PS	Chr7L:139171335-139171535	0.532606	0.224991	Chr7L:139171439-139171639	0.926608	0.162495
Chr1L	220254431	220254932	L_dist_hi_4366	S	Chr1L:220254442-220254642	0.729245	0.474972	Chr1L:220254477-220254677	1.01362	0.412476
Chr1L	222112677	222113178	L_dist_hi_4395	S	Chr1L:222112790-222112990	0.414622	0.287486	Chr1L:222112903-222113103	0.752585	0.224991
Chr1L	678176	678677	L_dist_hi_44	PS	Chr1L:678178-678378	0.8079	0.287486	Chr1L:678365-678565	0.991866	0.287486
Chr1L	224884164	224884665	L_dist_hi_4505	PS	Chr1L:224884074-224884274	0.847228	0.162495	Chr1L:224884094-224884294	2.90612	0.162495
Chr1L	227388464	227388965	L_dist_hi_4538	S	Chr1L:227388697-227388897	0.45395	0.412476	Chr1L:227388768-227388968	1.77497	0.349981
Chr1L	228556714	228557215	L_dist_hi_4552	P	Chr1L:228557012-228557212	0.729245	0.1	Chr1L:228557067-228557267	0.361034	0.162495
Chr8L	558555	559056	L_dist_hi_45626	S	Chr8L:558622-558822	0.217983	0.349981	Chr8L:558734-558934	1.23115	0.349981
Chr8L	910407	910908	L_dist_hi_45711	PS	Chr8L:910308-910508	1.08319	0.349981	Chr8L:910491-910691	1.84023	0.349981
Chr8L	911060	911561	L_dist_hi_45712	PS	Chr8L:911107-911307	1.24051	0.287486	Chr8L:911151-911351	1.88373	0.349981
Chr8L	915035	915536	L_dist_hi_45716	PS	Chr8L:915035-915235	0.532606	0.224991	Chr8L:914945-915145	0.904855	0.224991
Chr8L	917302	917803	L_dist_hi_45719	PS	Chr8L:917401-917601	0.650589	0.224991	Chr8L:917375-917575	0.817844	0.224991
Chr8L	1107918	1108419	L_dist_hi_45753	PS	Chr8L:1108036-1108236	0.689917	0.224991	Chr8L:1108027-1108227	1.40517	0.224991
Chr8L	1108768	1109269	L_dist_hi_45754	S	Chr8L:1108911-1109111	0.335967	0.287486	Chr8L:1108936-1109136	1.38342	0.287486
Chr8L	1133227	1133728	L_dist_hi_45765	S	Chr8L:1133196-1133396	0.45395	0.287486	Chr8L:1133337-1133537	1.2529	0.474972
Chr8L	1134384	1134885	L_dist_hi_45767	S	Chr8L:1134285-1134485	0.571934	0.287486	Chr8L:1134466-1134666	1.12238	0.224991
Chr8L	1834348	1834849	L_dist_hi_45900	PS	Chr8L:1834456-1834656	0.611261	0.287486	Chr8L:1834496-1834696	1.14414	0.287486
Chr8L	1895001	1895502	L_dist_hi_45911	S	Chr8L:1894938-1895138	0.493278	0.224991	Chr8L:1895146-1895346	0.578562	0.287486
Chr8L	2294588	2295089	L_dist_hi_45951	S	Chr8L:2294588-2294788	0.493278	0.349981	Chr8L:2294623-2294823	1.94899	0.412476
Chr8L	2295715	2296216	L_dist_hi_45952	PS	Chr8L:2295774-2295974	0.965211	0.287486	Chr8L:2296000-2296200	0.752585	0.287486
Chr8L	2297913	2298414	L_dist_hi_45954	PS	Chr8L:2298133-2298333	0.847228	0.224991	Chr8L:2298157-2298357	0.687327	0.287486
Chr8L	2298173	2298674	L_dist_hi_45955	PS	Chr8L:2298173-2298373	0.925884	0.287486	Chr8L:2298559-2298759	0.796091	0.287486
Chr8L	2302368	2302869	L_dist_hi_45959	PS	Chr8L:2302631-2302831	1.27983	0.349981	Chr8L:2302628-2302828	1.90549	0.349981
Chr8L	2325267	2325768	L_dist_hi_45966	P	Chr8L:2325625-2325825	0.571934	0.162495	Chr8L:2325660-2325860	0.448045	0.162495
Chr8L	2326182	2326683	L_dist_hi_45967	PS	Chr8L:2326543-2326743	0.965211	0.349981	Chr8L:2326361-2326561	2.05776	0.412476
Chr8L	4325837	4326338	L_dist_hi_46063	S	Chr8L:4325898-4326098	0.45395	0.1	Chr8L:4326012-4326212	0.904855	0.1
Chr8L	7314096	7314597	L_dist_hi_46145	PS	Chr8L:7314221-7314421	2.06639	0.787448	Chr8L:7314338-7314538	2.25353	0.912439
Chr8L	7317620	7318121	L_dist_hi_46147	PS	Chr8L:7317765-7317965	0.847228	0.224991	Chr8L:7317767-7317967	0.730832	0.224991
Chr8L	7589100	7589601	L_dist_hi_46174	PS	Chr8L:7589038-7589238	0.847228	0.224991	Chr8L:7589001-7589201	0.752585	0.287486
Chr8L	7981475	7981976	L_dist_hi_46188	P	Chr8L:7981532-7981732	0.532606	0.224991	Chr8L:7981465-7981665	0.448045	0.224991
Chr8L	10347631	10348132	L_dist_hi_46257	S	Chr8L:10347709-10347909	0.650589	0.474972	Chr8L:10347688-10347888	2.05776	0.474972
Chr8L	12438328	12438829	L_dist_hi_46355	S	Chr8L:12438547-12438747	0.335967	0.287486	Chr8L:12438696-12438896	0.643821	0.287486
Chr8L	12438590	12439091	L_dist_hi_46356	S	Chr8L:12438590-12438790	0.414622	0.349981	Chr8L:12438797-12438997	0.665574	0.287486
Chr8L	13226803	13227304	L_dist_hi_46387	S	Chr8L:13227046-13227246	1.00454	0.662457	Chr8L:13227003-13227203	2.53632	0.724953
Chr8L	14891960	14892461	L_dist_hi_46418	PS	Chr8L:14891970-14892170	1.71244	0.412476	Chr8L:14891970-14892170	3.23241	0.412476
Chr8L	14895208	14895709	L_dist_hi_46419	PS	Chr8L:14895490-14895690	2.45967	0.224991	Chr8L:14895319-14895519	3.5152	0.162495
Chr8L	14895901	14896402	L_dist_hi_46420	PS	Chr8L:14895854-14896054	1.39782	0.412476	Chr8L:14895802-14896002	2.68859	0.287486
Chr8L	14903443	14903944	L_dist_hi_46423	PS	Chr8L:14903572-14903772	0.689917	0.162495	Chr8L:14903584-14903784	0.904855	0.162495
Chr8L	14955798	14956299	L_dist_hi_46433	PS	Chr8L:14956031-14956231	0.611261	0.287486	Chr8L:14955946-14956146	0.839596	0.224991
Chr8L	17882522	17883023	L_dist_hi_46459	PS	Chr8L:17882575-17882775	1.12252	0.349981	Chr8L:17882502-17882702	1.6662	0.349981
Chr8L	18242576	18243077	L_dist_hi_46463	S	Chr8L:18242776-18242976	0.335967	0.287486	Chr8L:18242967-18243167	1.31816	0.412476
Chr8L	24606536	24607037	L_dist_hi_46600	PS	Chr8L:24606689-24606889	1.16185	0.474972	Chr8L:24606669-24606869	2.66683	0.474972
Chr8L	24854783	24855284	L_dist_hi_46605	S	Chr8L:24854970-24855170	0.650589	0.349981	Chr8L:24855073-24855273	1.05712	0.224991
Chr8L	25035883	25036384	L_dist_hi_46615	S	Chr8L:25035895-25036095	0.886556	0.474972	Chr8L:25035922-25036122	1.79672	0.537467
Chr8L	27702028	27702529	L_dist_hi_46666	PS	Chr8L:27702226-27702426	0.886556	0.287486	Chr8L:27702139-27702339	1.51393	0.224991
Chr8L	28616140	28616641	L_dist_hi_46672	S	Chr8L:28616070-28616270	0.375295	0.287486	Chr8L:28616057-28616257	0.796091	0.287486
Chr8L	33685342	33685843	L_dist_hi_46724	P	Chr8L:33685419-33685619	0.886556	0.287486	Chr8L:33685420-33685620	0.25227	0.287486
Chr8L	34305442	34305943	L_dist_hi_46742	S	Chr8L:34305579-34305779	0.689917	0.412476	Chr8L:34305833-34306033	1.42692	0.537467
Chr8L	35522365	35522866	L_dist_hi_46780	PS	Chr8L:35522570-35522770	0.8079	0.224991	Chr8L:35522493-35522693	1.79672	0.224991
Chr8L	37382907	37383408	L_dist_hi_46828	P	Chr8L:37383185-37383385	0.886556	0.224991	Chr8L:37382844-37383044	0.230517	0.162495
Chr8L	38457969	38458470	L_dist_hi_46853	PS	Chr8L:38458140-38458340	0.532606	0.224991	Chr8L:38458077-38458277	1.20939	0.224991
Chr8L	40084187	40084688	L_dist_hi_46876	PS	Chr8L:40084241-40084441	1.59446	0.474972	Chr8L:40084200-40084400	1.68796	0.474972
Chr8L	40086628	40087129	L_dist_hi_46877	PS	Chr8L:40086987-40087187	0.611261	0.162495	Chr8L:40087006-40087206	0.796091	0.162495
Chr8L	40090097	40090598	L_dist_hi_46883	S	Chr8L:40090148-40090348	0.571934	0.287486	Chr8L:40090281-40090481	0.600315	0.224991
Chr8L	40191502	40192003	L_dist_hi_46888	S	Chr8L:40191603-40191803	0.45395	0.412476	Chr8L:40191603-40191803	1.42692	0.412476
Chr8L	41551995	41552496	L_dist_hi_46894	S	Chr8L:41552333-41552533	0.532606	0.412476	Chr8L:41552093-41552293	0.883102	0.349981
Chr8L	42617095	42617596	L_dist_hi_46933	PS	Chr8L:42617457-42617657	0.8079	0.1	Chr8L:42617494-42617694	0.709079	0.162495
Chr8L	43782937	43783438	L_dist_hi_46946	S	Chr8L:43782993-43783193	0.650589	0.349981	Chr8L:43782947-43783147	1.86198	0.349981
Chr8L	44294760	44295261	L_dist_hi_46952	S	Chr8L:44294685-44294885	0.571934	0.412476	Chr8L:44294933-44295133	1.31816	0.349981
Chr8L	44951347	44951848	L_dist_hi_46956	S	Chr8L:44951381-44951581	0.45395	0.162495	Chr8L:44951524-44951724	0.622068	0.224991
Chr8L	44952863	44953364	L_dist_hi_46957	PS	Chr8L:44953051-44953251	1.27983	0.162495	Chr8L:44952994-44953194	1.90549	0.1
Chr8L	45996565	45997066	L_dist_hi_46960	PS	Chr8L:45996709-45996909	0.768572	0.162495	Chr8L:45996749-45996949	0.709079	0.162495
Chr8L	46961269	46961770	L_dist_hi_46973	PS	Chr8L:46961278-46961478	0.689917	0.162495	Chr8L:46961374-46961574	0.817844	0.1
Chr8L	46967789	46968290	L_dist_hi_46974	PS	Chr8L:46967941-46968141	1.08319	0.224991	Chr8L:46967915-46968115	0.817844	0.224991
Chr8L	46976361	46976862	L_dist_hi_46975	S	Chr8L:46976727-46976927	0.965211	0.787448	Chr8L:46976762-46976962	1.6662	0.662457
Chr8L	46976724	46977225	L_dist_hi_46976	S	Chr8L:46976727-46976927	0.965211	0.787448	Chr8L:46976762-46976962	1.6662	0.662457
Chr8L	46994974	46995475	L_dist_hi_46980	PS	Chr8L:46995059-46995259	0.768572	0.287486	Chr8L:46995127-46995327	0.926608	0.349981
Chr8L	49887267	49887768	L_dist_hi_47002	PS	Chr8L:49887424-49887624	3.87547	0.412476	Chr8L:49887454-49887654	5.47295	0.349981
Chr8L	49887606	49888107	L_dist_hi_47003	PS	Chr8L:49887565-49887765	3.71816	0.349981	Chr8L:49887507-49887707	5.25542	0.349981
Chr8L	49891033	49891534	L_dist_hi_47004	S	Chr8L:49891106-49891306	0.532606	0.287486	Chr8L:49891277-49891477	0.796091	0.349981
Chr8L	49893422	49893923	L_dist_hi_47006	S	Chr8L:49893617-49893817	0.414622	0.1	Chr8L:49893752-49893952	0.665574	0.162495
Chr8L	50339660	50340161	L_dist_hi_47018	S	Chr8L:50339660-50339860	0.257311	0.287486	Chr8L:50339890-50340090	0.600315	0.224991
Chr8L	50425931	50426432	L_dist_hi_47022	S	Chr8L:50426279-50426479	0.611261	0.349981	Chr8L:50426147-50426347	1.12238	0.349981
Chr8L	51415501	51416002	L_dist_hi_47042	S	Chr8L:51415514-51415714	0.768572	0.474972	Chr8L:51415580-51415780	1.36166	0.474972
Chr8L	56320294	56320795	L_dist_hi_47100	PS	Chr8L:56320294-56320494	1.31916	0.162495	Chr8L:56320467-56320667	1.60095	0.162495
Chr8L	56722963	56723464	L_dist_hi_47105	S	Chr8L:56723094-56723294	0.493278	0.287486	Chr8L:56723220-56723420	1.64445	0.287486
Chr8L	56723272	56723773	L_dist_hi_47106	S	Chr8L:56723594-56723794	0.768572	0.412476	Chr8L:56723220-56723420	1.64445	0.287486
Chr8L	57421326	57421827	L_dist_hi_47130	S	Chr8L:57421727-57421927	0.414622	0.287486	Chr8L:57421443-57421643	1.31816	0.162495
Chr8L	60526273	60526774	L_dist_hi_47182	S	Chr8L:60526328-60526528	0.45395	0.287486	Chr8L:60526400-60526600	0.839596	0.349981
Chr8L	60590896	60591397	L_dist_hi_47195	P	Chr8L:60590992-60591192	1.12252	0.474972	Chr8L:60591083-60591283	0.904855	0.537467
Chr8L	61246773	61247274	L_dist_hi_47217	PS	Chr8L:61246961-61247161	0.689917	0.287486	Chr8L:61247021-61247221	1.01362	0.287486
Chr8L	61254955	61255456	L_dist_hi_47218	S	Chr8L:61254856-61255056	0.375295	0.474972	Chr8L:61254982-61255182	1.03537	0.349981
Chr8L	61460397	61460898	L_dist_hi_47223	PS	Chr8L:61460523-61460723	0.8079	0.349981	Chr8L:61460589-61460789	1.51393	0.412476
Chr8L	61516851	61517352	L_dist_hi_47226	PS	Chr8L:61516780-61516980	0.847228	0.287486	Chr8L:61516901-61517101	2.29704	0.224991
Chr8L	62246919	62247420	L_dist_hi_47238	S	Chr8L:62247095-62247295	0.729245	0.599962	Chr8L:62247096-62247296	1.20939	0.599962
Chr8L	62916128	62916629	L_dist_hi_47265	S	Chr8L:62916055-62916255	0.532606	0.412476	Chr8L:62916223-62916423	0.970113	0.412476
Chr8L	63035522	63036023	L_dist_hi_47272	S	Chr8L:63035438-63035638	0.414622	0.224991	Chr8L:63035700-63035900	1.29641	0.224991
Chr8L	63645090	63645591	L_dist_hi_47298	PS	Chr8L:63645423-63645623	0.571934	0.1	Chr8L:63645237-63645437	0.665574	0.287486
Chr8L	67069952	67070453	L_dist_hi_47382	S	Chr8L:67070053-67070253	0.45395	0.1	Chr8L:67070211-67070411	0.622068	0.162495
Chr8L	68732380	68732881	L_dist_hi_47401	S	Chr8L:68732404-68732604	0.375295	0.412476	Chr8L:68732454-68732654	1.42692	0.474972
Chr8L	68734631	68735132	L_dist_hi_47402	PS	Chr8L:68734772-68734972	0.965211	0.224991	Chr8L:68734813-68735013	1.55744	0.287486
Chr8L	69037414	69037915	L_dist_hi_47421	S	Chr8L:69037620-69037820	0.493278	0.287486	Chr8L:69037592-69037792	0.643821	0.287486
Chr8L	69538971	69539472	L_dist_hi_47435	S	Chr8L:69538913-69539113	0.178656	0.162495	Chr8L:69539062-69539262	0.904855	0.162495
Chr8L	69652130	69652631	L_dist_hi_47441	S	Chr8L:69652371-69652571	0.571934	0.412476	Chr8L:69652243-69652443	1.60095	0.599962
Chr8L	69660945	69661446	L_dist_hi_47442	PS	Chr8L:69661072-69661272	1.08319	0.349981	Chr8L:69661053-69661253	2.23178	0.349981
Chr8L	69661168	69661669	L_dist_hi_47443	PS	Chr8L:69661072-69661272	1.08319	0.349981	Chr8L:69661320-69661520	2.14477	0.224991
Chr8L	69934963	69935464	L_dist_hi_47454	S	Chr8L:69934994-69935194	0.650589	0.349981	Chr8L:69935119-69935319	1.16589	0.349981
Chr8L	70107980	70108481	L_dist_hi_47467	PS	Chr8L:70107989-70108189	0.611261	0.287486	Chr8L:70108005-70108205	1.6227	0.349981
Chr8L	70938159	70938660	L_dist_hi_47481	PS	Chr8L:70938295-70938495	1.35849	0.224991	Chr8L:70938203-70938403	1.57919	0.224991
Chr8L	72709923	72710424	L_dist_hi_47518	P	Chr8L:72710066-72710266	1.08319	0.162495	Chr8L:72709963-72710163	0.469798	0.224991
Chr8L	72734328	72734829	L_dist_hi_47523	PS	Chr8L:72734425-72734625	2.14505	0.662457	Chr8L:72734507-72734707	3.66747	0.724953
Chr8L	72995248	72995749	L_dist_hi_47526	S	Chr8L:72995339-72995539	0.729245	0.412476	Chr8L:72995189-72995389	2.36229	0.224991
Chr8L	72995905	72996406	L_dist_hi_47527	PS	Chr8L:72996168-72996368	0.611261	0.287486	Chr8L:72996037-72996237	1.57919	0.349981
Chr8L	72997932	72998433	L_dist_hi_47529	S	Chr8L:72997934-72998134	0.45395	0.349981	Chr8L:72998255-72998455	1.6662	0.1
Chr8L	73500455	73500956	L_dist_hi_47559	S	Chr8L:73500367-73500567	0.414622	0.224991	Chr8L:73500396-73500596	0.774338	0.224991
Chr8L	74398689	74399190	L_dist_hi_47601	S	Chr8L:74398867-74399067	0.571934	0.287486	Chr8L:74398828-74399028	0.643821	0.224991
Chr8L	76766757	76767258	L_dist_hi_47627	S	Chr8L:76766936-76767136	0.768572	0.474972	Chr8L:76766884-76767084	1.10063	0.412476
Chr8L	77219037	77219538	L_dist_hi_47642	S	Chr8L:77218949-77219149	0.296639	0.287486	Chr8L:77219095-77219295	0.622068	0.287486
Chr8L	77345805	77346306	L_dist_hi_47650	S	Chr8L:77346111-77346311	0.375295	0.224991	Chr8L:77346090-77346290	0.904855	0.224991
Chr8L	78238105	78238606	L_dist_hi_47674	S	Chr8L:78238319-78238519	0.45395	0.287486	Chr8L:78238236-78238436	1.2529	0.287486
Chr8L	78477603	78478104	L_dist_hi_47683	PS	Chr8L:78477767-78477967	1.04387	0.287486	Chr8L:78477632-78477832	1.14414	0.287486
Chr8L	79342823	79343324	L_dist_hi_47709	S	Chr8L:79343162-79343362	0.571934	0.349981	Chr8L:79342881-79343081	1.49218	0.349981
Chr8L	81571959	81572460	L_dist_hi_47754	PS	Chr8L:81571916-81572116	0.847228	0.162495	Chr8L:81572067-81572267	2.23178	0.162495
Chr8L	84064486	84064987	L_dist_hi_47792	PS	Chr8L:84064396-84064596	0.8079	0.349981	Chr8L:84064528-84064728	0.643821	0.287486
Chr8L	85396469	85396970	L_dist_hi_47808	S	Chr8L:85396604-85396804	0.45395	0.162495	Chr8L:85396748-85396948	1.16589	0.287486
[truncated: 9,146 more rows]

## Sheet: C. Homeologous enh regions
ID	chr.L	start.L	end.L	Enh_id.L	chr.S	start.S	end.S	Enh_id.S
[truncated: 31,159 more rows]

## Sheet: Legend
Column	Description
[truncated: 29 more rows]
