# Supplementary material for: Hybridization led to a rewired pluripotency network in the allotetraploid Xenopus laevis
Source: eLife. 2023 Oct 3;12:e83952. doi: 10.7554/eLife.83952 (PMC10569791; doi:10.7554/eLife.83952)
Supplement: Supplementary file 6. [file elife-83952-supp6.xlsx]

## Sheet: A. Homology
Gene	Homeo_status	Geneid.L	s5_tpm.L	s9_tpm.L	Confident_activated.L	Confident_firstwave.L	PouSox_effect.L	CHX_PouSox_effect.L	Geneid.S	s5_tpm.S	s9_tpm.S	Confident_activated.S	Confident_firstwave.S	PouSox_effect.S	CHX_PouSox_effect.S	Geneid.T	s5_tpm.T	s9_tpm.T	Jgi_anno.T	Embryonic.T	Activated.T	PouSox_effect.T	Geneid.Z	Symbol.Z	w2h_tpm.Z	w4h_tpm.Z	w6h_tpm.Z	Embryonic.Z	Firstwave.Z	Activated_w4h.Z	Activated_w6h.Z	PouSox_affected.Z	NanogPouSox_affected.Z
42sp43	L	gene472	92.15	66.475	.	.	.	.	NA	NA	NA	NA	NA	NA	NA	XBXT10g005857	166.888	186.761	.	X	NA	NA	ENSDARG00000104170	si:dkey-208k4.2	390.478	213.268	9.392	X	.	.	.	.	.
42sp50	L	gene16313	17.95	19.918	.	.	.	.	NA	NA	NA	NA	NA	NA	NA	XBXT10g009113	98.18	91.069	.	X	NA	NA	NA	NA	NA	NA	NA	NA	NA	NA	NA	NA	NA
a1cf	L	gene40139	0	0	.	.	.	.	NA	NA	NA	NA	NA	NA	NA	XBXT10g006797	0	0	X	.	.	.	ENSDARG00000002968	a1cf	0	0	29.341	X	.	.	X	.	.
a2m	LS	gene7104	0	0.016	.	.	.	.	gene50021	0	6.77	X	X	D	D	XBXT10g006223	0.015	0.021	X	.	.	.	NA	NA	NA	NA	NA	NA	NA	NA	NA	NA	NA
a2ml1	L	gene43170	0	0	.	.	.	.	NA	NA	NA	NA	NA	NA	NA	XBXT10g014493	0.23	0.19	X	.	.	.	NA	NA	NA	NA	NA	NA	NA	NA	NA	NA	NA
a4galt	L	gene36761	0	0.072	.	.	.	.	NA	NA	NA	NA	NA	NA	NA	XBXT10g001654	0.064	0.089	X	.	.	.	NA	NA	NA	NA	NA	NA	NA	NA	NA	NA	NA
a4gnt	L	gene14060	0	0	.	.	.	.	NA	NA	NA	NA	NA	NA	NA	XBXT10g014126	0	2.967	X	X	.	.	NA	NA	NA	NA	NA	NA	NA	NA	NA	NA	NA
aaas	L	gene14659	59.88	63.257	.	.	.	.	NA	NA	NA	NA	NA	NA	NA	XBXT10g015650	105.704	99.916	X	X	.	.	ENSDARG00000102274	aaas	67.014	47.494	9.686	X	.	.	.	.	.
aacs	LS	gene6720	0.054	0.03	.	.	.	D	gene38601	8.333	10.812	.	.	.	D	XBXT10g006572	26.54	31.878	X	X	.	.	ENSDARG00000012468	aacs	96.061	79.484	11.499	X	.	.	.	.	.
aadac	LS	gene42228	0	0	.	.	.	.	gene2952	0.243	0.057	.	.	.	.	XBXT10g017386	0.584	0.381	X	.	.	.	ENSDARG00000063621	aadac	0	0.095	0	.	.	.	.	.	.
aadat	LS	gene13311	0.086	0.083	.	.	.	D	gene17129	12.355	4.682	.	.	.	.	XBXT10g001200	15.134	9.175	X	X	.	.	NA	NA	NA	NA	NA	NA	NA	NA	NA	NA	NA
aagab	LS	gene1693	31.253	19.5	.	.	D	.	gene11287	28.44	23.051	.	.	.	.	XBXT10g001433	78.21	57.562	X	X	X	U	ENSDARG00000041170	aagab	67.074	83.582	27.118	X	.	.	.	.	.
aamp	LS	gene3807	45.111	35.46	.	.	.	.	gene8875	41.311	35.119	.	.	.	.	XBXT10g011174	179.805	130.599	X	X	.	.	ENSDARG00000045019	aamp	55.812	33.732	22.303	X	.	.	.	.	.
aanat	LS	gene4717	0.005	0.013	.	.	.	.	gene10474	0	0	.	.	.	.	XBXT10g001283	0	0.082	X	.	.	.	ENSDARG00000079802	aanat2	2.484	2.124	0	X	.	.	.	.	.
aar2	L	gene16361	28.067	29.663	.	.	.	.	NA	NA	NA	NA	NA	NA	NA	XBXT10g009058	15.502	11.354	X	X	.	.	ENSDARG00000018658	aar2	33.921	12.56	5.822	X	.	.	.	.	.
aars1	S	NA	NA	NA	NA	NA	NA	NA	gene5928	103.273	95.982	.	.	.	.	XBXT10g012977	73.819	74.719	X	X	.	.	ENSDARG00000069142	aars1	123.86	138.75	92.51	X	.	.	X	.	.
aarsd1	L	gene5048	8.134	9.722	.	.	.	.	NA	NA	NA	NA	NA	NA	NA	XBXT10g015191	32.323	16.596	X	X	X	U	ENSDARG00000015747	aarsd1	12.056	17.936	6.272	X	.	.	.	.	.
aasdh	L	gene6246	3.383	3.591	.	.	.	.	NA	NA	NA	NA	NA	NA	NA	XBXT10g013428	6.147	5.936	X	X	.	.	ENSDARG00000022730	aasdh	17.073	11.69	3.795	X	.	.	.	.	.
aasdhppt	S	NA	NA	NA	NA	NA	NA	NA	gene14374	18.851	5.282	.	.	.	.	XBXT10g016400	10.698	9.246	X	X	.	.	ENSDARG00000037501	aasdhppt	4.977	0.993	3.255	X	.	.	.	.	.
aass	L	gene41776	60.737	51.964	.	.	.	.	NA	NA	NA	NA	NA	NA	NA	XBXT10g000280	121.329	121.207	X	X	.	.	ENSDARG00000051816	aass	27.455	22.955	7.37	X	.	.	.	.	.
aatf	S	NA	NA	NA	NA	NA	NA	NA	gene9782	70.901	65.438	.	.	.	.	XBXT10g013051	49.734	47.974	X	X	X	U	ENSDARG00000025467	aatf	75.028	67.239	58.816	X	.	.	X	.	.
aatk	LS	gene42999	0	0	.	.	.	.	gene39229	0.062	0.072	.	.	.	.	XBXT10g005208	1.797	2.108	X	X	.	.	NA	NA	NA	NA	NA	NA	NA	NA	NA	NA	NA
abat	LS	gene43390	48.68	60.065	.	.	.	.	gene9728	5.642	13.636	.	.	.	.	XBXT10g000990	35.342	41.402	X	X	.	.	ENSDARG00000006031	abat	52.408	59.491	27.752	X	.	.	X	.	.
abca1	LS	gene35239	2.22	1.511	.	.	.	D	gene14999	0.341	0.479	.	.	.	D	XBXT10g011849	0.849	1.778	X	X	X	.	ENSDARG00000079009, ENSDARG00000074635	abca1b, abca1a	0	0.449	67.724	X	.	X	X	.	X
abca12	S	NA	NA	NA	NA	NA	NA	NA	gene8700	0.365	2.114	.	.	.	.	XBXT10g008272	0.009	0.021	X	.	.	.	ENSDARG00000074749	abca12	1.257	0.303	2.932	X	.	.	X	.	.
abca2	L	gene48710	3.905	4.144	.	.	.	D	NA	NA	NA	NA	NA	NA	NA	XBXT10g002345	1.481	1.608	X	X	.	.	ENSDARG00000013500	abca2	0.606	3.743	1.681	X	.	.	.	.	.
abca3	LS	gene1053	16.703	19.603	.	.	.	.	gene9616	13.498	12.769	.	.	.	.	XBXT10g001392	8.442	9.391	X	X	.	.	NA	NA	NA	NA	NA	NA	NA	NA	NA	NA	NA
abca4	L	gene44766	0.061	0.363	.	.	.	D	NA	NA	NA	NA	NA	NA	NA	XBXT10g004385	0.193	0.164	X	.	.	.	NA	NA	NA	NA	NA	NA	NA	NA	NA	NA	NA
abca5	LS	gene2948	0.073	0.222	.	.	.	.	gene16889	4.822	4.166	.	.	.	.	XBXT10g012081	0.374	0.435	X	.	.	.	ENSDARG00000074041	abca5	157.231	85.502	38.658	X	.	.	.	.	.
abca8	L	gene6817	1.078	1.168	.	.	.	.	NA	NA	NA	NA	NA	NA	NA	XBXT10g011350	0.878	0.906	X	.	.	.	NA	NA	NA	NA	NA	NA	NA	NA	NA	NA	NA
abcb11.2	LS	gene40397	0	0	.	.	.	.	gene2235	0	0.021	.	.	.	.	XBXT10g006714	0.065	0.055	X	.	.	.	NA	NA	NA	NA	NA	NA	NA	NA	NA	NA	NA
abcb6	L	gene11161	29.62	27.757	.	.	.	.	NA	NA	NA	NA	NA	NA	NA	XBXT10g003277	13.95	11.709	X	X	.	.	ENSDARG00000074254, ENSDARG00000063297	abcb6b, abcb6a	193.29	191.173	162.303	X	.	.	X	.	.
abcb7	L	gene4927	23.156	22.638	.	.	.	.	NA	NA	NA	NA	NA	NA	NA	XBXT10g015884	21.736	21.089	X	X	.	.	ENSDARG00000062795	abcb7	85.307	92.483	40.213	X	.	.	.	.	.
abcb9	L	gene740	5.501	7.018	X	X	D	D	NA	NA	NA	NA	NA	NA	NA	XBXT10g011028	1.118	0.91	X	X	X	D	ENSDARG00000056200	abcb9	0	1.307	0.13	X	.	.	.	.	.
abcc1	L	gene20417	34.134	28.424	.	.	.	.	NA	NA	NA	NA	NA	NA	NA	XBXT10g010776	41.395	40.569	X	X	.	.	NA	NA	NA	NA	NA	NA	NA	NA	NA	NA	NA
abcc10	L	gene14261	10.755	13.164	.	.	.	.	NA	NA	NA	NA	NA	NA	NA	XBXT10g014879	4.848	5.107	X	X	.	.	ENSDARG00000077988	abcc10	75.582	45.989	7.893	X	.	.	.	.	.
abcc2	L	gene2348	0.011	0	.	.	.	.	NA	NA	NA	NA	NA	NA	NA	XBXT10g010038	0.073	0.101	X	.	.	.	ENSDARG00000014031	abcc2	0	0	0.367	.	.	.	.	.	.
abcc3	LS	gene49110	0.042	0.03	.	.	.	.	gene12066	0.675	0.143	.	.	.	.	XBXT10g011672	0.386	0.479	X	.	.	.	ENSDARG00000096662	abcc3	0.55	0.219	22.754	X	.	.	X	.	.
abcc4	L	gene8577	5.865	5.621	.	.	.	D	NA	NA	NA	NA	NA	NA	NA	XBXT10g001905	2.227	2.862	X	X	.	.	ENSDARG00000058953	abcc4	23.363	11.258	2.315	X	.	.	.	.	.
abcc5	L	gene16194	5.727	4.089	.	.	.	U	NA	NA	NA	NA	NA	NA	NA	XBXT10g018185	21.299	17.939	X	X	.	.	ENSDARG00000061233	abcc5	1.321	4.369	3.457	X	.	.	X	.	.
abcc6	L	gene6963	8.556	13.619	.	.	.	.	NA	NA	NA	NA	NA	NA	NA	XBXT10g014668	22.398	25.776	X	X	.	.	NA	NA	NA	NA	NA	NA	NA	NA	NA	NA	NA
abcd1	LS	gene49796	10.253	11.76	.	.	.	.	gene39766	13.137	11.9	.	.	.	.	XBXT10g015373	16.969	14.097	X	X	.	.	NA	NA	NA	NA	NA	NA	NA	NA	NA	NA	NA
abcd2	LS	gene20462	0.145	0.371	.	.	.	.	gene13822	0	0.074	.	.	.	.	XBXT10g002887	0.237	2.097	X	X	.	D	NA	NA	NA	NA	NA	NA	NA	NA	NA	NA	NA
abcd3	S	NA	NA	NA	NA	NA	NA	NA	gene4614	46.384	44.098	.	.	.	.	XBXT10g013058	86.267	98.351	X	X	.	.	ENSDARG00000002947, ENSDARG00000104085	abcd3b, abcd3a	106.929	62.694	13.093	X	.	.	.	.	.
abcd4	L	gene42581	2.876	2.414	.	.	.	.	NA	NA	NA	NA	NA	NA	NA	XBXT10g008485	23.627	22.416	X	X	.	.	ENSDARG00000061770	abcd4	20.66	11.131	1.89	X	.	.	.	.	.
abce1	LS	gene1725	186.7	191.641	X	.	.	.	gene19372	117.633	105.808	.	.	.	.	XBXT10g010118	242.053	226.121	X	X	.	.	ENSDARG00000007216	abce1	140.132	127.107	187.166	X	.	X	X	.	.
abcf1	L	gene10093	78.437	63.994	.	.	.	.	NA	NA	NA	NA	NA	NA	NA	XBXT10g015832	53.409	49.631	X	X	.	.	ENSDARG00000031795	abcf1	54.146	33.819	67.846	X	.	.	X	.	.
abcf3	LS	gene5949	25.463	18.623	X	.	.	.	gene6363	71.317	75.312	X	.	.	.	XBXT10g006115	107.73	113.105	X	X	.	.	NA	NA	NA	NA	NA	NA	NA	NA	NA	NA	NA
abcg1	LS	gene13328	0.039	0.054	.	.	.	.	gene7749	0.006	0.045	.	.	.	.	XBXT10g005293	0.026	0	.	.	NA	NA	ENSDARG00000063475	abcg1	1.413	1.46	0.945	X	.	.	.	.	.
abcg2	LS	gene11768	7.173	4.403	.	.	D	.	gene20321	0.09	1.231	X	.	D	.	XBXT10g017485	87.825	47.198	X	X	.	.	NA	NA	NA	NA	NA	NA	NA	NA	NA	NA	NA
abcg4	LS	gene14844	0	0.03	.	.	.	.	gene23572	0	0.072	.	.	.	.	XBXT10g018983	0.031	1.656	.	X	NA	NA	ENSDARG00000061047, ENSDARG00000078068	abcg4a, abcg4b	0.658	0.831	0.265	.	.	.	.	.	.
abcg5	S	NA	NA	NA	NA	NA	NA	NA	gene19139	0	0	.	.	.	.	XBXT10g008945	0.101	0.094	X	.	.	.	ENSDARG00000063078	abcg5	0.242	0	0.144	.	.	.	.	.	.
abcg8	S	NA	NA	NA	NA	NA	NA	NA	gene19873	0.015	0	.	.	.	.	XBXT10g012585	0.026	0	X	.	.	.	ENSDARG00000063059	abcg8	0	0.057	0.118	.	.	.	.	.	.
abhd10	L	gene886	15.169	17.855	.	.	.	.	NA	NA	NA	NA	NA	NA	NA	XBXT10g010519	18.501	12.755	X	X	.	.	ENSDARG00000076435	abhd10a	31.365	15.529	1.963	X	.	.	.	.	.
abhd11	L	gene8438	25.655	19.504	.	.	.	.	NA	NA	NA	NA	NA	NA	NA	XBXT10g015947	31.9	30.036	X	X	.	.	ENSDARG00000069501	abhd11	7.312	4.169	2.717	X	.	.	.	.	.
abhd12	LS	gene34422	52.352	54.68	.	.	.	.	gene14546	0.678	4.215	.	.	.	.	XBXT10g018066	13.366	15.355	X	X	.	.	ENSDARG00000071004	abhd12	9.848	11.061	15.634	X	.	.	X	.	.
abhd13	LS	gene12464	86.449	87.742	X	.	D	.	gene16981	25.498	36.174	.	.	.	.	XBXT10g007207	58.509	52.136	X	X	.	.	ENSDARG00000059209	abhd13	48.346	55.642	6.716	X	.	.	.	.	.
abhd14a	LS	gene11225	2.325	1.077	.	.	.	.	gene7007	3.88	2.439	.	.	.	.	XBXT10g019805	13.183	14.999	X	X	.	.	ENSDARG00000058367	abhd14a	46.628	40.628	31.384	X	.	.	.	.	.
abhd14b	L	gene6601	18.377	13.129	.	.	.	.	NA	NA	NA	NA	NA	NA	NA	XBXT10g017515	1.876	1.352	X	X	.	.	ENSDARG00000100531	abhd14b	3.14	9.547	13.379	X	.	.	X	.	.
abhd16a	LS	gene285	42.722	36.945	.	.	.	.	gene13187	16.447	12.897	.	.	.	.	XBXT10g009867	25.709	24.972	X	X	.	.	ENSDARG00000078929	abhd16a	72.701	73.32	7.695	X	.	.	.	.	.
abhd17a	LS	gene6697	22.367	25.419	.	.	.	.	gene34529	109.323	108.086	.	.	.	.	XBXT10g011300	74.461	89.55	X	X	X	U	NA	NA	NA	NA	NA	NA	NA	NA	NA	NA	NA
abhd17b	LS	gene11563	111.71	132.958	.	.	.	.	gene11236	77.932	78.367	.	.	.	.	XBXT10g011394	204.814	220.927	X	X	X	.	ENSDARG00000035571	abhd17b	56.958	24.67	2.741	X	.	.	.	.	.
abhd17c	LS	gene8541	70.995	59.348	X	X	U	.	gene1713	56.437	41.721	X	X	U	.	XBXT10g007305	85.879	100.312	X	X	X	.	ENSDARG00000058452	abhd17c	111.305	112.574	30.952	X	.	.	X	.	.
abhd18	L	gene14886	62.076	51.136	.	.	.	.	NA	NA	NA	NA	NA	NA	NA	XBXT10g007608	46.462	24.663	X	X	.	.	ENSDARG00000101961	abhd18	60.6	89.697	8.302	X	.	.	.	.	.
abhd2	LS	gene50784	64.788	91.021	.	.	.	.	gene41844	5.178	6.594	.	.	.	.	XBXT10g007746	13.294	13.894	X	X	.	.	ENSDARG00000025797, ENSDARG00000045804	abhd2a, abhd2b	71.696	39.788	9.907	X	.	.	.	.	.
abhd3	LS	gene36023	0.237	0.11	.	.	.	.	gene4508	17.376	5.44	X	X	U	D	XBXT10g016352	4.629	1.969	X	X	.	.	ENSDARG00000018809	abhd3	0	0.224	0.043	.	.	.	.	.	.
abhd4	LS	gene12103	1.469	2.146	.	.	.	D	gene16378	4.222	3.334	.	.	.	.	XBXT10g012445	26.108	39.029	X	X	X	D	ENSDARG00000102887	abhd4	25.09	40.932	5.737	X	.	.	.	.	.
abhd5	LS	gene20104	16.472	7.46	.	.	.	.	gene13584	2.359	1.591	.	.	.	.	XBXT10g014084	36.635	14.565	X	X	.	.	NA	NA	NA	NA	NA	NA	NA	NA	NA	NA	NA
abhd6	LS	gene4371	0.324	0.165	.	.	.	.	gene48675	3.421	5.312	.	.	.	.	XBXT10g017253	1.873	1.134	X	X	.	.	NA	NA	NA	NA	NA	NA	NA	NA	NA	NA	NA
abhd8	LS	gene2088	0.289	0.113	.	.	.	.	gene6655	0	0.036	.	.	.	.	XBXT10g018445	0.962	0.479	X	.	.	.	ENSDARG00000076620, ENSDARG00000103518	abhd8b, abhd8a	0	2.682	0.444	X	.	.	.	.	.
abi1	S	NA	NA	NA	NA	NA	NA	NA	gene40868	13.559	8.747	.	.	.	.	XBXT10g013349	17.452	18.65	X	X	.	.	ENSDARG00000010155, ENSDARG00000062991	abi1a, abi1b	13.529	9.487	13.634	X	.	.	X	.	.
abi2	LS	gene5840	22.856	18.274	.	.	.	.	gene39808	27.134	17.375	.	.	.	.	XBXT10g017019	14.618	17.805	X	X	X	U	NA	NA	NA	NA	NA	NA	NA	NA	NA	NA	NA
abi3	L	gene15660	0	0.04	.	.	.	.	NA	NA	NA	NA	NA	NA	NA	XBXT10g004440	0	0	X	.	.	.	NA	NA	NA	NA	NA	NA	NA	NA	NA	NA	NA
abitram	S	NA	NA	NA	NA	NA	NA	NA	gene11993	24.945	38.719	X	.	U	.	XBXT10g002547	118.55	132.443	X	X	X	U	ENSDARG00000070407	abitram	19.873	26.909	28.062	X	.	.	.	.	.
abl1	LS	gene7090	25.222	33.18	.	.	.	.	gene50642	1.028	0.602	.	.	.	.	XBXT10g002530	8.547	9.977	X	X	.	.	NA	NA	NA	NA	NA	NA	NA	NA	NA	NA	NA
abl2	LS	gene39279	91.831	93.666	.	.	.	.	gene38405	64.105	63.339	X	.	D	.	XBXT10g013308	87.977	99.294	X	X	X	U	ENSDARG00000013841	abl2	31.296	31.401	10.691	X	.	.	X	.	.
ablim1	S	NA	NA	NA	NA	NA	NA	NA	gene47049	9.723	9.077	.	.	.	.	XBXT10g005668	9.683	8.196	X	X	.	.	ENSDARG00000060149, ENSDARG00000045064	ablim1a, ablim1b	0.648	0.281	3.38	X	.	.	X	.	.
ablim2	L	gene36576	0.056	0.078	.	.	.	.	NA	NA	NA	NA	NA	NA	NA	XBXT10g005863	0	0	X	.	.	.	NA	NA	NA	NA	NA	NA	NA	NA	NA	NA	NA
ablim3	LS	gene50064	0.078	0.025	.	.	.	.	gene45196	0.161	1.444	.	.	.	U	XBXT10g018267	0.132	0.107	X	.	.	.	ENSDARG00000088168	ablim3	0.15	0.129	0.179	.	.	.	.	.	.
abo.1	L	gene15559	0.558	0.226	.	.	.	.	NA	NA	NA	NA	NA	NA	NA	XBXT10g019969	9.693	4.792	X	X	.	.	ENSDARG00000019207	abo	0	0	0	.	.	.	.	.	.
abo.2	L	gene7693	3.881	3.234	.	.	.	.	NA	NA	NA	NA	NA	NA	NA	XBXT10g012136	77.111	84.662	X	X	.	.	ENSDARG00000019207	abo	0	0	0	.	.	.	.	.	.
abo.3	L	gene43704	6.058	12.794	.	.	.	.	NA	NA	NA	NA	NA	NA	NA	XBXT10g011566	0.064	0.624	X	.	X	D	ENSDARG00000019207	abo	0	0	0	.	.	.	.	.	.
abo.4	L	gene45218	3.113	0.446	.	.	.	.	NA	NA	NA	NA	NA	NA	NA	XBXT10g008058	59.185	67.614	X	X	X	D	ENSDARG00000019207	abo	0	0	0	.	.	.	.	.	.
abo2	LS	gene49873	0	0.065	.	.	.	.	gene9471	0	0.143	.	.	.	.	XBXT10g017773	0	0.228	.	.	NA	NA	NA	NA	NA	NA	NA	NA	NA	NA	NA	NA	NA
abr	LS	gene1453	30.622	22.148	.	.	.	.	gene11558	59.648	41.823	.	.	.	.	XBXT10g019178	32.116	28.98	X	X	.	.	ENSDARG00000095180	abr	42.982	34.307	6.206	X	.	.	.	.	.
abra	LS	gene655	0	0	.	.	.	.	gene40298	0.081	0	.	.	.	.	XBXT10g010170	0.116	0.363	X	.	.	.	ENSDARG00000033854, ENSDARG00000038583	abrab, abraa	0	0.036	0.061	.	.	.	.	.	.
abracl	L	gene15331	46.799	26.575	.	.	.	.	NA	NA	NA	NA	NA	NA	NA	XBXT10g006543	149.4	63.474	X	X	X	.	ENSDARG00000042876	abracl	148.681	128.127	103.133	X	.	.	.	.	.
abraxas1	S	NA	NA	NA	NA	NA	NA	NA	gene17131	53.237	53.383	.	.	.	.	XBXT10g009515	101.385	107.225	X	X	.	.	ENSDARG00000043339	abraxas1	117.156	83.645	34.508	X	.	.	.	.	.
abraxas2	LS	gene13414	21.391	11.395	.	.	.	U	gene39158	15.464	14.633	.	.	.	.	XBXT10g008608	67.02	64.18	X	X	.	.	ENSDARG00000043339, ENSDARG00000098907	abraxas1, abraxas2	215.107	202.474	49.235	X	.	.	.	.	.
abt1	L	gene19179	73.701	56.67	.	.	.	.	NA	NA	NA	NA	NA	NA	NA	XBXT10g007217	20.226	9.601	.	X	NA	NA	ENSDARG00000043666	abt1	77.126	75.816	63.129	X	.	.	.	.	.
abtb1	LS	gene49555	13.83	12.774	.	.	.	.	gene14242	2.076	6.12	X	X	U	.	XBXT10g000245	13.911	13.366	X	X	X	U	NA	NA	NA	NA	NA	NA	NA	NA	NA	NA	NA
abtb2	LS	gene44442	0.105	0.086	.	.	.	.	gene18798	0.073	0.166	.	.	.	.	XBXT10g017612	0.084	0.44	X	.	.	.	ENSDARG00000062000	abtb2b	0	0.341	17.979	X	.	X	X	.	.
acaa1	L	gene4285	18.92	16.993	.	.	.	.	NA	NA	NA	NA	NA	NA	NA	XBXT10g015557	40.038	29.296	X	X	.	.	ENSDARG00000004687	acaa1	30.589	26.639	14.19	X	.	.	.	.	.
acaa2	LS	gene20396	109.693	103.435	X	.	.	.	gene49629	19.007	24.943	X	.	D	.	XBXT10g001543	32.57	31.359	X	X	.	.	ENSDARG00000038881	acaa2	88.542	82.905	52.081	X	.	.	.	.	.
acaca	LS	gene37147	5.307	6.098	.	.	.	.	gene9096	14.688	14.037	.	.	.	.	XBXT10g018728	20.259	26.167	X	X	.	.	ENSDARG00000078512	acaca	27.829	19.652	11.407	X	.	.	X	.	.
acad10	L	gene47694	24.191	19.728	.	.	.	.	NA	NA	NA	NA	NA	NA	NA	XBXT10g012923	10.645	13.135	X	X	.	.	NA	NA	NA	NA	NA	NA	NA	NA	NA	NA	NA
acad11	L	gene5340	4.804	3.745	.	.	.	.	NA	NA	NA	NA	NA	NA	NA	XBXT10g019868	9.968	11.334	X	X	.	.	ENSDARG00000045411	acad11	13.11	15.364	4.655	X	.	.	.	.	.
acad8	L	gene3537	30.408	25.347	.	.	.	.	NA	NA	NA	NA	NA	NA	NA	XBXT10g018716	4.817	4.203	X	X	.	.	ENSDARG00000042658	acad8	44.682	34.511	4.488	X	.	.	.	.	.
acad9	S	NA	NA	NA	NA	NA	NA	NA	gene48840	51.037	48.032	.	.	.	.	XBXT10g015060	46.917	37.674	X	X	.	.	ENSDARG00000055620	acad9	40.964	30.245	4.69	X	.	.	.	.	.
acadl	L	gene17402	116.914	127.055	.	.	.	.	NA	NA	NA	NA	NA	NA	NA	XBXT10g012506	80.497	71.116	X	X	.	.	ENSDARG00000088357	acadl	169.734	118.577	3.046	X	.	.	.	.	.
acadm	LS	gene8983	101.381	100.584	.	.	.	.	gene5405	59.676	43.758	.	.	.	.	XBXT10g000885	109.011	120.344	X	X	.	.	ENSDARG00000038900	acadm	660.428	590.788	132.716	X	.	.	.	.	.
acads	L	gene8153	46.829	32.432	.	.	.	.	NA	NA	NA	NA	NA	NA	NA	XBXT10g006491	34.061	47.644	X	X	X	U	ENSDARG00000030781	acads	57.973	31.886	17.897	X	.	.	.	.	.
acadsb	L	gene9867	47.812	46.283	.	.	.	.	NA	NA	NA	NA	NA	NA	NA	XBXT10g014914	52.038	49.853	X	X	.	.	ENSDARG00000076780	acadsb	10.908	16.133	6.016	X	.	.	.	.	.
acadvl	L	gene16476	51.304	40.821	.	.	.	.	NA	NA	NA	NA	NA	NA	NA	XBXT10g014665	94.443	75.142	X	X	.	.	ENSDARG00000016687	acadvl	92.692	91.77	46.123	X	.	.	X	.	.
acan	L	gene34694	0	0.019	.	.	.	.	NA	NA	NA	NA	NA	NA	NA	XBXT10g012967	0.028	0.038	X	.	.	.	ENSDARG00000045799, ENSDARG00000035891	acanb, acana	0	0.067	0.057	.	.	.	.	.	.
acap1	S	NA	NA	NA	NA	NA	NA	NA	gene40366	4.261	2.063	.	.	.	.	XBXT10g009012	0.204	0.029	X	.	.	.	ENSDARG00000056346	acap1	5.649	11.084	36.257	X	.	X	X	.	.
acap2	LS	gene41514	37.852	51.424	.	.	.	.	gene11229	8.779	6.289	.	.	.	.	XBXT10g012171	30.368	33.917	X	X	.	.	NA	NA	NA	NA	NA	NA	NA	NA	NA	NA	NA
acap3	LS	gene37492	11.741	11.112	.	.	.	.	gene39242	17.969	17.274	.	.	.	.	XBXT10g012972	21.95	12.966	X	X	.	.	ENSDARG00000099240, ENSDARG00000075990	acap3b, acap3a	113.939	110.631	10.624	X	.	.	.	.	.
acat1	LS	gene9051	207.717	177.984	.	.	.	U	gene10303	108.137	14.042	.	.	.	.	XBXT10g017111	18.013	8.186	X	X	.	.	ENSDARG00000045888	acat1	68.113	61.252	4.297	X	.	.	.	.	.
acat2	LS	gene10680	84.928	68.646	.	.	.	.	gene15034	35.383	38.009	.	.	.	.	XBXT10g006931	33.968	31.516	X	X	.	.	ENSDARG00000007127	acat2	55.713	65.457	16.654	X	.	.	.	.	.
acbd3	LS	gene15895	34.642	52.646	X	X	U	.	gene11078	32.853	36.134	X	X	U	.	XBXT10g001287	40.615	31.983	X	X	X	U	ENSDARG00000042623	acbd3	155.657	120.38	43.033	X	.	X	X	.	.
acbd4	L	gene2807	7.249	3.903	.	.	.	.	NA	NA	NA	NA	NA	NA	NA	XBXT10g015381	10.029	4.174	X	X	.	.	ENSDARG00000027070	acbd4	0	0	0	.	.	.	.	.	.
acbd5	L	gene2011	26.639	28.833	.	.	.	.	NA	NA	NA	NA	NA	NA	NA	XBXT10g009416	67.13	76.232	X	X	.	.	NA	NA	NA	NA	NA	NA	NA	NA	NA	NA	NA
acbd6	LS	gene4431	0.908	0.477	.	.	.	.	gene11345	59.05	66.216	.	.	.	.	XBXT10g015901	105.419	128.116	X	X	.	.	ENSDARG00000039456	acbd6	7.197	5.291	4.166	X	.	.	.	.	.
acbd7	L	gene15636	0	0	.	.	.	.	NA	NA	NA	NA	NA	NA	NA	XBXT10g006789	0.149	0	X	.	.	.	ENSDARG00000094730	acbd7	0	0.162	1.011	X	.	.	.	.	.
accs	LS	gene10981	4.885	4.39	.	.	.	.	gene49833	9.085	10.053	.	.	.	.	XBXT10g016768	0	0	X	.	.	.	ENSDARG00000052124	accs	159.398	104.476	5.615	X	.	.	.	.	.
ace2	LS	gene3856	0	0	.	.	.	.	gene606	0.018	0.027	.	.	.	.	XBXT10g008215	0	0.092	X	.	.	.	ENSDARG00000016918	ace2	1.668	2.021	0.744	X	.	.	.	.	.
acer1	L	gene9936	0.077	0.057	.	.	.	.	NA	NA	NA	NA	NA	NA	NA	XBXT10g000600	0.44	4.765	X	X	X	D	ENSDARG00000010347	acer1	23.202	13.336	419.495	X	.	.	X	.	.
acer2	LS	gene35665	14.505	9.371	X	X	.	D	gene20000	8.122	8.034	.	.	.	.	XBXT10g004175	8.331	10.139	X	X	X	U	NA	NA	NA	NA	NA	NA	NA	NA	NA	NA	NA
acer3	LS	gene18246	31.42	32.374	X	X	U	D	gene10010	22.779	21.629	X	.	U	D	XBXT10g000988	9.405	5.801	X	X	X	U	ENSDARG00000093366	acer3	0	0	14.327	X	.	.	X	.	.
ache	LS	gene18457	1.016	0.796	.	.	.	.	gene15281	8.315	9.229	.	.	.	.	XBXT10g003184	1.133	0.884	X	X	.	.	ENSDARG00000031796	ache	0	0.498	1.188	X	.	.	.	.	.
acin1	LS	gene2362	61.316	54.408	X	X	U	D	gene19443	48.069	51.209	X	X	U	D	XBXT10g018834	42.855	50.508	X	X	X	.	ENSDARG00000026842, ENSDARG00000054290	acin1b, acin1a	274.672	295.528	274.119	X	X	X	X	X	X
ackr3	LS	gene12973	0	9.719	X	X	U	D	gene13736	0	4.302	X	X	U	D	XBXT10g014570	0	6.746	X	X	X	D	ENSDARG00000062478, ENSDARG00000058179	ackr3a, ackr3b	0	72.354	48.845	X	X	X	X	X	X
ackr4	L	gene4039	0.023	0	.	.	.	.	NA	NA	NA	NA	NA	NA	NA	XBXT10g013106	0.052	0.146	X	.	.	.	ENSDARG00000078729, ENSDARG00000040133	ackr4a, ackr4b	0	0.297	0.716	.	.	.	.	.	.
acly	LS	gene4592	60.218	63.218	.	.	.	.	gene13375	24.372	28.399	.	.	.	.	XBXT10g015357	77.133	74.769	X	X	.	.	ENSDARG00000099079, ENSDARG00000055652	aclya, aclyb	109.933	65.037	25.83	X	.	X	X	.	.
acmsd	LS	gene7432	0	0.046	.	.	.	.	gene16897	0.034	0.82	X	X	D	.	XBXT10g018539	0.043	1.692	X	X	.	.	ENSDARG00000062549	acmsd	0	0	0.227	.	.	.	.	.	.
aco1	L	gene13109	25.472	25.444	.	.	.	.	NA	NA	NA	NA	NA	NA	NA	XBXT10g009143	52.446	66.202	X	X	.	.	ENSDARG00000026376	aco1	45.046	31.304	21.475	X	.	.	.	.	.
aco2	LS	gene9191	178.392	176.292	.	.	.	.	gene5999	78.817	98.946	.	.	.	.	XBXT10g006750	406.047	402.269	X	X	.	.	ENSDARG00000007294	aco2	210.694	223.641	136.065	X	.	.	X	.	.
acod1	LS	gene15951	0	0.653	.	.	.	.	gene44685	0.027	9.895	.	.	.	D	XBXT10g011871	2.295	4.193	X	X	.	.	ENSDARG00000069844	acod1	0	0.339	0	.	.	.	.	.	.
acod1la	L	gene46104	0	0	.	.	.	.	NA	NA	NA	NA	NA	NA	NA	XBXT10g008264	0	0	.	.	NA	NA	NA	NA	NA	NA	NA	NA	NA	NA	NA	NA	NA
acod1lb	L	gene46483	0	0.087	.	.	.	.	NA	NA	NA	NA	NA	NA	NA	XBXT10g006512	0	0.097	X	.	.	.	NA	NA	NA	NA	NA	NA	NA	NA	NA	NA	NA
acot12	L	gene9730	79.493	98.443	.	.	.	.	NA	NA	NA	NA	NA	NA	NA	XBXT10g017839	81.63	73.899	X	X	.	.	NA	NA	NA	NA	NA	NA	NA	NA	NA	NA	NA
acot13	S	NA	NA	NA	NA	NA	NA	NA	gene16725	36.415	20.06	.	.	.	.	XBXT10g009398	41.422	27.659	X	X	.	.	ENSDARG00000061728	acot13	3.049	2.897	2.417	X	.	.	.	.	.
acot2	LS	gene37200	0.144	0.058	.	.	.	.	gene1773	8.698	17.079	.	.	.	U	XBXT10g013037	65.018	19.842	X	X	.	.	NA	NA	NA	NA	NA	NA	NA	NA	NA	NA	NA
acot7	L	gene17707	10.784	9.006	.	.	.	.	NA	NA	NA	NA	NA	NA	NA	XBXT10g019201	5.528	5.599	X	X	X	.	ENSDARG00000018653	acot7	2.832	2.26	4.378	X	.	.	.	.	.
acot8	S	NA	NA	NA	NA	NA	NA	NA	gene7950	1.886	1.058	.	.	.	.	XBXT10g007214	1.952	1.67	X	X	.	.	ENSDARG00000014138	acot8	8.798	5.244	0	X	.	.	.	.	.
acot9	S	NA	NA	NA	NA	NA	NA	NA	gene41668	44.148	58.177	X	.	D	.	XBXT10g001564	76.482	69.675	X	X	.	.	ENSDARG00000058352	acot9.1	69.432	69.145	7.324	X	.	.	.	.	.
acox1	LS	gene19413	17.546	20.509	.	.	.	.	gene46769	15.568	28.72	.	.	.	.	XBXT10g013235	1.755	1.657	X	X	.	.	ENSDARG00000014727	acox1	29.005	8.385	5.586	X	.	.	.	.	.
acox2	L	gene43504	26.962	27.325	.	.	.	.	NA	NA	NA	NA	NA	NA	NA	XBXT10g007204	34.205	34.831	X	X	.	.	NA	NA	NA	NA	NA	NA	NA	NA	NA	NA	NA
acox3	L	gene20256	12.39	20.031	.	.	.	.	NA	NA	NA	NA	NA	NA	NA	XBXT10g010209	22.581	24.588	X	X	.	.	ENSDARG00000038865	acox3	29.846	21.864	3.721	X	.	.	.	.	.
acp1	LS	gene13841	62.93	59.378	.	.	.	.	gene3974	96.576	87.453	.	.	.	.	XBXT10g002336	222.973	224.312	X	X	.	.	ENSDARG00000076486	acp1	58.677	61.498	34.1	X	.	.	X	.	.
acp2	S	NA	NA	NA	NA	NA	NA	NA	gene20047	46.888	53.742	.	.	.	.	XBXT10g013016	41.212	55.77	X	X	.	.	ENSDARG00000007244	acp2	39.12	50.252	8.244	X	.	.	.	.	.
acp3	L	gene39341	0	0	.	.	.	.	NA	NA	NA	NA	NA	NA	NA	XBXT10g008435	0	0.293	.	.	NA	NA	NA	NA	NA	NA	NA	NA	NA	NA	NA	NA	NA
acp4	S	NA	NA	NA	NA	NA	NA	NA	gene46157	4.984	6.919	.	.	.	.	XBXT10g010789	0.053	2.297	X	X	.	.	NA	NA	NA	NA	NA	NA	NA	NA	NA	NA	NA
acp5	LS	gene8112	1.504	0.56	.	.	.	.	gene2470	67.74	74.925	.	.	.	.	XBXT10g016919	49.575	36.795	X	X	X	U	ENSDARG00000019763, ENSDARG00000101456	acp5a, acp5b	2066.73	2090.39	268.332	X	.	.	.	.	.
acp6	S	NA	NA	NA	NA	NA	NA	NA	gene17751	30.776	25.386	.	.	.	.	XBXT10g001850	0.153	0.085	X	.	.	.	ENSDARG00000040064	acp6	13.191	11.667	3.419	X	.	.	.	.	.
acp7	L	gene6368	0.202	0.246	.	.	.	.	NA	NA	NA	NA	NA	NA	NA	XBXT10g019257	0.335	1.102	X	X	.	.	ENSDARG00000102421	acp7	9.458	10.38	1.406	X	.	.	.	.	.
acr.2	L	gene45847	0	0	.	.	.	.	NA	NA	NA	NA	NA	NA	NA	XBXT10g015439	0	0	.	.	NA	NA	NA	NA	NA	NA	NA	NA	NA	NA	NA	NA	NA
acsbg1	L	gene14124	0.01	0.054	.	.	.	.	NA	NA	NA	NA	NA	NA	NA	XBXT10g000232	0.231	0.268	X	.	.	.	NA	NA	NA	NA	NA	NA	NA	NA	NA	NA	NA
acsbg2	LS	gene48757	165.648	170.341	.	.	.	.	gene43179	0.816	1.357	.	.	.	.	XBXT10g008821	283.934	287.164	X	X	.	.	ENSDARG00000004094	acsbg2	62.064	25.652	108.588	X	.	X	X	.	.
acsf2	LS	gene1900	0.829	0.983	X	X	U	D	gene15358	0	0.473	.	.	.	.	XBXT10g016212	7.397	8.001	X	X	X	U	ENSDARG00000061201	acsf2	57.753	43.651	21.28	X	.	.	.	.	.
acsf3	LS	gene1061	1.362	0.542	.	.	.	.	gene14064	6.556	9.524	.	.	.	.	XBXT10g001625	8.949	7.668	X	X	.	.	NA	NA	NA	NA	NA	NA	NA	NA	NA	NA	NA
acsl1	LS	gene17415	103.575	107.817	X	X	U	.	gene2183	82.227	83.616	X	X	.	D	XBXT10g018805	144.13	153.294	X	X	.	.	ENSDARG00000003854, ENSDARG00000030514	acsl1b, acsl1a	9.938	11.24	10.666	X	.	.	X	.	.
acsl3	LS	gene70	77.701	57.358	X	X	D	D	gene18410	101.645	91.863	X	X	.	D	XBXT10g002579	54.847	59.393	X	X	.	.	ENSDARG00000014674, ENSDARG00000032079	acsl3b, acsl3a	33.228	25.312	23.267	X	.	.	X	.	.
acsl4	LS	gene17661	80.046	64.714	X	X	U	D	gene18528	39.951	37.779	X	X	.	D	XBXT10g019334	117.33	125.137	X	X	X	U	ENSDARG00000010752, ENSDARG00000004078	acsl4b, acsl4a	153.047	132.312	39.721	X	.	.	X	.	.
acsl5	L	gene3954	0.389	0.028	.	.	.	.	NA	NA	NA	NA	NA	NA	NA	XBXT10g007695	1.116	0.574	.	X	NA	NA	ENSDARG00000075931	acsl5	17.204	15.658	3.378	X	.	.	.	.	.
acsl6	L	gene6550	33.095	10.393	.	.	.	.	NA	NA	NA	NA	NA	NA	NA	XBXT10g002748	0.349	0.213	X	.	.	.	NA	NA	NA	NA	NA	NA	NA	NA	NA	NA	NA
acsm3	L	gene5935	0.089	0.083	.	.	.	.	NA	NA	NA	NA	NA	NA	NA	XBXT10g007049	1.894	2.828	X	X	.	.	ENSDARG00000004880	acsm3	0.632	3.827	4.602	X	.	.	X	.	.
acss1	LS	gene17631	0.37	0.328	.	.	.	D	gene36084	0	0	.	.	.	.	XBXT10g010376	0	0.018	X	.	.	.	ENSDARG00000044142	acss1	32.215	44.305	29.552	X	.	.	X	.	.
acss2.1	L	gene45664	58.877	49.034	.	.	.	.	NA	NA	NA	NA	NA	NA	NA	XBXT10g009115	25.991	25.755	X	X	.	.	ENSDARG00000037781	acss2	48.471	54.504	32.604	X	.	.	X	.	.
acss2.2	L	gene16263	1.243	0.56	.	.	.	.	NA	NA	NA	NA	NA	NA	NA	XBXT10g010800	0.964	0.391	X	.	.	.	ENSDARG00000037781	acss2	48.471	54.504	32.604	X	.	.	X	.	.
acss3	L	gene5750	18.85	14.635	.	.	.	.	NA	NA	NA	NA	NA	NA	NA	XBXT10g011073	43.685	54.516	X	X	.	.	ENSDARG00000032218	acss3	8.6	12.031	5.776	X	.	.	.	.	.
acta1	LS	gene15810	0	0	.	.	.	.	gene9813	0	0.1	.	.	.	.	XBXT10g000944	0.257	0	X	.	.	.	ENSDARG00000099197	actc1b	0.338	1.155	0.803	X	.	.	.	.	.
acta2	LS	gene2116	4.383	7.257	.	.	.	.	gene12862	0.041	0	.	.	.	.	XBXT10g012471	0.062	0.517	X	.	.	.	ENSDARG00000045180	acta2	0	0.122	0.382	.	.	.	.	.	.
acta4	LS	gene956	0.177	0.065	.	.	.	.	gene19900	0.217	0	.	.	.	.	XBXT10g001052	0	0	X	.	.	.	NA	NA	NA	NA	NA	NA	NA	NA	NA	NA	NA
actb	LS	gene15781	533.531	460.626	X	X	U	D	gene8320	455.309	512.984	X	X	U	D	XBXT10g009357	1500.37	1266.57	X	X	X	.	ENSDARG00000037870, ENSDARG00000037746	actb2, actb1	3154.09	2681.91	3345.71	X	.	X	X	.	X
actc1	LS	gene19063	0	0.11	.	.	.	.	gene15500	0	0.053	.	.	.	.	XBXT10g013793	0	0.234	X	.	.	.	ENSDARG00000055618	acta1b	3.816	2.175	0.454	X	.	.	.	.	.
actg1	LS	gene50982	324.815	393.618	.	.	.	.	gene5277	274.466	357.437	X	X	U	.	XBXT10g016623	1106.3	1098.75	X	X	.	.	NA	NA	NA	NA	NA	NA	NA	NA	NA	NA	NA
actl6a	S	NA	NA	NA	NA	NA	NA	NA	gene5951	97.786	93.478	.	.	.	.	XBXT10g004902	340.604	391.8	X	X	.	.	ENSDARG00000070828	actl6a	164.984	282.431	310.768	X	.	X	X	.	.
actn1	LS	gene7284	2.028	1.808	.	.	.	U	gene13179	57.534	50.861	.	.	.	.	XBXT10g010669	86.917	104.398	X	X	X	.	ENSDARG00000007219	actn1	6.361	6.831	1.759	X	.	.	.	.	.
actn2	LS	gene16734	0.018	0	.	.	.	.	gene20045	0.05	0.025	.	.	.	.	XBXT10g015578	0.566	0.535	X	.	.	.	ENSDARG00000071090	actn2b	3.007	2.515	1.55	X	.	.	.	.	.
actn3	L	gene1680	0	0.038	.	.	.	.	NA	NA	NA	NA	NA	NA	NA	XBXT10g010290	0	0	X	.	.	.	ENSDARG00000013755, ENSDARG00000001431	actn3a, actn3b	3.299	4.447	3.163	X	.	X	X	.	.
actn4	LS	gene14393	66.382	66.158	X	X	U	D	gene11677	38.426	39.43	X	X	U	D	XBXT10g017482	86.122	97.599	X	X	.	.	ENSDARG00000099786	actn4	132.912	95.582	102.714	X	.	X	X	.	.
actr10	LS	gene19384	28.746	5.658	.	.	.	D	gene5371	19.186	16.953	.	.	.	.	XBXT10g003817	67.515	80.396	X	X	.	.	ENSDARG00000038432	actr10	67.251	65.986	27.96	X	.	.	.	.	.
actr1a	LS	gene13453	11.082	12.28	.	.	.	.	gene18483	21.387	23.217	.	.	.	.	XBXT10g017324	56.101	58.884	X	X	.	.	NA	NA	NA	NA	NA	NA	NA	NA	NA	NA	NA
actr2	LS	gene17277	81.562	79.85	.	.	.	.	gene7742	38.628	35.878	.	.	.	.	XBXT10g014576	189.463	227.69	X	X	X	.	ENSDARG00000070076, ENSDARG00000052438	actr2b, actr2a	124.826	124.023	124.226	X	.	X	X	.	.
actr3	LS	gene15606	50.194	36.406	.	.	.	.	gene10245	120.965	93.123	.	.	.	.	XBXT10g002226	116.262	111.236	X	X	.	.	ENSDARG00000091138	actr3	66.227	74.2	66.606	X	.	.	.	.	.
actr5	S	NA	NA	NA	NA	NA	NA	NA	gene241	18.371	9.664	.	.	.	.	XBXT10g012709	15.284	9.21	X	X	.	.	ENSDARG00000098235	actr5	90.973	93.632	25.17	X	.	.	.	.	.
actr6	L	gene16852	9.636	8.48	X	.	U	.	NA	NA	NA	NA	NA	NA	NA	XBXT10g004079	199.438	127.323	X	X	X	U	ENSDARG00000021370	actr6	39.866	61.07	45.55	X	.	.	.	.	.
actr8	S	NA	NA	NA	NA	NA	NA	NA	gene8847	53.774	42.997	X	.	U	.	XBXT10g007213	132.616	109.348	X	X	.	.	ENSDARG00000103610	actr8	91.862	79.382	19.974	X	.	.	.	.	.
acvr1	LS	gene35625	33.401	42.705	X	X	U	D	gene50291	99.778	96.876	X	X	D	D	XBXT10g014729	60.208	66.628	X	X	X	.	ENSDARG00000014986	acvr1l	156.214	253.577	331.025	X	X	X	X	.	.
acvr1b	LS	gene16229	60.837	35.668	X	X	.	D	gene6744	73.988	43.889	X	.	.	.	XBXT10g006986	81.219	47.669	X	X	X	.	ENSDARG00000052142, ENSDARG00000018968	acvr1bb, acvr1ba	253.544	258.179	262.074	X	.	X	X	.	.
acvr1c	LS	gene15076	0.086	0.023	.	.	.	.	gene36312	0.068	0	.	.	.	.	XBXT10g014476	4.215	4.315	X	X	.	.	NA	NA	NA	NA	NA	NA	NA	NA	NA	NA	NA
acvr2a	LS	gene15661	42.94	33.725	X	.	U	.	gene19850	26.645	21.288	X	X	U	.	XBXT10g009751	18.683	18.812	X	X	.	.	ENSDARG00000104700, ENSDARG00000011188	acvr2ab, acvr2aa	108.567	86.804	26.902	X	X	X	X	.	.
acvr2b	LS	gene46501	32.619	25.782	.	.	.	.	gene12691	113.66	90.325	X	X	U	D	XBXT10g008576	140.842	141.001	X	X	.	.	ENSDARG00000044422	acvr2ba	100.839	128.984	60.985	X	.	.	X	.	.
acvrl1	LS	gene7392	0	0	.	.	.	.	gene12670	0	0	.	.	.	.	XBXT10g017562	0.098	0.275	X	.	.	.	ENSDARG00000018179	acvrl1	0	0	0.375	.	.	.	.	.	.
acy1.1	S	NA	NA	NA	NA	NA	NA	NA	gene40107	3.956	1.524	.	.	.	D	XBXT10g005421	6.805	6.581	X	X	X	U	ENSDARG00000038475, ENSDARG00000111129	acy1, acy1	4.815	9.773	6.292	X	.	.	.	.	.
acy3	L	gene36826	0.405	1.545	X	.	D	.	NA	NA	NA	NA	NA	NA	NA	XBXT10g012174	0.12	0.391	X	.	X	D	ENSDARG00000093003, ENSDARG00000005525	acy3.1, acy3.2	14.815	10.058	34.146	X	.	.	X	.	.
acyp1	S	NA	NA	NA	NA	NA	NA	NA	gene17243	3.167	3.395	.	.	.	.	XBXT10g014138	9.109	2.289	X	X	.	.	ENSDARG00000060126	acyp1	5.724	4.46	0.227	X	.	.	.	.	.
ada	LS	gene46750	0.201	0.627	.	.	.	.	gene45363	9.688	6.98	.	.	.	.	XBXT10g004748	2.089	1.345	.	X	NA	NA	ENSDARG00000003113	ada	0	0	0.613	.	.	.	.	.	.
ada.2	S	NA	NA	NA	NA	NA	NA	NA	gene15553	0	0.034	.	.	.	.	XBXT10g017384	0	0	X	.	.	.	ENSDARG00000003113	ada	0	0	0.613	.	.	.	.	.	.
ada2	S	NA	NA	NA	NA	NA	NA	NA	gene5071	0.827	0.368	.	.	.	.	XBXT10g010970	0	0	X	.	.	.	ENSDARG00000051746, ENSDARG00000015623	ada2a, ada2b	15.666	10.726	4.012	X	.	.	.	.	.
adad1	L	gene3783	4.978	2.989	.	.	.	U	NA	NA	NA	NA	NA	NA	NA	XBXT10g010021	11.644	11.525	X	X	.	.	ENSDARG00000089181	adad1	38.216	22.922	1.792	X	.	.	.	.	.
adad2	S	NA	NA	NA	NA	NA	NA	NA	gene13963	7.827	4.802	.	.	.	.	XBXT10g006566	36.89	23.989	X	X	.	.	NA	NA	NA	NA	NA	NA	NA	NA	NA	NA	NA
adal	L	gene17783	1.78	1.048	.	.	.	.	NA	NA	NA	NA	NA	NA	NA	XBXT10g008668	6.183	5.028	X	X	.	.	ENSDARG00000012986	adal	7.184	2.731	2.136	X	.	.	.	.	.
adam10	S	NA	NA	NA	NA	NA	NA	NA	gene48516	221.195	242.564	X	X	U	D	XBXT10g001464	183.907	222.146	X	X	.	.	ENSDARG00000015502	adam10b	18.293	16.876	6.921	X	.	.	.	.	.
adam11	LS	gene41517	0.011	0.017	.	.	.	.	gene50496	0	0.02	.	.	.	.	XBXT10g006851	0.027	0	X	.	.	.	ENSDARG00000079204	adam11	0	0.245	0.102	.	.	.	.	.	.
adam12	LS	gene1266	0.344	0.145	.	.	.	.	gene15294	0.127	0.218	.	.	.	.	XBXT10g004912	0.157	0.256	X	.	.	.	ENSDARG00000079068	adam12	5.222	6.226	0.776	X	.	.	.	.	.
adam15	L	gene47820	10.793	16.889	.	.	.	.	NA	NA	NA	NA	NA	NA	NA	XBXT10g014664	13.714	9.949	X	X	.	.	ENSDARG00000089213	adam15	0.873	0.837	0.566	.	.	.	.	.	.
adam17	LS	gene2590	16.197	14.177	.	.	.	.	gene18141	15.134	15.04	.	.	.	.	XBXT10g014198	22.602	24.261	X	X	.	.	ENSDARG00000043213, ENSDARG00000093093	adam17a, adam17b	46.137	46.533	33.284	X	.	.	.	.	.
adam19	S	NA	NA	NA	NA	NA	NA	NA	gene12193	0	0.033	.	.	.	.	XBXT10g010046	0	0.033	X	.	.	.	ENSDARG00000059693, ENSDARG00000067545	adam19a, adam19b	0	0.433	0.409	.	.	.	.	.	.
adam22	L	gene7658	0.97	0.475	.	.	.	.	NA	NA	NA	NA	NA	NA	NA	XBXT10g013144	1.05	1.353	X	X	.	.	ENSDARG00000060532	adam22	1.05	0.748	0.312	X	.	.	.	.	.
adam28.1	LS	gene3375	1.63	1.275	.	.	U	.	gene44796	22.372	22.592	.	.	.	.	XBXT10g018166	0.914	1.004	X	X	.	.	ENSDARG00000035514	adam28	0	0.141	7.77	X	.	.	X	.	.
adam28.2	LS	gene37647	0	0	.	.	.	.	gene34727	0	0.146	.	.	.	.	XBXT10g003721	0.539	0.251	X	.	.	.	ENSDARG00000035514	adam28	0	0.141	7.77	X	.	.	X	.	.
adam28.3	S	NA	NA	NA	NA	NA	NA	NA	gene4855	0.019	0.054	.	.	.	.	XBXT10g019068	0	0	.	.	NA	NA	ENSDARG00000035514	adam28	0	0.141	7.77	X	.	.	X	.	.
adam33	LS	gene16272	1.083	8.228	X	X	D	D	gene11311	0.011	0.319	.	.	.	.	XBXT10g006717	5.74	8.558	X	X	.	.	NA	NA	NA	NA	NA	NA	NA	NA	NA	NA	NA
adam9	LS	gene35928	50.902	39.691	.	.	.	.	gene18898	21.81	18.918	.	.	.	.	XBXT10g011608	26.274	25.409	X	X	.	.	ENSDARG00000010070	adam9	28.501	23.258	3.817	X	.	.	.	.	.
adamts1	LS	gene5957	3.116	30.152	X	X	D	D	gene18002	21.534	40.615	X	X	D	D	XBXT10g018417	91.676	61.759	X	X	X	D	ENSDARG00000103519	adamts1	4.157	1.996	0.911	X	.	.	.	.	.
adamts10	L	gene16998	0.363	0.73	.	.	.	.	NA	NA	NA	NA	NA	NA	NA	XBXT10g007585	0.154	0.251	X	.	.	.	ENSDARG00000075188	adamts10	0	0.086	0.179	.	.	.	.	.	.
adamts12	L	gene44604	13.685	0.631	.	.	.	U	NA	NA	NA	NA	NA	NA	NA	XBXT10g008515	0.014	0.02	X	.	.	.	ENSDARG00000067549	adamts12	8.131	3.999	0.524	X	.	.	.	.	.
adamts14	LS	gene47241	0.863	0.424	.	.	.	.	gene50413	0.07	0.056	.	.	.	.	XBXT10g000214	0.013	0.018	X	.	.	.	NA	NA	NA	NA	NA	NA	NA	NA	NA	NA	NA
adamts15	LS	gene3237	0	0.03	.	.	.	.	gene41532	0	0.017	.	.	.	.	XBXT10g016107	0	0	X	.	.	.	NA	NA	NA	NA	NA	NA	NA	NA	NA	NA	NA
adamts16	L	gene11	8.302	8.293	.	.	.	.	NA	NA	NA	NA	NA	NA	NA	XBXT10g002382	0.316	0.423	X	.	.	.	NA	NA	NA	NA	NA	NA	NA	NA	NA	NA	NA
adamts17	LS	gene34869	4.612	4.654	.	.	.	.	gene12610	8.412	6.911	.	.	.	.	XBXT10g008187	0.456	0.34	X	.	X	.	NA	NA	NA	NA	NA	NA	NA	NA	NA	NA	NA
adamts18	LS	gene12653	0.104	0.223	.	.	.	.	gene35549	0.284	0.192	.	.	.	.	XBXT10g019730	0.115	0.129	X	.	.	.	ENSDARG00000001999	adamts18	0.161	0.801	28.398	X	X	X	X	X	X
adamts19	L	gene38732	0.619	0.962	.	.	.	.	NA	NA	NA	NA	NA	NA	NA	XBXT10g018039	0.253	0.374	X	.	.	.	NA	NA	NA	NA	NA	NA	NA	NA	NA	NA	NA
adamts2	LS	gene41570	0.351	0.332	.	.	.	.	gene7686	4.567	5.124	.	.	.	.	XBXT10g013586	0.137	0.274	X	.	X	U	NA	NA	NA	NA	NA	NA	NA	NA	NA	NA	NA
adamts3	LS	gene39340	2.963	8.95	.	.	.	D	gene13099	0.146	0.169	.	.	.	.	XBXT10g014362	6.033	6.843	X	X	.	.	NA	NA	NA	NA	NA	NA	NA	NA	NA	NA	NA
adamts4	LS	gene11620	0.053	0.031	.	.	.	.	gene34679	0.153	0.034	.	.	.	.	XBXT10g009451	0	0	X	.	.	.	NA	NA	NA	NA	NA	NA	NA	NA	NA	NA	NA
adamts5	LS	gene40065	0	0.013	.	.	.	.	gene7705	0	0.032	.	.	.	.	XBXT10g012919	0.492	0.288	X	.	.	.	NA	NA	NA	NA	NA	NA	NA	NA	NA	NA	NA
adamts6	S	NA	NA	NA	NA	NA	NA	NA	gene13358	15.099	8.729	.	.	.	.	XBXT10g009171	7.487	4.671	X	X	.	.	NA	NA	NA	NA	NA	NA	NA	NA	NA	NA	NA
adamts7	L	gene44937	0.091	0.036	.	.	.	.	NA	NA	NA	NA	NA	NA	NA	XBXT10g012892	0.306	1.55	X	X	.	.	NA	NA	NA	NA	NA	NA	NA	NA	NA	NA	NA
adamts8	L	gene35255	3.081	2.029	.	.	.	.	NA	NA	NA	NA	NA	NA	NA	XBXT10g016194	0	0.018	X	.	.	.	NA	NA	NA	NA	NA	NA	NA	NA	NA	NA	NA
adamts9	LS	gene38440	0.724	1.023	.	.	.	.	gene6669	0.789	0.036	.	.	.	.	XBXT10g001785	0.753	0.345	X	.	.	.	NA	NA	NA	NA	NA	NA	NA	NA	NA	NA	NA
adamtsl1	LS	gene43381	2.791	4.914	.	.	.	.	gene44632	1.648	3.821	.	.	.	.	XBXT10g014598	0.345	0.383	X	.	.	.	NA	NA	NA	NA	NA	NA	NA	NA	NA	NA	NA
adamtsl2	L	gene35393	0	0	.	.	.	.	NA	NA	NA	NA	NA	NA	NA	XBXT10g000653	0.057	0.053	X	.	.	.	NA	NA	NA	NA	NA	NA	NA	NA	NA	NA	NA
adamtsl3	LS	gene12755	0.03	0.015	.	.	.	.	gene34846	0.61	1.795	.	.	.	.	XBXT10g008578	0.061	0.068	X	.	.	.	NA	NA	NA	NA	NA	NA	NA	NA	NA	NA	NA
adamtsl4	LS	gene47591	0.078	0.172	.	.	.	.	gene11317	0.087	0.023	.	.	.	.	XBXT10g019184	0.028	0.119	X	.	.	.	NA	NA	NA	NA	NA	NA	NA	NA	NA	NA	NA
adamtsl5	LS	gene157	10.594	13.921	.	.	.	.	gene10522	0.319	0.22	.	.	.	.	XBXT10g008196	35.217	36.877	X	X	.	.	NA	NA	NA	NA	NA	NA	NA	NA	NA	NA	NA
adap1	LS	gene16884	2.749	0.063	.	.	.	.	gene3351	5.182	1.362	.	.	.	.	XBXT10g007149	0.574	0.313	X	.	.	.	NA	NA	NA	NA	NA	NA	NA	NA	NA	NA	NA
adap1l	L	gene12551	0.96	1.378	X	.	U	.	NA	NA	NA	NA	NA	NA	NA	XBXT10g016005	0	1.261	X	X	X	D	NA	NA	NA	NA	NA	NA	NA	NA	NA	NA	NA
adar	S	NA	NA	NA	NA	NA	NA	NA	gene41964	103.665	88.34	X	.	U	.	XBXT10g015749	20.532	20.662	X	X	.	.	ENSDARG00000012389	adar	54.114	63.624	74.525	X	.	X	X	.	.
adarb1	LS	gene18495	72.504	67.837	X	X	U	D	gene20069	69.686	65.441	X	X	.	D	XBXT10g007459	58.057	69.225	X	X	X	U	ENSDARG00000003544, ENSDARG00000041609	adarb1b, adarb1a	34.767	34.744	12.148	X	.	.	X	.	.
adarb2	LS	gene38222	1.775	0.08	.	.	.	.	gene47187	0.04	0	.	.	.	.	XBXT10g003952	3.312	2.566	X	X	.	.	ENSDARG00000071823	adarb2	1.241	1.297	2.459	X	.	.	X	.	.
adat1	S	NA	NA	NA	NA	NA	NA	NA	gene37413	6.954	8.403	.	.	.	.	XBXT10g016202	67.76	56.1	X	X	.	.	ENSDARG00000061348	adat1	7.154	4.83	2.239	X	.	.	.	.	.
adat2	L	gene50013	11.13	7.678	.	.	.	.	NA	NA	NA	NA	NA	NA	NA	XBXT10g009893	40.885	25.79	X	X	X	U	ENSDARG00000041944	adat2	27.827	18.77	16.195	X	.	.	X	.	.
adck1	L	gene16746	0.086	0.272	.	.	.	.	NA	NA	NA	NA	NA	NA	NA	XBXT10g017677	1.312	1.429	X	X	.	.	ENSDARG00000062561	adck1	20.677	11.471	3.121	X	.	.	.	.	.
adck2	S	NA	NA	NA	NA	NA	NA	NA	gene34977	7.73	2.656	.	.	.	.	XBXT10g006331	5.862	4.059	X	X	.	.	ENSDARG00000073923	adck2	42.901	24.127	13.966	X	.	.	.	.	.
adck5	L	gene18057	1.085	1.559	X	X	.	.	NA	NA	NA	NA	NA	NA	NA	XBXT10g000265	1.372	0.827	.	X	NA	NA	ENSDARG00000075405	adck5	16.983	13.259	5.003	X	.	.	.	.	.
adcy1	LS	gene4333	0	0.013	.	.	.	.	gene47113	0.69	0.47	.	.	.	.	XBXT10g007497	0	0	X	.	.	.	NA	NA	NA	NA	NA	NA	NA	NA	NA	NA	NA
adcy4	L	gene15919	22.532	25.146	.	.	.	.	NA	NA	NA	NA	NA	NA	NA	XBXT10g017886	30.124	38.214	X	X	.	.	NA	NA	NA	NA	NA	NA	NA	NA	NA	NA	NA
adcy6	LS	gene41129	23.602	22.402	.	.	.	D	gene4801	11.212	9.845	.	.	.	.	XBXT10g010725	19.904	19.195	X	X	.	.	ENSDARG00000027797, ENSDARG00000061445	adcy6b, adcy6a	27.099	23.915	6.514	X	.	.	X	.	.
adcy7	L	gene37734	18.21	16.306	.	.	.	.	NA	NA	NA	NA	NA	NA	NA	XBXT10g015681	2.336	3.122	X	X	.	.	ENSDARG00000060070	adcy7	0.233	2.105	1.037	X	.	.	.	.	.
adcy9	LS	gene3937	3.822	3.15	.	.	.	D	gene8769	8.657	5.393	.	.	.	.	XBXT10g017586	3.572	2.509	X	X	.	.	NA	NA	NA	NA	NA	NA	NA	NA	NA	NA	NA
adcyap1	LS	gene19245	0	0.572	X	X	.	.	gene50106	0.095	0.512	.	.	.	.	XBXT10g019743	0	0.055	X	.	.	.	ENSDARG00000004015, ENSDARG00000027740	adcyap1a, adcyap1b	0.946	0.18	0.655	.	.	.	.	.	.
adcyap1r1	LS	gene48560	0	0	.	.	.	.	gene40427	0	0.084	.	.	.	.	XBXT10g007989	0.092	0.064	X	.	.	.	ENSDARG00000053724, ENSDARG00000105201	adcyap1r1a, adcyap1r1a	0.129	0.137	0.21	.	.	.	.	.	.
add1	LS	gene6346	32.958	35.05	X	X	U	D	gene45784	38.892	39.912	X	X	.	.	XBXT10g011693	27.735	27.332	X	X	X	U	ENSDARG00000103962	add1	49.825	64.467	100.537	X	.	X	X	.	.
add2	LS	gene2693	0.034	0.098	.	.	.	.	gene14519	0.018	0.155	.	.	.	.	XBXT10g015703	0	0.089	X	.	.	.	ENSDARG00000074581	add2	0.263	0.1	0.104	.	.	.	.	.	.
add3	LS	gene17634	63.746	52.964	X	X	U	D	gene15501	13.734	9.46	.	.	.	D	XBXT10g016146	29.234	21.823	X	X	.	.	ENSDARG00000056250, ENSDARG00000040874	add3b, add3a	23.273	25.224	243.48	X	.	.	X	.	.
adgra1	LS	gene7287	0.134	0.479	.	.	.	.	gene16352	0.296	0.098	.	.	.	.	XBXT10g009248	0	0.05	X	.	.	.	ENSDARG00000054177	adgra1a	2.218	1.154	0.057	X	.	.	.	.	.
adgra2	L	gene4308	0.054	0.012	.	.	.	.	NA	NA	NA	NA	NA	NA	NA	XBXT10g017831	0.079	0.063	X	.	.	.	ENSDARG00000076994	adgra2	0.501	0.143	0.074	.	.	.	.	.	.
adgra3	L	gene6995	34.189	38.779	.	.	.	.	NA	NA	NA	NA	NA	NA	NA	XBXT10g018228	107.119	110.159	X	X	X	U	ENSDARG00000073673	adgra3	100.602	105.803	65.681	X	.	.	X	.	.
adgrb2	LS	gene37437	0.855	0.906	.	.	.	U	gene16885	0.029	0.014	.	.	.	.	XBXT10g009427	0.138	0.193	X	.	.	.	ENSDARG00000025667	adgrb2	2.451	0.699	0.486	X	.	.	.	.	.
adgre5	L	gene19543	0.558	0.991	.	.	.	.	NA	NA	NA	NA	NA	NA	NA	XBXT10g001172	12.846	48.48	X	X	.	.	NA	NA	NA	NA	NA	NA	NA	NA	NA	NA	NA
adgrf1	LS	gene13716	0	0	.	.	.	.	gene16967	3.354	0	.	.	.	.	XBXT10g013226	0	0.146	X	.	.	.	NA	NA	NA	NA	NA	NA	NA	NA	NA	NA	NA
adgrg1	L	gene12243	5.781	4.959	.	.	.	.	NA	NA	NA	NA	NA	NA	NA	XBXT10g007957	2.83	2.212	X	X	.	.	ENSDARG00000105643, ENSDARG00000027222	adgrg1, adgrg1	2.369	0.53	0.221	X	.	.	.	.	.
adgrg2	LS	gene19785	6.625	0.317	.	.	.	.	gene19344	1.338	0.175	.	.	.	.	XBXT10g005856	1.4	1.153	X	X	.	.	NA	NA	NA	NA	NA	NA	NA	NA	NA	NA	NA
adgrl1	LS	gene17108	0.112	0	.	.	.	.	gene40161	0.116	0.04	.	.	.	.	XBXT10g019141	0	0	X	.	.	.	NA	NA	NA	NA	NA	NA	NA	NA	NA	NA	NA
adgrl2	LS	gene10944	63.226	63.58	X	X	.	D	gene4473	47.369	42.071	X	X	U	D	XBXT10g011067	80.859	87.193	X	X	.	.	ENSDARG00000111712	adgrl2b.1	4.445	2.242	1.016	X	.	.	.	.	.
adgrl4	LS	gene14453	0	0	.	.	.	.	gene4924	0	0	.	.	.	.	XBXT10g009815	0.98	1.094	X	X	.	.	ENSDARG00000013653	adgrl4	7.841	7.612	2.268	X	.	.	.	.	.
adh1a	S	NA	NA	NA	NA	NA	NA	NA	gene43828	0	0.062	.	.	.	.	XBXT10g011397	8.053	8.099	X	X	.	.	NA	NA	NA	NA	NA	NA	NA	NA	NA	NA	NA
adh1b	L	gene43579	0.18	0	.	.	.	.	NA	NA	NA	NA	NA	NA	NA	XBXT10g019938	0	0	X	.	.	.	NA	NA	NA	NA	NA	NA	NA	NA	NA	NA	NA
adh1c	S	NA	NA	NA	NA	NA	NA	NA	gene20122	0	0	.	.	.	.	XBXT10g016119	0.076	0.426	X	.	.	.	NA	NA	NA	NA	NA	NA	NA	NA	NA	NA	NA
adh4	L	gene9770	0	0	.	.	.	.	NA	NA	NA	NA	NA	NA	NA	XBXT10g009804	0	0.467	X	.	.	.	NA	NA	NA	NA	NA	NA	NA	NA	NA	NA	NA
adh5	LS	gene3283	65.473	60.658	.	.	.	.	gene11804	12.328	2.322	.	.	.	U	XBXT10g012344	177.575	159.277	X	X	.	.	ENSDARG00000080010	adh5	147.298	157.523	88.651	X	.	.	.	.	.
adh7	S	NA	NA	NA	NA	NA	NA	NA	gene4296	0	0	.	.	.	.	XBXT10g001059	0	0	X	.	.	.	NA	NA	NA	NA	NA	NA	NA	NA	NA	NA	NA
adhfe1	S	NA	NA	NA	NA	NA	NA	NA	gene13073	0.033	0.091	.	.	.	.	XBXT10g018583	0	0.051	X	.	X	.	ENSDARG00000053518	adhfe1	23.707	59.111	20.34	X	.	.	.	.	.
adi1	LS	gene20036	4.885	4.162	X	.	.	.	gene11702	0	0	.	.	.	.	XBXT10g016388	33.847	17.078	X	X	.	.	ENSDARG00000020448	adi1	56.749	64.584	39.922	X	.	.	.	.	.
adipoq	LS	gene2408	0	0	.	.	.	.	gene19634	0	0	.	.	.	.	XBXT10g011047	0	0	X	.	.	.	NA	NA	NA	NA	NA	NA	NA	NA	NA	NA	NA
adipor1	LS	gene19648	6.077	4.71	.	.	.	U	gene20091	24.868	25.432	.	.	.	.	XBXT10g017412	73.741	70.241	X	X	.	.	ENSDARG00000042717, ENSDARG00000002912	adipor1b, adipor1a	223.721	267.004	74.292	X	.	.	.	.	.
adipor2	LS	gene9801	13.205	10.181	.	.	.	.	gene7378	33.227	22.974	X	X	U	.	XBXT10g013434	2.479	1.899	X	X	.	.	ENSDARG00000101849	adipor2	87.484	82.884	84.208	X	.	X	X	.	.
adk	S	NA	NA	NA	NA	NA	NA	NA	gene15402	123.889	134.687	.	.	.	.	XBXT10g007893	340.354	455.426	X	X	.	.	ENSDARG00000039429, ENSDARG00000095947	adka, adkb	113.675	162.602	137.417	X	.	.	X	.	.
adm	LS	gene20474	0.033	0	.	.	.	.	gene19230	0	0.126	.	.	U	.	XBXT10g000816	0	0.858	X	.	.	.	NA	NA	NA	NA	NA	NA	NA	NA	NA	NA	NA
admp	LS	gene16268	0	31.602	X	X	D	.	gene7858	0	28.504	X	.	D	.	XBXT10g001759	0	198.167	X	X	X	.	ENSDARG00000025372	admp	0	17.118	25.658	X	X	X	X	X	X
admp2	L	gene19759	0.025	5.653	X	X	.	.	NA	NA	NA	NA	NA	NA	NA	XBXT10g006415	0.631	10.792	X	X	X	D	NA	NA	NA	NA	NA	NA	NA	NA	NA	NA	NA
adnp	LS	gene13391	78.618	92.314	X	.	D	.	gene4002	55.047	55.392	X	.	.	.	XBXT10g014710	42.321	53.837	X	X	X	U	ENSDARG00000074293	adnpb	92.567	49.833	16.678	X	.	.	.	.	.
adnp2	LS	gene15151	73.663	86.118	X	.	U	.	gene20253	28.214	28.142	X	.	U	.	XBXT10g007441	21.183	26.331	X	X	X	U	ENSDARG00000028431, ENSDARG00000060937	adnp2b, adnp2a	117.113	70.164	31.239	X	.	.	X	.	.
ado	LS	gene3172	51.699	53.023	.	.	.	.	gene47612	9.123	14.514	.	.	.	.	XBXT10g000413	74.794	74.395	X	X	.	.	ENSDARG00000053571, ENSDARG00000042827	adob, adoa	135.341	82.781	29.897	X	.	.	.	.	.
adora1	LS	gene2138	2.748	1.463	.	.	.	.	gene17666	8.971	0.468	.	.	.	.	XBXT10g008929	67.435	34.303	X	X	.	.	ENSDARG00000075694	adora1b	0	0	11.449	X	.	.	.	.	.
adora2a	LS	gene42425	0.099	0.318	.	.	.	.	gene2038	0.071	0.342	.	.	.	.	XBXT10g005797	0.072	2.771	X	X	X	.	NA	NA	NA	NA	NA	NA	NA	NA	NA	NA	NA
adora2b	S	NA	NA	NA	NA	NA	NA	NA	gene9396	2.067	3.413	.	.	.	.	XBXT10g010201	1.223	0.722	X	X	.	.	ENSDARG00000002533	adora2b	0.374	1.172	0.222	X	.	.	.	.	.
adora3.1	L	gene12676	0	0	.	.	.	.	NA	NA	NA	NA	NA	NA	NA	XBXT10g011489	0	0	.	.	NA	NA	NA	NA	NA	NA	NA	NA	NA	NA	NA	NA	NA
adora3.2	L	gene40109	0.063	0	.	.	.	.	NA	NA	NA	NA	NA	NA	NA	XBXT10g013417	0	0	X	.	.	.	NA	NA	NA	NA	NA	NA	NA	NA	NA	NA	NA
adora3.3	L	gene12914	0	0	.	.	.	.	NA	NA	NA	NA	NA	NA	NA	XBXT10g011092	0.039	0	.	.	NA	NA	NA	NA	NA	NA	NA	NA	NA	NA	NA	NA	NA
adpgkl	L	gene1233	32.983	35.161	.	.	.	.	NA	NA	NA	NA	NA	NA	NA	XBXT10g009033	25.436	23.259	X	X	X	U	ENSDARG00000063525	adpgk	45.22	31.255	17.128	X	.	.	.	.	.
adprh	LS	gene35677	21.023	25.092	.	.	.	.	gene13152	0.108	0.13	.	.	.	.	XBXT10g013260	17.313	16.234	X	X	.	.	ENSDARG00000040712	adprh	11.296	9.172	2.239	X	.	.	.	.	.
adprhl1	LS	gene3660	0	0.015	.	.	.	.	gene10240	0.044	0.031	.	.	.	.	XBXT10g018425	0.013	0.019	X	.	.	.	ENSDARG00000041589	adprhl1	0	0	0	.	.	.	.	.	.
adprm	L	gene1437	43.926	37.777	.	.	.	.	NA	NA	NA	NA	NA	NA	NA	XBXT10g014456	17.636	12.187	X	X	.	.	ENSDARG00000026090	adprm	15.729	10.432	53.631	X	.	.	X	.	.
adprm.2	L	gene12141	0.031	0	.	.	.	.	NA	NA	NA	NA	NA	NA	NA	XBXT10g000649	0.226	0.063	.	.	NA	NA	ENSDARG00000026090	adprm	15.729	10.432	53.631	X	.	.	X	.	.
adprs	LS	gene11387	17.898	22.664	.	.	.	.	gene3154	2.012	2.09	.	.	.	.	XBXT10g012327	61.759	62.68	X	X	.	.	ENSDARG00000019338	adprhl2	25.578	20.289	6.171	X	.	.	.	.	.
adra1a	LS	gene19974	0.094	0.015	.	.	.	.	gene901	0	0.052	.	.	.	.	XBXT10g015817	0.652	0.385	X	.	.	.	ENSDARG00000028725, ENSDARG00000027638	adra1aa, adra1ab	0	0.165	0	.	.	.	.	.	.
adra1b	LS	gene40338	0	0	.	.	.	.	gene36357	0	0	.	.	.	.	XBXT10g000882	0.03	0.042	X	.	.	.	NA	NA	NA	NA	NA	NA	NA	NA	NA	NA	NA
adra1d	LS	gene3136	0.03	0	.	.	.	.	gene41550	0	0.038	.	.	.	.	XBXT10g004647	0	0	X	.	.	.	NA	NA	NA	NA	NA	NA	NA	NA	NA	NA	NA
adra2a	L	gene18248	0.056	0.118	.	.	.	.	NA	NA	NA	NA	NA	NA	NA	XBXT10g012027	0.044	0.804	X	.	.	.	ENSDARG00000040841	adra2a	0	1.311	0.249	X	.	.	.	.	.
adra2b	LS	gene16596	0.855	0.342	.	.	.	.	gene45006	0	0.082	.	.	.	.	XBXT10g029353	0.029	0	X	.	.	.	ENSDARG00000102096	adra2b	0	0	0.901	.	.	.	.	.	.
adra2c	LS	gene19684	0	0.027	.	.	.	.	gene44306	0	0	.	.	.	.	XBXT10g009134	0	0.048	X	.	.	.	ENSDARG00000069669	adra2c	0	0.108	0	.	.	.	.	.	.
adrb2	LS	gene7389	0.15	2.706	X	X	U	D	gene8791	3.474	5.816	.	.	.	.	XBXT10g005852	32.384	32.848	X	X	.	.	NA	NA	NA	NA	NA	NA	NA	NA	NA	NA	NA
adrm1	LS	gene7755	70.358	41.425	.	.	.	.	gene11779	61.56	51.744	.	.	.	.	XBXT10g012186	211.065	100.177	X	X	.	.	ENSDARG00000058560	adrm1	35.546	21.781	30.619	X	.	.	X	.	.
adsl	L	gene17107	70.229	103.215	.	.	.	.	NA	NA	NA	NA	NA	NA	NA	XBXT10g016098	70.723	49.295	X	X	.	.	ENSDARG00000017049	adsl	152.611	126.785	36.527	X	.	.	X	.	.
adss1	LS	gene5585	0	0	.	.	.	.	gene17762	0.304	0.1	.	.	.	.	XBXT10g013241	0.046	0.256	X	.	.	.	ENSDARG00000099517	adss1	11.296	7.542	7.776	X	.	.	.	.	.
adss2	L	gene5693	123.205	60.712	X	X	.	.	NA	NA	NA	NA	NA	NA	NA	XBXT10g016286	287.148	229.144	X	X	.	.	ENSDARG00000012399	adssl	259.47	236.327	127.931	X	.	.	X	.	.
adtrp	LS	gene3311	0	0.039	.	.	.	.	gene12031	0.03	0	.	.	.	.	XBXT10g003382	0	0	X	.	.	.	ENSDARG00000037810	adtrp1	18.087	14.823	6.452	X	.	.	.	.	.
aebp1	LS	gene14257	0	0	.	.	.	.	gene15833	0.549	1.374	.	.	.	.	XBXT10g007227	0	0.09	X	.	.	.	ENSDARG00000091726	aebp1	0	0	0.577	.	.	.	.	.	.
aebp2	LS	gene37376	16.762	19.495	.	.	.	.	gene10822	51.56	65.109	.	.	.	.	XBXT10g004297	2.493	4.404	X	X	.	.	ENSDARG00000006038	aebp2	67.016	83.572	75.769	X	.	X	X	.	.
aen	LS	gene11408	49.922	37.427	.	.	.	.	gene517	0.242	0.025	.	.	.	.	XBXT10g018850	188.677	155.962	X	X	.	.	NA	NA	NA	NA	NA	NA	NA	NA	NA	NA	NA
afap1	LS	gene18000	12.795	19.565	.	.	.	.	gene15546	2.849	8.934	.	.	.	.	XBXT10g014209	1.949	1.247	X	X	.	.	ENSDARG00000055284	afap1	0.503	0.239	0.398	.	.	.	.	.	.
afap1l1	LS	gene39917	0	0.098	.	.	U	.	gene16226	0	0	.	.	.	.	XBXT10g005932	0.017	0.347	X	.	.	.	ENSDARG00000056453, ENSDARG00000089162	afap1l1b, afap1l1a	113.456	65.989	2.852	X	.	.	.	.	.
afap1l2	LS	gene51015	0	0.078	.	.	.	.	gene384	0.037	0.04	.	.	.	.	XBXT10g007675	0.165	0.115	X	.	.	.	ENSDARG00000074806	afap1l2	1.282	0.081	6.181	X	.	.	X	.	.
afdn	LS	gene38725	61.332	58.367	.	.	.	.	gene35070	56.118	64.656	X	.	U	.	XBXT10g006454	30.56	35.356	X	X	.	.	NA	NA	NA	NA	NA	NA	NA	NA	NA	NA	NA
aff1	L	gene487	21.471	23.98	.	.	.	.	NA	NA	NA	NA	NA	NA	NA	XBXT10g003040	9.522	10.363	X	X	.	.	NA	NA	NA	NA	NA	NA	NA	NA	NA	NA	NA
aff2	LS	gene52	4.42	1.746	.	.	.	.	gene43524	0.036	0.021	.	.	.	.	XBXT10g012573	0.204	0.437	X	.	.	.	NA	NA	NA	NA	NA	NA	NA	NA	NA	NA	NA
aff4	LS	gene5891	74.417	77.264	X	X	D	D	gene1058	44.578	50.979	.	.	.	.	XBXT10g013336	64.242	80.745	X	X	.	.	ENSDARG00000001857	aff4	55.736	30.345	17.822	X	.	.	X	.	.
afg1l	L	gene14008	11.039	13.465	.	.	.	.	NA	NA	NA	NA	NA	NA	NA	XBXT10g000873	35.253	42.311	X	X	.	.	ENSDARG00000042902, ENSDARG00000011466	afg1lb, afg1la	119.208	83.253	17.639	X	.	.	.	.	.
afg3l1p	S	NA	NA	NA	NA	NA	NA	NA	gene11720	15.229	9.827	.	.	.	.	XBXT10g004511	13.008	6.784	X	X	.	.	NA	NA	NA	NA	NA	NA	NA	NA	NA	NA	NA
afg3l2	L	gene284	28.313	24.092	.	.	.	.	NA	NA	NA	NA	NA	NA	NA	XBXT10g000637	190.001	117.874	X	X	.	.	ENSDARG00000062272	afg3l2	55.764	45.714	3.398	X	.	.	.	.	.
afmid	L	gene9441	1.829	1.046	.	.	.	.	NA	NA	NA	NA	NA	NA	NA	XBXT10g004735	0.051	0	X	.	.	.	ENSDARG00000099106	afmid	10.39	7.204	1.336	X	.	.	.	.	.
aftph	LS	gene14499	11.064	10.379	.	.	.	.	gene13213	19.901	13.07	.	.	.	.	XBXT10g013399	24.338	29.864	X	X	.	.	NA	NA	NA	NA	NA	NA	NA	NA	NA	NA	NA
ag1	LS	gene3120	2.19	3.467	X	.	D	D	gene8814	0.696	0.417	.	.	.	.	XBXT10g014061	0.736	2.107	X	X	X	D	NA	NA	NA	NA	NA	NA	NA	NA	NA	NA	NA
aga	L	gene10277	13.189	10.814	.	.	.	.	NA	NA	NA	NA	NA	NA	NA	XBXT10g018301	31.421	33.29	X	X	.	.	ENSDARG00000004889	aga	33.053	36.76	31.277	X	.	.	.	.	.
agap1	L	gene13571	24.165	16.579	.	.	.	.	NA	NA	NA	NA	NA	NA	NA	XBXT10g002393	5.387	6.469	X	X	.	.	NA	NA	NA	NA	NA	NA	NA	NA	NA	NA	NA
agbl1	LS	gene7754	0.016	0.022	.	.	.	.	gene4941	3.132	7.191	.	.	.	U	XBXT10g006100	0.051	0.057	X	.	.	.	NA	NA	NA	NA	NA	NA	NA	NA	NA	NA	NA
agbl2	L	gene18754	0.241	0.22	.	.	.	.	NA	NA	NA	NA	NA	NA	NA	XBXT10g004048	7.606	7.226	X	X	.	.	ENSDARG00000079983	agbl2	0	0.344	1.231	X	.	.	.	.	.
agbl3	S	NA	NA	NA	NA	NA	NA	NA	gene966	12.036	7.658	.	.	.	.	XBXT10g003113	0.632	0.706	X	.	.	.	NA	NA	NA	NA	NA	NA	NA	NA	NA	NA	NA
agbl5	LS	gene13647	45.602	43.202	.	.	.	.	gene12840	56.64	24.972	.	.	.	.	XBXT10g017761	19.748	24.189	X	X	.	.	ENSDARG00000045900	agbl5	15.039	11.542	5.503	X	.	.	X	.	.
agfg1	LS	gene20014	43.891	36.065	.	.	.	.	gene12292	44.087	30.945	.	.	.	.	XBXT10g011097	26.775	25.806	X	X	.	.	ENSDARG00000019526, ENSDARG00000030020	agfg1b, agfg1a	52.262	26.692	20.296	X	.	.	X	.	.
aggf1	LS	gene42736	19.858	11.381	.	.	.	.	gene7966	38.876	26.884	X	.	U	.	XBXT10g010638	140.388	91.958	X	X	.	.	ENSDARG00000060109	aggf1	61.739	63.598	31.563	X	.	.	X	.	.
agk	LS	gene41864	2.98	2.314	.	.	.	.	gene43910	54.525	51.579	.	.	.	.	XBXT10g019469	63.176	39.377	X	X	.	.	ENSDARG00000009837	agk	32.348	32.137	19.376	X	.	.	.	.	.
agl	LS	gene6800	28.408	30.567	.	.	.	.	gene4802	5.939	7.842	.	.	U	.	XBXT10g009432	14.44	18.366	X	X	.	.	ENSDARG00000103811, ENSDARG00000100352	agla, aglb	14.9	7.346	1.655	X	.	.	.	.	.
agmat	LS	gene19251	0.364	0.143	.	.	.	.	gene13591	6.642	4.242	.	.	.	.	XBXT10g014230	0.794	0.847	X	.	.	.	ENSDARG00000059700	agmat	11.28	4.526	1.49	X	.	.	.	.	.
agmo	L	gene20079	7.86	0	.	.	.	.	NA	NA	NA	NA	NA	NA	NA	XBXT10g009117	0	0.226	X	.	.	.	ENSDARG00000025595	agmo	11.785	11.17	0.876	X	.	.	.	.	.
ago1	LS	gene11410	27.225	15.488	.	.	.	.	gene3494	31.739	27.231	.	.	.	.	XBXT10g023256	31.213	39.592	X	X	.	.	NA	NA	NA	NA	NA	NA	NA	NA	NA	NA	NA
ago2	L	gene12613	12.34	6.639	X	X	U	D	NA	NA	NA	NA	NA	NA	NA	XBXT10g002573	1.946	4.02	X	X	X	.	NA	NA	NA	NA	NA	NA	NA	NA	NA	NA	NA
ago4	LS	gene37082	119.301	125.478	.	.	.	.	gene27	133.031	128.522	.	.	.	.	XBXT10g002316	184.862	224.742	X	X	X	U	NA	NA	NA	NA	NA	NA	NA	NA	NA	NA	NA
agpat1	LS	gene6221	22.445	18.764	.	.	.	.	gene5284	9.343	18.261	.	.	.	.	XBXT10g011137	29.753	26.789	X	X	.	.	NA	NA	NA	NA	NA	NA	NA	NA	NA	NA	NA
agpat2	S	NA	NA	NA	NA	NA	NA	NA	gene9845	0.009	0.014	.	.	.	.	XBXT10g007325	4.784	1.734	X	X	.	.	ENSDARG00000101139	agpat2	7.312	10.005	38.04	X	.	X	X	.	.
agpat3	LS	gene5727	36.746	28.071	X	.	.	.	gene13045	38.434	32.484	X	.	U	.	XBXT10g016197	39.338	39.116	X	X	.	.	ENSDARG00000036549	agpat3	23.509	24.594	16.42	X	.	.	X	.	.
agpat4	LS	gene19795	27.09	18.52	.	.	.	.	gene16118	32.19	25.93	.	.	.	.	XBXT10g017038	94.327	82.062	X	X	.	.	ENSDARG00000069044	agpat4	35.58	41.364	26.121	X	.	.	X	.	.
agpat5	L	gene17213	9.068	8.974	.	.	.	.	NA	NA	NA	NA	NA	NA	NA	XBXT10g019594	97.512	103.386	X	X	.	.	ENSDARG00000063187	agpat5	126.993	150.325	91.958	X	.	.	X	.	.
agps	LS	gene14326	51.849	53.171	.	.	.	.	gene36829	22.395	20.966	.	.	.	.	XBXT10g000478	57.648	55.918	X	X	.	.	ENSDARG00000042821	agps	52.654	50.668	17.988	X	.	.	.	.	.
agr2	LS	gene10579	0.859	0.335	.	.	.	.	gene5728	3.938	0.116	.	.	.	.	XBXT10g001265	0.441	0.492	X	.	.	.	ENSDARG00000070480	agr2	0	0.371	0.155	.	.	.	.	.	.
agr3	L	gene34784	0	0	.	.	.	.	NA	NA	NA	NA	NA	NA	NA	XBXT10g014067	0	0.326	X	.	.	.	NA	NA	NA	NA	NA	NA	NA	NA	NA	NA	NA
agrp	LS	gene43976	0	0.037	.	.	.	.	gene48229	0	0	.	.	.	.	XBXT10g013702	4.332	4.56	X	X	.	.	ENSDARG00000069089	agrp	0	0	0	.	.	.	.	.	.
agt	LS	gene41693	0	0	.	.	.	.	gene19553	0	0.059	.	.	.	.	XBXT10g009210	0	0	X	.	.	.	ENSDARG00000016412	agt	0.357	0.204	0.425	.	.	.	.	.	.
agtpbp1	LS	gene3135	13.488	10.094	.	.	.	.	gene14433	0.292	0.272	.	.	.	.	XBXT10g018208	36.388	27.703	X	X	.	.	NA	NA	NA	NA	NA	NA	NA	NA	NA	NA	NA
agtr1	LS	gene7462	0.323	0.19	.	.	.	.	gene20182	0	0.042	.	.	.	.	XBXT10g001674	0.084	0.023	X	.	.	.	NA	NA	NA	NA	NA	NA	NA	NA	NA	NA	NA
agtr2	L	gene18453	0	0.033	.	.	.	.	NA	NA	NA	NA	NA	NA	NA	XBXT10g014472	0.102	0.071	X	.	.	.	ENSDARG00000035552	agtr2	0	1.183	0.38	X	.	.	.	.	.
agtrap	L	gene10404	58.663	57.167	.	.	.	.	NA	NA	NA	NA	NA	NA	NA	XBXT10g010140	43.797	28.583	X	X	.	.	ENSDARG00000077082	agtrap	1.303	0.371	0.31	X	.	.	.	.	.
agxt	LS	gene11396	0	0	.	.	.	.	gene48545	0	0	.	.	.	.	XBXT10g010646	0.088	0.184	X	.	.	.	ENSDARG00000018478, ENSDARG00000052099	agxtb, agxta	0	0	0	.	.	.	.	.	.
agxt2	LS	gene49441	0	0.084	.	.	.	.	gene9591	0.009	0.039	.	.	.	.	XBXT10g005060	0	0.055	X	.	.	.	ENSDARG00000100709	agxt2	0	0.263	0	.	.	.	.	.	.
ahctf1	L	gene324	129.618	110.848	.	.	.	.	NA	NA	NA	NA	NA	NA	NA	XBXT10g014838	84.966	89.263	X	X	.	.	ENSDARG00000077530	ahctf1	242.344	188.946	73.77	X	X	X	X	.	.
ahcy	LS	gene13422	206.201	209.577	.	.	.	.	gene16915	194.667	171.661	.	.	.	.	XBXT10g004866	275.207	244.572	X	X	.	.	ENSDARG00000005191	ahcy	340.456	299.322	154.64	X	.	.	.	.	.
ahcyl1	S	NA	NA	NA	NA	NA	NA	NA	gene49088	0.401	0.625	.	.	.	.	XBXT10g002140	34.061	39.751	X	X	.	.	ENSDARG00000056331	ahcyl1	0.495	0.894	0.981	.	.	.	.	.	.
ahcyl2	LS	gene9310	43.578	33.982	X	X	.	D	gene6041	39.772	28.11	X	X	U	D	XBXT10g013782	66.747	71.003	X	X	.	.	ENSDARG00000051873, ENSDARG00000039343	ahcyl2a, ahcyl2b	136.493	167.967	94.306	X	.	.	X	.	.
ahdc1	LS	gene42451	37.604	29.704	X	X	U	D	gene50366	41.34	31.363	X	X	U	D	XBXT10g012653	10.017	12.319	X	X	X	.	ENSDARG00000093453	ahdc1	0	0.052	0	.	.	.	.	.	.
ahi1	L	gene36962	15.797	9.245	.	.	.	.	NA	NA	NA	NA	NA	NA	NA	XBXT10g013561	47.725	36.917	X	X	.	.	ENSDARG00000044056	ahi1	8.836	5.946	18.689	X	.	.	X	.	.
ahnak	LS	gene11108	24.333	20.54	X	X	U	D	gene44374	0.381	0.892	.	.	D	.	XBXT10g015873	10.193	18.846	X	X	X	D	ENSDARG00000061764	ahnak	67.904	47.691	8.133	X	.	.	.	.	.
ahr	LS	gene42147	7.179	2.526	X	X	.	D	gene4850	6.483	5.564	.	.	.	.	XBXT10g002545	0.882	0.788	X	.	.	.	ENSDARG00000020046, ENSDARG00000021833	ahr1a, ahr2	7.782	4.369	2.163	X	.	.	.	.	.
ahrr	L	gene16830	0.082	0.069	.	.	.	.	NA	NA	NA	NA	NA	NA	NA	XBXT10g004475	0.251	0.128	X	.	.	.	ENSDARG00000052618, ENSDARG00000099702	ahrrb, ahrra	2.132	1.568	0	X	.	.	.	.	.
ahsa1	LS	gene15450	105.198	68.435	.	.	.	.	gene14011	141.726	109.741	X	.	U	.	XBXT10g003647	121.315	93.207	X	X	.	.	ENSDARG00000028664, ENSDARG00000100317	ahsa1a, ahsa1b	190.878	251.415	112.268	X	.	X	X	.	.
ahsg	L	gene11459	1.32	1.101	.	.	.	.	NA	NA	NA	NA	NA	NA	NA	XBXT10g007843	0.063	0.175	X	.	.	.	ENSDARG00000026764	ahsg1	0.393	0	0	.	.	.	.	.	.
aicda	LS	gene6955	0.088	0.065	.	.	.	.	gene49559	1.249	0.566	.	.	.	.	XBXT10g003435	0	0	X	.	.	.	ENSDARG00000015734	aicda	0	0	0	.	.	.	.	.	.
aida	LS	gene12706	10.837	11.435	.	.	.	.	gene3704	18.643	19.085	.	.	.	.	XBXT10g004253	15.32	16.687	X	X	.	.	ENSDARG00000014532	aida	38.856	46.348	10.542	X	.	.	.	.	.
aif1l	L	gene44232	0	0	.	.	.	.	NA	NA	NA	NA	NA	NA	NA	XBXT10g008133	3.061	2.92	.	X	NA	NA	ENSDARG00000009336	aif1l	438.246	595.633	608.739	X	.	X	X	.	.
aifm1	L	gene13130	57.281	29.316	.	.	.	.	NA	NA	NA	NA	NA	NA	NA	XBXT10g008804	104.015	89.821	X	X	.	.	ENSDARG00000058088	aifm1	151.498	102.456	51.932	X	.	.	X	.	.
aifm2	LS	gene13600	0.237	0.376	.	.	.	.	gene8072	19.289	13.575	.	.	.	U	XBXT10g016035	14.821	17.077	X	X	.	.	ENSDARG00000077549	aifm2	7.961	8.741	1.052	X	.	.	.	.	.
aifm3	LS	gene10176	8.564	9.358	.	.	.	D	gene12795	0.189	0.391	.	.	.	.	XBXT10g010497	5.818	5.3	X	X	.	.	NA	NA	NA	NA	NA	NA	NA	NA	NA	NA	NA
aimp1	LS	gene5437	12.199	11.259	.	.	.	.	gene2980	37.501	30.351	.	.	.	.	XBXT10g005745	33.374	28.616	X	X	.	.	ENSDARG00000036894, ENSDARG00000060036	aimp1b, aimp1a	89.777	116.026	74.968	X	.	.	X	.	.
aimp2	LS	gene3428	26.846	35.442	.	.	.	.	gene3043	50.193	46.758	.	.	.	.	XBXT10g012372	267.771	278.325	X	X	.	.	ENSDARG00000018903	aimp2	82.14	94.825	44.22	X	.	.	X	.	.
aip	L	gene41900	84.062	88.762	.	.	.	.	NA	NA	NA	NA	NA	NA	NA	XBXT10g010110	28.133	32.238	X	X	X	U	ENSDARG00000104437	aip	123.553	89.244	59.723	X	.	.	.	.	.
aipl1	LS	gene10615	0.02	0	.	.	.	.	gene43248	0	0	.	.	.	.	XBXT10g002562	0.303	0.536	X	.	.	.	ENSDARG00000075067	aipl1	0	0	0.895	.	.	.	.	.	.
aire	L	gene46343	0	0.03	.	.	.	.	NA	NA	NA	NA	NA	NA	NA	XBXT10g008550	0.035	0.049	X	.	.	.	ENSDARG00000056784	aire	0	0	0	.	.	.	.	.	.
ajap1	LS	gene12991	24.667	5.312	.	.	.	U	gene19570	0.029	0.087	.	.	.	.	XBXT10g009689	0	0.084	X	.	.	.	ENSDARG00000038655	ajap1	0	0	0.357	.	.	.	.	.	.
ajm1	LS	gene17901	0.008	0	.	.	.	.	gene38767	0	0.015	.	.	.	.	XBXT10g019537	0	0	X	.	.	.	NA	NA	NA	NA	NA	NA	NA	NA	NA	NA	NA
ak1	LS	gene19665	0.242	0	.	.	.	.	gene43850	0	0	.	.	.	.	XBXT10g018349	0.302	0.663	X	.	.	.	ENSDARG00000001950	ak1	0	0.189	0.394	.	.	.	.	.	.
ak2	LS	gene7943	59.689	37.473	X	.	.	.	gene5291	92.392	44.388	.	.	.	.	XBXT10g002563	278.861	186.148	X	X	X	U	ENSDARG00000005926	ak2	123.537	116.483	77.066	X	.	.	.	.	.
ak3	LS	gene4603	8.615	7.945	.	.	.	.	gene3910	1.317	0.986	.	.	.	D	XBXT10g018357	89.875	75.618	X	X	X	.	ENSDARG00000058226	ak3	1.222	13.416	482.775	X	.	X	X	.	.
ak4	LS	gene8151	0.461	0.162	.	.	.	D	gene14127	0.161	0.178	.	.	.	.	XBXT10g006774	1.165	0.823	X	X	.	.	ENSDARG00000006546	ak4	9.061	10.635	9.507	X	.	.	.	.	.
ak6	LS	gene4921	4.003	2.883	X	.	.	.	gene1360	85.968	55.885	X	X	D	.	XBXT10g014168	55.357	51.373	X	X	X	U	ENSDARG00000077870	taf9	142.142	138.725	95.569	X	.	.	X	.	.
ak7	S	NA	NA	NA	NA	NA	NA	NA	gene14614	8.475	9.525	.	.	.	U	XBXT10g007026	0.116	0.041	X	.	.	.	ENSDARG00000017023, ENSDARG00000019001	ak7b, ak7a	0.488	1.413	0.313	X	.	.	.	.	.
ak8	L	gene45030	7.55	4.23	.	.	.	U	NA	NA	NA	NA	NA	NA	NA	XBXT10g015949	10.041	9.135	X	X	.	.	ENSDARG00000030961	ak8	0	0.327	0.136	.	.	.	.	.	.
akap1	S	NA	NA	NA	NA	NA	NA	NA	gene17266	116.518	120.596	X	X	U	.	XBXT10g019114	224.727	249.781	X	X	.	.	ENSDARG00000089802, ENSDARG00000006062	akap1a, akap1b	148.774	125.958	33.02	X	.	X	X	.	.
akap10	L	gene38349	48.086	41.746	.	.	.	.	NA	NA	NA	NA	NA	NA	NA	XBXT10g007280	59.281	65.46	X	X	.	.	ENSDARG00000059549	akap10	99.354	61.823	12.996	X	.	.	X	.	.
akap11	LS	gene11299	17.401	23.363	.	.	.	.	gene5192	7.073	4.05	.	.	.	.	XBXT10g006214	20.109	21.74	X	X	.	.	NA	NA	NA	NA	NA	NA	NA	NA	NA	NA	NA
akap12	LS	gene49322	0.126	11.483	X	X	D	D	gene11524	6.43	4.265	.	.	.	.	XBXT10g002157	0.033	29.432	X	X	X	D	ENSDARG00000055678, ENSDARG00000091792	akap12b, akap12a	1.23	170.421	987.67	X	X	X	X	X	X
akap13	LS	gene45068	14.049	9.614	.	.	.	.	gene12385	28.851	19.356	.	.	.	.	XBXT10g019484	23.702	29.155	X	X	.	.	NA	NA	NA	NA	NA	NA	NA	NA	NA	NA	NA
akap14	S	NA	NA	NA	NA	NA	NA	NA	gene9239	0.028	0	.	.	.	.	XBXT10g003591	5.809	6.321	X	X	.	.	NA	NA	NA	NA	NA	NA	NA	NA	NA	NA	NA
akap17a	LS	gene188	89.94	67.298	.	.	.	.	gene12602	45.176	51.961	X	.	.	.	XBXT10g012252	248.11	189.07	X	X	X	U	ENSDARG00000104768, ENSDARG00000104768	akap17a, akap17a	73.927	50.883	33.059	X	.	.	X	.	.
akap6	L	gene476	0.013	0.036	.	.	.	.	NA	NA	NA	NA	NA	NA	NA	XBXT10g003475	5.624	5.814	X	X	.	.	ENSDARG00000077295	akap6	2.724	1.109	0.463	X	.	.	.	.	.
akap7	L	gene35897	16.304	23.674	.	.	.	.	NA	NA	NA	NA	NA	NA	NA	XBXT10g017852	64.191	65.52	X	X	.	.	ENSDARG00000043843	akap7	1.023	0	0.608	X	.	.	.	.	.
akap7.2	L	gene46009	3.458	5.973	.	.	.	.	NA	NA	NA	NA	NA	NA	NA	XBXT10g014148	8.018	6.349	.	X	NA	NA	ENSDARG00000043843	akap7	1.023	0	0.608	X	.	.	.	.	.
akap8l	L	gene8731	14.552	11.767	.	.	.	.	NA	NA	NA	NA	NA	NA	NA	XBXT10g009320	61.83	71.911	X	X	.	.	ENSDARG00000099635	akap8l	126.804	81.008	174.78	X	X	X	X	.	.
akap9	S	NA	NA	NA	NA	NA	NA	NA	gene41290	27.126	24.697	.	.	.	.	XBXT10g004701	11.704	19.539	X	X	.	.	ENSDARG00000079610	akap9	18.091	4.433	2.406	X	.	.	.	.	.
akirin1	LS	gene2545	148.302	177.314	X	.	.	.	gene17527	158.084	162.558	.	.	.	.	XBXT10g017426	542.802	623.988	X	X	X	D	ENSDARG00000039969	akirin1	69.755	73.096	67.96	X	X	X	X	.	.
akirin2	S	NA	NA	NA	NA	NA	NA	NA	gene45722	203.259	240.612	X	X	.	D	XBXT10g007715	336.724	384.002	X	X	X	.	ENSDARG00000058729	akirin2	187.92	185.746	161.6	X	.	.	X	.	.
akr1a1	LS	gene14888	47.693	31.372	.	.	.	.	gene13451	0.562	0	.	.	.	.	XBXT10g013452	16.279	14.171	X	X	.	.	ENSDARG00000052030, ENSDARG00000035257	akr1a1b, akr1a1a	84.405	58.768	28.423	X	.	.	.	.	.
akr1b1	LS	gene11762	37.595	48.288	.	.	.	.	gene6914	67.935	119.038	.	.	.	.	XBXT10g010361	22.398	17.946	X	X	.	.	ENSDARG00000006215	akr1b1.1	0	0.061	0.383	.	.	.	.	.	.
akr1c1	L	gene13472	14.069	26.02	.	.	.	.	NA	NA	NA	NA	NA	NA	NA	XBXT10g011043	0.059	0	X	.	.	.	NA	NA	NA	NA	NA	NA	NA	NA	NA	NA	NA
akr1c2	LS	gene5775	1.896	3.59	.	.	.	.	gene18957	0.042	0.058	.	.	.	.	XBXT10g014863	0.13	0.182	X	.	.	.	NA	NA	NA	NA	NA	NA	NA	NA	NA	NA	NA
akr1c3	L	gene67	3.67	3.602	.	.	.	.	NA	NA	NA	NA	NA	NA	NA	XBXT10g017949	0	0	X	.	.	.	NA	NA	NA	NA	NA	NA	NA	NA	NA	NA	NA
akr1c4	S	NA	NA	NA	NA	NA	NA	NA	gene18244	0	0	.	.	.	.	XBXT10g005930	7.305	4.88	X	X	.	.	NA	NA	NA	NA	NA	NA	NA	NA	NA	NA	NA
akr1c8p	S	NA	NA	NA	NA	NA	NA	NA	gene9017	0	4.848	.	.	.	.	XBXT10g011249	0.102	0.214	.	.	NA	NA	NA	NA	NA	NA	NA	NA	NA	NA	NA	NA	NA
akr1d1	LS	gene40	0.603	0.757	.	.	.	.	gene11056	0.032	0	.	.	.	.	XBXT10g019402	0.305	0.213	X	.	.	.	NA	NA	NA	NA	NA	NA	NA	NA	NA	NA	NA
akr7a2	LS	gene17842	40.15	36.242	.	.	.	.	gene6959	0.088	1.908	.	.	.	.	XBXT10g002093	9.822	6.775	X	X	X	U	NA	NA	NA	NA	NA	NA	NA	NA	NA	NA	NA
akt1	S	NA	NA	NA	NA	NA	NA	NA	gene7353	42.635	35.547	.	.	.	.	XBXT10g000087	16.325	15.793	X	X	.	.	ENSDARG00000099657	akt1	3.219	0.459	1.435	X	.	.	.	.	.
akt1s1	LS	gene36828	472.314	449.967	.	.	.	.	gene12365	106.178	129.721	.	.	.	.	XBXT10g018348	158.041	192.921	X	X	.	.	ENSDARG00000074667	akt1s1	199.057	231.78	207.824	X	.	.	X	.	.
akt2	LS	gene13026	77.539	80.801	.	.	.	.	gene11491	70.891	74.615	.	.	.	.	XBXT10g005457	197.609	181.217	X	X	X	U	ENSDARG00000011219	akt2	92.392	66.58	70.068	X	X	X	X	.	.
aktip	LS	gene16158	96.312	99.561	.	.	.	.	gene9968	95.676	96.594	.	.	.	.	XBXT10g003354	184.164	185.358	X	X	.	.	ENSDARG00000026862	aktip	220.893	262.733	57.013	X	.	.	.	.	.
alad	LS	gene15122	3.09	1.208	.	.	.	.	gene38525	13.741	17.216	.	.	.	.	XBXT10g009385	6.716	5.71	X	X	X	U	ENSDARG00000100372	alad	22.259	15.535	6.541	X	.	.	.	.	.
alas1	LS	gene18165	36.396	43.12	X	X	U	.	gene16075	40.864	38.484	.	.	.	.	XBXT10g004386	58.055	51.422	X	X	.	.	ENSDARG00000021059	alas1	241.712	239.144	226.258	X	.	X	X	.	.
alas2	LS	gene40791	0.036	0.047	.	.	.	.	gene16021	0	0	.	.	.	.	XBXT10g006206	0.028	0	X	.	.	.	ENSDARG00000038643	alas2	0	0.201	0.42	.	.	.	.	.	.
alb	LS	gene1766	0	0.039	.	.	.	.	gene14669	0	0	.	.	.	.	XBXT10g011627	0.037	0.052	X	.	.	.	NA	NA	NA	NA	NA	NA	NA	NA	NA	NA	NA
alcam	LS	gene17778	0.148	6.635	X	X	.	D	gene12056	0.224	2.524	X	X	.	D	XBXT10g002678	0.061	11.677	X	X	X	D	ENSDARG00000026531, ENSDARG00000058538	alcama, alcamb	0.355	5.952	520.976	X	.	X	X	.	X
aldh16a1	LS	gene4886	24.926	23.18	.	.	.	.	gene34735	57.219	54.209	.	.	.	.	XBXT10g014351	35.76	37.238	X	X	.	.	ENSDARG00000037935	aldh16a1	60.288	58.384	6.495	X	.	.	.	.	.
aldh18a1	L	gene4586	47.097	65.322	X	.	.	.	NA	NA	NA	NA	NA	NA	NA	XBXT10g008121	41.33	49.631	X	X	X	U	ENSDARG00000099579	aldh18a1	340.847	369.815	186.159	X	.	.	.	.	.
aldh1a1	LS	gene43161	0.071	0.105	.	.	.	.	gene37584	0.05	0.285	.	.	.	.	XBXT10g016860	0.083	0.077	X	.	.	.	NA	NA	NA	NA	NA	NA	NA	NA	NA	NA	NA
aldh1a2	LS	gene1923	47.015	40.11	X	X	.	.	gene1983	16.246	14.509	X	X	D	D	XBXT10g019318	173.424	201.577	X	X	X	.	ENSDARG00000053493	aldh1a2	0	0	60.723	X	.	.	X	.	.
aldh1a3	LS	gene6930	1.389	1.724	.	.	.	.	gene531	0.041	0.296	.	.	U	.	XBXT10g016563	0	0.126	X	.	.	.	ENSDARG00000076933	aldh1a3	0.531	0.756	0.158	.	.	.	.	.	.
aldh1b1	L	gene37032	0	0	.	.	.	.	NA	NA	NA	NA	NA	NA	NA	XBXT10g002925	0	0	X	.	.	.	NA	NA	NA	NA	NA	NA	NA	NA	NA	NA	NA
aldh1l1	L	gene15063	0	0.677	X	.	D	.	NA	NA	NA	NA	NA	NA	NA	XBXT10g013468	0.021	2.806	X	X	X	D	ENSDARG00000077004	aldh1l1	12.253	12.953	11.353	X	.	.	.	.	.
aldh1l2	LS	gene13215	4.171	1.238	.	.	.	.	gene19217	0.884	0.581	.	.	U	.	XBXT10g007950	3.02	3.329	X	X	.	.	NA	NA	NA	NA	NA	NA	NA	NA	NA	NA	NA
aldh2	L	gene9577	99.428	94.115	.	.	.	.	NA	NA	NA	NA	NA	NA	NA	XBXT10g008279	316.691	294.603	X	X	.	.	ENSDARG00000089924, ENSDARG00000028087	aldh2.1, aldh2.2	70.396	58.949	39.611	X	.	.	.	.	.
aldh3a2	LS	gene3412	21.906	31.129	.	.	.	.	gene8696	32.323	24.541	.	.	.	.	XBXT10g001033	160.699	192.446	X	X	.	.	ENSDARG00000029381, ENSDARG00000028259	aldh3a2b, aldh3a2a	46.062	47.515	2.625	X	.	.	.	.	.
aldh3b1	L	gene9275	120.274	130.534	.	.	.	.	NA	NA	NA	NA	NA	NA	NA	XBXT10g013697	275.041	222.628	X	X	.	.	ENSDARG00000013839	aldh3b1	66.956	53.219	79.976	X	.	.	X	.	.
aldh3b2	L	gene10012	11.433	6.408	.	.	.	D	NA	NA	NA	NA	NA	NA	NA	XBXT10g013243	0	0.103	X	.	.	.	ENSDARG00000035606	aldh3b2	0	0.339	1.415	X	.	.	.	.	.
aldh4a1	L	gene6061	28.733	13.261	.	.	.	.	NA	NA	NA	NA	NA	NA	NA	XBXT10g017634	6.165	4.475	.	X	NA	NA	ENSDARG00000038207	aldh4a1	9.498	7.686	10.748	X	.	.	.	.	.
aldh5a1	LS	gene20121	0.072	0.052	.	.	.	.	gene48316	8.281	11.038	.	.	.	.	XBXT10g007326	0.788	1.89	X	X	X	U	ENSDARG00000076544	aldh5a1	0.656	1.185	0.78	X	.	.	.	.	.
aldh6a1	LS	gene7153	50.486	47.402	.	.	.	.	gene5375	24.503	29.964	.	.	.	.	XBXT10g019747	88.476	96.932	X	X	.	.	ENSDARG00000053485	aldh6a1	61.257	55.289	42.108	X	.	.	.	.	.
aldh7a1	LS	gene10316	80.852	87.339	.	.	.	.	gene12271	89.874	93.8	.	.	.	.	XBXT10g005295	252.988	201.022	X	X	.	.	ENSDARG00000018426	aldh7a1	124.843	90.767	10.684	X	.	.	.	.	.
aldh8a1	L	gene45233	0	0	.	.	.	.	NA	NA	NA	NA	NA	NA	NA	XBXT10g001831	0	0	X	.	.	.	ENSDARG00000036776	aldh8a1	6.376	5.857	0.421	X	.	.	.	.	.
aldh9a1	S	NA	NA	NA	NA	NA	NA	NA	gene18019	50.448	20.301	.	.	.	.	XBXT10g012226	31.541	25.629	X	X	.	.	ENSDARG00000069100, ENSDARG00000037061	aldh9a1a.1, aldh9a1b	210.504	197.218	184.669	X	.	.	.	.	.
aldoa	LS	gene16277	129.001	102.66	X	X	U	.	gene43317	143.055	100.421	.	.	.	.	XBXT10g008606	85.71	75.986	X	X	.	.	ENSDARG00000011665, ENSDARG00000034470	aldoaa, aldoab	227.185	164.823	290.885	X	.	X	X	.	.
aldob	LS	gene15736	23.713	18.583	.	.	.	.	gene13544	0.963	0.909	.	.	.	.	XBXT10g007272	87.9	98.211	X	X	.	.	ENSDARG00000053684	aldob	0.438	48.234	500.53	X	X	X	X	X	X
aldoc	L	gene3368	233.139	174.618	.	.	.	.	NA	NA	NA	NA	NA	NA	NA	XBXT10g016064	356.11	277.17	X	X	.	.	ENSDARG00000057661, ENSDARG00000019702	aldoca, aldocb	18.443	31.879	1.929	X	.	.	.	.	.
alg1	L	gene10847	27.97	26.871	.	.	.	.	NA	NA	NA	NA	NA	NA	NA	XBXT10g001705	17.866	18.268	X	X	.	.	ENSDARG00000054963	alg1	184.901	127.639	6.537	X	.	.	.	.	.
alg10	LS	gene11348	18.614	23.297	.	.	.	.	gene37878	22.095	53.255	.	.	.	.	XBXT10g017215	24.108	25.8	X	X	.	.	ENSDARG00000053917, ENSDARG00000053917	alg10, alg10	57.525	17.075	3.879	X	.	.	.	.	.
alg11	LS	gene43860	39.395	28.617	.	.	.	.	gene14336	4.497	0.043	.	.	.	U	XBXT10g003187	89.343	46.506	X	X	.	.	NA	NA	NA	NA	NA	NA	NA	NA	NA	NA	NA
alg12	L	gene12515	10.46	12.327	.	.	.	.	NA	NA	NA	NA	NA	NA	NA	XBXT10g003510	32.131	18.637	X	X	.	.	ENSDARG00000041199	alg12	4.341	2.651	3.687	X	.	.	.	.	.
alg13l	L	gene15751	73.073	26.773	.	.	.	.	NA	NA	NA	NA	NA	NA	NA	XBXT10g005580	166.036	193.076	X	X	.	.	NA	NA	NA	NA	NA	NA	NA	NA	NA	NA	NA
alg14	LS	gene20268	8.525	9.043	.	.	.	.	gene3628	5.431	2.582	.	.	.	U	XBXT10g016467	22.414	12.033	X	X	.	.	ENSDARG00000103093	alg14	20.473	13.441	7.746	X	.	.	.	.	.
alg2	L	gene8415	8.555	5.693	.	.	D	.	NA	NA	NA	NA	NA	NA	NA	XBXT10g007388	72.13	53.573	X	X	.	.	ENSDARG00000070399	alg2	40.49	31.659	30.264	X	.	.	X	.	.
alg3	S	NA	NA	NA	NA	NA	NA	NA	gene532	13.144	11.065	.	.	.	.	XBXT10g001614	16.583	14.57	X	X	.	.	ENSDARG00000053155	alg3	116.739	141.88	64.718	X	.	.	X	.	.
alg5	LS	gene17262	97.926	66.411	.	.	.	.	gene6580	46.185	22.225	.	.	.	.	XBXT10g017431	162.941	113.408	X	X	.	.	ENSDARG00000061235	alg5	7.146	10.751	4.485	X	.	.	.	.	.
alg6	LS	gene40747	37.1	38.642	.	.	.	.	gene47596	60.762	29.143	.	.	D	.	XBXT10g018781	117.788	154.599	X	X	.	.	ENSDARG00000017617	alg6	40.013	55.04	36.021	X	.	.	.	.	.
alg8	S	NA	NA	NA	NA	NA	NA	NA	gene9205	67.097	77.197	.	.	.	.	XBXT10g016285	28.247	28.516	X	X	.	.	ENSDARG00000044627	alg8	29.283	23.095	4.643	X	.	.	.	.	.
alg9	L	gene38041	33.064	21.121	.	.	.	.	NA	NA	NA	NA	NA	NA	NA	XBXT10g010008	39.294	49.784	X	X	.	.	ENSDARG00000012840	alg9	27.96	21.232	6.426	X	.	.	.	.	.
alkal1	L	gene19240	0	0.145	.	.	.	.	NA	NA	NA	NA	NA	NA	NA	XBXT10g005186	0	0.09	X	.	.	.	ENSDARG00000074387	alkal1	0	0	0.133	.	.	.	.	.	.
alkal2	LS	gene47815	0	0.126	.	.	.	.	gene36602	0	0	.	.	.	.	XBXT10g012708	0.038	0.079	X	.	.	.	NA	NA	NA	NA	NA	NA	NA	NA	NA	NA	NA
alkbh1	L	gene40719	34.551	18.162	.	.	.	.	NA	NA	NA	NA	NA	NA	NA	XBXT10g016306	31.725	24.154	X	X	X	.	ENSDARG00000071164	alkbh1	39.468	25.619	12.157	X	.	.	X	.	.
alkbh2	L	gene7453	10.454	10.353	.	.	.	U	NA	NA	NA	NA	NA	NA	NA	XBXT10g019027	35.802	37.449	X	X	.	.	ENSDARG00000059856	alkbh2	43.747	6.662	1.425	X	.	.	.	.	.
alkbh3	L	gene36665	13.051	12.861	.	.	.	.	NA	NA	NA	NA	NA	NA	NA	XBXT10g019826	34.442	24.31	X	X	.	.	ENSDARG00000045606	alkbh3	7.338	5.462	3.878	X	.	.	.	.	.
alkbh4	L	gene1786	98.264	118.521	X	.	.	.	NA	NA	NA	NA	NA	NA	NA	XBXT10g000912	53.533	55.843	X	X	X	D	ENSDARG00000052247	alkbh4	130.121	36.557	35.335	X	.	.	.	.	.
alkbh5	LS	gene40816	24.466	26.523	X	X	U	D	gene49219	50.025	41.812	X	X	.	D	XBXT10g009137	118.323	106.636	X	X	X	U	ENSDARG00000063003	alkbh5	70.795	84.343	20.131	X	.	.	.	.	.
alkbh6	L	gene36327	33.92	21.962	.	.	U	U	NA	NA	NA	NA	NA	NA	NA	XBXT10g015365	8.904	8.153	X	X	.	.	ENSDARG00000077253	alkbh6	11.122	16.509	31.924	X	.	.	X	.	.
alkbh7	L	gene45634	14.584	7.911	.	.	.	.	NA	NA	NA	NA	NA	NA	NA	XBXT10g011705	15.741	10.117	X	X	.	.	ENSDARG00000037906	alkbh7	20.484	19.641	1.938	X	.	.	.	.	.
alkbh8	S	NA	NA	NA	NA	NA	NA	NA	gene40417	49.459	47.361	.	.	.	.	XBXT10g009609	97.263	112.906	X	X	.	.	ENSDARG00000060256	alkbh8	80.506	62.539	12.501	X	.	X	X	.	.
allc	L	gene5846	0	0	.	.	.	.	NA	NA	NA	NA	NA	NA	NA	XBXT10g009673	0	0	X	.	.	.	ENSDARG00000042562	allc	0	1.462	0.407	X	.	.	.	.	.
alms1	LS	gene11575	45.243	33.823	X	.	U	.	gene14346	25.708	24.582	.	.	.	.	XBXT10g016233	6.57	9.487	X	X	X	U	ENSDARG00000074779	alms1	35.68	15.463	6.623	X	.	.	X	.	.
alox12b	S	NA	NA	NA	NA	NA	NA	NA	gene3152	63.105	76.929	.	.	.	U	XBXT10g003032	32.824	34.919	X	X	.	.	NA	NA	NA	NA	NA	NA	NA	NA	NA	NA	NA
alox15b	L	gene19893	0.036	0.178	.	.	.	.	NA	NA	NA	NA	NA	NA	NA	XBXT10g001719	0	0	X	.	.	.	NA	NA	NA	NA	NA	NA	NA	NA	NA	NA	NA
alox5	LS	gene42253	1.078	0.514	.	.	.	U	gene48342	0	0.319	.	.	.	.	XBXT10g002275	0	0.047	X	.	.	.	NA	NA	NA	NA	NA	NA	NA	NA	NA	NA	NA
alox5ap	LS	gene11015	0	0	.	.	.	.	gene8430	0	0	.	.	.	.	XBXT10g013555	0	0	X	.	X	D	ENSDARG00000054755	alox5ap	0	0.262	0	.	.	.	.	.	.
alpi.1	L	gene43791	0	0	.	.	.	.	NA	NA	NA	NA	NA	NA	NA	XBXT10g000348	0.073	0	X	.	.	.	ENSDARG00000015273	alpi.1	0	0	0	.	.	.	.	.	.
alpi.2	L	gene38505	0	0	.	.	.	.	NA	NA	NA	NA	NA	NA	NA	XBXT10g000098	0.161	0.315	X	.	.	.	ENSDARG00000015273	alpi.1	0	0	0	.	.	.	.	.	.
alpk1	L	gene15435	6.099	1.803	.	.	.	.	NA	NA	NA	NA	NA	NA	NA	XBXT10g012185	19.752	25.348	X	X	.	.	NA	NA	NA	NA	NA	NA	NA	NA	NA	NA	NA
alpk2	LS	gene394	0	0	.	.	.	.	gene37146	0.483	0.299	.	.	.	.	XBXT10g015639	0	0	X	.	.	.	ENSDARG00000079637	alpk2	2.173	1.663	0.408	X	.	.	.	.	.
alpk3	LS	gene50983	0	0.038	.	.	.	.	gene4703	0.042	0.045	.	.	.	.	XBXT10g017284	0.137	0.232	X	.	.	.	NA	NA	NA	NA	NA	NA	NA	NA	NA	NA	NA
alpl	LS	gene13568	0.061	2.417	X	X	U	D	gene11111	0.026	0.113	.	.	.	.	XBXT10g001297	0.039	0.598	X	.	X	.	ENSDARG00000015546	alpl	3.266	24.668	42.067	X	X	X	X	.	X
alx1	LS	gene10030	0.14	1.105	.	.	.	.	gene41488	3.011	4.137	X	X	.	D	XBXT10g017995	7.8	5.649	X	X	.	.	ENSDARG00000062824	alx1	0	0	0	.	.	.	.	.	.
alyref	LS	gene19522	348.992	399.298	X	X	U	D	gene18345	152.049	235.258	X	.	U	D	XBXT10g003415	595.963	740.403	X	X	X	U	ENSDARG00000077732	alyref	273.35	161.538	223.241	X	X	X	X	.	.
amacr	L	gene6680	104.081	42.489	.	.	.	.	NA	NA	NA	NA	NA	NA	NA	XBXT10g003045	216.544	103.902	X	X	.	.	ENSDARG00000057435	amacr	56.668	45.326	8.72	X	.	.	.	.	.
ambn	LS	gene7074	0	0	.	.	.	.	gene9785	0	0	.	.	.	.	XBXT10g003384	0	0.073	X	.	.	.	ENSDARG00000075598	ambn	0	0	0	.	.	.	.	.	.
ambp	LS	gene11222	0.955	0.379	.	.	.	.	gene14396	0.031	0	.	.	.	.	XBXT10g007593	0.762	0.409	X	.	.	.	ENSDARG00000004296	ambp	0	0.133	0	.	.	.	.	.	.
ambra1	S	NA	NA	NA	NA	NA	NA	NA	gene6525	39.037	28.745	.	.	.	.	XBXT10g009909	3.069	3.329	X	X	.	.	NA	NA	NA	NA	NA	NA	NA	NA	NA	NA	NA
amd1	LS	gene924	34.481	19.831	X	X	.	D	gene4848	116.828	108.785	.	.	U	.	XBXT10g011349	62.124	53.935	X	X	.	.	ENSDARG00000043856	amd1	16.026	11.388	20.282	X	.	X	X	.	.
amdhd1	L	gene11258	30.992	34.598	.	.	.	.	NA	NA	NA	NA	NA	NA	NA	XBXT10g002004	44.218	53.256	X	X	.	.	NA	NA	NA	NA	NA	NA	NA	NA	NA	NA	NA
amdhd2	L	gene39732	12.513	10.589	.	.	.	.	NA	NA	NA	NA	NA	NA	NA	XBXT10g008794	22.03	19.661	X	X	.	.	ENSDARG00000100376	amdhd2	28.229	35.443	12.258	X	.	.	.	.	.
amelx	LS	gene18202	0	0	.	.	.	.	gene35518	0.182	0.061	.	.	.	.	XBXT10g008915	0	0.19	X	.	X	D	NA	NA	NA	NA	NA	NA	NA	NA	NA	NA	NA
amer2	LS	gene14566	0	0.26	.	.	.	.	gene12307	0	0	.	.	.	.	XBXT10g008735	0.034	0	X	.	.	.	ENSDARG00000075222	amer2	0	0	0.312	.	.	.	.	.	.
amer3	LS	gene49378	0.239	0	.	.	.	.	gene31175	0.295	0.479	.	.	.	.	XBXT10g000541	0.02	0	.	.	NA	NA	ENSDARG00000095819	si:dkey-231j24.3	0.547	0.208	0	.	.	.	.	.	.
amfr	LS	gene19194	59.382	60.397	.	.	.	.	gene12556	29.78	32.509	.	.	.	.	XBXT10g000304	122.4	164.487	X	X	.	.	ENSDARG00000105578, ENSDARG00000020218	amfrb, amfra	83.656	98.606	32.112	X	.	.	.	.	.
amh	LS	gene4904	0.008	0.044	.	.	.	.	gene2883	2.093	0.215	.	.	.	.	XBXT10g003317	0.078	0.181	X	.	.	.	ENSDARG00000014357	amh	0	0.053	0.11	.	.	.	.	.	.
amigo1	S	NA	NA	NA	NA	NA	NA	NA	gene15579	0	0	.	.	.	.	XBXT10g016923	0	0	X	.	.	.	ENSDARG00000079620	amigo1	0	0	2.085	X	.	.	.	.	.
amigo2	L	gene20143	0	0.024	.	.	.	.	NA	NA	NA	NA	NA	NA	NA	XBXT10g017207	0.059	0.027	X	.	.	.	NA	NA	NA	NA	NA	NA	NA	NA	NA	NA	NA
ammecr1	LS	gene6328	78.379	67.697	.	.	.	.	gene11393	87.898	80.331	.	.	.	.	XBXT10g009856	192.536	231.199	X	X	X	U	ENSDARG00000012892	ammecr1	117.929	102.01	138.619	X	X	X	X	.	.
amn	L	gene50667	0.085	0.236	.	.	.	.	NA	NA	NA	NA	NA	NA	NA	XBXT10g016600	0.036	0	X	.	.	.	ENSDARG00000062947	amn	0	0	0	.	.	.	.	.	.
amn1	L	gene44129	13.242	5.568	.	.	.	.	NA	NA	NA	NA	NA	NA	NA	XBXT10g007253	18.367	7.17	X	X	.	.	ENSDARG00000070478	amn1	7.195	4.786	3.387	X	.	.	.	.	.
amot	LS	gene18919	22.267	19.277	X	X	D	.	gene4402	5.638	5.375	.	.	.	.	XBXT10g014811	22.218	22.477	X	X	.	.	ENSDARG00000078335	amot	16.028	11.691	1.962	X	.	.	.	.	.
amotl1	LS	gene45095	0.324	0.915	.	.	.	.	gene9859	18.267	11.948	.	.	.	.	XBXT10g011729	2.782	2.347	X	X	X	.	NA	NA	NA	NA	NA	NA	NA	NA	NA	NA	NA
amotl2	LS	gene40840	18.345	13.547	.	.	.	.	gene17879	10.588	6.509	.	.	D	.	XBXT10g001975	4.754	24.452	X	X	X	D	ENSDARG00000061923, ENSDARG00000061948	amotl2a, amotl2b	107.994	95.673	111.388	X	X	X	X	X	X
ampd1	LS	gene4981	0	0	.	.	.	.	gene47660	0	0	.	.	.	.	XBXT10g014936	0.055	0.343	X	.	.	.	ENSDARG00000033832	ampd1	1.916	1.16	2.136	X	.	.	.	.	.
ampd2	S	NA	NA	NA	NA	NA	NA	NA	gene5702	0.088	0.05	.	.	.	.	XBXT10g001261	0.223	0.29	X	.	.	.	ENSDARG00000104491, ENSDARG00000029952	ampd2a, ampd2b	2.562	2.62	4.822	X	.	.	X	.	.
ampd3	LS	gene37154	0.139	0.019	.	.	.	.	gene39572	0.096	0.295	.	.	.	.	XBXT10g012369	0.43	0.476	X	.	.	.	ENSDARG00000032469, ENSDARG00000005800	ampd3b, ampd3a	0.213	0.806	0.063	.	.	.	.	.	.
amph	L	gene18402	0.352	0.252	.	.	.	.	NA	NA	NA	NA	NA	NA	NA	XBXT10g007261	0.225	0.228	X	.	.	.	ENSDARG00000007663	amph	0	0	0	.	.	.	.	.	.
amt	L	gene13233	8.779	11.138	.	.	.	.	NA	NA	NA	NA	NA	NA	NA	XBXT10g006741	29.117	25.442	X	X	.	.	ENSDARG00000010862	amt	78.452	30.017	2.483	X	.	.	.	.	.
amy2a	L	gene18838	0.027	0.037	.	.	.	.	NA	NA	NA	NA	NA	NA	NA	XBXT10g013536	0	0.079	X	.	.	.	ENSDARG00000013856	amy2a	0	0	0	.	.	.	.	.	.
amy2b	S	NA	NA	NA	NA	NA	NA	NA	gene40975	0	0	.	.	.	.	XBXT10g015144	80.566	89.917	X	X	.	.	NA	NA	NA	NA	NA	NA	NA	NA	NA	NA	NA
anapc1	S	NA	NA	NA	NA	NA	NA	NA	gene19092	58.294	64.729	.	.	.	.	XBXT10g004166	28.137	35.481	X	X	.	.	ENSDARG00000075687	anapc1	30.534	20.81	10.643	X	.	X	X	.	.
anapc10	LS	gene9099	107.072	48.284	.	.	D	.	gene4207	37.027	19.764	.	.	.	.	XBXT10g016447	290.669	243.263	X	X	.	.	ENSDARG00000090152	anapc10	13.972	15.845	18.24	X	.	.	.	.	.
anapc11	L	gene40961	113.818	164.599	.	.	.	.	NA	NA	NA	NA	NA	NA	NA	XBXT10g004415	245.32	231.202	X	X	X	.	ENSDARG00000102531	anapc11	54.301	36.682	14.922	X	.	.	.	.	.
anapc13.2	L	gene19376	38.508	34.465	.	.	.	.	NA	NA	NA	NA	NA	NA	NA	XBXT10g014346	0	0	X	.	.	.	ENSDARG00000078435	anapc13	70.248	22.715	18.701	X	.	.	.	.	.
anapc15	LS	gene5186	38.385	31.166	.	.	.	.	gene3500	76.296	77.23	.	.	.	.	XBXT10g000376	101.662	96.674	X	X	.	.	ENSDARG00000101285	anapc15	24.81	25.983	11.865	X	.	.	.	.	.
anapc16	LS	gene14883	36.822	32.671	.	.	.	.	gene559	5.489	0.059	.	.	.	D	XBXT10g015066	101.424	108.18	X	X	.	.	ENSDARG00000013822	anapc16	101.381	86.395	104.056	X	.	.	.	.	.
anapc2	L	gene14966	19.313	20.14	X	X	U	U	NA	NA	NA	NA	NA	NA	NA	XBXT10g006850	35.928	31.702	X	X	.	.	ENSDARG00000105035	anapc2	48.627	52.352	13.313	X	.	.	.	.	.
anapc4	L	gene16266	49.069	32.462	.	.	.	.	NA	NA	NA	NA	NA	NA	NA	XBXT10g017590	76.764	82.965	X	X	.	.	ENSDARG00000032237	anapc4	56.976	64.844	10.394	X	.	.	.	.	.
anapc5	L	gene3349	45.604	39.378	.	.	.	.	NA	NA	NA	NA	NA	NA	NA	XBXT10g005873	108.039	103.685	X	X	.	.	ENSDARG00000008461	anapc5	29.403	27.394	7.334	X	.	.	X	.	.
anapc7	LS	gene8749	45.395	47.918	.	.	.	.	gene174	88.057	76.294	.	.	.	.	XBXT10g013803	160.804	178.38	X	X	.	.	ENSDARG00000063005	anapc7	53.827	68.558	50.728	X	.	.	X	.	.
angel1	L	gene563	13.05	10.885	.	.	.	.	NA	NA	NA	NA	NA	NA	NA	XBXT10g001929	12.834	16.935	X	X	.	.	ENSDARG00000077567	angel1	25.681	22.277	4.351	X	.	.	.	.	.
angel2	LS	gene7598	36.559	20.243	.	.	.	.	gene5444	72.488	63.136	.	.	.	.	XBXT10g006933	52.938	32.054	X	X	.	.	ENSDARG00000016743	angel2	110.389	149.725	66.558	X	.	.	X	.	.
angpt1	LS	gene8169	0.014	0.01	.	.	.	.	gene9496	0.009	0	.	.	.	.	XBXT10g000867	13.702	10.656	X	X	.	.	ENSDARG00000030364	angpt1	0	0.631	0.822	.	.	.	.	.	.
angpt4	LS	gene10033	0.585	0.981	.	.	.	.	gene18106	0.459	0.999	.	.	.	.	XBXT10g004803	3.111	22.938	X	X	X	D	ENSDARG00000076787	angpt4	0.791	1.804	0	X	.	.	.	.	.
angpt4.2	LS	gene39888	0	0	.	.	.	.	gene1174	3.173	16.85	.	.	D	.	XBXT10g014761	0.042	37.659	X	X	X	D	ENSDARG00000076787	angpt4	0.791	1.804	0	X	.	.	.	.	.
angptl1	LS	gene15837	0	0	.	.	.	.	gene16195	0	0	.	.	.	.	XBXT10g007439	0.053	0	X	.	.	.	ENSDARG00000012071, ENSDARG00000100159	angptl1a, angptl1b	0.32	0.639	0	.	.	.	.	.	.
angptl2	LS	gene12733	0	0	.	.	.	.	gene1433	0	0	.	.	.	.	XBXT10g005616	0.02	0	X	.	.	.	ENSDARG00000024030, ENSDARG00000068369	angptl2a, angptl2b	0	0.049	0.205	.	.	.	.	.	.
angptl3	LS	gene18886	0	0	.	.	.	.	gene40148	0	0.016	.	.	.	.	XBXT10g006417	0.096	0.134	X	.	.	.	ENSDARG00000044365	angptl3	0	0	0	.	.	.	.	.	.
angptl4	LS	gene5598	1.994	5.923	X	.	.	.	gene10568	0.048	0	.	.	.	.	XBXT10g016204	0	0.161	X	.	.	.	ENSDARG00000035859	angptl4	0	0.379	8.556	X	.	.	X	.	.
angptl5	L	gene38888	0.499	0.157	.	.	.	.	NA	NA	NA	NA	NA	NA	NA	XBXT10g016614	0	0	X	.	.	.	ENSDARG00000056630	angptl5	0.759	1.19	2.709	X	.	.	.	.	.
angptl6	LS	gene17343	0.219	0.177	.	.	.	.	gene41501	0	0	.	.	.	.	XBXT10g016731	4.194	5.203	X	X	.	.	ENSDARG00000020265	angptl6	0	0.172	0	.	.	.	.	.	.
angptl7	LS	gene17088	0	0	.	.	.	.	gene12040	0	0.041	.	.	.	.	XBXT10g002720	0.084	0.059	X	.	.	.	ENSDARG00000027582	angptl7	0	0	0	.	.	.	.	.	.
ank1	LS	gene34364	0.172	3.376	.	.	.	U	gene42654	0.008	0	.	.	.	.	XBXT10g000535	0.204	0.186	X	.	.	.	ENSDARG00000074777, ENSDARG00000092143, ENSDARG00000059093	ank1b, ank1a, ank1a	2.008	0.973	0.372	X	.	.	.	.	.
ankar	L	gene18264	0.061	0.207	.	.	.	.	NA	NA	NA	NA	NA	NA	NA	XBXT10g002876	0.984	1.076	X	X	X	.	ENSDARG00000000516	ankar	0	0.472	0.411	.	.	.	.	.	.
ankdd1a	LS	gene276	2.401	2.345	.	.	.	.	gene7501	0.105	1.332	.	.	.	.	XBXT10g010380	5.26	6.412	X	X	.	.	ENSDARG00000098647	ankdd1a	95.824	94.116	15.586	X	.	.	.	.	.
ankdd1b	LS	gene5321	4.011	4.841	.	.	.	.	gene40782	0.05	0.282	.	.	U	.	XBXT10g013629	1.78	1.893	X	X	.	.	ENSDARG00000025866	ankdd1b	0	0.802	1.911	X	.	.	.	.	.
ankef1	L	gene18915	5.955	5.777	.	.	.	.	NA	NA	NA	NA	NA	NA	NA	XBXT10g013825	0.989	0.997	X	.	.	.	NA	NA	NA	NA	NA	NA	NA	NA	NA	NA	NA
ankfn1l	LS	gene46407	1.682	1.997	.	.	.	.	gene2710	0.105	0.21	.	.	.	.	XBXT10g001660	0.057	0.176	X	.	.	.	NA	NA	NA	NA	NA	NA	NA	NA	NA	NA	NA
ankfy1	LS	gene40796	33.495	35.99	.	.	.	.	gene44018	23.424	18.167	.	.	.	.	XBXT10g004843	51.229	51.745	X	X	.	.	ENSDARG00000061013	ankfy1	33.72	40.774	36.478	X	.	X	X	.	.
ankh	S	NA	NA	NA	NA	NA	NA	NA	gene1321	0	0.054	.	.	.	.	XBXT10g011773	0.508	0.378	X	.	.	.	ENSDARG00000071724, ENSDARG00000014969	ankha, ankhb	132.947	196.161	12.273	X	.	.	.	.	.
ankhd1	S	NA	NA	NA	NA	NA	NA	NA	gene14514	91.636	87.102	.	.	.	.	XBXT10g017583	55.828	65.647	X	X	.	.	ENSDARG00000077860	ankhd1	45.227	24.026	16.051	X	X	X	X	.	.
ankib1	LS	gene3753	21.205	21.48	.	.	.	.	gene8781	14.632	15.658	.	.	.	.	XBXT10g018568	11.068	11.779	X	X	.	.	ENSDARG00000060768	ankib1a	16.667	9.67	2.631	X	.	.	X	.	.
ankk1	L	gene16987	0.66	0.09	.	.	.	U	NA	NA	NA	NA	NA	NA	NA	XBXT10g003081	0.049	0.207	X	.	.	.	ENSDARG00000056921	ankk1	0	0	0.436	.	.	.	.	.	.
ankle2	LS	gene4450	144.983	126.377	X	.	.	U	gene50429	18.911	25.213	.	.	.	.	XBXT10g004826	180.009	172.164	X	X	.	.	ENSDARG00000035607	ankle2	130.667	99.746	10.832	X	.	.	X	.	.
ankmy1	L	gene17468	6.736	4.828	.	.	.	.	NA	NA	NA	NA	NA	NA	NA	XBXT10g009961	4.264	5.227	X	X	.	.	ENSDARG00000062702	ankmy1	0	0.063	0	.	.	.	.	.	.
ankmy2	S	NA	NA	NA	NA	NA	NA	NA	gene36530	43.574	28.713	.	.	.	.	XBXT10g000271	82.014	89.131	X	X	.	.	ENSDARG00000093668, ENSDARG00000005948	ankmy2b, ankmy2a	72.75	57.693	15.61	X	.	.	.	.	.
ankra2	L	gene9439	10.539	8.83	.	.	.	.	NA	NA	NA	NA	NA	NA	NA	XBXT10g012862	19.231	11.481	X	X	.	.	ENSDARG00000035399	ankra2	54.59	32.257	13.327	X	.	.	.	.	.
ankrd1	LS	gene10460	0.013	0	.	.	.	.	gene2826	0	0	.	.	.	.	XBXT10g019329	0.33	0.503	X	.	.	.	ENSDARG00000076192, ENSDARG00000075263	ankrd1b, ankrd1a	8.542	4.287	0.846	X	.	.	.	.	.
ankrd10	LS	gene8408	4.398	4.305	X	X	.	D	gene42531	6.945	5.144	X	X	.	D	XBXT10g019458	3.944	6.512	X	X	X	.	ENSDARG00000037100, ENSDARG00000004771	ankrd10a, ankrd10b	31.974	38.861	25.388	X	.	.	X	.	.
ankrd11	LS	gene10961	81.425	77.061	X	X	.	D	gene8317	88.886	87.252	X	X	D	D	XBXT10g017600	18.519	28.006	X	X	.	.	ENSDARG00000051886	ankrd11	34.169	19.679	28.218	X	X	X	X	.	X
ankrd12	LS	gene7110	62.053	48.542	.	.	.	.	gene12135	88.626	59.004	.	.	.	.	XBXT10g018161	34.27	37.89	X	X	.	.	ENSDARG00000052419	ankrd12	143.166	84.782	9.313	X	.	.	X	.	.
ankrd13a	LS	gene20101	98.387	112.385	.	.	.	.	gene14658	21.031	26.845	.	.	.	.	XBXT10g002695	57.597	52.408	X	X	.	.	ENSDARG00000061901	ankrd13a	76.211	80.539	27.394	X	.	.	.	.	.
ankrd13b	LS	gene41669	0.33	0.183	.	.	.	.	gene50925	0.022	0.12	.	.	.	.	XBXT10g011160	0.393	0.309	X	.	.	.	ENSDARG00000014652	ankrd13b	0	0	0	.	.	.	.	.	.
ankrd13c	LS	gene4452	56.379	52.165	X	.	.	.	gene19736	54.786	50.426	.	.	.	.	XBXT10g017729	75.786	97.885	X	X	.	.	ENSDARG00000103831	ankrd13c	60.63	66.509	42.937	X	.	.	.	.	.
ankrd16	L	gene5650	8.971	5.452	.	.	.	U	NA	NA	NA	NA	NA	NA	NA	XBXT10g005758	11.104	7.75	X	X	X	.	ENSDARG00000003822	ankrd16	3.116	5.329	3.705	X	.	.	.	.	.
ankrd2	LS	gene790	0	0	.	.	.	.	gene48630	0.83	0	.	.	.	.	XBXT10g011378	0	0.055	X	.	.	.	ENSDARG00000002722	ankrd2	0	0	0.401	.	.	.	.	.	.
ankrd22	LS	gene1390	0.109	0.193	.	.	.	.	gene3139	0.13	0.563	.	.	.	.	XBXT10g009244	0	0	X	.	.	.	ENSDARG00000002298	ankrd22	148.858	94.126	2.897	X	.	.	.	.	.
ankrd24	L	gene16816	0.3	0.467	.	.	.	.	NA	NA	NA	NA	NA	NA	NA	XBXT10g016309	0.078	0.055	X	.	.	.	ENSDARG00000062103	ankrd24	0.165	0.235	0	.	.	.	.	.	.
ankrd27	L	gene17289	40.81	41.45	.	.	.	.	NA	NA	NA	NA	NA	NA	NA	XBXT10g011230	58.476	69.931	X	X	.	.	ENSDARG00000089207	ankrd27	13.006	21.576	18.381	X	.	X	X	.	.
ankrd29	L	gene17121	2.024	5.536	.	.	.	.	NA	NA	NA	NA	NA	NA	NA	XBXT10g003871	0.441	0.501	X	.	.	.	ENSDARG00000057159	ankrd29	2.889	8.543	0.859	X	.	.	.	.	.
ankrd34a	LS	gene36142	0.027	0	.	.	.	.	gene35449	0.241	0	.	.	.	.	XBXT10g005300	0.066	0.062	X	.	.	.	NA	NA	NA	NA	NA	NA	NA	NA	NA	NA	NA
ankrd34b	LS	gene15488	0.029	0	.	.	.	.	gene48098	0.076	0	.	.	.	.	XBXT10g006263	0	0.022	X	.	.	.	NA	NA	NA	NA	NA	NA	NA	NA	NA	NA	NA
ankrd35	LS	gene37777	40.106	33.503	X	X	U	D	gene8675	0	0.009	.	.	.	.	XBXT10g019964	5.493	5.896	X	X	.	.	NA	NA	NA	NA	NA	NA	NA	NA	NA	NA	NA
ankrd37	LS	gene38188	55.731	9.874	.	.	U	.	gene45616	194.975	68.192	X	X	U	.	XBXT10g000028	86.591	43.157	X	X	.	.	ENSDARG00000056376	ankrd37	12.241	8.723	28.449	X	.	.	.	.	.
ankrd39	L	gene20140	16.815	6.84	.	.	.	.	NA	NA	NA	NA	NA	NA	NA	XBXT10g018599	38.787	25.655	X	X	.	.	ENSDARG00000041350	ankrd39	16.062	10.406	2.17	X	.	.	.	.	.
ankrd40	LS	gene45519	39.51	40.072	.	.	.	.	gene48936	45.752	29.631	.	.	.	.	XBXT10g006398	37.278	41.531	X	X	.	.	ENSDARG00000076490	ankrd40	4.563	5.768	3.656	X	.	.	.	.	.
ankrd42	L	gene12530	9.463	9.657	.	.	.	.	NA	NA	NA	NA	NA	NA	NA	XBXT10g005199	2.114	2.74	X	X	.	.	NA	NA	NA	NA	NA	NA	NA	NA	NA	NA	NA
ankrd45	LS	gene800	3.152	4.892	.	.	.	.	gene3641	2.257	1.566	.	.	.	.	XBXT10g016043	14.767	11.799	X	X	.	.	ENSDARG00000011326	ankrd45	1.816	1.036	0.432	X	.	.	.	.	.
ankrd46	LS	gene6099	1.949	2.66	.	.	.	D	gene13239	29.728	33.73	.	.	.	.	XBXT10g011329	38.961	27.619	X	X	.	.	ENSDARG00000015780, ENSDARG00000044328	ankrd46b, ankrd46a	9.583	6.049	28.407	X	.	.	X	.	.
ankrd49	LS	gene40734	0.696	0	.	.	.	.	gene8674	45.989	48.447	.	.	U	.	XBXT10g001085	17.425	10.432	X	X	.	.	ENSDARG00000023508	ankrd49	11.851	13.718	5.979	X	.	.	.	.	.
ankrd50	LS	gene2000	4.479	3.933	X	.	U	.	gene1567	12.985	12.27	.	.	.	.	XBXT10g002806	14.352	12.788	X	X	X	U	NA	NA	NA	NA	NA	NA	NA	NA	NA	NA	NA
ankrd52	LS	gene2048	79.887	66.407	X	.	.	.	gene12078	52.678	51.524	.	.	.	.	XBXT10g019489	80.656	103.984	X	X	.	.	ENSDARG00000036826	ankrd52a	103.878	73.496	25.425	X	.	X	X	.	.
ankrd53	L	gene12111	0.009	0.012	.	.	.	.	NA	NA	NA	NA	NA	NA	NA	XBXT10g006462	0	0.124	X	.	.	.	NA	NA	NA	NA	NA	NA	NA	NA	NA	NA	NA
ankrd54	LS	gene13091	38.547	48.094	.	.	.	D	gene12854	22.551	14.907	.	.	.	.	XBXT10g018755	36.674	34.973	X	X	.	.	ENSDARG00000055743	ankrd54	48.442	55.998	27.61	X	.	.	X	.	.
ankrd55	LS	gene9699	0.708	0.964	.	.	.	.	gene49771	0.084	0.437	.	.	.	.	XBXT10g011098	1.522	2.085	X	X	.	.	ENSDARG00000099182	ankrd55	0.697	1.059	0	X	.	.	.	.	.
ankrd6	LS	gene3264	0	0.047	.	.	.	.	gene2273	0.208	1.085	.	.	.	.	XBXT10g003623	0.081	0.076	X	.	.	.	ENSDARG00000057790, ENSDARG00000029370	ankrd6a, ankrd6b	1.161	0.158	9.858	X	.	.	.	.	.
ankrd63	L	gene10214	3.779	5.753	.	.	.	.	NA	NA	NA	NA	NA	NA	NA	XBXT10g019401	3.326	4.364	X	X	.	.	NA	NA	NA	NA	NA	NA	NA	NA	NA	NA	NA
ankrd65	L	gene5932	2.582	0.912	.	.	.	.	NA	NA	NA	NA	NA	NA	NA	XBXT10g006350	10.691	12.505	X	X	.	.	NA	NA	NA	NA	NA	NA	NA	NA	NA	NA	NA
ankrd9	L	gene2214	3.695	5.022	.	.	.	.	NA	NA	NA	NA	NA	NA	NA	XBXT10g003587	0.695	2.439	X	X	.	.	ENSDARG00000028804	ankrd9	0.504	0.862	0.899	.	.	.	.	.	.
anks1a	S	NA	NA	NA	NA	NA	NA	NA	gene5090	40.295	49.166	.	.	.	.	XBXT10g009027	68.387	73.003	X	X	.	.	NA	NA	NA	NA	NA	NA	NA	NA	NA	NA	NA
anks3	L	gene20041	28.678	32.085	.	.	.	.	NA	NA	NA	NA	NA	NA	NA	XBXT10g018238	29.155	21.633	X	X	.	.	ENSDARG00000038557	anks3	0.207	0.472	6.895	X	.	.	X	.	.
anks4b	LS	gene39595	0.044	0.115	.	.	.	.	gene46636	0.046	0	.	.	.	.	XBXT10g016108	0	0	X	.	.	.	ENSDARG00000036846	anks4b	0.271	0.309	1.879	X	.	.	.	.	.
ankub1	L	gene8476	0.03	0	.	.	.	.	NA	NA	NA	NA	NA	NA	NA	XBXT10g013834	2.302	3.127	X	X	.	.	NA	NA	NA	NA	NA	NA	NA	NA	NA	NA	NA
ankzf1	L	gene18223	34.362	25.01	.	.	.	.	NA	NA	NA	NA	NA	NA	NA	XBXT10g000462	46.803	33.453	X	X	.	.	ENSDARG00000041904	ankzf1	22.499	18.823	18.515	X	.	.	X	.	.
anln	L	gene44365	162.683	136.55	X	X	.	D	NA	NA	NA	NA	NA	NA	NA	XBXT10g003643	245.98	170.786	X	X	X	.	ENSDARG00000060917	anln	285.353	211.191	107.06	X	X	X	X	.	.
ano1	LS	gene37785	106.162	95.73	.	.	.	.	gene49400	0.378	0.728	.	.	.	.	XBXT10g016924	101.735	91.766	X	X	.	.	ENSDARG00000102335	ano1	86.634	51.665	11.404	X	.	.	.	.	.
ano10	L	gene10958	18.765	20.014	.	.	.	.	NA	NA	NA	NA	NA	NA	NA	XBXT10g012953	16.394	16.219	X	X	.	.	ENSDARG00000018159, ENSDARG00000057736	ano10b, ano10a	49.173	50.427	15.457	X	.	.	.	.	.
ano10l	L	gene11916	0.076	0.132	.	.	.	.	NA	NA	NA	NA	NA	NA	NA	XBXT10g012405	0	0.081	.	.	NA	NA	NA	NA	NA	NA	NA	NA	NA	NA	NA	NA	NA
ano2	LS	gene9529	0	0.041	.	.	.	.	gene16103	0	0	.	.	.	.	XBXT10g007862	9.919	6.484	X	X	.	.	ENSDARG00000101363	ano2b	0	0	0.265	.	.	.	.	.	.
ano5	LS	gene12555	23.914	23.53	X	X	U	D	gene40792	0.947	0.832	X	X	U	.	XBXT10g013685	21.454	25.781	X	X	.	U	ENSDARG00000036147	ano5b	54.279	41.633	2.256	X	.	X	X	.	.
ano6	L	gene11269	3.747	4.769	.	.	U	.	NA	NA	NA	NA	NA	NA	NA	XBXT10g004283	5.295	5.377	X	X	.	.	ENSDARG00000061544	ano6	0.138	0.157	2.789	X	.	.	.	.	.
ano7	L	gene16835	0.077	0	.	.	.	.	NA	NA	NA	NA	NA	NA	NA	XBXT10g004197	0	0	X	.	.	.	NA	NA	NA	NA	NA	NA	NA	NA	NA	NA	NA
ano8	L	gene44583	10.687	7.041	.	.	.	.	NA	NA	NA	NA	NA	NA	NA	XBXT10g018087	0.766	0.849	X	.	X	D	ENSDARG00000076265	ano8a	0	0.148	0.103	.	.	.	.	.	.
anos1	LS	gene35690	0.141	0.137	.	.	.	.	gene19688	0.113	0.158	.	.	.	.	XBXT10g014534	0.679	0.821	X	.	.	.	NA	NA	NA	NA	NA	NA	NA	NA	NA	NA	NA
anp32a	LS	gene16577	24.777	43.141	X	X	U	U	gene15898	19.059	14.534	.	.	.	.	XBXT10g013001	14.412	18.79	X	X	X	U	ENSDARG00000006487	anp32a	99.226	189.473	593.624	X	.	X	X	.	.
anp32b	L	gene15784	66.897	107.601	.	.	.	.	NA	NA	NA	NA	NA	NA	NA	XBXT10g016867	134.7	158.762	X	X	.	.	ENSDARG00000023330	anp32b	392.86	504.99	1240.35	X	X	X	X	.	X
anp32c	LS	gene17236	601.246	705.995	X	X	.	D	gene15272	412.552	589.828	X	X	.	D	XBXT10g012754	1155.7	1494.85	X	X	X	.	NA	NA	NA	NA	NA	NA	NA	NA	NA	NA	NA
anp32e	LS	gene2458	111.834	120.654	X	X	U	D	gene18526	91.076	148.403	X	X	U	D	XBXT10g018600	407.41	548.131	X	X	X	U	ENSDARG00000054804	anp32e	471.436	587.237	2069.17	X	X	X	X	X	X
anpep	LS	gene3760	0	0	.	.	.	.	gene18572	0.026	0.355	.	.	.	.	XBXT10g007537	0.035	0.049	X	.	.	.	ENSDARG00000103878, ENSDARG00000041083	anpepb, anpepa	0.356	0.198	0.212	.	.	.	.	.	.
antkmt	L	gene11523	1.966	1.411	.	.	.	.	NA	NA	NA	NA	NA	NA	NA	XBXT10g004351	0	0	X	.	.	.	ENSDARG00000041223	antkmt	21.508	13.809	2.78	X	.	.	.	.	.
antxr1	LS	gene44596	2.01	2.536	.	.	.	.	gene16438	0	0.052	.	.	.	.	XBXT10g005467	0.572	0.358	X	.	X	D	ENSDARG00000063612	antxr1c	0	0.203	0.581	.	.	.	X	.	.
antxr2	LS	gene16181	3.296	8.469	.	.	.	.	gene34468	0.023	0.079	.	.	.	.	XBXT10g004339	0.048	0.067	X	.	.	.	ENSDARG00000063011, ENSDARG00000104118	antxr2b, antxr2a	0.459	1.014	0.478	X	.	.	.	.	.
anxa1.1	LS	gene1078	25.173	20.242	.	.	.	U	gene9914	52.164	40.835	.	.	.	.	XBXT10g003866	112.179	129.677	X	X	.	.	ENSDARG00000026726, ENSDARG00000100095	anxa1a, anxa1b	2.811	3.329	416.32	X	.	.	X	.	.
anxa1.2	LS	gene11418	0.039	0.277	.	.	.	.	gene50769	53.645	56.483	.	.	.	.	XBXT10g010346	27.14	22.638	.	X	NA	NA	ENSDARG00000026726	anxa1a	0	1.526	387.284	X	.	.	X	.	.
anxa1.3	LS	gene50947	0	0	.	.	.	.	gene12835	0.076	0.056	.	.	.	.	XBXT10g004733	0	0	X	.	.	.	ENSDARG00000026726	anxa1a	0	1.526	387.284	X	.	.	X	.	.
anxa10	LS	gene15492	0	0	.	.	.	.	gene8795	0	0	.	.	.	.	XBXT10g000136	0.565	0.613	X	.	.	.	NA	NA	NA	NA	NA	NA	NA	NA	NA	NA	NA
anxa11	LS	gene7871	0.163	0.083	.	.	.	.	gene1029	71.184	69.672	.	.	.	.	XBXT10g000987	6.308	6.878	X	X	.	.	NA	NA	NA	NA	NA	NA	NA	NA	NA	NA	NA
anxa13	LS	gene4830	0	0.106	.	.	.	.	gene39942	0	0	.	.	.	.	XBXT10g016068	0	0	X	.	.	.	ENSDARG00000013976	anxa13	12.997	16.18	6.945	X	.	.	.	.	.
anxa2	LS	gene9244	12.052	14.715	X	X	U	D	gene646	2.653	3.217	X	X	U	D	XBXT10g006213	187.576	166.111	X	X	X	U	ENSDARG00000003216, ENSDARG00000053625	anxa2a, anxa2b	0	0.246	46.607	X	.	.	X	.	.
anxa3	LS	gene353	199.376	175.657	.	.	.	.	gene4754	0.569	5.995	.	.	.	.	XBXT10g009182	148.385	117.122	X	X	.	.	ENSDARG00000044254, ENSDARG00000009196	anxa3b, anxa3a	18.653	6.851	17.083	X	.	.	.	.	.
anxa4	LS	gene3499	134.937	68.502	.	.	.	D	gene2603	0.043	3.47	.	.	.	D	XBXT10g003114	133.88	83.056	X	X	X	D	ENSDARG00000036456	anxa4	30.639	22.755	7.191	X	.	.	.	.	.
anxa5	LS	gene5988	26.428	28.32	.	.	.	.	gene14536	45.2	30.703	.	.	.	.	XBXT10g015028	182.788	154.623	X	X	.	.	ENSDARG00000026406, ENSDARG00000016470	anxa5a, anxa5b	175.88	60.842	143.273	X	.	.	.	.	.
anxa6	LS	gene8554	0.679	0.099	.	.	.	.	gene15916	0	0.062	.	.	.	.	XBXT10g011427	0.059	0.164	X	.	.	.	ENSDARG00000013335	anxa6	19.241	0.157	28.764	X	.	.	X	.	.
anxa7	LS	gene19590	109.141	110.504	X	X	D	D	gene6617	87.945	82.538	X	X	.	D	XBXT10g011120	241.752	225.512	X	X	.	.	NA	NA	NA	NA	NA	NA	NA	NA	NA	NA	NA
anxa9	L	gene16584	0.732	0.949	.	.	.	.	NA	NA	NA	NA	NA	NA	NA	XBXT10g006910	0.214	0.12	X	.	.	.	NA	NA	NA	NA	NA	NA	NA	NA	NA	NA	NA
aoah	L	gene7455	1.913	2.489	.	.	.	D	NA	NA	NA	NA	NA	NA	NA	XBXT10g018410	0	0.406	X	.	.	.	NA	NA	NA	NA	NA	NA	NA	NA	NA	NA	NA
aoc1	S	NA	NA	NA	NA	NA	NA	NA	gene44876	0	0	.	.	.	.	XBXT10g020013	0	0	X	.	.	.	ENSDARG00000061355	aoc1	0	0	0	.	.	.	.	.	.
aoc3	L	gene5471	0.068	0.323	.	.	.	.	NA	NA	NA	NA	NA	NA	NA	XBXT10g010550	0	0.043	X	.	.	.	NA	NA	NA	NA	NA	NA	NA	NA	NA	NA	NA
aopep	L	gene11112	10.006	9.273	.	.	.	.	NA	NA	NA	NA	NA	NA	NA	XBXT10g008568	19.576	19.648	X	X	.	.	ENSDARG00000068461	aopep	8.121	7.499	2.099	X	.	.	.	.	.
aox1	LS	gene44214	30.849	35.047	.	.	.	.	gene13711	0.146	0.346	.	.	.	.	XBXT10g011622	28.438	31.83	X	X	.	.	ENSDARG00000020054	aox6	10.216	10.848	3.265	X	.	.	.	.	.
ap1ar	LS	gene5179	5.72	6.302	.	.	.	.	gene2167	17.113	20.173	.	.	.	.	XBXT10g016099	157.359	194.088	X	X	.	.	ENSDARG00000031496	ap1ar	1.607	1.291	5.602	X	.	.	X	.	.
ap1b1	LS	gene5691	52.131	51.133	.	.	.	.	gene8433	48.59	59.164	.	.	.	.	XBXT10g008348	94.977	104.396	X	X	.	.	ENSDARG00000020621	ap1b1	140.649	103.278	17.805	X	.	.	X	.	.
ap1g1	LS	gene10432	42.342	44.379	.	.	.	.	gene19054	62.37	69.3	X	X	U	.	XBXT10g012827	55.66	65.452	X	X	.	.	ENSDARG00000102394	ap1g1	99.281	67.642	24.425	X	.	.	X	.	.
ap1g2	LS	gene16652	9.545	6.95	.	.	.	D	gene4749	3.248	2.458	.	.	.	.	XBXT10g001487	0.816	1.213	X	X	.	.	ENSDARG00000054337	ap1g2	52.114	60.661	4.723	X	.	.	.	.	.
ap1m1	S	NA	NA	NA	NA	NA	NA	NA	gene713	66.585	51.743	.	.	.	.	XBXT10g002597	134.777	114.768	X	X	.	.	NA	NA	NA	NA	NA	NA	NA	NA	NA	NA	NA
ap1m2	LS	gene12316	7.814	8.032	.	.	.	D	gene19463	62.955	65.919	.	.	.	.	XBXT10g002836	21.15	8.562	X	X	.	.	ENSDARG00000096454	ap1m2	68.43	71.301	7.416	X	.	.	.	.	.
ap1s1	LS	gene12845	69.217	67.898	X	.	U	.	gene16204	8.945	9.991	.	.	.	.	XBXT10g005830	34.769	27.227	X	X	.	.	ENSDARG00000056803	ap1s1	158.959	164.122	134.849	X	.	.	.	.	.
ap1s2	LS	gene19899	5.434	7.585	.	.	.	.	gene3286	3.399	1.627	.	.	.	.	XBXT10g012521	30.745	16.686	X	X	.	.	ENSDARG00000058504	ap1s2	112.575	134.984	50.247	X	.	.	.	.	.
ap1s3	S	NA	NA	NA	NA	NA	NA	NA	gene39434	5.692	4.477	.	.	.	.	XBXT10g009443	207.478	117.982	X	X	X	U	NA	NA	NA	NA	NA	NA	NA	NA	NA	NA	NA
ap2a2	L	gene45418	26.498	25.612	.	.	.	.	NA	NA	NA	NA	NA	NA	NA	XBXT10g019314	23.089	23.998	X	X	.	.	NA	NA	NA	NA	NA	NA	NA	NA	NA	NA	NA
ap2b1	LS	gene4184	42.884	53.517	.	.	.	.	gene4059	33.077	46.503	.	.	.	.	XBXT10g009490	53.766	54.531	X	X	.	.	ENSDARG00000035152	ap2b1	50.035	44.812	29.823	X	.	.	.	.	.
ap2m1	LS	gene37191	110.94	123.206	.	.	.	.	gene14839	120.013	123.067	.	.	.	.	XBXT10g000939	384.336	369.314	X	X	.	.	ENSDARG00000002790, ENSDARG00000033899	ap2m1a, ap2m1b	307.988	267.154	73.565	X	.	.	X	.	.
ap2s1	S	NA	NA	NA	NA	NA	NA	NA	gene15856	28.198	12.175	.	.	.	.	XBXT10g011374	49.22	30.306	X	X	.	.	ENSDARG00000026967	ap2s1	35.43	8.031	9.137	X	.	.	X	.	.
ap3b1	L	gene4326	22.749	26.049	.	.	.	.	NA	NA	NA	NA	NA	NA	NA	XBXT10g015564	42.304	57.186	X	X	.	.	ENSDARG00000100082	ap3b1a	74.282	36.384	50.299	X	.	.	.	.	.
ap3b2	S	NA	NA	NA	NA	NA	NA	NA	gene17637	15.233	20.509	.	.	.	.	XBXT10g012042	0.066	0.056	X	.	.	.	NA	NA	NA	NA	NA	NA	NA	NA	NA	NA	NA
ap3d1	LS	gene15088	52.801	54.423	.	.	.	.	gene11687	73.349	72.99	.	.	.	.	XBXT10g018411	35.71	50.608	X	X	.	.	ENSDARG00000071424	ap3d1	70.746	58.047	13.028	X	.	.	X	.	.
ap3m2	LS	gene9405	32.547	39.006	.	.	.	.	gene7995	57.552	52.661	.	.	.	.	XBXT10g000035	121.134	122.798	X	X	.	.	NA	NA	NA	NA	NA	NA	NA	NA	NA	NA	NA
ap3s1	S	NA	NA	NA	NA	NA	NA	NA	gene11545	129.678	98.142	.	.	.	.	XBXT10g011202	119.375	134.662	X	X	.	.	NA	NA	NA	NA	NA	NA	NA	NA	NA	NA	NA
ap3s2	S	NA	NA	NA	NA	NA	NA	NA	gene8439	8.437	6.694	.	.	.	.	XBXT10g015537	79.685	62.056	X	X	X	U	ENSDARG00000039882	ap3s2	43.795	10.737	5.989	X	.	.	.	.	.
ap4b1	L	gene17584	5.893	6.558	.	.	.	.	NA	NA	NA	NA	NA	NA	NA	XBXT10g018324	15.966	12.399	X	X	.	.	ENSDARG00000013726	ap4b1	3.883	3.191	1.222	X	.	.	.	.	.
ap4e1	LS	gene2709	0.353	0.667	.	.	.	.	gene46217	43.089	50.245	.	.	.	.	XBXT10g016723	69.724	73.141	X	X	.	.	ENSDARG00000103684	ap4e1	36.133	20.554	7.734	X	.	.	.	.	.
ap4m1	LS	gene12494	0	0	.	.	.	.	gene1033	15.82	15.713	.	.	.	.	XBXT10g015356	2.023	2.448	X	X	.	.	ENSDARG00000056871	ap4m1	33.243	18.327	9.882	X	.	.	.	.	.
ap4s1	L	gene10657	12.72	10.122	.	.	.	.	NA	NA	NA	NA	NA	NA	NA	XBXT10g009257	107.364	29.972	X	X	.	.	ENSDARG00000054220	ap4s1	8.288	7.633	4.549	X	.	.	.	.	.
ap5b1	L	gene11434	50.493	56.177	.	.	.	.	NA	NA	NA	NA	NA	NA	NA	XBXT10g019654	25.674	28.735	X	X	.	.	NA	NA	NA	NA	NA	NA	NA	NA	NA	NA	NA
ap5m1	L	gene6640	32.484	38.608	.	.	.	.	NA	NA	NA	NA	NA	NA	NA	XBXT10g016143	62.001	71.111	X	X	.	.	ENSDARG00000031533	ap5m1	47.073	30.8	1.315	X	.	.	.	.	.
apaf1	L	gene5747	18.297	24.846	.	.	.	.	NA	NA	NA	NA	NA	NA	NA	XBXT10g005012	21.53	22.623	X	X	.	.	ENSDARG00000021239	apaf1	42.104	34.07	10.966	X	.	.	.	.	.
apba1	LS	gene5689	4.38	1.665	.	.	.	.	gene4998	3.271	3.01	.	.	.	.	XBXT10g005474	26.337	29.536	X	X	X	U	ENSDARG00000074328, ENSDARG00000103848	apba1b, apba1a	4.077	7.506	0.805	X	.	.	.	.	.
apba2	LS	gene12558	26.856	38.939	.	.	.	.	gene15618	24.228	30.442	.	.	.	.	XBXT10g017798	21.644	20.458	X	X	.	.	ENSDARG00000063314, ENSDARG00000060639	apba2a, apba2b	5.255	8.151	2.317	X	.	.	.	.	.
apba3	LS	gene6910	106.005	92.371	.	.	.	.	gene2455	17.759	21.071	.	.	.	.	XBXT10g017296	36.68	40.148	X	X	.	.	NA	NA	NA	NA	NA	NA	NA	NA	NA	NA	NA
apbb1ip	LS	gene503	0	0	.	.	.	.	gene2728	0.142	0.203	.	.	.	D	XBXT10g011665	0.675	0.639	X	.	.	.	ENSDARG00000016505	apbb1ip	0	0	0.217	.	.	.	.	.	.
apbb2	LS	gene41393	3.912	2.457	.	.	.	U	gene46215	4.099	5.435	.	.	.	.	XBXT10g012908	7.009	6.613	X	X	.	.	NA	NA	NA	NA	NA	NA	NA	NA	NA	NA	NA
apbb3	L	gene6501	0.016	0	.	.	.	.	NA	NA	NA	NA	NA	NA	NA	XBXT10g019205	0.108	0.038	X	.	X	U	NA	NA	NA	NA	NA	NA	NA	NA	NA	NA	NA
apc	LS	gene3528	46.064	49.345	.	.	.	.	gene14921	45.155	42.82	.	.	.	.	XBXT10g001518	39.696	55.427	X	X	.	.	ENSDARG00000058868	apc	84.338	58.177	23.333	X	.	.	X	.	.
apc2	L	gene48416	1.237	0.185	.	.	.	.	NA	NA	NA	NA	NA	NA	NA	XBXT10g018273	0.017	0.059	X	.	.	.	ENSDARG00000063007	apc2	2.413	1.244	0	X	.	.	.	.	.
apcdd1	LS	gene1844	46.857	58.29	X	X	U	D	gene46390	0.341	1.491	X	X	U	D	XBXT10g016745	0.282	0.472	X	.	X	U	NA	NA	NA	NA	NA	NA	NA	NA	NA	NA	NA
apcdd1l	S	NA	NA	NA	NA	NA	NA	NA	gene6860	0	0.031	.	.	.	.	XBXT10g014856	3.622	2.329	X	X	.	.	ENSDARG00000075557	apcdd1l	0	0.044	0	.	.	.	.	.	.
apcs	L	gene9261	0	0	.	.	.	.	NA	NA	NA	NA	NA	NA	NA	XBXT10g019212	0	0	X	.	.	.	ENSDARG00000045089	si:ch211-270n8.1	0	0	0	.	.	.	.	.	.
apeh	L	gene43571	0.691	0.181	.	.	.	.	NA	NA	NA	NA	NA	NA	NA	XBXT10g011906	15.769	16.462	X	X	.	.	ENSDARG00000008703	apeh	72.227	66.343	52.486	X	.	.	.	.	.
apex1	LS	gene14687	91.411	83.682	.	.	.	.	gene35416	29.01	27.006	.	.	.	.	XBXT10g006784	142.279	168.325	X	X	X	.	ENSDARG00000045843	apex1	61.824	46.348	84.708	X	.	.	X	.	.
apex2	L	gene14357	64.387	62.773	.	.	.	.	NA	NA	NA	NA	NA	NA	NA	XBXT10g006544	100.194	86.181	X	X	.	.	ENSDARG00000008472	apex2	75.586	35.089	0.735	X	.	.	.	.	.
aph1a	LS	gene772	33.346	21.692	.	.	.	.	gene10929	76.649	75.957	.	.	.	.	XBXT10g007670	36.726	27.655	X	X	.	.	NA	NA	NA	NA	NA	NA	NA	NA	NA	NA	NA
api5	LS	gene12657	130.064	131.567	X	.	U	.	gene14264	154.457	166.914	X	.	.	.	XBXT10g002293	105.409	131.815	X	X	X	.	ENSDARG00000033597	api5	358.891	508.246	663.658	X	.	X	X	.	.
apip	LS	gene12504	11.34	4.243	.	.	.	.	gene1363	47.618	19.739	.	.	.	.	XBXT10g018479	43.446	36.179	X	X	.	.	NA	NA	NA	NA	NA	NA	NA	NA	NA	NA	NA
aplf	L	gene12985	19.202	17.602	.	.	.	.	NA	NA	NA	NA	NA	NA	NA	XBXT10g005255	23.186	25.777	X	X	.	.	NA	NA	NA	NA	NA	NA	NA	NA	NA	NA	NA
apln	LS	gene9953	0.469	0.992	X	X	D	D	gene50296	0	0	.	.	.	.	XBXT10g005373	0.182	0.593	X	.	.	.	ENSDARG00000053279	apln	0	0	0	.	.	.	.	.	.
aplnr	LS	gene3001	0.099	5.964	X	X	U	D	gene8028	0.027	5.778	X	.	U	.	XBXT10g025247	0.327	29.855	X	X	X	D	NA	NA	NA	NA	NA	NA	NA	NA	NA	NA	NA
aplp1	LS	gene5172	0.052	0.037	.	.	.	.	gene49025	3.877	3.836	.	.	.	.	XBXT10g018316	0	0	X	.	.	.	ENSDARG00000098368	aplp1	0.184	0.026	0.055	.	.	.	.	.	.
aplp2	LS	gene14841	82.292	93.093	X	X	U	D	gene13029	46.211	60.038	X	X	.	D	XBXT10g009227	50.624	52.502	X	X	.	.	ENSDARG00000054864	aplp2	167.874	144.387	92.881	X	.	.	X	.	.
apmap	L	gene11777	10.667	8.547	.	.	.	.	NA	NA	NA	NA	NA	NA	NA	XBXT10g019473	57.036	72.147	X	X	.	.	ENSDARG00000017422	apmap	75.488	85.405	44.261	X	.	.	.	.	.
apoa1	LS	gene15166	0	0	.	.	.	.	gene1368	0	0	.	.	.	.	XBXT10g005885	0.189	0	X	.	.	.	ENSDARG00000012076, ENSDARG00000071306	apoa1a, gip	0	0.35	67.974	X	.	.	X	.	.
apoa4	LS	gene10861	0	0	.	.	.	.	gene8429	0	0.047	.	.	.	.	XBXT10g003717	0	0.203	X	.	.	.	ENSDARG00000040298	apoa4b.1	0	0.199	0	.	.	.	.	.	.
apoa5	LS	gene15907	0.037	0	.	.	.	.	gene39059	0	0	.	.	.	.	XBXT10g006184	0	0.038	X	.	.	.	NA	NA	NA	NA	NA	NA	NA	NA	NA	NA	NA
apob	LS	gene46369	0	0	.	.	.	.	gene20167	0.025	0	.	.	.	.	XBXT10g013588	0	0	X	.	.	.	ENSDARG00000022767, ENSDARG00000042780	apobb.1, apoba	0.224	0.414	3.195	X	.	.	X	.	.
apobec2	L	gene49316	0	0.123	.	.	.	.	NA	NA	NA	NA	NA	NA	NA	XBXT10g015750	0	0	X	.	.	.	NA	NA	NA	NA	NA	NA	NA	NA	NA	NA	NA
apobec4	S	NA	NA	NA	NA	NA	NA	NA	gene8689	0	0	.	.	.	.	XBXT10g004570	0	0.039	X	.	.	.	NA	NA	NA	NA	NA	NA	NA	NA	NA	NA	NA
apoc1	L	gene10720	0.053	0.155	.	.	.	.	NA	NA	NA	NA	NA	NA	NA	XBXT10g012114	0	6.663	.	X	NA	NA	ENSDARG00000092170	apoc1	1.529	12.424	1069.21	X	.	X	X	X	.
apoe	LS	gene18	0	0	.	.	.	.	gene722	0.206	0	.	.	.	.	XBXT10g018443	0	0.057	X	.	.	.	ENSDARG00000040295	apoeb	0	206.011	2874.01	X	X	X	X	X	X
apoh	L	gene11221	0	0	.	.	.	.	NA	NA	NA	NA	NA	NA	NA	XBXT10g015099	0.364	0.169	.	.	NA	NA	NA	NA	NA	NA	NA	NA	NA	NA	NA	NA	NA
apold1	LS	gene12793	0	1.539	X	.	D	.	gene38560	0.054	0	.	.	.	.	XBXT10g005338	0.268	0.15	X	.	.	.	NA	NA	NA	NA	NA	NA	NA	NA	NA	NA	NA
apom	L	gene4457	0	0	.	.	.	.	NA	NA	NA	NA	NA	NA	NA	XBXT10g008070	0.421	0.941	X	.	.	.	ENSDARG00000076838	apom	3.441	0.196	0	X	.	.	.	.	.
apoo	L	gene17075	60.828	40.942	.	.	.	.	NA	NA	NA	NA	NA	NA	NA	XBXT10g016499	93.711	38.948	X	X	.	.	ENSDARG00000026444, ENSDARG00000104696	apoob, apooa	14.424	25.214	15.872	X	.	.	.	.	.
apool	L	gene46440	79.088	47.123	.	.	.	.	NA	NA	NA	NA	NA	NA	NA	XBXT10g011967	54.657	24.541	X	X	.	.	ENSDARG00000039374	apool	10.539	5.039	1.213	X	.	.	.	.	.
apov1.1	S	NA	NA	NA	NA	NA	NA	NA	gene46019	0	0.053	.	.	.	.	XBXT10g002476	0	0	.	.	NA	NA	NA	NA	NA	NA	NA	NA	NA	NA	NA	NA	NA
apov1.2	L	gene45737	0	0	.	.	.	.	NA	NA	NA	NA	NA	NA	NA	XBXT10g002701	0.106	0.593	.	.	NA	NA	NA	NA	NA	NA	NA	NA	NA	NA	NA	NA	NA
app	LS	gene12380	24.689	24.112	.	.	.	.	gene40686	27.051	28.778	.	.	.	.	XBXT10g010399	7.843	8.636	X	X	.	.	ENSDARG00000055543, ENSDARG00000104279	appb, appa	8.515	14.717	26.66	X	.	X	X	.	.
appbp2	LS	gene7680	10.334	6.056	.	.	.	.	gene14075	51.314	26.224	.	.	.	.	XBXT10g007022	34.726	22.278	X	X	.	.	ENSDARG00000007566	appbp2	107.948	108.527	51.148	X	.	X	X	.	.
appl1	LS	gene6725	49.445	45.538	.	.	.	.	gene1970	21.912	12.992	.	.	.	.	XBXT10g012125	51.665	37.964	X	X	.	.	NA	NA	NA	NA	NA	NA	NA	NA	NA	NA	NA
appl2	L	gene8141	52.716	57.657	.	.	.	.	NA	NA	NA	NA	NA	NA	NA	XBXT10g017625	26.962	31.087	X	X	X	.	ENSDARG00000078139, ENSDARG00000100151	appl2, appl2	38.967	50.486	10.691	X	.	.	X	.	.
aprt	L	gene11937	12.803	11.651	.	.	.	.	NA	NA	NA	NA	NA	NA	NA	XBXT10g012696	12.396	14.043	X	X	X	D	ENSDARG00000003519	aprt	27.947	21.784	11.164	X	.	.	.	.	.
aptx	L	gene18206	68.429	70.796	.	.	.	.	NA	NA	NA	NA	NA	NA	NA	XBXT10g003239	68.506	60.106	X	X	.	.	ENSDARG00000027143	aptx	12.813	6.297	11.558	X	.	.	.	.	.
aqp1	LS	gene1366	0	4.021	.	.	.	.	gene10637	0.021	0	.	.	.	.	XBXT10g020007	0	0	X	.	.	.	NA	NA	NA	NA	NA	NA	NA	NA	NA	NA	NA
aqp10	L	gene18222	0	1.037	.	.	.	.	NA	NA	NA	NA	NA	NA	NA	XBXT10g012548	0.049	0.069	X	.	.	.	ENSDARG00000058678, ENSDARG00000007086	aqp10b, aqp10a	0.392	0.335	0.932	.	.	.	.	.	.
aqp11	L	gene14070	16.657	14.977	X	X	.	.	NA	NA	NA	NA	NA	NA	NA	XBXT10g007611	51.72	47.593	X	X	.	.	ENSDARG00000100555	aqp11	0.507	0.096	1.607	X	.	.	.	.	.
aqp12a	S	NA	NA	NA	NA	NA	NA	NA	gene9668	0.286	0.278	.	.	.	.	XBXT10g007797	0.056	0	X	.	.	.	NA	NA	NA	NA	NA	NA	NA	NA	NA	NA	NA
aqp2	LS	gene12535	0	0	.	.	.	.	gene4995	0	0	.	.	.	.	XBXT10g012307	0	0	X	.	.	.	NA	NA	NA	NA	NA	NA	NA	NA	NA	NA	NA
aqp3	LS	gene48317	0.198	0.528	.	.	.	.	gene13031	0.2	0.183	.	.	.	.	XBXT10g012326	3.113	4.227	X	X	.	.	ENSDARG00000003808, ENSDARG00000069518	aqp3a, aqp3b	0.663	3.591	40.404	X	.	.	X	.	.
aqp4	LS	gene3823	0	0	.	.	.	D	gene42732	0	0	.	.	.	.	XBXT10g012373	0.327	0.406	X	.	.	.	ENSDARG00000010565	aqp4	0	0.101	0	.	.	.	.	.	.
aqp5	LS	gene20181	0	0	.	.	.	.	gene5513	0	0	.	.	.	.	XBXT10g007968	0	0	X	.	.	.	NA	NA	NA	NA	NA	NA	NA	NA	NA	NA	NA
aqp7	LS	gene36286	0.06	0	.	.	.	.	gene44559	0.178	0	.	.	.	.	XBXT10g003298	0.121	0	X	.	.	.	ENSDARG00000026787	aqp7	1.946	3.259	1.302	X	.	.	.	.	.
aqp8	L	gene9161	0	0	.	.	.	.	NA	NA	NA	NA	NA	NA	NA	XBXT10g016951	0	0	X	.	.	.	ENSDARG00000045141	aqp8a.1	0	1.327	1.384	X	.	.	.	.	.
aqp9	L	gene8364	0.415	0.168	.	.	.	.	NA	NA	NA	NA	NA	NA	NA	XBXT10g010210	0	0	X	.	.	.	ENSDARG00000053480	aqp9b	0	0	0.557	.	.	.	.	.	.
aqr	L	gene42408	136.207	126.49	X	.	.	.	NA	NA	NA	NA	NA	NA	NA	XBXT10g011893	115.446	104.194	X	X	.	.	ENSDARG00000016775	aqr	26.826	19.286	36.879	X	.	.	X	.	.
ar	L	gene4933	0.082	1.701	X	.	.	D	NA	NA	NA	NA	NA	NA	NA	XBXT10g008262	0.116	0.191	X	.	.	.	ENSDARG00000067976	ar	0.377	0.591	1.12	X	.	.	.	.	.
araf	LS	gene4952	28.258	18.622	.	.	.	.	gene10178	45.799	31.877	.	.	.	.	XBXT10g007226	26.094	22.446	X	X	.	.	ENSDARG00000054533	araf	2.187	4.965	18.947	X	.	.	X	.	.
arap2	S	NA	NA	NA	NA	NA	NA	NA	gene16733	0.138	0.189	.	.	.	.	XBXT10g008446	0.309	0.47	X	.	.	.	NA	NA	NA	NA	NA	NA	NA	NA	NA	NA	NA
arc	L	gene44016	0	0	.	.	.	.	NA	NA	NA	NA	NA	NA	NA	XBXT10g009394	0	0	X	.	.	.	NA	NA	NA	NA	NA	NA	NA	NA	NA	NA	NA
arcn1	LS	gene18790	81.84	86.119	.	.	.	.	gene40921	13.347	19.451	.	.	.	.	XBXT10g014232	180.352	204.822	X	X	.	.	ENSDARG00000031214, ENSDARG00000002792	arcn1b, arcn1a	444.481	478.335	217.471	X	.	.	.	.	.
areg	LS	gene38828	0.197	0.092	.	.	.	.	gene6761	0	0.174	.	.	.	.	XBXT10g009158	0	0	.	.	NA	NA	ENSDARG00000076853	areg	0.309	0.551	0.092	.	.	.	.	.	.
arel1	L	gene16358	36.721	43.664	X	.	.	.	NA	NA	NA	NA	NA	NA	NA	XBXT10g018898	72.119	74.042	X	X	X	U	NA	NA	NA	NA	NA	NA	NA	NA	NA	NA	NA
arf1	LS	gene9642	167.145	169.14	X	X	.	D	gene10022	69.961	81.265	X	X	U	.	XBXT10g016814	499.262	624.83	X	X	X	D	ENSDARG00000009484	arf1	79.111	93.356	156.972	X	X	X	X	.	.
arf3	LS	gene11588	2.884	2.586	.	.	.	.	gene14968	59.384	46.839	.	.	.	.	XBXT10g003511	34.17	40.218	X	X	.	.	ENSDARG00000036998, ENSDARG00000070539	arf3b, arf3a	0	0.529	0	.	.	.	.	.	.
arf4	LS	gene34321	170.441	166.792	X	X	U	D	gene19999	77.676	79.717	X	X	U	D	XBXT10g003606	45.701	46.993	X	X	X	U	ENSDARG00000045989, ENSDARG00000100339, ENSDARG00000103858	arf4a, arf4b, arf4a	5.065	16.312	27.396	X	.	.	.	.	.
arf5	LS	gene5175	181.214	201.554	X	.	.	.	gene19435	100.565	91.4	X	.	U	.	XBXT10g016082	280.334	319.166	X	X	X	U	ENSDARG00000070472	arf5	382.981	464.917	397.673	X	.	.	X	.	.
arf6	LS	gene13631	38.956	35.1	.	.	.	.	gene44666	130.142	149.461	.	.	.	.	XBXT10g014693	218.658	244.817	X	X	X	U	ENSDARG00000101626, ENSDARG00000052928	arf6a, arf6b	224.517	203.474	135.77	X	.	.	.	.	.
arf6.2	LS	gene5726	48.863	40.963	.	.	.	.	gene13452	27.872	23.094	.	.	.	.	XBXT10g013984	30.231	26.435	X	X	.	.	ENSDARG00000101626	arf6a	158.486	103.011	29.847	X	.	.	.	.	.
arfgap1	LS	gene11732	77.228	73.934	.	.	.	.	gene14627	74.876	59.549	.	.	.	.	XBXT10g011112	120.223	125.97	X	X	.	.	ENSDARG00000101616	arfgap1	121.361	110.3	44.078	X	.	.	.	.	.
arfgap2	LS	gene12025	103.488	102.532	X	.	.	.	gene5540	40.243	38.744	.	.	.	.	XBXT10g002152	55.989	63.678	X	X	X	U	ENSDARG00000067601	arfgap2	303.489	268.749	144.494	X	.	X	X	.	.
arfgap3	LS	gene16500	14.274	18.644	.	.	.	.	gene15138	28.948	20.942	.	.	.	.	XBXT10g004391	9.407	7.972	X	X	.	.	ENSDARG00000097583	arfgap3	122.089	81.766	17.841	X	.	.	.	.	.
arfip1	LS	gene39371	69.164	79.386	.	.	.	.	gene14832	39.997	52.213	.	.	.	.	XBXT10g004097	58.459	71.402	X	X	.	.	ENSDARG00000070055	arfip1	94.128	94.08	17.728	X	.	.	X	.	.
arfrp1	LS	gene9221	23.437	14.23	.	.	.	.	gene44410	25.196	19.475	.	.	.	.	XBXT10g009234	99.97	63.58	.	X	NA	NA	ENSDARG00000057857	arfrp1	14.49	8.563	4.833	X	.	.	.	.	.
arg1	L	gene14916	0.117	5.568	X	X	D	.	NA	NA	NA	NA	NA	NA	NA	XBXT10g016056	0.037	0.052	X	.	.	.	ENSDARG00000057429	arg1	0	0	0	.	.	.	.	.	.
arg2	LS	gene12258	0.434	0.506	.	.	.	.	gene19574	1.632	2.972	X	X	U	.	XBXT10g003328	0.455	0.381	X	.	.	.	ENSDARG00000039269	arg2	1.061	8.922	31.699	X	.	X	X	.	.
arglu1	LS	gene7887	37.516	47.108	X	X	U	.	gene13910	29.308	36.88	X	.	U	D	XBXT10g016433	138.637	156.554	X	X	X	U	ENSDARG00000018319, ENSDARG00000019223	arglu1b, arglu1a	252.507	353.399	260.224	X	.	X	X	.	.
arhgap1	LS	gene1128	22.448	16.84	.	.	.	.	gene8517	30.996	27.343	.	.	.	.	XBXT10g005543	15.03	16.028	X	X	.	.	ENSDARG00000024324	arhgap1	108.329	54.753	14.129	X	.	X	X	.	.
arhgap10	LS	gene11223	26.907	33.22	.	.	.	.	gene18697	21.671	28.033	.	.	.	.	XBXT10g012031	37.295	43.901	X	X	.	.	ENSDARG00000078326	arhgap10	101.574	64.573	4.885	X	.	.	X	.	.
arhgap11a.1	L	gene48082	165.901	170.733	X	X	.	.	NA	NA	NA	NA	NA	NA	NA	XBXT10g001851	169.385	203.754	X	X	.	.	ENSDARG00000100019	arhgap11a	158.884	148.646	215.18	X	X	X	X	.	.
arhgap11a.2	LS	gene13510	82.727	50.066	.	.	D	.	gene18060	76.107	40.161	.	.	.	.	XBXT10g000684	162.37	92.307	X	X	.	.	ENSDARG00000100019	arhgap11a	158.884	148.646	215.18	X	X	X	X	.	.
arhgap12	LS	gene13820	25.893	25.768	.	.	.	.	gene9644	17.34	13.549	.	.	.	.	XBXT10g016997	27.122	27.417	X	X	X	U	ENSDARG00000008548, ENSDARG00000026482	arhgap12a, arhgap12b	39.753	24.154	10.255	X	.	.	X	.	.
arhgap17	LS	gene36461	44.128	34.05	.	.	.	.	gene13699	24.616	24.618	X	X	U	D	XBXT10g005866	6.664	7.277	X	X	.	.	NA	NA	NA	NA	NA	NA	NA	NA	NA	NA	NA
arhgap18	L	gene37013	46.657	44.898	.	.	.	.	NA	NA	NA	NA	NA	NA	NA	XBXT10g014833	56.333	56.218	X	X	.	.	NA	NA	NA	NA	NA	NA	NA	NA	NA	NA	NA
arhgap19	L	gene3759	76.465	67.215	.	.	.	.	NA	NA	NA	NA	NA	NA	NA	XBXT10g019079	69.124	72.496	X	X	.	.	ENSDARG00000083189	arhgap19	129.26	108.338	45.597	X	.	.	X	.	.
arhgap20	LS	gene6936	46.197	52.393	.	.	.	.	gene372	15.771	18.858	.	.	.	.	XBXT10g005733	20.724	19.224	X	X	.	.	ENSDARG00000089326	arhgap20	3.005	0.857	0.315	X	.	.	.	.	.
arhgap21	LS	gene37966	140.146	127.714	.	.	.	.	gene14265	81.132	80.457	.	.	.	.	XBXT10g018319	15.353	20.032	X	X	.	.	NA	NA	NA	NA	NA	NA	NA	NA	NA	NA	NA
arhgap22	L	gene3089	0.221	0.114	.	.	.	.	NA	NA	NA	NA	NA	NA	NA	XBXT10g012465	4.049	3.992	X	X	X	U	ENSDARG00000021255	arhgap22	0	0	0	.	.	.	.	.	.
arhgap23	LS	gene40136	9.271	11.275	.	.	.	.	gene19167	5.688	1.676	.	.	.	D	XBXT10g015746	2.536	2.691	X	X	.	.	ENSDARG00000052950, ENSDARG00000026840	arhgap23a, arhgap23b	1.679	1.136	0.958	X	.	.	.	.	.
arhgap24	L	gene41930	0.028	0	.	.	.	.	NA	NA	NA	NA	NA	NA	NA	XBXT10g002208	0.754	0.574	X	.	.	.	NA	NA	NA	NA	NA	NA	NA	NA	NA	NA	NA
arhgap25	LS	gene40599	0.019	0	.	.	.	U	gene7936	0.014	0.247	.	.	.	.	XBXT10g018724	0.102	0.072	X	.	.	.	ENSDARG00000061784	arhgap25	0	0.379	0.197	.	.	.	.	.	.
arhgap26	LS	gene4671	13.482	13.285	.	.	.	.	gene35751	25.441	19.879	.	.	.	.	XBXT10g010262	27.022	33.04	X	X	.	.	NA	NA	NA	NA	NA	NA	NA	NA	NA	NA	NA
arhgap27	LS	gene49533	2.401	10.132	X	.	D	.	gene36188	2.527	2.455	.	.	.	.	XBXT10g008205	0.539	0.855	X	.	X	D	ENSDARG00000104255	arhgap27	0	0.155	0.566	.	.	.	.	.	.
arhgap28	LS	gene41960	5.597	3.994	.	.	.	.	gene13118	0.013	0.074	.	.	.	.	XBXT10g010870	0.05	0.056	X	.	.	.	ENSDARG00000101350	arhgap28	76.416	81.652	5.416	X	.	.	.	.	.
arhgap29	LS	gene13595	52.414	50.233	X	X	U	D	gene13563	52.36	39.875	X	X	U	D	XBXT10g010546	188.874	165.256	X	X	.	.	ENSDARG00000026329, ENSDARG00000017748	arhgap29a, arhgap29b	16.15	9.066	1.944	X	.	.	X	.	.
arhgap30	LS	gene2629	0	0.083	.	.	.	.	gene7603	0	0.028	.	.	.	.	XBXT10g000421	0	0.043	X	.	.	.	NA	NA	NA	NA	NA	NA	NA	NA	NA	NA	NA
arhgap31	LS	gene5524	3.169	6.121	.	.	.	.	gene48038	0.203	0.214	.	.	.	.	XBXT10g006160	3.657	3.752	X	X	.	.	ENSDARG00000059472	arhgap31	0.137	0.156	0	.	.	.	.	.	.
arhgap32	LS	gene15005	64.779	54.7	.	.	.	.	gene43097	41.084	28.998	.	.	.	.	XBXT10g017345	4.915	7.632	X	X	X	D	NA	NA	NA	NA	NA	NA	NA	NA	NA	NA	NA
arhgap33	LS	gene43236	1.493	1.754	.	.	.	.	gene38869	30.847	23.049	.	.	.	.	XBXT10g004751	2.929	2.783	X	X	.	.	ENSDARG00000011333	arhgap33	20.656	11.583	4.027	X	.	.	X	.	.
arhgap35	LS	gene37869	33.62	29.118	.	.	.	.	gene18945	62.337	58.911	X	.	.	.	XBXT10g005389	14.026	18.462	X	X	.	.	ENSDARG00000060297, ENSDARG00000062577	arhgap35b, arhgap35a	73.62	45.099	19.225	X	.	.	X	.	.
arhgap36	L	gene8180	0.021	0.092	.	.	.	.	NA	NA	NA	NA	NA	NA	NA	XBXT10g001799	6.832	8.333	.	X	NA	NA	ENSDARG00000059672	arhgap36	5.387	8.423	4.667	X	.	.	X	.	.
arhgap4	LS	gene35712	0	0.85	X	.	U	.	gene49259	0.011	0.381	.	.	.	.	XBXT10g008405	0.242	0.395	X	.	X	D	NA	NA	NA	NA	NA	NA	NA	NA	NA	NA	NA
arhgap40	LS	gene11424	0.859	0.209	.	.	.	.	gene2319	36.809	28.313	.	.	.	.	XBXT10g009938	44.89	30.738	X	X	.	.	NA	NA	NA	NA	NA	NA	NA	NA	NA	NA	NA
arhgap42	S	NA	NA	NA	NA	NA	NA	NA	gene13744	3.508	4.939	.	.	.	D	XBXT10g004179	3.729	1.454	X	X	.	.	NA	NA	NA	NA	NA	NA	NA	NA	NA	NA	NA
arhgap44	LS	gene11640	0.048	0.124	.	.	.	.	gene49584	1.141	3.795	.	.	.	.	XBXT10g011555	1.346	1.761	X	X	.	.	NA	NA	NA	NA	NA	NA	NA	NA	NA	NA	NA
arhgap45	LS	gene48835	0.861	1.28	.	.	.	.	gene9637	6.83	5.243	.	.	.	D	XBXT10g009773	50.154	55.647	X	X	X	D	ENSDARG00000095174, ENSDARG00000062049, ENSDARG00000052496	arhgap45b, arhgap45b, arhgap45a	59.197	38.831	8.979	X	.	.	.	.	.
arhgap5	LS	gene3241	22.926	17.483	X	X	U	D	gene13535	53.95	43.46	X	X	.	D	XBXT10g002859	45.576	50.594	X	X	X	U	ENSDARG00000061294	arhgap5	7.036	6.929	19.585	X	.	.	X	.	.
arhgap8	L	gene46939	15.21	33.331	.	.	.	U	NA	NA	NA	NA	NA	NA	NA	XBXT10g004100	33.186	36.72	X	X	.	.	NA	NA	NA	NA	NA	NA	NA	NA	NA	NA	NA
arhgap9	LS	gene47324	0.016	0	.	.	.	.	gene1902	0.337	0.538	.	.	.	U	XBXT10g007248	0.089	0.156	X	.	.	.	NA	NA	NA	NA	NA	NA	NA	NA	NA	NA	NA
arhgdia	L	gene17447	38.301	42.012	X	X	U	.	NA	NA	NA	NA	NA	NA	NA	XBXT10g008173	22.743	26.299	X	X	.	.	ENSDARG00000043795	arhgdia	64.164	30.459	26.834	X	.	.	X	.	.
arhgdib	LS	gene9398	0	0	.	.	.	.	gene15000	0	0	.	.	.	.	XBXT10g008971	0	0.104	X	.	.	.	NA	NA	NA	NA	NA	NA	NA	NA	NA	NA	NA
arhgdig	LS	gene19451	63.692	49.251	.	.	.	.	gene47123	129.431	106.202	X	X	U	D	XBXT10g014845	138.181	109.397	X	X	X	U	ENSDARG00000004034	arhgdig	45.325	33.42	21.749	X	.	.	.	.	.
arhgef1	LS	gene45311	42.116	38.847	.	.	.	.	gene48125	35.809	26.984	X	.	U	D	XBXT10g001600	43.482	43.253	X	X	.	.	ENSDARG00000055837, ENSDARG00000040380	arhgef1b, arhgef1a	106.729	108.629	32.462	X	.	.	X	.	.
arhgef10	LS	gene16144	54.025	51.489	.	.	.	.	gene1688	4.189	10.875	.	.	.	.	XBXT10g005219	39.445	37.461	X	X	.	.	ENSDARG00000077788	arhgef10	21.531	16.026	2.578	X	.	.	.	.	.
arhgef10l	L	gene18076	15.752	5.215	.	.	.	D	NA	NA	NA	NA	NA	NA	NA	XBXT10g007225	11.96	7.715	X	X	.	.	NA	NA	NA	NA	NA	NA	NA	NA	NA	NA	NA
arhgef11	LS	gene13285	63.501	46.045	.	.	.	.	gene17954	56.306	43.76	.	.	.	.	XBXT10g019383	44.849	39.115	X	X	.	.	ENSDARG00000052482	arhgef11	60.414	43.395	16.893	X	.	.	X	.	.
arhgef12	LS	gene39679	62.219	58.905	.	.	.	.	gene38661	83.751	79.089	.	.	.	.	XBXT10g007469	104.822	111.952	X	X	.	.	ENSDARG00000030532	arhgef12a	44.275	35.465	10.606	X	.	.	X	.	.
arhgef16	LS	gene2157	28.087	29.837	.	.	.	.	gene3509	2.068	2.809	.	.	.	.	XBXT10g002984	106.987	106.543	X	X	.	.	ENSDARG00000077114	arhgef16	31.944	34.451	16.735	X	.	.	X	.	.
arhgef17	L	gene356	42.012	35.438	.	.	.	.	NA	NA	NA	NA	NA	NA	NA	XBXT10g014403	6.83	7.525	X	X	.	.	NA	NA	NA	NA	NA	NA	NA	NA	NA	NA	NA
arhgef2	LS	gene16468	47.86	28.514	.	.	.	.	gene46092	10.277	10.395	.	.	.	.	XBXT10g007765	37.999	35.322	X	X	.	.	ENSDARG00000075819	arhgef2	0.135	0.614	23.933	X	.	.	X	.	.
arhgef25	LS	gene18835	0.057	0.031	.	.	.	.	gene19760	0.332	0.388	.	.	.	.	XBXT10g003504	0.837	1.01	X	X	.	.	NA	NA	NA	NA	NA	NA	NA	NA	NA	NA	NA
arhgef26	LS	gene5267	0.874	0.675	.	.	.	.	gene41184	0.379	0.261	.	.	.	D	XBXT10g013665	21.215	28.672	X	X	.	.	NA	NA	NA	NA	NA	NA	NA	NA	NA	NA	NA
arhgef28	LS	gene5649	0.029	0.042	.	.	.	.	gene17982	0.154	0.146	.	.	.	.	XBXT10g015619	0.187	0.499	X	.	.	.	ENSDARG00000060415	arhgef28a	50.218	18.884	2.053	X	.	.	.	.	.
arhgef3.1	S	NA	NA	NA	NA	NA	NA	NA	gene15851	1.328	1.687	.	.	U	.	XBXT10g013831	1.682	2.02	X	X	.	.	NA	NA	NA	NA	NA	NA	NA	NA	NA	NA	NA
arhgef3.2	LS	gene4401	1.428	1.344	.	.	.	.	gene46698	0.02	0.252	X	X	U	D	XBXT10g008210	6.856	5.426	X	X	.	.	NA	NA	NA	NA	NA	NA	NA	NA	NA	NA	NA
arhgef33	LS	gene8242	0.814	2.529	.	.	.	.	gene47394	0.058	0.084	.	.	.	.	XBXT10g018614	0.185	0.516	X	.	.	.	ENSDARG00000097964	arhgef33	0	0.312	0.26	.	.	.	.	.	.
arhgef37	LS	gene14448	1.495	1.461	.	.	.	.	gene1459	0.287	0.73	.	.	.	D	XBXT10g019728	12.795	13.379	X	X	.	.	ENSDARG00000002463	arhgef37	21.124	25.506	27.569	X	.	.	X	.	.
arhgef38	LS	gene49791	15.882	14.648	.	.	.	.	gene37500	0.031	0.135	.	.	.	.	XBXT10g010995	0.035	0.221	X	.	.	.	ENSDARG00000079377	arhgef38	1.516	0.123	0	X	.	.	.	.	.
arhgef39	L	gene20094	40.15	54.058	X	.	U	.	NA	NA	NA	NA	NA	NA	NA	XBXT10g013832	15.715	3.714	X	X	.	.	ENSDARG00000013476	arhgef39	54.283	57.311	37.056	X	.	.	.	.	.
arhgef4	LS	gene17705	0.015	0.01	.	.	.	.	gene40696	0.059	0.025	.	.	.	.	XBXT10g004476	0.311	0.392	X	.	.	.	ENSDARG00000012914	arhgef4	4.413	2.516	1.819	X	.	.	X	.	.
arhgef40	LS	gene17155	5.451	4.579	.	.	.	.	gene5965	0	0.322	.	.	.	.	XBXT10g017430	0	2.958	X	X	X	D	ENSDARG00000078979	arhgef40	2.475	1.129	0.118	X	.	.	.	.	.
arhgef6	LS	gene40195	1.575	3.579	.	.	.	.	gene50431	0.018	0.054	.	.	.	.	XBXT10g018420	9.677	12.588	X	X	.	.	ENSDARG00000006683	arhgef6	17.896	21.078	12.197	X	X	X	X	.	.
arhgef7	LS	gene45062	31.359	37.07	.	.	.	.	gene48565	36.19	38.511	.	.	.	.	XBXT10g001345	38.945	32.705	X	X	.	.	ENSDARG00000006299, ENSDARG00000073848	arhgef7a, arhgef7b	94.115	49.268	24.774	X	.	.	X	.	.
arid1b	LS	gene44544	17.822	15.026	.	.	.	.	gene41415	3.135	2.178	.	.	.	D	XBXT10g013777	3.841	3.95	X	X	.	.	ENSDARG00000092503	arid1b	4.639	2.415	0.48	X	.	.	.	.	.
arid2	LS	gene14899	66.837	72.999	X	X	U	.	gene1927	79.047	83.057	X	X	U	D	XBXT10g011165	11.952	22.427	X	X	X	U	ENSDARG00000007413	arid2	40.682	25.935	16.602	X	.	.	X	.	.
arid3a	LS	gene5929	44.688	36.836	.	.	.	.	gene16083	36.769	39.868	.	.	.	.	XBXT10g006971	72.871	75.078	X	X	.	.	NA	NA	NA	NA	NA	NA	NA	NA	NA	NA	NA
arid3b	LS	gene45696	57.75	53.005	X	X	U	U	gene37318	95.297	111.686	X	X	U	.	XBXT10g011147	70.328	102.005	X	X	X	U	ENSDARG00000104034	arid3b	99.902	79.111	121.765	X	.	X	X	.	X
arid4a	LS	gene37367	104.57	62.39	X	X	U	D	gene35547	69.408	57.818	X	X	U	D	XBXT10g000905	105.189	89.366	X	X	X	U	ENSDARG00000043873	arid4a	47.332	23.541	27.612	X	X	X	X	.	.
arid4b	LS	gene14749	35.622	18.313	.	.	.	.	gene37228	8.146	12.474	.	.	.	.	XBXT10g015355	57.831	47.073	X	X	.	.	ENSDARG00000090656, ENSDARG00000103163	tomm20a, tomm20a	57.651	43.899	17.256	X	.	.	.	.	.
arid5b	S	NA	NA	NA	NA	NA	NA	NA	gene333	37.464	30.465	.	.	.	.	XBXT10g012061	28.385	23.116	X	X	.	.	ENSDARG00000069988	arid6	0	0.154	0.161	.	.	.	.	.	.
arih1	LS	gene1793	38.032	29.55	.	.	.	.	gene7190	28.136	27.819	.	.	.	.	XBXT10g007371	48.123	36.084	X	X	.	.	ENSDARG00000003616	arih1	127.975	84.358	52.9	X	X	X	X	.	.
arih2	LS	gene18443	61.459	58.566	.	.	.	.	gene13258	68.134	61.921	.	.	.	.	XBXT10g008455	43.285	42.731	X	X	.	.	ENSDARG00000012848	arih2	100.28	92.174	75.234	X	.	.	X	.	.
arl1	LS	gene10278	41.325	33.783	X	.	D	.	gene17191	35.533	44.54	.	.	.	.	XBXT10g003715	153.638	148.709	X	X	X	.	ENSDARG00000101680	arl1	21.087	21.736	43.508	X	.	.	X	.	.
arl10	LS	gene17856	13.837	24.579	.	.	.	.	gene40910	0	0	.	.	.	.	XBXT10g008390	3.285	2.381	X	X	.	.	NA	NA	NA	NA	NA	NA	NA	NA	NA	NA	NA
arl10b	L	gene6555	75.672	90.41	.	.	D	.	NA	NA	NA	NA	NA	NA	NA	XBXT10g002518	87.123	108.553	X	X	.	.	NA	NA	NA	NA	NA	NA	NA	NA	NA	NA	NA
arl11	LS	gene17074	0	0	.	.	.	.	gene16772	0	0	.	.	.	.	XBXT10g005353	0.397	0.246	X	.	.	.	ENSDARG00000036637	arl11	0	0	0.558	.	.	.	.	.	.
arl11l.1	LS	gene39811	0.098	0	.	.	.	.	gene1534	0.423	0.669	.	.	.	.	XBXT10g004926	0	0	X	.	.	.	ENSDARG00000036637	arl11	0	0	0.558	.	.	.	.	.	.
arl13a	L	gene19325	0.615	1.109	.	.	D	.	NA	NA	NA	NA	NA	NA	NA	XBXT10g000603	7.828	8.241	X	X	.	.	ENSDARG00000052575	arl13a	59.537	14.315	49.343	X	.	X	.	.	X
arl13b	LS	gene5395	14.921	26.941	X	X	D	D	gene37604	1.642	3.545	.	.	.	.	XBXT10g018685	25.715	28.974	X	X	X	D	ENSDARG00000012763	arl13b	1.927	1.099	18.81	X	.	.	X	.	.
arl14	LS	gene35064	0	0	.	.	.	.	gene741	0	0	.	.	.	.	XBXT10g007635	0.08	0.056	X	.	.	.	NA	NA	NA	NA	NA	NA	NA	NA	NA	NA	NA
arl14ep	LS	gene41412	46.837	56.489	.	.	.	.	gene11705	12.896	9.732	.	.	.	.	XBXT10g006141	126.884	102.185	X	X	.	.	ENSDARG00000001210	arl14ep	231.523	138.471	100.521	X	.	.	X	.	.
arl14epl	LS	gene18768	0.25	0.078	.	.	.	.	gene19060	0.129	0.487	.	.	.	.	XBXT10g018480	0	0.351	X	.	.	.	NA	NA	NA	NA	NA	NA	NA	NA	NA	NA	NA
arl15	LS	gene17238	27.694	27.52	.	.	.	.	gene37594	30.832	20.567	.	.	.	.	XBXT10g006626	18.85	20.887	X	X	.	.	ENSDARG00000057995	arl15b	18.89	28.996	6.624	X	.	.	.	.	.
arl16	L	gene45220	11.809	1.658	.	.	.	.	NA	NA	NA	NA	NA	NA	NA	XBXT10g015354	40.454	43.45	.	X	NA	NA	ENSDARG00000059498	arl16	2.548	1.452	11.035	X	.	.	.	.	.
arl2	L	gene742	55.912	50.259	.	.	.	.	NA	NA	NA	NA	NA	NA	NA	XBXT10g017687	138.392	78.704	X	X	.	.	ENSDARG00000069496	arl2	58.579	41.58	6.617	X	.	.	.	.	.
arl2bp	L	gene12208	111.917	119.53	.	.	.	.	NA	NA	NA	NA	NA	NA	NA	XBXT10g002933	202.367	202.963	X	X	X	.	ENSDARG00000025383	arl2bp	97.141	46.843	18.828	X	.	.	.	.	.
arl3	LS	gene40405	18.523	14.622	.	.	.	.	gene5742	30.211	9.254	.	.	D	.	XBXT10g008736	42.761	22.774	X	X	.	.	ENSDARG00000056794	arl3a	1.114	5.874	5.629	X	.	.	.	.	.
arl4a	LS	gene15233	272.103	189.206	X	X	.	D	gene18662	94.858	44.851	X	X	U	D	XBXT10g015359	61.484	66.12	X	X	X	.	ENSDARG00000099918, ENSDARG00000033182	arl4aa, arl4ab	168.152	98.83	40.838	X	X	X	X	.	X
arl4c	LS	gene15954	4.833	0.67	.	.	.	.	gene21537	0	0.07	.	.	.	.	XBXT10g010180	0.298	5.856	X	X	.	.	NA	NA	NA	NA	NA	NA	NA	NA	NA	NA	NA
arl5a	S	NA	NA	NA	NA	NA	NA	NA	gene4657	44.993	44.996	.	.	.	.	XBXT10g006488	9.542	5.507	X	X	.	.	ENSDARG00000018627	arl5a	122.355	84.043	22.549	X	.	.	X	.	.
arl5b	S	NA	NA	NA	NA	NA	NA	NA	gene5198	49.21	44.438	X	.	.	.	XBXT10g007068	15.733	19.825	.	X	NA	NA	ENSDARG00000094709	arl8	145.096	214.811	115.562	X	X	X	X	.	.
arl5c	LS	gene15843	87.589	117.961	X	X	D	D	gene45471	50.387	95.133	X	X	D	D	XBXT10g015953	236.872	290.093	X	X	X	D	ENSDARG00000035719	arl5c	71.907	91.128	139.252	X	X	X	X	.	.
arl6	LS	gene45105	54.869	41.578	.	.	.	.	gene38178	29.823	27.053	.	.	.	.	XBXT10g004626	125.779	114.916	X	X	.	.	ENSDARG00000032056	arl6	13.248	11.795	11.437	X	.	.	.	.	.
arl6ip1	LS	gene7834	21.802	5.291	.	.	.	.	gene3316	42.102	17.723	.	.	D	.	XBXT10g015617	163.055	54.676	X	X	.	.	ENSDARG00000054578	arl6ip1	350.856	123.824	60.444	X	.	X	X	.	.
arl6ip4	L	gene9571	45.218	31.229	.	.	.	.	NA	NA	NA	NA	NA	NA	NA	XBXT10g003080	8.174	12.123	X	X	.	.	ENSDARG00000105036	arl6ip4	91.35	122.994	60.143	X	.	.	.	.	.
arl6ip5	LS	gene1500	23.724	24.406	.	.	.	.	gene14556	13.071	31.279	.	.	.	U	XBXT10g008042	9.6	9.582	.	X	NA	NA	ENSDARG00000016238, ENSDARG00000077044	arl6ip5b, arl6ip5a	73.896	103.883	243.957	X	.	.	X	.	.
arl6ip6	LS	gene12786	21.966	20.933	.	.	.	.	gene4104	32.903	41.083	.	.	.	.	XBXT10g003617	270.125	285.285	X	X	.	.	ENSDARG00000071013	arl6ip6	20.557	18.391	10.154	X	.	.	.	.	.
arl8b	LS	gene6714	28.957	26.355	.	.	U	.	gene9793	37.927	27.957	.	.	.	.	XBXT10g018388	8.753	6.096	X	X	.	.	ENSDARG00000070318, ENSDARG00000006915	arl8bb, arl8ba	99.509	59.592	19.215	X	.	.	X	.	.
arl9	L	gene6705	16.259	22.084	X	.	.	U	NA	NA	NA	NA	NA	NA	NA	XBXT10g000133	184.013	196.34	X	X	.	.	ENSDARG00000071881	arl9	114.271	102.113	67.94	X	.	.	.	.	.
armc1	LS	gene16803	68.206	63.931	.	.	.	.	gene10938	97.527	95.697	X	.	U	.	XBXT10g001250	85.867	98.778	X	X	X	U	ENSDARG00000013861	armc1	133.136	118.118	71.805	X	.	.	.	.	.
armc10	L	gene12656	31.847	13.653	.	.	.	.	NA	NA	NA	NA	NA	NA	NA	XBXT10g009194	21.551	22.768	X	X	X	.	NA	NA	NA	NA	NA	NA	NA	NA	NA	NA	NA
armc2	L	gene2877	5.664	15.624	.	.	.	.	NA	NA	NA	NA	NA	NA	NA	XBXT10g002743	1.659	1.583	X	X	.	.	ENSDARG00000022660	armc2	0.31	0.853	0.368	.	.	.	.	.	.
armc3	L	gene5944	0.183	0.206	.	.	.	.	NA	NA	NA	NA	NA	NA	NA	XBXT10g016810	0.028	0.077	X	.	.	.	NA	NA	NA	NA	NA	NA	NA	NA	NA	NA	NA
armc5	L	gene5333	7.886	6.038	.	.	.	.	NA	NA	NA	NA	NA	NA	NA	XBXT10g017018	3.465	3.728	X	X	.	.	ENSDARG00000078083	armc5	20.872	7.325	3.936	X	.	.	X	.	.
armc6	L	gene8555	25.658	16.69	.	.	.	.	NA	NA	NA	NA	NA	NA	NA	XBXT10g008934	79.162	52.5	X	X	.	.	NA	NA	NA	NA	NA	NA	NA	NA	NA	NA	NA
armc7	L	gene14637	109.487	68.846	X	.	.	.	NA	NA	NA	NA	NA	NA	NA	XBXT10g012753	22.423	18.607	X	X	.	.	ENSDARG00000061197	armc7	6.441	5.509	2.253	X	.	.	.	.	.
armc8	LS	gene47734	18.788	15.75	.	.	.	.	gene9208	24.027	17.383	.	.	.	.	XBXT10g009155	11.534	10.296	X	X	.	.	ENSDARG00000062258	armc8	65.442	60.496	4.173	X	.	.	.	.	.
armc9	L	gene6469	40.423	34.882	.	.	.	.	NA	NA	NA	NA	NA	NA	NA	XBXT10g017589	28.487	31.005	X	X	.	.	NA	NA	NA	NA	NA	NA	NA	NA	NA	NA	NA
armh3	L	gene10799	52.458	54.96	.	.	.	.	NA	NA	NA	NA	NA	NA	NA	XBXT10g018035	7.939	10.028	X	X	.	.	ENSDARG00000104285	armh3	88.304	104.767	82.679	X	.	.	X	.	.
armh4	LS	gene17078	0.153	0.094	.	.	.	.	gene12409	0.15	0.022	.	.	.	.	XBXT10g005168	2.083	2.65	.	X	NA	NA	NA	NA	NA	NA	NA	NA	NA	NA	NA	NA	NA
armt1	L	gene11296	17.177	15.015	.	.	.	.	NA	NA	NA	NA	NA	NA	NA	XBXT10g016495	60.263	36.803	X	X	.	.	ENSDARG00000055676	armt1	122.567	107.11	14.536	X	.	.	.	.	.
arnt	LS	gene9714	47.874	31.291	.	.	.	.	gene7685	50.578	37.805	.	.	.	.	XBXT10g003007	161.135	134.356	X	X	.	.	ENSDARG00000021855	arnt	28.053	13.877	9.615	X	.	.	X	.	.
arnt2	LS	gene18863	0.369	0.758	.	.	.	.	gene6588	0.12	0	.	.	.	.	XBXT10g008039	0.365	0.45	X	.	.	.	ENSDARG00000103697	arnt2	28.368	24.082	20.208	X	.	.	X	.	.
arntl	LS	gene11359	2.375	1.039	.	.	.	.	gene15009	17.914	18.338	.	.	.	.	XBXT10g012686	28.423	32.806	X	X	.	.	ENSDARG00000006791, ENSDARG00000035732	arntl1a, arntl1b	174.46	138.885	11.221	X	.	.	.	.	.
arpc1a	LS	gene18659	70.308	92.164	.	.	.	.	gene15436	48.472	74.031	X	.	D	.	XBXT10g019446	259.327	289.192	X	X	.	.	ENSDARG00000008383	arpc1a	212.927	216.589	129.129	X	.	.	X	.	.
arpc1b	LS	gene3179	14.824	18.434	.	.	.	.	gene15641	4.606	3.227	.	.	.	U	XBXT10g016800	129.543	147.032	X	X	.	.	ENSDARG00000027063	arpc1b	2.454	1.898	1.042	X	.	.	.	.	.
arpc2	LS	gene44998	46.164	52.939	.	.	.	.	gene4238	52.423	45.771	.	.	.	.	XBXT10g008370	99.175	87.816	X	X	.	.	ENSDARG00000075989	arpc2	109.068	130.492	166.614	X	.	.	X	.	.
arpc3	L	gene20455	4.597	0.88	.	.	.	.	NA	NA	NA	NA	NA	NA	NA	XBXT10g004854	134.75	78.702	X	X	X	U	ENSDARG00000057882	arpc3	94.719	47.406	39.98	X	.	.	.	.	.
arpc4	S	NA	NA	NA	NA	NA	NA	NA	gene45348	70.739	85.087	.	.	.	.	XBXT10g016497	156.653	173.222	X	X	.	.	ENSDARG00000054063	arpc4	114.511	146.733	118.319	X	.	.	X	.	.
arpc5	LS	gene9541	64.489	75.562	.	.	.	.	gene9061	33.624	69.039	.	.	D	.	XBXT10g000960	64.976	74.138	X	X	.	.	ENSDARG00000039142, ENSDARG00000019062	arpc5a, arpc5b	86.921	35.385	99.81	X	.	.	X	.	.
arpc5l	LS	gene12819	76.239	73.677	X	X	.	D	gene18420	0.169	0.175	.	.	.	.	XBXT10g015569	95.556	62.724	X	X	X	.	ENSDARG00000035433, ENSDARG00000041720	arpc5lb, arpc5la	65.644	44.237	20.718	X	.	.	X	.	.
arpin	L	gene414	35.378	21.361	.	.	.	.	NA	NA	NA	NA	NA	NA	NA	XBXT10g015875	18.788	21.393	X	X	.	.	ENSDARG00000041085	arpin	16.148	17.39	8.89	X	.	.	.	.	.
arpp19	LS	gene13125	65.806	71.713	.	.	.	.	gene17536	117.389	133.932	X	.	.	.	XBXT10g008490	278.649	340.181	X	X	X	U	ENSDARG00000039880, ENSDARG00000032532	arpp19b, arpp19a	291.034	344.107	127.269	X	.	.	X	.	.
arr3	L	gene8982	0.321	0.225	.	.	.	.	NA	NA	NA	NA	NA	NA	NA	XBXT10g014677	0.05	0.139	X	.	.	.	ENSDARG00000098475	arr3b	2.12	0.976	0.388	X	.	.	.	.	.
arrb1	LS	gene36350	1.328	1.198	.	.	.	.	gene39976	0.329	0.997	.	.	.	.	XBXT10g004550	2.121	1.865	X	X	X	U	ENSDARG00000043241	arrb1	0	0	0	.	.	.	.	.	.
arrb2	LS	gene36092	68.34	67.137	X	.	U	.	gene751	42.392	51.695	X	X	U	.	XBXT10g017100	92.187	105.897	X	X	.	.	ENSDARG00000039215, ENSDARG00000011545	arrb2a, arrb2b	58.55	71.407	53.865	X	.	.	X	.	.
arrdc1	LS	gene6062	59.473	50.482	.	.	.	.	gene3863	82.308	60.934	.	.	U	.	XBXT10g008919	3.036	3.193	X	X	.	.	ENSDARG00000079839, ENSDARG00000068148	arrdc1b, arrdc1a	68.044	57.689	32.907	X	.	.	X	.	.
arrdc2	LS	gene2433	0.569	0.98	.	.	.	.	gene4536	1.993	0.434	.	.	.	.	XBXT10g004144	5.19	5.967	X	X	X	D	ENSDARG00000020761	arrdc2	1.662	6.108	13.619	X	.	.	X	.	.
arrdc3	LS	gene38107	4.881	2.776	.	.	.	.	gene1375	14.12	8.43	X	X	U	.	XBXT10g006221	11.343	10.128	X	X	X	U	ENSDARG00000036028	arrdc3b	5.324	7.589	32.543	X	X	X	X	.	.
arrdc4	LS	gene15453	8.866	7.278	.	.	.	.	gene11362	9.926	9.107	.	.	.	.	XBXT10g000734	16.579	14.612	X	X	.	.	NA	NA	NA	NA	NA	NA	NA	NA	NA	NA	NA
arsa.1	LS	gene9329	0.029	0.082	.	.	.	.	gene785	14.286	16.104	.	.	.	.	XBXT10g006236	10.319	7.657	X	X	.	.	ENSDARG00000042270	arsa	14.872	10.012	2.822	X	.	.	.	.	.
arsa.2	L	gene44926	0	0	.	.	.	.	NA	NA	NA	NA	NA	NA	NA	XBXT10g008164	0.044	0.061	X	.	.	.	ENSDARG00000042270	arsa	14.872	10.012	2.822	X	.	.	.	.	.
arsb	L	gene1089	3.474	5.138	.	.	.	.	NA	NA	NA	NA	NA	NA	NA	XBXT10g009118	4.085	5.796	X	X	.	.	NA	NA	NA	NA	NA	NA	NA	NA	NA	NA	NA
arsd	L	gene10968	12.296	10.968	.	.	.	.	NA	NA	NA	NA	NA	NA	NA	XBXT10g019719	1.85	2.781	X	X	.	.	NA	NA	NA	NA	NA	NA	NA	NA	NA	NA	NA
arsh	L	gene13848	27.321	15.278	.	.	.	.	NA	NA	NA	NA	NA	NA	NA	XBXT10g014364	0	0.091	X	.	.	.	ENSDARG00000002299	arsh	0.911	0.433	2.348	X	.	.	.	.	.
arsi	S	NA	NA	NA	NA	NA	NA	NA	gene47745	5.128	0	.	.	.	.	XBXT10g018101	4.704	5.26	X	X	.	.	ENSDARG00000077606	arsia	0.266	0	0.158	.	.	.	.	.	.
arsj	LS	gene50625	0	0	.	.	.	.	gene35383	0.06	0	.	.	.	.	XBXT10g011524	0	0.022	X	.	.	.	NA	NA	NA	NA	NA	NA	NA	NA	NA	NA	NA
arsk	L	gene10831	1.517	0.497	.	.	.	.	NA	NA	NA	NA	NA	NA	NA	XBXT10g004011	4.356	3.876	X	X	.	.	ENSDARG00000059714	arsk	0.873	0.332	1.557	X	.	.	.	.	.
art1	LS	gene10650	0	0	.	.	.	.	gene15068	0	0	.	.	.	.	XBXT10g010793	0	0	X	.	.	.	NA	NA	NA	NA	NA	NA	NA	NA	NA	NA	NA
art5	LS	gene2010	0.042	0	.	.	.	.	gene14817	0	0	.	.	.	.	XBXT10g017813	33.682	43.598	X	X	.	.	NA	NA	NA	NA	NA	NA	NA	NA	NA	NA	NA
artn	LS	gene5808	0.034	0	.	.	.	.	gene1341	0.012	0.017	.	.	.	.	XBXT10g007723	0.092	1.074	X	X	.	.	NA	NA	NA	NA	NA	NA	NA	NA	NA	NA	NA
arv1	LS	gene50773	21.858	23.111	.	.	.	.	gene9999	11.976	14.731	.	.	.	.	XBXT10g009335	44.277	41.415	X	X	.	.	ENSDARG00000074757	arv1	34.826	35.77	5.55	X	.	.	.	.	.
arvcf	LS	gene6693	85.769	89.43	X	X	D	D	gene16328	62.401	63.947	X	X	D	D	XBXT10g000041	96.433	109.011	X	X	.	.	ENSDARG00000074329	arvcfa	0.797	0.17	0.118	.	.	.	.	.	.
arx	LS	gene18907	0.056	0.338	.	.	.	.	gene16037	0	0.211	.	.	.	.	XBXT10g001282	0	0.331	X	.	X	.	ENSDARG00000101523, ENSDARG00000058011	arxb, arxa	0.393	0.224	0	.	.	.	.	.	.
as3mt.2	L	gene40448	0	0	.	.	.	.	NA	NA	NA	NA	NA	NA	NA	XBXT10g004370	0.032	0	X	.	.	.	ENSDARG00000027572	as3mt	3.465	2.195	3.434	X	.	.	.	.	.
asah1	L	gene12581	38.554	81.642	.	.	.	.	NA	NA	NA	NA	NA	NA	NA	XBXT10g019546	28.908	37.189	X	X	.	.	ENSDARG00000034817, ENSDARG00000037091	asah1b, asah1a	156.924	128.427	36.7	X	.	.	X	.	.
asah2	L	gene43728	0	0	.	.	.	.	NA	NA	NA	NA	NA	NA	NA	XBXT10g008260	0.059	0	X	.	.	.	ENSDARG00000012829	asah2	0	0.243	1.523	X	.	.	.	.	.
asap1	LS	gene48677	25.521	18.261	.	.	.	.	gene47510	28.987	22.963	.	.	.	.	XBXT10g019746	5.859	7.201	X	X	.	.	ENSDARG00000021896	asap3	47.165	38.639	3.091	X	.	.	X	.	.
asap2	LS	gene38208	34.047	28.47	.	.	.	.	gene46035	22.72	20.888	.	.	.	.	XBXT10g002565	6.688	6.528	X	X	.	.	ENSDARG00000019564, ENSDARG00000010181	asap2b, asap2a	62.813	36.638	22.803	X	.	.	X	.	.
asap3	L	gene16284	4.032	0.225	.	.	.	U	NA	NA	NA	NA	NA	NA	NA	XBXT10g010337	0	0.02	X	.	.	.	ENSDARG00000021896	asap3	47.165	38.639	3.091	X	.	.	X	.	.
asb1	L	gene614	7.551	7.808	.	.	.	.	NA	NA	NA	NA	NA	NA	NA	XBXT10g014241	1.956	1.45	X	X	.	.	ENSDARG00000026635	asb1	0.911	2.598	1.625	X	.	.	.	.	.
asb11	L	gene13924	0	0	.	.	.	.	NA	NA	NA	NA	NA	NA	NA	XBXT10g019764	0.199	0.556	X	.	.	.	ENSDARG00000056561	asb11	0.416	236.792	762.323	X	X	X	X	X	X
asb12	L	gene18953	18.037	19.912	.	.	.	.	NA	NA	NA	NA	NA	NA	NA	XBXT10g015313	48.012	35.845	X	X	.	.	ENSDARG00000017086, ENSDARG00000037558	asb12a, asb12b	9.077	8.944	17.764	X	.	.	.	.	.
asb12.2	LS	gene18934	0.016	0.023	.	.	.	.	gene13071	0	0	.	.	.	.	XBXT10g013168	0.083	0	X	.	.	.	ENSDARG00000017086	asb12a	9.077	8.84	17.764	X	.	.	.	.	.
asb13	L	gene49986	12.537	12.939	.	.	.	.	NA	NA	NA	NA	NA	NA	NA	XBXT10g001729	22.889	11.056	X	X	.	.	ENSDARG00000079698	asb13a.1	2.263	2.119	0.384	X	.	.	.	.	.
asb15	L	gene14428	1.142	0.417	.	.	.	.	NA	NA	NA	NA	NA	NA	NA	XBXT10g007302	0.11	0.103	X	.	.	.	NA	NA	NA	NA	NA	NA	NA	NA	NA	NA	NA
asb16	L	gene15307	0.316	0.069	.	.	.	.	NA	NA	NA	NA	NA	NA	NA	XBXT10g017306	0	0.041	X	.	.	.	ENSDARG00000056468	asb16	7.725	4.905	1.253	X	.	.	.	.	.
asb18	LS	gene8744	0	0	.	.	.	.	gene44424	0	0	.	.	.	.	XBXT10g019120	0	0	X	.	.	.	ENSDARG00000114572	asb18	0.141	0.201	0.168	.	.	.	.	.	.
asb2	LS	gene6626	0.106	0.025	.	.	.	.	gene12030	0.131	0.293	.	.	D	.	XBXT10g005093	0.087	0.208	X	.	.	.	ENSDARG00000003797, ENSDARG00000096748, ENSDARG00000102490	asb2a.1, asb2a.1, asb2b	0	0.091	0.5	.	.	.	.	.	.
asb3	S	NA	NA	NA	NA	NA	NA	NA	gene12889	12.861	6.503	.	.	.	.	XBXT10g006390	25.165	22.886	X	X	.	.	ENSDARG00000005246	asb3	81.408	66.639	15.82	X	.	.	X	.	.
asb4	S	NA	NA	NA	NA	NA	NA	NA	gene2265	0	0.014	.	.	.	.	XBXT10g012641	3.079	2.952	X	X	.	.	ENSDARG00000034988	asb4	0	1.186	0.412	X	.	.	.	.	.
asb5	LS	gene18309	0.056	0	.	.	.	.	gene9518	0.139	0	.	.	.	.	XBXT10g000568	3.785	1.761	X	X	.	.	ENSDARG00000097938, ENSDARG00000053222	asb5a, asb5b	5.586	6.82	4.628	X	.	.	.	.	.
asb6	LS	gene50316	15.523	13.629	.	.	.	.	gene6657	61.483	49.762	.	.	.	.	XBXT10g015363	60.491	47.9	X	X	.	.	ENSDARG00000007125	asb6	9.081	15.134	21.39	X	.	.	.	.	.
asb7	LS	gene7626	11.443	6.164	X	.	U	.	gene7915	7.757	4.402	.	.	.	.	XBXT10g002022	54.254	35.139	X	X	X	U	ENSDARG00000006494	asb7	57.849	77.732	30.55	X	.	.	X	.	.
asb8	L	gene17911	60.744	67.72	.	.	.	.	NA	NA	NA	NA	NA	NA	NA	XBXT10g002425	124.383	91.886	X	X	.	.	ENSDARG00000003383	asb8	60.159	42.423	1.875	X	.	.	.	.	.
asb9	L	gene37211	0.11	0	.	.	.	.	NA	NA	NA	NA	NA	NA	NA	XBXT10g018991	0	0	X	.	.	.	NA	NA	NA	NA	NA	NA	NA	NA	NA	NA	NA
ascc1	L	gene17699	5.753	5.779	.	.	.	.	NA	NA	NA	NA	NA	NA	NA	XBXT10g008029	38.817	29.461	X	X	.	.	ENSDARG00000077760	ascc1	55.317	85.231	29.558	X	.	.	.	.	.
ascc2	S	NA	NA	NA	NA	NA	NA	NA	gene37179	58.103	32.959	.	.	.	.	XBXT10g009838	137.663	132.612	X	X	.	.	ENSDARG00000013058	ascc2	76.611	50.136	9.306	X	.	.	.	.	.
ascc3	L	gene8715	35.736	38.834	.	.	.	.	NA	NA	NA	NA	NA	NA	NA	XBXT10g016654	21.772	27.985	X	X	.	.	NA	NA	NA	NA	NA	NA	NA	NA	NA	NA	NA
ascl1	LS	gene36163	1.162	2.485	X	X	.	D	gene46246	5.91	3.258	X	X	.	D	XBXT10g017545	0	0.116	X	.	X	.	ENSDARG00000009702, ENSDARG00000038386, ENSDARG00000101628	ascl1b, ascl1a, ascl1b	0.303	0.85	0.813	.	.	.	.	.	.
ascl2	LS	gene10298	0	0.106	.	.	.	D	gene4493	0.016	0.022	.	.	.	.	XBXT10g014205	0	0.889	X	.	.	.	NA	NA	NA	NA	NA	NA	NA	NA	NA	NA	NA
asf1a	L	gene2680	14.399	15.38	.	.	.	D	NA	NA	NA	NA	NA	NA	NA	XBXT10g019307	4.969	5.73	.	X	NA	NA	NA	NA	NA	NA	NA	NA	NA	NA	NA	NA	NA
asf1b	LS	gene12090	126.499	139.853	X	.	U	.	gene1624	0.224	0.106	.	.	.	.	XBXT10g007615	199.529	154.894	X	X	X	U	ENSDARG00000101037, ENSDARG00000043713	asf1ba, asf1bb	410.495	202.647	71.967	X	.	X	X	.	.
ash2l	LS	gene4575	71.514	67.018	.	.	.	.	gene14138	79.083	72.886	.	.	.	.	XBXT10g012935	25.07	30.7	X	X	.	.	NA	NA	NA	NA	NA	NA	NA	NA	NA	NA	NA
asic4	LS	gene35183	0	0	.	.	.	.	gene47778	0.899	0.078	.	.	.	.	XBXT10g014377	0.023	0.033	X	.	.	.	ENSDARG00000025162, ENSDARG00000004243	asic4a, asic4b	0	0.074	0.768	.	.	.	.	.	.
asl	L	gene41266	19.536	30.714	X	X	U	D	NA	NA	NA	NA	NA	NA	NA	XBXT10g002705	13.661	18.892	X	X	X	U	ENSDARG00000033361	asl	20.782	40.078	7.071	X	.	.	.	.	.
asmt	LS	gene38213	0	0	.	.	.	.	gene7781	0	0.026	.	.	.	.	XBXT10g018050	0.704	0.983	X	.	.	.	ENSDARG00000070874, ENSDARG00000070874, ENSDARG00000098249, ENSDARG00000098249	asmt2, asmt2, asmt, asmt	0	1.163	1.69	X	.	.	.	.	.
asmtl	L	gene1407	110.021	84.452	.	.	.	.	NA	NA	NA	NA	NA	NA	NA	XBXT10g011926	88.418	93.598	X	X	.	.	ENSDARG00000021433, ENSDARG00000021433	asmtl, asmtl	321.472	288.956	29.937	X	.	.	.	.	.
asns	L	gene537	0.423	1.129	.	.	.	.	NA	NA	NA	NA	NA	NA	NA	XBXT10g010558	7.148	9.478	X	X	.	.	ENSDARG00000016375	asns	22.605	12.68	6.503	X	.	.	.	.	.
asnsd1	L	gene485	43.742	34.531	.	.	.	U	NA	NA	NA	NA	NA	NA	NA	XBXT10g004704	205.491	238.747	X	X	X	U	ENSDARG00000000540	asdurf	13.308	15.175	15.432	X	.	.	.	.	.
aspa	L	gene44535	1.002	0.724	.	.	.	.	NA	NA	NA	NA	NA	NA	NA	XBXT10g002741	12.937	8.348	X	X	.	.	ENSDARG00000005154	aspa	7.548	12.911	11.781	X	.	.	.	.	.
aspdh	S	NA	NA	NA	NA	NA	NA	NA	gene34367	0	0	.	.	.	.	XBXT10g007691	0	0.069	.	.	NA	NA	ENSDARG00000038297	aspdh	0	0	0	.	.	.	.	.	.
aspg	L	gene35314	28.935	25.222	.	.	.	.	NA	NA	NA	NA	NA	NA	NA	XBXT10g016655	9.662	10.163	X	X	.	.	ENSDARG00000052942	aspg	26.245	18.603	13.707	X	.	.	.	.	.
asph	L	gene45625	34.409	40.175	.	.	.	.	NA	NA	NA	NA	NA	NA	NA	XBXT10g000097	45.274	61.87	X	X	.	.	ENSDARG00000055945	asph	40.954	33.959	48.907	X	.	X	X	.	.
asphd2	LS	gene15929	20.894	25.639	.	.	.	.	gene10846	14.007	34.622	.	.	U	U	XBXT10g006719	31.537	34.328	X	X	.	.	ENSDARG00000059629	asphd2	3.86	4.633	5.073	X	.	.	.	.	.
aspn	LS	gene20217	0	0	.	.	.	.	gene34751	0	0.039	.	.	.	.	XBXT10g003976	0	0	X	.	.	.	ENSDARG00000002192	aspn	0	0	0	.	.	.	.	.	.
aspscr1	S	NA	NA	NA	NA	NA	NA	NA	gene2081	67.343	55.445	.	.	.	.	XBXT10g012970	43.23	48.857	X	X	.	.	ENSDARG00000105321	aspscr1	31.725	27.617	13.386	X	.	.	.	.	.
asrgl1	L	gene41074	30.603	32.683	.	.	.	U	NA	NA	NA	NA	NA	NA	NA	XBXT10g018560	20.355	21.04	X	X	.	.	ENSDARG00000021681	asrgl1	19.181	3.365	1.974	X	.	.	.	.	.
ass1	LS	gene41189	0.082	0	.	.	.	.	gene2237	0.034	0.047	.	.	.	.	XBXT10g001221	0	0	X	.	.	.	NA	NA	NA	NA	NA	NA	NA	NA	NA	NA	NA
aste1	L	gene5399	42.811	21.969	.	.	.	.	NA	NA	NA	NA	NA	NA	NA	XBXT10g006961	56.558	59.968	X	X	.	.	ENSDARG00000070132	aste1a	0	0.189	0.131	.	.	.	.	.	.
astl	L	gene35400	31.023	26.725	.	.	.	.	NA	NA	NA	NA	NA	NA	NA	XBXT10g003785	4.119	3.087	X	X	.	.	NA	NA	NA	NA	NA	NA	NA	NA	NA	NA	NA
astl2a	S	NA	NA	NA	NA	NA	NA	NA	gene42923	0.083	0	.	.	.	.	XBXT10g008113	0	0	X	.	.	.	NA	NA	NA	NA	NA	NA	NA	NA	NA	NA	NA
astl2b	L	gene45401	0	0	.	.	.	.	NA	NA	NA	NA	NA	NA	NA	XBXT10g005174	0	0.097	.	.	NA	NA	NA	NA	NA	NA	NA	NA	NA	NA	NA	NA	NA
astl2d.1	L	gene35039	0.033	0.07	.	.	.	.	NA	NA	NA	NA	NA	NA	NA	XBXT10g005690	0	9.106	.	X	NA	NA	NA	NA	NA	NA	NA	NA	NA	NA	NA	NA	NA
astl2d.2	L	gene38748	0	0	.	.	.	.	NA	NA	NA	NA	NA	NA	NA	XBXT10g017145	0.044	0.061	.	.	NA	NA	NA	NA	NA	NA	NA	NA	NA	NA	NA	NA	NA
astl2d.3	L	gene2942	0.022	0.031	.	.	.	.	NA	NA	NA	NA	NA	NA	NA	XBXT10g005404	0	0	.	.	NA	NA	NA	NA	NA	NA	NA	NA	NA	NA	NA	NA	NA
astl2f	S	NA	NA	NA	NA	NA	NA	NA	gene11286	0	0.04	.	.	.	.	XBXT10g015728	0.108	0.1	.	.	NA	NA	NA	NA	NA	NA	NA	NA	NA	NA	NA	NA	NA
astl2g	L	gene638	0	0.025	.	.	.	.	NA	NA	NA	NA	NA	NA	NA	XBXT10g016767	0	0	.	.	NA	NA	NA	NA	NA	NA	NA	NA	NA	NA	NA	NA	NA
astl3a.1	L	gene49841	0.067	0.089	.	.	.	.	NA	NA	NA	NA	NA	NA	NA	XBXT10g010423	0.121	0	.	.	NA	NA	NA	NA	NA	NA	NA	NA	NA	NA	NA	NA	NA
astl3c	L	gene7855	0.013	0	.	.	.	.	NA	NA	NA	NA	NA	NA	NA	XBXT10g002087	0.032	0.045	.	.	NA	NA	NA	NA	NA	NA	NA	NA	NA	NA	NA	NA	NA
astn1	LS	gene34892	0	0	.	.	.	.	gene18477	0	0	.	.	.	.	XBXT10g000784	0.024	0.049	X	.	.	.	ENSDARG00000068323	astn1	8.82	10.919	4.195	X	.	.	.	.	.
asxl1	LS	gene19411	103.431	94.174	X	.	U	.	gene17613	81.483	79.704	X	.	U	D	XBXT10g018648	59.813	56.736	X	X	X	U	NA	NA	NA	NA	NA	NA	NA	NA	NA	NA	NA
asxl2	S	NA	NA	NA	NA	NA	NA	NA	gene50370	3.649	2.927	.	.	.	.	XBXT10g006036	0.221	0.197	X	.	.	.	ENSDARG00000076501	asxl2	5.807	6.114	1.057	X	.	.	.	.	.
asxl3	LS	gene18359	16.095	13.313	.	.	.	.	gene9008	16.647	14.291	.	.	.	.	XBXT10g001886	7.959	9.462	X	X	X	U	NA	NA	NA	NA	NA	NA	NA	NA	NA	NA	NA
asz1	L	gene9723	1.331	2.084	.	.	.	.	NA	NA	NA	NA	NA	NA	NA	XBXT10g014595	17.943	10.038	X	X	.	.	ENSDARG00000004823	asz1	240.86	180.455	8.873	X	.	.	.	.	.
atad1	LS	gene10475	46.475	49.844	.	.	.	.	gene11037	38.502	29.606	.	.	.	.	XBXT10g009237	23.939	25.732	X	X	.	.	ENSDARG00000056609, ENSDARG00000023267	atad1b, atad1a	107.819	118.62	40.912	X	.	.	.	.	.
atad2	LS	gene2062	132.495	150.024	X	.	.	.	gene36365	130.962	139.725	X	.	U	.	XBXT10g001993	327.641	342.255	X	X	.	.	ENSDARG00000076590	atad2	120.149	64.629	15.27	X	.	.	X	.	.
atad2b	LS	gene47377	86.91	80.48	.	.	.	.	gene1439	79.52	79.445	.	.	.	.	XBXT10g006585	25.066	25.26	X	X	.	.	NA	NA	NA	NA	NA	NA	NA	NA	NA	NA	NA
atad3a	LS	gene20310	149.347	124.758	.	.	.	.	gene8393	158.863	117.135	.	.	.	.	XBXT10g002974	292.012	210.064	X	X	.	.	NA	NA	NA	NA	NA	NA	NA	NA	NA	NA	NA
atad5	L	gene13456	120.301	112.856	X	.	U	.	NA	NA	NA	NA	NA	NA	NA	XBXT10g009488	105.19	114.54	X	X	.	.	ENSDARG00000101126, ENSDARG00000070568	atad5b, atad5a	189.999	184.585	98.395	X	.	X	X	.	.
atat1	LS	gene36334	28	26.96	.	.	.	.	gene4102	144.582	116.694	.	.	.	.	XBXT10g019500	0.49	1.083	X	X	.	.	ENSDARG00000004472	atat1	3.466	1.914	1.417	X	.	.	.	.	.
atcay	L	gene2187	0.089	0.06	.	.	.	.	NA	NA	NA	NA	NA	NA	NA	XBXT10g012341	0.269	0.273	X	.	.	.	NA	NA	NA	NA	NA	NA	NA	NA	NA	NA	NA
ate1	LS	gene2535	21.292	12.172	.	.	.	.	gene10234	5.691	8.737	.	.	.	.	XBXT10g015299	24.704	18.752	X	X	.	.	NA	NA	NA	NA	NA	NA	NA	NA	NA	NA	NA
atf1	LS	gene46197	104.97	107.702	.	.	.	.	gene10195	91.206	107.149	.	.	.	.	XBXT10g008443	146.933	186.442	X	X	.	.	ENSDARG00000044301	atf1	54.896	53.45	33.824	X	.	.	X	.	.
atf2	L	gene19050	46.985	37.919	.	.	.	.	NA	NA	NA	NA	NA	NA	NA	XBXT10g007934	9.046	6.966	X	X	.	.	ENSDARG00000023903	atf2	6.84	4.926	1.712	X	.	.	.	.	.
atf3	LS	gene14557	0.428	0.893	.	.	.	.	gene3961	0	0.765	X	X	U	D	XBXT10g002942	0.286	3.882	X	X	.	U	ENSDARG00000007823	atf3	20.835	9.794	4.349	X	.	.	.	.	.
atf4	LS	gene18245	36.134	62.427	X	X	U	D	gene18950	4.854	14.529	X	X	U	.	XBXT10g010586	14.123	22.589	X	X	X	.	ENSDARG00000038141, ENSDARG00000111939	atf4b, atf4a	9.793	24.973	188.674	X	.	.	X	.	.
atf5.2	S	NA	NA	NA	NA	NA	NA	NA	gene18684	66.606	71.134	.	.	.	.	XBXT10g008815	80.12	62.287	X	X	.	.	NA	NA	NA	NA	NA	NA	NA	NA	NA	NA	NA
atf6	LS	gene6146	9.811	10.525	.	.	.	.	gene539	13.824	10.561	.	.	.	.	XBXT10g002920	10.57	14.324	X	X	.	.	ENSDARG00000012656	atf6	17.959	7.152	13.938	X	.	.	X	.	.
atf6b	LS	gene19041	16.851	17.649	.	.	.	U	gene44246	8.724	29.556	.	.	.	U	XBXT10g001913	39.106	29.652	X	X	.	.	NA	NA	NA	NA	NA	NA	NA	NA	NA	NA	NA
atf7	LS	gene38264	7.462	4.489	.	.	.	.	gene19929	5.072	3.513	.	.	.	.	XBXT10g016342	13.881	7.944	X	X	.	.	ENSDARG00000011298, ENSDARG00000055481	atf7a, atf7b	60.798	29.574	7.233	X	.	.	.	.	.
atf7ip	LS	gene4107	115.837	96.747	.	.	.	.	gene16964	53.197	33.284	.	.	D	.	XBXT10g012830	71.798	80.036	X	X	.	.	ENSDARG00000069619	atf7ip	187.238	163.893	115.344	X	X	X	X	.	.
atg10	L	gene7059	2.977	0.804	.	.	.	.	NA	NA	NA	NA	NA	NA	NA	XBXT10g010295	5.364	2.863	X	X	.	.	ENSDARG00000104846	atg10	6.082	4.523	0.943	X	.	.	.	.	.
atg101	LS	gene3085	74.414	51.687	.	.	.	.	gene11342	63.11	63.457	.	.	.	.	XBXT10g003263	121.32	72.614	X	X	.	.	ENSDARG00000043287	atg101	140.308	108.544	18.776	X	.	.	.	.	.
atg12	S	NA	NA	NA	NA	NA	NA	NA	gene7581	13.903	6.323	X	.	.	.	XBXT10g019030	32.398	11.695	X	X	.	.	ENSDARG00000069545	atg12	80.18	13.931	14.983	X	.	.	X	.	.
atg13	LS	gene4842	2.556	2.511	.	.	.	D	gene18507	23.018	21.936	.	.	.	.	XBXT10g011836	12.618	10.797	X	X	.	.	ENSDARG00000036040	atg13	111.382	86.455	61.946	X	.	.	X	.	.
atg14	L	gene430	11.298	13.072	.	.	.	.	NA	NA	NA	NA	NA	NA	NA	XBXT10g018625	56.075	48.308	X	X	.	.	NA	NA	NA	NA	NA	NA	NA	NA	NA	NA	NA
atg16l1	LS	gene41268	12.145	75.786	X	X	D	.	gene20043	61.539	87.177	X	X	.	.	XBXT10g009038	121.469	135.929	X	X	X	D	ENSDARG00000099430	atg16l1	114.481	132.035	61.966	X	X	X	X	.	X
atg2a	L	gene9947	35.023	16.462	.	.	.	.	NA	NA	NA	NA	NA	NA	NA	XBXT10g016144	19.386	17.811	X	X	.	.	NA	NA	NA	NA	NA	NA	NA	NA	NA	NA	NA
atg2b	LS	gene17938	13.062	13.33	.	.	.	.	gene13426	8.207	8.466	.	.	.	.	XBXT10g002455	6.808	8.099	X	X	.	.	ENSDARG00000097650	atg2b	12.296	14.678	6.625	X	.	.	.	.	.
atg3	LS	gene40355	47.574	52.109	.	.	.	.	gene16553	29.64	41.658	.	.	.	.	XBXT10g003434	100.383	103.534	X	X	.	.	ENSDARG00000009350	atg3	168.444	76.127	24.203	X	.	.	X	.	.
atg4a	LS	gene17865	11.686	10.065	.	.	.	.	gene8043	7.687	12.432	.	.	.	.	XBXT10g006608	20.931	15.754	X	X	.	.	ENSDARG00000014531	atg4a	6.567	4.79	8.498	X	.	.	.	.	.
atg4b	LS	gene19126	8.134	7.842	.	.	.	.	gene43716	2.909	2.277	.	.	.	.	XBXT10g017760	21.835	24.091	X	X	.	.	ENSDARG00000052104	atg4b	57.345	32.133	4.481	X	.	.	.	.	.
atg4c	LS	gene13199	68.642	77.439	.	.	.	.	gene16685	151.049	195.391	.	.	.	.	XBXT10g020026	193.725	229.059	X	X	.	.	ENSDARG00000044373	atg4c	3.305	11.265	26.487	X	.	.	X	.	.
atg4d	LS	gene18125	15.375	11.727	.	.	.	.	gene6003	4.479	6.693	.	.	.	D	XBXT10g009672	33.922	42.325	X	X	.	.	ENSDARG00000088145	atg4db	99.995	103.207	9.482	X	.	.	.	.	.
atg5	L	gene9664	28.12	25.274	.	.	.	.	NA	NA	NA	NA	NA	NA	NA	XBXT10g014978	23.537	22.033	X	X	X	U	ENSDARG00000023396	atg5	43.262	32.714	1.54	X	.	.	.	.	.
atg9a	LS	gene42638	6.264	7.045	.	.	.	.	gene39123	2.938	3.25	.	.	.	.	XBXT10g015922	3.002	3.116	X	X	.	.	ENSDARG00000044551	atg9a	10.817	11.994	0.354	X	.	.	.	.	.
atg9b	L	gene36747	8.902	8.457	.	.	.	.	NA	NA	NA	NA	NA	NA	NA	XBXT10g011385	11.2	10.705	X	X	.	.	ENSDARG00000055292	atg9b	36.914	36.982	19.283	X	.	.	X	.	.
atic	LS	gene14313	76.931	81.217	.	.	.	.	gene850	65.283	63.031	.	.	.	.	XBXT10g009554	107.548	63.153	X	X	.	.	ENSDARG00000016706	atic	189.296	129.008	45.496	X	.	.	X	.	.
atl1	LS	gene4249	0.548	1.223	.	.	.	.	gene10511	2.49	3.517	.	.	.	.	XBXT10g003205	16.56	14.008	X	X	.	.	ENSDARG00000060481	atl1	0.817	1.009	0.162	X	.	.	.	.	.
atl2	L	gene13343	97.233	88.935	.	.	.	.	NA	NA	NA	NA	NA	NA	NA	XBXT10g005121	103.119	106.718	X	X	.	.	ENSDARG00000057719	atl2	162.832	166.481	15.585	X	.	.	.	.	.
atm	L	gene46760	13.525	14.27	.	.	.	.	NA	NA	NA	NA	NA	NA	NA	XBXT10g011459	6.892	7.662	X	X	.	.	ENSDARG00000002385	atm	23.358	18.5	1.136	X	.	.	.	.	.
atmin	L	gene7151	79.141	64.986	X	X	U	.	NA	NA	NA	NA	NA	NA	NA	XBXT10g014831	94.535	86.735	X	X	X	U	ENSDARG00000068601	atmin	16.344	3.081	3.291	X	.	.	.	.	.
atn1	LS	gene36172	4.775	3.711	.	.	.	.	gene38333	9.127	7.647	.	.	.	.	XBXT10g011280	0.219	0.35	X	.	.	.	ENSDARG00000092067	atn1	0	0.029	0.612	.	.	.	.	.	.
atoh1	LS	gene37549	1.386	3.845	X	X	U	D	gene36959	0.387	2.905	X	X	U	D	XBXT10g000732	0.621	0.713	X	.	.	.	ENSDARG00000055294, ENSDARG00000099564	atoh1a, atoh1b	0	1.053	0	X	.	.	.	.	.
atoh7	LS	gene48076	0	0	.	.	.	.	gene12632	0.021	0	.	.	.	.	XBXT10g025103	0	0.296	X	.	.	.	ENSDARG00000069552	atoh7	0	0	0	.	.	.	.	.	.
atoh8	LS	gene14689	0	0.015	.	.	.	.	gene9993	0	0	.	.	.	.	XBXT10g002976	0	0	X	.	.	.	ENSDARG00000037555	atoh8	0	0.164	0.171	.	.	.	.	.	.
atox1	LS	gene13881	12.296	3.681	.	.	.	.	gene19755	30.948	15.076	.	.	.	.	XBXT10g010866	24.016	15.33	X	X	.	.	ENSDARG00000087693	atox1	27.765	7.915	11.349	X	.	.	.	.	.
atp11b	L	gene50274	67.649	54.939	.	.	.	.	NA	NA	NA	NA	NA	NA	NA	XBXT10g017814	54.636	68.952	X	X	.	.	NA	NA	NA	NA	NA	NA	NA	NA	NA	NA	NA
atp11c	LS	gene13629	10.357	9.38	.	.	.	.	gene18764	9.303	10.595	.	.	.	.	XBXT10g017508	24.057	28.988	X	X	.	.	ENSDARG00000036442	atp11c	44.527	30.89	4.686	X	.	.	.	.	.
atp12a	LS	gene721	0.078	0.108	.	.	.	.	gene17796	0	0.04	.	.	.	.	XBXT10g004508	0.092	0.128	.	.	NA	NA	NA	NA	NA	NA	NA	NA	NA	NA	NA	NA	NA
atp13a-like	LS	gene2179	0.051	0.265	.	.	.	.	gene18778	0	0	.	.	.	.	XBXT10g001971	67.994	39.697	X	X	X	D	NA	NA	NA	NA	NA	NA	NA	NA	NA	NA	NA
atp13a1	L	gene34617	70.067	78.174	.	.	.	.	NA	NA	NA	NA	NA	NA	NA	XBXT10g017346	114.481	105.578	X	X	.	.	ENSDARG00000029931	atp13a1	83.724	64.076	32.692	X	.	.	X	.	.
atp13a3	L	gene38012	36.002	27.739	.	.	.	.	NA	NA	NA	NA	NA	NA	NA	XBXT10g001079	10.927	12.507	X	X	.	.	ENSDARG00000076622	atp13a3	1.93	1.577	2.601	X	.	.	X	.	.
atp13a4	LS	gene45825	0.148	0.245	.	.	.	D	gene42683	21.123	25.31	.	.	.	.	XBXT10g009690	99.128	65.931	X	X	X	D	NA	NA	NA	NA	NA	NA	NA	NA	NA	NA	NA
atp13a5	L	gene11119	0.01	0.126	.	.	.	.	NA	NA	NA	NA	NA	NA	NA	XBXT10g011263	0.047	0.174	X	.	.	.	NA	NA	NA	NA	NA	NA	NA	NA	NA	NA	NA
atp13a5l.1	LS	gene49374	0.091	0.329	.	.	.	.	gene14717	13.798	9.079	.	.	.	.	XBXT10g015745	2.132	2.199	.	X	NA	NA	NA	NA	NA	NA	NA	NA	NA	NA	NA	NA	NA
atp13a5l.2	L	gene16390	0.123	0.318	.	.	.	U	NA	NA	NA	NA	NA	NA	NA	XBXT10g006630	0.694	1.076	.	X	NA	NA	NA	NA	NA	NA	NA	NA	NA	NA	NA	NA	NA
atp13a5l.3	L	gene44942	0	0.021	.	.	.	.	NA	NA	NA	NA	NA	NA	NA	XBXT10g016781	0.038	0	.	.	NA	NA	NA	NA	NA	NA	NA	NA	NA	NA	NA	NA	NA
atp1a1	LS	gene14665	45.905	46.13	X	X	U	D	gene39150	50.922	77.875	X	X	U	D	XBXT10g007187	118.305	114.384	X	X	X	U	ENSDARG00000002791, ENSDARG00000019856	atp1a1a.1, atp1a1b	254.534	257.177	283.532	X	X	X	X	.	.
atp1a2	LS	gene9716	0.072	0	.	.	.	.	gene12419	0	0.042	.	.	.	.	XBXT10g004469	0.081	0.084	X	.	.	.	ENSDARG00000010472	atp1a2a	0.153	0.131	0	.	.	.	.	.	.
atp1a3	L	gene18730	0	0.073	.	.	.	.	NA	NA	NA	NA	NA	NA	NA	XBXT10g019651	0.022	0.092	X	.	X	U	ENSDARG00000104139, ENSDARG00000018259	atp1a3b, atp1a3a	0.234	0.102	0.212	.	.	.	.	.	.
atp1b1	LS	gene3713	7.6	7.898	X	X	D	D	gene5134	23.994	52.693	X	X	U	D	XBXT10g019499	50.356	92.206	X	X	X	D	ENSDARG00000076833, ENSDARG00000013144	atp1b1b, atp1b1a	1.017	22.694	256.452	X	X	X	X	X	X
atp1b2	LS	gene42427	0.066	0.848	.	.	U	D	gene9241	0	0	.	.	.	.	XBXT10g011400	0.108	47.474	X	X	X	D	ENSDARG00000099203, ENSDARG00000034424	atp1b2a, atp1b2b	0.235	0.267	7.527	X	.	.	X	.	.
atp1b3	LS	gene4906	83.131	66.488	X	X	U	D	gene16064	58.482	53.511	X	X	U	D	XBXT10g007986	237.288	257.329	X	X	X	.	ENSDARG00000015790, ENSDARG00000042837	atp1b3a, atp1b3b	215.001	197.526	132.731	X	.	X	X	.	X
atp1b4	L	gene1928	0	0	.	.	.	.	NA	NA	NA	NA	NA	NA	NA	XBXT10g018543	0	0	X	.	.	.	ENSDARG00000053262	atp1b4	0.482	0.069	0.43	.	.	.	.	.	.
atp23	L	gene8885	44.34	36.496	X	.	.	.	NA	NA	NA	NA	NA	NA	NA	XBXT10g011600	132.305	131.713	X	X	.	.	ENSDARG00000063686	atp23	62.863	41	7.827	X	.	.	.	.	.
atp2a1	LS	gene50063	0	0	.	.	.	.	gene44388	0	0.023	.	.	.	.	XBXT10g004373	0	0	X	.	.	.	ENSDARG00000020574	atp2a1	0.143	0.284	0.169	.	.	.	.	.	.
atp2a2	S	NA	NA	NA	NA	NA	NA	NA	gene48795	122.065	127.101	X	X	U	D	XBXT10g018512	142.465	179.05	X	X	X	.	ENSDARG00000005122, ENSDARG00000029439	atp2a2b, atp2a2a	267.271	275.885	169.719	X	.	X	X	.	X
atp2a3	LS	gene37062	27.839	29.271	X	X	U	D	gene14732	9.857	7.087	.	.	.	.	XBXT10g004396	58.236	62.524	X	X	.	.	ENSDARG00000060978	atp2a3	41.001	19.528	7.724	X	.	.	.	.	.
atp2b1	LS	gene23757	37.117	33.595	.	.	.	.	gene2746	43.65	39.181	.	.	.	.	XBXT10g005503	90.996	104.826	X	X	.	.	ENSDARG00000012684, ENSDARG00000007788	atp2b1a, atp2b1b	134.497	102.457	119.229	X	.	X	X	.	.
atp2b3	LS	gene45877	2.018	2.098	.	.	.	.	gene44859	0.403	1.139	.	.	.	.	XBXT10g007775	0.084	0.117	X	.	.	.	ENSDARG00000023445, ENSDARG00000043474	atp2b3b, atp2b3a	2.945	1.962	0.562	X	.	.	.	.	.
atp2c1	LS	gene44913	82.621	99.02	.	.	.	.	gene11810	11.006	7.828	.	.	.	.	XBXT10g012214	166.264	183.088	X	X	.	.	ENSDARG00000060197	atp2c1	52.361	44.247	13.903	X	.	X	X	.	.
atp2c2	LS	gene10255	0.034	0.045	.	.	.	.	gene6377	0.03	0.062	.	.	.	.	XBXT10g004142	1.949	3.109	X	X	.	.	NA	NA	NA	NA	NA	NA	NA	NA	NA	NA	NA
atp4a	LS	gene3769	0.498	9.628	.	.	.	.	gene19770	0.016	0.321	.	.	.	.	XBXT10g014055	0.309	0.144	X	.	.	.	NA	NA	NA	NA	NA	NA	NA	NA	NA	NA	NA
atp4b	LS	gene938	0	0	.	.	.	.	gene2572	0.01	0	.	.	.	.	XBXT10g011162	0	0	X	.	.	.	NA	NA	NA	NA	NA	NA	NA	NA	NA	NA	NA
atp5f1a	LS	gene1225	280.931	209.919	X	X	D	.	gene16088	223.438	179.577	X	X	U	D	XBXT10g018123	656.404	336.445	X	X	.	.	ENSDARG00000010149	atp5fa1	946.823	825.752	354.814	X	.	X	X	.	.
atp5f1b	LS	gene19969	242.535	270.199	.	.	.	.	gene13760	425.966	415.447	X	.	U	.	XBXT10g003758	1023.02	988.503	X	X	.	.	ENSDARG00000070083	atp5f1b	1434.46	1251.15	400.967	X	.	.	X	.	.
atp5f1c	LS	gene17062	132.848	98.796	.	.	.	.	gene10107	83.605	58.672	.	.	.	.	XBXT10g016590	464.217	488.711	X	X	.	.	ENSDARG00000045514	atp5f1c	519.163	343.95	90.101	X	.	.	X	.	.
atp5f1d	LS	gene8254	74.864	42.112	.	.	D	U	gene8152	74.856	81.187	.	.	.	.	XBXT10g016592	198.821	94.128	X	X	.	.	ENSDARG00000019404	atp5f1d	95.15	35.042	29.867	X	.	.	X	.	.
atp5if1	LS	gene39457	197.496	120.695	.	.	.	U	gene10015	34.527	14.78	.	.	.	U	XBXT10g004920	252.637	102.985	X	X	.	.	ENSDARG00000044092, ENSDARG00000067975	atp5if1b, atp5if1a	246.639	88.828	98.186	X	.	.	.	.	.
atp5mc1	LS	gene18579	63.751	48.759	.	.	.	.	gene17316	92.993	74.463	.	.	.	.	XBXT10g019659	57.624	35.975	X	X	.	.	ENSDARG00000056008	atp5mc1	297.951	198.18	112.318	X	.	.	.	.	.
atp5mc3	LS	gene38200	391.824	423.649	.	.	.	.	gene835	364.199	328.23	.	.	.	.	XBXT10g010817	969.016	522.172	X	X	.	.	ENSDARG00000009447, ENSDARG00000017775	atp5mc3b, atp5mc3a	855.652	552.685	287.732	X	.	.	X	.	.
atp5me	S	NA	NA	NA	NA	NA	NA	NA	gene13561	10.89	2.231	.	.	.	.	XBXT10g018037	129.073	75.985	X	X	.	.	ENSDARG00000068940, ENSDARG00000078113	atp5meb, atp5mea	168.015	124.745	62.087	X	.	.	.	.	.
atp5mf	LS	gene15274	23.189	6.634	.	.	.	.	gene12631	43.232	19.044	.	.	.	U	XBXT10g002590	80.958	38.445	X	X	X	U	ENSDARG00000037867	atp5mf	59.448	29.442	28.919	X	.	.	.	.	.
atp5mg	L	gene9120	75.468	85.363	.	.	.	.	NA	NA	NA	NA	NA	NA	NA	XBXT10g013776	189.761	116.624	X	X	.	.	ENSDARG00000011841	atp5l	276.671	155.749	38.014	X	.	.	.	.	.
atp5mk	LS	gene20224	78.276	66.946	.	.	.	.	gene9464	69.849	37.928	.	.	.	.	XBXT10g011243	235.606	147.734	X	X	.	.	ENSDARG00000096003	atp5md	19.334	14.253	47.169	X	.	.	X	.	.
atp5pb	LS	gene898	71.27	59.418	.	.	.	.	gene4531	47.059	31.421	.	.	.	.	XBXT10g015742	156.445	46.532	X	X	X	U	ENSDARG00000011553	atp5pb	85.022	50.037	17.588	X	.	.	.	.	.
atp5pd	LS	gene699	129.877	70.717	.	.	.	.	gene6676	81.72	60.016	.	.	.	.	XBXT10g014509	221.584	69.053	X	X	.	.	ENSDARG00000098355	atp5pd	78.426	30.709	13.493	X	.	.	.	.	.
atp5pf	LS	gene9366	88.926	48.837	.	.	.	.	gene20248	54.006	36.361	.	.	.	.	XBXT10g004127	193.835	52.622	X	X	.	.	ENSDARG00000014313	atp5pf	26.789	17.929	31.394	X	.	.	.	.	.
atp5po	LS	gene233	77.259	40.352	.	.	.	.	gene16039	103.668	54.859	X	.	.	.	XBXT10g006169	442.593	192.214	X	X	.	.	ENSDARG00000001788	atp5po	400.805	233.655	42.508	X	.	.	.	.	.
atp6ap1.2	LS	gene16154	13.44	14.505	.	.	.	.	gene10045	29.222	38.075	.	.	.	.	XBXT10g000317	27.409	23.428	X	X	.	.	ENSDARG00000037153	atp6ap1b	46.425	15.488	32	X	.	.	X	.	.
atp6ap1l	L	gene8096	0.215	0.204	.	.	.	.	NA	NA	NA	NA	NA	NA	NA	XBXT10g011525	0.147	0.205	X	.	.	.	NA	NA	NA	NA	NA	NA	NA	NA	NA	NA	NA
atp6ap2	LS	gene16411	88.468	61.109	.	.	.	.	gene8614	35.056	16.703	.	.	D	.	XBXT10g019117	141.513	166.597	X	X	.	.	ENSDARG00000008735	atp6ap2	53.95	28.561	6.055	X	.	.	.	.	.
atp6v0a1	LS	gene7064	10.413	11.384	.	.	.	.	gene20125	69.37	71.52	.	.	.	.	XBXT10g017676	54.858	47.996	X	X	.	.	ENSDARG00000020847, ENSDARG00000015174	atp6v0a1a, atp6v0a1b	68.031	35.252	5.742	X	.	.	X	.	.
atp6v0a2	L	gene43933	86.383	63.574	.	.	.	.	NA	NA	NA	NA	NA	NA	NA	XBXT10g002014	52.368	59.63	X	X	.	.	ENSDARG00000035565	atp6v0a2b	193.778	218.968	13.046	X	.	.	.	.	.
atp6v0a4	L	gene10305	0	0	.	.	.	.	NA	NA	NA	NA	NA	NA	NA	XBXT10g009623	0	0	X	.	.	.	NA	NA	NA	NA	NA	NA	NA	NA	NA	NA	NA
atp6v0b	LS	gene4479	67.943	59.84	.	.	.	.	gene43648	84.526	78.375	.	.	.	.	XBXT10g001974	153.275	170.075	X	X	.	.	ENSDARG00000031681	atp6v0b	94.319	32.91	13.473	X	.	.	.	.	.
atp6v0c	LS	gene122	269.619	272.014	.	.	D	.	gene7992	258.184	277.133	.	.	.	.	XBXT10g009783	84.812	91.342	X	X	.	.	ENSDARG00000036577, ENSDARG00000057853	atp6v0cb, atp6v0ca	97.605	71.315	64.842	X	.	.	X	.	.
atp6v0d1	L	gene17454	35.641	37.403	.	.	.	.	NA	NA	NA	NA	NA	NA	NA	XBXT10g009080	98.869	107.644	X	X	.	.	ENSDARG00000069090	atp6v0d1	145.134	54.261	14.603	X	.	.	X	.	.
atp6v0d2	L	gene5354	0	3.078	.	.	.	U	NA	NA	NA	NA	NA	NA	NA	XBXT10g001222	0.115	1.206	X	X	X	D	NA	NA	NA	NA	NA	NA	NA	NA	NA	NA	NA
atp6v0e1	LS	gene43498	170.168	164.385	X	X	U	D	gene34705	102.675	88.807	.	.	.	.	XBXT10g003275	190.316	216.635	X	X	.	.	ENSDARG00000101794	atp6v0e1	10.864	15.266	10.867	X	.	.	.	.	.
atp6v0e2	S	NA	NA	NA	NA	NA	NA	NA	gene48518	0.885	0.319	.	.	.	.	XBXT10g016092	51.78	41.217	X	X	.	.	NA	NA	NA	NA	NA	NA	NA	NA	NA	NA	NA
atp6v1a	LS	gene13273	19.061	20.222	.	.	.	.	gene4226	39.707	30.496	.	.	.	.	XBXT10g013508	21.009	18.495	X	X	.	.	ENSDARG00000034534, ENSDARG00000076318	atp6v1aa, atp6v1ab	156.651	87.954	17.77	X	.	.	.	.	.
atp6v1al	L	gene20453	15.041	15.988	.	.	.	.	NA	NA	NA	NA	NA	NA	NA	XBXT10g010161	1.017	1.169	.	X	NA	NA	NA	NA	NA	NA	NA	NA	NA	NA	NA	NA	NA
atp6v1b1	L	gene45646	4.541	1.485	.	.	.	.	NA	NA	NA	NA	NA	NA	NA	XBXT10g019748	0.132	0.123	X	.	.	.	NA	NA	NA	NA	NA	NA	NA	NA	NA	NA	NA
atp6v1b2	S	NA	NA	NA	NA	NA	NA	NA	gene19948	99.537	70.809	.	.	.	.	XBXT10g014192	28.788	24.359	X	X	.	.	ENSDARG00000043465	atp6v1b2	13.561	7.302	3.882	X	.	.	.	.	.
atp6v1c1	LS	gene16486	77.544	65.321	.	.	.	.	gene3844	72.179	52.801	X	.	.	.	XBXT10g003125	173.201	192.511	X	X	X	U	ENSDARG00000035880, ENSDARG00000023967	atp6v1c1b, atp6v1c1a	109.808	71.996	12.696	X	.	.	.	.	.
atp6v1c2	LS	gene2837	0.049	0.397	.	.	U	.	gene12703	0.011	0	.	.	.	.	XBXT10g003438	0.476	0.586	X	.	.	.	ENSDARG00000070440	atp6v1c2	0	0.183	0	.	.	.	.	.	.
atp6v1d	LS	gene2591	25.529	12.697	X	X	U	.	gene5289	27.781	21.673	.	.	.	.	XBXT10g009629	116.118	77.768	X	X	X	U	ENSDARG00000011175	atp6v1d	35.136	28.248	30.193	X	.	.	.	.	.
atp6v1e1	LS	gene6868	78.769	86.947	X	.	U	.	gene15464	22.775	21.184	.	.	.	.	XBXT10g002252	33.058	32.245	X	X	.	.	ENSDARG00000030694, ENSDARG00000014085	atp6v1e1b, atp6v1e1a	76.309	58.965	18.157	X	.	.	.	.	.
atp6v1f	LS	gene17489	24.95	13.012	.	.	.	.	gene48959	25.009	9.395	.	.	D	.	XBXT10g005796	101.05	43.112	X	X	.	.	ENSDARG00000045543	atp6v1f	107.969	35.017	31.905	X	.	.	.	.	.
atp6v1g1	LS	gene45949	27.862	28.771	.	.	.	.	gene10937	89.365	72.522	.	.	D	.	XBXT10g009884	127.289	121.084	X	X	.	.	ENSDARG00000022315	atp6v1g1	199.933	123.246	49.613	X	.	.	.	.	.
atp6v1g2	LS	gene194	0.025	0	.	.	.	.	gene15772	2.006	1.623	.	.	.	.	XBXT10g006282	0	0	X	.	.	.	NA	NA	NA	NA	NA	NA	NA	NA	NA	NA	NA
atp6v1g3	LS	gene49178	0	0	.	.	.	.	gene13635	0	0	.	.	.	.	XBXT10g016774	0	0.258	X	.	.	.	NA	NA	NA	NA	NA	NA	NA	NA	NA	NA	NA
atp6v1h	LS	gene7572	50.669	51.198	.	.	.	.	gene18806	50.135	14.766	.	.	.	.	XBXT10g011022	76.062	81.235	X	X	.	.	ENSDARG00000006370	atp6v1h	61	33.612	4.113	X	.	.	.	.	.
atp7a	L	gene19983	24.178	22.517	.	.	.	.	NA	NA	NA	NA	NA	NA	NA	XBXT10g000171	43.24	45.405	X	X	.	.	ENSDARG00000003699	atp7a	44.936	32.199	7.513	X	.	.	.	.	.
atp7b	LS	gene42509	0.134	0.759	.	.	.	.	gene42944	0.041	0	.	.	.	.	XBXT10g001075	5.023	6.295	X	X	.	.	ENSDARG00000058145	atp7b	0	0.372	1.724	X	.	.	.	.	.
atp8a1	LS	gene7900	40.279	32.078	.	.	.	.	gene14801	29.11	23.982	.	.	.	.	XBXT10g015976	36.412	25.546	X	X	.	.	ENSDARG00000063001	atp8a1	26.644	30	3.327	X	.	.	.	.	.
atp8b1	LS	gene18048	89.974	84.503	.	.	.	.	gene5339	121.255	111.273	.	.	.	.	XBXT10g008296	123.412	168.118	X	X	.	.	NA	NA	NA	NA	NA	NA	NA	NA	NA	NA	NA
atp8b3	L	gene15893	0.057	0.034	.	.	.	.	NA	NA	NA	NA	NA	NA	NA	XBXT10g009852	0.353	0.575	X	.	.	.	ENSDARG00000042285	atp8b3	5.057	1.085	0.884	X	.	.	.	.	.
atp9b	L	gene3488	34.065	38.718	.	.	.	.	NA	NA	NA	NA	NA	NA	NA	XBXT10g006411	14.867	20.293	X	X	.	.	ENSDARG00000062521	atp9b	34.46	25.663	2.843	X	.	.	.	.	.
atpaf1	S	NA	NA	NA	NA	NA	NA	NA	gene15640	13.888	16.212	.	.	.	.	XBXT10g000573	121.597	47.557	X	X	.	.	ENSDARG00000042799	atpaf1	32.142	32.347	38.387	X	.	.	X	.	.
atpaf2	LS	gene20369	16.674	17.533	X	.	U	.	gene11929	58.142	45.03	.	.	.	.	XBXT10g004354	148.292	105.842	X	X	.	.	ENSDARG00000056270	atpaf2	105.235	67.792	11.331	X	.	.	.	.	.
atpsckmt	S	NA	NA	NA	NA	NA	NA	NA	gene1720	21.539	17.41	.	.	.	.	XBXT10g007234	33.719	28.875	X	X	X	U	ENSDARG00000033451	atpsckmt	115.505	78.892	9.519	X	.	.	.	.	.
atr	L	gene45653	21.232	21.731	.	.	.	.	NA	NA	NA	NA	NA	NA	NA	XBXT10g010585	34.527	34.88	X	X	.	.	NA	NA	NA	NA	NA	NA	NA	NA	NA	NA	NA
atraid	S	NA	NA	NA	NA	NA	NA	NA	gene10815	25.85	22.602	.	.	.	.	XBXT10g008936	62.906	21.615	X	X	.	.	ENSDARG00000043388	atraid	0	0.335	0.233	.	.	.	.	.	.
atrip	LS	gene11330	53.311	56.012	.	.	.	.	gene18960	47.716	67.021	X	.	.	.	XBXT10g013972	51.934	49.296	X	X	.	.	ENSDARG00000063076	atrip	85.093	79.947	8.871	X	.	.	.	.	.
atrn	LS	gene1287	43.657	40.033	.	.	.	.	gene3646	57.21	42.714	.	.	.	.	XBXT10g010091	55.002	48.413	X	X	.	.	NA	NA	NA	NA	NA	NA	NA	NA	NA	NA	NA
atrx	L	gene42048	61.65	61.406	.	.	.	.	NA	NA	NA	NA	NA	NA	NA	XBXT10g007766	54.101	65.947	X	X	.	.	ENSDARG00000042236	atrx	97.387	96.678	175.058	X	.	X	X	.	X
atxn1	LS	gene17877	3.625	9.823	.	.	.	.	gene18823	7.482	6.164	.	.	.	.	XBXT10g007839	0.555	0.713	X	.	.	.	ENSDARG00000060862, ENSDARG00000061687	atxn1b, atxn1a	9.595	1.763	1.035	X	.	.	.	.	.
atxn10	L	gene48715	31.556	18.347	.	.	.	.	NA	NA	NA	NA	NA	NA	NA	XBXT10g012263	17.046	14.208	X	X	.	.	ENSDARG00000008439	atxn10	9.414	7.156	0.415	X	.	.	.	.	.
atxn1l	LS	gene17932	54.823	55.282	.	.	.	.	gene16100	35.845	32.219	.	.	.	.	XBXT10g001358	69.493	71.169	X	X	.	.	ENSDARG00000086977	atxn1l	24.019	29.691	12.946	X	X	X	X	.	.
atxn2	LS	gene42906	128.206	82.089	.	.	.	.	gene42372	138.603	99.969	.	.	.	.	XBXT10g004084	84.665	70.677	X	X	.	.	ENSDARG00000052897	atxn2	11.535	7.266	1.863	X	.	.	.	.	.
atxn2l	LS	gene35359	99.376	69.716	X	X	.	.	gene18842	61.804	52.355	X	.	U	.	XBXT10g001730	3.988	5.232	X	X	X	U	ENSDARG00000011597	atxn2l	54.647	33.335	26.012	X	.	X	X	.	.
atxn3	LS	gene4209	55.855	53.305	.	.	.	.	gene15564	54.428	42.777	.	.	.	.	XBXT10g002815	137.49	117.657	X	X	.	.	ENSDARG00000099274	atxn3	38.377	26.073	13.31	X	.	.	.	.	.
atxn7	LS	gene16288	25.789	23.972	.	.	.	.	gene13459	28.002	28.561	.	.	.	.	XBXT10g012271	7.461	7.481	X	X	.	.	NA	NA	NA	NA	NA	NA	NA	NA	NA	NA	NA
atxn7l1	LS	gene19425	19.983	12.379	.	.	.	.	gene39171	14.432	13.376	.	.	.	.	XBXT10g009211	2.805	2.249	X	X	X	D	ENSDARG00000089860	atxn7l1	20.974	11.853	0.875	X	.	.	.	.	.
atxn7l3	LS	gene1824	43.834	39.934	.	.	.	.	gene4319	17.163	11.995	.	.	.	.	XBXT10g003067	88.577	85.922	X	X	.	.	ENSDARG00000029331	atxn7l3	37.334	27.595	5.074	X	.	.	.	.	.
auh	S	NA	NA	NA	NA	NA	NA	NA	gene19124	25.003	12.026	.	.	.	.	XBXT10g012760	15.143	13.641	X	X	.	.	ENSDARG00000042975	auh	24.459	21.131	17.003	X	.	.	.	.	.
aup1	S	NA	NA	NA	NA	NA	NA	NA	gene13886	29.122	33.352	X	.	.	D	XBXT10g000042	47.774	36.581	X	X	X	U	ENSDARG00000092609	aup1	82.938	93.755	53.279	X	.	.	X	.	.
aurka	LS	gene6077	383.664	172.391	.	.	.	U	gene7723	285.75	174.718	.	.	.	.	XBXT10g000227	761.046	533.925	X	X	.	.	ENSDARG00000012485	aurka	548.847	400.187	166.813	X	.	X	X	.	.
aurkaip1	LS	gene2032	64.428	59.157	.	.	.	.	gene42341	37.67	36.697	.	.	.	.	XBXT10g015477	60.511	58.669	X	X	.	.	ENSDARG00000074985	aurkaip1	82.267	93.878	45.103	X	.	.	X	.	.
aurkb	LS	gene9209	238.695	161.502	.	.	.	.	gene3757	50.863	27.333	.	.	.	.	XBXT10g009076	405.32	230.551	X	X	.	.	ENSDARG00000037640	aurkb	343.85	202.766	127.668	X	.	X	X	.	.
avd.2	L	gene1597	79.547	28.553	.	.	.	U	NA	NA	NA	NA	NA	NA	NA	XBXT10g017237	56.153	26.047	X	X	.	.	ENSDARG00000087961	avd	351.947	341.497	68.409	X	.	.	.	.	.
aven	L	gene45791	13.131	10.482	.	.	D	.	NA	NA	NA	NA	NA	NA	NA	XBXT10g017523	14.043	12.787	X	X	.	.	ENSDARG00000002894	aven	79.109	79.293	22.152	X	.	.	X	.	.
avil	L	gene789	0.027	0.075	.	.	.	.	NA	NA	NA	NA	NA	NA	NA	XBXT10g001057	0.023	0.164	X	.	.	.	ENSDARG00000059342	avil	0	0	0	.	.	.	.	.	.
avl9	L	gene43167	39.838	32.72	.	.	.	.	NA	NA	NA	NA	NA	NA	NA	XBXT10g007527	48.823	52.381	X	X	.	.	ENSDARG00000055538	avl9	41.913	44.497	14.562	X	.	.	X	.	.
avp	LS	gene12182	0	0	.	.	.	.	gene18243	0	0	.	.	.	.	XBXT10g019492	0	0.582	X	.	X	D	ENSDARG00000058567	avp	0	0	0	.	.	.	.	.	.
avpi1	LS	gene7227	20.203	18.321	X	.	.	.	gene12799	39.85	35.814	.	.	.	.	XBXT10g016294	43.071	41.459	X	X	.	.	NA	NA	NA	NA	NA	NA	NA	NA	NA	NA	NA
avpr1a	LS	gene17677	0.008	0.312	.	.	.	.	gene687	0.09	0.843	X	.	.	D	XBXT10g013993	0	0	X	.	.	.	ENSDARG00000045788, ENSDARG00000077083	avpr1ab, avpr1aa	0	0	0.705	.	.	.	.	.	.
avpr1b	S	NA	NA	NA	NA	NA	NA	NA	gene41363	0	0	.	.	.	.	XBXT10g013891	0	0	X	.	.	.	ENSDARG00000045788	avpr1ab	0	0	0.482	.	.	.	.	.	.
avpr2	LS	gene17270	0.039	0	.	.	.	.	gene7934	3.598	2.395	.	.	.	D	XBXT10g010164	0	0.044	X	.	.	.	NA	NA	NA	NA	NA	NA	NA	NA	NA	NA	NA
awat1	LS	gene20227	2.002	3.405	.	.	.	.	gene210	5.721	0.048	.	.	.	.	XBXT10g001744	0.063	0	X	.	.	.	NA	NA	NA	NA	NA	NA	NA	NA	NA	NA	NA
axin1	LS	gene13005	15.473	8.696	.	.	.	.	gene16040	47.731	33.057	X	X	U	D	XBXT10g004779	15.764	15.488	X	X	X	U	ENSDARG00000102964	axin1	99.746	101.666	46.993	X	X	X	X	.	.
axin2	LS	gene50943	87.951	59.507	X	X	.	D	gene10843	79.507	54.18	X	X	U	D	XBXT10g010259	152.11	108.933	X	X	.	D	ENSDARG00000100149	axin2	42.902	22.602	33.658	X	X	X	X	.	.
axl	LS	gene44191	0.024	0.016	.	.	.	.	gene14155	0.04	0.125	.	.	.	.	XBXT10g004397	0.046	0.465	X	.	X	D	NA	NA	NA	NA	NA	NA	NA	NA	NA	NA	NA
azin1	LS	gene9627	90.929	119.246	X	X	.	D	gene12893	84.407	106.481	X	X	.	D	XBXT10g019891	276.473	336.979	X	X	X	U	ENSDARG00000035869, ENSDARG00000052789	azin1b, azin1a	212.467	216.725	156.078	X	.	X	X	.	.
azin2	S	NA	NA	NA	NA	NA	NA	NA	gene7086	24.228	50.505	X	X	D	D	XBXT10g010165	68.999	73.524	X	X	.	.	NA	NA	NA	NA	NA	NA	NA	NA	NA	NA	NA
b2m	S	NA	NA	NA	NA	NA	NA	NA	gene44697	8.242	13.898	.	.	.	.	XBXT10g016775	0.122	0.284	X	.	.	.	ENSDARG00000053136	b2m	0.255	1.238	5.922	X	.	.	.	.	.
b3galnt2	L	gene582	21.222	19.038	X	X	U	.	NA	NA	NA	NA	NA	NA	NA	XBXT10g010835	37.394	36.96	X	X	.	.	ENSDARG00000046133	b3galnt2	16.623	3.745	2.232	X	.	.	.	.	.
b3galt1	LS	gene49661	0	0	.	.	.	.	gene17548	0	0.217	.	.	.	.	XBXT10g005279	0.129	0.12	X	.	.	.	ENSDARG00000079700	b3galt1a	0.744	1.06	0.147	X	.	.	.	.	.
b3galt2l	LS	gene13987	0	0	.	.	.	.	gene7003	0	0	.	.	.	.	XBXT10g005164	0.026	0.824	X	.	.	.	ENSDARG00000102061	b3galt2	46.717	12.965	2.692	X	.	.	.	.	.
b3galt4	L	gene17649	7.744	8.258	.	.	.	.	NA	NA	NA	NA	NA	NA	NA	XBXT10g007902	46.881	51.597	X	X	X	U	NA	NA	NA	NA	NA	NA	NA	NA	NA	NA	NA
b3galt5.1	LS	gene12673	0	0.027	.	.	.	.	gene34591	0	0	.	.	.	.	XBXT10g010155	0	0	X	.	.	.	NA	NA	NA	NA	NA	NA	NA	NA	NA	NA	NA
b3galt5.2	LS	gene49657	0	0	.	.	.	.	gene44789	0	0	.	.	.	.	XBXT10g016892	0	0.188	X	.	.	.	NA	NA	NA	NA	NA	NA	NA	NA	NA	NA	NA
b3galt5l	L	gene17061	0	0.015	.	.	.	.	NA	NA	NA	NA	NA	NA	NA	XBXT10g012402	0	0	X	.	.	.	NA	NA	NA	NA	NA	NA	NA	NA	NA	NA	NA
b3galt6	LS	gene43696	25.922	11.365	.	.	.	.	gene12825	7.287	8.072	.	.	.	.	XBXT10g000486	10.055	6.788	X	X	.	.	ENSDARG00000038414	b3galt6	57.01	36.576	12.791	X	.	.	.	.	.
b3gat1	LS	gene17132	0.027	0.121	.	.	.	.	gene14446	0.124	0.151	.	.	.	.	XBXT10g000255	5.098	3.622	X	X	.	.	ENSDARG00000040547, ENSDARG00000055279	b3gat1a, b3gat1b	3.689	4.556	3.256	X	.	.	.	.	.
b3gat1l	LS	gene13421	0.328	1.394	.	.	.	.	gene18550	0.029	0.121	.	.	.	.	XBXT10g009279	3.481	2.904	X	X	.	.	ENSDARG00000055279, ENSDARG00000040547	b3gat1b, b3gat1a	3.689	4.556	3.256	X	.	.	.	.	.
b3gat2	S	NA	NA	NA	NA	NA	NA	NA	gene13398	0.085	0.191	.	.	.	.	XBXT10g001684	0.407	0.635	X	.	.	.	ENSDARG00000030733	b3gat2	0	0.102	0.213	.	.	.	.	.	.
b3gat3	L	gene17565	26.525	24.36	.	.	.	.	NA	NA	NA	NA	NA	NA	NA	XBXT10g009380	11.982	8.555	X	X	.	.	ENSDARG00000001939	b3gat3	30.558	30.237	22.639	X	.	X	X	.	.
b3glct	L	gene43078	27.206	35.487	.	.	.	.	NA	NA	NA	NA	NA	NA	NA	XBXT10g018188	13.062	16.535	X	X	.	.	NA	NA	NA	NA	NA	NA	NA	NA	NA	NA	NA
b3gnt2	LS	gene18368	63.753	64.724	X	X	U	D	gene34842	50.948	46.788	X	.	.	.	XBXT10g007516	89.879	102.737	X	X	X	U	NA	NA	NA	NA	NA	NA	NA	NA	NA	NA	NA
b3gnt3.1	LS	gene5620	0.006	0.018	.	.	.	.	gene48343	0.048	0	.	.	.	.	XBXT10g002979	9.944	11.138	X	X	X	.	ENSDARG00000058100	b3gnt3.4	0	0.359	3.243	X	.	.	.	.	.
b3gnt3.2	LS	gene7282	29.23	26.039	.	.	.	.	gene6078	8.877	10.982	.	.	.	.	XBXT10g019198	127.723	144.847	X	X	X	.	ENSDARG00000058100	b3gnt3.4	0	0.359	3.243	X	.	.	.	.	.
b3gnt4	LS	gene20420	38.972	31.669	.	.	.	.	gene41583	0.027	0	.	.	.	.	XBXT10g014734	21.601	15.515	X	X	.	.	NA	NA	NA	NA	NA	NA	NA	NA	NA	NA	NA
b3gnt5	LS	gene1993	93.711	112.037	.	.	.	.	gene13682	112.228	99.613	.	.	.	.	XBXT10g002657	277.901	161.966	X	X	.	.	ENSDARG00000004396, ENSDARG00000018971	b3gnt5b, b3gnt5a	96.252	82.573	194.714	X	.	.	X	.	.
b3gnt7	LS	gene7668	7.963	1.669	X	X	.	D	gene35664	57.016	51.864	.	.	.	.	XBXT10g003148	139.936	109.082	X	X	.	.	ENSDARG00000038489	b3gnt7	0.263	0.375	0.313	.	.	.	.	.	.
b3gnt9	L	gene6545	0.283	0.039	.	.	.	.	NA	NA	NA	NA	NA	NA	NA	XBXT10g010677	1.895	1.815	X	X	.	.	ENSDARG00000041616	b3gnt9	4.599	1.073	0.746	X	.	.	.	.	.
b4galnt1	LS	gene13798	1.25	12.103	.	.	.	D	gene1221	0	0.03	.	.	.	.	XBXT10g003123	0.495	0.649	X	.	.	.	ENSDARG00000077352, ENSDARG00000061520	b4galnt1b, b4galnt1a	12.652	2.64	1.937	X	.	.	.	.	.
b4galnt3	LS	gene9551	0.833	0.787	.	.	U	.	gene6915	0.673	0.17	.	.	.	.	XBXT10g016392	1.297	1.426	X	X	.	.	NA	NA	NA	NA	NA	NA	NA	NA	NA	NA	NA
b4galnt4	LS	gene454	0.019	0.019	.	.	.	.	gene14129	14.7	8.454	.	.	.	.	XBXT10g017902	13.81	17.013	X	X	.	.	NA	NA	NA	NA	NA	NA	NA	NA	NA	NA	NA
b4galt1.1	LS	gene18327	0.508	0.962	.	.	.	D	gene15237	0.073	0.259	.	.	.	.	XBXT10g007332	9.184	8.197	X	X	X	U	ENSDARG00000002634	b4galt1	0.533	0.456	31.696	X	.	.	X	.	.
b4galt1.2	LS	gene42937	0.075	0.282	.	.	.	.	gene19825	0	0.043	.	.	.	.	XBXT10g019110	0.15	0.052	X	.	.	.	ENSDARG00000002634	b4galt1	0.533	0.456	31.696	X	.	.	X	.	.
b4galt1l	LS	gene9400	0.035	0	.	.	.	.	gene9481	0.537	4.781	.	.	.	U	XBXT10g000160	5.346	5.224	.	X	NA	NA	ENSDARG00000104404	b4galt1l	105.713	76.464	57.721	X	X	X	X	.	.
b4galt2	LS	gene2767	16.995	19.077	.	.	.	.	gene14757	29.451	28.001	.	.	.	.	XBXT10g019260	7.553	7.799	X	X	.	.	NA	NA	NA	NA	NA	NA	NA	NA	NA	NA	NA
b4galt3l1	LS	gene11452	4.736	4.635	.	.	.	.	gene6141	7.22	7.905	.	.	.	.	XBXT10g005006	10.586	9.035	X	X	.	.	NA	NA	NA	NA	NA	NA	NA	NA	NA	NA	NA
b4galt3l2	LS	gene49765	70.654	79.428	.	.	.	.	gene40949	86.82	70.836	.	.	.	.	XBXT10g006307	12.289	11.379	X	X	X	.	NA	NA	NA	NA	NA	NA	NA	NA	NA	NA	NA
b4galt4	LS	gene2447	0.074	2.822	.	.	.	.	gene7916	2.722	2.468	.	.	.	.	XBXT10g019465	6.315	3.732	X	X	.	.	ENSDARG00000104042	b4galt4	14.025	9.495	21.367	X	.	.	X	.	.
b4galt5	L	gene15379	48.176	29.806	.	.	.	.	NA	NA	NA	NA	NA	NA	NA	XBXT10g013337	18.782	15.985	X	X	.	.	ENSDARG00000037815	b4galt5	1.145	0.326	0.227	X	.	.	.	.	.
b4galt6	LS	gene47928	15.25	14.652	.	.	.	.	gene12349	4.587	2.985	.	.	D	.	XBXT10g003085	15.403	18.61	X	X	.	.	ENSDARG00000010301	b4galt6	126.051	83.537	58.665	X	.	.	X	.	.
b4galt7	LS	gene8632	48.663	56.127	.	.	.	.	gene17888	30.514	24.618	.	.	.	.	XBXT10g020018	238.08	254.101	X	X	X	.	ENSDARG00000021899	b4galt7	88.077	52.105	15.605	X	.	.	X	.	.
b4gat1	L	gene6312	32.337	30.231	.	.	.	.	NA	NA	NA	NA	NA	NA	NA	XBXT10g010222	30.366	28.023	X	X	.	.	ENSDARG00000091902	b3gnt2b	102.748	81.407	202.595	X	.	X	X	X	X
b9d1	L	gene38314	39.382	41.44	.	.	.	.	NA	NA	NA	NA	NA	NA	NA	XBXT10g010228	79.646	93.971	X	X	.	.	ENSDARG00000011727	b9d1	13.642	8.555	4.171	X	.	.	.	.	.
b9d2	L	gene11265	20.135	19.742	.	.	.	.	NA	NA	NA	NA	NA	NA	NA	XBXT10g017966	36.703	33.408	.	X	NA	NA	ENSDARG00000017385	b9d2	26.281	10.666	13.507	X	.	.	.	.	.
baalc	LS	gene2903	0.056	0	.	.	.	.	gene3914	0.034	0.074	.	.	.	.	XBXT10g017506	0.032	0.044	X	.	.	.	NA	NA	NA	NA	NA	NA	NA	NA	NA	NA	NA
baat	S	NA	NA	NA	NA	NA	NA	NA	gene16119	0	0.028	.	.	.	.	XBXT10g002707	0	0	X	.	.	.	NA	NA	NA	NA	NA	NA	NA	NA	NA	NA	NA
babam1	L	gene13067	26.728	24.593	.	.	.	.	NA	NA	NA	NA	NA	NA	NA	XBXT10g002910	41.418	43.952	X	X	.	.	ENSDARG00000077526	babam1	16.249	10.527	8.783	X	.	.	.	.	.
babam2	L	gene19679	13.771	12.772	.	.	.	.	NA	NA	NA	NA	NA	NA	NA	XBXT10g003097	16.13	16.141	X	X	.	.	ENSDARG00000038863	babam2	10.779	6.995	2.867	X	.	.	.	.	.
bace1	LS	gene15921	5.027	4.047	.	.	.	.	gene7530	0.691	0.513	.	.	.	.	XBXT10g018067	1.994	2.997	X	X	.	.	ENSDARG00000101716	bace1	0	0.257	1.074	X	.	.	.	.	.
bace2	LS	gene18644	12.745	10.877	.	.	.	.	gene3029	21.471	21.712	.	.	.	.	XBXT10g018084	9.952	8.382	X	X	X	U	ENSDARG00000044781	bace2	75.968	114.676	8.725	X	.	.	.	.	.
bach1	LS	gene43405	40.245	33.843	.	.	.	.	gene1303	27.549	20.881	.	.	.	.	XBXT10g014118	18.093	20.083	X	X	.	.	ENSDARG00000002196, ENSDARG00000062553	bach1b, bach1a	9.502	6.06	2.925	X	.	.	.	.	.
bach2	LS	gene2486	1.998	8.556	.	.	.	U	gene19501	11.373	12.286	.	.	.	.	XBXT10g007296	11.256	12.456	X	X	.	.	ENSDARG00000004074, ENSDARG00000036569	bach2b, bach2a	49.57	25.966	7.987	X	.	X	X	.	.
baf-l	L	gene43934	73.159	38.422	.	.	.	.	NA	NA	NA	NA	NA	NA	NA	XBXT10g015682	219.327	192.721	X	X	.	.	NA	NA	NA	NA	NA	NA	NA	NA	NA	NA	NA
bag1	L	gene1304	18.711	3.883	.	.	.	.	NA	NA	NA	NA	NA	NA	NA	XBXT10g009088	75.26	79.027	X	X	.	.	ENSDARG00000020895	bag1	71.491	52.197	24.406	X	.	.	.	.	.
bag2	LS	gene47025	0.162	0.11	.	.	.	.	gene2440	0.093	0	.	.	.	.	XBXT10g016982	1.319	1.036	X	X	.	.	ENSDARG00000035005	bag2	0	0	0	.	.	.	.	.	.
bag3	LS	gene1519	6.024	4.205	.	.	.	.	gene1698	3.326	3.12	.	.	U	D	XBXT10g018552	0.214	0.298	X	.	.	.	ENSDARG00000039486	bag3	1.07	1.677	3.021	X	.	.	.	.	.
bag4	LS	gene2849	37.212	37.958	X	.	.	.	gene16808	48.076	47.504	X	.	.	.	XBXT10g015528	17.258	18.738	X	X	X	U	ENSDARG00000043179	bag4	67.583	55.16	9.666	X	.	.	.	.	.
bag5	LS	gene6007	2.794	5.76	.	.	.	.	gene5493	16.429	14.371	.	.	.	.	XBXT10g004640	15.476	14.736	X	X	.	.	ENSDARG00000017316	bag5	99.022	110.435	12.291	X	.	.	X	.	.
bag6	LS	gene4093	33.672	33.503	.	.	.	.	gene3297	48.423	69.386	X	.	D	.	XBXT10g018363	3.832	4.483	X	X	.	.	ENSDARG00000075892	bag6	31.47	21.099	27.841	X	.	X	X	.	.
bahcc1	LS	gene12918	3.798	15.441	.	.	.	D	gene18766	62.305	46.397	X	X	U	D	XBXT10g016469	22.074	24.028	X	X	.	.	NA	NA	NA	NA	NA	NA	NA	NA	NA	NA	NA
bahd1	L	gene3898	7.709	5.792	.	.	.	.	NA	NA	NA	NA	NA	NA	NA	XBXT10g014785	6.86	4.821	X	X	.	.	ENSDARG00000086789	bahd1	0.385	0.658	1.659	X	.	.	X	.	.
baiap2	LS	gene14404	4.035	4.204	X	X	U	D	gene1865	44.482	45.619	.	.	.	.	XBXT10g004512	27.056	27.698	X	X	.	.	NA	NA	NA	NA	NA	NA	NA	NA	NA	NA	NA
baiap2l1	LS	gene15666	48.033	42.102	.	.	.	.	gene12310	36.722	28.018	.	.	.	.	XBXT10g009534	36.067	30.683	X	X	X	D	ENSDARG00000031119, ENSDARG00000029305	baiap2l1b, baiap2l1a	210.058	191.475	46.142	X	.	.	X	.	.
baiap2l2	S	NA	NA	NA	NA	NA	NA	NA	gene16650	24.482	10.195	.	.	.	D	XBXT10g017608	0.3	0.157	X	.	.	.	ENSDARG00000060933, ENSDARG00000016483	baiap2l2b, baiap2l2a	0.386	0.385	2.869	X	.	.	.	.	.
baiap3	LS	gene15987	0.044	0.042	.	.	.	.	gene49855	0	0	.	.	.	.	XBXT10g008037	5.248	4.943	X	X	.	.	NA	NA	NA	NA	NA	NA	NA	NA	NA	NA	NA
bambi	LS	gene45945	43.387	82.009	X	X	U	D	gene20288	94.433	80.724	X	X	.	D	XBXT10g009327	423.465	453.106	X	X	X	D	ENSDARG00000099677, ENSDARG00000055381	bambib, bambia	14.719	58.342	523.583	X	X	X	X	.	X
banf1	LS	gene18792	66.562	69.723	X	.	.	.	gene8953	62.978	39.556	.	.	.	.	XBXT10g017481	266.415	265.903	X	X	X	U	ENSDARG00000037009	banf1	498.179	608.711	673.989	X	.	.	X	.	.
banp	LS	gene3011	42.755	47.333	.	.	.	.	gene39869	57.885	70.858	.	.	.	.	XBXT10g015887	161.368	181.948	X	X	.	.	ENSDARG00000017562	banp	31.171	25.105	16.768	X	.	.	X	.	.
bap1	LS	gene6209	42.656	38.643	X	.	.	.	gene18118	33.294	27.678	.	.	.	.	XBXT10g011490	119.541	131.94	X	X	X	U	ENSDARG00000063051	bap1	50.764	40.246	30.274	X	.	X	X	.	.
bard1	L	gene10521	116.422	76.678	X	.	U	.	NA	NA	NA	NA	NA	NA	NA	XBXT10g009692	164.715	133.495	X	X	.	.	ENSDARG00000076733	bard1	59.752	61.173	16.864	X	.	.	X	.	.
barhl1	LS	gene4066	0	0.078	.	.	.	.	gene43788	0	0	.	.	.	.	XBXT10g005945	0	0.156	X	.	.	.	ENSDARG00000035508, ENSDARG00000019013	barhl1a, barhl1b	0	0	0	.	.	.	.	.	.
barhl2	LS	gene12174	0	0.349	.	.	.	.	gene50665	0.451	0.508	.	.	.	.	XBXT10g003083	0.115	0.48	X	.	.	.	ENSDARG00000104361	barhl2	0	2.294	0	X	.	.	.	.	.
barx1	LS	gene7023	0.291	0.075	.	.	.	.	gene3864	0.158	0.34	.	.	.	.	XBXT10g011412	0.636	0.222	X	.	.	.	ENSDARG00000007407	barx1	1.256	0.477	0.498	X	.	.	.	.	.
barx2	LS	gene50867	0.125	0.019	.	.	.	.	gene7276	0	0.065	.	.	.	.	XBXT10g009881	0	0.45	X	.	.	.	ENSDARG00000041098	barx2	0	0	0	.	.	.	.	.	.
basp1	LS	gene7491	0.19	0.274	.	.	.	.	gene5738	0	0	.	.	.	.	XBXT10g000953	0	0	X	.	.	.	ENSDARG00000053358	basp1	0	0	0.145	.	.	.	.	.	.
batf	LS	gene2987	0	0.029	.	.	.	.	gene41221	0.054	0.049	.	.	.	.	XBXT10g010080	0	0	X	.	.	.	ENSDARG00000011818	batf	15.473	12.045	1.061	X	.	.	.	.	.
batf3	LS	gene19474	0	0	.	.	.	.	gene1967	26.084	25.367	.	.	.	.	XBXT10g015679	0	0	.	.	NA	NA	ENSDARG00000042577	batf3	23.412	19.068	5.966	X	.	.	.	.	.
bax	LS	gene49837	103.751	107.192	.	.	.	.	gene16437	144.611	121.965	X	X	U	D	XBXT10g017146	159.994	203.072	.	X	NA	NA	ENSDARG00000089129, ENSDARG00000030881, ENSDARG00000020623	baxa, baxb, baxa	104.142	88.12	53.883	X	.	.	X	.	.
baz1a	LS	gene9976	99.098	103.406	.	.	.	.	gene12251	44.614	60.578	.	.	.	.	XBXT10g007341	90.654	92.366	X	X	.	.	ENSDARG00000099745, ENSDARG00000063233	baz1a, baz1a	209.58	111.885	26.227	X	.	.	X	.	.
baz1b	LS	gene8976	141.751	115.689	X	.	.	.	gene40207	184.422	158.929	X	.	.	.	XBXT10g011852	164.329	178.34	X	X	X	U	ENSDARG00000102832	baz1b	135.1	108.798	76.604	X	X	X	X	.	.
baz2a	L	gene11235	126.814	128.092	X	X	.	D	NA	NA	NA	NA	NA	NA	NA	XBXT10g004173	43.025	59.223	X	X	.	.	ENSDARG00000102974	baz2a	173.674	100.202	78.809	X	.	X	X	.	X
baz2b	LS	gene37033	3.388	7.328	.	.	.	D	gene16572	10.323	1.212	.	.	.	.	XBXT10g016362	2.151	1.472	X	X	.	.	NA	NA	NA	NA	NA	NA	NA	NA	NA	NA	NA
bbip1	L	gene13792	2.823	4.076	.	.	.	.	NA	NA	NA	NA	NA	NA	NA	XBXT10g024527	9.837	4.577	X	X	X	.	ENSDARG00000071046	bbip1	103.221	22.313	29.151	X	.	.	.	.	.
bbof1	L	gene8081	0.119	0.925	.	.	.	.	NA	NA	NA	NA	NA	NA	NA	XBXT10g005703	0.039	0	X	.	.	.	NA	NA	NA	NA	NA	NA	NA	NA	NA	NA	NA
bbox1	S	NA	NA	NA	NA	NA	NA	NA	gene10947	5.018	0.325	.	.	.	D	XBXT10g008144	0.089	0.041	X	.	.	.	ENSDARG00000036135	bbox1	9.104	8.665	1.927	X	.	.	.	.	.
bbs1	L	gene49454	14.08	12.21	.	.	.	.	NA	NA	NA	NA	NA	NA	NA	XBXT10g001203	19.558	14.332	X	X	.	.	ENSDARG00000075169	bbs1	5.079	5.603	3.545	X	.	.	X	.	.
bbs10	L	gene18193	17.302	20.293	.	.	.	.	NA	NA	NA	NA	NA	NA	NA	XBXT10g010914	66.991	64.6	X	X	X	U	ENSDARG00000069515	bbs10	1.369	0.936	2.279	X	.	.	.	.	.
bbs12	L	gene9141	26.894	14.844	.	.	.	.	NA	NA	NA	NA	NA	NA	NA	XBXT10g018845	14.1	12.867	X	X	.	.	ENSDARG00000016112	bbs12	4.393	2.732	0.772	X	.	.	.	.	.
bbs2	S	NA	NA	NA	NA	NA	NA	NA	gene1669	47.216	40.37	.	.	.	.	XBXT10g004676	71.979	55.263	X	X	.	.	ENSDARG00000041621	bbs2	18.114	9.93	1.933	X	.	.	.	.	.
bbs4	S	NA	NA	NA	NA	NA	NA	NA	gene7188	1.331	0.898	.	.	.	.	XBXT10g003919	31.473	26.301	X	X	.	.	ENSDARG00000063522	bbs4	11.129	9.95	4.211	X	.	.	.	.	.
bbs5	L	gene14713	39.344	29.41	.	.	.	.	NA	NA	NA	NA	NA	NA	NA	XBXT10g018044	49.683	49.903	X	X	.	.	ENSDARG00000039827	bbs5	15.649	4.575	4.533	X	.	.	.	.	.
bbs7	L	gene8491	24.392	19.432	.	.	.	.	NA	NA	NA	NA	NA	NA	NA	XBXT10g002954	66.014	50.162	X	X	.	.	ENSDARG00000059911	bbs7	14.825	9.959	1.686	X	.	.	.	.	.
bbs9	L	gene3631	20.227	19.301	.	.	.	.	NA	NA	NA	NA	NA	NA	NA	XBXT10g007929	31.278	31.413	X	X	.	.	NA	NA	NA	NA	NA	NA	NA	NA	NA	NA	NA
bbx	LS	gene9251	28.422	16.616	.	.	.	.	gene48814	7.088	1.06	.	.	.	.	XBXT10g013162	3.171	3.612	X	X	.	.	NA	NA	NA	NA	NA	NA	NA	NA	NA	NA	NA
bc014685	S	NA	NA	NA	NA	NA	NA	NA	gene8907	27.471	29.793	.	.	.	.	XBXT10g018892	29.058	39.196	X	X	.	.	NA	NA	NA	NA	NA	NA	NA	NA	NA	NA	NA
bcam	LS	gene2137	0.643	0.45	.	.	.	.	gene36375	2.942	4.536	.	.	.	D	XBXT10g019673	0.228	0.179	X	.	.	.	ENSDARG00000090190	bcam	0	0.077	0.481	.	.	.	.	.	.
bcan	LS	gene44491	0	0	.	.	.	.	gene46499	0	0.039	.	.	.	.	XBXT10g004260	0	0	X	.	.	.	ENSDARG00000099412	bcan	3.682	2.84	0.579	X	.	.	.	.	.
bcap29	LS	gene2274	20.779	17.444	.	.	.	.	gene11433	10.08	9.471	.	.	.	.	XBXT10g005898	21.429	23.111	X	X	.	.	ENSDARG00000016231	bcap29	24.879	41.089	19.958	X	.	.	.	.	.
bcap31	L	gene5630	53.361	61.787	.	.	.	.	NA	NA	NA	NA	NA	NA	NA	XBXT10g014554	132.171	112.136	X	X	.	.	ENSDARG00000044972	bcap31	114.034	106.261	71.637	X	.	.	X	.	.
bcar1	LS	gene16792	3.846	1.142	.	.	.	D	gene13249	0.025	0.089	.	.	.	.	XBXT10g003747	8.587	9.91	X	X	.	.	ENSDARG00000056525	bcar1	0	0.157	1.701	X	.	.	X	.	.
bcar3	LS	gene5828	90.318	92.295	.	.	.	.	gene2474	14.651	5.659	.	.	.	.	XBXT10g005444	96.467	73.518	X	X	.	.	NA	NA	NA	NA	NA	NA	NA	NA	NA	NA	NA
bcas2	L	gene18896	101.366	104.988	X	.	.	.	NA	NA	NA	NA	NA	NA	NA	XBXT10g013140	216.493	244.564	X	X	.	.	ENSDARG00000043631	bcas2	184.997	165.433	206.194	X	.	.	.	.	.
bcas3	L	gene41034	7.593	8.026	.	.	.	.	NA	NA	NA	NA	NA	NA	NA	XBXT10g016686	7.929	10.653	X	X	X	.	ENSDARG00000090764	bcas3	32.123	25.256	16.602	X	.	.	.	.	.
bcas4	L	gene45297	0.068	0.094	.	.	.	.	NA	NA	NA	NA	NA	NA	NA	XBXT10g009897	0.993	2.396	X	X	.	.	NA	NA	NA	NA	NA	NA	NA	NA	NA	NA	NA
bcat1	LS	gene16335	3.648	3.258	.	.	.	.	gene47519	0	0	.	.	.	.	XBXT10g015599	0	0	X	.	.	.	ENSDARG00000045568	bcat1	3.257	0.232	0	X	.	.	.	.	.
bcat2	L	gene14344	18.31	16.991	.	.	.	.	NA	NA	NA	NA	NA	NA	NA	XBXT10g018524	23.379	22.984	X	X	.	.	ENSDARG00000054849	bcat2	114.345	136.059	71.761	X	.	.	X	.	.
bccip	LS	gene5964	27.925	16.806	.	.	.	.	gene19353	42.351	37.491	.	.	.	.	XBXT10g003284	76.362	80.626	X	X	.	.	ENSDARG00000004948	bccip	11.806	7.177	16.153	X	.	.	.	.	.
bcdin3d	L	gene8451	40.656	40.353	.	.	.	.	NA	NA	NA	NA	NA	NA	NA	XBXT10g003462	80.544	69.515	X	X	X	.	NA	NA	NA	NA	NA	NA	NA	NA	NA	NA	NA
bche	LS	gene9296	0	0.03	.	.	.	.	gene47503	0	0	.	.	.	.	XBXT10g013005	0.093	0.226	X	.	.	.	NA	NA	NA	NA	NA	NA	NA	NA	NA	NA	NA
bckdha	LS	gene14100	23.211	19.289	.	.	.	.	gene46572	0.197	0.149	.	.	.	.	XBXT10g008791	35.507	36.125	X	X	.	.	ENSDARG00000040555	bckdha	123.377	61.187	69.897	X	.	.	.	.	.
bckdhb	LS	gene7805	11.906	8.379	.	.	.	.	gene9170	15.877	19.935	.	.	.	.	XBXT10g007646	111.79	68.263	X	X	.	.	ENSDARG00000014676	bckdhb	65.952	47.584	25.078	X	.	.	.	.	.
bckdk	LS	gene47042	58.397	62.41	.	.	.	.	gene16111	52.032	49.015	.	.	.	.	XBXT10g013621	22.991	25.271	X	X	.	.	ENSDARG00000016904	bckdk	182.924	222.926	221.289	X	X	X	X	.	.
bcl10	LS	gene12906	0	0	.	.	.	.	gene17528	0	0	.	.	.	.	XBXT10g008176	0	0	X	.	.	.	NA	NA	NA	NA	NA	NA	NA	NA	NA	NA	NA
bcl11a	L	gene20293	9.81	8.517	.	.	.	.	NA	NA	NA	NA	NA	NA	NA	XBXT10g010735	1.942	1.75	X	X	.	.	ENSDARG00000061352, ENSDARG00000063153	bcl11aa, bcl11ab	0.358	0.845	0.106	.	.	.	.	.	.
bcl11b	LS	gene4330	0.074	0.088	.	.	.	.	gene6829	12.284	11.022	.	.	.	.	XBXT10g016034	0	0.095	X	.	.	.	NA	NA	NA	NA	NA	NA	NA	NA	NA	NA	NA
bcl2	LS	gene8787	0	0.032	.	.	.	.	gene47260	1.949	0.382	.	.	.	.	XBXT10g015045	1.12	2.011	X	X	.	.	ENSDARG00000094704, ENSDARG00000089109	bcl2a, bcl2b	11.79	7.749	0.584	X	.	.	.	.	.
bcl2l1	S	NA	NA	NA	NA	NA	NA	NA	gene36966	3.161	3.151	.	.	U	.	XBXT10g015993	37.086	21.628	.	X	NA	NA	ENSDARG00000008434	bcl2l1	98.6	51.245	37.733	X	.	X	X	.	.
bcl2l10	LS	gene19323	0.195	0.657	X	.	.	.	gene13326	0.267	0.451	.	.	.	.	XBXT10g003092	0.248	0.148	X	.	.	.	ENSDARG00000026766	bcl2l10	429.594	319.815	379.96	X	X	X	X	.	.
bcl2l11	LS	gene19178	16.913	18.519	X	X	U	D	gene9855	13.616	5.246	X	X	U	D	XBXT10g013663	1.918	2.024	X	X	X	U	ENSDARG00000079144	bcl2l11	0	2.25	2.681	X	.	.	.	.	.
bcl2l12	LS	gene1586	66.086	62.216	X	X	D	.	gene39304	54.214	62.592	X	X	D	.	XBXT10g001162	44.726	58.259	X	X	X	D	NA	NA	NA	NA	NA	NA	NA	NA	NA	NA	NA
bcl2l13	L	gene8176	58.577	47.551	.	.	.	.	NA	NA	NA	NA	NA	NA	NA	XBXT10g013543	80.997	60.601	.	X	NA	NA	ENSDARG00000062370	bcl2l13	59.13	39.128	12.029	X	.	.	.	.	.
bcl2l14	S	NA	NA	NA	NA	NA	NA	NA	gene18426	42.328	25.166	.	.	.	.	XBXT10g017679	67.087	56.142	X	X	.	.	NA	NA	NA	NA	NA	NA	NA	NA	NA	NA	NA
bcl2l2	LS	gene10269	25.493	20.745	X	.	.	.	gene144	19.25	16.797	.	.	.	.	XBXT10g019823	94.571	67.917	X	X	.	.	NA	NA	NA	NA	NA	NA	NA	NA	NA	NA	NA
bcl3	LS	gene10318	0.107	0	.	.	.	.	gene47610	0	0	.	.	.	.	XBXT10g015196	0	0	X	.	.	.	ENSDARG00000087832	bcl3	0.547	0.351	1.22	X	.	.	.	.	.
bcl6	LS	gene6506	58.494	72.583	.	.	.	.	gene8381	32.431	35.479	.	.	.	.	XBXT10g009775	84.872	52.6	X	X	.	.	ENSDARG00000070864	bcl6aa	2.846	1.106	3.23	X	.	.	.	.	.
bcl7a	LS	gene3924	21.031	24.544	X	.	U	.	gene8328	72.152	78.875	X	X	D	.	XBXT10g015558	189.977	153.642	X	X	X	U	ENSDARG00000052907	bcl7a	62.113	42.312	125.354	X	.	.	X	.	.
bcl7b	LS	gene40186	5.032	8.855	.	.	.	.	gene48575	6.767	3.333	.	.	.	.	XBXT10g005283	13.882	9.392	X	X	.	.	ENSDARG00000111877, ENSDARG00000040396	bcl7ba, bcl7bb	85.192	91.271	51.459	X	.	.	.	.	.
bcl7c	L	gene9874	0.293	0	.	.	.	.	NA	NA	NA	NA	NA	NA	NA	XBXT10g018637	0.086	1.677	X	X	X	D	NA	NA	NA	NA	NA	NA	NA	NA	NA	NA	NA
bcl9	LS	gene38786	109.527	93.432	.	.	U	.	gene10447	73.202	60.176	X	X	U	D	XBXT10g004685	8.091	8.586	X	X	X	U	NA	NA	NA	NA	NA	NA	NA	NA	NA	NA	NA
bcl9l	LS	gene17650	5.303	5.908	X	.	.	.	gene123	23.16	25.565	.	.	.	.	XBXT10g003320	5.897	5.47	X	X	.	.	ENSDARG00000055054	bcl9l	11.624	3.609	0.479	X	.	.	.	.	.
bclaf1	S	NA	NA	NA	NA	NA	NA	NA	gene13732	55.073	36.344	.	.	.	.	XBXT10g005946	90.871	111.657	X	X	.	.	NA	NA	NA	NA	NA	NA	NA	NA	NA	NA	NA
bclaf3	LS	gene38925	29.073	24.559	.	.	.	.	gene39909	44.224	31.842	.	.	.	.	XBXT10g003526	57.319	72.086	X	X	.	.	NA	NA	NA	NA	NA	NA	NA	NA	NA	NA	NA
bco1	L	gene37480	0.09	0.074	.	.	.	.	NA	NA	NA	NA	NA	NA	NA	XBXT10g014358	0.111	2.637	X	X	X	.	ENSDARG00000104256	bco1	4.662	1.251	3.587	X	.	.	.	.	.
bco2	L	gene8627	8.789	10.06	.	.	.	U	NA	NA	NA	NA	NA	NA	NA	XBXT10g009224	5.351	6.697	X	X	.	.	ENSDARG00000041715, ENSDARG00000055722	bco2b, bco2a	0.794	6.246	0.751	X	.	.	.	.	.
bco2l	L	gene39000	0	0	.	.	.	.	NA	NA	NA	NA	NA	NA	NA	XBXT10g002756	0.09	0.345	X	.	.	.	ENSDARG00000027620	bco2l	1.679	0.399	3.493	X	.	.	.	.	.
bcor	LS	gene40017	79.821	75.401	X	X	U	D	gene5990	37.997	33.539	X	X	U	D	XBXT10g009084	97.161	121.921	X	X	X	U	ENSDARG00000017798	bcor	44.982	15.838	6.389	X	.	.	X	.	.
bcorl1	LS	gene11224	5.508	5.461	X	X	.	D	gene18761	10.616	13.528	X	X	U	D	XBXT10g003200	12.582	15.316	X	X	X	U	NA	NA	NA	NA	NA	NA	NA	NA	NA	NA	NA
bcr	LS	gene36321	8.981	7.628	.	.	.	.	gene43742	3.945	6.24	.	.	.	.	XBXT10g014097	53.323	56.639	X	X	X	D	ENSDARG00000079286	bcr	3.764	1.248	0.312	X	.	.	.	.	.
bcs1l	L	gene11063	11.644	3.507	.	.	.	.	NA	NA	NA	NA	NA	NA	NA	XBXT10g019415	93.36	63.389	X	X	.	.	ENSDARG00000012295	bcs1l	40.642	35.361	2.101	X	.	.	.	.	.
bdh1a	S	NA	NA	NA	NA	NA	NA	NA	gene7021	49.379	27.392	.	.	.	D	XBXT10g014929	3.796	3.589	X	X	.	.	ENSDARG00000059388	bdh1	7.969	6.247	1.481	X	.	.	.	.	.
bdh2	L	gene19599	16.283	14.611	.	.	.	.	NA	NA	NA	NA	NA	NA	NA	XBXT10g017605	17.29	22.977	X	X	.	.	ENSDARG00000052696	bdh2	0	0	0	.	.	.	.	.	.
bdkrb2	LS	gene13598	0.186	0.795	.	.	.	.	gene15988	0.317	0.043	.	.	.	.	XBXT10g007255	0.547	0.398	X	.	.	.	NA	NA	NA	NA	NA	NA	NA	NA	NA	NA	NA
bdnf	LS	gene4716	0	0	.	.	.	.	gene13830	0.181	0.186	.	.	.	.	XBXT10g007424	0	0	X	.	.	.	ENSDARG00000018817	bdnf	0.199	2.494	0.828	X	.	.	.	.	.
bdp1	LS	gene2884	26.406	31.012	.	.	.	.	gene17549	59.909	57.132	.	.	.	.	XBXT10g004856	23.719	29.547	X	X	.	.	NA	NA	NA	NA	NA	NA	NA	NA	NA	NA	NA
becn1	L	gene35225	11.274	9.194	.	.	.	.	NA	NA	NA	NA	NA	NA	NA	XBXT10g010571	38.891	30.505	X	X	.	.	ENSDARG00000079128	becn1	51.749	42.135	6.633	X	.	.	X	.	.
begain	L	gene14827	1.257	0.682	.	.	.	.	NA	NA	NA	NA	NA	NA	NA	XBXT10g000790	8.075	9.197	X	X	.	.	NA	NA	NA	NA	NA	NA	NA	NA	NA	NA	NA
bend3	LS	gene10630	3.405	3.685	X	.	.	D	gene12931	1.182	1.789	.	.	.	.	XBXT10g010442	7.492	10.76	X	X	X	.	ENSDARG00000076903	bend3	2.294	1.716	1.108	X	.	.	.	.	.
bend4	LS	gene11964	5.774	0.386	.	.	.	.	gene17283	18.014	5.432	.	.	.	.	XBXT10g017053	4.257	4.686	X	X	.	.	NA	NA	NA	NA	NA	NA	NA	NA	NA	NA	NA
bend5	S	NA	NA	NA	NA	NA	NA	NA	gene18113	13.091	14.517	.	.	.	.	XBXT10g007731	47.136	49.686	X	X	.	.	ENSDARG00000075624	bend5	15.407	22.211	6.543	X	.	.	X	.	.
bend7	LS	gene40488	0.777	0.426	.	.	.	U	gene12393	0.638	0.686	.	.	.	.	XBXT10g013212	0	0.219	X	.	.	.	NA	NA	NA	NA	NA	NA	NA	NA	NA	NA	NA
best1	LS	gene4215	0.024	0.032	.	.	.	.	gene13195	0	0	.	.	.	.	XBXT10g011105	0.035	0.145	X	.	.	.	NA	NA	NA	NA	NA	NA	NA	NA	NA	NA	NA
best2	LS	gene11635	33.94	45.28	.	.	.	.	gene8173	13.134	21.322	.	.	.	.	XBXT10g002407	27.203	30.584	X	X	X	.	ENSDARG00000079163	best2	0	0.119	0	.	.	.	.	.	.
best3	LS	gene16273	0.035	0.048	.	.	.	.	gene40998	0.2	0.18	.	.	.	.	XBXT10g008910	0.951	1.123	X	X	.	.	NA	NA	NA	NA	NA	NA	NA	NA	NA	NA	NA
best4	LS	gene38587	0	0	.	.	.	.	gene34773	0	0	.	.	.	.	XBXT10g019180	0	0.087	X	.	.	.	ENSDARG00000078455	best4	0	0	0	.	.	.	.	.	.
bet1	LS	gene2984	17.956	30.021	.	.	.	.	gene3644	44.496	28.435	.	.	.	.	XBXT10g010367	17.539	13.3	X	X	.	.	ENSDARG00000034885	bet1	100.04	40.771	13.941	X	.	.	.	.	.
bet1l	S	NA	NA	NA	NA	NA	NA	NA	gene10413	7.802	11.014	.	.	.	.	XBXT10g008678	43.044	31.719	X	X	.	.	ENSDARG00000032037	bet1l	52.043	38.88	18.566	X	.	.	.	.	.
bfar	L	gene48866	0	0	.	.	.	.	NA	NA	NA	NA	NA	NA	NA	XBXT10g004916	187.024	215.765	X	X	.	.	NA	NA	NA	NA	NA	NA	NA	NA	NA	NA	NA
bfsp1	L	gene14325	0.094	0.683	.	.	.	D	NA	NA	NA	NA	NA	NA	NA	XBXT10g018215	0.031	0	X	.	.	.	NA	NA	NA	NA	NA	NA	NA	NA	NA	NA	NA
bfsp2	LS	gene43068	0	0	.	.	.	.	gene46219	0	0.064	.	.	.	.	XBXT10g015935	0	0	X	.	.	.	ENSDARG00000011998	bfsp2	0	0	0	.	.	.	.	.	.
bglap	S	NA	NA	NA	NA	NA	NA	NA	gene6289	0	0	.	.	.	.	XBXT10g011077	0.27	0.527	X	.	.	.	ENSDARG00000058414	bglap	0	0	0	.	.	.	.	.	.
bglap2	S	NA	NA	NA	NA	NA	NA	NA	gene7370	0.01	0.029	.	.	.	.	XBXT10g006389	0.04	0.055	X	.	.	.	NA	NA	NA	NA	NA	NA	NA	NA	NA	NA	NA
bgn	LS	gene37085	0	0.06	.	.	.	.	gene5723	0	0	.	.	.	.	XBXT10g012551	0	0	X	.	.	.	ENSDARG00000002945, ENSDARG00000017884	bgnb, bgna	4.313	5.138	1.268	X	.	.	.	.	.
bhlha15	LS	gene18351	0.029	0	.	.	.	.	gene13119	0.047	0.193	.	.	.	.	XBXT10g013746	0.078	0.218	X	.	.	.	ENSDARG00000045166	bhlha15	0.565	0	0.672	.	.	.	.	.	.
bhlha9	LS	gene50435	0	0	.	.	.	.	gene3601	0	0	.	.	.	.	XBXT10g013414	0	0	X	.	.	.	ENSDARG00000103981	bhlha9	0	0	0	.	.	.	.	.	.
bhlhe22	LS	gene8407	0.035	0.451	.	.	.	.	gene1972	0.245	0.581	.	.	.	.	XBXT10g000111	0	0.808	X	.	X	U	ENSDARG00000058039	bhlhe22	0	0	0	.	.	.	.	.	.
bhlhe40	LS	gene42431	2.635	2.767	.	.	.	.	gene18780	0.281	0.669	.	.	.	.	XBXT10g012224	1.448	0.874	X	X	.	.	ENSDARG00000004060	bhlhe40	0	0.061	0	.	.	.	.	.	.
bhmt	L	gene16735	2.879	0.345	.	.	.	U	NA	NA	NA	NA	NA	NA	NA	XBXT10g011425	6.365	3.554	X	X	.	.	ENSDARG00000013430	bhmt	0.316	0.27	29.678	X	.	.	X	.	.
bicc1	LS	gene2612	117.187	96.404	.	.	.	.	gene3384	90.637	81.357	.	.	.	.	XBXT10g000950	58.924	71.588	X	X	.	.	ENSDARG00000070497, ENSDARG00000061682	bicc1b, bicc1a	42.823	24.324	1.132	X	.	.	.	.	.
bicd2	LS	gene7788	17.824	13.938	.	.	.	.	gene1269	21.692	15.81	X	X	U	D	XBXT10g001877	11.15	10.348	X	X	X	U	ENSDARG00000075571	bicd2	14.647	17.709	8.809	X	.	.	X	.	.
bicd2l	L	gene1448	118.471	98.979	.	.	.	.	NA	NA	NA	NA	NA	NA	NA	XBXT10g012561	217.351	196.472	X	X	.	.	ENSDARG00000075571	bicd2	14.647	17.709	8.809	X	.	.	X	.	.
bicdl1	LS	gene5516	19.157	14.747	.	.	.	.	gene1758	6.873	5.455	.	.	.	.	XBXT10g001439	3.65	4.053	X	X	.	.	NA	NA	NA	NA	NA	NA	NA	NA	NA	NA	NA
bicdl2	LS	gene404	0.137	0	.	.	.	.	gene8973	0	0	.	.	.	.	XBXT10g018732	0.215	0.33	X	.	.	.	ENSDARG00000091669	bicdl2l	0.414	1.887	55.102	X	.	.	X	.	.
bicra	LS	gene8348	46.734	35.143	.	.	.	.	gene5503	58.9	48.573	X	.	.	.	XBXT10g008475	6.396	9.953	X	X	.	.	ENSDARG00000061159	bicra	33.569	15.788	6.058	X	.	.	.	.	.
bicral	LS	gene11039	0.694	0.486	.	.	.	.	gene17060	0.559	0.629	.	.	.	.	XBXT10g000696	2.168	2.079	X	X	.	.	ENSDARG00000016089	bicral	0	0.63	5.764	X	.	.	X	.	.
bid	LS	gene1193	1.011	1.958	.	.	.	D	gene40607	13.187	4.814	.	.	.	.	XBXT10g011304	26.189	15.773	.	X	NA	NA	ENSDARG00000069290	bida	16.278	14.849	15.27	X	.	.	.	.	.
bin1	LS	gene14764	0.13	0.281	.	.	.	.	gene4425	21.55	21.903	.	.	.	.	XBXT10g008052	10.68	9.701	X	X	.	.	ENSDARG00000058820	bin1b	65.414	37.699	9.3	X	.	.	.	.	.
bin2	LS	gene37535	0.185	0.232	.	.	.	.	gene39470	0	0	.	.	.	.	XBXT10g014048	0.03	0.084	X	.	.	.	ENSDARG00000003219, ENSDARG00000010255	bin2a, bin2b	54.889	30.691	16.625	X	.	X	X	.	.
bin3	LS	gene35443	10.048	11.585	.	.	.	U	gene16522	15.279	12.66	.	.	.	U	XBXT10g000803	15.59	20.641	X	X	X	U	ENSDARG00000099651	bin3	34.66	45.937	45.244	X	.	.	X	.	.
birc2	LS	gene13981	36.1	28.181	X	X	U	D	gene11710	3.37	6.172	X	X	.	D	XBXT10g018729	5.352	32.997	X	X	X	D	ENSDARG00000044619	birc2	1.734	2.581	18.21	X	.	.	X	.	.
birc5	LS	gene2607	186.298	132.977	.	.	.	.	gene1878	326.062	197.078	.	.	.	.	XBXT10g001862	733.499	650.75	X	X	.	.	ENSDARG00000075621, ENSDARG00000055655	birc5a, birc5b	638.736	303.735	94.154	X	.	.	X	.	.
birc5l	LS	gene17619	145.558	120.258	X	.	.	.	gene7185	166.942	179.609	.	.	.	.	XBXT10g009032	331.269	312.2	X	X	X	U	ENSDARG00000075621	birc5a	157.097	87.709	86.144	X	.	.	X	.	.
birc6	LS	gene35046	38.292	37.814	.	.	.	.	gene2350	52.994	52.807	.	.	.	.	XBXT10g011090	28.891	35.371	X	X	.	.	ENSDARG00000074166	birc6	38.536	20.553	14.468	X	.	.	X	.	.
birc7	LS	gene7521	90.893	45.778	.	.	.	.	gene9511	339.004	130.388	.	.	.	.	XBXT10g010349	224.103	118.159	X	X	.	.	ENSDARG00000058082	birc7	0	0.321	3.014	X	.	.	.	.	.
bivm	L	gene13225	18.253	17.265	.	.	.	.	NA	NA	NA	NA	NA	NA	NA	XBXT10g015811	0.171	0.143	X	.	.	.	ENSDARG00000061409	bivm	28.611	19.995	1.097	X	.	.	.	.	.
bix1.1	LS	gene6547	0	24.278	X	X	.	D	gene1452	0	20.535	X	X	.	D	XBXT10g009150	0	9.079	X	X	.	.	NA	NA	NA	NA	NA	NA	NA	NA	NA	NA	NA
bix1.2	LS	gene11289	0	40.308	X	X	U	D	gene41366	0	46.705	X	X	U	.	XBXT10g003895	0	16.706	X	X	X	U	NA	NA	NA	NA	NA	NA	NA	NA	NA	NA	NA
blcap	LS	gene34723	43.548	23.569	.	.	.	.	gene17667	88.581	104.603	.	.	.	.	XBXT10g005597	38.022	32.764	.	X	NA	NA	ENSDARG00000052073	blcap	283.354	326.847	178.161	X	.	.	.	.	.
blk	L	gene37324	0	0	.	.	.	.	NA	NA	NA	NA	NA	NA	NA	XBXT10g012389	0.184	0.598	X	.	.	.	ENSDARG00000007783	blk	2.353	0.708	0	X	.	.	.	.	.
blm	LS	gene13216	76.599	79.41	.	.	.	.	gene15667	65.224	49.105	.	.	.	.	XBXT10g002903	69.569	36.741	X	X	.	.	ENSDARG00000077089	blm	148.978	64.968	31.423	X	.	X	X	.	.
blmh	LS	gene7369	75.312	78.385	.	.	.	.	gene44799	36.392	48.467	.	.	.	.	XBXT10g000513	120.807	145.331	X	X	.	.	ENSDARG00000025977	blmh	33.409	36.224	37.776	X	.	.	X	.	.
blnk	LS	gene51022	43.186	58.295	.	.	.	.	gene12129	2.197	3.406	.	.	.	D	XBXT10g000021	42.993	30.992	X	X	.	.	ENSDARG00000042722	blnk	0	0	0.202	.	.	.	.	.	.
bloc1s1	S	NA	NA	NA	NA	NA	NA	NA	gene49344	123.119	82.568	X	.	.	.	XBXT10g014088	33.622	15.546	X	X	.	.	NA	NA	NA	NA	NA	NA	NA	NA	NA	NA	NA
bloc1s2	LS	gene12002	36.702	10.913	.	.	.	.	gene35598	71.418	17.13	.	.	.	.	XBXT10g013611	37.053	38.847	X	X	X	D	ENSDARG00000046081	bloc1s2	9.988	7.872	1.397	X	.	.	.	.	.
bloc1s4	L	gene1607	31.232	27.426	.	.	.	.	NA	NA	NA	NA	NA	NA	NA	XBXT10g001682	188.437	214.153	X	X	.	.	ENSDARG00000007597	bloc1s4	32.103	30.793	24.246	X	.	.	.	.	.
bloc1s5	L	gene20067	34.418	31.983	.	.	.	.	NA	NA	NA	NA	NA	NA	NA	XBXT10g005261	52.319	62.959	X	X	.	.	ENSDARG00000111747	bloc1s5	2.257	1.537	2.907	X	.	.	.	.	.
bloc1s6	S	NA	NA	NA	NA	NA	NA	NA	gene44675	109.339	98.152	.	.	.	.	XBXT10g016369	169.166	108.702	X	X	.	.	ENSDARG00000042933	bloc1s6	51.61	32.759	8.592	X	.	.	.	.	.
blvra	LS	gene4427	0.883	0.83	.	.	.	.	gene19452	0	0	.	.	.	.	XBXT10g018048	53.769	46.337	X	X	.	.	ENSDARG00000059857	blvra	23.541	18.149	8.907	X	.	.	.	.	.
blvrb	L	gene12686	0.445	1.005	.	.	.	.	NA	NA	NA	NA	NA	NA	NA	XBXT10g006440	5.03	5.292	X	X	.	.	ENSDARG00000096829	blvrb	96.713	47.697	45.798	X	.	.	.	.	.
blzf1	LS	gene11682	71.77	46.09	X	.	.	.	gene16651	100.758	139.237	X	.	.	.	XBXT10g000294	129.572	126.033	X	X	X	.	ENSDARG00000011299	blzf1	130.199	179.239	168.737	X	.	X	X	.	.
bmerb1	LS	gene40962	0	0	.	.	.	.	gene1883	0	0.047	.	.	.	.	XBXT10g010501	0.023	0.032	X	.	.	.	NA	NA	NA	NA	NA	NA	NA	NA	NA	NA	NA
bmerb1l	LS	gene6863	1.092	0.392	.	.	.	.	gene2806	0.107	0.072	.	.	.	.	XBXT10g019046	6.199	1.697	X	X	.	.	NA	NA	NA	NA	NA	NA	NA	NA	NA	NA	NA
bmf	LS	gene18872	0.855	0.285	.	.	.	D	gene44189	9.715	2.381	.	.	.	.	XBXT10g007093	23.841	28.409	X	X	.	.	NA	NA	NA	NA	NA	NA	NA	NA	NA	NA	NA
bmi1	LS	gene16629	14.681	4.785	.	.	.	D	gene17976	51.54	38.816	X	X	.	D	XBXT10g006203	34.607	26.858	X	X	X	.	ENSDARG00000013076, ENSDARG00000006010	bmi1b, bmi1a	329.551	223.855	8.319	X	.	.	.	.	.
bmp1	LS	gene45271	9.557	15.96	.	.	.	.	gene15366	13.894	12.926	.	.	.	.	XBXT10g012337	14.415	18.778	X	X	.	.	ENSDARG00000028053, ENSDARG00000028071	bmp1b, bmp1a	38.351	37.451	28.898	X	.	.	X	.	.
bmp10	LS	gene34631	0.068	0.031	.	.	.	.	gene36802	0	0	.	.	.	.	XBXT10g006678	0	0	X	.	.	.	NA	NA	NA	NA	NA	NA	NA	NA	NA	NA	NA
bmp15	LS	gene3839	61.644	43.126	.	.	.	.	gene11484	0	0	.	.	.	.	XBXT10g009468	114.618	67.412	X	X	.	.	ENSDARG00000037491	bmp15	162.419	87.22	4.093	X	.	.	.	.	.
bmp2	LS	gene3881	51.865	44.741	X	.	.	.	gene6864	83.782	57.547	X	X	U	D	XBXT10g003447	215.881	168.444	X	X	X	U	ENSDARG00000041430, ENSDARG00000013409	bmp2b, bmp2a	0	61.438	91.664	X	X	X	X	.	X
bmp3	LS	gene40336	0.086	0.026	.	.	.	.	gene9704	0	0.131	X	X	.	D	XBXT10g015525	3.091	3.589	X	X	.	.	ENSDARG00000060526	bmp3	0	0	0.222	.	.	.	.	.	.
bmp4	LS	gene5642	0.668	6.02	X	X	D	D	gene6459	1.345	12.673	X	X	D	D	XBXT10g009332	0.399	37.818	X	X	X	D	ENSDARG00000019995	bmp4	1.001	0.856	67.12	X	.	.	X	.	.
bmp5	LS	gene42123	0	0	.	.	.	.	gene47263	0	0	.	.	.	.	XBXT10g004327	0	0.081	X	.	.	.	ENSDARG00000101701	bmp5	0	0.077	0	.	.	.	.	.	.
bmp6	LS	gene7951	0	0.02	.	.	.	.	gene18238	0.545	1.382	.	.	.	.	XBXT10g011292	0.063	0.088	X	.	.	.	ENSDARG00000015686	bmp6	4.326	2.261	0.572	X	.	.	.	.	.
bmp7.1	LS	gene5219	0.262	0.116	.	.	.	.	gene16423	0.07	0	.	.	.	.	XBXT10g012017	0.073	0.615	X	.	X	.	ENSDARG00000018260	bmp7a	0.862	17.985	113.764	X	X	X	X	X	X
bmp7.2	LS	gene4112	21.752	90.598	X	X	.	D	gene12065	10.354	30.034	.	.	.	.	XBXT10g017315	78.895	305.475	X	X	X	D	ENSDARG00000018260	bmp7a	0.862	17.985	113.764	X	X	X	X	X	X
bmper	L	gene1369	0.034	0.03	.	.	.	.	NA	NA	NA	NA	NA	NA	NA	XBXT10g000943	0.032	0.352	X	.	.	.	ENSDARG00000101980	bmper	0	6.646	32.866	X	X	X	X	X	X
bmpr1a	LS	gene1511	94.519	85.482	X	X	D	D	gene16516	84.364	76.576	X	X	D	D	XBXT10g000737	84.408	97.162	X	X	X	.	ENSDARG00000105045, ENSDARG00000019728	bmpr1ab, bmpr1aa	119.624	80.289	93.16	X	X	X	X	X	X
bmpr1b	LS	gene10924	4.401	3.763	.	.	.	D	gene11971	2.896	3.282	.	.	.	.	XBXT10g012773	2.222	1.5	X	X	.	.	ENSDARG00000104100, ENSDARG00000102742	bmpr1ba, bmpr1bb	119.602	88.662	5.385	X	.	.	.	.	.
bmpr2	LS	gene49674	6.322	5.877	.	.	.	D	gene46507	5.049	3.237	.	.	D	.	XBXT10g019416	0	0.142	X	.	.	.	NA	NA	NA	NA	NA	NA	NA	NA	NA	NA	NA
bms1	L	gene50783	81.094	99.739	X	.	.	.	NA	NA	NA	NA	NA	NA	NA	XBXT10g019777	132.363	164.852	X	X	.	.	ENSDARG00000054154	bms1	36.984	31.665	73.297	X	.	X	X	.	.
bmt2	LS	gene15709	52.03	61.934	.	.	.	.	gene16292	121.543	162.163	.	.	U	.	XBXT10g003896	70.573	87.118	X	X	X	.	ENSDARG00000062181	bmt2	159.414	144.693	24.476	X	.	.	.	.	.
bnc1	LS	gene35259	22.834	17.388	.	.	.	.	gene20437	6.283	9.195	.	.	.	.	XBXT10g002074	37.397	32.681	X	X	.	.	NA	NA	NA	NA	NA	NA	NA	NA	NA	NA	NA
bnc2	LS	gene14681	0.221	0.028	.	.	.	.	gene12599	0.066	0.008	.	.	.	.	XBXT10g008830	0.736	0.831	X	.	.	.	ENSDARG00000069989	bnc2	0	0	0	.	.	.	.	.	.
bnip1	LS	gene9679	7.134	4.227	.	.	.	D	gene3579	13.368	15.101	.	.	.	.	XBXT10g013487	61.198	45.816	X	X	.	.	NA	NA	NA	NA	NA	NA	NA	NA	NA	NA	NA
bnip2	S	NA	NA	NA	NA	NA	NA	NA	gene5849	38.472	32.723	.	.	.	.	XBXT10g019625	42.679	50.012	X	X	.	.	ENSDARG00000013397	bnip2	58.393	57.655	32.676	X	.	.	X	.	.
bnip3	LS	gene39695	28.509	22.392	X	.	D	U	gene41345	15.412	14.132	.	.	.	.	XBXT10g014400	19.784	21.339	X	X	X	.	ENSDARG00000099961	bnip3	0	0.3	0	.	.	.	.	.	.
bnip3l	LS	gene13268	35.451	42.281	X	.	.	.	gene36491	112.164	89.991	.	.	.	U	XBXT10g006179	66.303	77.116	X	X	.	.	ENSDARG00000025468, ENSDARG00000028067	bnip3la, bnip3lb	76.378	83.813	72.814	X	.	.	.	.	.
bnipl	LS	gene45469	23.9	40.815	.	.	.	.	gene8934	0	0.283	.	.	.	.	XBXT10g011934	80.86	61.662	X	X	.	.	ENSDARG00000060435	bnipl	0	0.188	8.447	X	.	.	X	.	.
boc	LS	gene1037	16.385	9.471	.	.	.	.	gene4718	16.556	10.643	.	.	.	.	XBXT10g003699	7.222	4.619	X	X	.	.	ENSDARG00000074335	boc	6.597	9.638	31.215	X	.	X	X	.	.
bod1	L	gene82	155.971	116.778	.	.	.	.	NA	NA	NA	NA	NA	NA	NA	XBXT10g017550	149.933	104.779	X	X	X	U	ENSDARG00000103922	bod1	51.366	44.735	23.379	X	.	.	.	.	.
bod1l1	L	gene13802	67.515	59.033	.	.	.	.	NA	NA	NA	NA	NA	NA	NA	XBXT10g002427	101.062	130.81	X	X	.	.	NA	NA	NA	NA	NA	NA	NA	NA	NA	NA	NA
bok	LS	gene443	0	0.125	.	.	.	.	gene9863	0	0	.	.	.	.	XBXT10g003524	0	0	X	.	.	.	ENSDARG00000008807, ENSDARG00000052129	bokb, boka	174.994	145.703	8.364	X	.	.	.	.	.
bola1	LS	gene7538	15.031	14.731	.	.	.	.	gene12254	1.792	1.597	.	.	.	.	XBXT10g018088	62.281	40.963	X	X	.	.	ENSDARG00000039915	bola1	27.666	7.369	10.786	X	.	.	.	.	.
bola2	L	gene12853	65.065	44.625	X	.	.	.	NA	NA	NA	NA	NA	NA	NA	XBXT10g011442	100.61	33.53	X	X	.	.	NA	NA	NA	NA	NA	NA	NA	NA	NA	NA	NA
bola3	S	NA	NA	NA	NA	NA	NA	NA	gene19890	35.782	19.027	.	.	.	.	XBXT10g018225	126.887	111.854	X	X	.	.	ENSDARG00000098130	bola3	62.488	36.201	17.977	X	.	.	.	.	.
bop1	LS	gene39674	67.838	50.074	.	.	.	.	gene4323	32.413	35.437	.	.	.	.	XBXT10g007549	80.104	54.435	.	X	NA	NA	ENSDARG00000063627	bop1	67.234	37.494	26.759	X	.	.	X	.	.
bora	LS	gene4561	36.125	29.276	.	.	.	.	gene1470	199.384	219.902	X	X	.	.	XBXT10g007577	233.262	296.825	X	X	.	.	ENSDARG00000042688	bora	120.364	101.039	51.257	X	.	.	X	.	.
borcs5	L	gene18462	22.429	17.49	.	.	.	.	NA	NA	NA	NA	NA	NA	NA	XBXT10g004633	20.476	16.321	X	X	.	.	ENSDARG00000077830	borcs5	11.055	11.878	13.146	X	.	.	.	.	.
borcs6	LS	gene4029	8.969	10.293	.	.	.	D	gene11758	20.501	25.298	.	.	.	.	XBXT10g008363	37.627	45.939	X	X	.	.	NA	NA	NA	NA	NA	NA	NA	NA	NA	NA	NA
borcs7	S	NA	NA	NA	NA	NA	NA	NA	gene50456	67.935	61.005	.	.	.	.	XBXT10g019375	82.705	67.738	X	X	.	.	ENSDARG00000055070	borcs7	43.67	65.412	25.02	X	.	.	.	.	.
borcs8	S	NA	NA	NA	NA	NA	NA	NA	gene12139	46.165	32.249	.	.	.	.	XBXT10g012692	8.539	24.638	X	X	.	.	ENSDARG00000071339	borcs8	41.557	23.693	18.145	X	.	.	.	.	.
bpgm	LS	gene5037	11.77	21.383	.	.	.	D	gene6840	27.33	21.288	.	.	.	.	XBXT10g003235	35.972	35.152	X	X	.	.	ENSDARG00000070826	bpgm	21.881	10.16	0.939	X	.	.	.	.	.
bphl	L	gene13275	2.907	6.624	.	.	.	U	NA	NA	NA	NA	NA	NA	NA	XBXT10g002051	8.17	6.718	X	X	.	.	NA	NA	NA	NA	NA	NA	NA	NA	NA	NA	NA
bpi.4	S	NA	NA	NA	NA	NA	NA	NA	gene2859	0.082	0.028	.	.	.	.	XBXT10g017238	0	0	X	.	.	.	NA	NA	NA	NA	NA	NA	NA	NA	NA	NA	NA
bpnt1	L	gene12435	32.862	23.489	.	.	.	.	NA	NA	NA	NA	NA	NA	NA	XBXT10g006076	42.43	53.649	X	X	.	.	ENSDARG00000043684	bpnt1	49.552	39.485	14.645	X	.	.	.	.	.
bpnt2	LS	gene3935	42.963	41.263	X	.	.	.	gene6084	87.824	75.281	.	.	.	.	XBXT10g010205	90.892	102.374	X	X	.	.	ENSDARG00000058114	impad1	52.439	46.506	12.341	X	.	.	.	.	.
bptf	LS	gene38949	54.656	45.799	.	.	.	.	gene50851	56.609	55.81	.	.	.	.	XBXT10g011270	16.478	12.87	X	X	.	.	ENSDARG00000077361	bptf	50.278	26.611	25.77	X	.	.	X	.	.
braf	LS	gene20156	76.083	45.973	.	.	.	.	gene12377	32.579	23.019	.	.	.	.	XBXT10g004545	2.68	2.338	X	X	.	.	ENSDARG00000017661	braf	25.769	16.571	4.394	X	.	.	X	.	.
brap	LS	gene12491	31.481	31.283	.	.	.	.	gene10671	7.506	8.281	.	.	.	.	XBXT10g008823	54.761	62.175	X	X	.	.	ENSDARG00000008560	brap	75.438	56.772	7.894	X	.	.	.	.	.
brat1	L	gene20299	22.451	21.408	.	.	.	.	NA	NA	NA	NA	NA	NA	NA	XBXT10g019226	36.316	40.575	X	X	.	.	ENSDARG00000062585	brat1	23.683	33.236	3.385	X	.	.	.	.	.
brca1	L	gene6724	104.843	111.181	.	.	.	.	NA	NA	NA	NA	NA	NA	NA	XBXT10g005488	153.538	197.861	X	X	.	.	NA	NA	NA	NA	NA	NA	NA	NA	NA	NA	NA
brca2	L	gene48247	61.402	60.972	.	.	.	.	NA	NA	NA	NA	NA	NA	NA	XBXT10g005249	29.335	38.313	X	X	.	.	ENSDARG00000079015	brca2	136.886	50.805	24.734	X	.	.	X	.	.
brcc3	L	gene5485	38.116	50.959	.	.	.	.	NA	NA	NA	NA	NA	NA	NA	XBXT10g013841	122.728	118.618	X	X	X	U	NA	NA	NA	NA	NA	NA	NA	NA	NA	NA	NA
brd1	LS	gene16400	49.036	48.032	X	X	U	.	gene9314	46.061	40.211	X	X	.	D	XBXT10g007807	92.971	88.514	X	X	.	.	ENSDARG00000013596, ENSDARG00000051798	brd1a, brd1b	52.788	69.845	102.138	X	X	X	X	.	.
brd2	S	NA	NA	NA	NA	NA	NA	NA	gene42903	36.752	65.308	X	X	U	D	XBXT10g005924	26.694	40.236	X	X	X	.	ENSDARG00000046087, ENSDARG00000022280	brd2b, brd2a	89.071	150.101	97.945	X	X	X	X	.	.
brd3	S	NA	NA	NA	NA	NA	NA	NA	gene50065	173.325	135.254	.	.	.	.	XBXT10g007760	26.036	27.542	X	X	.	.	ENSDARG00000006527, ENSDARG00000100129	brd3a, brd3b	254.145	300.177	397.459	X	.	X	X	.	.
brd4	LS	gene12898	64.704	50.911	X	X	U	D	gene11939	48.178	41.691	X	X	U	D	XBXT10g004226	1.392	3.524	X	X	X	.	ENSDARG00000078904	brd4	23.658	10.868	6.277	X	X	X	X	.	.
brd7	L	gene8414	120.497	105.07	X	.	.	.	NA	NA	NA	NA	NA	NA	NA	XBXT10g016763	57.7	77.642	X	X	.	.	ENSDARG00000008380	brd7	149.598	169.593	200.51	X	.	X	X	.	.
brd8	LS	gene34494	28.873	25.097	.	.	.	.	gene15520	18.864	15.261	.	.	.	.	XBXT10g003398	103.247	67.691	X	X	X	.	ENSDARG00000025071	brd8	109.321	142.955	126.284	X	.	X	X	.	.
brd9	L	gene20552	26.455	21.414	.	.	.	.	NA	NA	NA	NA	NA	NA	NA	XBXT10g019636	106.955	102.756	X	X	.	.	ENSDARG00000017143	brd9	42.489	34.439	28.762	X	.	.	X	.	.
brdt	LS	gene47077	0	0	.	.	.	.	gene48902	66.008	48.661	.	.	.	.	XBXT10g003142	222.123	115.111	X	X	.	.	ENSDARG00000102802	brdt	49.288	26.557	10.126	X	X	X	X	.	.
brf1	L	gene13586	66.147	58.271	.	.	.	.	NA	NA	NA	NA	NA	NA	NA	XBXT10g002898	47.755	48.66	X	X	.	.	ENSDARG00000017835, ENSDARG00000005002	brf1a, brf1b	46.23	47.92	7.054	X	.	.	X	.	.
brf2	LS	gene7383	46.556	36.791	.	.	.	.	gene18815	62.604	35.464	.	.	.	.	XBXT10g005918	37.423	33.007	X	X	.	.	ENSDARG00000002060	brf2	33.272	22.131	3.804	X	.	.	.	.	.
bri3	LS	gene46163	49.715	29.987	.	.	.	.	gene1009	37.003	40.058	.	.	.	.	XBXT10g008862	43.179	34.66	X	X	.	.	ENSDARG00000086332	bri3	23.226	27.226	28.333	X	.	.	.	.	.
bri3bp	LS	gene16931	26.697	34.141	.	.	.	.	gene8245	14.063	15.959	.	.	.	.	XBXT10g006985	123.808	141.187	X	X	.	.	ENSDARG00000010108	bri3bp	42.92	42.508	14.395	X	.	.	.	.	.
bricd5	LS	gene46566	0.2	0.236	.	.	.	U	gene3033	0	0.044	.	.	.	.	XBXT10g003318	0.019	0.027	X	.	.	.	ENSDARG00000056247	bricd5	0	0.098	0	.	.	.	.	.	.
brinp1	LS	gene8570	1.07	0	.	.	.	.	gene2909	0.029	0.027	.	.	.	.	XBXT10g006188	0.078	0.022	X	.	.	.	NA	NA	NA	NA	NA	NA	NA	NA	NA	NA	NA
brinp2	LS	gene11854	0.951	0.861	.	.	.	.	gene9666	0.184	0.01	.	.	.	.	XBXT10g016695	61.544	63.422	X	X	.	.	ENSDARG00000014302	brinp2	0	0	0	.	.	.	.	.	.
brinp3	L	gene7554	0	0.028	.	.	.	.	NA	NA	NA	NA	NA	NA	NA	XBXT10g015952	0.094	0.329	X	.	.	.	ENSDARG00000061051, ENSDARG00000076351	brinp3a.2, brinp3a.1	0	0	0.296	.	.	.	.	.	.
brip1	L	gene10837	44.371	48.122	.	.	.	.	NA	NA	NA	NA	NA	NA	NA	XBXT10g004953	77.175	86.105	X	X	.	.	ENSDARG00000074410	brip1	39.839	24.269	3.975	X	.	.	X	.	.
brix1	LS	gene19512	59.496	46.588	X	.	U	.	gene11899	87.42	75.491	X	.	.	.	XBXT10g008529	131.765	93.868	X	X	.	.	ENSDARG00000098935	bxdc2	225.231	215.397	142.552	X	.	.	X	.	.
brk1	LS	gene40899	127.677	152.048	.	.	.	.	gene16210	48.971	62.039	.	.	.	.	XBXT10g003330	119.107	145.35	X	X	X	U	ENSDARG00000041974	brk1	47.138	26.443	31.473	X	.	.	.	.	.
brms1	L	gene47785	1.989	1.526	.	.	.	.	NA	NA	NA	NA	NA	NA	NA	XBXT10g014723	17.346	18.738	X	X	.	.	ENSDARG00000051955	brms1	4.951	5.234	0.368	X	.	.	.	.	.
brms1l	LS	gene8391	34.351	31.74	.	.	.	.	gene42820	104.936	95.907	X	.	.	.	XBXT10g000858	119.972	122.732	X	X	.	.	ENSDARG00000006235, ENSDARG00000018047	brms1la, brms1lb	109.328	122.25	74.148	X	.	.	X	.	.
brox	LS	gene11518	31.144	20.537	.	.	.	.	gene10646	19.958	25.29	.	.	.	.	XBXT10g005372	30.418	30.774	X	X	.	.	ENSDARG00000013659	brox	25.52	29.767	20.437	X	.	.	X	.	.
brpf1	LS	gene13610	66.674	56.422	X	.	U	.	gene48899	65.404	56.598	X	.	U	.	XBXT10g017808	12.795	14.295	X	X	.	.	ENSDARG00000103665	brpf1	80.008	50.027	31.166	X	.	.	X	.	.
brpf3	S	NA	NA	NA	NA	NA	NA	NA	gene6412	39.241	43.132	.	.	.	.	XBXT10g009231	36.063	35.035	X	X	.	.	ENSDARG00000074238	brpf3b	99.686	72.123	25.628	X	.	X	X	.	.
brs3	LS	gene36639	0	0.201	.	.	.	.	gene18012	2.537	2.079	.	.	.	.	XBXT10g019825	0	0	X	.	.	.	NA	NA	NA	NA	NA	NA	NA	NA	NA	NA	NA
brwd1	L	gene16824	65.02	62.723	.	.	.	.	NA	NA	NA	NA	NA	NA	NA	XBXT10g012710	69.764	70.405	X	X	.	.	NA	NA	NA	NA	NA	NA	NA	NA	NA	NA	NA
brwd3	L	gene18608	89.077	80.896	X	.	U	.	NA	NA	NA	NA	NA	NA	NA	XBXT10g008938	84.971	110.843	X	X	.	.	ENSDARG00000035540	brwd3	158.608	149.714	111.61	X	.	X	X	.	.
bscl2	L	gene5022	30.617	28.402	.	.	.	.	NA	NA	NA	NA	NA	NA	NA	XBXT10g018578	17.1	16.118	X	X	.	.	ENSDARG00000037008	bscl2	35.69	16.765	4.334	X	.	.	.	.	.
bsdc1	LS	gene18500	34.994	29.3	.	.	.	.	gene43172	58.891	55.419	.	.	.	.	XBXT10g015584	59.399	49.428	X	X	X	.	ENSDARG00000052623	bsdc1	32.467	37.898	38.607	X	.	.	X	.	.
bsg	LS	gene8876	220.724	299.439	X	X	D	D	gene43891	276.945	196.507	X	X	D	D	XBXT10g007806	689.636	845.943	X	X	.	.	ENSDARG00000019881	bsg	517.868	524.427	522.336	X	.	.	X	.	.
bsk146	LS	gene16721	0	0	.	.	.	.	gene5987	0	0	.	.	.	.	XBXT10g017954	0	0	X	.	.	.	ENSDARG00000099069	bsk146	0.476	0.068	0.283	.	.	.	.	.	.
bsn	S	NA	NA	NA	NA	NA	NA	NA	gene13151	1.193	0.217	.	.	.	.	XBXT10g007882	0.009	0.006	X	.	.	.	NA	NA	NA	NA	NA	NA	NA	NA	NA	NA	NA
bsnd	LS	gene42176	0	0	.	.	.	.	gene17079	0.025	0	.	.	.	.	XBXT10g008950	2.764	3.784	X	X	.	.	ENSDARG00000086265	bsnd	0	0	0.402	.	.	.	.	.	.
bspry	LS	gene11616	1.765	2.099	X	X	U	D	gene5865	5.487	0.03	.	.	.	.	XBXT10g013310	0.137	0.245	X	.	.	.	ENSDARG00000104875	bspry	4.435	2.873	1.438	X	.	.	.	.	.
bsx	LS	gene48742	0	0.092	.	.	.	.	gene43878	0	0	.	.	.	.	XBXT10g008119	0	0	X	.	.	.	ENSDARG00000068976	bsx	0	1.048	1.093	X	.	.	.	.	.
btaf1	L	gene1140	153.485	127.802	.	.	.	.	NA	NA	NA	NA	NA	NA	NA	XBXT10g008464	124.252	123.591	X	X	.	.	ENSDARG00000060089	btaf1	129.53	105.13	17.552	X	.	.	X	.	.
btbd1	L	gene8904	0	0.055	.	.	.	.	NA	NA	NA	NA	NA	NA	NA	XBXT10g009094	0	0.113	X	.	.	.	NA	NA	NA	NA	NA	NA	NA	NA	NA	NA	NA
btbd10	LS	gene15125	68.258	53.762	.	.	.	.	gene10801	71.512	51.719	X	.	.	.	XBXT10g009448	54.048	44.866	X	X	X	U	ENSDARG00000020252, ENSDARG00000062674	btbd10b, btbd10a	150.008	62.252	68.92	X	X	X	X	.	.
btbd11	LS	gene3262	2.171	2.071	.	.	.	.	gene1988	0.667	0.055	.	.	.	.	XBXT10g008955	0.178	0.083	X	.	.	.	ENSDARG00000063255, ENSDARG00000063040	btbd11a, btbd11b	1.149	2.457	0.57	X	.	.	.	.	.
btbd17	S	NA	NA	NA	NA	NA	NA	NA	gene14846	0.056	0.015	.	.	.	.	XBXT10g003170	221.06	267.482	X	X	.	.	NA	NA	NA	NA	NA	NA	NA	NA	NA	NA	NA
btbd19	S	NA	NA	NA	NA	NA	NA	NA	gene17320	20.201	36.036	.	.	.	.	XBXT10g020034	11.529	11.311	X	X	.	.	NA	NA	NA	NA	NA	NA	NA	NA	NA	NA	NA
btbd2	LS	gene49157	14.482	10.757	.	.	.	.	gene45453	36.657	32.42	.	.	.	.	XBXT10g003821	21.123	28.209	X	X	X	U	ENSDARG00000042091	btbd2a	33.812	8.883	3.285	X	.	.	.	.	.
btbd3	LS	gene8076	36.643	31.121	.	.	.	.	gene9478	37.944	50.987	.	.	.	.	XBXT10g007520	66.678	82.93	X	X	X	U	ENSDARG00000005544, ENSDARG00000087517	btbd3a, btbd3b	101.029	85.004	64.193	X	.	.	.	.	.
btbd6	LS	gene15224	1.099	5.654	X	X	.	D	gene479	87.713	61.638	.	.	.	.	XBXT10g004808	11.035	14.542	X	X	.	.	ENSDARG00000032369, ENSDARG00000076440	btbd6b, btbd6a	17.715	10.293	5.771	X	.	.	.	.	.
btbd7	LS	gene8061	5.625	3.998	X	.	.	.	gene11921	31.208	27.24	X	.	.	D	XBXT10g007310	3.788	5.797	X	X	.	.	ENSDARG00000003069	btbd7	116.823	90.116	12.852	X	.	.	X	.	.
btbd8	LS	gene9692	30.002	36.269	.	.	.	.	gene34816	0.011	0.032	.	.	.	.	XBXT10g012365	12.886	16.488	X	X	.	.	NA	NA	NA	NA	NA	NA	NA	NA	NA	NA	NA
btbd9	LS	gene42604	17.81	10.659	.	.	.	.	gene15082	13.219	15.412	.	.	.	.	XBXT10g001836	18.627	15.799	X	X	.	.	ENSDARG00000068983	btbd9	109.784	88.257	13.618	X	.	.	X	.	.
btc	LS	gene9361	0	0.486	.	.	D	.	gene36020	0.024	0.032	.	.	.	.	XBXT10g012497	2.09	2.207	X	X	X	.	ENSDARG00000098112	btc	41.12	14.066	0.998	X	.	.	.	.	.
btd	L	gene43754	2.907	1.701	.	.	.	.	NA	NA	NA	NA	NA	NA	NA	XBXT10g019802	2.606	1.606	X	X	.	.	ENSDARG00000099596	btd	11.878	12.463	1.503	X	.	.	.	.	.
btf3	S	NA	NA	NA	NA	NA	NA	NA	gene42549	192.098	131.712	X	X	U	.	XBXT10g007246	509.06	558.982	X	X	.	.	ENSDARG00000035400	btf3	370.944	312.009	594.742	X	X	X	X	.	.
btf3l4	LS	gene17177	135.042	92.206	X	.	.	U	gene11599	97.816	68.099	X	.	.	U	XBXT10g014026	213.266	203.204	X	X	.	.	ENSDARG00000089681	btf3l4	288.5	299.647	251.511	X	.	.	X	.	.
btg1	LS	gene9403	39.411	75.088	X	X	U	D	gene2452	166.763	215.508	X	X	.	D	XBXT10g010281	285.779	484.611	X	X	X	D	ENSDARG00000027249	btg1	5.282	11.387	38.372	X	X	X	X	.	.
btg2	S	NA	NA	NA	NA	NA	NA	NA	gene4032	10.412	7.304	.	.	.	D	XBXT10g010323	71.723	78.47	X	X	.	.	ENSDARG00000020298	btg2	441.7	317.499	164.35	X	.	.	.	.	.
btg3	S	NA	NA	NA	NA	NA	NA	NA	gene15537	283.193	139.969	.	.	U	D	XBXT10g017380	103.494	56.377	X	X	X	U	ENSDARG00000069065	btg3	354.469	365.547	68.748	X	.	X	X	.	.
btg4	LS	gene2639	506.259	253.089	.	.	.	U	gene14351	783.116	568.691	.	.	.	.	XBXT10g017860	1697.86	394.157	X	X	.	.	ENSDARG00000035171	btg4	1327.17	523.857	12.959	X	.	.	.	.	.
btg5.1	LS	gene19096	325.079	147.285	.	.	D	.	gene10064	2.13	2.059	.	.	.	U	XBXT10g007518	1442.95	964.129	X	X	.	.	NA	NA	NA	NA	NA	NA	NA	NA	NA	NA	NA
btg5.2	LS	gene1284	25.529	15.641	.	.	.	.	gene2708	0.1	82.925	X	X	.	D	XBXT10g015114	13.495	11.793	X	X	X	.	NA	NA	NA	NA	NA	NA	NA	NA	NA	NA	NA
btg5.3	LS	gene7263	4.818	60.238	X	X	U	D	gene50970	0.225	0	.	.	.	.	XBXT10g013378	0.972	126.314	X	X	X	D	NA	NA	NA	NA	NA	NA	NA	NA	NA	NA	NA
btk	L	gene675	0.152	0.032	.	.	.	.	NA	NA	NA	NA	NA	NA	NA	XBXT10g016349	0.365	0.157	X	.	X	U	ENSDARG00000004433	btk	3.409	1.231	0.405	X	.	.	.	.	.
btn2a1	S	NA	NA	NA	NA	NA	NA	NA	gene45515	19.514	22.747	.	.	.	.	XBXT10g013295	16.528	14.14	X	X	.	.	NA	NA	NA	NA	NA	NA	NA	NA	NA	NA	NA
btn2a2	L	gene14837	1.173	0	.	.	.	.	NA	NA	NA	NA	NA	NA	NA	XBXT10g009903	0.494	0.758	X	.	.	.	NA	NA	NA	NA	NA	NA	NA	NA	NA	NA	NA
btrc	LS	gene17483	122.375	122.932	.	.	.	.	gene2822	88.779	74.155	.	.	.	.	XBXT10g014508	179.905	202.017	X	X	.	.	NA	NA	NA	NA	NA	NA	NA	NA	NA	NA	NA
bub1	L	gene4909	99.535	99.567	.	.	.	.	NA	NA	NA	NA	NA	NA	NA	XBXT10g006795	229.619	244.912	X	X	.	.	ENSDARG00000077029	bub1	69.452	38.101	56.985	X	.	X	X	.	.
bub1b	L	gene35951	125.775	116.925	.	.	.	.	NA	NA	NA	NA	NA	NA	NA	XBXT10g013448	142.712	78.053	X	X	.	.	NA	NA	NA	NA	NA	NA	NA	NA	NA	NA	NA
bub3	LS	gene9443	261.404	241.725	X	.	U	.	gene9071	55.02	86.287	.	.	.	.	XBXT10g018474	277.979	200.146	X	X	X	U	ENSDARG00000075883	bub3	148.963	93.098	76.086	X	.	.	X	.	.
bud13	L	gene37359	34.326	34.083	X	.	.	.	NA	NA	NA	NA	NA	NA	NA	XBXT10g013530	6.981	13.697	X	X	X	D	ENSDARG00000006666	bud13	54.089	59.473	49.138	X	.	.	X	.	.
bud23	L	gene9210	83.406	57.032	X	.	U	.	NA	NA	NA	NA	NA	NA	NA	XBXT10g009597	188.01	171.771	X	X	X	.	ENSDARG00000063596	bud23	68.087	46.72	56.096	X	.	.	X	.	.
bud31	LS	gene329	77.134	79.038	.	.	.	.	gene4687	361.778	327.004	.	.	.	.	XBXT10g004707	188.072	174.42	X	X	X	.	ENSDARG00000017084	bud31	200.065	302.725	317.801	X	.	.	X	.	.
bves	LS	gene44337	49.639	56.651	.	.	.	.	gene1618	13.551	1.989	.	.	.	.	XBXT10g001353	20.256	20.677	X	X	.	.	ENSDARG00000058548	bves	0	0.112	0	.	.	.	.	.	.
bysl	S	NA	NA	NA	NA	NA	NA	NA	gene18169	71.771	75.437	X	.	U	.	XBXT10g005883	107.275	54.609	X	X	X	U	ENSDARG00000001057	bysl	169.971	114.946	93.484	X	.	.	.	.	.
bzw1	LS	gene5707	137.076	146.02	.	.	U	.	gene11859	111.156	126.496	.	.	.	.	XBXT10g005728	373.697	480.579	X	X	.	.	ENSDARG00000099148, ENSDARG00000010481	bzw1b, bzw1a	1841.02	2331.91	2454.1	X	X	X	X	.	.
c-answer	L	gene9587	20.405	31.311	.	.	.	.	NA	NA	NA	NA	NA	NA	NA	XBXT10g001501	35.865	24.137	.	X	NA	NA	NA	NA	NA	NA	NA	NA	NA	NA	NA	NA	NA
c10orf105	L	gene42518	0.043	0	.	.	.	.	NA	NA	NA	NA	NA	NA	NA	XBXT10g028303	0	0.175	X	.	.	.	NA	NA	NA	NA	NA	NA	NA	NA	NA	NA	NA
c10orf67	L	gene41226	1.216	0.792	.	.	.	.	NA	NA	NA	NA	NA	NA	NA	XBXT10g017824	2.616	2.531	X	X	.	.	NA	NA	NA	NA	NA	NA	NA	NA	NA	NA	NA
c11orf1	L	gene20139	0.953	1.105	.	.	.	.	NA	NA	NA	NA	NA	NA	NA	XBXT10g010774	18.574	13.143	X	X	.	.	NA	NA	NA	NA	NA	NA	NA	NA	NA	NA	NA
c11orf49	L	gene12451	11.717	11.636	.	.	.	.	NA	NA	NA	NA	NA	NA	NA	XBXT10g019786	3.325	1.547	X	X	.	.	NA	NA	NA	NA	NA	NA	NA	NA	NA	NA	NA
c11orf53	LS	gene597	0.08	0.04	.	.	.	.	gene15760	0.345	1.159	.	.	.	.	XBXT10g015412	0.124	0.174	X	.	.	.	NA	NA	NA	NA	NA	NA	NA	NA	NA	NA	NA
c11orf54	L	gene20512	17.372	13.192	.	.	.	.	NA	NA	NA	NA	NA	NA	NA	XBXT10g017827	5.036	6.729	X	X	.	.	NA	NA	NA	NA	NA	NA	NA	NA	NA	NA	NA
c11orf58	LS	gene15353	93.077	68.744	X	.	.	.	gene14366	37.608	23.798	X	.	U	.	XBXT10g015170	347.694	289.187	X	X	.	.	ENSDARG00000022564	C18H11orf58	111.021	127.613	99.722	X	.	.	.	.	.
c11orf65	L	gene39139	7.267	4.505	.	.	.	.	NA	NA	NA	NA	NA	NA	NA	XBXT10g018683	7.78	7.917	X	X	.	.	NA	NA	NA	NA	NA	NA	NA	NA	NA	NA	NA
c11orf68	L	gene12012	26.152	14.867	.	.	.	.	NA	NA	NA	NA	NA	NA	NA	XBXT10g003562	24.855	16.331	X	X	.	.	NA	NA	NA	NA	NA	NA	NA	NA	NA	NA	NA
c11orf87	LS	gene19187	0	0.035	.	.	.	.	gene9316	0	0.08	.	.	.	.	XBXT10g007887	0	0.189	X	.	.	.	NA	NA	NA	NA	NA	NA	NA	NA	NA	NA	NA
c11orf96	LS	gene1164	15.869	10.07	.	.	.	U	gene20264	100.983	76.821	.	.	.	.	XBXT10g023990	185	123.919	X	X	.	.	NA	NA	NA	NA	NA	NA	NA	NA	NA	NA	NA
c12orf4	L	gene47544	66.448	58.35	.	.	.	.	NA	NA	NA	NA	NA	NA	NA	XBXT10g000659	15.371	16.197	X	X	.	.	NA	NA	NA	NA	NA	NA	NA	NA	NA	NA	NA
c12orf57	L	gene46393	30.727	26.537	.	.	U	D	NA	NA	NA	NA	NA	NA	NA	XBXT10g014270	50.751	44.567	X	X	.	.	NA	NA	NA	NA	NA	NA	NA	NA	NA	NA	NA
c12orf73	L	gene47880	14.678	5.161	.	.	.	.	NA	NA	NA	NA	NA	NA	NA	XBXT10g004981	60.197	36.196	.	X	NA	NA	NA	NA	NA	NA	NA	NA	NA	NA	NA	NA	NA
c14orf119	LS	gene2934	18.941	14.866	X	.	.	.	gene7103	30.469	22.051	X	.	.	U	XBXT10g028775	108.616	98.245	X	X	.	.	NA	NA	NA	NA	NA	NA	NA	NA	NA	NA	NA
c14orf28	LS	gene7026	2.478	2.425	.	.	.	.	gene16903	0.043	0	.	.	.	.	XBXT10g006781	4.237	4.832	X	X	.	.	NA	NA	NA	NA	NA	NA	NA	NA	NA	NA	NA
c14orf93	LS	gene17127	19.931	23.215	.	.	.	.	gene11975	0.208	0.057	.	.	.	.	XBXT10g001842	10.451	11.002	X	X	.	.	NA	NA	NA	NA	NA	NA	NA	NA	NA	NA	NA
c15orf40	L	gene7024	12.642	8.614	.	.	.	.	NA	NA	NA	NA	NA	NA	NA	XBXT10g005470	33.5	27.166	X	X	.	.	NA	NA	NA	NA	NA	NA	NA	NA	NA	NA	NA
c15orf61	L	gene11191	12.445	7.699	.	.	.	.	NA	NA	NA	NA	NA	NA	NA	XBXT10g017713	3.408	2.718	X	X	.	.	NA	NA	NA	NA	NA	NA	NA	NA	NA	NA	NA
c16orf72	LS	gene18852	92.71	88.234	X	X	U	D	gene4363	117.325	114.706	X	.	.	.	XBXT10g011806	239.601	293.463	X	X	X	U	NA	NA	NA	NA	NA	NA	NA	NA	NA	NA	NA
c16orf87	L	gene17908	5.292	0.73	.	.	.	.	NA	NA	NA	NA	NA	NA	NA	XBXT10g010233	16.472	12.94	X	X	.	.	NA	NA	NA	NA	NA	NA	NA	NA	NA	NA	NA
c17orf49	LS	gene12051	10.849	10.199	.	.	.	.	gene36332	9.473	6.546	.	.	.	.	XBXT10g014011	18.104	20.164	X	X	X	.	NA	NA	NA	NA	NA	NA	NA	NA	NA	NA	NA
c17orf67	LS	gene9399	0	0	.	.	.	.	gene37479	0	0	.	.	.	.	XBXT10g014704	0.051	0	X	.	.	.	NA	NA	NA	NA	NA	NA	NA	NA	NA	NA	NA
c17orf75	L	gene6046	6.718	6.042	.	.	.	.	NA	NA	NA	NA	NA	NA	NA	XBXT10g003486	4.388	3.243	X	X	.	.	NA	NA	NA	NA	NA	NA	NA	NA	NA	NA	NA
c17orf98	L	gene1882	0	0.12	.	.	.	.	NA	NA	NA	NA	NA	NA	NA	XBXT10g004674	0.287	0.2	X	.	.	.	NA	NA	NA	NA	NA	NA	NA	NA	NA	NA	NA
c18orf21	L	gene20097	40.903	7.614	.	.	D	.	NA	NA	NA	NA	NA	NA	NA	XBXT10g006078	40.431	17.772	X	X	.	.	NA	NA	NA	NA	NA	NA	NA	NA	NA	NA	NA
c18orf25	LS	gene19963	47.928	47.195	X	.	.	.	gene18415	49.11	45.158	X	X	U	D	XBXT10g010248	142.478	151.504	X	X	.	.	NA	NA	NA	NA	NA	NA	NA	NA	NA	NA	NA
c18orf32	L	gene147	58.041	31.084	.	.	.	.	NA	NA	NA	NA	NA	NA	NA	XBXT10g008462	245.54	245.904	X	X	.	.	NA	NA	NA	NA	NA	NA	NA	NA	NA	NA	NA
c18orf54	S	NA	NA	NA	NA	NA	NA	NA	gene15487	2.694	2.975	.	.	.	.	XBXT10g004338	13.823	15.102	X	X	.	.	NA	NA	NA	NA	NA	NA	NA	NA	NA	NA	NA
c19orf12	S	NA	NA	NA	NA	NA	NA	NA	gene39360	57.386	33.05	.	.	.	.	XBXT10g003260	14.743	6.137	X	X	.	.	NA	NA	NA	NA	NA	NA	NA	NA	NA	NA	NA
c19orf25	LS	gene35984	24.265	23.247	.	.	.	.	gene1652	0.047	0.268	.	.	.	.	XBXT10g012228	56.155	63.937	.	X	NA	NA	NA	NA	NA	NA	NA	NA	NA	NA	NA	NA	NA
c19orf33	LS	gene37880	14.377	12.006	.	.	.	.	gene45966	0.083	0	.	.	.	.	XBXT10g015129	7.724	10.875	.	X	NA	NA	NA	NA	NA	NA	NA	NA	NA	NA	NA	NA	NA
c19orf44	L	gene8486	50.928	58.453	.	.	.	.	NA	NA	NA	NA	NA	NA	NA	XBXT10g009343	83.987	86.784	X	X	.	.	NA	NA	NA	NA	NA	NA	NA	NA	NA	NA	NA
c19orf47	LS	gene35590	89.29	80.99	X	.	.	.	gene41652	93.448	90.957	X	.	.	.	XBXT10g001934	183.545	175.92	X	X	X	U	NA	NA	NA	NA	NA	NA	NA	NA	NA	NA	NA
c19orf53	LS	gene44966	46.475	27.2	.	.	.	.	gene5647	93.244	104.376	.	.	.	.	XBXT10g010301	97.808	83.848	X	X	.	.	NA	NA	NA	NA	NA	NA	NA	NA	NA	NA	NA
c19orf54	S	NA	NA	NA	NA	NA	NA	NA	gene6491	1.624	1.954	.	.	.	.	XBXT10g007311	3.997	6.164	X	X	.	.	NA	NA	NA	NA	NA	NA	NA	NA	NA	NA	NA
c1d	L	gene16985	103.967	105.512	X	.	.	.	NA	NA	NA	NA	NA	NA	NA	XBXT10g004921	381.06	386.484	X	X	.	.	ENSDARG00000021112	c1d	83.697	101.45	45.533	X	.	.	X	.	.
c1galt1	LS	gene7390	31.625	27.08	.	.	.	.	gene10452	40.859	37.401	.	.	.	.	XBXT10g004496	33.728	40.911	X	X	X	U	ENSDARG00000055585, ENSDARG00000055561	c1galt1a, c1galt1b	97.778	89.371	24.736	X	.	.	.	.	.
c1galt1c1	LS	gene4211	14.168	12.245	.	.	.	.	gene11890	5.921	5.389	.	.	.	.	XBXT10g009568	37.576	31.835	X	X	.	.	ENSDARG00000036335	c1galt1c1	20.083	12.387	30.469	X	.	.	X	.	.
c1orf109	L	gene2238	9.818	25.832	.	.	.	D	NA	NA	NA	NA	NA	NA	NA	XBXT10g013418	50.466	38.481	X	X	.	.	ENSDARG00000012113	c19h1orf109	57.484	16.586	20.423	X	.	.	.	.	.
c1orf112	L	gene6686	20.852	17.819	.	.	.	.	NA	NA	NA	NA	NA	NA	NA	XBXT10g016266	75.201	34.104	X	X	.	.	NA	NA	NA	NA	NA	NA	NA	NA	NA	NA	NA
c1orf116	L	gene18885	111.519	131.389	.	.	.	.	NA	NA	NA	NA	NA	NA	NA	XBXT10g011185	108.739	48.844	X	X	.	.	NA	NA	NA	NA	NA	NA	NA	NA	NA	NA	NA
c1orf127	L	gene10203	0.436	0.505	.	.	.	.	NA	NA	NA	NA	NA	NA	NA	XBXT10g013024	0.504	0.745	X	.	.	.	NA	NA	NA	NA	NA	NA	NA	NA	NA	NA	NA
c1orf131	L	gene9142	58.417	37.708	.	.	.	.	NA	NA	NA	NA	NA	NA	NA	XBXT10g006260	145.277	134.326	X	X	.	.	ENSDARG00000078606	zgc:194224	26.061	12.175	47.775	X	.	.	.	.	.
c1orf158	L	gene1092	1.709	0	.	.	.	.	NA	NA	NA	NA	NA	NA	NA	XBXT10g020358	0.058	0	.	.	NA	NA	NA	NA	NA	NA	NA	NA	NA	NA	NA	NA	NA
c1orf159	LS	gene905	22.081	37.113	.	.	.	.	gene44483	0.108	0.102	.	.	.	.	XBXT10g007163	107.895	83.799	X	X	.	.	NA	NA	NA	NA	NA	NA	NA	NA	NA	NA	NA
c1orf174	LS	gene45412	121.467	80.659	.	.	.	.	gene39546	13.695	12.596	.	.	.	.	XBXT10g006015	48.631	53.632	X	X	.	.	NA	NA	NA	NA	NA	NA	NA	NA	NA	NA	NA
c1orf194	LS	gene20080	0	0	.	.	.	.	gene47534	0	0.264	.	.	.	.	XBXT10g005649	0	0	.	.	NA	NA	NA	NA	NA	NA	NA	NA	NA	NA	NA	NA	NA
c1orf21	LS	gene18506	25.573	29.028	.	.	.	.	gene49625	25.501	28.769	.	.	.	.	XBXT10g011941	19.298	16.381	X	X	.	.	NA	NA	NA	NA	NA	NA	NA	NA	NA	NA	NA
c1orf216	LS	gene3920	0	0	.	.	.	.	gene47602	0	0	.	.	.	.	XBXT10g023460	0.952	0.156	X	.	.	.	NA	NA	NA	NA	NA	NA	NA	NA	NA	NA	NA
c1orf35	L	gene7138	52.972	54.706	.	.	.	.	NA	NA	NA	NA	NA	NA	NA	XBXT10g007386	36.535	38.124	X	X	.	.	NA	NA	NA	NA	NA	NA	NA	NA	NA	NA	NA
c1orf43	LS	gene2756	12.275	4.638	.	.	.	.	gene9429	20.775	10.147	.	.	.	.	XBXT10g010335	22.913	9.321	X	X	X	U	NA	NA	NA	NA	NA	NA	NA	NA	NA	NA	NA
c1orf50	L	gene19232	91.219	65.582	.	.	.	.	NA	NA	NA	NA	NA	NA	NA	XBXT10g019604	175.531	156.095	X	X	.	.	NA	NA	NA	NA	NA	NA	NA	NA	NA	NA	NA
c1orf52	LS	gene42511	44.179	29.993	.	.	.	.	gene19965	73.17	84.276	.	.	.	.	XBXT10g019614	192.742	245.335	.	X	NA	NA	NA	NA	NA	NA	NA	NA	NA	NA	NA	NA	NA
c1orf74	L	gene10977	15.163	12.92	.	.	.	.	NA	NA	NA	NA	NA	NA	NA	XBXT10g017804	69.41	58.952	X	X	.	.	NA	NA	NA	NA	NA	NA	NA	NA	NA	NA	NA
c1qbp	LS	gene10723	123.777	113.31	.	.	.	.	gene3623	131.979	117.569	.	.	.	.	XBXT10g017244	302.533	328.937	X	X	.	.	ENSDARG00000039887	c1qbp	378.885	287.17	202.866	X	.	.	.	.	.
c1ql4	LS	gene6625	0.311	0	.	.	.	.	gene6382	0	0	.	.	.	.	XBXT10g013438	0.162	0.113	X	.	.	.	NA	NA	NA	NA	NA	NA	NA	NA	NA	NA	NA
c1qtnf1	LS	gene15129	0	0	.	.	.	.	gene10358	0	0	.	.	.	.	XBXT10g004364	0	0	X	.	.	.	ENSDARG00000088878	c1qtnf1	0	0.501	0	.	.	.	.	.	.
c1qtnf12	LS	gene2791	0.02	0	.	.	.	.	gene6369	0.079	0.021	.	.	.	.	XBXT10g012193	0.173	0.121	X	.	.	.	ENSDARG00000070681	c1qtnf12	1.931	0.423	0.265	X	.	.	.	.	.
c1qtnf2	L	gene2656	0	0	.	.	.	.	NA	NA	NA	NA	NA	NA	NA	XBXT10g001335	0.042	0.117	X	.	.	.	ENSDARG00000059944	c1qtnf2	0	0.208	0.216	.	.	.	.	.	.
c1qtnf4	LS	gene10179	0.449	0.433	.	.	.	.	gene49850	4.218	2.255	.	.	.	U	XBXT10g009535	0.185	0.387	X	.	.	.	ENSDARG00000024299	c1qtnf4	3.831	1.878	0.273	X	.	.	.	.	.
c1qtnf9b	L	gene1339	0	0	.	.	.	.	NA	NA	NA	NA	NA	NA	NA	XBXT10g000223	0	0	X	.	.	.	NA	NA	NA	NA	NA	NA	NA	NA	NA	NA	NA
c1r	L	gene48070	0	0	.	.	.	.	NA	NA	NA	NA	NA	NA	NA	XBXT10g019611	0.102	0.101	X	.	.	.	ENSDARG00000100248	c1r	0	0	0	.	.	.	.	.	.
c1s	L	gene64	0.023	0.035	.	.	.	.	NA	NA	NA	NA	NA	NA	NA	XBXT10g009926	0	0.074	X	.	.	.	ENSDARG00000100599	c1s	0	0.228	0	.	.	.	.	.	.
c2	L	gene2484	0	0	.	.	.	.	NA	NA	NA	NA	NA	NA	NA	XBXT10g001956	0.296	0.29	X	.	.	.	NA	NA	NA	NA	NA	NA	NA	NA	NA	NA	NA
c20orf27	S	NA	NA	NA	NA	NA	NA	NA	gene549	1.351	1.438	.	.	.	.	XBXT10g014430	66.246	44.151	X	X	X	U	NA	NA	NA	NA	NA	NA	NA	NA	NA	NA	NA
c20orf85	S	NA	NA	NA	NA	NA	NA	NA	gene40618	0.091	0.263	.	.	.	.	XBXT10g006465	1.456	1.138	X	X	.	.	NA	NA	NA	NA	NA	NA	NA	NA	NA	NA	NA
c21orf62	LS	gene19293	0.834	0	.	.	.	.	gene17648	0	0	.	.	.	.	XBXT10g015386	0	0	X	.	.	.	NA	NA	NA	NA	NA	NA	NA	NA	NA	NA	NA
c21orf91	LS	gene3361	42.957	43.201	X	X	.	.	gene8635	77.985	79.589	.	.	.	.	XBXT10g014123	160.67	156.741	X	X	X	U	NA	NA	NA	NA	NA	NA	NA	NA	NA	NA	NA
c22orf15	LS	gene6125	0	0	.	.	.	.	gene48608	0	0.098	.	.	.	.	XBXT10g014779	0.124	0.519	.	.	NA	NA	NA	NA	NA	NA	NA	NA	NA	NA	NA	NA	NA
c22orf23	L	gene7736	3.695	3.079	.	.	.	.	NA	NA	NA	NA	NA	NA	NA	XBXT10g014076	14.742	13.429	X	X	.	.	NA	NA	NA	NA	NA	NA	NA	NA	NA	NA	NA
c22orf39	L	gene16657	6.273	3.096	.	.	.	.	NA	NA	NA	NA	NA	NA	NA	XBXT10g003293	29.842	16.355	X	X	.	.	NA	NA	NA	NA	NA	NA	NA	NA	NA	NA	NA
c2cd2	LS	gene9800	32.001	31.4	.	.	.	.	gene9001	0.238	0.269	.	.	.	.	XBXT10g015116	3.865	3.396	X	X	.	.	NA	NA	NA	NA	NA	NA	NA	NA	NA	NA	NA
c2cd2l	L	gene893	46.034	37.911	X	.	.	.	NA	NA	NA	NA	NA	NA	NA	XBXT10g010482	61.853	54.212	X	X	.	.	ENSDARG00000061066	c2cd2l	24.324	14.617	6.124	X	X	X	X	.	.
c2cd3	S	NA	NA	NA	NA	NA	NA	NA	gene46180	57.131	53.134	.	.	.	.	XBXT10g017475	10.475	10.995	X	X	.	.	ENSDARG00000074137	c2cd3	49.456	28.243	4.788	X	.	.	X	.	.
c2cd4c	LS	gene49594	0	0	.	.	.	.	gene20518	0	0	.	.	.	.	XBXT10g007971	0	0.065	X	.	.	.	NA	NA	NA	NA	NA	NA	NA	NA	NA	NA	NA
c2cd5	L	gene49794	24.473	19.006	.	.	.	.	NA	NA	NA	NA	NA	NA	NA	XBXT10g017150	21.152	18.396	X	X	.	.	ENSDARG00000094590	c2cd5	68.939	65.161	49.915	X	.	.	.	.	.
c2orf42	LS	gene13567	4.494	4.13	.	.	.	D	gene9861	5.889	7.744	.	.	.	.	XBXT10g010117	18.244	16.386	X	X	.	.	NA	NA	NA	NA	NA	NA	NA	NA	NA	NA	NA
c2orf49	LS	gene17967	74.863	68.388	.	.	.	.	gene253	9.31	7.639	.	.	.	.	XBXT10g010685	136.231	151.354	X	X	.	.	NA	NA	NA	NA	NA	NA	NA	NA	NA	NA	NA
c2orf50	LS	gene7050	0.204	0.22	.	.	.	.	gene46630	0	0	.	.	.	.	XBXT10g012148	0	0.108	X	.	.	.	NA	NA	NA	NA	NA	NA	NA	NA	NA	NA	NA
c2orf68	L	gene6933	3.749	2.082	.	.	.	.	NA	NA	NA	NA	NA	NA	NA	XBXT10g018542	5.03	4.762	X	X	X	D	NA	NA	NA	NA	NA	NA	NA	NA	NA	NA	NA
c2orf69	LS	gene4926	18.807	10.727	.	.	.	.	gene12308	13.373	14.292	.	.	.	.	XBXT10g018405	34.642	32.124	X	X	.	.	NA	NA	NA	NA	NA	NA	NA	NA	NA	NA	NA
c2orf73	L	gene4741	1.192	0.621	.	.	.	.	NA	NA	NA	NA	NA	NA	NA	XBXT10g004602	2.518	2.46	X	X	.	.	NA	NA	NA	NA	NA	NA	NA	NA	NA	NA	NA
c2orf76	LS	gene16821	20.306	11.128	.	.	.	.	gene39815	0	0	.	.	.	.	XBXT10g009083	20.808	7.984	.	X	NA	NA	NA	NA	NA	NA	NA	NA	NA	NA	NA	NA	NA
c2orf80	L	gene35215	0	0.049	.	.	.	.	NA	NA	NA	NA	NA	NA	NA	XBXT10g016360	0	0.123	.	.	NA	NA	NA	NA	NA	NA	NA	NA	NA	NA	NA	NA	NA
c3	L	gene7154	0	0.03	.	.	.	.	NA	NA	NA	NA	NA	NA	NA	XBXT10g014902	0.085	0.138	X	.	.	.	ENSDARG00000087359	c3a.2	0	0.033	0.482	.	.	.	.	.	.
c3ar1	L	gene18119	0.015	1.042	X	.	U	.	NA	NA	NA	NA	NA	NA	NA	XBXT10g015921	0.635	2.094	X	X	X	U	NA	NA	NA	NA	NA	NA	NA	NA	NA	NA	NA
c3orf38	S	NA	NA	NA	NA	NA	NA	NA	gene20233	28.167	26.895	.	.	.	.	XBXT10g000788	116.664	91.405	X	X	.	.	NA	NA	NA	NA	NA	NA	NA	NA	NA	NA	NA
c3orf49	L	gene35976	0	0	.	.	.	.	NA	NA	NA	NA	NA	NA	NA	XBXT10g019326	0	0	X	.	.	.	NA	NA	NA	NA	NA	NA	NA	NA	NA	NA	NA
c3orf52	L	gene18707	37.39	35.405	.	.	.	.	NA	NA	NA	NA	NA	NA	NA	XBXT10g003158	59.198	49.675	X	X	.	.	NA	NA	NA	NA	NA	NA	NA	NA	NA	NA	NA
c3orf70	LS	gene14701	0.033	0.121	.	.	.	.	gene16819	0.011	0	.	.	.	.	XBXT10g018725	0.02	0.028	X	.	.	.	NA	NA	NA	NA	NA	NA	NA	NA	NA	NA	NA
c3orf80	LS	gene6827	0	0	.	.	.	.	gene44238	0	0	.	.	.	.	XBXT10g011541	0	0.119	X	.	.	.	NA	NA	NA	NA	NA	NA	NA	NA	NA	NA	NA
c3p1	S	NA	NA	NA	NA	NA	NA	NA	gene45725	15.884	0.397	.	.	.	.	XBXT10g021391	0.03	0.062	X	.	.	.	NA	NA	NA	NA	NA	NA	NA	NA	NA	NA	NA
c4a	L	gene7917	0.023	0	.	.	.	D	NA	NA	NA	NA	NA	NA	NA	XBXT10g016656	0.014	0.079	X	.	.	.	NA	NA	NA	NA	NA	NA	NA	NA	NA	NA	NA
c4bpa	L	gene3991	67.934	58.865	.	.	.	.	NA	NA	NA	NA	NA	NA	NA	XBXT10g005104	67.104	83.42	X	X	.	.	NA	NA	NA	NA	NA	NA	NA	NA	NA	NA	NA
c4orf33.1	S	NA	NA	NA	NA	NA	NA	NA	gene351	4.948	6.207	.	.	.	.	XBXT10g003532	23.834	20.823	X	X	X	.	NA	NA	NA	NA	NA	NA	NA	NA	NA	NA	NA
c4orf45	L	gene8115	0	0.063	.	.	.	.	NA	NA	NA	NA	NA	NA	NA	XBXT10g016776	0	0	X	.	.	.	NA	NA	NA	NA	NA	NA	NA	NA	NA	NA	NA
c4orf47	L	gene47104	5.574	7.017	.	.	.	.	NA	NA	NA	NA	NA	NA	NA	XBXT10g011338	0.313	0.655	X	.	.	.	NA	NA	NA	NA	NA	NA	NA	NA	NA	NA	NA
c4orf48	LS	gene5252	0.347	0	.	.	.	.	gene12737	0	0	.	.	.	.	XBXT10g013020	1.863	1.878	X	X	.	.	ENSDARG00000089877	C7H4orf48	5.458	2.97	1.328	X	.	.	.	.	.
c5	L	gene47639	0.014	0.02	.	.	.	D	NA	NA	NA	NA	NA	NA	NA	XBXT10g011452	0.276	0.308	X	.	.	.	ENSDARG00000021004	c5	0	0.033	0	.	.	.	.	.	.
c5ar1	LS	gene12206	0.021	0	.	.	.	.	gene48310	0	0	.	.	.	.	XBXT10g001714	0	0	X	.	.	.	NA	NA	NA	NA	NA	NA	NA	NA	NA	NA	NA
c5orf15	S	NA	NA	NA	NA	NA	NA	NA	gene10993	3.589	4.666	X	.	U	.	XBXT10g003620	72.508	80.465	X	X	X	D	NA	NA	NA	NA	NA	NA	NA	NA	NA	NA	NA
c5orf22	L	gene50654	6.231	11.786	.	.	.	U	NA	NA	NA	NA	NA	NA	NA	XBXT10g010363	40.352	31.402	X	X	.	.	NA	NA	NA	NA	NA	NA	NA	NA	NA	NA	NA
c5orf24	LS	gene34392	19.54	24.959	.	.	.	.	gene13669	12.486	13.318	.	.	.	.	XBXT10g013289	3.671	2.907	X	X	.	.	NA	NA	NA	NA	NA	NA	NA	NA	NA	NA	NA
c6.1	L	gene1264	0.017	0.022	.	.	.	.	NA	NA	NA	NA	NA	NA	NA	XBXT10g019468	0.021	0.09	X	.	.	.	ENSDARG00000057113, ENSDARG00000093052	c6, c6	0.199	0.218	2.057	X	.	.	.	.	.
c6.2	L	gene18437	0	0	.	.	.	.	NA	NA	NA	NA	NA	NA	NA	XBXT10g010624	0	0.063	X	.	X	D	ENSDARG00000093052, ENSDARG00000057113	c6, c6	0.199	0.218	2.057	X	.	.	.	.	.
c6orf118	S	NA	NA	NA	NA	NA	NA	NA	gene4661	0.097	0.091	.	.	.	.	XBXT10g017444	8.555	6.795	X	X	.	.	NA	NA	NA	NA	NA	NA	NA	NA	NA	NA	NA
c6orf120	LS	gene45762	44.635	30.649	.	.	.	.	gene37985	9.284	9.346	.	.	.	.	XBXT10g012718	48.461	47.964	X	X	.	.	NA	NA	NA	NA	NA	NA	NA	NA	NA	NA	NA
c6orf136	LS	gene4537	62.116	64.211	.	.	D	.	gene8436	90.359	118.452	X	.	D	.	XBXT10g016941	94.171	54.859	X	X	.	.	NA	NA	NA	NA	NA	NA	NA	NA	NA	NA	NA
c6orf62	LS	gene13229	6.224	4.832	.	.	.	.	gene6208	16.291	13.396	X	.	D	.	XBXT10g005443	12.519	22.635	X	X	.	.	NA	NA	NA	NA	NA	NA	NA	NA	NA	NA	NA
c7	S	NA	NA	NA	NA	NA	NA	NA	gene8088	6.107	2.222	.	.	.	.	XBXT10g008000	0.131	0.657	X	.	X	D	ENSDARG00000042172, ENSDARG00000057121	c7a, c7b	9.485	0.915	11.541	X	.	.	.	.	.
c7orf25	L	gene6799	29.571	13.957	.	.	D	.	NA	NA	NA	NA	NA	NA	NA	XBXT10g002291	75.263	50.578	X	X	.	.	NA	NA	NA	NA	NA	NA	NA	NA	NA	NA	NA
c7orf26	L	gene16660	7.062	3.916	.	.	.	.	NA	NA	NA	NA	NA	NA	NA	XBXT10g008569	7.366	4.457	X	X	.	.	NA	NA	NA	NA	NA	NA	NA	NA	NA	NA	NA
c7orf57	L	gene11618	4.121	9.173	.	.	.	U	NA	NA	NA	NA	NA	NA	NA	XBXT10g018120	4.615	4.015	X	X	.	.	NA	NA	NA	NA	NA	NA	NA	NA	NA	NA	NA
c8a	L	gene12109	0	0	.	.	.	.	NA	NA	NA	NA	NA	NA	NA	XBXT10g018596	0.076	0.106	X	.	.	.	ENSDARG00000039516	c8a	0	0.074	0	.	.	.	.	.	.
c8b	L	gene10350	0	0	.	.	.	.	NA	NA	NA	NA	NA	NA	NA	XBXT10g012295	0	0.043	X	.	.	.	ENSDARG00000039517	c8b	1.285	0.513	0	X	.	.	.	.	.
c8g	S	NA	NA	NA	NA	NA	NA	NA	gene37178	0.208	0.369	.	.	.	.	XBXT10g016033	0.382	2.312	X	X	.	.	ENSDARG00000032098	c8g	0	0.125	0	.	.	.	.	.	.
c8orf33	L	gene11627	42.79	40.707	.	.	.	.	NA	NA	NA	NA	NA	NA	NA	XBXT10g008913	79.68	69.647	X	X	.	.	NA	NA	NA	NA	NA	NA	NA	NA	NA	NA	NA
c8orf34	LS	gene50795	0.364	0.527	.	.	.	.	gene35110	1.803	1.868	.	.	.	.	XBXT10g014718	0.101	0.219	X	.	.	.	NA	NA	NA	NA	NA	NA	NA	NA	NA	NA	NA
c8orf37	L	gene48569	25.342	25.428	.	.	.	.	NA	NA	NA	NA	NA	NA	NA	XBXT10g004416	43.426	30.383	.	X	NA	NA	NA	NA	NA	NA	NA	NA	NA	NA	NA	NA	NA
c8orf48	L	gene5877	15.996	11.353	.	.	.	.	NA	NA	NA	NA	NA	NA	NA	XBXT10g013974	10.999	12.004	X	X	.	.	NA	NA	NA	NA	NA	NA	NA	NA	NA	NA	NA
c8orf76	LS	gene12149	123.733	89.179	.	.	.	.	gene17885	75.354	72.633	.	.	.	.	XBXT10g000135	220.568	229.576	X	X	.	.	NA	NA	NA	NA	NA	NA	NA	NA	NA	NA	NA
c9	L	gene15477	28.878	0.151	X	.	U	.	NA	NA	NA	NA	NA	NA	NA	XBXT10g006016	2.746	1.482	X	X	.	.	ENSDARG00000016319	c9	0	0.146	0	.	.	.	.	.	.
c9orf135	S	NA	NA	NA	NA	NA	NA	NA	gene8962	0.308	0.689	.	.	.	.	XBXT10g014312	0.074	0.551	.	.	NA	NA	NA	NA	NA	NA	NA	NA	NA	NA	NA	NA	NA
c9orf64	L	gene3171	24.058	18.391	.	.	.	.	NA	NA	NA	NA	NA	NA	NA	XBXT10g001688	23.083	22.478	X	X	.	.	NA	NA	NA	NA	NA	NA	NA	NA	NA	NA	NA
c9orf72	L	gene4504	26.646	20.255	.	.	.	.	NA	NA	NA	NA	NA	NA	NA	XBXT10g005090	21.408	12.681	X	X	.	.	ENSDARG00000011837	C13H9orf72	19.241	18.142	3.96	X	.	.	.	.	.
c9orf78	L	gene13172	151.605	119.769	.	.	.	.	NA	NA	NA	NA	NA	NA	NA	XBXT10g014539	144.195	145.848	X	X	X	.	NA	NA	NA	NA	NA	NA	NA	NA	NA	NA	NA
c9orf85	LS	gene10342	8.944	5.412	.	.	.	.	gene14266	18.238	21.821	.	.	.	.	XBXT10g009452	180.502	160.125	X	X	X	.	NA	NA	NA	NA	NA	NA	NA	NA	NA	NA	NA
ca1	L	gene45152	0	0	.	.	.	.	NA	NA	NA	NA	NA	NA	NA	XBXT10g001957	0	0	X	.	.	.	NA	NA	NA	NA	NA	NA	NA	NA	NA	NA	NA
ca10	LS	gene16129	0.018	0.027	.	.	.	.	gene38530	26.551	32.958	.	.	.	.	XBXT10g005269	0.024	0.067	X	.	.	.	NA	NA	NA	NA	NA	NA	NA	NA	NA	NA	NA
ca11	LS	gene3938	0	0	.	.	.	.	gene4668	0.055	0	.	.	.	.	XBXT10g004057	1.972	2.038	X	X	.	.	NA	NA	NA	NA	NA	NA	NA	NA	NA	NA	NA
ca12	L	gene36693	110.517	78.597	.	.	.	.	NA	NA	NA	NA	NA	NA	NA	XBXT10g001276	73.449	51.001	X	X	X	D	NA	NA	NA	NA	NA	NA	NA	NA	NA	NA	NA
ca13	L	gene5383	0	0	.	.	.	.	NA	NA	NA	NA	NA	NA	NA	XBXT10g000531	0	0	X	.	.	.	NA	NA	NA	NA	NA	NA	NA	NA	NA	NA	NA
ca14	LS	gene44775	0.027	13.549	X	X	D	D	gene40231	0	0.454	X	X	U	D	XBXT10g010868	0.342	0.657	X	.	X	D	ENSDARG00000061697	ca14	0	0.129	0	.	.	.	.	.	.
ca2	LS	gene4819	0	0	.	.	.	.	gene18157	0.128	0.038	.	.	.	.	XBXT10g019775	0.035	0.098	X	.	.	.	ENSDARG00000014488	ca2	0	0.117	0	.	.	.	.	.	.
ca3	L	gene6841	0	0	.	.	.	.	NA	NA	NA	NA	NA	NA	NA	XBXT10g019419	0	0	X	.	.	.	NA	NA	NA	NA	NA	NA	NA	NA	NA	NA	NA
ca4.2	L	gene8265	0	0	.	.	.	.	NA	NA	NA	NA	NA	NA	NA	XBXT10g017411	0.048	0.134	X	.	.	.	NA	NA	NA	NA	NA	NA	NA	NA	NA	NA	NA
ca5b	L	gene6579	91.723	137.294	X	X	.	.	NA	NA	NA	NA	NA	NA	NA	XBXT10g018544	200.217	241.461	X	X	.	.	ENSDARG00000101778	ca5a	51.544	75.746	22.896	X	.	.	.	.	.
ca6	LS	gene9581	0.098	1.121	.	.	.	.	gene4436	0	0.033	.	.	.	.	XBXT10g000915	0.281	0.741	X	.	.	.	ENSDARG00000056499	ca6	0	0	0.25	.	.	.	.	.	.
ca7	LS	gene34419	0	0.022	.	.	.	.	gene46235	3.47	1.755	.	.	.	.	XBXT10g015158	0	0.274	X	.	.	.	ENSDARG00000045139	ca7	245.481	185.968	33.447	X	.	.	.	.	.
ca8	LS	gene2086	0	0	.	.	.	.	gene19953	0	0.026	.	.	.	.	XBXT10g005550	0.201	0.084	X	.	.	.	ENSDARG00000039098	ca8	1.928	2.826	1.474	X	.	.	.	.	.
ca9	L	gene48422	0	0	.	.	.	.	NA	NA	NA	NA	NA	NA	NA	XBXT10g018868	0	0.048	X	.	.	.	ENSDARG00000102300	ca9	0	7.493	85.147	X	X	X	X	X	X
caap1	LS	gene5469	57.417	64.458	.	.	.	.	gene8530	0	0.101	.	.	.	.	XBXT10g019339	238.892	230.923	X	X	.	.	NA	NA	NA	NA	NA	NA	NA	NA	NA	NA	NA
cab39	LS	gene15922	45.414	47.481	X	.	.	.	gene13353	23.176	19.259	.	.	.	.	XBXT10g004661	72.312	89.328	X	X	X	U	ENSDARG00000021374	cab39l1	122.605	151.257	56.401	X	.	.	.	.	.
cab39l	LS	gene448	17.941	19.312	.	.	.	.	gene19218	30.951	35.323	.	.	.	.	XBXT10g013004	33.741	32.753	X	X	.	.	ENSDARG00000036658	cab39l	124.584	158.975	42.387	X	.	.	X	.	.
cabcoco1	L	gene18198	5.68	1.61	.	.	.	.	NA	NA	NA	NA	NA	NA	NA	XBXT10g012049	0.598	0.973	X	.	.	.	ENSDARG00000086310	cabcoco1	2.958	2.53	2.462	X	.	.	X	.	.
cabin1	L	gene41810	16.003	15.713	.	.	.	.	NA	NA	NA	NA	NA	NA	NA	XBXT10g012219	9.089	9.905	X	X	.	.	ENSDARG00000079326	cabin1	12.972	9.146	5.964	X	.	.	X	.	.
cables1	LS	gene45846	18.744	15.711	.	.	.	.	gene8561	14.133	12.795	.	.	.	.	XBXT10g016009	25.929	22.727	X	X	.	.	NA	NA	NA	NA	NA	NA	NA	NA	NA	NA	NA
cables2	L	gene36534	22.061	18.357	X	X	U	.	NA	NA	NA	NA	NA	NA	NA	XBXT10g001523	19.881	18.761	X	X	X	.	NA	NA	NA	NA	NA	NA	NA	NA	NA	NA	NA
cabp1	LS	gene11013	1.713	1.595	.	.	.	.	gene14723	0.092	0.087	.	.	.	.	XBXT10g002993	0.027	0.038	X	.	.	.	ENSDARG00000019990, ENSDARG00000033411	cabp1a, cabp1b	0.431	0.197	0.512	.	.	.	.	.	.
cabp4	L	gene35132	0	0	.	.	.	.	NA	NA	NA	NA	NA	NA	NA	XBXT10g011496	25.385	29.292	X	X	X	U	ENSDARG00000008866	cabp4	0	0	0	.	.	.	.	.	.
cabp7	LS	gene861	0.086	0.062	.	.	.	.	gene11369	0.023	0	.	.	.	.	XBXT10g009006	0.059	0	X	.	.	.	NA	NA	NA	NA	NA	NA	NA	NA	NA	NA	NA
cachd1	LS	gene50739	51.157	48.901	X	X	.	.	gene34379	43.335	38.726	X	X	D	D	XBXT10g008248	65.456	68.314	X	X	.	.	NA	NA	NA	NA	NA	NA	NA	NA	NA	NA	NA
cacna1a	S	NA	NA	NA	NA	NA	NA	NA	gene8850	0.199	0.121	.	.	.	.	XBXT10g011483	1.426	1.318	X	X	.	.	ENSDARG00000006923, ENSDARG00000037905	cacna1ab, cacna1aa	4.571	2.592	0.969	X	.	.	.	.	.
cacna1c	LS	gene16978	0.122	0.205	.	.	U	.	gene19113	0.126	0.017	.	.	.	.	XBXT10g018615	1.817	1.709	X	X	.	.	ENSDARG00000008398	cacna1c	0	0.075	0.052	.	.	.	.	.	.
cacna1d	L	gene48116	0.05	0.082	.	.	.	.	NA	NA	NA	NA	NA	NA	NA	XBXT10g016491	0	0.08	X	.	.	.	ENSDARG00000075917, ENSDARG00000102773, ENSDARG00000101589, ENSDARG00000115603, ENSDARG00000110642	cacna1db, cacna1da, cacna1db, cacna1db, cacna1db	26.266	15.056	10.441	X	.	.	.	.	.
cacna1e	L	gene5674	0.503	0.008	.	.	.	.	NA	NA	NA	NA	NA	NA	NA	XBXT10g012189	0.877	0.982	X	.	.	.	NA	NA	NA	NA	NA	NA	NA	NA	NA	NA	NA
cacna1f	L	gene11991	0.229	0.077	.	.	.	U	NA	NA	NA	NA	NA	NA	NA	XBXT10g011801	0.051	0.043	X	.	.	.	ENSDARG00000023683, ENSDARG00000010933	cacna1fb, cacna1fa	5.422	7.565	0.899	X	.	.	.	.	.
cacna1g	L	gene10426	0.357	0.327	.	.	.	.	NA	NA	NA	NA	NA	NA	NA	XBXT10g008166	0.959	1.211	X	X	.	.	ENSDARG00000089913	cacna1g	0.309	0.352	0.092	.	.	.	.	.	.
cacna1h	L	gene43099	0.056	0.046	.	.	.	.	NA	NA	NA	NA	NA	NA	NA	XBXT10g004264	0.212	0.155	X	.	.	.	NA	NA	NA	NA	NA	NA	NA	NA	NA	NA	NA
cacna1i	LS	gene48762	6.919	9.442	.	.	.	.	gene1782	0.112	0.087	.	.	.	.	XBXT10g005157	2.019	1.127	X	X	.	.	ENSDARG00000070522	cacna1ia	19.094	13.83	2.341	X	.	.	.	.	.
cacna1s	S	NA	NA	NA	NA	NA	NA	NA	gene1014	1.302	1.316	.	.	.	D	XBXT10g006592	0.143	0.145	X	.	.	.	ENSDARG00000042552, ENSDARG00000029457	cacna1sb, cacna1sa	0.098	1.512	0.764	X	.	X	.	.	.
cacna2d1	LS	gene48712	8.497	9.153	.	.	.	.	gene20221	6.528	5.41	.	.	.	.	XBXT10g000083	7.496	7.693	X	X	.	.	NA	NA	NA	NA	NA	NA	NA	NA	NA	NA	NA
cacna2d2	LS	gene7292	0.319	0.533	.	.	.	.	gene2445	1.07	1.047	.	.	.	.	XBXT10g019077	1.046	1.085	X	X	.	.	ENSDARG00000103390	cacna2d2a	2.871	4.4	0	X	.	.	.	.	.
cacna2d3	LS	gene48032	1.959	2.039	.	.	.	.	gene49331	0.344	0.698	.	.	.	.	XBXT10g002389	0.16	0.223	X	.	.	.	ENSDARG00000078760	cacna2d3	3.726	6.413	1.887	X	.	.	.	.	.
cacnb1	LS	gene15291	0.137	0.056	.	.	.	.	gene12192	0.047	0.033	.	.	.	.	XBXT10g002615	0.123	0.229	X	.	.	.	ENSDARG00000002167	cacnb1	13.267	11.819	4.507	X	.	.	X	.	.
cacnb2	LS	gene49634	0.208	0.118	.	.	.	.	gene13693	5.416	2.802	.	.	.	.	XBXT10g008243	3.126	2.391	X	X	.	.	ENSDARG00000055565, ENSDARG00000099045	cacnb2b, cacnb2a	4.083	2.008	0.374	X	.	.	.	.	.
cacnb3	LS	gene44914	0.183	0.256	.	.	.	.	gene40687	0	0	.	.	.	.	XBXT10g001402	0.009	0.013	X	.	.	.	NA	NA	NA	NA	NA	NA	NA	NA	NA	NA	NA
cacng1	LS	gene3834	0.244	0.132	.	.	.	.	gene583	0	0	.	.	.	.	XBXT10g014043	0.047	0	X	.	.	.	ENSDARG00000052360, ENSDARG00000008772	cacng1b, cacng1a	0	0	0	.	.	.	.	.	.
cacng3	LS	gene821	0	1.14	.	.	.	U	gene14205	0.286	0.214	.	.	.	.	XBXT10g017812	0	0	X	.	.	.	NA	NA	NA	NA	NA	NA	NA	NA	NA	NA	NA
cacng4	LS	gene49655	0	0.074	.	.	.	.	gene38977	0	0.063	.	.	.	.	XBXT10g008669	0.97	1.806	X	X	.	.	ENSDARG00000074669, ENSDARG00000115540	cacng4b, cacng4a	0	0.152	0.633	.	.	.	.	.	.
cacng7	LS	gene39228	0.021	0	.	.	.	.	gene12776	0	0	.	.	.	.	XBXT10g006335	0	0.052	X	.	.	.	NA	NA	NA	NA	NA	NA	NA	NA	NA	NA	NA
cacng8	LS	gene45320	0	0.025	.	.	.	.	gene19019	0	0	.	.	.	.	XBXT10g008665	0	0	X	.	.	.	NA	NA	NA	NA	NA	NA	NA	NA	NA	NA	NA
cactin	LS	gene5087	79.565	77.832	X	.	U	.	gene5452	38.518	40.579	.	.	.	.	XBXT10g018816	89.211	109.914	X	X	.	.	ENSDARG00000059866	cactin	48.382	39.964	58.664	X	.	.	X	.	.
cacul1	LS	gene5093	41.484	38.57	X	X	.	.	gene20373	25.085	21.879	.	.	.	.	XBXT10g001325	20.894	18.044	X	X	.	.	NA	NA	NA	NA	NA	NA	NA	NA	NA	NA	NA
cacybp	LS	gene10819	16.743	21.068	X	.	.	.	gene15552	49.745	49.406	X	X	U	D	XBXT10g015298	173.286	137.064	X	X	X	U	ENSDARG00000014731	cacybp	146.319	117.966	50.802	X	.	.	.	.	.
cad	LS	gene5637	36.136	29.878	X	.	U	.	gene45476	0.204	0.377	.	.	.	.	XBXT10g008219	14.304	13.027	X	X	.	.	ENSDARG00000041895	cad	226.746	195.109	193.493	X	.	X	X	.	.
cadm1	LS	gene35019	34.67	32.862	X	X	U	D	gene17083	18.523	26.174	X	X	D	.	XBXT10g012866	63.564	68.785	X	X	.	.	ENSDARG00000042677, ENSDARG00000031075	cadm1b, cadm1a	8.348	5.018	1.743	X	.	.	.	.	.
cadm2	L	gene3959	0.067	0.1	.	.	.	.	NA	NA	NA	NA	NA	NA	NA	XBXT10g018901	0.099	0.092	X	.	.	.	ENSDARG00000009930, ENSDARG00000062633	cadm2a, cadm2b	1.901	0.775	0.814	X	.	.	.	.	.
cadm3	LS	gene3652	0.008	0	.	.	.	.	gene39482	0.012	0.032	.	.	.	.	XBXT10g015469	0.033	0.015	X	.	.	.	ENSDARG00000057013	cadm3	1.667	0.475	0.198	X	.	.	.	.	.
cadm4	LS	gene46462	0.802	0.269	.	.	.	.	gene38053	0	0.046	.	.	.	.	XBXT10g000475	0.204	0.158	X	.	.	.	ENSDARG00000040291	cadm4	0	0.121	0.252	.	.	.	X	.	.
cadps	L	gene42120	0.238	0.337	.	.	.	D	NA	NA	NA	NA	NA	NA	NA	XBXT10g014631	1.286	1.722	X	X	.	.	ENSDARG00000070567, ENSDARG00000043661	cadpsb, cadpsa	0.386	4.325	2.007	X	.	.	X	.	.
cadps2	LS	gene46541	21.593	19.558	.	.	.	.	gene49473	7.35	10.315	.	.	.	.	XBXT10g002210	36.552	47.84	X	X	.	.	ENSDARG00000013312	cadps2	28.737	19.15	8.618	X	.	.	.	.	.
calb1	LS	gene17094	0.048	0.024	.	.	.	.	gene48732	0.556	0.302	.	.	.	.	XBXT10g017009	0.298	0.312	X	.	.	.	ENSDARG00000031598	calb1	0	0.112	0	.	.	.	.	.	.
calb2	LS	gene19971	0.847	0.205	.	.	.	.	gene11476	0	0	.	.	.	.	XBXT10g016478	0.448	0.313	X	.	.	.	ENSDARG00000036344, ENSDARG00000041062	calb2b, calb2a	0	0	0	.	.	.	.	.	.
calcoco1	LS	gene8342	37.614	23.112	X	.	.	.	gene44063	17.581	16.4	.	.	.	.	XBXT10g002292	6.718	6.704	X	X	.	.	ENSDARG00000036695, ENSDARG00000016391	calcoco1a, calcoco1b	3.51	4.114	1.64	X	.	.	.	.	.
calcoco2	S	NA	NA	NA	NA	NA	NA	NA	gene17529	20.503	10.141	.	.	.	D	XBXT10g014764	34.452	22.864	X	X	.	.	ENSDARG00000052515	calcoco2	0.179	0.562	0.213	.	.	.	.	.	.
calcr	LS	gene49974	0.018	0.026	.	.	.	.	gene5495	0.873	0.132	.	.	.	.	XBXT10g002092	0.018	0.025	X	.	.	.	ENSDARG00000028845	calcr	0	0	0	.	.	.	.	.	.
calcrl	L	gene7032	9.11	0.793	.	.	.	.	NA	NA	NA	NA	NA	NA	NA	XBXT10g001712	14.709	13.095	X	X	.	.	NA	NA	NA	NA	NA	NA	NA	NA	NA	NA	NA
calhm2	LS	gene15388	30.446	30.358	.	.	.	.	gene17840	79.477	76.492	.	.	.	.	XBXT10g014849	64.282	79.586	X	X	.	.	ENSDARG00000039482	calhm2.1	0	0.032	0	.	.	.	.	.	.
calhm4	LS	gene16131	33.845	35.334	.	.	.	.	gene12996	0	0	.	.	.	.	XBXT10g012995	0.632	0.808	X	.	.	.	NA	NA	NA	NA	NA	NA	NA	NA	NA	NA	NA
calhm5	S	NA	NA	NA	NA	NA	NA	NA	gene693	0	0.701	X	X	U	.	XBXT10g006953	0	0	X	.	.	.	ENSDARG00000074947	calhm5.1	1.335	1.903	0.198	X	.	.	.	.	.
calhm6	L	gene10339	0	0	.	.	.	.	NA	NA	NA	NA	NA	NA	NA	XBXT10g006305	0	0	X	.	.	.	ENSDARG00000041980	calhm6	0	0	0	.	.	.	.	.	.
calm1	S	NA	NA	NA	NA	NA	NA	NA	gene15528	25.942	74.786	X	X	U	.	XBXT10g017898	195.796	232.061	X	X	X	U	ENSDARG00000034187, ENSDARG00000021811	calm1b, calm1a	345.365	350.586	222.233	X	.	.	.	.	.
calm2	LS	gene16771	341.222	363.029	X	X	.	.	gene3485	339.37	362.983	X	X	U	.	XBXT10g003908	364.271	369.171	X	X	.	.	ENSDARG00000031427, ENSDARG00000015050	calm2a, calm3a	254.351	292.744	473.137	X	.	.	X	.	.
calml4	LS	gene8046	2.801	7.421	.	.	.	U	gene16105	3.806	3.584	.	.	.	.	XBXT10g017200	0	0.169	X	.	.	.	ENSDARG00000075800, ENSDARG00000059347	calml4a, calml4b	1.2	3.806	1.07	X	.	.	.	.	.
caln1	LS	gene41293	0.472	0	.	.	.	.	gene49355	4.501	1.445	.	.	D	.	XBXT10g004304	14.293	17.218	X	X	.	.	ENSDARG00000088898	caln1	1.169	0.733	0.139	X	.	.	.	.	.
calr	LS	gene477	347.5	334.298	X	X	D	D	gene38918	190.528	199.949	X	X	.	.	XBXT10g008500	483.06	452.775	X	X	X	U	ENSDARG00000103979	calr3a	339.555	243.232	34.514	X	.	.	.	.	.
calr3	LS	gene3552	0.362	0.415	.	.	.	.	gene35318	0	0.491	.	.	.	.	XBXT10g015026	0.03	0.253	X	.	.	.	ENSDARG00000103979, ENSDARG00000102808	calr3a, calr3b	492.868	399.032	89.547	X	.	.	.	.	.
calu	LS	gene6188	45.288	48.684	X	.	U	.	gene47552	59.043	52.247	X	.	.	.	XBXT10g000924	211.815	236.942	X	X	.	.	ENSDARG00000045676, ENSDARG00000005115	calua, calub	291.441	322.416	135.679	X	.	.	.	.	.
camk1	LS	gene6609	12.622	14.649	.	.	.	.	gene45127	40.132	34.39	.	.	.	.	XBXT10g016995	36.281	45.976	X	X	.	.	NA	NA	NA	NA	NA	NA	NA	NA	NA	NA	NA
camk1d	LS	gene35123	7.206	4.179	.	.	.	.	gene16281	0.061	0.045	.	.	.	.	XBXT10g016053	4.287	4.763	X	X	.	.	ENSDARG00000074905, ENSDARG00000017446	camk1da, camk1db	1.632	0.388	0.081	X	.	.	.	.	.
camk1g	L	gene12883	0	0.113	.	.	.	.	NA	NA	NA	NA	NA	NA	NA	XBXT10g011055	0	0.024	X	.	.	.	ENSDARG00000008788, ENSDARG00000044526	camk1gb, camk1ga	0	0.258	0.269	.	.	.	.	.	.
camk2a	S	NA	NA	NA	NA	NA	NA	NA	gene49139	0.015	0.033	.	.	.	.	XBXT10g003139	0.189	0.263	X	.	X	D	ENSDARG00000053617	camk2a	0.303	0.086	0	.	.	.	.	.	.
camk2b	LS	gene14587	0	0	.	.	.	.	gene43449	0	0.038	.	.	.	.	XBXT10g007671	0.124	0.099	X	.	.	.	ENSDARG00000011065	camk2b1	7.788	8.073	2.766	X	.	.	.	.	.
camk2d	LS	gene7196	0.052	1.155	.	.	.	.	gene41884	16.422	19.072	.	.	.	.	XBXT10g002941	20.631	22.961	X	X	.	.	ENSDARG00000043010, ENSDARG00000014273	camk2d1, camk2d2	1.495	0.447	0.244	X	.	.	.	.	.
camk2g	LS	gene16544	28.337	23.766	.	.	.	.	gene35258	46.425	38.344	.	.	.	.	XBXT10g010661	52.142	46.982	X	X	.	.	ENSDARG00000071395	camk2g1	81.439	84.045	34.783	X	.	.	X	.	.
camk2n2	LS	gene40102	0	0.093	.	.	.	.	gene7405	0.42	0.044	.	.	.	.	XBXT10g008364	0	0	X	.	.	.	ENSDARG00000111102	camk2n2	0	0	0	.	.	.	.	.	.
camk4	LS	gene46271	0	2.647	.	.	.	.	gene17394	0	0	.	.	.	.	XBXT10g005818	0	0	X	.	.	.	ENSDARG00000005372	camk4	2.064	2.68	1.227	X	.	.	.	.	.
camkk1	S	NA	NA	NA	NA	NA	NA	NA	gene7899	23.359	23.023	.	.	.	.	XBXT10g010939	6.043	6.046	X	X	.	.	ENSDARG00000015134, ENSDARG00000035452	camkk1b, camkk1a	43	29.844	4.74	X	.	.	.	.	.
camkk2	LS	gene19921	4.998	3.125	.	.	.	D	gene4966	6.032	7.166	.	.	.	.	XBXT10g018472	0.585	0.496	X	.	.	.	NA	NA	NA	NA	NA	NA	NA	NA	NA	NA	NA
camkmt	L	gene7636	23.735	20.976	.	.	.	.	NA	NA	NA	NA	NA	NA	NA	XBXT10g014323	5.955	6.84	X	X	.	.	NA	NA	NA	NA	NA	NA	NA	NA	NA	NA	NA
camkv	L	gene1455	0.781	0.045	.	.	.	.	NA	NA	NA	NA	NA	NA	NA	XBXT10g000731	0.35	0.326	X	.	.	.	ENSDARG00000005141, ENSDARG00000027963	camkvb, camkva	0	0.117	0.305	.	.	.	.	.	.
camlg	L	gene15087	18.623	17.992	.	.	.	.	NA	NA	NA	NA	NA	NA	NA	XBXT10g009070	132.559	149.887	X	X	X	D	ENSDARG00000100409	camlg	85.236	86.97	30.165	X	.	.	.	.	.
camsap1	S	NA	NA	NA	NA	NA	NA	NA	gene37945	65.087	50.026	.	.	.	.	XBXT10g016916	8.481	10.36	X	X	.	.	ENSDARG00000019208, ENSDARG00000035122	camsap1a, camsap1b	129.795	97.243	8.016	X	.	.	X	.	.
camsap2	S	NA	NA	NA	NA	NA	NA	NA	gene13504	3.027	2.989	.	.	.	.	XBXT10g006949	23.513	29.418	X	X	.	.	ENSDARG00000062173, ENSDARG00000059965	camsap2a, camsap2b	11.506	8.666	128.362	X	.	.	X	.	.
camsap3	L	gene37833	71.006	53.102	X	X	.	D	NA	NA	NA	NA	NA	NA	NA	XBXT10g018428	3.882	4.239	X	X	X	D	ENSDARG00000059475	camsap3	34.71	17.025	9.82	X	.	.	X	.	.
camta2	LS	gene2817	21.111	17.927	.	.	.	.	gene48972	11.576	9.702	.	.	.	.	XBXT10g006275	26.06	22.702	X	X	.	.	ENSDARG00000092799	camta2	5.196	1.975	0.343	X	.	.	.	.	.
cand1	L	gene47836	118.068	129.621	.	.	.	.	NA	NA	NA	NA	NA	NA	NA	XBXT10g001206	160.228	193.65	X	X	.	.	ENSDARG00000017841	cand1	117.651	119.894	70.909	X	.	X	X	.	.
cant1	L	gene8508	60.174	61.162	.	.	.	.	NA	NA	NA	NA	NA	NA	NA	XBXT10g001390	175.306	202.96	X	X	X	.	ENSDARG00000102977, ENSDARG00000012192	cant1b, cant1a	48.518	61.845	65.813	X	.	.	X	.	.
canx	LS	gene42840	143.563	155.314	X	X	U	.	gene3002	133.072	134.717	X	.	U	.	XBXT10g019128	206.857	290.728	X	X	X	U	ENSDARG00000037488	canx	166.638	145.536	104.215	X	.	.	X	.	.
cap1	LS	gene16946	29.136	32.715	.	.	.	.	gene5812	41.48	35.945	.	.	.	.	XBXT10g006638	27.984	25.629	X	X	X	D	ENSDARG00000016350	cap1	70.926	86.479	18.785	X	.	.	X	.	.
cap2	LS	gene8642	4.064	7.218	.	.	.	D	gene15045	0	0	.	.	.	.	XBXT10g012439	0	0.03	X	.	.	.	ENSDARG00000104478	cap2	3.725	2.23	1.107	X	.	.	.	.	.
capg	L	gene2022	1.897	2.064	.	.	.	U	NA	NA	NA	NA	NA	NA	NA	XBXT10g017323	0.236	2.971	X	X	X	.	ENSDARG00000099672, ENSDARG00000035560	capgb, capga	9.44	14.481	9.856	X	.	.	.	.	.
capn1	LS	gene18880	18.381	17.094	.	.	.	.	gene39819	11.754	14.071	.	.	.	.	XBXT10g005058	49.475	43.78	X	X	.	.	ENSDARG00000052748, ENSDARG00000052702	capn1b, capn1a	45.902	50.333	37.53	X	.	.	.	.	.
capn10	L	gene380	24.65	6.795	.	.	.	.	NA	NA	NA	NA	NA	NA	NA	XBXT10g007836	36.022	34.478	X	X	.	.	ENSDARG00000076634	capn10	6.405	5.417	1.904	X	.	.	.	.	.
capn10l	LS	gene19959	0.121	0	.	.	.	.	gene41035	0	0	.	.	.	.	XBXT10g002675	0	0.083	X	.	.	.	NA	NA	NA	NA	NA	NA	NA	NA	NA	NA	NA
capn11	LS	gene12444	9.142	9.234	.	.	.	.	gene16631	5.592	10.614	.	.	.	D	XBXT10g008555	29.507	22.486	X	X	.	.	NA	NA	NA	NA	NA	NA	NA	NA	NA	NA	NA
capn12	L	gene8297	2.047	3.293	.	.	.	.	NA	NA	NA	NA	NA	NA	NA	XBXT10g012237	5.877	3.51	X	X	.	.	ENSDARG00000010758	capn12	0.447	0.128	3.058	X	.	.	.	.	.
capn13	LS	gene17825	0.43	0.088	.	.	.	.	gene13942	0	0.09	.	.	.	.	XBXT10g016988	0.458	0.841	X	.	X	.	NA	NA	NA	NA	NA	NA	NA	NA	NA	NA	NA
capn15	LS	gene5769	36.51	30.141	.	.	.	.	gene12001	14.451	10.267	.	.	.	D	XBXT10g011475	8.076	9.458	X	X	.	.	NA	NA	NA	NA	NA	NA	NA	NA	NA	NA	NA
capn2	LS	gene7119	8.452	6.783	.	.	.	.	gene5922	2.34	1.166	.	.	.	U	XBXT10g016373	27.09	25.657	X	X	.	.	ENSDARG00000055592, ENSDARG00000091699	capn2b, capn2a	8.636	10.839	9.417	X	.	.	.	.	.
capn3	L	gene19856	2.098	2.446	.	.	.	.	NA	NA	NA	NA	NA	NA	NA	XBXT10g006510	0.021	0.03	X	.	.	.	ENSDARG00000041864, ENSDARG00000077009	capn3a, wdfy4	65.039	41.283	9.247	X	.	.	.	.	.
capn5	LS	gene13658	37.644	22.756	.	.	.	.	gene6648	24.189	13.951	.	.	.	.	XBXT10g010869	73.693	74.824	X	X	.	.	NA	NA	NA	NA	NA	NA	NA	NA	NA	NA	NA
capn6	L	gene18864	0	0.008	.	.	.	.	NA	NA	NA	NA	NA	NA	NA	XBXT10g000094	0.378	0.33	X	.	.	.	NA	NA	NA	NA	NA	NA	NA	NA	NA	NA	NA
capn7	L	gene2553	24.933	18.28	.	.	.	.	NA	NA	NA	NA	NA	NA	NA	XBXT10g000560	32.63	25.918	X	X	.	.	NA	NA	NA	NA	NA	NA	NA	NA	NA	NA	NA
capn8.1	LS	gene38688	0	0.558	.	.	.	.	gene41400	0	0.1	.	.	.	.	XBXT10g011122	0.095	1.229	X	X	X	D	ENSDARG00000055715	capn8	0	0.146	21.591	X	.	.	X	.	.
capn8.3	L	gene10470	2.455	6.62	.	.	.	.	NA	NA	NA	NA	NA	NA	NA	XBXT10g015051	0.49	0.47	.	.	NA	NA	ENSDARG00000055715	capn8	0	0.146	21.591	X	.	.	X	.	.
capn8.5	L	gene48320	0.027	0	.	.	.	.	NA	NA	NA	NA	NA	NA	NA	XBXT10g016652	0	0	.	.	NA	NA	ENSDARG00000055715	capn8	0	0.146	21.591	X	.	.	X	.	.
capn8.6	S	NA	NA	NA	NA	NA	NA	NA	gene21602	0	0	.	.	.	.	XBXT10g004242	0	0.223	.	.	NA	NA	ENSDARG00000055715	capn8	0	0.146	21.591	X	.	.	X	.	.
capn9	LS	gene36159	0.024	0	.	.	.	.	gene48020	0	0	.	.	.	.	XBXT10g001499	87.227	83.003	X	X	.	.	ENSDARG00000012341	capn9	0	0.768	144.888	X	.	.	X	.	.
capns1	LS	gene37746	4.903	7.438	.	.	.	.	gene18638	0.149	0.068	.	.	.	.	XBXT10g020893	0.337	0.799	X	.	X	U	ENSDARG00000035329, ENSDARG00000013804	capns1a, capns1b	184.474	181.555	161.989	X	.	.	X	.	.
capns2	LS	gene9565	49.967	60.462	.	.	U	.	gene12350	23.031	29.91	.	.	.	.	XBXT10g004533	267.388	268.237	X	X	.	.	NA	NA	NA	NA	NA	NA	NA	NA	NA	NA	NA
caprin1	LS	gene7819	356.31	304.984	X	X	.	D	gene9547	226.131	203.816	.	.	.	U	XBXT10g002447	56.159	60.314	X	X	.	.	ENSDARG00000009346, ENSDARG00000054272	caprin1a, caprin1b	235.143	219.059	183.599	X	.	.	X	.	.
caprin2	L	gene20383	223.514	225.006	.	.	U	U	NA	NA	NA	NA	NA	NA	NA	XBXT10g008251	63.668	41.315	X	X	.	.	ENSDARG00000020749	caprin2	395.267	240.224	64.495	X	.	.	.	.	.
caps	LS	gene8130	0.026	0	.	.	.	.	gene3977	0.744	0.483	.	.	.	.	XBXT10g010808	0.379	0.433	X	.	.	.	NA	NA	NA	NA	NA	NA	NA	NA	NA	NA	NA
caps2	L	gene15033	9.895	7.289	.	.	.	.	NA	NA	NA	NA	NA	NA	NA	XBXT10g010039	12.054	10.69	X	X	.	.	ENSDARG00000058486	caps2	0	0.554	0	.	.	.	.	.	.
capsl	LS	gene10497	0.76	1.72	.	.	.	.	gene18910	0	0.153	.	.	.	.	XBXT10g006161	6.673	6.082	X	X	.	.	ENSDARG00000103521, ENSDARG00000003414	capsla, capslb	1.245	0.887	0	X	.	.	.	.	.
capza1	L	gene3460	86.714	95.368	.	.	.	.	NA	NA	NA	NA	NA	NA	NA	XBXT10g017663	234.593	263.666	X	X	.	.	ENSDARG00000034240, ENSDARG00000056090	capza1a, capza1b	119.244	142.244	107.382	X	.	.	X	.	.
capza2	LS	gene15387	54.956	49.772	X	.	.	.	gene14350	92.743	83.394	X	.	U	.	XBXT10g015571	415.536	425.807	X	X	.	.	NA	NA	NA	NA	NA	NA	NA	NA	NA	NA	NA
capzb	LS	gene18478	63.664	46.834	.	.	.	.	gene35881	91.862	44.983	.	.	.	.	XBXT10g019690	5.036	4.511	X	X	.	.	ENSDARG00000100252	capzb	136.196	162.979	113.453	X	.	.	.	.	.
card14	L	gene49567	0	0.024	.	.	.	.	NA	NA	NA	NA	NA	NA	NA	XBXT10g006885	0	0.056	X	.	.	.	ENSDARG00000103485	card14	0.146	0.042	0.043	.	.	.	.	.	.
card19	L	gene9753	4.745	7.978	.	.	.	D	NA	NA	NA	NA	NA	NA	NA	XBXT10g019261	4.921	4.853	X	X	.	.	ENSDARG00000091304	card19	4.609	0.899	1.875	X	.	.	.	.	.
card9	LS	gene6985	0.081	0.161	.	.	.	.	gene50388	0	0.076	.	.	.	.	XBXT10g016255	0.08	0.037	X	.	.	.	ENSDARG00000067672	card9	0	0.089	1.296	X	.	.	.	.	.
carf	L	gene14441	16.834	22.063	.	.	.	.	NA	NA	NA	NA	NA	NA	NA	XBXT10g010258	20.562	19.291	X	X	X	U	ENSDARG00000019950	carf	17.573	13.819	10.688	X	.	.	X	.	.
carhsp1	LS	gene9000	2.325	0.033	.	.	.	.	gene3414	17.206	23.202	X	X	U	.	XBXT10g015790	129.018	100.654	X	X	X	U	ENSDARG00000053129	carhsp1	20.007	7.678	13.497	X	.	.	X	.	.
carm1	S	NA	NA	NA	NA	NA	NA	NA	gene49708	61.812	62.178	X	.	.	.	XBXT10g007661	6.773	7.496	X	X	X	.	ENSDARG00000018698	carm1	66.44	47.81	68.862	X	.	X	X	.	.
carm1p1	LS	gene1868	51.629	54.998	.	.	.	.	gene20593	0	0.089	.	.	.	.	XBXT10g007345	0	0.065	X	.	.	.	ENSDARG00000091531	carm1l	0	0	0.483	.	.	.	.	.	.
carmil1	LS	gene3059	34.804	37.184	.	.	.	.	gene16555	12.817	5.606	.	.	.	.	XBXT10g019552	22.077	27.481	X	X	.	.	ENSDARG00000103887	carmil1	0	0.468	5.364	X	.	.	.	.	.
carnmt1	S	NA	NA	NA	NA	NA	NA	NA	gene7790	49.998	54.6	.	.	.	.	XBXT10g011173	96.689	110.803	X	X	.	.	ENSDARG00000102865	carnmt1	24.396	27.708	7.137	X	.	.	.	.	.
carns1	L	gene4587	0.048	0.021	.	.	.	.	NA	NA	NA	NA	NA	NA	NA	XBXT10g001747	6.646	5.879	X	X	.	.	NA	NA	NA	NA	NA	NA	NA	NA	NA	NA	NA
cars1	S	NA	NA	NA	NA	NA	NA	NA	gene45948	28.519	24.446	.	.	.	.	XBXT10g009485	60.179	48.813	X	X	.	.	ENSDARG00000036164	cars1	48.642	34.164	27.93	X	.	.	.	.	.
cars2	L	gene12266	49.913	25.825	.	.	.	.	NA	NA	NA	NA	NA	NA	NA	XBXT10g000043	27.633	12.684	X	X	.	.	ENSDARG00000078546	cars2	41.233	22.821	3.502	X	.	.	.	.	.
cartpt	L	gene42889	0	0	.	.	.	.	NA	NA	NA	NA	NA	NA	NA	XBXT10g003321	4.851	2.539	X	X	.	.	NA	NA	NA	NA	NA	NA	NA	NA	NA	NA	NA
casc3	LS	gene19258	41.426	35.434	X	X	.	D	gene13162	64.166	46.558	.	.	.	.	XBXT10g009806	64.694	64.813	X	X	X	U	ENSDARG00000029911	casc3	162.265	139.492	132.099	X	.	X	X	.	.
casd1	LS	gene42126	22.66	15.892	.	.	.	.	gene10066	2.633	1.558	.	.	.	.	XBXT10g013795	9.737	6.055	X	X	.	.	ENSDARG00000023900	casd1	366.619	185.414	11.816	X	.	.	.	.	.
cask	LS	gene13294	52.892	42.52	.	.	.	.	gene8101	72.766	71.126	.	.	.	.	XBXT10g010405	57.688	70.86	X	X	.	.	ENSDARG00000100119, ENSDARG00000059809	caskb, caska	50.653	46.768	9.889	X	.	.	X	.	.
caskin1	LS	gene35520	1.843	1.987	.	.	.	D	gene42290	0.671	1.712	.	.	.	.	XBXT10g008212	0.057	0.064	X	.	.	.	ENSDARG00000046107	caskin1	0	0.032	0.045	.	.	.	.	.	.
caskin2	LS	gene5355	0.584	0.066	.	.	.	.	gene15942	3.225	1.165	.	.	.	.	XBXT10g009074	0.643	1.009	X	X	.	.	NA	NA	NA	NA	NA	NA	NA	NA	NA	NA	NA
casp1	LS	gene17293	0	0	.	.	.	.	gene19399	0.082	0	.	.	.	.	XBXT10g006970	0.235	0.393	X	.	.	.	ENSDARG00000052039	caspb	0	0.094	0	.	.	.	.	.	.
casp10	LS	gene6248	11.693	20.392	.	.	.	.	gene15804	17.298	15.082	.	.	.	.	XBXT10g006549	26.053	30.769	X	X	.	.	ENSDARG00000070272	casp10	13.298	21.835	3.163	X	.	.	.	.	.
casp2	L	gene19516	29.027	10.602	X	.	U	.	NA	NA	NA	NA	NA	NA	NA	XBXT10g012449	26.431	25.436	X	X	.	.	ENSDARG00000062052	casp2	27.357	27.531	5.523	X	.	.	.	.	.
casp3.2	LS	gene49124	43.421	55.099	.	.	.	.	gene4660	30.487	34.561	X	.	U	D	XBXT10g017869	66.833	80.399	X	X	X	.	ENSDARG00000055045, ENSDARG00000017905	casp3b, casp3a	131.194	151.651	61.569	X	.	.	.	.	.
casp6	L	gene47128	18.643	32.913	.	.	.	.	NA	NA	NA	NA	NA	NA	NA	XBXT10g017360	87.791	87.617	X	X	.	.	ENSDARG00000093405, ENSDARG00000025608	casp6a, casp6b.1	4.052	6.374	6.909	X	.	.	.	.	.
casp7	LS	gene7273	113.462	8.588	.	.	.	.	gene35826	65.953	73.816	.	.	.	.	XBXT10g017304	20.022	18.378	X	X	.	.	ENSDARG00000091836	casp7	0.427	0.67	0.508	.	.	.	.	.	.
casp8	L	gene38234	0	0	.	.	.	.	NA	NA	NA	NA	NA	NA	NA	XBXT10g012537	0.069	0.097	X	.	.	.	ENSDARG00000058325	casp8	23.36	32.617	5.323	X	.	.	.	.	.
casp8ap2	L	gene11288	51.814	41.536	.	.	.	.	NA	NA	NA	NA	NA	NA	NA	XBXT10g019816	162.423	121.064	X	X	.	.	ENSDARG00000022718	casp8ap2	152.704	65.631	48.277	X	.	.	.	.	.
casp9	S	NA	NA	NA	NA	NA	NA	NA	gene37246	27.389	25.817	.	.	.	.	XBXT10g001046	28.248	22.648	X	X	.	.	ENSDARG00000004325	casp9	30.077	28.335	6.642	X	.	.	.	.	.
casq1	S	NA	NA	NA	NA	NA	NA	NA	gene9768	0	0	.	.	.	.	XBXT10g010877	0	0	X	.	.	.	NA	NA	NA	NA	NA	NA	NA	NA	NA	NA	NA
casq2	S	NA	NA	NA	NA	NA	NA	NA	gene43786	0	0	.	.	.	.	XBXT10g003883	0	0	.	.	NA	NA	ENSDARG00000008982	casq2	0	0	0	.	.	.	.	.	.
casr	LS	gene5963	0	0	.	.	.	.	gene13663	0	0.012	.	.	.	.	XBXT10g005594	0.062	0.109	X	.	.	.	ENSDARG00000013649	casr	0.806	0.643	0.479	.	.	.	.	.	.
cass4	LS	gene4208	0.077	6.539	X	X	D	D	gene19988	0	1.029	X	X	U	D	XBXT10g009970	0.073	3.79	X	X	X	.	NA	NA	NA	NA	NA	NA	NA	NA	NA	NA	NA
cast	LS	gene44505	77.619	56.931	.	.	.	.	gene14235	49.476	64.216	.	.	.	.	XBXT10g001228	52.817	56.735	X	X	.	.	ENSDARG00000058693	cast	44.49	39.457	38.129	X	X	X	X	.	X
castor1	L	gene41270	59.828	66.358	.	.	.	.	NA	NA	NA	NA	NA	NA	NA	XBXT10g006483	31.229	30.523	X	X	.	.	ENSDARG00000107096	castor1	0	0	0	.	.	.	.	.	.
castor2	L	gene18088	17.669	12.931	.	.	.	.	NA	NA	NA	NA	NA	NA	NA	XBXT10g002366	23.445	20.771	X	X	.	.	ENSDARG00000018985	castor2	86.328	86.692	96.308	X	.	X	X	.	.
casz1	LS	gene38495	0.033	0.063	.	.	.	.	gene19450	0.061	4.864	.	.	.	.	XBXT10g010665	0.606	0.756	X	.	.	.	NA	NA	NA	NA	NA	NA	NA	NA	NA	NA	NA
cat.1	L	gene4138	0.017	0.099	.	.	.	.	NA	NA	NA	NA	NA	NA	NA	XBXT10g006185	148.654	169.706	X	X	.	.	ENSDARG00000104702	cat	160.486	98.21	19.036	X	.	.	.	.	.
cat.2	LS	gene501	50.141	57.605	.	.	.	.	gene39885	38.98	54.424	.	.	.	.	XBXT10g010977	32.733	31.628	X	X	.	.	ENSDARG00000104702	cat	160.486	98.21	19.036	X	.	.	.	.	.
cat.3	LS	gene14288	0.376	0.142	.	.	.	D	gene38558	0.08	0	.	.	.	.	XBXT10g000333	0.087	0.122	.	.	NA	NA	ENSDARG00000104702	cat	160.486	98.21	19.036	X	.	.	.	.	.
cat1	L	gene4870	0.072	0.204	.	.	.	.	NA	NA	NA	NA	NA	NA	NA	XBXT10g018092	0.081	0.265	X	.	.	.	NA	NA	NA	NA	NA	NA	NA	NA	NA	NA	NA
cat2	LS	gene5426	0.545	0.204	.	.	.	.	gene17481	0	0	.	.	.	.	XBXT10g015327	0.381	0.443	X	.	.	.	NA	NA	NA	NA	NA	NA	NA	NA	NA	NA	NA
catip	L	gene5515	0	0.053	.	.	.	.	NA	NA	NA	NA	NA	NA	NA	XBXT10g016253	0	0.146	X	.	.	.	ENSDARG00000063009	catip	2.174	1.487	0.517	X	.	.	.	.	.
cav1	LS	gene11844	0.022	0	.	.	U	D	gene2772	0.147	0	.	.	.	.	XBXT10g019503	0	0.339	X	.	.	.	ENSDARG00000103747	cav1	0.153	0.044	0.273	.	.	.	.	.	.
cav2	LS	gene15624	13.502	12.107	.	.	.	.	gene12162	1.843	2.146	.	.	U	U	XBXT10g009442	5.358	3.31	X	X	X	D	ENSDARG00000052000	cav2	0	0.5	0.626	.	.	.	.	.	.
cav3.1	L	gene35596	0	0	.	.	.	.	NA	NA	NA	NA	NA	NA	NA	XBXT10g006359	0.273	0.169	.	.	NA	NA	ENSDARG00000024141	cav3	0	0.503	0	.	.	.	.	.	.
cav3.2	LS	gene19710	0	0	.	.	.	.	gene16984	0	0	.	.	.	.	XBXT10g001786	0	0	X	.	.	.	ENSDARG00000024141	cav3	0	0.503	0	.	.	.	.	.	.
cavin1	LS	gene42260	0.054	0.037	.	.	.	.	gene10803	0.014	0	.	.	.	.	XBXT10g002481	0	0.036	X	.	.	.	ENSDARG00000059362, ENSDARG00000076411	cavin1b, cavin1a	0.833	0.119	0.124	.	.	.	.	.	.
cavin2	LS	gene1011	0	0	.	.	.	.	gene19146	0.015	0.15	.	.	.	.	XBXT10g005582	0.085	0.238	X	.	.	.	ENSDARG00000071196, ENSDARG00000027611	cavin2b, cavin2a	0.993	1.157	10.566	X	.	.	X	.	.
cavin4	S	NA	NA	NA	NA	NA	NA	NA	gene9066	0	0	.	.	.	.	XBXT10g009153	0	0	X	.	.	.	ENSDARG00000056743, ENSDARG00000038658	cavin4b, cavin4a	0	0.132	0.275	.	.	.	.	.	.
cbarp	LS	gene16728	0.215	7.127	X	X	D	.	gene47350	0.538	0.07	.	.	.	.	XBXT10g009136	0.772	1.235	X	X	.	.	NA	NA	NA	NA	NA	NA	NA	NA	NA	NA	NA
cbfa2t2	LS	gene46202	5.378	14.677	.	.	.	D	gene36811	0.055	0.248	.	.	.	D	XBXT10g012314	6.014	4.988	X	X	.	.	ENSDARG00000074337	cbfa2t2	0	0.316	8.309	X	X	X	X	X	X
cbfa2t3	LS	gene17099	0.145	0.131	.	.	.	.	gene10667	2.643	0.699	.	.	.	D	XBXT10g014008	0.046	0.064	X	.	.	.	NA	NA	NA	NA	NA	NA	NA	NA	NA	NA	NA
cbfb	LS	gene13267	26.563	38.188	.	.	.	.	gene17562	67.355	71.234	X	.	U	.	XBXT10g014627	92.189	112.177	X	X	X	U	ENSDARG00000040917	cbfb	0.144	0.246	0.342	.	.	.	.	.	.
cbl	LS	gene46605	80.22	49.218	X	X	U	D	gene7058	12.277	13.415	.	.	.	.	XBXT10g010998	31.422	36.881	X	X	X	.	ENSDARG00000015199, ENSDARG00000009958	cblb, cbl	31.433	16.61	5.652	X	.	.	X	.	.
cblb	LS	gene46495	2.091	0.459	.	.	.	D	gene50110	0.167	0.287	.	.	.	.	XBXT10g010013	4.361	5.401	X	X	.	.	ENSDARG00000015199	cblb	4.949	2.769	0.49	X	.	.	.	.	.
cblc	LS	gene22868	0.183	0	.	.	.	.	gene16212	0	0	.	.	.	.	XBXT10g019149	0	0	.	.	NA	NA	ENSDARG00000078217	cblc	0	0.078	4.711	X	.	.	X	.	.
cbll1	LS	gene4643	33.171	23.794	.	.	.	.	gene2301	93.809	76.301	X	.	.	.	XBXT10g000452	5.667	5.896	X	X	X	U	ENSDARG00000015222	cbll1	15.634	4.631	4.556	X	.	.	.	.	.
cbln1	L	gene11300	0.283	0.369	.	.	.	.	NA	NA	NA	NA	NA	NA	NA	XBXT10g002605	0.061	0.341	X	.	.	.	ENSDARG00000057296	cbln1	1.745	3.184	0.623	X	.	.	.	.	.
cbln2	LS	gene15503	0.048	0.133	.	.	.	.	gene17068	0	0	.	.	.	.	XBXT10g003924	0	0.622	X	.	.	.	ENSDARG00000077151, ENSDARG00000074601	cbln2b, cbln2a	0	0.26	0.542	.	.	.	.	.	.
cbln4	L	gene7168	1.431	1.025	.	.	.	U	NA	NA	NA	NA	NA	NA	NA	XBXT10g011972	0	0	X	.	.	.	ENSDARG00000061240	cbln4	0.831	0.355	0.247	.	.	.	.	.	.
cbm20 [provisional]	LS	gene19393	0	0	.	.	.	.	gene25059	0	0	.	.	.	.	XBXT10g013365	0	0	.	.	NA	NA	NA	NA	NA	NA	NA	NA	NA	NA	NA	NA	NA
cbr1.1	LS	gene36486	48.75	37.934	.	.	.	.	gene11724	11.332	6.6	.	.	U	.	XBXT10g009004	0	0	X	.	.	.	ENSDARG00000036587	cbr1	51.841	41.857	22.854	X	.	.	.	.	.
cbr1.2	LS	gene47221	0.367	0.147	.	.	.	.	gene13351	16.302	2.519	.	.	U	.	XBXT10g012491	0	0	.	.	NA	NA	ENSDARG00000036587	cbr1	51.841	41.857	22.854	X	.	.	.	.	.
cbr1.3	L	gene37364	0.911	0.251	.	.	.	.	NA	NA	NA	NA	NA	NA	NA	XBXT10g007328	0.147	0	X	.	.	.	ENSDARG00000036587	cbr1	51.841	41.857	22.854	X	.	.	.	.	.
cbr4	L	gene20128	33.45	21.473	.	.	.	U	NA	NA	NA	NA	NA	NA	NA	XBXT10g007655	17.989	17.877	X	X	.	.	ENSDARG00000009074	cbr4	7.456	10.252	5.737	X	.	.	.	.	.
cbs	LS	gene18688	66.703	74.468	X	X	U	.	gene14496	47.404	38.769	.	.	.	.	XBXT10g016567	74.724	64.011	X	X	X	U	ENSDARG00000053500, ENSDARG00000010946	cbsa, cbsb	38.91	37.206	65.427	X	.	X	X	.	.
cbwd1.1	LS	gene13078	44.759	33.895	.	.	.	.	gene3112	79.034	44.53	.	.	.	.	XBXT10g016184	137.213	79.525	X	X	.	.	NA	NA	NA	NA	NA	NA	NA	NA	NA	NA	NA
cbwd2	L	gene17399	43.89	33.596	.	.	.	.	NA	NA	NA	NA	NA	NA	NA	XBXT10g005568	32.461	23.618	X	X	.	.	ENSDARG00000004318	cbwd	10.865	8.466	1.938	X	.	.	.	.	.
cbx1	LS	gene4970	1.333	0.834	.	.	.	.	gene19359	2.191	3.883	.	.	.	.	XBXT10g003873	112.209	119.387	X	X	X	U	ENSDARG00000004189, ENSDARG00000054442	cbx1a, cbx1b	306.163	295.076	461.537	X	.	X	X	.	.
cbx2	LS	gene11813	58.912	70.02	X	.	.	.	gene41028	112.345	115.059	.	.	.	.	XBXT10g014214	85.223	99.368	X	X	X	U	ENSDARG00000044938	cbx2	137.576	196.009	239.239	X	.	X	X	.	.
cbx3	LS	gene20281	164.312	200.046	X	X	D	D	gene10796	253.101	268.045	X	.	U	.	XBXT10g009175	447.056	535.813	X	X	X	D	ENSDARG00000092158, ENSDARG00000003860	cbx3b, cbx3a	366.129	436.309	483.107	X	X	X	X	.	.
cbx4	LS	gene20528	1.874	3.174	.	.	.	D	gene18328	96.216	63.507	X	.	.	.	XBXT10g010059	182.941	86.788	X	X	.	.	ENSDARG00000099441	cbx4	2.251	1.818	1.115	X	.	.	.	.	.
cbx5	LS	gene14119	22.633	22.301	X	X	.	D	gene4940	61.262	52.962	X	X	D	D	XBXT10g018628	48.839	53.846	X	X	X	D	ENSDARG00000061187	cbx5	210.991	336.988	315.774	X	X	X	X	.	.
cbx6	LS	gene14989	13.342	18.659	.	.	.	.	gene16337	4.282	2.049	.	.	.	.	XBXT10g000299	15.315	9.076	X	X	.	.	ENSDARG00000097543, ENSDARG00000071051	cbx6b, cbx6a	1.783	1.316	1.302	X	.	.	.	.	.
cbx7	LS	gene15557	4.558	6.07	.	.	.	.	gene4502	7.851	4.972	.	.	.	.	XBXT10g007898	24.299	11.32	X	X	.	.	NA	NA	NA	NA	NA	NA	NA	NA	NA	NA	NA
cbx8	LS	gene5393	2.347	2.71	.	.	D	D	gene35912	89.941	36.201	.	.	D	.	XBXT10g002059	119.137	43.67	X	X	.	.	ENSDARG00000098771, ENSDARG00000087327	cbx8b, cbx8a	91.903	38.627	3.005	X	.	.	.	.	.
cby1	S	NA	NA	NA	NA	NA	NA	NA	gene38507	49.843	39.816	.	.	.	.	XBXT10g010854	78.236	75.215	X	X	.	.	ENSDARG00000077409	cby1	29.855	22.172	70.847	X	.	.	X	.	.
cc2d1a	L	gene19047	8.456	6.115	.	.	.	.	NA	NA	NA	NA	NA	NA	NA	XBXT10g005784	14.432	11.979	X	X	.	.	NA	NA	NA	NA	NA	NA	NA	NA	NA	NA	NA
cc2d1b	LS	gene1189	12.6	14.678	.	.	.	D	gene12186	16.784	17.963	.	.	.	.	XBXT10g000681	55.294	48.711	X	X	.	.	ENSDARG00000099445	cc2d1b	33.867	21.089	3.366	X	.	.	X	.	.
cc2d2a	L	gene6155	26.675	27.28	.	.	.	.	NA	NA	NA	NA	NA	NA	NA	XBXT10g006110	46.887	32.232	X	X	.	.	ENSDARG00000090971	cc2d2a	6.496	9.378	4.323	X	.	.	X	.	.
ccar1	LS	gene3767	20.289	21.546	.	.	.	.	gene18504	5.525	2.122	.	.	.	.	XBXT10g008267	17.705	20.473	X	X	.	.	ENSDARG00000074759	ccar1	8.087	5.259	7.362	X	.	.	.	.	.
ccdc102a	LS	gene2892	7.87	11.907	.	.	.	D	gene14721	17.83	10.808	.	.	.	.	XBXT10g013824	42.244	31.783	X	X	.	.	ENSDARG00000003872	ccdc102a	133.784	63.842	6.667	X	.	.	.	.	.
ccdc103	L	gene48484	7.813	5.602	.	.	.	.	NA	NA	NA	NA	NA	NA	NA	XBXT10g008987	33.013	12.989	X	X	.	.	ENSDARG00000053455	ccdc103	0	2.086	4.35	X	.	.	X	.	.
ccdc105	S	NA	NA	NA	NA	NA	NA	NA	gene3731	0	0	.	.	.	.	XBXT10g002620	5.491	3.864	X	X	.	.	ENSDARG00000054136	ccdc105	1.14	2.707	0.452	X	.	.	.	.	.
ccdc106	LS	gene38069	0.136	0	.	.	.	.	gene39607	0.165	0.02	.	.	.	.	XBXT10g008406	0	0	X	.	.	.	ENSDARG00000058578, ENSDARG00000004211	ccdc106b, ccdc106a	127.772	93.006	16.488	X	.	.	.	.	.
ccdc107	L	gene2074	40.854	29.172	.	.	.	.	NA	NA	NA	NA	NA	NA	NA	XBXT10g023342	52.749	43.323	X	X	.	.	NA	NA	NA	NA	NA	NA	NA	NA	NA	NA	NA
ccdc112	L	gene48530	9.651	9.188	.	.	.	.	NA	NA	NA	NA	NA	NA	NA	XBXT10g015368	82.298	98.386	X	X	.	.	NA	NA	NA	NA	NA	NA	NA	NA	NA	NA	NA
ccdc113	L	gene49886	2.266	1.645	.	.	.	.	NA	NA	NA	NA	NA	NA	NA	XBXT10g000821	1.697	1.184	X	X	.	.	ENSDARG00000006981	ccdc113	0	0.149	0.622	.	.	.	.	.	.
ccdc12	LS	gene17031	78.769	86.637	.	.	U	.	gene17817	13.289	18.732	.	.	.	.	XBXT10g014140	110.795	133.221	X	X	X	U	ENSDARG00000023003	ccdc12	77.375	68.844	43.68	X	.	X	X	.	.
ccdc122	L	gene36230	0	0	.	.	.	.	NA	NA	NA	NA	NA	NA	NA	XBXT10g013094	2.81	0.549	X	X	.	.	NA	NA	NA	NA	NA	NA	NA	NA	NA	NA	NA
ccdc124	LS	gene3858	58.541	50.879	.	.	.	.	gene6035	38.791	34.741	.	.	.	.	XBXT10g001406	94.888	82.797	X	X	.	.	ENSDARG00000043502	ccdc124	173.112	175.257	21.19	X	.	.	.	.	.
ccdc125	LS	gene6455	2.137	3.611	.	.	.	U	gene12811	19.119	20.412	.	.	.	.	XBXT10g000606	4.303	3.326	X	X	.	.	ENSDARG00000056477	ccdc125	1.603	0.228	0.477	X	.	.	.	.	.
ccdc126	S	NA	NA	NA	NA	NA	NA	NA	gene17821	11.273	12.062	.	.	.	.	XBXT10g012145	31.59	28.8	X	X	.	.	ENSDARG00000062695	ccdc126	28.772	14.932	0.658	X	.	.	.	.	.
ccdc127	LS	gene5334	13.696	17.999	.	.	.	.	gene12728	2.936	5.243	.	.	.	.	XBXT10g012055	52.531	52.321	X	X	.	.	ENSDARG00000008946, ENSDARG00000104344	ccdc127b, ccdc127a	12.29	6.998	0.537	X	.	.	.	.	.
ccdc13	L	gene13825	2.463	2.023	.	.	.	.	NA	NA	NA	NA	NA	NA	NA	XBXT10g004311	1.083	1.23	X	X	.	.	NA	NA	NA	NA	NA	NA	NA	NA	NA	NA	NA
ccdc134	LS	gene18110	63.203	52.512	.	.	.	.	gene5969	7.344	6.059	.	.	.	.	XBXT10g019378	48.105	45.206	X	X	.	.	NA	NA	NA	NA	NA	NA	NA	NA	NA	NA	NA
ccdc136	S	NA	NA	NA	NA	NA	NA	NA	gene14402	0	0	.	.	.	.	XBXT10g008250	0.46	0.816	X	.	.	.	NA	NA	NA	NA	NA	NA	NA	NA	NA	NA	NA
ccdc138	L	gene463	101.793	71.253	.	.	D	.	NA	NA	NA	NA	NA	NA	NA	XBXT10g009986	143.363	95.853	X	X	.	.	NA	NA	NA	NA	NA	NA	NA	NA	NA	NA	NA
ccdc141	LS	gene4150	0.058	0.083	.	.	.	.	gene49707	0.112	0.092	.	.	.	.	XBXT10g003416	0.03	0.062	X	.	.	.	ENSDARG00000095675	ccdc141	0.09	0.256	0.373	.	.	.	.	.	.
ccdc146	L	gene1891	0.892	0.692	.	.	.	U	NA	NA	NA	NA	NA	NA	NA	XBXT10g003490	2.055	2.309	X	X	.	.	ENSDARG00000004794	ccdc146	4.264	5.621	1.479	X	.	.	.	.	.
ccdc148	L	gene4541	3.736	4.154	.	.	.	.	NA	NA	NA	NA	NA	NA	NA	XBXT10g010769	0.318	0.494	X	.	.	.	NA	NA	NA	NA	NA	NA	NA	NA	NA	NA	NA
ccdc149	LS	gene14600	18.097	8.633	.	.	.	.	gene10674	27.592	35.697	.	.	.	.	XBXT10g017785	23.225	23.325	X	X	.	.	ENSDARG00000078829, ENSDARG00000020857	ccdc149a, ccdc149b	50.966	28.085	2.015	X	.	.	.	.	.
ccdc15	S	NA	NA	NA	NA	NA	NA	NA	gene6765	51.229	44.365	.	.	.	.	XBXT10g006863	141.744	139.108	X	X	.	.	NA	NA	NA	NA	NA	NA	NA	NA	NA	NA	NA
ccdc150	L	gene47563	21.156	16.706	.	.	.	D	NA	NA	NA	NA	NA	NA	NA	XBXT10g015353	5.991	5.727	X	X	.	.	NA	NA	NA	NA	NA	NA	NA	NA	NA	NA	NA
ccdc155l	LS	gene6578	0	0	.	.	.	.	gene9828	0	0.072	.	.	.	.	XBXT10g014653	1.094	0.814	.	X	NA	NA	NA	NA	NA	NA	NA	NA	NA	NA	NA	NA	NA
ccdc160	L	gene15447	0.079	0.075	.	.	.	.	NA	NA	NA	NA	NA	NA	NA	XBXT10g002505	9.471	13.735	X	X	.	.	ENSDARG00000075492	ccdc160	34.524	39.366	11.196	X	.	.	.	.	.
ccdc167	S	NA	NA	NA	NA	NA	NA	NA	gene19205	43.007	35.487	.	.	U	.	XBXT10g004015	100.179	40.799	X	X	.	.	ENSDARG00000045850	ccdc167	27.547	11.168	3.276	X	.	.	.	.	.
ccdc169	S	NA	NA	NA	NA	NA	NA	NA	gene14470	5.913	7.432	.	.	.	.	XBXT10g009589	9.975	2.258	X	X	.	.	NA	NA	NA	NA	NA	NA	NA	NA	NA	NA	NA
ccdc17	L	gene10394	0.046	0.145	.	.	.	.	NA	NA	NA	NA	NA	NA	NA	XBXT10g007757	0	0.174	X	.	.	.	ENSDARG00000090480	ccdc17	0	0.067	0.278	.	.	.	.	.	.
ccdc170	L	gene16410	2.441	0.038	.	.	.	U	NA	NA	NA	NA	NA	NA	NA	XBXT10g009820	5.61	7.853	X	X	.	.	ENSDARG00000016161	ccdc170	0.202	0	0	.	.	.	.	.	.
ccdc172	L	gene19592	0	0	.	.	.	.	NA	NA	NA	NA	NA	NA	NA	XBXT10g013521	3.601	2.75	X	X	.	.	ENSDARG00000039937	ccdc172	34.984	21.715	8.723	X	.	.	.	.	.
ccdc173	L	gene1760	0.309	0.808	.	.	.	.	NA	NA	NA	NA	NA	NA	NA	XBXT10g005860	1.059	1.795	.	X	NA	NA	ENSDARG00000077928	ccdc173	0	0.127	0.133	.	.	.	.	.	.
ccdc174	S	NA	NA	NA	NA	NA	NA	NA	gene17811	81.197	52.635	.	.	.	.	XBXT10g004862	50.399	40.306	X	X	.	.	ENSDARG00000023858	ccdc174	110.098	103.136	53.337	X	.	.	.	.	.
ccdc177	L	gene45415	0.023	0.017	.	.	.	.	NA	NA	NA	NA	NA	NA	NA	XBXT10g026819	0.026	0.146	X	.	.	.	NA	NA	NA	NA	NA	NA	NA	NA	NA	NA	NA
ccdc18	LS	gene8580	118.321	69.858	.	.	.	.	gene4581	38.515	28.909	.	.	.	.	XBXT10g001980	62.677	54.032	X	X	.	.	ENSDARG00000078822	ccdc18	50.501	50.817	5.742	X	.	.	.	.	.
ccdc181	L	gene6182	1.989	4.063	.	.	.	.	NA	NA	NA	NA	NA	NA	NA	XBXT10g010966	10.675	70.415	X	X	X	.	ENSDARG00000062021	ccdc181	0.687	1.076	0	X	.	.	.	.	.
ccdc186	L	gene2375	85.583	71.702	.	.	.	.	NA	NA	NA	NA	NA	NA	NA	XBXT10g001965	95.088	88.65	X	X	.	.	ENSDARG00000061020	ccdc186	58.971	31.675	20.198	X	.	.	X	.	.
ccdc189	S	NA	NA	NA	NA	NA	NA	NA	gene545	8.192	5.138	.	.	.	.	XBXT10g009189	1.054	0.981	.	X	NA	NA	NA	NA	NA	NA	NA	NA	NA	NA	NA	NA	NA
ccdc191	L	gene17459	19.555	11.45	.	.	.	.	NA	NA	NA	NA	NA	NA	NA	XBXT10g019983	7.591	5.092	X	X	.	.	ENSDARG00000027851	ccdc191	6.831	7.839	0.521	X	.	.	.	.	.
ccdc22	LS	gene50891	21.058	16.855	.	.	.	.	gene832	26.182	22.943	.	.	.	.	XBXT10g000076	5.89	5.029	X	X	.	.	ENSDARG00000052379	ccdc22	121.931	116.3	33.443	X	.	.	.	.	.
ccdc24	L	gene16426	0.241	0.224	.	.	.	D	NA	NA	NA	NA	NA	NA	NA	XBXT10g012949	44.231	43.222	X	X	.	.	ENSDARG00000038793	ccdc24	0.983	0.14	0.439	.	.	.	.	.	.
ccdc25	LS	gene12701	103.797	91.2	.	.	.	.	gene4231	19.612	18.471	.	.	.	.	XBXT10g003154	104.134	71.384	X	X	.	.	ENSDARG00000021753	ccdc25	37.669	34.504	40.014	X	.	.	.	.	.
ccdc28a	S	NA	NA	NA	NA	NA	NA	NA	gene2364	78.551	77.879	.	.	.	.	XBXT10g009294	12.069	11.366	X	X	X	.	ENSDARG00000022983, ENSDARG00000091471	ccdc28a, ccdc28a	1.011	0.645	4.658	X	.	.	.	.	.
ccdc28b	L	gene6937	6.287	27.92	.	.	U	.	NA	NA	NA	NA	NA	NA	NA	XBXT10g015262	96.848	111.284	X	X	X	U	NA	NA	NA	NA	NA	NA	NA	NA	NA	NA	NA
ccdc3	L	gene14868	33.864	44.467	X	X	U	D	NA	NA	NA	NA	NA	NA	NA	XBXT10g000417	29.184	26.915	X	X	.	.	ENSDARG00000026052, ENSDARG00000030632	ccdc3a, ccdc3b	0.233	0.066	0	.	.	.	.	.	.
ccdc30	L	gene6778	28.518	33.204	.	.	.	.	NA	NA	NA	NA	NA	NA	NA	XBXT10g006121	18.572	22.5	X	X	.	.	ENSDARG00000056961	ccdc30	18.458	9.646	4.246	X	.	.	.	.	.
ccdc32	L	gene15277	10.53	12.532	.	.	.	.	NA	NA	NA	NA	NA	NA	NA	XBXT10g013190	43.174	42.841	X	X	.	.	ENSDARG00000073962	ccdc32	43.531	57.228	49.023	X	.	.	.	.	.
ccdc33	L	gene48670	0.118	0.191	.	.	.	.	NA	NA	NA	NA	NA	NA	NA	XBXT10g016205	0.094	0.24	X	.	.	.	ENSDARG00000051858	ccdc33	0	0.06	1.622	X	.	.	.	.	.
ccdc34	S	NA	NA	NA	NA	NA	NA	NA	gene19356	29.257	27.423	.	.	.	.	XBXT10g015895	23.657	28.104	X	X	.	.	NA	NA	NA	NA	NA	NA	NA	NA	NA	NA	NA
ccdc39	L	gene14162	2.414	4.191	.	.	.	.	NA	NA	NA	NA	NA	NA	NA	XBXT10g008567	0.54	0.656	X	.	.	.	NA	NA	NA	NA	NA	NA	NA	NA	NA	NA	NA
ccdc40	S	NA	NA	NA	NA	NA	NA	NA	gene14418	5.614	6.396	.	.	.	.	XBXT10g013265	0.222	0.093	X	.	.	.	ENSDARG00000100584	ccdc40	3.375	3.545	2.746	X	.	.	.	.	.
ccdc43	L	gene46188	56.45	37.178	.	.	.	.	NA	NA	NA	NA	NA	NA	NA	XBXT10g011878	137.165	91.113	X	X	X	.	ENSDARG00000054446	ccdc43	49.676	54.751	40.483	X	.	.	.	.	.
ccdc47	LS	gene11489	40.234	37.132	X	.	U	.	gene7442	92.083	82.325	.	.	.	.	XBXT10g005135	172.925	216.197	X	X	X	U	ENSDARG00000054362	ccdc47	55.724	70.072	55.343	X	.	.	.	.	.
ccdc50	LS	gene43416	49.615	48.499	.	.	.	.	gene13079	73.509	57.134	.	.	.	.	XBXT10g005034	44.218	53.655	X	X	X	.	ENSDARG00000105136	ccdc50	70.439	60.069	19.909	X	.	.	X	.	.
ccdc51	S	NA	NA	NA	NA	NA	NA	NA	gene6671	33.098	33.34	X	.	.	.	XBXT10g006742	30.778	28.52	X	X	.	.	ENSDARG00000058828	ccdc51	17.49	19.883	7.517	X	.	.	.	.	.
ccdc56	L	gene7142	31.409	15.482	.	.	.	.	NA	NA	NA	NA	NA	NA	NA	XBXT10g002855	56.992	35.625	X	X	X	.	NA	NA	NA	NA	NA	NA	NA	NA	NA	NA	NA
ccdc57	L	gene48872	12.782	13.081	.	.	.	.	NA	NA	NA	NA	NA	NA	NA	XBXT10g020015	8.791	10.153	X	X	.	.	ENSDARG00000087657	fasn	38.081	30.965	29.474	X	.	.	X	.	.
ccdc59	L	gene10915	88.01	67.441	X	.	.	.	NA	NA	NA	NA	NA	NA	NA	XBXT10g015498	132.668	62.243	X	X	X	U	ENSDARG00000045755	ccdc59	24.603	13.345	50.792	X	.	.	X	.	.
ccdc6	LS	gene1401	50.642	41.663	.	.	.	.	gene15840	75.322	76.608	X	.	.	.	XBXT10g009072	103.482	117.385	X	X	.	.	ENSDARG00000043334, ENSDARG00000017595	ccdc6a, ccdc6b	84.411	73.679	20.903	X	.	X	X	.	.
ccdc61	L	gene5566	60.915	48.884	X	.	.	.	NA	NA	NA	NA	NA	NA	NA	XBXT10g017971	185.688	136.046	X	X	.	.	ENSDARG00000062307	ccdc61	99.125	108.022	11.677	X	.	.	.	.	.
ccdc62	L	gene11843	12.423	24.24	.	.	.	.	NA	NA	NA	NA	NA	NA	NA	XBXT10g000169	87.62	62.376	X	X	.	.	ENSDARG00000111759	ccdc62	25.552	25.135	7.275	X	.	.	.	.	.
ccdc63	L	gene46200	0.975	0.596	.	.	.	.	NA	NA	NA	NA	NA	NA	NA	XBXT10g018210	4.899	4.797	X	X	.	.	NA	NA	NA	NA	NA	NA	NA	NA	NA	NA	NA
ccdc65	LS	gene12070	0.098	0.142	.	.	.	.	gene13606	3.495	3.678	.	.	.	.	XBXT10g009371	3.756	3.002	X	X	.	.	ENSDARG00000032005	ccdc65	2.737	0.223	0	X	.	.	.	.	.
ccdc68	LS	gene19033	0.646	0.402	.	.	.	.	gene9689	66.23	60.409	.	.	.	.	XBXT10g009625	71.697	57.826	X	X	.	.	NA	NA	NA	NA	NA	NA	NA	NA	NA	NA	NA
ccdc69	LS	gene18715	60.023	45.372	.	.	.	.	gene12022	32.6	33.473	.	.	.	.	XBXT10g001409	131.465	105.37	X	X	.	.	NA	NA	NA	NA	NA	NA	NA	NA	NA	NA	NA
ccdc71	LS	gene18668	25.246	24.839	X	.	D	.	gene14672	34.93	34.215	.	.	.	.	XBXT10g001647	185.683	169.636	X	X	X	U	NA	NA	NA	NA	NA	NA	NA	NA	NA	NA	NA
ccdc71l	LS	gene19583	107.394	111.155	.	.	.	.	gene20109	53.355	22.771	.	.	.	.	XBXT10g004083	107.144	69.361	X	X	X	.	NA	NA	NA	NA	NA	NA	NA	NA	NA	NA	NA
ccdc77	L	gene7689	37.962	42.442	.	.	.	.	NA	NA	NA	NA	NA	NA	NA	XBXT10g013657	16.776	16.888	X	X	.	.	ENSDARG00000102145	ccdc77	141.168	162.596	59.636	X	.	.	.	.	.
ccdc78	S	NA	NA	NA	NA	NA	NA	NA	gene5813	0.052	0.107	.	.	.	.	XBXT10g006907	0	0	X	.	.	.	ENSDARG00000030095	ccdc78	0	0	0.078	.	.	.	.	.	.
ccdc80	L	gene611	0.073	0.055	.	.	.	.	NA	NA	NA	NA	NA	NA	NA	XBXT10g002335	11.025	13.187	X	X	.	.	ENSDARG00000000002	ccdc80	0.46	0.59	0.137	.	.	.	.	.	.
ccdc81	L	gene14564	0	0	.	.	.	.	NA	NA	NA	NA	NA	NA	NA	XBXT10g015554	0.503	0.766	X	.	.	.	NA	NA	NA	NA	NA	NA	NA	NA	NA	NA	NA
ccdc82	L	gene8507	29.522	26.214	.	.	.	.	NA	NA	NA	NA	NA	NA	NA	XBXT10g013353	35.42	24.384	X	X	X	.	ENSDARG00000014966	ccdc82	207.557	217.84	27.245	X	.	.	X	.	.
ccdc85a	LS	gene44243	0.034	0	.	.	.	.	gene44517	0	0	.	.	.	.	XBXT10g012791	0	0	X	.	.	.	ENSDARG00000039497	ccdc85a	0	0	0.14	.	.	.	.	.	.
ccdc85b	LS	gene15426	0.031	0	.	.	.	.	gene9515	0.424	0.283	.	.	.	.	XBXT10g004076	0	0	X	.	.	.	ENSDARG00000061543	ccdc85b	1.468	5.943	5.412	X	.	.	.	.	.
ccdc85c	LS	gene41334	12.378	8.582	.	.	.	.	gene17233	6.883	4.573	.	.	.	.	XBXT10g016748	8.521	2.525	X	X	.	.	ENSDARG00000079555, ENSDARG00000005232	ccdc85cb, ccdc85ca	16.509	9.434	3.524	X	.	X	X	.	.
ccdc88a	L	gene44429	58.859	56.303	.	.	.	.	NA	NA	NA	NA	NA	NA	NA	XBXT10g002156	18.918	24.513	X	X	.	.	NA	NA	NA	NA	NA	NA	NA	NA	NA	NA	NA
ccdc89	L	gene40249	6.205	8.159	.	.	.	.	NA	NA	NA	NA	NA	NA	NA	XBXT10g017834	8.816	16.547	X	X	.	.	NA	NA	NA	NA	NA	NA	NA	NA	NA	NA	NA
ccdc9	LS	gene20490	114.031	108.549	X	.	U	.	gene18559	71.746	78.107	.	.	.	.	XBXT10g010996	97.202	114.141	X	X	.	.	ENSDARG00000004636	ccdc9	86.905	84.213	68.311	X	.	.	X	.	.
ccdc92	LS	gene40922	1.117	0.885	.	.	.	.	gene4494	11.264	8.519	.	.	.	.	XBXT10g004586	0.129	3.574	X	X	X	D	ENSDARG00000041750	ccdc92	6.377	3.333	0.542	X	.	.	.	.	.
ccdc93	L	gene1875	41.311	30.689	.	.	.	.	NA	NA	NA	NA	NA	NA	NA	XBXT10g010961	2.847	2.594	X	X	.	.	ENSDARG00000040678	ccdc93	60.239	56.13	8.678	X	.	.	.	.	.
ccdc97	L	gene5771	43.166	30.4	.	.	.	.	NA	NA	NA	NA	NA	NA	NA	XBXT10g001193	21.722	20.808	X	X	.	.	ENSDARG00000074703	ccdc97	15.811	15.673	20.511	X	.	.	.	.	.
cchcr1	L	gene15016	52.472	57.106	X	.	U	.	NA	NA	NA	NA	NA	NA	NA	XBXT10g013900	97.117	99.3	X	X	.	.	NA	NA	NA	NA	NA	NA	NA	NA	NA	NA	NA
cck	LS	gene10137	0	0	.	.	.	.	gene4975	0.17	0.345	.	.	.	.	XBXT10g018008	0.097	0	X	.	.	.	ENSDARG00000070810, ENSDARG00000100052	ccka, cckb	0	0	0.574	.	.	.	.	.	.
cckar	L	gene3882	0.299	0.727	.	.	.	D	NA	NA	NA	NA	NA	NA	NA	XBXT10g015502	0.043	0.03	X	.	.	.	NA	NA	NA	NA	NA	NA	NA	NA	NA	NA	NA
cckbr	LS	gene47301	0	0	.	.	.	.	gene38800	0	0	.	.	.	.	XBXT10g004877	0.098	0.245	.	.	NA	NA	NA	NA	NA	NA	NA	NA	NA	NA	NA	NA	NA
ccl20	LS	gene13499	0	0.067	.	.	.	.	gene15688	0	0	.	.	.	.	XBXT10g005346	0	0	X	.	.	.	ENSDARG00000094511	ccl20b	0	0	0	.	.	.	.	.	.
ccl4	L	gene13651	0	0	.	.	.	.	NA	NA	NA	NA	NA	NA	NA	XBXT10g000931	132.452	98.812	X	X	.	.	NA	NA	NA	NA	NA	NA	NA	NA	NA	NA	NA
ccl5	LS	gene11486	0.482	0.964	.	.	.	.	gene9289	0	0	.	.	.	.	XBXT10g004457	0	0.198	X	.	.	.	NA	NA	NA	NA	NA	NA	NA	NA	NA	NA	NA
ccm2	S	NA	NA	NA	NA	NA	NA	NA	gene3554	27.618	22.333	.	.	.	.	XBXT10g013738	9.882	7.886	X	X	.	.	ENSDARG00000013705	ccm2	63.743	68.336	26.157	X	.	X	X	.	.
ccm2l	L	gene6105	0.036	0.032	.	.	.	.	NA	NA	NA	NA	NA	NA	NA	XBXT10g007293	0	0.036	X	.	.	.	ENSDARG00000063089	ccm2l	0.535	0.061	0.064	.	.	.	.	.	.
ccn1	LS	gene19097	36.141	43.23	.	.	D	.	gene39886	73.678	53.983	.	.	D	D	XBXT10g010574	152.385	76.104	X	X	.	.	ENSDARG00000099985	ccn1l2	0	0.041	4.667	X	.	.	X	.	.
ccn1l	LS	gene13894	0.027	0.075	.	.	.	.	gene7437	0.032	0	.	.	U	.	XBXT10g011119	0.587	0.455	.	.	NA	NA	NA	NA	NA	NA	NA	NA	NA	NA	NA	NA	NA
ccn2	L	gene20510	1.144	0.107	.	.	.	.	NA	NA	NA	NA	NA	NA	NA	XBXT10g014814	0	0	X	.	.	.	ENSDARG00000042934, ENSDARG00000104292	ccn2a, ccn2b	0.379	0	0	.	.	.	.	.	.
ccn3	LS	gene7558	0.565	1.656	.	.	.	.	gene41367	0.153	0.87	.	.	.	.	XBXT10g000182	0.852	0.77	X	.	.	.	NA	NA	NA	NA	NA	NA	NA	NA	NA	NA	NA
ccn4	LS	gene39224	0	0	.	.	.	.	gene46803	0.674	0.228	.	.	.	.	XBXT10g019818	0.026	0.147	X	.	.	.	NA	NA	NA	NA	NA	NA	NA	NA	NA	NA	NA
ccn5	LS	gene16598	0.033	0.087	.	.	.	.	gene5558	0	0	.	.	.	.	XBXT10g000972	0	0.082	X	.	.	.	ENSDARG00000077882	ccn5	0	0	0	.	.	.	.	.	.
ccn6	L	gene37533	0	0	.	.	.	.	NA	NA	NA	NA	NA	NA	NA	XBXT10g008355	0.065	10.724	X	X	X	.	ENSDARG00000071048	ccn6	0	0	0	.	.	.	.	.	.
ccna1	LS	gene1949	1128.92	1306.03	.	.	.	.	gene6889	1125.11	1297.93	.	.	.	.	XBXT10g008853	2048.8	2062.89	X	X	.	.	ENSDARG00000043236	ccna1	973.435	1302.27	99.019	X	.	.	.	.	.
ccna2	LS	gene9078	491.129	526.815	X	X	D	D	gene1546	334.448	339.897	X	.	U	.	XBXT10g013741	932.807	1148.32	X	X	X	.	ENSDARG00000011094	ccna2	499.228	570.77	478.367	X	X	X	X	.	.
ccnb1	LS	gene18634	908.225	1109.25	.	.	.	.	gene50752	1002.9	1207.01	.	.	.	.	XBXT10g017491	2375.23	2603.07	X	X	.	.	ENSDARG00000051923	ccnb1	2076.38	2389.55	751.309	X	.	.	X	.	.
ccnb1.2	LS	gene8397	993.37	1231.38	X	X	.	D	gene20026	617.644	502.997	X	.	U	.	XBXT10g006181	3349.59	4275.68	X	X	X	U	ENSDARG00000051923	ccnb1	2076.38	2389.55	751.309	X	.	.	X	.	.
ccnb1ip1	L	gene18254	0.389	0.591	.	.	.	.	NA	NA	NA	NA	NA	NA	NA	XBXT10g002462	1.046	1.321	X	X	.	.	NA	NA	NA	NA	NA	NA	NA	NA	NA	NA	NA
ccnb2	LS	gene19329	822.435	961.985	X	.	U	.	gene12948	1036.57	1133.1	X	.	.	.	XBXT10g018205	2449.64	2788.77	X	X	X	U	ENSDARG00000036180	ccnb2	1510.33	1718.53	278.897	X	X	X	X	.	.
ccnb3	LS	gene5379	30.439	33.442	X	X	.	.	gene17012	58.515	27.623	X	X	D	D	XBXT10g003962	173.641	187.36	X	X	X	D	ENSDARG00000034855	ccnb3	58.819	36.373	86.678	X	.	X	X	.	.
ccnc	L	gene1495	118.851	70.01	.	.	.	.	NA	NA	NA	NA	NA	NA	NA	XBXT10g015265	195.933	161.429	X	X	.	.	ENSDARG00000009607	ccnc	92.989	110.401	48.571	X	.	.	X	.	.
ccnd1	LS	gene38199	0.098	1.598	.	.	.	.	gene8842	0.59	5.336	X	X	U	D	XBXT10g007164	102.27	129.904	X	X	X	U	ENSDARG00000101637	ccnd1	1.336	79.235	409.75	X	X	X	X	X	X
ccnd2	LS	gene13866	30.13	37.174	.	.	.	.	gene4181	29.875	33.59	.	.	.	U	XBXT10g010377	40.291	45.406	X	X	X	D	NA	NA	NA	NA	NA	NA	NA	NA	NA	NA	NA
ccndbp1	LS	gene4973	0	0	.	.	.	.	gene171	21.374	23.411	.	.	.	.	XBXT10g009269	38.271	34.419	X	X	.	.	ENSDARG00000039328	ccndbp1	51.161	75.654	18.134	X	.	.	X	.	.
ccndx	L	gene50256	2.328	4.117	X	X	U	D	NA	NA	NA	NA	NA	NA	NA	XBXT10g011711	193.655	161.361	X	X	.	.	ENSDARG00000019741	ccndx	0	0.249	0.259	.	.	.	.	.	.
ccne1	LS	gene4820	140.614	113.994	X	X	U	.	gene323	267.386	216.282	X	.	U	.	XBXT10g009769	496.225	586.274	X	X	X	.	ENSDARG00000098622	ccne1	525.19	638.526	414.071	X	X	X	X	.	.
ccne2	LS	gene11302	15.742	80.525	X	X	D	D	gene41395	33.656	66.538	X	X	D	D	XBXT10g002374	51.11	355.175	X	X	X	D	ENSDARG00000098529	ccne2	3.627	13.182	185.907	X	X	X	X	.	X
ccnf	LS	gene5622	68.67	47.026	X	X	U	D	gene47132	95.413	56.482	X	X	U	D	XBXT10g013896	138.376	123.757	X	X	X	U	ENSDARG00000105046	ccnf	9.996	13.047	104.157	X	.	X	X	.	.
ccng1	LS	gene14278	0.209	2.988	X	.	U	.	gene8018	54.004	39.287	X	.	U	.	XBXT10g007837	42.56	38.201	X	X	X	U	ENSDARG00000076667	ccng1	707.969	949.21	920.052	X	.	X	X	.	.
ccng2	LS	gene20073	101.848	72.379	.	.	.	.	gene7553	45.489	32.89	X	.	U	.	XBXT10g014751	13.723	15.8	X	X	X	U	ENSDARG00000017602	ccng2	1.103	8.396	30.248	X	.	X	X	.	.
ccnh	L	gene16614	96.099	108.575	.	.	.	.	NA	NA	NA	NA	NA	NA	NA	XBXT10g002504	168.508	163.242	X	X	.	.	ENSDARG00000007657	ccnh	172.501	114.125	35.924	X	.	.	X	.	.
ccni	LS	gene1589	15.592	16.527	.	.	.	.	gene2962	7.105	18.692	.	.	.	.	XBXT10g018649	8.749	8.845	X	X	.	.	ENSDARG00000068214	ccni	72.699	60.935	22.901	X	.	.	X	.	.
ccni2	LS	gene8008	29.471	32.12	X	.	.	.	gene6614	18.673	15.593	X	.	U	.	XBXT10g019200	20.78	26.497	X	X	X	U	ENSDARG00000033046	ccni2	109.853	111.756	27.68	X	.	.	X	.	.
ccnj	LS	gene13656	85.372	76.954	X	X	U	D	gene15074	68.842	66.797	X	X	U	.	XBXT10g003660	71.152	99.19	.	X	NA	NA	ENSDARG00000059917	ccnj	72.544	37.261	2.545	X	.	.	.	.	.
ccnk	LS	gene45449	75.156	74.45	X	X	U	.	gene3339	23.766	14.567	.	.	.	.	XBXT10g010845	7.37	10.182	X	X	.	.	ENSDARG00000034146	ccnk	28.376	20.078	12.653	X	.	.	.	.	.
ccnl1	LS	gene858	58.887	63.045	X	.	.	.	gene35627	101.525	85.844	X	.	.	.	XBXT10g005761	147.561	135.415	X	X	X	U	ENSDARG00000012140, ENSDARG00000055124	ccnl1b, ccnl1a	249.888	273.405	215.498	X	X	X	X	.	.
ccnl2	LS	gene40330	174.369	86.593	X	X	U	D	gene2850	79.718	32.754	X	.	U	.	XBXT10g003604	169.46	77.574	X	X	X	.	NA	NA	NA	NA	NA	NA	NA	NA	NA	NA	NA
ccno	LS	gene8951	12.219	33.115	X	X	.	D	gene4519	5.916	14.169	X	X	U	D	XBXT10g001423	23.794	45.815	X	X	.	.	NA	NA	NA	NA	NA	NA	NA	NA	NA	NA	NA
ccnp	L	gene16165	78.59	68.291	.	.	.	.	NA	NA	NA	NA	NA	NA	NA	XBXT10g014745	142.621	127.563	X	X	.	.	ENSDARG00000055250	cntd2	1373.84	909.32	39.752	X	.	.	.	.	.
ccnq	S	NA	NA	NA	NA	NA	NA	NA	gene7209	29.019	29.702	X	.	.	.	XBXT10g000068	36.434	35.641	X	X	X	U	ENSDARG00000037537	ccnq	79.459	72.26	16.109	X	.	.	.	.	.
ccnt1	LS	gene38728	74.461	50.244	.	.	U	.	gene18626	16.074	8.006	.	.	.	.	XBXT10g004904	45.292	44.118	X	X	X	U	ENSDARG00000017525	ccnt1	30.93	9.602	13.099	X	.	X	X	.	.
ccnt2	LS	gene18015	16.342	19.556	X	X	D	D	gene37760	68.874	65.817	X	X	.	D	XBXT10g015772	72.91	88.374	X	X	X	.	ENSDARG00000036510, ENSDARG00000036685	ccnt2b, ccnt2a	236.564	270.609	223.011	X	X	X	X	.	.
ccny	L	gene6658	30.152	32.698	.	.	.	.	NA	NA	NA	NA	NA	NA	NA	XBXT10g000387	6.848	9.328	X	X	.	.	NA	NA	NA	NA	NA	NA	NA	NA	NA	NA	NA
ccnyl1	LS	gene14256	75.954	82.581	X	X	D	.	gene16209	48.961	31.952	.	.	.	.	XBXT10g003863	158.682	167.103	X	X	X	U	ENSDARG00000099692	ccnyl1	52.752	45.819	7.157	X	.	.	X	.	.
ccp110	LS	gene15614	82.52	61.24	.	.	.	.	gene11249	31.896	23.288	.	.	.	.	XBXT10g006219	66.348	50.121	X	X	.	.	NA	NA	NA	NA	NA	NA	NA	NA	NA	NA	NA
ccpg1	LS	gene10181	18.525	21.439	.	.	.	.	gene41447	22.444	21.588	.	.	.	.	XBXT10g007547	39.634	42.053	X	X	.	.	ENSDARG00000104126	ccpg1	19.652	10.404	2.921	X	.	.	.	.	.
ccr2	L	gene297	0.878	0.386	.	.	.	.	NA	NA	NA	NA	NA	NA	NA	XBXT10g016706	0	0	X	.	.	.	ENSDARG00000079829, ENSDARG00000105363	ccr2, ccr2	0	0.113	1.141	X	.	.	.	.	.
ccr3	L	gene11989	0	0	.	.	.	.	NA	NA	NA	NA	NA	NA	NA	XBXT10g014989	0.048	0.068	X	.	.	.	NA	NA	NA	NA	NA	NA	NA	NA	NA	NA	NA
ccr6	L	gene1723	0	0	.	.	.	.	NA	NA	NA	NA	NA	NA	NA	XBXT10g014085	0.062	0	X	.	.	.	ENSDARG00000087474, ENSDARG00000038968	ccr6a, ccr6b	12.158	17.884	3.181	X	.	.	.	.	.
ccr7	LS	gene18161	0	0	.	.	.	.	gene13628	0.025	0.073	.	.	.	.	XBXT10g004162	0.168	0	X	.	.	.	ENSDARG00000044561	ccr7	0	0	0	.	.	.	.	.	.
ccr9	L	gene49875	0	0.029	.	.	.	.	NA	NA	NA	NA	NA	NA	NA	XBXT10g008520	0	0	X	.	.	.	NA	NA	NA	NA	NA	NA	NA	NA	NA	NA	NA
ccs	L	gene11281	33.079	26.035	.	.	.	.	NA	NA	NA	NA	NA	NA	NA	XBXT10g010700	23.117	15.528	X	X	X	U	ENSDARG00000116246, ENSDARG00000092003	ccs, ccs	4.587	3.52	3.102	X	.	.	.	.	.
ccser1	L	gene16059	5.843	3.225	.	.	.	.	NA	NA	NA	NA	NA	NA	NA	XBXT10g003845	2.15	3.034	X	X	.	.	ENSDARG00000075919	ccser1	25.936	13.007	1.713	X	.	.	.	.	.
ccser2	LS	gene15120	34.838	32.695	.	.	.	.	gene12077	32.811	26.745	.	.	.	.	XBXT10g003824	40.676	40.066	X	X	X	D	ENSDARG00000087749, ENSDARG00000091535	ccser2a, ccser2b	34.02	23.718	2.253	X	.	.	X	.	.
cct2	LS	gene5465	101.346	122.079	.	.	.	.	gene13545	109.361	133.127	.	.	.	.	XBXT10g005578	227.571	257.463	X	X	.	.	ENSDARG00000104674, ENSDARG00000087206	cct2, cct2	503.74	465.049	328.202	X	.	.	.	.	.
cct3	S	NA	NA	NA	NA	NA	NA	NA	gene14983	167.903	188.994	.	.	.	.	XBXT10g018667	362.464	237.068	X	X	.	.	ENSDARG00000016173	cct3	292.971	270.034	250.231	X	.	.	X	.	.
cct4	LS	gene10632	90	84.921	.	.	.	.	gene13674	169.763	147.462	.	.	U	.	XBXT10g015916	449.814	347.31	X	X	.	.	ENSDARG00000013475	cct4	192.678	155.592	232.836	X	.	X	X	.	.
cct5	S	NA	NA	NA	NA	NA	NA	NA	gene45672	131.292	108.954	X	.	U	U	XBXT10g017497	366.994	342.184	X	X	X	U	ENSDARG00000045399	cct5	169.93	141.113	142.865	X	.	.	X	.	.
cct6a	LS	gene11901	135.055	125.569	X	.	.	.	gene10320	141.704	130.672	X	.	.	.	XBXT10g005401	636.37	633.955	X	X	.	.	ENSDARG00000021252	cct6a	161.51	138.97	124.354	X	.	.	X	.	.
cct7	LS	gene38384	157.841	137.13	.	.	.	.	gene45958	73.624	85.895	.	.	.	.	XBXT10g012797	76.798	56.908	X	X	.	.	ENSDARG00000007385	cct7	272.714	204.241	196.044	X	.	.	X	.	.
cct8	LS	gene4994	124.43	125.983	X	.	U	.	gene5601	56.19	46.063	.	.	.	U	XBXT10g015764	308.193	237.545	X	X	.	.	ENSDARG00000008243	cct8	90.381	117.603	72.432	X	.	X	X	.	.
ccz1b	LS	gene14688	56.606	47.7	.	.	.	.	gene963	57.019	40.831	.	.	.	.	XBXT10g009744	86.811	75.306	X	X	.	.	NA	NA	NA	NA	NA	NA	NA	NA	NA	NA	NA
cd151	LS	gene19934	29.341	27.265	.	.	.	.	gene6100	1.312	3.599	.	.	.	.	XBXT10g019242	22.938	18.502	X	X	.	.	ENSDARG00000038288	cd151	0	0.243	1.269	X	.	.	.	.	.
cd247	LS	gene38551	0	0	.	.	.	.	gene38702	0	0	.	.	.	.	XBXT10g008468	0	0	.	.	NA	NA	ENSDARG00000100284	cd247	0	0.94	0	.	.	.	.	.	.
cd248	LS	gene43997	0	0.011	.	.	.	.	gene45042	0	0.027	.	.	.	.	XBXT10g012152	0	0.035	X	.	.	.	NA	NA	NA	NA	NA	NA	NA	NA	NA	NA	NA
cd276	LS	gene45597	34.285	28.74	.	.	.	.	gene48908	112.947	105.645	.	.	.	.	XBXT10g014215	207.778	204.481	X	X	.	.	ENSDARG00000003061	cd276	6.75	7.652	5.506	X	.	.	.	.	.
cd28	LS	gene11527	0	0.035	.	.	.	.	gene19779	0	0	.	.	.	.	XBXT10g016551	0.07	0.049	X	.	.	.	NA	NA	NA	NA	NA	NA	NA	NA	NA	NA	NA
cd2ap	LS	gene39073	59.55	56.634	.	.	.	.	gene18394	30.001	21.146	.	.	.	.	XBXT10g002916	64.038	71.234	X	X	.	.	ENSDARG00000015224	cd2ap	15.905	12.469	17.779	X	.	X	X	.	.
cd2bp2	LS	gene12253	140.566	81.206	.	.	.	.	gene692	46.596	28.025	X	.	.	.	XBXT10g006423	54.263	39.834	X	X	X	U	ENSDARG00000027357	cd2bp2	46.93	13.92	13.009	X	.	.	X	.	.
cd302	S	NA	NA	NA	NA	NA	NA	NA	gene11021	0	0.047	.	.	.	.	XBXT10g017003	0	0	X	.	.	.	ENSDARG00000086100	cd302	30.884	33.184	4.708	X	.	.	.	.	.
cd36	LS	gene13856	0	0	.	.	.	.	gene39210	0	0.044	.	.	.	.	XBXT10g016582	0	0	X	.	.	.	ENSDARG00000032639	cd36	0	0.091	1.704	X	.	.	.	.	.
cd36l	L	gene16397	0	0	.	.	.	.	NA	NA	NA	NA	NA	NA	NA	XBXT10g015881	0	0.043	X	.	.	.	NA	NA	NA	NA	NA	NA	NA	NA	NA	NA	NA
cd37	LS	gene3718	0.117	0.27	.	.	.	.	gene6779	1.829	0.313	.	.	.	D	XBXT10g019894	3.38	2.733	X	X	.	.	ENSDARG00000075515	cd37	1.63	2.942	0.646	X	.	.	.	.	.
cd38	L	gene37743	0	0	.	.	.	.	NA	NA	NA	NA	NA	NA	NA	XBXT10g013495	0	0	X	.	.	.	NA	NA	NA	NA	NA	NA	NA	NA	NA	NA	NA
cd3e	LS	gene18053	0.57	0.67	.	.	.	.	gene5063	0	0	.	.	.	.	XBXT10g008861	0.199	0	X	.	.	.	NA	NA	NA	NA	NA	NA	NA	NA	NA	NA	NA
cd3g	S	NA	NA	NA	NA	NA	NA	NA	gene42855	0.412	0.094	.	.	.	.	XBXT10g001891	0.618	0.246	X	.	.	.	NA	NA	NA	NA	NA	NA	NA	NA	NA	NA	NA
cd40	LS	gene14753	0	0	.	.	.	.	gene47208	0.014	0	.	.	.	.	XBXT10g018416	0	0.245	X	.	.	.	ENSDARG00000054968	cd40	0	1.162	0.303	X	.	.	.	.	.
cd40lg	LS	gene15928	0	0	.	.	.	.	gene10912	0	0	.	.	.	.	XBXT10g000743	0	0	X	.	.	.	ENSDARG00000079333	cd40lg	0	0.095	0	.	.	.	.	.	.
cd44	LS	gene45623	0	0.023	.	.	.	.	gene7761	0.015	0	.	.	.	.	XBXT10g003941	0	0.028	X	.	.	.	NA	NA	NA	NA	NA	NA	NA	NA	NA	NA	NA
cd53	LS	gene2690	0	0	.	.	.	.	gene17181	0	0.255	.	.	.	.	XBXT10g009821	0	0.674	X	.	.	.	ENSDARG00000068233	zgc:64051	0	0	0.246	.	.	.	.	.	.
cd63	LS	gene2818	220.303	263.215	X	X	.	.	gene5889	164.748	185.032	.	.	.	.	XBXT10g018032	437.512	484.921	X	X	X	U	ENSDARG00000025147	cd63	0.925	2.374	8.527	X	.	.	X	.	.
cd63l	LS	gene3099	85.913	48.589	.	.	.	.	gene21734	0	0	.	.	.	.	XBXT10g008781	225.465	74.204	.	X	NA	NA	NA	NA	NA	NA	NA	NA	NA	NA	NA	NA	NA
cd74	LS	gene4417	0.66	1.965	.	.	.	.	gene36970	0	0	.	.	.	.	XBXT10g002730	0.794	0.903	X	.	.	.	ENSDARG00000036628, ENSDARG00000009087	cd74b, cd74a	0	1.115	0.665	X	.	.	.	.	.
cd79a	LS	gene44372	0	0.064	.	.	.	.	gene20137	3.711	0.422	.	.	.	.	XBXT10g003327	0.048	0.067	X	.	.	.	ENSDARG00000037473	cd79a	0	1.987	1.036	X	.	.	.	.	.
cd81	LS	gene50372	0.37	0.173	.	.	.	U	gene14111	61.023	50.706	X	X	D	.	XBXT10g001385	2.89	2.567	X	X	.	U	ENSDARG00000036080, ENSDARG00000022437	cd81a, cd81b	0	1.539	30.23	X	.	X	X	.	.
cd82	LS	gene16178	12.492	15.359	.	.	.	.	gene44206	68.642	81.189	X	X	U	D	XBXT10g014047	78.009	82.445	X	X	.	.	ENSDARG00000019098, ENSDARG00000026070	cd82a, cd82b	256.779	250.599	42.566	X	.	.	X	.	.
cd86	LS	gene13664	0.047	0	.	.	.	.	gene5800	0	0	.	.	.	.	XBXT10g003287	2.73	1.241	.	X	NA	NA	NA	NA	NA	NA	NA	NA	NA	NA	NA	NA	NA
cd8b	LS	gene39878	0.167	0	.	.	.	.	gene45300	0	0	.	.	.	.	XBXT10g009238	0	0	.	.	NA	NA	ENSDARG00000058682	cd8b	0	0	0.326	.	.	.	.	.	.
cd9	LS	gene50182	87.537	55.206	.	.	.	.	gene17218	78.461	83.627	.	.	.	.	XBXT10g005125	222.41	285.915	X	X	.	.	ENSDARG00000005842, ENSDARG00000016691	cd9a, cd9b	156.392	179.287	167.559	X	.	.	X	.	.
cd93	LS	gene41744	0	0	.	.	.	.	gene14465	0	0	.	.	.	.	XBXT10g019368	0	0.032	X	.	.	.	NA	NA	NA	NA	NA	NA	NA	NA	NA	NA	NA
cd99l2	LS	gene45060	0.326	5.667	X	X	D	D	gene7769	0.035	0.182	.	.	.	.	XBXT10g008661	19.127	20.603	X	X	X	D	ENSDARG00000056722	cd99l2	0	0.404	24.205	X	.	.	X	.	.
cda	LS	gene7865	0	0	.	.	.	.	gene11169	0	0.073	.	.	.	.	XBXT10g018307	0	0	.	.	NA	NA	ENSDARG00000038199, ENSDARG00000111188	cdab, cdaa	0	0	0.311	.	.	.	.	.	.
cdadc1	S	NA	NA	NA	NA	NA	NA	NA	gene20328	44.32	22.856	.	.	.	.	XBXT10g013892	63.657	29.424	X	X	.	.	ENSDARG00000036650	cdadc1	2.886	3.164	0.528	X	.	.	.	.	.
cdan1	L	gene45104	66.18	55.732	.	.	.	.	NA	NA	NA	NA	NA	NA	NA	XBXT10g015809	44.805	41.771	X	X	.	.	ENSDARG00000042261	cdan1	66.929	27.433	9.239	X	.	.	X	.	.
cdc123	S	NA	NA	NA	NA	NA	NA	NA	gene5269	65.073	65.818	.	.	.	.	XBXT10g017719	260.679	294.643	X	X	.	.	ENSDARG00000075025	cdc123	9.151	6.666	4.353	X	.	.	.	.	.
cdc14a	LS	gene10172	2.216	1.077	.	.	.	.	gene6890	0.006	0.089	.	.	.	.	XBXT10g011181	1.324	1.885	X	X	.	.	ENSDARG00000057016, ENSDARG00000013858	cdc14ab, cdc14aa	26.366	25.024	16.253	X	.	X	X	.	.
cdc14b	LS	gene14128	141.317	151.667	X	X	D	D	gene17596	138.93	121.283	X	X	D	D	XBXT10g010356	146.605	182.868	X	X	X	D	ENSDARG00000021483	cdc14b	213.038	207.689	88.799	X	.	.	X	.	.
cdc16	L	gene20324	78.776	88.781	.	.	.	.	NA	NA	NA	NA	NA	NA	NA	XBXT10g005600	101.928	113.167	X	X	.	.	ENSDARG00000055470	cdc16	124.437	118.29	29.776	X	.	.	X	.	.
cdc20	LS	gene18459	371.158	410.094	X	.	.	.	gene19880	451.531	529.339	X	.	U	.	XBXT10g006476	1173.63	1386.64	X	X	.	.	ENSDARG00000100741	cdc20	701.107	738.874	344.18	X	.	X	X	.	.
cdc20b	L	gene16569	0.693	0.84	.	.	.	.	NA	NA	NA	NA	NA	NA	NA	XBXT10g014869	0.039	0.11	X	.	.	.	NA	NA	NA	NA	NA	NA	NA	NA	NA	NA	NA
cdc23	LS	gene7410	56.45	58.184	.	.	.	.	gene150	26.621	29.436	.	.	.	.	XBXT10g008803	85.546	80.111	X	X	.	.	ENSDARG00000044484	cdc23	29.091	24.784	44.125	X	.	.	X	.	.
cdc25a	LS	gene2090	284.233	318.182	X	X	U	D	gene45701	105.161	15.263	.	.	.	D	XBXT10g019328	427.138	433.146	X	X	.	.	NA	NA	NA	NA	NA	NA	NA	NA	NA	NA	NA
cdc25b	LS	gene10443	0	40.662	X	X	D	D	gene48135	1.344	29.433	X	X	D	D	XBXT10g013700	0.051	11.988	X	X	X	D	ENSDARG00000010792	cdc25b	173.356	179.753	151.705	X	X	X	X	.	X
cdc25c	LS	gene665	116.385	118.884	X	.	U	.	gene8506	57.986	47.592	.	.	.	.	XBXT10g019344	192.026	191.372	X	X	.	.	NA	NA	NA	NA	NA	NA	NA	NA	NA	NA	NA
cdc27	LS	gene1557	44.182	48.669	.	.	.	.	gene35957	64.918	85.559	.	.	.	.	XBXT10g019703	34.883	47.003	X	X	.	.	ENSDARG00000056258	cdc27	125.412	116.243	38.593	X	.	X	X	.	.
cdc34	LS	gene2936	112.024	117.288	X	X	.	U	gene1244	97.812	46.532	X	X	.	.	XBXT10g016882	503.955	358.583	X	X	.	.	NA	NA	NA	NA	NA	NA	NA	NA	NA	NA	NA
cdc37	LS	gene12723	0.043	0	.	.	.	.	gene5238	78.509	84.98	X	.	.	.	XBXT10g010484	145.082	152.308	X	X	.	.	ENSDARG00000099301	cdc37	56.314	59.848	68.914	X	.	.	.	.	.
cdc37l1	LS	gene11550	31.349	32.786	.	.	.	.	gene8347	42.831	38.904	.	.	.	.	XBXT10g019807	178.656	104.282	X	X	X	.	ENSDARG00000044265	cdc37l1	190.948	177.155	24.996	X	.	.	X	.	.
cdc40	LS	gene8989	49.352	45.858	X	.	U	.	gene6161	103.093	97.586	X	.	U	.	XBXT10g001737	170.937	239.462	X	X	.	.	ENSDARG00000041226	cdc40	128.501	137.94	107.068	X	.	X	X	.	.
cdc42	LS	gene44948	69.423	67.906	X	X	U	.	gene18173	50.372	49.766	X	X	U	.	XBXT10g009281	196.567	235.079	X	X	X	U	ENSDARG00000044573, ENSDARG00000040158	cdc42, cdc42l	221.095	243.71	272.904	X	.	.	X	.	.
cdc42bpa	LS	gene5763	3.452	2.869	.	.	.	D	gene1828	1.009	1.702	.	.	.	.	XBXT10g010192	1.552	1.557	X	X	.	.	ENSDARG00000016464	cdc42bpab	36.004	30.24	3.185	X	.	.	.	.	.
cdc42bpb	L	gene40341	98.151	94.807	X	.	D	D	NA	NA	NA	NA	NA	NA	NA	XBXT10g005371	80.982	93.36	X	X	.	.	ENSDARG00000019383	cdc42bpb	72.969	37.683	20.315	X	.	.	X	.	.
cdc42ep1	LS	gene20157	0.044	0.086	.	.	.	.	gene16442	0	0	.	.	.	.	XBXT10g018171	0	0	X	.	.	.	ENSDARG00000062390, ENSDARG00000079549	cdc42ep5, cdc42ep1a	8.057	22.269	11.579	X	.	.	.	.	.
cdc42ep2	LS	gene18190	132.748	123.308	X	.	D	.	gene11195	8.632	13.697	.	.	.	.	XBXT10g003550	118.315	123.969	X	X	X	.	ENSDARG00000053959	cdc42ep2	58.615	53.584	5.768	X	.	.	.	.	.
cdc42ep3	LS	gene18547	0.369	0.156	.	.	.	D	gene5474	11.114	3.03	.	.	.	.	XBXT10g014521	0.535	0.979	X	.	.	U	ENSDARG00000052783	cdc42ep3	0	0	0	.	.	.	.	.	.
cdc42ep4	LS	gene36832	9.454	4.533	.	.	.	.	gene16248	22.516	12.814	X	X	U	D	XBXT10g000198	7.066	27.891	X	X	X	.	ENSDARG00000045036, ENSDARG00000101457	cdc42ep4b, cdc42ep4a	63.311	60.84	78.795	X	X	X	X	.	X
cdc42se1	LS	gene9487	0.032	3.305	.	.	.	.	gene7108	12.865	10.721	.	.	.	.	XBXT10g013600	0.052	0.146	X	.	.	.	ENSDARG00000023724	cdc42se1	202.519	214.71	77.853	X	.	.	X	.	.
cdc42se2	LS	gene17214	106.442	100.301	.	.	.	.	gene15318	67.954	76.23	.	.	.	.	XBXT10g015019	289.092	271.309	X	X	.	.	ENSDARG00000094577	cdc42se2	0.305	0	0.906	.	.	.	.	.	.
cdc45	LS	gene8065	298.487	203.022	.	.	.	.	gene46491	2.05	25.342	.	.	.	U	XBXT10g013343	500.01	277.964	X	X	.	.	ENSDARG00000043720	cdc45	275.647	138.319	35.901	X	.	X	X	.	.
cdc5l	LS	gene7315	41.53	42.271	.	.	.	.	gene16333	127.327	32.089	.	.	.	.	XBXT10g010886	89.356	90.071	X	X	.	.	ENSDARG00000043797	cdc5l	236.807	266.282	308.676	X	X	X	X	.	.
cdc6	LS	gene9532	371.293	414.38	X	X	U	D	gene8757	261.991	311.599	X	.	.	.	XBXT10g007010	818.504	1077.78	X	X	X	U	ENSDARG00000009942	cdc6	238.115	260.274	187.483	X	X	X	X	.	.
cdc7	L	gene46613	171.214	81.717	X	X	U	.	NA	NA	NA	NA	NA	NA	NA	XBXT10g011883	354.94	244.132	X	X	X	U	ENSDARG00000023584	cdc7	119.682	84.912	65.916	X	.	.	X	.	.
cdc73	LS	gene11285	115.63	98.762	X	X	U	.	gene12638	148.643	154.979	X	.	.	.	XBXT10g018276	455.387	435.748	X	X	X	U	ENSDARG00000020201	cdc73	114.553	137.447	81.704	X	.	X	X	.	.
cdca3	L	gene36869	355.939	190.511	X	X	U	D	NA	NA	NA	NA	NA	NA	NA	XBXT10g002020	155.071	57.142	X	X	.	.	ENSDARG00000070656	si:ch211-69g19.2	444.961	390.163	241.917	X	.	X	X	.	.
cdca4	LS	gene15994	5.486	11.359	X	X	U	D	gene19555	8.628	10.479	X	X	U	D	XBXT10g008552	87.371	92.865	X	X	X	U	ENSDARG00000042319	cdca4	69.82	64.25	78.229	X	.	X	X	.	.
cdca5	LS	gene10494	34.898	33.126	X	.	.	.	gene8510	17.355	15.06	X	.	.	.	XBXT10g003279	179.264	137.965	X	X	X	U	ENSDARG00000044437	cdca5	67.645	53.931	57.855	X	.	.	X	.	.
cdca7	LS	gene1475	47.387	72.29	X	X	U	U	gene8238	5.836	20.02	X	.	.	.	XBXT10g014135	36.72	40.648	X	X	.	.	ENSDARG00000076659, ENSDARG00000077620	cdca7b, cdca7a	1021.49	1224.14	930.864	X	.	X	X	.	.
cdca7l	LS	gene7978	77.234	93.753	.	.	.	.	gene39298	135.261	113.007	.	.	.	.	XBXT10g007470	92.003	92.128	X	X	X	U	NA	NA	NA	NA	NA	NA	NA	NA	NA	NA	NA
cdca8	LS	gene12511	87.462	109.044	.	.	.	.	gene16642	113.68	114.771	.	.	.	.	XBXT10g018399	350.481	354.712	X	X	.	.	ENSDARG00000043137	cdca8	255.793	212.648	118.795	X	.	.	X	.	.
cdca9	S	NA	NA	NA	NA	NA	NA	NA	gene2292	328.573	206.659	.	.	D	.	XBXT10g019841	930.407	689.603	X	X	.	.	ENSDARG00000088639	cdca9	276.351	129.529	2.326	X	.	.	.	.	.
cdcp1	L	gene16474	38.584	36.084	.	.	.	.	NA	NA	NA	NA	NA	NA	NA	XBXT10g016805	72.72	107.741	X	X	.	.	NA	NA	NA	NA	NA	NA	NA	NA	NA	NA	NA
cdcp2	L	gene46535	0	0	.	.	.	.	NA	NA	NA	NA	NA	NA	NA	XBXT10g009191	9.77	10.025	X	X	.	.	ENSDARG00000075866	cdcp2	0	0.184	0.384	.	.	.	.	.	.
cdh1	LS	gene13365	0.017	0.025	.	.	.	U	gene35243	0	1.438	X	X	D	D	XBXT10g019520	1.376	8.661	X	X	X	.	ENSDARG00000102750	cdh1	413.012	508.794	392.909	X	X	X	X	.	.
cdh11	LS	gene14931	0	0.02	.	.	.	.	gene18983	0	0	.	.	.	.	XBXT10g014550	0.021	0.06	X	.	.	.	ENSDARG00000021442	cdh11	0	0.289	0.905	.	.	.	.	.	.
cdh12	LS	gene12013	0	0.015	.	.	.	.	gene5915	0.374	0.015	.	.	.	.	XBXT10g000059	0.016	0.137	X	.	.	.	NA	NA	NA	NA	NA	NA	NA	NA	NA	NA	NA
cdh13	LS	gene49080	0.013	0	.	.	.	.	gene45788	0.189	0.082	.	.	.	.	XBXT10g004270	0.143	0.114	X	.	.	.	ENSDARG00000014215	cdh13	0.732	1.586	0.348	X	.	.	.	.	.
cdh15	LS	gene9742	0.184	0.219	.	.	.	.	gene2663	0.064	0	.	.	.	.	XBXT10g005244	0.245	0.19	X	.	.	.	ENSDARG00000068191	cdh15	0	0	0.135	.	.	.	.	.	.
cdh16	L	gene17063	0.424	0.206	.	.	.	.	NA	NA	NA	NA	NA	NA	NA	XBXT10g010807	21.461	25.023	X	X	.	.	ENSDARG00000077570	cdh16	0	0	0.061	.	.	.	.	.	.
cdh17	L	gene573	0.016	0.046	.	.	.	.	NA	NA	NA	NA	NA	NA	NA	XBXT10g009402	0.041	0	X	.	.	.	ENSDARG00000005112	cdh17	0.18	0.41	0.855	.	.	.	.	.	.
cdh18	S	NA	NA	NA	NA	NA	NA	NA	gene18929	0.087	0.52	.	.	.	.	XBXT10g017973	0.025	0.104	X	.	.	.	ENSDARG00000061371	cdh18a	0.779	0.925	0.617	.	.	.	.	.	.
cdh19	S	NA	NA	NA	NA	NA	NA	NA	gene8327	0	0.019	.	.	.	.	XBXT10g006039	0.274	0.212	X	.	.	.	NA	NA	NA	NA	NA	NA	NA	NA	NA	NA	NA
cdh2	LS	gene45941	0	0.172	.	.	.	D	gene44011	0.026	0.864	X	X	D	D	XBXT10g007239	0	1.293	X	X	X	D	ENSDARG00000018693	cdh2	2.739	2.037	62.51	X	X	X	X	.	X
cdh20	LS	gene5565	0	0.043	.	.	.	.	gene9887	0	0	.	.	.	.	XBXT10g002005	0	0.024	X	.	.	.	NA	NA	NA	NA	NA	NA	NA	NA	NA	NA	NA
cdh22	LS	gene40457	0.081	0.065	.	.	.	.	gene2754	0.158	0.35	.	.	.	.	XBXT10g002535	1.234	1.687	X	X	X	.	NA	NA	NA	NA	NA	NA	NA	NA	NA	NA	NA
cdh23	L	gene1620	0.242	1.717	.	.	.	U	NA	NA	NA	NA	NA	NA	NA	XBXT10g005053	2.126	2.458	X	X	.	.	ENSDARG00000094454, ENSDARG00000007561	cdh23, cdh23	7.179	8.046	3.871	X	.	.	.	.	.
cdh24	LS	gene2197	0.033	0	.	.	.	.	gene1404	0.046	0	.	.	.	.	XBXT10g010203	0.023	0.033	X	.	.	.	NA	NA	NA	NA	NA	NA	NA	NA	NA	NA	NA
cdh26	LS	gene47446	0.259	0.493	.	.	.	.	gene9175	2.256	7.668	.	.	.	D	XBXT10g009825	1.021	1.018	X	X	X	.	NA	NA	NA	NA	NA	NA	NA	NA	NA	NA	NA
cdh3	LS	gene40611	232.439	235.075	X	X	.	D	gene47619	272.988	298.166	X	X	U	D	XBXT10g001680	525.895	685.869	X	X	X	D	NA	NA	NA	NA	NA	NA	NA	NA	NA	NA	NA
cdh5	LS	gene10347	0.157	1.161	.	.	.	.	gene2580	0.147	0.029	.	.	.	.	XBXT10g013358	0.019	0.027	X	.	.	.	ENSDARG00000075549	cdh5	0.177	0.05	0.053	.	.	.	.	.	.
cdh6	LS	gene127	0.09	0	.	.	.	.	gene5065	0	3.466	.	.	D	.	XBXT10g016717	0	0.378	X	.	.	.	ENSDARG00000014522	cdh6	0.141	0.12	75.737	X	.	.	X	.	.
cdh8	LS	gene46848	0	0	.	.	.	.	gene1311	0	0.015	.	.	.	.	XBXT10g005450	0.259	0.085	X	.	.	.	NA	NA	NA	NA	NA	NA	NA	NA	NA	NA	NA
cdh9	S	NA	NA	NA	NA	NA	NA	NA	gene38300	0.067	0	.	.	.	.	XBXT10g016523	0	0	X	.	.	.	NA	NA	NA	NA	NA	NA	NA	NA	NA	NA	NA
cdhr1	LS	gene6696	0.588	1.642	.	.	.	.	gene49844	0.02	0	.	.	.	.	XBXT10g009444	0	0.209	X	.	.	.	ENSDARG00000004643	cdhr1a	0.37	0.141	2.202	X	.	.	.	.	.
cdhr2	L	gene20421	0.013	0.052	.	.	.	.	NA	NA	NA	NA	NA	NA	NA	XBXT10g010578	0.946	0.844	X	.	.	.	NA	NA	NA	NA	NA	NA	NA	NA	NA	NA	NA
cdhr3	L	gene20394	0.622	0.594	.	.	.	.	NA	NA	NA	NA	NA	NA	NA	XBXT10g019798	0.493	0.418	X	.	.	.	NA	NA	NA	NA	NA	NA	NA	NA	NA	NA	NA
cdhr4	L	gene47186	0.253	0.236	.	.	.	.	NA	NA	NA	NA	NA	NA	NA	XBXT10g005553	0.408	0.398	X	.	.	.	NA	NA	NA	NA	NA	NA	NA	NA	NA	NA	NA
cdhr5	LS	gene6797	0	0	.	.	.	.	gene47277	0	0.027	.	.	.	.	XBXT10g009192	0.013	0	X	.	.	.	NA	NA	NA	NA	NA	NA	NA	NA	NA	NA	NA
cdin1	L	gene15708	63.368	44.119	.	.	.	.	NA	NA	NA	NA	NA	NA	NA	XBXT10g019800	23.338	25.765	X	X	.	.	NA	NA	NA	NA	NA	NA	NA	NA	NA	NA	NA
cdip1	L	gene9628	12.441	7.328	.	.	.	.	NA	NA	NA	NA	NA	NA	NA	XBXT10g017582	10.758	8.158	X	X	.	.	ENSDARG00000076118	cdip1	20.096	35.569	1.605	X	.	.	.	.	.
cdipt	LS	gene46319	37.218	29.87	.	.	.	.	gene46913	112.991	105.343	.	.	.	.	XBXT10g000856	67.709	80.332	X	X	.	.	ENSDARG00000070686	cdipt	87.714	117.595	44.408	X	.	.	.	.	.
cdk1	LS	gene11162	183.218	80.892	X	X	D	.	gene8902	322.11	130.205	X	X	D	.	XBXT10g016429	789.977	343.259	X	X	.	.	ENSDARG00000087554	cdk1	214.158	85.643	110.925	X	.	.	X	.	.
cdk10	L	gene2951	35.045	35.729	.	.	.	.	NA	NA	NA	NA	NA	NA	NA	XBXT10g000981	116.568	72.59	X	X	.	.	ENSDARG00000034256	cdk10	25.322	15.262	14.625	X	.	.	.	.	.
cdk11b	LS	gene10608	73.329	74.188	.	.	.	.	gene46808	141.808	117.146	X	.	U	.	XBXT10g015256	171.047	179.764	X	X	X	U	ENSDARG00000102546	cdk11b	138.371	120.433	145.007	X	.	.	X	.	.
cdk12	LS	gene39966	65.263	46.563	X	.	.	.	gene18286	53.444	43.958	.	.	.	.	XBXT10g018772	24.093	29.136	X	X	X	U	ENSDARG00000063726	cdk12	38.005	22.365	23.044	X	.	.	X	.	.
cdk13	L	gene1672	90.048	96.128	X	.	U	.	NA	NA	NA	NA	NA	NA	NA	XBXT10g009705	67.316	81.275	X	X	X	U	ENSDARG00000063726	cdk12	38.005	22.365	23.044	X	.	.	X	.	.
cdk14	LS	gene8030	0.92	0.443	.	.	.	.	gene2493	2.582	0.917	.	.	.	.	XBXT10g016387	0.08	0.223	X	.	.	.	ENSDARG00000074665	cdk14	27.101	24.054	3.296	X	.	.	.	.	.
cdk15	L	gene12572	0.035	0.097	.	.	.	.	NA	NA	NA	NA	NA	NA	NA	XBXT10g015614	0.074	0.232	X	.	.	.	ENSDARG00000006093	cdk15	0	0.646	0.505	.	.	.	.	.	.
cdk16	LS	gene45183	18.981	13.863	.	.	.	.	gene46262	4.477	3.454	.	.	.	.	XBXT10g000082	4.569	3.248	X	X	.	.	ENSDARG00000032072	cdk16	23.971	21.534	5.509	X	.	.	X	.	.
cdk17	LS	gene4080	64.756	60.863	.	.	.	.	gene310	52.353	48.557	.	.	.	.	XBXT10g007120	119.762	157.051	X	X	.	.	ENSDARG00000079470	cdk17	64.786	59.265	30.815	X	.	.	X	.	.
cdk18	LS	gene11069	0.547	1.151	.	.	.	.	gene16944	0.157	0.508	.	.	.	.	XBXT10g008796	0.202	0.031	X	.	.	.	NA	NA	NA	NA	NA	NA	NA	NA	NA	NA	NA
cdk19	L	gene2282	0.647	0.148	.	.	.	.	NA	NA	NA	NA	NA	NA	NA	XBXT10g006017	4.524	8.598	X	X	.	.	ENSDARG00000043858	cdk19	2.464	1.405	2.93	X	.	.	.	.	.
cdk2	LS	gene19544	138.77	111.046	X	X	.	.	gene9080	148.809	80.945	X	X	.	D	XBXT10g014159	316.116	136.644	X	X	X	U	ENSDARG00000026577	cdk2	180.916	213.178	78.826	X	.	X	X	.	.
cdk2ap1	LS	gene8367	33.188	39.909	X	.	U	.	gene16958	40.134	50.745	.	.	D	.	XBXT10g003832	104.722	122.526	X	X	.	.	NA	NA	NA	NA	NA	NA	NA	NA	NA	NA	NA
cdk4	S	NA	NA	NA	NA	NA	NA	NA	gene48251	119.422	106.385	X	.	.	.	XBXT10g000704	130.388	129.402	X	X	X	.	ENSDARG00000087937	cdk4	12.207	10.439	10.556	X	.	.	.	.	.
cdk5	L	gene49168	57.897	51.996	.	.	.	.	NA	NA	NA	NA	NA	NA	NA	XBXT10g013784	15.538	10.549	X	X	.	.	ENSDARG00000056683	cdk5	73.456	61.201	18.369	X	.	.	.	.	.
cdk5r1	LS	gene6055	0.01	0.299	.	.	.	.	gene9952	0.742	0.144	.	.	.	.	XBXT10g009536	0	0.032	X	.	X	D	ENSDARG00000045087, ENSDARG00000037916	cdk5r1b, cdk5r1a	0	1.84	6.088	X	.	.	.	.	.
cdk5r2	LS	gene17834	46.978	36.383	.	.	.	.	gene4119	73.653	62.106	.	.	.	.	XBXT10g014581	30.601	28.556	X	X	.	.	ENSDARG00000071011, ENSDARG00000078671	cdk5r2a, cdk5r2b	0	0	0.137	.	.	.	.	.	.
cdk5rap1	L	gene18826	10.875	5.129	.	.	.	.	NA	NA	NA	NA	NA	NA	NA	XBXT10g014890	23.615	24.102	X	X	.	.	ENSDARG00000044925	cdk5rap1	24.263	8.123	6.374	X	.	.	X	.	.
cdk5rap2	L	gene13092	8.96	9.569	.	.	.	.	NA	NA	NA	NA	NA	NA	NA	XBXT10g002863	140.729	139.43	X	X	.	.	ENSDARG00000024219	cdk5rap2	111.306	98.48	13.83	X	.	.	.	.	.
cdk5rap3	LS	gene39113	0.038	0	.	.	.	.	gene39051	4.849	3.639	.	.	.	.	XBXT10g000325	7.467	4	X	X	.	.	ENSDARG00000045092	cdk5rap3	14.31	20.579	5.978	X	.	.	.	.	.
cdk6	L	gene12213	39.902	26.462	.	.	.	.	NA	NA	NA	NA	NA	NA	NA	XBXT10g018592	0.029	0.955	X	.	X	.	ENSDARG00000070228	cdk6	1.723	2.109	4.158	X	X	X	X	X	X
cdk7	L	gene3998	63.792	50.337	X	X	U	D	NA	NA	NA	NA	NA	NA	NA	XBXT10g004056	100.667	51.815	X	X	.	.	ENSDARG00000051916	cdk7	124.211	98.543	68.42	X	.	X	X	.	.
cdk8	S	NA	NA	NA	NA	NA	NA	NA	gene684	33.432	26.528	.	.	.	.	XBXT10g014878	128.759	122.591	X	X	.	.	ENSDARG00000016496	cdk8	113.58	105.226	32.992	X	.	.	X	.	.
cdk9	LS	gene5684	192.577	307.857	X	X	D	D	gene35538	31.288	16.268	.	.	.	.	XBXT10g005040	278.842	454.913	X	X	X	D	ENSDARG00000044811	cdk9	207.261	242.533	158.067	X	.	X	X	.	.
cdkal1	S	NA	NA	NA	NA	NA	NA	NA	gene5343	55.294	64.385	.	.	.	.	XBXT10g010368	69.373	81.432	X	X	X	U	ENSDARG00000104848	cdkal1	54.531	54.241	42.079	X	.	.	.	.	.
cdkl1	LS	gene4524	0.059	0.151	.	.	.	.	gene10043	0.196	0.089	.	.	.	.	XBXT10g014344	0.168	0.952	X	.	.	.	ENSDARG00000017329	cdkl1	0.396	0.452	8.722	X	.	.	X	.	.
cdkl2	L	gene17658	0	0.088	.	.	.	.	NA	NA	NA	NA	NA	NA	NA	XBXT10g019297	0.059	0.329	X	.	.	.	NA	NA	NA	NA	NA	NA	NA	NA	NA	NA	NA
cdkl5	LS	gene9154	5.337	5.448	.	.	.	.	gene2828	4.912	7.408	.	.	.	D	XBXT10g001264	2.894	2.49	X	X	.	.	ENSDARG00000015240	cdkl5	1.089	0.349	0	X	.	.	.	.	.
cdkn1a	LS	gene3147	4.072	5.049	X	X	U	.	gene11957	0.066	0.544	X	X	U	D	XBXT10g018726	8.07	11.135	X	X	X	U	ENSDARG00000076554	cdkn1a	0.491	12.46	6.716	X	.	X	X	.	.
cdkn2aip	LS	gene5543	70.507	55.289	X	.	.	D	gene19778	49.17	43.107	X	.	.	.	XBXT10g009090	165.542	201.158	X	X	X	U	ENSDARG00000035853	cdkn2aip	25.89	22.489	7.244	X	.	.	.	.	.
cdkn2aipnl	S	NA	NA	NA	NA	NA	NA	NA	gene40620	171.458	166.799	X	.	.	.	XBXT10g010245	183.296	238.207	X	X	X	.	ENSDARG00000053395	cdkn2aipnl	82.114	102.229	92.91	X	.	.	.	.	.
cdkn2b	LS	gene11038	0	0.079	.	.	.	.	gene49577	0	0	.	.	.	.	XBXT10g000561	0	0	X	.	.	.	NA	NA	NA	NA	NA	NA	NA	NA	NA	NA	NA
cdkn2c	LS	gene15623	0.15	0.932	X	X	.	.	gene13124	1.447	2.088	.	.	.	.	XBXT10g003026	0	0.819	X	.	.	.	ENSDARG00000057610	cdkn2c	0.396	0.226	0.157	.	.	.	.	.	.
cdkn2d	LS	gene2940	27.115	15.758	.	.	.	.	gene1848	16.184	14.705	.	.	.	.	XBXT10g016553	1.975	2.03	X	X	.	.	ENSDARG00000094176	cdkn2d	8.539	4.057	0	X	.	.	.	.	.
cdknx	L	gene2956	12.817	9.507	X	X	U	.	NA	NA	NA	NA	NA	NA	NA	XBXT10g015440	49.826	29.369	X	X	X	.	NA	NA	NA	NA	NA	NA	NA	NA	NA	NA	NA
cdnf	L	gene2278	0.219	0.466	.	.	.	.	NA	NA	NA	NA	NA	NA	NA	XBXT10g004731	1.131	1.228	X	X	.	.	ENSDARG00000075501	cdnf	0.312	0	0	.	.	.	.	.	.
cdo1	LS	gene6957	317.047	325.646	.	.	.	.	gene7053	160.545	123.423	.	.	.	.	XBXT10g009592	372.939	339.185	X	X	.	.	ENSDARG00000099389	cdo1	0	0.399	0.555	.	.	.	.	.	.
cdon	LS	gene19465	0.006	0.549	X	X	U	D	gene20054	21.362	23.659	X	X	U	D	XBXT10g003231	12.614	16.871	X	X	X	D	ENSDARG00000061328	cdon	1.218	0.232	2.575	X	.	.	X	.	.
cdpf1	L	gene42144	6.238	22.656	X	.	D	U	NA	NA	NA	NA	NA	NA	NA	XBXT10g007297	3.977	4.985	X	X	X	U	NA	NA	NA	NA	NA	NA	NA	NA	NA	NA	NA
cdr2	LS	gene2539	44.523	47.056	X	X	.	.	gene43308	44.417	57.845	X	X	U	D	XBXT10g016166	79.055	84.185	X	X	.	.	NA	NA	NA	NA	NA	NA	NA	NA	NA	NA	NA
cdr2l	LS	gene19787	3.024	3.011	.	.	.	.	gene8390	4.247	6.372	.	.	.	.	XBXT10g000231	0.158	0.12	X	.	.	.	ENSDARG00000026834	cdr2l	61.696	65.934	3.774	X	.	.	.	.	.
cds1	L	gene9225	0.8	0.889	.	.	.	D	NA	NA	NA	NA	NA	NA	NA	XBXT10g020029	3.658	3.391	X	X	.	.	ENSDARG00000019549	cds1	5.816	12.775	17.492	X	.	.	X	.	.
cds2	LS	gene13702	14.477	11.156	.	.	.	U	gene48714	58.566	58.122	X	.	U	D	XBXT10g006984	3.53	2.525	X	X	.	.	ENSDARG00000035577	cds2	73.615	68.216	20.055	X	.	.	X	.	.
cdt1	LS	gene5931	441.114	526.926	X	.	U	.	gene18166	260.917	310.247	X	X	U	D	XBXT10g013112	617.669	789.011	X	X	X	U	ENSDARG00000051854	cdt1	486.181	612.049	543.876	X	X	X	X	.	.
cdv3	LS	gene9651	188.11	209.042	X	X	.	.	gene8864	84.696	99.17	.	.	.	.	XBXT10g010455	330.962	313.785	X	X	X	U	ENSDARG00000023028	cdv3	81.626	104.393	79.847	X	.	.	X	.	.
cdx1	LS	gene17410	0.385	0.052	.	.	.	.	gene18357	0.106	0.57	X	X	D	D	XBXT10g008920	0.116	0.743	X	.	X	D	ENSDARG00000116139, ENSDARG00000114554	cdx1b, cdx1a	0.148	0.148	7.309	X	.	.	X	.	.
cdx2	LS	gene3004	0.061	0.856	.	.	.	.	gene6896	1.382	0.924	.	.	.	.	XBXT10g004289	0.056	1.404	X	X	X	D	NA	NA	NA	NA	NA	NA	NA	NA	NA	NA	NA
cdx4	LS	gene15645	0	0.58	.	.	.	.	gene257	0.044	0.459	.	.	.	.	XBXT10g017609	0.094	1.533	X	X	X	D	ENSDARG00000036292	cdx4	0	1.459	156.244	X	.	.	X	.	.
[truncated: 11,963 more rows]

## Sheet: Legend
Column	Description
Gene	Xenopus gene symbol
Homeo_status	the subgenome(s) this gene exists on in X. laevis (L only, S only, or both [LS])
Geneid.L	X. laevis gene id for the L homeolog
s5_tpm.L	transcripts per million (TPM) at NF stage 5 for the X. laevis L homeolog
s9_tpm.L	TPM at NF stage 9 for the X. laevis L homeolog
Confident_activated.L	X = signficant activation for L homeolog, . = not confidently activated
Confident_firstwave.L	X = significant first-wave activation for L homeolog, . = not significantly first-wave
PouSox_effect.L	D = significant decrease in one of the Pou/Sox MO for L homeolog, U = significant increase, . = not significantly decreased
CHX_PouSox_effect.L	D = significant decrease in one of the CHX Pou/Sox MO for L homeolog, U = significant increase, . = not significantly decreased
Geneid.S	X. laevis gene id for the S homeolog
s5_tpm.S	TPM at NF stage 5 for the S homeolog
s9_tpm.S	TPM at NF stage 9 for the S homeolog
Confident_activated.S	X = signficant activation for S homeolog, . = not confidently activated
Confident_firstwave.S	X = significant first-wave activation for S homeolog, . = not significantly first-wave
PouSox_effect.S	D = significant decrease in one of the Pou/Sox MO for S homeolog, U = significant increase, . = not significantly decreased
CHX_PouSox_effect.S	D = significant decrease in one of the CHX Pou/Sox MO for S homeolog, U = significant increase, . = not significantly decreased
Geneid.T	X. tropicalis gene id
s5_tpm.T	TPM at NF stage 5 in tropicalis (Owens et al)
s9_tpm.T	TPM at NF stage 9 in tropicalis (Owens et al)
Jgi_anno.T	X = gene is present in JGI tropicalis annotation, . = otherwise
Embryonic.T	X = >1TPM expressed in tropicalis, . = otherwise (Owens et al)
Activated.T	X = significant activation in tropicalis, . = otherwise (Gentsch et al)
PouSox_effect.T	D = significant decrease in Pou/Sox MO, U = significant increase, . = otherwise (Gentsch et. al)
Geneid.Z	Zebrafish ENSEMBL gene id
Symbol.Z	Zebrafish gene symbol
w2h_tpm.Z	TPM at 2hpf (Lee & Bonneau et al)
w4h_tpm.Z	TPM at 4hpf (Lee & Bonneau et al)
w6h_tpm.Z	TPM at 6hpf (Lee & Bonneau et al)
Embryonic.Z	X = >1TPM expressed in zebrafish, . = otherwise (Lee & Bonneau et al)
Firstwave.Z	X = significant first-wave activation in zebrafish, . = otherwise
Activated_w4h.Z	X = activated by 4hpf in zebrafish, . = otherwise (Lee & Bonneau et al)
Activated_w6h.Z	X = activated by 6hpf in zebrafish, . = otherwise (Lee & Bonneau et al)
PouSox_affected.Z	X = significant decrease in Pou/Sox LOF, . = otherwise (Lee & Bonneau et. al)
NanogPouSox_affected.Z	X = significant decrease in Nanog/Pou/Sox LOF, . = otherwise (Lee & Bonneau et. al)
