# Supplementary figures and images for: Hybridization led to a rewired pluripotency network in the allotetraploid Xenopus laevis
Source: eLife journal article supplement (doi:10.7554/elife.83952), 2023-10-03

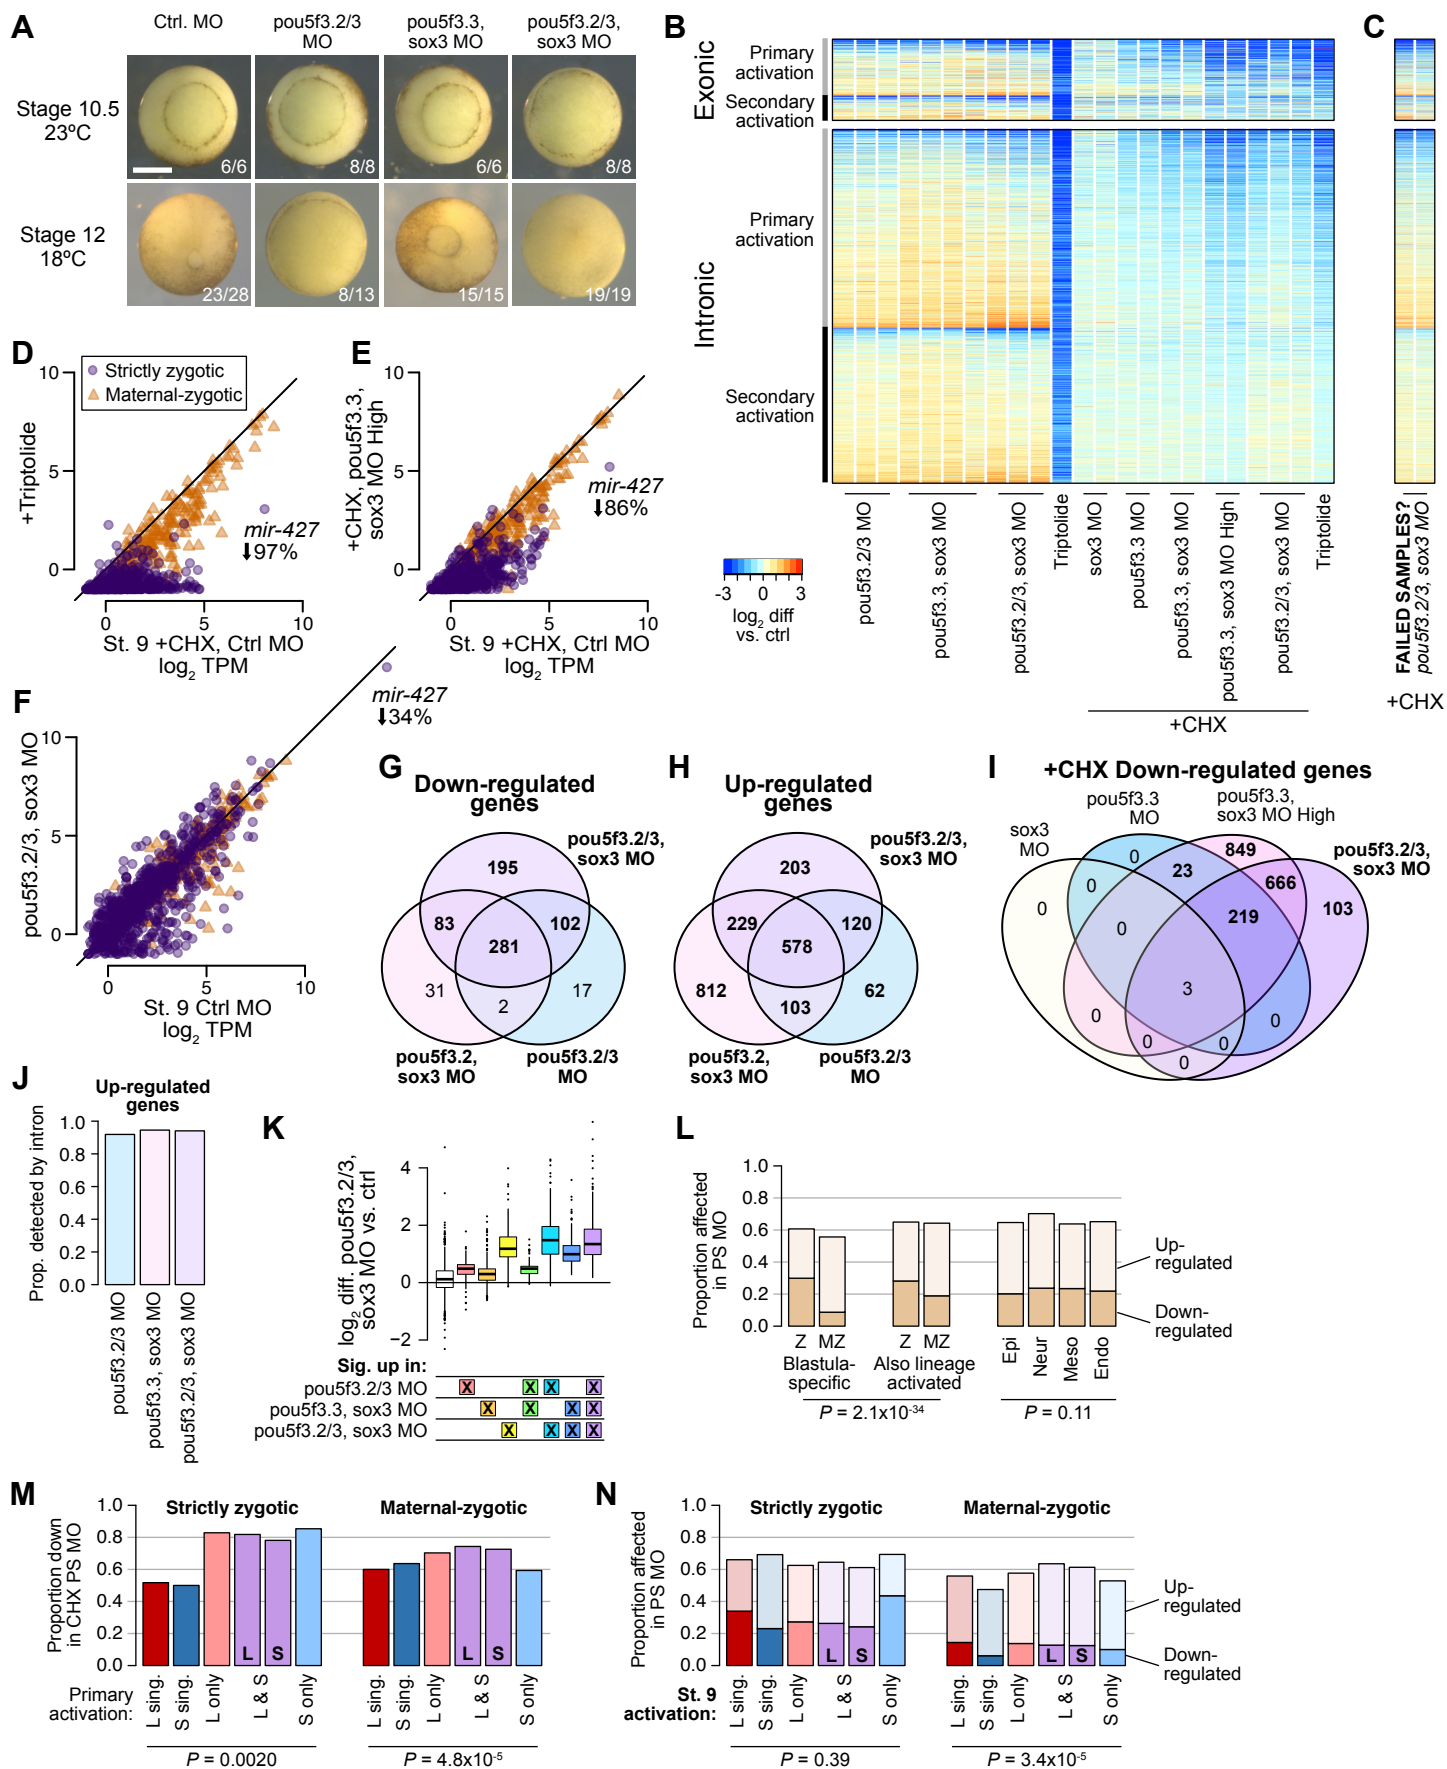

Supplement: supp [file elife-83952-supp-v1.zip]

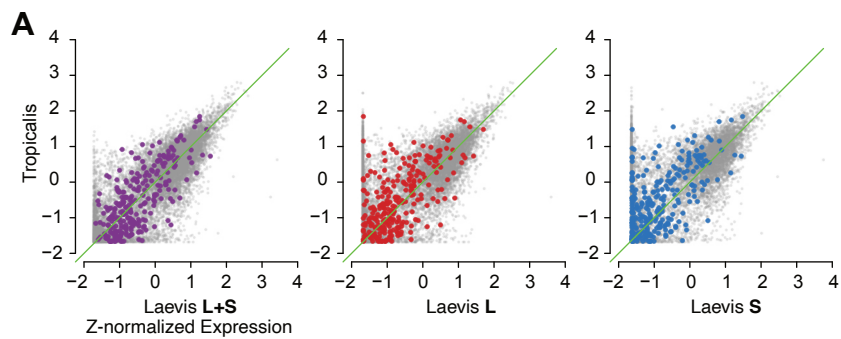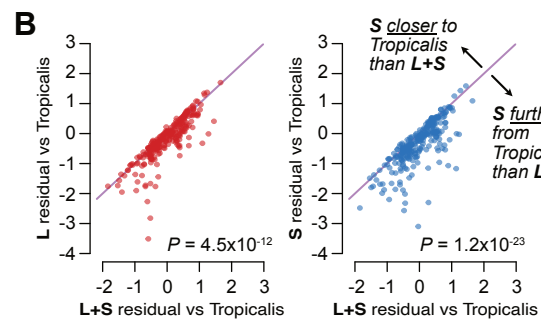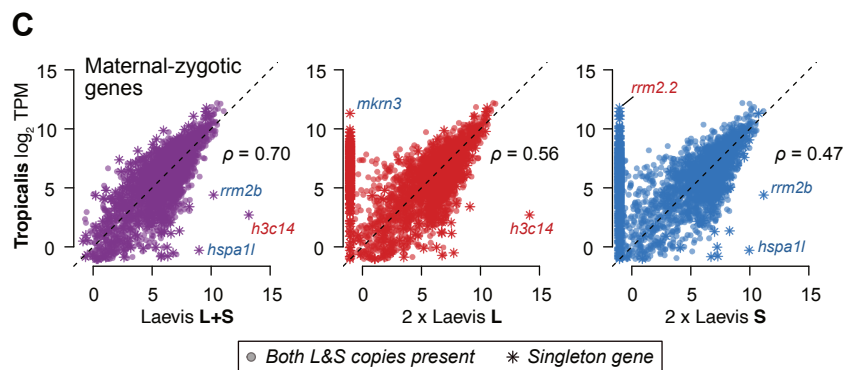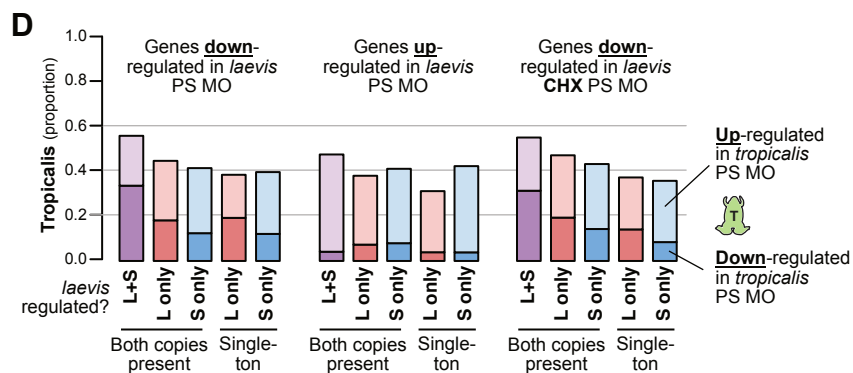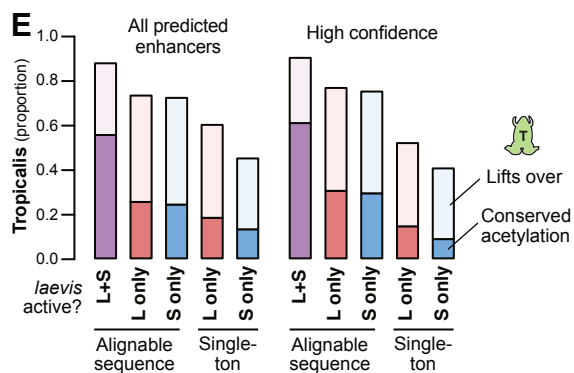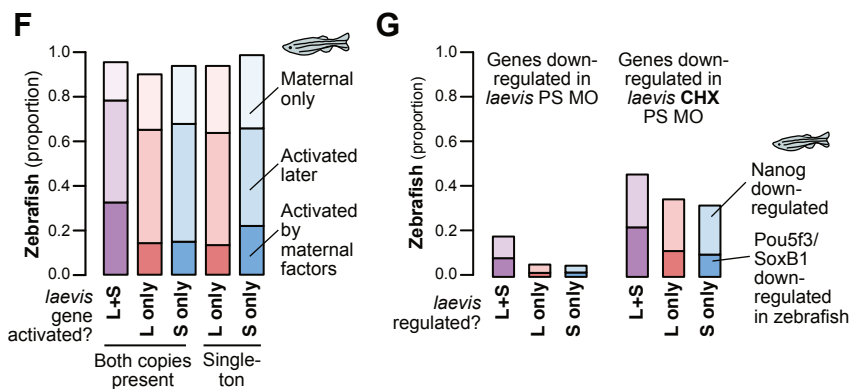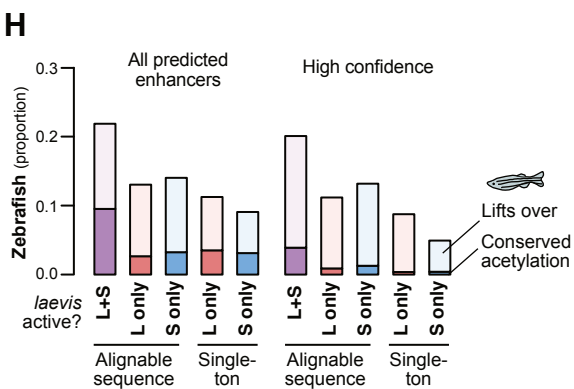

Supplement: supp [file elife-83952-supp-v1.zip]

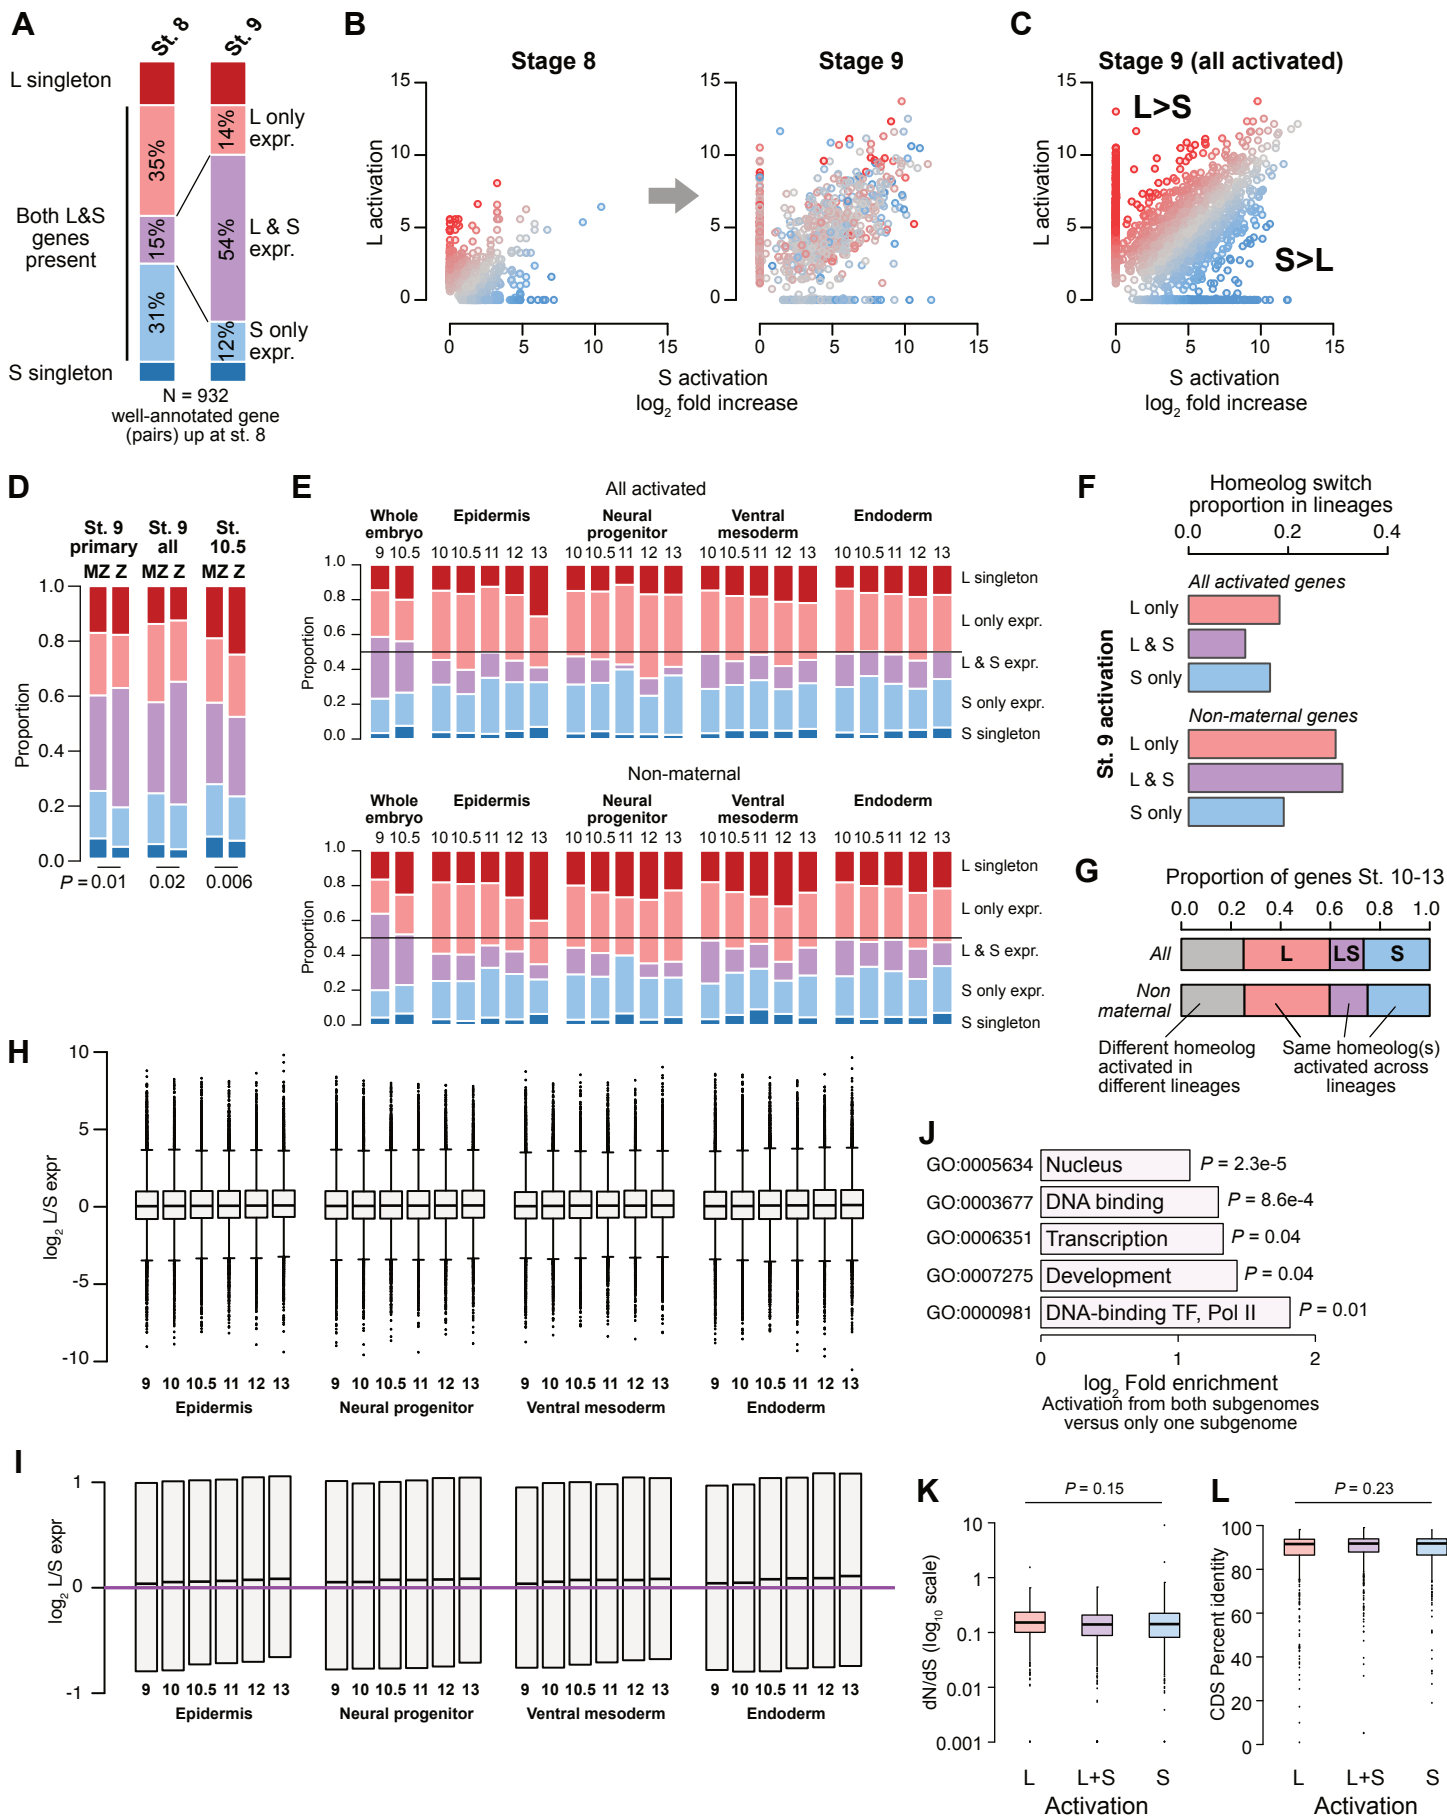

Supplement: supp [file elife-83952-supp-v1.zip]

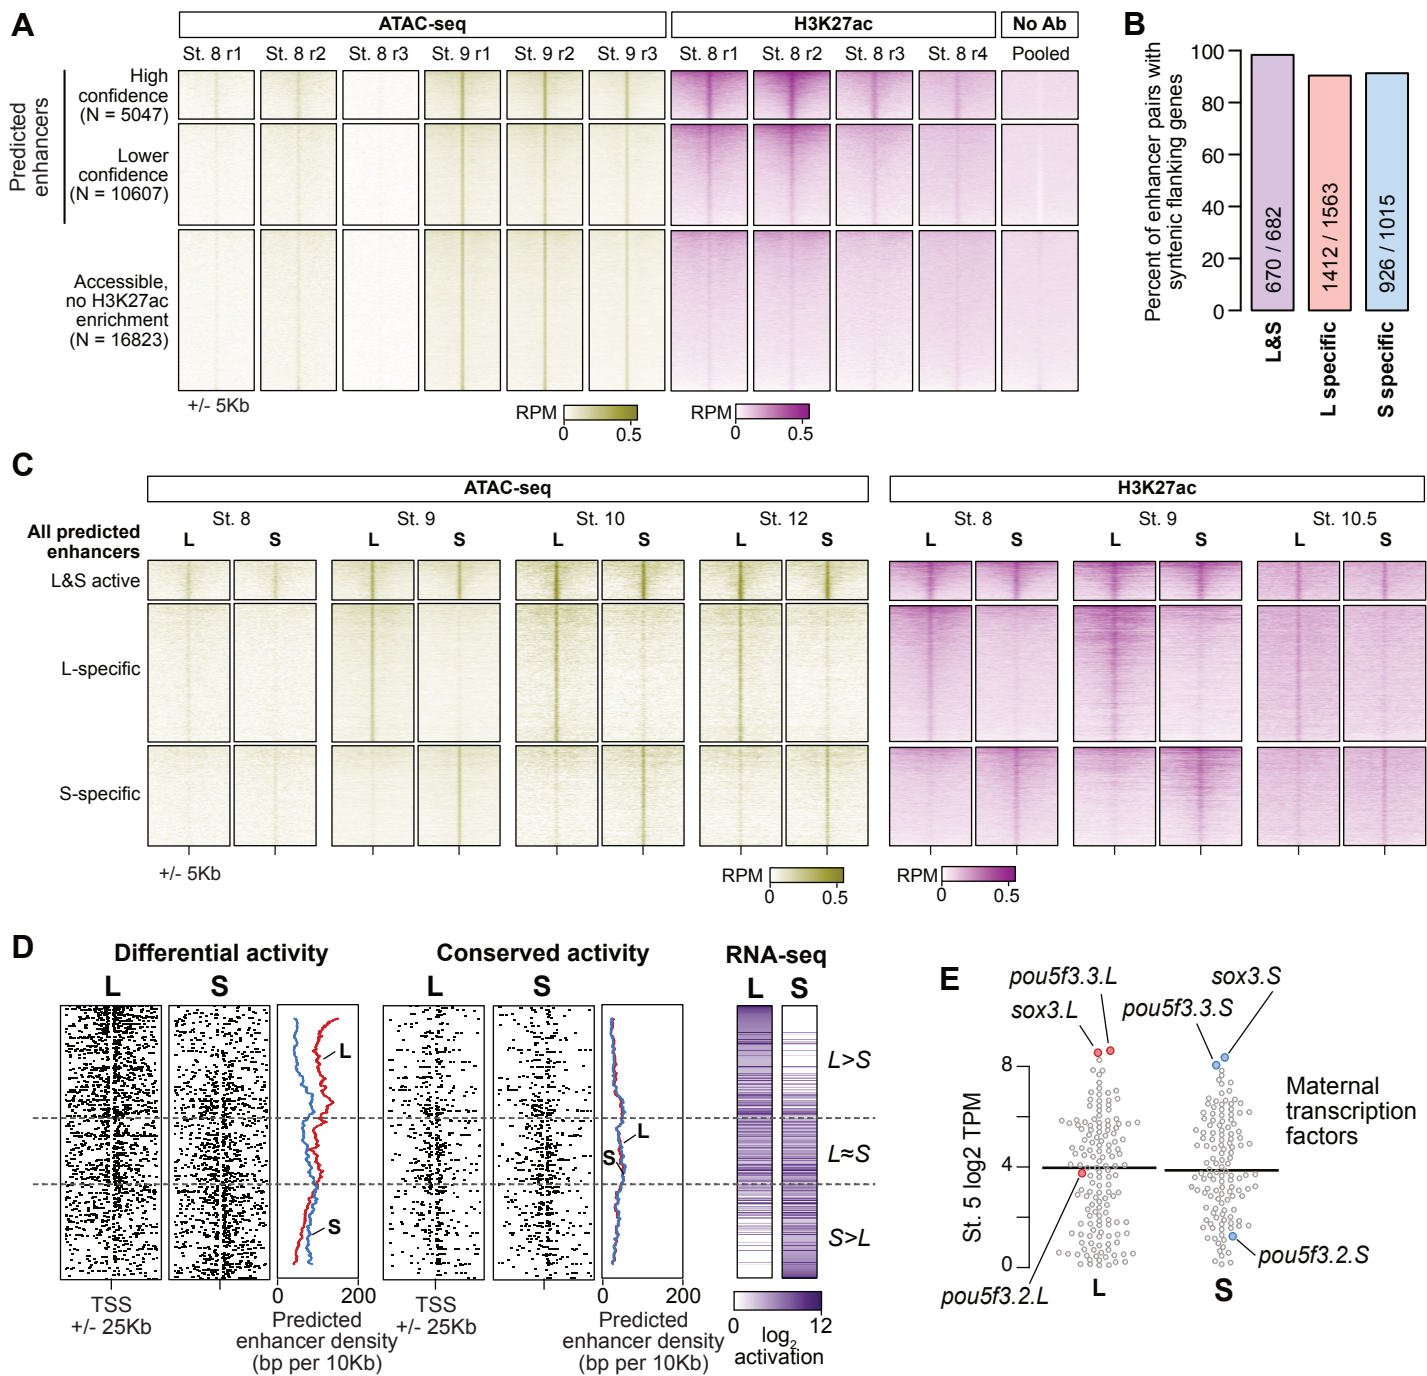

Supplement: supp [file elife-83952-supp-v1.zip]

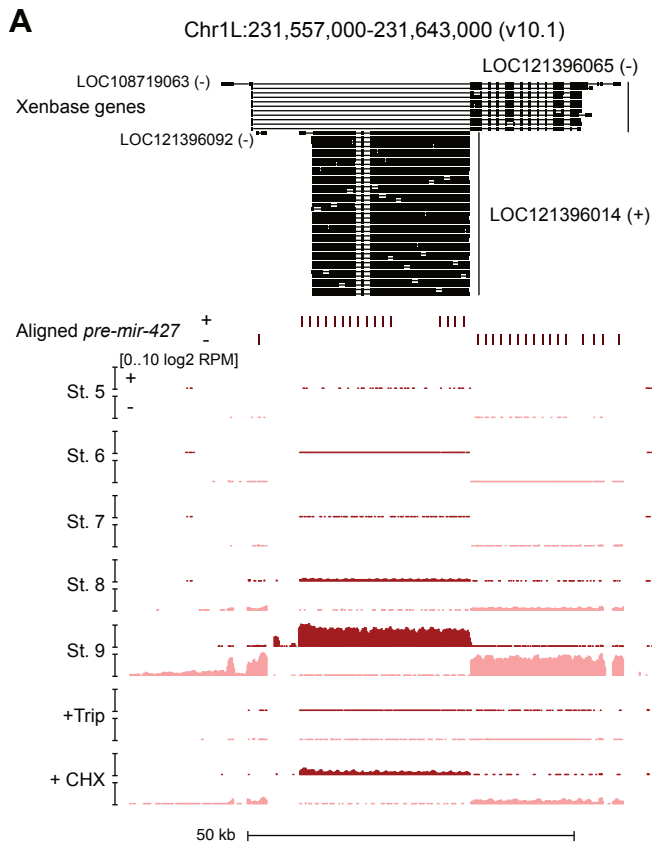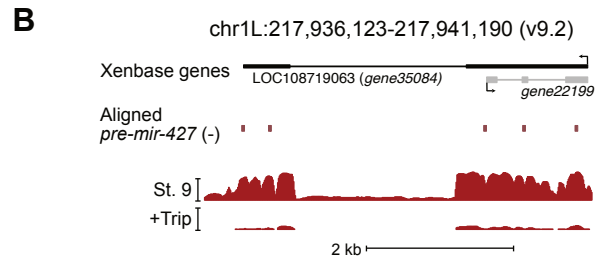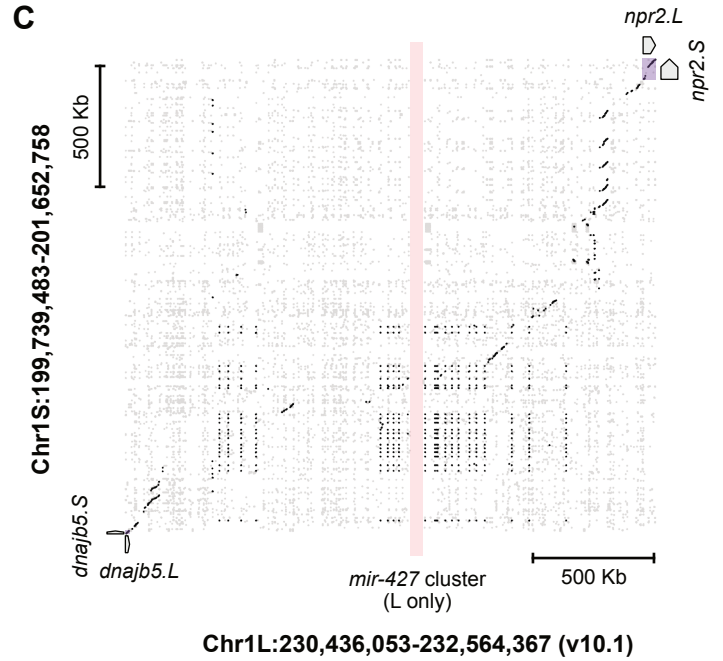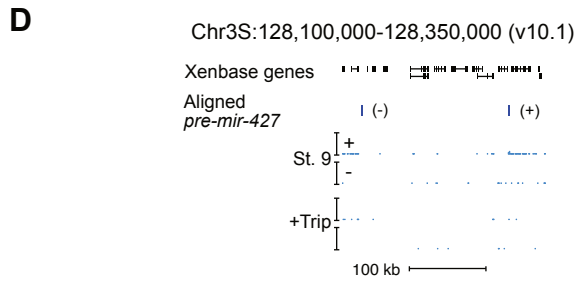

Supplement: supp [file elife-83952-supp-v1.zip]

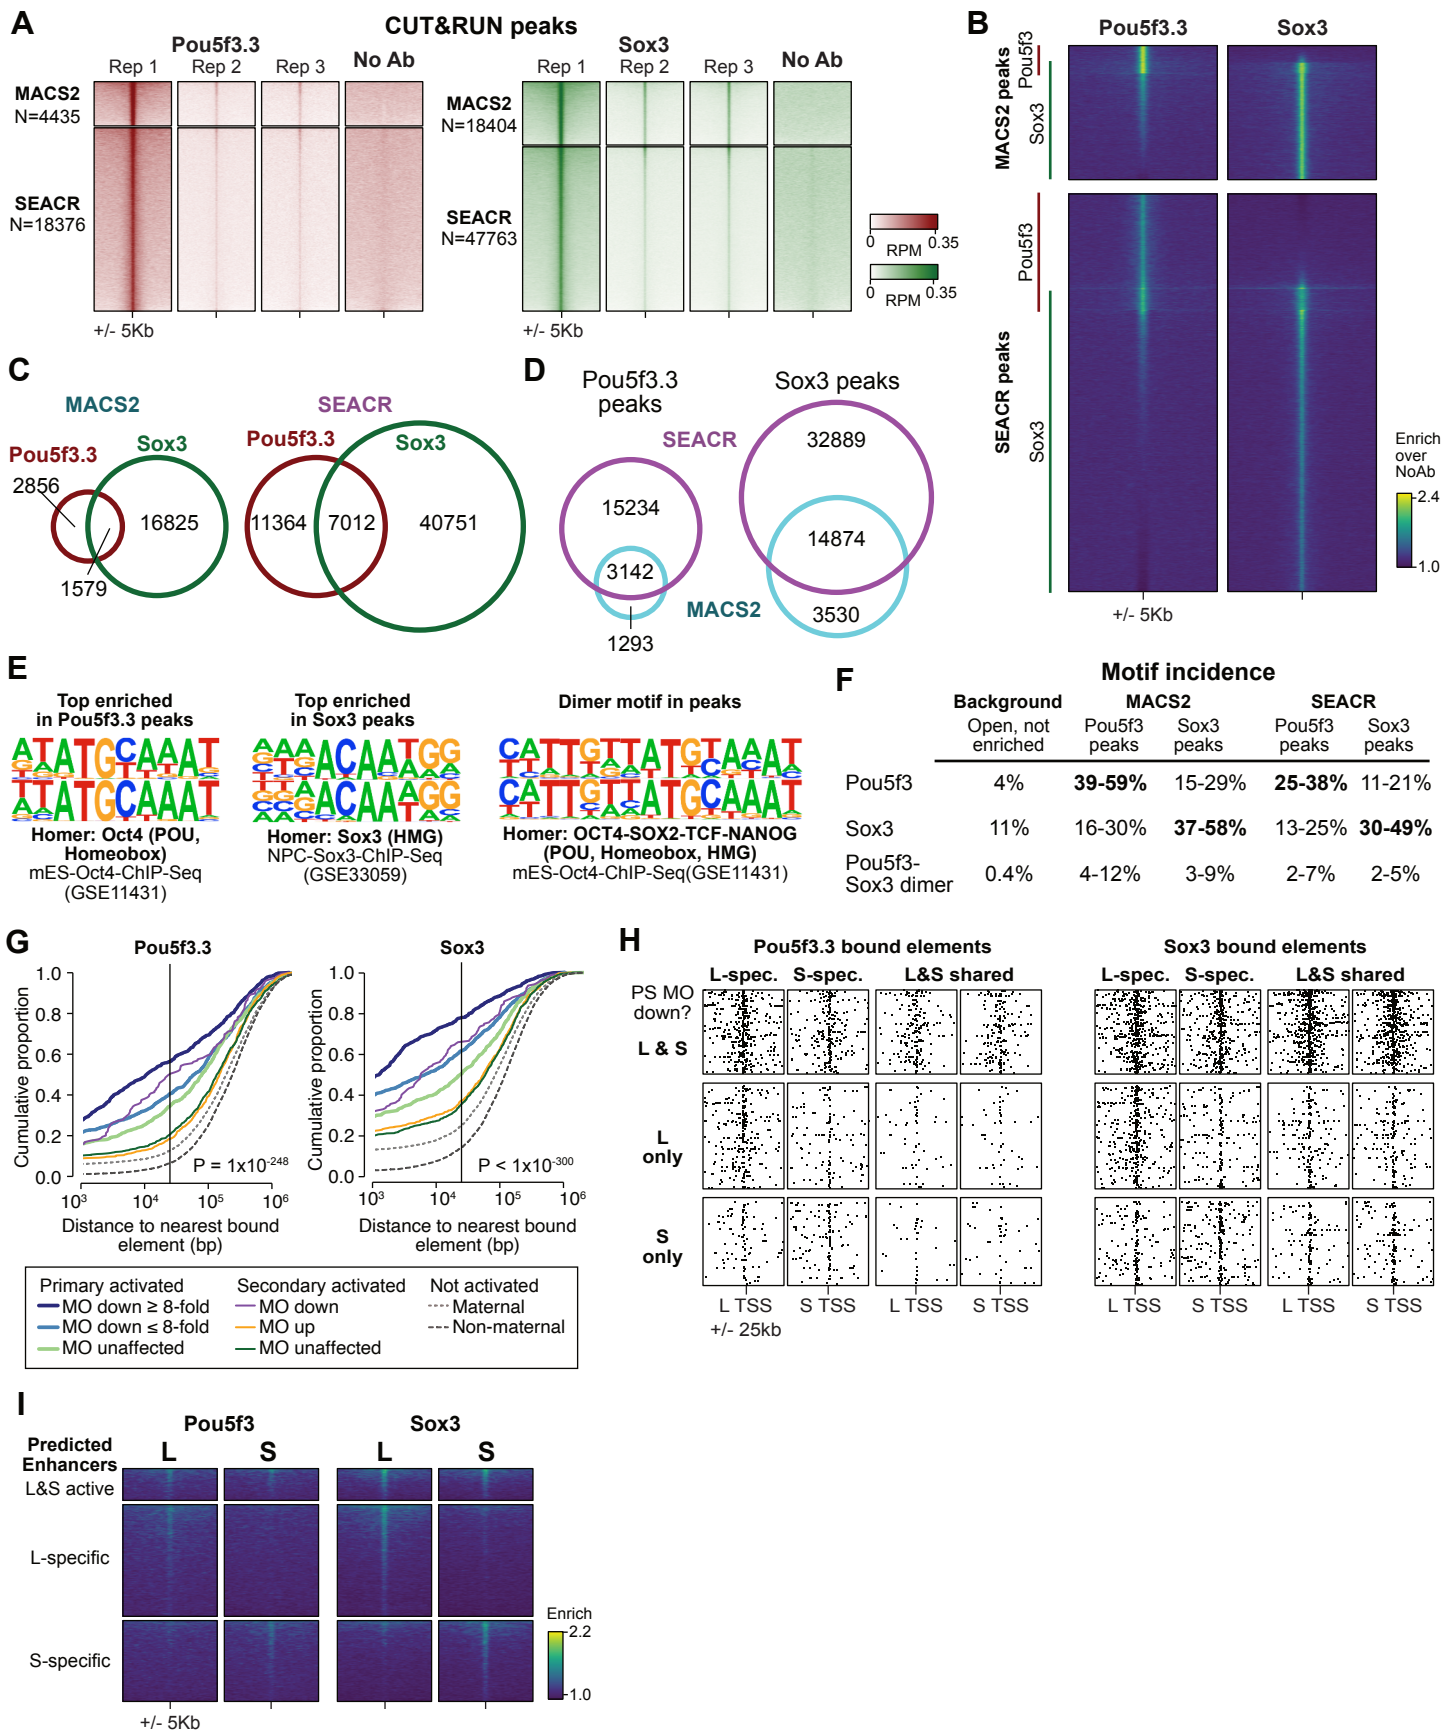

Supplement: supp [file elife-83952-supp-v1.zip]

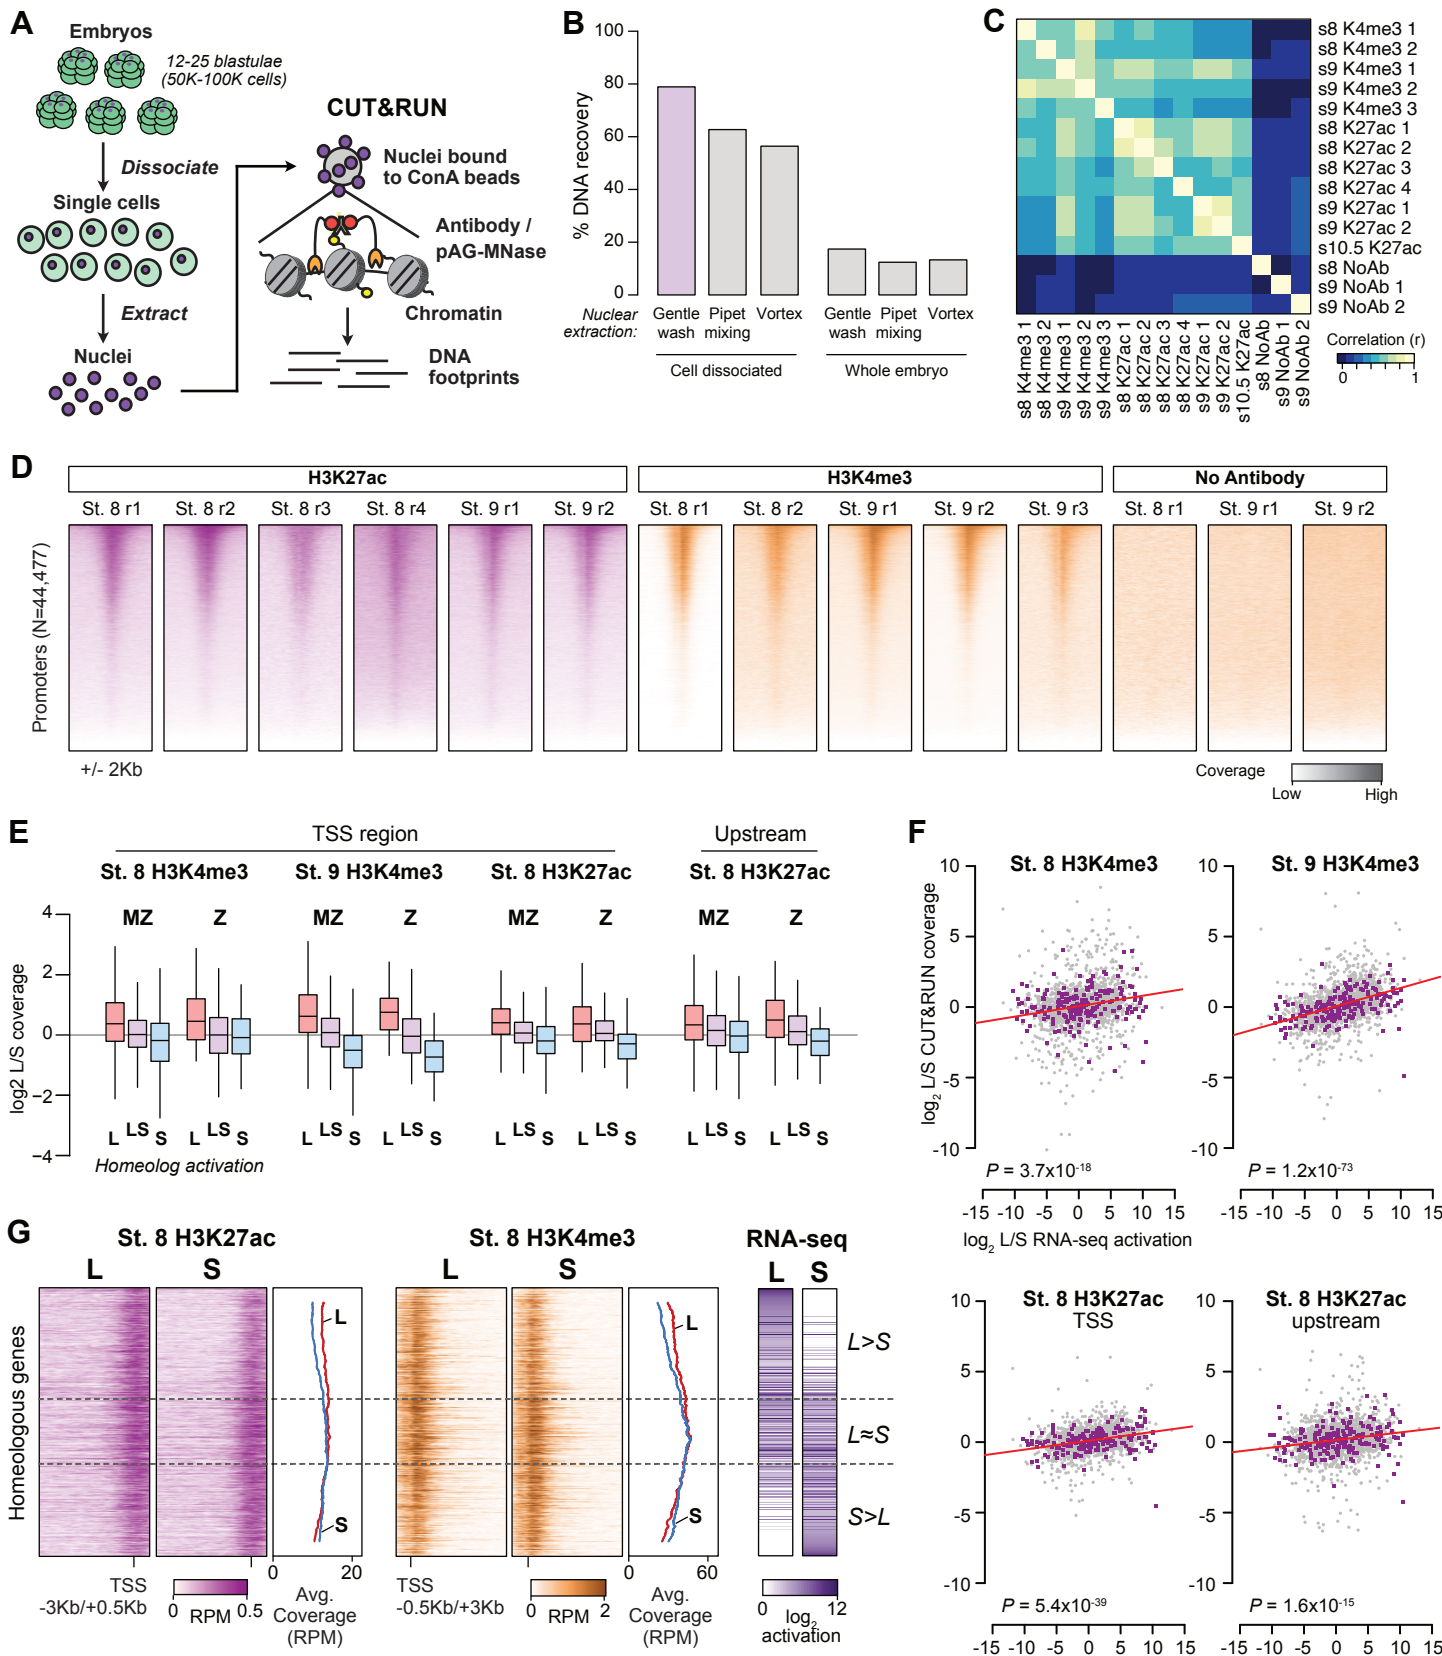

Supplement: supp [file elife-83952-supp-v1.zip]

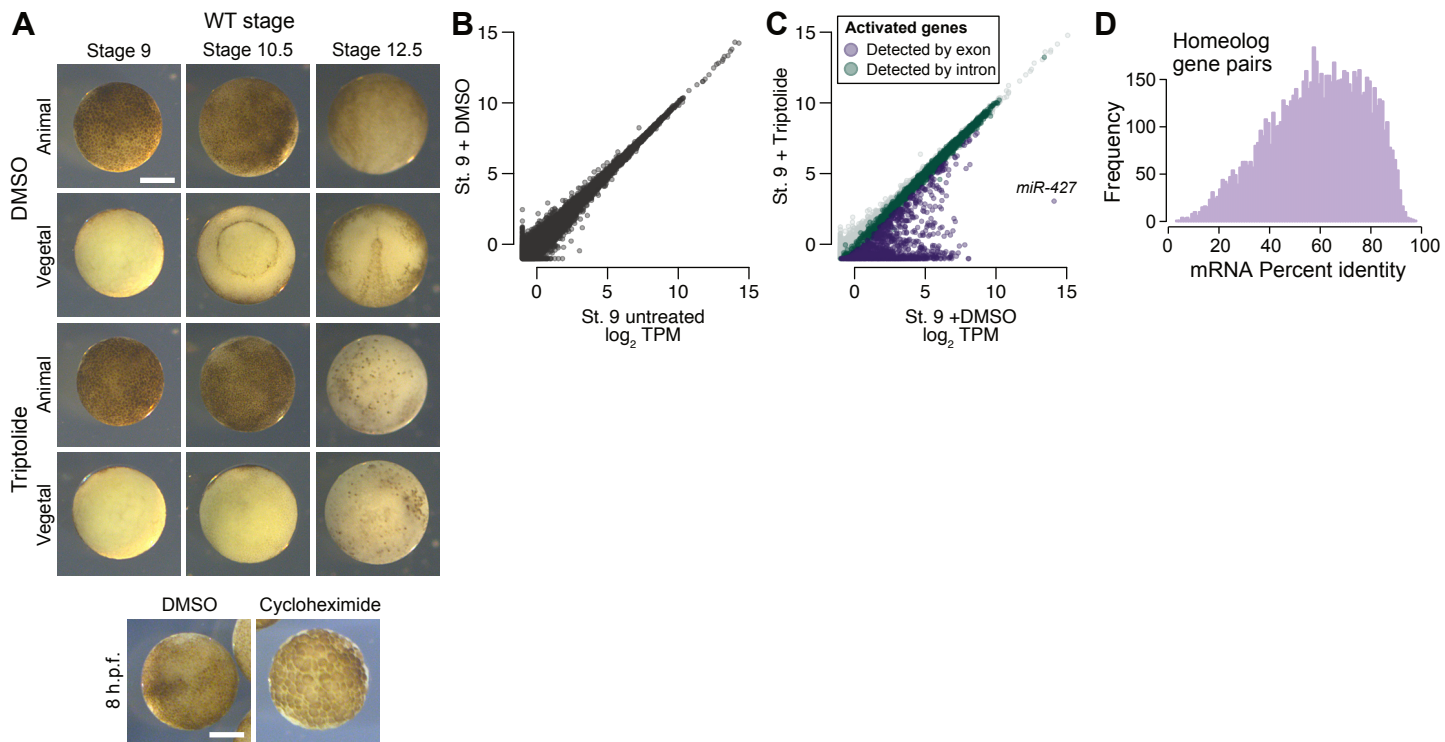

Supplement: supp [file elife-83952-supp-v1.zip]
